# Supplementary material for: Integrative Genomics Establishes GNL3 as a Pleiotropic Hub and Causal Gene for Osteoarthritis
Source: Research Square preprint supplement (doi:10.21203/rs.3.rs-7630649/v1), 2025-09-29
Supplement: Supplementary file 1 [file 0d218f23672a725537a4d34a.xlsx]

## Sheet: Sheet1
PubMed	trait_description	trait_population	qtl	qtl_population	molecule	source	tissue	probe	gene_id	chr	nsnps	pp_h0_abf	pp_h1_abf	pp_h2_abf	pp_h3_abf	pp_h4_abf	pp4_pp3	coloc_snp	locus	snp_pp_h4	gwas_p	p1_threshold	p2_threshold	qtl_p	top_snp	top_snp_gene
30643256	Neuroticism	EUR	Adipose_Subcutaneous_eQTL	EUR	eQTL	GTEx v8	Adipose Subcutaneous	ENSG00000163938.16	GNL3	3	559	0.0000218978032490134	0.00382761827003857	0.00081182069941634	0.14104760228178	0.854291060945515	6.05675706020753	rs4434138	rs352163_ALAS1	0.452955768815693	2.809e-8	5e-8	5e-8	5.05769e-7	rs352163	ALAS1
34002096	Bipolar disorder type I	EUR	Adipose_Subcutaneous_eQTL	EUR	eQTL	GTEx v8	Adipose Subcutaneous	ENSG00000163938.16	GNL3	3	1352	2.6925554185441e-10	0.00000713735673403976	0.00000859171011632681	0.226973834190556	0.773010436473337	3.40572	rs1570	rs7614498_PBRM1	0.0233970940211593	2.27e-9	5e-8	5e-8	4.3583e-9	rs7614498	PBRM1
30038396	Cognitive performance	EUR	Adipose_Subcutaneous_eQTL	EUR	eQTL	GTEx v8	Adipose Subcutaneous	ENSG00000163938.16	GNL3	3	1666	1.37434019927282e-10	0.00000527826004275137	0.00000444221980371988	0.169776680556636	0.830213598826084	4.89003316653451	rs10865973	rs4434138_STAB1	0.032677707097328	5.45e-10	5e-8	5e-8	1.73856e-9	rs4434138	STAB1
30124842	Height	EUR	Adipose_Subcutaneous_eQTL	EUR	eQTL	GTEx v8	Adipose Subcutaneous	ENSG00000163938.16	GNL3	3	103	6.01803005647323e-38	0.0000103390806675248	1.00082131470678e-34	0.0162105057011716	0.983779155218161	60.6877523350219	rs7652191	rs11720159_PBRM1	0.203937579622621	3.5e-37	5e-8	5e-8	9.99909e-9	rs11720159	PBRM1
30643256	Neuroticism	EUR	Brain_Cerebellar_Hemisphere_eQTL	EUR	eQTL	GTEx v8	Brain Cerebellar Hemisphere	ENSG00000163938.16	GNL3	3	559	9.11965247484109e-9	0.00000159406621897915	0.00115383278467149	0.200885808193573	0.797958755835884	3.97220073937215	rs9853056	rs352163_ALAS1	0.956138763602839	2.166e-7	5e-8	5e-8	2.34759e-12	rs352163	ALAS1
29483656	Schizophrenia	EUR	Brain_Cerebellar_Hemisphere_eQTL	EUR	eQTL	GTEx v8	Brain Cerebellar Hemisphere	ENSG00000163938.16	GNL3	3	764	8.1896683555899e-15	8.98788306774154e-11	0.00000116203217529501	0.0117646745736852	0.988234163304252	84.000127425088	rs2336147	rs2577831_PBRM1	0.497290659963253	7.36e-10	5e-8	5e-8	3.84267e-15	rs2577831	PBRM1
30643256	Well being spectrum	EUR	Brain_Cerebellar_Hemisphere_eQTL	EUR	eQTL	GTEx v8	Brain Cerebellar Hemisphere	ENSG00000163938.16	GNL3	3	392	2.32712858564115e-8	0.0000759662707102999	0.0000272764762111696	0.0881289577197852	0.911767776262006	10.3458363726604	rs411457	rs352163_ALAS1	0.217300071894597	6.332e-10	5e-8	5e-8	3.18014e-9	rs352163	ALAS1
34002096	Bipolar disorder type I	EUR	Brain_Cerebellar_Hemisphere_eQTL	EUR	eQTL	GTEx v8	Brain Cerebellar Hemisphere	ENSG00000163938.16	GNL3	3	1352	9.69419770406007e-15	2.56971302383066e-10	0.00000618618140832182	0.163144858639982	0.836848954921627	5.12948407873724	rs3774349	rs7614498_PBRM1	0.205373983623583	4.565e-9	5e-8	5e-8	3.84267e-15	rs7614498	PBRM1
34002096	Bipolar disorder all type	EUR	Brain_Cerebellar_Hemisphere_eQTL	EUR	eQTL	GTEx v8	Brain Cerebellar Hemisphere	ENSG00000163938.16	GNL3	3	1392	1.32557205509706e-18	2.07292366298821e-11	8.56598243052388e-10	0.012407852943884	0.987592146178787	79.5941208076281	rs2336147	rs2336147_PBRM1	0.217371773869294	3.615e-13	5e-8	5e-8	3.84267e-15	rs2336147	PBRM1
35396580	Schizophrenia	EUR	Brain_Cerebellar_Hemisphere_eQTL	EUR	eQTL	GTEx v8	Brain Cerebellar Hemisphere	ENSG00000163938.16	GNL3	3	1629	9.98288711602278e-24	9.45040596284942e-11	7.01365643699538e-15	0.0654609834844539	0.934539016421032	14.2762752203833	rs1108842	rs2710323_ITIH1	0.214994642299289	2.758e-18	5e-8	5e-8	3.84267e-15	rs2710323	ITIH1
35396580	Schizophrenia	EUR	Brain_Cerebellar_Hemisphere_eQTL	EUR	eQTL	GTEx v8	Brain Cerebellar Hemisphere	ENSG00000163938.16	GNL3	3	469	1.91590412066015e-13	0.000009732374057894	1.71433718475876e-10	0.00771618400874767	0.992274083445568	128.596477523171	rs6445358	rs6445358_WDR82	0.290612776975782	3.45e-14	5e-8	5e-8	1.44819e-9	rs6445358	WDR82
30643258	Automobile speeding propensity	EUR	Brain_Cerebellar_Hemisphere_eQTL	EUR	eQTL	GTEx v8	Brain Cerebellar Hemisphere	ENSG00000163938.16	GNL3	3	1746	5.12307620399436e-13	2.41820040206895e-11	0.00033567929216808	0.0148599687289966	0.98480435195414	66.2723031194856	rs35212380	rs13083798_PBRM1	0.201544270605365	6.68e-8	5e-8	5e-8	3.84267e-15	rs13083798	PBRM1
30124842	Body mass index	EUR	Brain_Cerebellar_Hemisphere_eQTL	EUR	eQTL	GTEx v8	Brain Cerebellar Hemisphere	ENSG00000163938.16	GNL3	3	265	1.04487738626523e-18	8.23377408280522e-8	1.03709340586312e-12	0.0808051579623571	0.919194759698865	11.3754466036323	rs2710323	rs2710323_ITIH1	0.999795669083372	4.8e-18	5e-8	5e-8	7.8071e-12	rs2710323	ITIH1
30124842	Height	EUR	Brain_Cerebellar_Hemisphere_eQTL	EUR	eQTL	GTEx v8	Brain Cerebellar Hemisphere	ENSG00000163938.16	GNL3	3	103	7.92270076550781e-40	1.36113381871758e-7	1.93879576071051e-34	0.0323411908670047	0.967658673019618	29.9203166945485	rs11720159	rs11720159_PBRM1	0.213941522011155	2.2e-37	5e-8	5e-8	1.62778e-11	rs11720159	PBRM1
29500382	Nervous	EUR	Brain_Cerebellar_Hemisphere_eQTL	EUR	eQTL	GTEx v8	Brain Cerebellar Hemisphere	ENSG00000163938.16	GNL3	3	2068	6.08866304936889e-14	5.60852103187104e-11	0.0000402692737905769	0.0361298748148336	0.963829855855229	26.6768113865569	rs13081155	rs9879090_PBRM1	0.242185508464416	4.717e-9	5e-8	5e-8	3.84267e-15	rs9879090	PBRM1
25673412	Waist-to-hip ratio adjusted for body mass index	EUR	Brain_Cerebellar_Hemisphere_eQTL	EUR	eQTL	GTEx v8	Brain Cerebellar Hemisphere	ENSG00000163938.16	GNL3	3	478	5.66223490835164e-16	3.84088893861809e-11	1.03266002827273e-7	0.00601089960987677	0.99398899708571	165.364431549055	rs13083798	rs2276824_PBRM1	0.606638564138328	4.1e-11	5e-8	5e-8	7.96883e-15	rs2276824	PBRM1
29500382	Worry	EUR	Brain_Cerebellar_Hemisphere_eQTL	EUR	eQTL	GTEx v8	Brain Cerebellar Hemisphere	ENSG00000163938.16	GNL3	3	985	2.34488662504218e-7	0.0000504887319333802	0.00027936154472047	0.0592100394842499	0.940459875750433	15.8834529404528	rs9311474	rs353547_TWF2	0.200025354334486	2.014e-8	5e-8	5e-8	1.44819e-9	rs353547	TWF2
29942085	Worry subcluster	EUR	Brain_Cerebellar_Hemisphere_eQTL	EUR	eQTL	GTEx v8	Brain Cerebellar Hemisphere	ENSG00000163938.16	GNL3	3	1693	1.46982824884362e-13	4.01557711223674e-8	8.50950209862564e-7	0.231711676744992	0.768287432148879	3.31570442604155	rs11130324	rs9836178_STIMATE-MUSTN1_STIMATE	0.600438961209973	2.302e-10	5e-8	5e-8	9.05637e-14	rs9836178	STIMATE-MUSTN1_STIMATE
29942085	Worry subcluster	EUR	Brain_Cerebellar_Hemisphere_eQTL	EUR	eQTL	GTEx v8	Brain Cerebellar Hemisphere	ENSG00000163938.16	GNL3	3	1689	2.51890220182365e-15	2.89379571082124e-10	0.00000128719406495756	0.147024011609716	0.852974700906836	5.80160132734718	rs13081155	rs353547_TWF2	0.2181690701345	2.41e-10	5e-8	5e-8	3.84267e-15	rs353547	TWF2
30952852	Sleep efficiency	EUR	Brain_Cerebellum_eQTL	EUR	eQTL	GTEx v8	Brain Cerebellum	ENSG00000163938.16	GNL3	3	1515	8.4015062309738e-17	8.76889542448098e-14	0.00015077399567595	0.156523861478626	0.843325364525613	5.38783899501976	rs9917834	rs13094687_PHF7	0.0219372897696561	5.6e-8	5e-8	5e-8	7.10919e-23	rs13094687	PHF7
34002096	Bipolar disorder type I	EUR	Brain_Cerebellum_eQTL	EUR	eQTL	GTEx v8	Brain Cerebellum	ENSG00000163938.16	GNL3	3	1352	7.37094685233769e-25	1.95387165628806e-20	0.00000404664663379871	0.10637384731392	0.893622106039446	8.4007688788606	rs11720243	rs7614498_PBRM1	0.0281734736442015	1.891e-9	5e-8	5e-8	7.10919e-23	rs7614498	PBRM1
35396580	Schizophrenia	EUR	Brain_Cerebellum_eQTL	EUR	eQTL	GTEx v8	Brain Cerebellum	ENSG00000163938.16	GNL3	3	469	1.07251550018514e-12	0.0000544814425634958	1.44440151479077e-10	0.00634364202854056	0.993601876383384	156.629562625553	rs6445358	rs6445358_WDR82	0.311535807793128	3.45e-14	5e-8	5e-8	1.58557e-8	rs6445358	WDR82
30038396	Cognitive performance	EUR	Brain_Cerebellum_eQTL	EUR	eQTL	GTEx v8	Brain Cerebellum	ENSG00000163938.16	GNL3	3	1153	0.00000252421099097339	0.00093715196258017	0.00011704063122931	0.0424966790063128	0.956446604188887	22.5063846529469	rs11923593	rs7647313_AC096887.1	0.250438989348674	1.02e-8	5e-8	5e-8	5.37493e-8	rs7647313	AC096887.1
34910505	Cortical thickness	EUR	Brain_Cerebellum_eQTL	EUR	eQTL	GTEx v8	Brain Cerebellum	ENSG00000163938.16	GNL3	3	1002	0.0000039029213673863	0.00371890896769762	0.0000542210407930396	0.0507191585975162	0.945503808472625	18.6419458567069	rs4687699	rs4687699_AC096887.1	0.713821351073031	4.53866e-9	5e-8	5e-8	2.39739e-8	rs4687699	AC096887.1
30124842	Height	EUR	Brain_Cerebellum_eQTL	EUR	eQTL	GTEx v8	Brain Cerebellum	ENSG00000163938.16	GNL3	3	103	5.61522341928955e-53	9.64705183480456e-21	3.15726338154587e-35	0.00442866225432696	0.995571337745666	224.801820633975	rs11720159	rs11720159_PBRM1	0.227656090282445	2.2e-37	5e-8	5e-8	7.10919e-23	rs11720159	PBRM1
29942086	Intelligence	EUR	Brain_Cerebellum_eQTL	EUR	eQTL	GTEx v8	Brain Cerebellum	ENSG00000163938.16	GNL3	3	1145	0.0000252374253980303	0.00083540707976604	0.00113894517434379	0.0367400045650538	0.961260405755438	26.1638619029941	rs2581790	rs2581818_SFMBT1_AC096887.1	0.302737099647359	1.392e-7	5e-8	5e-8	3.07918e-8	rs2581818	SFMBT1_AC096887.1
29500382	Worry	EUR	Brain_Cerebellum_eQTL	EUR	eQTL	GTEx v8	Brain Cerebellum	ENSG00000163938.16	GNL3	3	985	8.58482106094055e-7	0.00018484336283596	0.00030619022191576	0.0649925782147364	0.934515529718405	14.3788037863455	rs9311474	rs353547_TWF2	0.352861624730132	2.014e-8	5e-8	5e-8	5.48499e-9	rs353547	TWF2
30643258	Automobile speeding propensity	EUR	ROSMAP_CMC_eQTL	EUR	eQTL	ROSMAP	Brain Cortex	ENSG00000163938	GNL3	3	1727	8.60604782203934e-41	4.1172606232736e-39	0.00039257642069662	0.0177996290738865	0.981807794505424	55.1588906954144	rs11130324	rs13083798_PBRM1	0.194855342072224	1.015e-7	5e-8	5e-8	1.67693196e-40	rs13083798	PBRM1
30124842	Body mass index	EUR	ROSMAP_CMC_eQTL	EUR	eQTL	ROSMAP	Brain Cortex	ENSG00000163938	GNL3	3	265	7.06674073264935e-46	5.56868657119373e-35	1.275816474124e-14	0.00000536587584019557	0.99999463412415	186361.865966639	rs2710323	rs2710323_ITIH1	0.999997248256242	4.8e-18	5e-8	5e-8	1.10245273e-36	rs2710323	ITIH1
34002096	Bipolar disorder type I	EUR	ROSMAP_CMC_eQTL	EUR	eQTL	ROSMAP	Brain Cortex	ENSG00000163938	GNL3	3	1396	1.69237090311651e-42	4.58575893992802e-38	0.00000657301381547764	0.177283973964246	0.822709453021945	4.64063070465617	rs7646741	rs7614498_PBRM1	0.254194923411195	5.396e-9	5e-8	5e-8	1.67693196e-40	rs7614498	PBRM1
34002096	Bipolar disorder all type	EUR	ROSMAP_CMC_eQTL	EUR	eQTL	ROSMAP	Brain Cortex	ENSG00000163938	GNL3	3	1435	2.44798601863834e-46	3.88425385046337e-39	9.65003666995616e-10	0.0143261751029013	0.9856738239321	68.8023018602144	rs7646741	rs2336147_PBRM1	0.194958449312188	6.157e-13	5e-8	5e-8	1.67693196e-40	rs2336147	PBRM1
30124842	Height	EUR	ROSMAP_CMC_eQTL	EUR	eQTL	ROSMAP	Brain Cortex	ENSG00000163938	GNL3	3	104	1.54996367863255e-59	2.66270308774592e-27	8.55203275445555e-35	0.0137053554474568	0.986294644552543	71.9641784070299	rs11720159	rs11720159_PBRM1	0.209016524970217	2.2e-37	5e-8	5e-8	1.67755046e-30	rs11720159	PBRM1
29500382	Nervous	EUR	ROSMAP_CMC_eQTL	EUR	eQTL	ROSMAP	Brain Cortex	ENSG00000163938	GNL3	3	1698	8.72432735793844e-42	8.12359365368514e-39	0.0000355988586692657	0.0321798324910126	0.967784568650319	30.0742575002716	rs7646741	rs9879090_PBRM1	0.294694506885696	4.305e-9	5e-8	5e-8	1.67693196e-40	rs9879090	PBRM1
35396580	Schizophrenia	EUR	ROSMAP_CMC_eQTL	EUR	eQTL	ROSMAP	Brain Cortex	ENSG00000163938	GNL3	3	486	2.2068655788335e-27	1.1210394652534e-19	1.17946852200322e-10	0.00499643866286329	0.995003561219188	199.142554999161	rs6445358	rs6445358_WDR82	0.290612868168215	3.45e-14	5e-8	5e-8	5.67135675e-23	rs6445358	WDR82
35396580	Schizophrenia	EUR	ROSMAP_CMC_eQTL	EUR	eQTL	ROSMAP	Brain Cortex	ENSG00000163938	GNL3	3	1674	1.03633127900907e-51	1.00681264599528e-38	5.59550500365581e-15	0.0534146533085513	0.946585346691447	17.7214544709945	rs7646741	rs2710323_ITIH1	0.396510290446042	1.682e-18	5e-8	5e-8	1.67693196e-40	rs2710323	ITIH1
29483656	Schizophrenia	EUR	ROSMAP_CMC_eQTL	EUR	eQTL	ROSMAP	Brain Cortex	ENSG00000163938	GNL3	3	652	2.65169400012247e-42	2.82259551559037e-38	0.00000150901290166055	0.0150777661802371	0.984920724806868	65.322721750244	rs2590838	rs2577831_PBRM1	0.666611422673627	7.87e-10	5e-8	5e-8	2.98181581e-40	rs2577831	PBRM1
23974872	Schizophrenia	EUR	ROSMAP_CMC_eQTL	EUR	eQTL	ROSMAP	Brain Cortex	ENSG00000163938	GNL3	3	397	1.4990835498078e-21	1.37664289913838e-19	0.0000855993005677994	0.00686773396240008	0.993046666737032	144.595971855321	rs11717383	rs11717383_WDR82	0.279729984212525	3.601e-8	5e-8	5e-8	5.67135675e-23	rs11717383	WDR82
23974872	Schizophrenia	EUR	ROSMAP_CMC_eQTL	EUR	eQTL	ROSMAP	Brain Cortex	ENSG00000163938	GNL3	3	1361	1.35283785455184e-42	5.05750928920935e-38	0.00000647698734023959	0.241379965941839	0.758613557070823	3.14281905754188	rs7646741	rs2535627_ITIH4	0.545793037723469	3.781e-9	5e-8	5e-8	1.67693196e-40	rs2535627	ITIH4
25673412	Waist-to-hip ratio adjusted for body mass index	EUR	ROSMAP_CMC_eQTL	EUR	eQTL	ROSMAP	Brain Cortex	ENSG00000163938	GNL3	3	471	8.30086301290778e-43	5.6219728316217e-38	3.84092749997651e-7	0.0250387078146885	0.974960908092562	38.9381478991747	rs1108842	rs2276824_PBRM1	0.666558015675006	5.7e-11	5e-8	5e-8	5.42092151e-40	rs2276824	PBRM1
29500382	Worry	EUR	ROSMAP_CMC_eQTL	EUR	eQTL	ROSMAP	Brain Cortex	ENSG00000163938	GNL3	3	843	2.57618445169403e-21	5.54642236428651e-19	0.00021728142695176	0.0458258676681393	0.953956850904907	20.8169948425909	rs9311474	rs353547_TWF2	0.200337385808828	2.014e-8	5e-8	5e-8	5.67135675e-23	rs353547	TWF2
29942085	Worry subcluster	EUR	ROSMAP_CMC_eQTL	EUR	eQTL	ROSMAP	Brain Cortex	ENSG00000163938	GNL3	3	1457	6.27359799366381e-43	7.24017884743931e-38	0.00000131872632303449	0.151341751815874	0.848656929457806	5.60755323151209	rs13081155	rs353547_TWF2	0.258113518840292	2.41e-10	5e-8	5e-8	2.98181581e-40	rs353547	TWF2
29942085	Worry subcluster	EUR	ROSMAP_CMC_eQTL	EUR	eQTL	ROSMAP	Brain Cortex	ENSG00000163938	GNL3	3	1340	2.04461207585988e-43	5.72024453535604e-38	7.56953306074835e-7	0.210985046208886	0.789014196837804	3.73966881073002	rs7646741	rs9836178_STIMATE-MUSTN1_STIMATE	0.598940717722672	1.533e-10	5e-8	5e-8	1.67693196e-40	rs9836178	STIMATE-MUSTN1_STIMATE
30239722	Body mass index	EUR	ROSMAP_CMC_mQTL	EUR	mQTL	ROSMAP	Brain Cortex	cg00150837	GNL3	3	188	8.61452977727103e-12	0.00105915909361491	8.54483589080551e-11	0.00951647772465318	0.989424363087671	103.969597966324	rs1108842	rs2710323_ITIH1	0.988428295258611	1.379e-15	5e-8	5e-8	7.21456232e-7	rs2710323	ITIH1
34002096	Bipolar disorder type I	EUR	ROSMAP_CMC_mQTL	EUR	mQTL	ROSMAP	Brain Cortex	cg00150837	GNL3	3	160	7.82328863157757e-7	0.00693216618204627	0.00000869799050773063	0.0761554364647372	0.916902917033845	12.0398878871688	rs3774349	rs7614498_PBRM1	0.149465144598795	4.565e-9	5e-8	5e-8	7.21456232e-7	rs7614498	PBRM1
34002096	Bipolar disorder type I	EUR	ROSMAP_CMC_mQTL	EUR	mQTL	ROSMAP	Brain Cortex	cg00845626	GNL3	3	152	5.87456426237126e-35	4.90777156487074e-31	0.0000155942937449955	0.129408416626859	0.870575989079399	6.72735214425544	rs2336542	rs7614498_PBRM1	0.0385912765163296	1.263e-8	5e-8	5e-8	8.92090998e-36	rs7614498	PBRM1
34002096	Bipolar disorder type I	EUR	ROSMAP_CMC_mQTL	EUR	mQTL	ROSMAP	Brain Cortex	cg18595196	GNL3	3	154	8.08440310785594e-13	6.75393138691522e-9	0.0000208654061851264	0.173488817640637	0.826490310198437	4.76393995554469	rs3733041	rs7614498_PBRM1	0.0253011355631083	3.928e-9	5e-8	5e-8	6.66531526e-13	rs7614498	PBRM1
34002096	Bipolar disorder all type	EUR	ROSMAP_CMC_mQTL	EUR	mQTL	ROSMAP	Brain Cortex	cg00150837	GNL3	3	163	1.50342883379841e-10	0.00094671800685996	1.73605919239659e-9	0.00994295683859526	0.989110323268142	99.4785	rs3774349	rs2336147_PBRM1	0.205651090987652	4.239e-13	5e-8	5e-8	7.21456232e-7	rs2336147	PBRM1
30038396	Cognitive performance	EUR	ROSMAP_CMC_mQTL	EUR	mQTL	ROSMAP	Brain Cortex	cg00150837	GNL3	3	189	0.00000157470324592191	0.0212548691684943	0.0000151417644347963	0.203603841988614	0.77512457237521	3.80702330960216	rs6768697	rs4434138_STAB1	0.0323321157434256	5.03e-10	5e-8	5e-8	5.08501E-05	rs4434138	STAB1
30038396	Cognitive performance	EUR	ROSMAP_CMC_mQTL	EUR	mQTL	ROSMAP	Brain Cortex	cg00845626	GNL3	3	181	1.50202090670296e-34	1.86772920145881e-30	0.0000102556298995594	0.126653113615584	0.873336630754515	6.89550067758506	rs6768697	rs4434138_STAB1	0.0399776629836436	5.03e-10	5e-8	5e-8	3.66519523e-35	rs4434138	STAB1
30038396	Cognitive performance	EUR	ROSMAP_CMC_mQTL	EUR	mQTL	ROSMAP	Brain Cortex	cg18595196	GNL3	3	183	2.13185435455009e-13	2.65098033819278e-9	0.00000322552075514605	0.0391487968705013	0.960847974957552	24.5434866909423	rs6768697	rs4434138_STAB1	0.0483487980464733	5.03e-10	5e-8	5e-8	9.46861967e-14	rs4434138	STAB1
34910505	Cortical thickness	EUR	ROSMAP_CMC_mQTL	EUR	mQTL	ROSMAP	Brain Cortex	cg00150837	GNL3	3	167	1.89424521045977e-14	0.0159878941079166	2.30336021688847e-13	0.193618857658951	0.790393248232883	4.08221212432271	rs2268027	rs28661185_NT5DC2	0.0426009655844814	1.0389e-17	5e-8	5e-8	5.08501E-05	rs28661185	NT5DC2
34910505	Cortical thickness	EUR	ROSMAP_CMC_mQTL	EUR	mQTL	ROSMAP	Brain Cortex	cg00845626	GNL3	3	159	8.77837845900962e-40	6.57257833794375e-28	9.1535032590805e-14	0.06760203298496	0.932397967014947	13.792454543821	rs2268027	rs28661185_NT5DC2	0.0423303984417411	1.0389e-17	5e-8	5e-8	3.66519523e-35	rs28661185	NT5DC2
34910505	Cortical thickness	EUR	ROSMAP_CMC_mQTL	EUR	mQTL	ROSMAP	Brain Cortex	cg18595196	GNL3	3	160	2.09899018686279e-21	1.57156330159947e-9	4.69492870416601e-14	0.0341862212407616	0.96581377718763	28.2515511259856	rs2268027	rs28661185_NT5DC2	0.0702511419756803	1.0389e-17	5e-8	5e-8	9.46861967e-14	rs28661185	NT5DC2
29942086	Intelligence	EUR	ROSMAP_CMC_mQTL	EUR	mQTL	ROSMAP	Brain Cortex	cg00150837	GNL3	3	182	3.21737675997122e-7	0.0220214622843835	0.00000281544248406735	0.191918015224746	0.786057385310711	4.09579780402688	rs6803012	rs4687625_NT5DC2	0.0590455449514148	4.825e-11	5e-8	5e-8	5.08501E-05	rs4687625	NT5DC2
29942086	Intelligence	EUR	ROSMAP_CMC_mQTL	EUR	mQTL	ROSMAP	Brain Cortex	cg00845626	GNL3	3	174	2.78128107501937e-35	1.80744870743537e-30	0.00000220433253188866	0.142393576731631	0.857604218935843	6.0227732080371	rs6803012	rs4687625_NT5DC2	0.0788151682217995	4.825e-11	5e-8	5e-8	3.66519523e-35	rs4687625	NT5DC2
29942086	Intelligence	EUR	ROSMAP_CMC_mQTL	EUR	mQTL	ROSMAP	Brain Cortex	cg18595196	GNL3	3	176	4.27677795582254e-14	2.7792969516671e-9	6.40896372400174e-7	0.0406898327172534	0.959309523607033	23.5761481319697	rs6803012	rs4687625_NT5DC2	0.0907657341296125	4.825e-11	5e-8	5e-8	9.46861967e-14	rs4687625	NT5DC2
29500382	Nervous	EUR	ROSMAP_CMC_mQTL	EUR	mQTL	ROSMAP	Brain Cortex	cg00150837	GNL3	3	188	0.00000535360199173754	0.00168018206530392	0.0000533915187592474	0.0157739831143004	0.982487089699644	62.2852885400227	rs13081155	rs9879090_PBRM1	0.195487385829151	4.717e-9	5e-8	5e-8	5.91752509e-7	rs9879090	PBRM1
35396580	Schizophrenia	EUR	ROSMAP_CMC_mQTL	EUR	mQTL	ROSMAP	Brain Cortex	cg00150837	GNL3	3	158	9.86015771409476e-16	0.0008904042235997	1.1838656000947e-14	0.00970128204908388	0.989408313727304	101.987377412735	rs13081155	rs2710323_ITIH1	0.199695408677296	2.952e-18	5e-8	5e-8	5.91752509e-7	rs2710323	ITIH1
29483656	Schizophrenia	EUR	ROSMAP_CMC_mQTL	EUR	mQTL	ROSMAP	Brain Cortex	cg00150837	GNL3	3	154	2.15812030222814e-7	0.0012151835513123	0.00000170160472590605	0.00859111873154385	0.990191780300388	115.257606284118	rs13081155	rs1080500_RFT1	0.276864868196147	5.71e-10	5e-8	5e-8	5.91752509e-7	rs1080500	RFT1
23974872	Schizophrenia	EUR	ROSMAP_CMC_mQTL	EUR	mQTL	ROSMAP	Brain Cortex	cg00150837	GNL3	3	132	0.00000197894865216209	0.00116733442352385	0.0000200510265048257	0.0108396494225163	0.987970986178802	91.144182590128	rs13081155	rs2535627_ITIH4	0.254205898313823	7.513e-9	5e-8	5e-8	5.91752509e-7	rs2535627	ITIH4
30239722	Waist-hip ratio	EUR	ROSMAP_CMC_mQTL	EUR	mQTL	ROSMAP	Brain Cortex	cg00150837	GNL3	3	188	2.31007341457504e-10	0.00468202105700225	2.3896031607698e-9	0.0474842734588106	0.947833702863575	19.9610025345709	rs11235	rs6800707_NISCH	0.999634504409616	1.369e-14	5e-8	5e-8	0.00000518981194	rs6800707	NISCH
30239722	Waist-to-hip ratio adjusted for body mass index	EUR	ROSMAP_CMC_mQTL	EUR	mQTL	ROSMAP	Brain Cortex	cg00150837	GNL3	3	188	3.20672000795985e-31	0.00129948855718069	3.31469732309747e-30	0.0124461976345709	0.986254313808247	79.2414151506642	rs1108842	rs2276824_PBRM1	0.923738590044144	9.082e-35	5e-8	5e-8	7.21456232e-7	rs2276824	PBRM1
30643256	Well being spectrum	EUR	ROSMAP_CMC_mQTL	EUR	mQTL	ROSMAP	Brain Cortex	cg00845626	GNL3	3	104	6.43244511772876e-35	2.74698097339706e-32	0.00019215255049731	0.0811402369810449	0.918667610468454	11.321973470241	rs2289250	rs13072536_ITIH4_AC006254.1	0.0502573440680791	9.9e-9	5e-8	5e-8	1.20584718e-35	rs13072536	ITIH4_AC006254.1
30643256	Well being spectrum	EUR	ROSMAP_CMC_mQTL	EUR	mQTL	ROSMAP	Brain Cortex	cg18595196	GNL3	3	104	1.90846263165183e-12	8.15010535128812e-10	0.00014615532229469	0.0614773740194522	0.938376469841335	15.2637695543798	rs6976	rs13072536_ITIH4_AC006254.1	0.0836783059715084	5.008e-9	5e-8	5e-8	9.46861967e-14	rs13072536	ITIH4_AC006254.1
29942085	Worry subcluster	EUR	ROSMAP_CMC_mQTL	EUR	mQTL	ROSMAP	Brain Cortex	cg00150837	GNL3	3	183	2.82516253078672e-7	0.00254239596435761	0.00000252713082508134	0.0217662498079054	0.975688544580658	44.8257533195402	rs13081155	rs353547_TWF2	0.2538399478387	2.41e-10	5e-8	5e-8	5.91752509e-7	rs353547	TWF2
29942085	Worry subcluster	EUR	ROSMAP_CMC_mQTL	EUR	mQTL	ROSMAP	Brain Cortex	cg00845626	GNL3	3	169	1.76516613978322e-34	1.48608142262252e-30	0.0000168967179516725	0.14139373513178	0.858589368150263	6.07232963575119	rs34017441	rs353547_TWF2	0.0342386306149783	4.34e-9	5e-8	5e-8	8.92090998e-36	rs353547	TWF2
29942085	Worry subcluster	EUR	ROSMAP_CMC_mQTL	EUR	mQTL	ROSMAP	Brain Cortex	cg18595196	GNL3	3	169	4.88154329186373e-13	4.10973824858051e-9	0.0000087105103610385	0.0724056113398692	0.927585674039543	12.8109639139084	rs8906	rs353547_TWF2	0.0563053336351865	1.367e-9	5e-8	5e-8	7.01932177e-14	rs353547	TWF2
29483656	Schizophrenia	EUR	Brain_Frontal_Cortex_BA9_eQTL	EUR	eQTL	GTEx v8	Brain Frontal Cortex Ba9	ENSG00000163938.16	GNL3	3	764	2.35859276848244e-7	0.00258847551416067	0.00000150156904071274	0.0154972981091893	0.981912488948332	63.3602375091499	rs13083798	rs2577831_PBRM1	0.319293666348268	8.25e-10	5e-8	5e-8	1.6792e-7	rs2577831	PBRM1
34002096	Bipolar disorder type I	EUR	Brain_Frontal_Cortex_BA9_eQTL	EUR	eQTL	GTEx v8	Brain Frontal Cortex Ba9	ENSG00000163938.16	GNL3	3	1352	3.91238367597047e-7	0.010370846142485	0.00000686671939034985	0.181212824526765	0.808409071372991	4.4611029792408	rs3774349	rs7614498_PBRM1	0.115342292800556	4.565e-9	5e-8	5e-8	2.14759e-7	rs7614498	PBRM1
34002096	Bipolar disorder all type	EUR	Brain_Frontal_Cortex_BA9_eQTL	EUR	eQTL	GTEx v8	Brain Frontal Cortex Ba9	ENSG00000163938.16	GNL3	3	1392	6.53763218631994e-11	0.00102235200318429	1.15205780853088e-9	0.0170338848250411	0.981943761954342	57.6464953262341	rs13083798	rs2336147_PBRM1	0.152236446573186	5.102e-13	5e-8	5e-8	1.6792e-7	rs2336147	PBRM1
35396580	Schizophrenia	EUR	Brain_Frontal_Cortex_BA9_eQTL	EUR	eQTL	GTEx v8	Brain Frontal Cortex Ba9	ENSG00000163938.16	GNL3	3	1629	4.14376232593476e-16	0.00392273655291478	6.83496645607444e-15	0.0637716292111133	0.932305634235966	14.6194419959008	rs7646741	rs2710323_ITIH1	0.186536957632208	1.682e-18	5e-8	5e-8	2.14759e-7	rs2710323	ITIH1
30643258	Automobile speeding propensity	EUR	Brain_Frontal_Cortex_BA9_eQTL	EUR	eQTL	GTEx v8	Brain Frontal Cortex Ba9	ENSG00000163938.16	GNL3	3	1746	0.0000243003742111266	0.00114702909634558	0.00042484493038675	0.0190742503554469	0.979329575243609	51.343017785438	rs13083798	rs13083798_PBRM1	0.246032370118065	4.516e-8	5e-8	5e-8	1.6792e-7	rs13083798	PBRM1
29500382	Nervous	EUR	Brain_Frontal_Cortex_BA9_eQTL	EUR	eQTL	GTEx v8	Brain Frontal Cortex Ba9	ENSG00000163938.16	GNL3	3	2062	0.00000268422466619229	0.00247255084742642	0.0000473362538131421	0.0426485609505011	0.954828867723593	22.3883021242332	rs7646741	rs9879090_PBRM1	0.151611726854207	4.305e-9	5e-8	5e-8	2.14759e-7	rs9879090	PBRM1
30239722	Waist-to-hip ratio adjusted for body mass index	EUR	Brain_Frontal_Cortex_BA9_eQTL	EUR	eQTL	GTEx v8	Brain Frontal Cortex Ba9	ENSG00000163938.16	GNL3	3	2160	7.73992289590589e-34	0.00852784963051075	1.36864160752034e-32	0.149955461316603	0.841516689052891	5.61177753490541	rs2276824	rs2276824_PBRM1	0.994354761972393	8.897e-38	5e-8	5e-8	5.90472E-06	rs2276824	PBRM1
25673412	Waist-to-hip ratio adjusted for body mass index	EUR	Brain_Frontal_Cortex_BA9_eQTL	EUR	eQTL	GTEx v8	Brain Frontal Cortex Ba9	ENSG00000163938.16	GNL3	3	478	1.89254401344065e-8	0.00128377778116383	1.14833942519885e-7	0.00679766336975907	0.991918425089694	145.920498138002	rs13083798	rs2276824_PBRM1	0.778740547089805	4.1e-11	5e-8	5e-8	1.6792e-7	rs2276824	PBRM1
29942085	Worry subcluster	EUR	Brain_Frontal_Cortex_BA9_eQTL	EUR	eQTL	GTEx v8	Brain Frontal Cortex Ba9	ENSG00000163938.16	GNL3	3	1683	1.04086559712688e-7	0.0119577980762341	0.00000145270710150381	0.166069683750274	0.821970961379831	4.94955456539474	rs13081155	rs353547_TWF2	0.151481873263833	2.41e-10	5e-8	5e-8	2.14759e-7	rs353547	TWF2
29483656	Schizophrenia	EUR	Brain_Hypothalamus_eQTL	EUR	eQTL	GTEx v8	Brain Hypothalamus	ENSG00000163938.16	GNL3	3	764	4.71381637291068e-10	0.0000051732534851193	0.00000174391756211684	0.0181570673538838	0.981836015003687	54.0745923263688	rs13083798	rs2577831_PBRM1	0.723153932866819	8.25e-10	5e-8	5e-8	8.56547e-11	rs2577831	PBRM1
34002096	Bipolar disorder type I	EUR	Brain_Hypothalamus_eQTL	EUR	eQTL	GTEx v8	Brain Hypothalamus	ENSG00000163938.16	GNL3	3	1352	9.15830400274686e-10	0.0000242765969815146	0.00000654972978286063	0.172791376718685	0.827177796038721	4.78714743609815	rs13083798	rs7614498_PBRM1	0.316957278104025	6.903e-9	5e-8	5e-8	8.56547e-11	rs7614498	PBRM1
34002096	Bipolar disorder all type	EUR	Brain_Hypothalamus_eQTL	EUR	eQTL	GTEx v8	Brain Hypothalamus	ENSG00000163938.16	GNL3	3	1392	1.55348631549091e-13	0.00000242933496608276	1.11876917279506e-9	0.0165117765942656	0.983485792951843	59.5626877178921	rs13083798	rs2336147_PBRM1	0.427954963196114	5.102e-13	5e-8	5e-8	8.56547e-11	rs2336147	PBRM1
35396580	Schizophrenia	EUR	Brain_Hypothalamus_eQTL	EUR	eQTL	GTEx v8	Brain Hypothalamus	ENSG00000163938.16	GNL3	3	1629	9.89805551356233e-19	0.00000937009922669054	7.22670646620215e-15	0.0674798724401253	0.932510757460641	13.8190948462159	rs13083798	rs2710323_ITIH1	0.467014403267456	2.959e-18	5e-8	5e-8	8.56547e-11	rs2710323	ITIH1
30643258	Automobile speeding propensity	EUR	Brain_Hypothalamus_eQTL	EUR	eQTL	GTEx v8	Brain Hypothalamus	ENSG00000163938.16	GNL3	3	1745	4.8448673209625e-8	0.00000228687936413952	0.0003432573769852	0.015218034407265	0.984436372887714	64.6887992589731	rs13083798	rs13083798_PBRM1	0.574545242393753	4.516e-8	5e-8	5e-8	8.56547e-11	rs13083798	PBRM1
30124842	Height	EUR	Brain_Hypothalamus_eQTL	EUR	eQTL	GTEx v8	Brain Hypothalamus	ENSG00000163938.16	GNL3	3	103	5.74539566404439e-37	0.0000987069002314252	3.94165580701239e-35	0.00577770988552753	0.994123583214244	172.061872768033	rs11720159	rs11720159_PBRM1	0.215506718206534	2.2e-37	5e-8	5e-8	2.72497e-8	rs11720159	PBRM1
29500382	Nervous	EUR	Brain_Hypothalamus_eQTL	EUR	eQTL	GTEx v8	Brain Hypothalamus	ENSG00000163938.16	GNL3	3	2062	5.92233533258097e-9	0.00000545530909902885	0.0000423023136608309	0.0380044706594394	0.961947765795464	25.3114370258053	rs13083798	rs9879090_PBRM1	0.187278301900174	1.251e-8	5e-8	5e-8	8.56547e-11	rs9879090	PBRM1
30239722	Waist-to-hip ratio adjusted for body mass index	EUR	Brain_Hypothalamus_eQTL	EUR	eQTL	GTEx v8	Brain Hypothalamus	ENSG00000163938.16	GNL3	3	2160	4.79574021067305e-37	0.0000052839481650711	3.41810306150144e-33	0.0366973735997507	0.963297342452085	26.2497625295623	rs2276824	rs2276824_PBRM1	0.998482570022033	8.897e-38	5e-8	5e-8	7.98284e-10	rs2276824	PBRM1
25673412	Waist-to-hip ratio adjusted for body mass index	EUR	Brain_Hypothalamus_eQTL	EUR	eQTL	GTEx v8	Brain Hypothalamus	ENSG00000163938.16	GNL3	3	478	1.82272294692118e-11	0.00000123641574719354	7.36472579303035e-8	0.00399974819562766	0.995998941723142	249.015411223117	rs13083798	rs2276824_PBRM1	0.910665782877132	4.1e-11	5e-8	5e-8	8.56547e-11	rs2276824	PBRM1
29942085	Worry subcluster	EUR	Brain_Hypothalamus_eQTL	EUR	eQTL	GTEx v8	Brain Hypothalamus	ENSG00000163938.16	GNL3	3	1682	3.02047762759135e-10	0.0000347002164811256	0.00000172759071555539	0.19766887182322	0.802294700067535	4.0587811963891	rs13083798	rs353547_TWF2	0.402360186876801	3.922e-10	5e-8	5e-8	8.56547e-11	rs353547	TWF2
29942085	Worry subcluster	EUR	Brain_Hypothalamus_eQTL	EUR	eQTL	GTEx v8	Brain Hypothalamus	ENSG00000163938.16	GNL3	3	1693	9.3227779627764e-10	0.00025469869584587	8.00811462202516e-7	0.218000292494651	0.781744207065763	3.58597778984605	rs7646741	rs9836178_STIMATE-MUSTN1_STIMATE	0.774000433673652	1.533e-10	5e-8	5e-8	4.28093e-10	rs9836178	STIMATE-MUSTN1_STIMATE
30867560	Neuroticism	EUR	Brain_Putamen_basal_ganglia_eQTL	EUR	eQTL	GTEx v8	Brain Putamen Basal Ganglia	ENSG00000163938.16	GNL3	3	2495	0.0000297882150449582	0.00201777837204685	0.00350175816146024	0.236442235739904	0.758008439511544	3.20589270837967	rs3617	rs2071044_ITIH4_AC006254.1	0.141325330417935	9.667e-8	5e-8	5e-8	2.00861e-7	rs2071044	ITIH4_AC006254.1
29483656	Schizophrenia	EUR	Brain_Putamen_basal_ganglia_eQTL	EUR	eQTL	GTEx v8	Brain Putamen Basal Ganglia	ENSG00000163938.16	GNL3	3	764	1.93974989770705e-7	0.00212880967876492	0.00000865951751416228	0.0941315349268092	0.903730801901922	9.60072310097362	rs2577831	rs2577831_PBRM1	0.70739552752801	6.54e-11	5e-8	5e-8	9.00885e-7	rs2577831	PBRM1
30867560	Neuroticism	EUR	Brain_Putamen_basal_ganglia_eQTL	EUR	eQTL	GTEx v8	Brain Putamen Basal Ganglia	ENSG00000163938.16	GNL3	3	2495	0.0000297882150449582	0.00201777837204685	0.00350175816146024	0.236442235739904	0.758008439511544	3.20589270837967	rs3617	rs2071044_ITIH4_AC006254.1	0.141325330417935	9.667e-8	5e-8	5e-8	2.00861e-7	rs2071044	ITIH4_AC006254.1
34002096	Bipolar disorder all type	EUR	Brain_Putamen_basal_ganglia_eQTL	EUR	eQTL	GTEx v8	Brain Putamen Basal Ganglia	ENSG00000163938.16	GNL3	3	1392	7.23909822525738e-11	0.00113204694924964	8.72117250980533e-9	0.135517956445613	0.863349987811575	6.37074237581245	rs2336147	rs2336147_PBRM1	0.14094314561678	3.615e-13	5e-8	5e-8	2.60387e-7	rs2336147	PBRM1
30239722	Body mass index	EUR	Brain_Putamen_basal_ganglia_eQTL	EUR	eQTL	GTEx v8	Brain Putamen Basal Ganglia	ENSG00000163938.16	GNL3	3	2441	6.53421974615963e-15	0.00144742327419349	7.67349812727359e-13	0.169149572533382	0.829403004191649	4.9033703826119	rs6445541	rs2710323_ITIH1	0.926215893013752	3.703e-18	5e-8	5e-8	3.4694e-7	rs2710323	ITIH1
30038396	Cognitive performance	EUR	Brain_Putamen_basal_ganglia_eQTL	EUR	eQTL	GTEx v8	Brain Putamen Basal Ganglia	ENSG00000163938.16	GNL3	3	1666	5.17258946386065e-8	0.00198657306968816	0.00000624945984982804	0.239256598158131	0.758750527586435	3.17128360692045	rs2268025	rs4434138_STAB1	0.0256729320333149	5.42e-10	5e-8	5e-8	3.23887e-7	rs4434138	STAB1
30124842	Height	EUR	Brain_Putamen_basal_ganglia_eQTL	EUR	eQTL	GTEx v8	Brain Putamen Basal Ganglia	ENSG00000163938.16	GNL3	3	103	1.03241126989151e-34	0.0177370057997442	4.25364862978653e-34	0.0721683311706263	0.910094663029631	12.610720634206	rs11720159	rs11720159_PBRM1	0.203221824264585	2.2e-37	5e-8	5e-8	1.2699e-05	rs11720159	PBRM1
25673412	Waist-to-hip ratio adjusted for body mass index	EUR	Brain_Putamen_basal_ganglia_eQTL	EUR	eQTL	GTEx v8	Brain Putamen Basal Ganglia	ENSG00000163938.16	GNL3	3	478	5.39675772977326e-8	0.00366080662568662	0.00000187237907613839	0.126139723430052	0.870197543597606	6.89867965407544	rs13083798	rs2276824_PBRM1	0.459421954738142	4.1e-11	5e-8	5e-8	1.10997E-06	rs2276824	PBRM1
30643256	Neuroticism	EUR	Cells_Cultured_fibroblasts_eQTL	EUR	eQTL	GTEx v8	Cells Cultured Fibroblasts	ENSG00000163938.16	GNL3	3	559	4.10570427556381e-17	7.17655032233954e-15	0.0006799426082706	0.117968960982793	0.881351096408932	7.4710422899926	rs34005367	rs352163_ALAS1	0.437783023929261	2.182e-7	5e-8	5e-8	5.123e-20	rs352163	ALAS1
30643256	Positive affect	EUR	Cells_Cultured_fibroblasts_eQTL	EUR	eQTL	GTEx v8	Cells Cultured Fibroblasts	ENSG00000163938.16	GNL3	3	559	8.61341173714703e-17	1.01785077972809e-14	0.0014264606629176	0.167734665982336	0.830838873354739	4.95329	rs2015971	rs352163_ALAS1	0.917007463654945	6.028e-8	5e-8	5e-8	1.97128e-19	rs352163	ALAS1
30038396	Cognitive performance	EUR	Cells_Cultured_fibroblasts_eQTL	EUR	eQTL	GTEx v8	Cells Cultured Fibroblasts	ENSG00000163938.16	GNL3	3	1666	3.67682620300139e-25	1.41211359761667e-20	0.00000224328120303363	0.085240195520233	0.914757561198565	10.7315281906109	rs13078422	rs4434138_STAB1	0.100811229030607	4.84e-10	5e-8	5e-8	1.26869e-24	rs4434138	STAB1
34910505	Cortical thickness	EUR	Cells_Cultured_fibroblasts_eQTL	EUR	eQTL	GTEx v8	Cells Cultured Fibroblasts	ENSG00000163938.16	GNL3	3	1002	2.77457658909776e-8	0.0000264376265557959	0.0000102939518326006	0.00881747351561626	0.99114576716023	112.407002459928	rs34230854	rs4687699_AC096887.1	0.259251615252654	5.19279e-9	5e-8	5e-8	2.80838e-9	rs4687699	AC096887.1
29942086	Intelligence	EUR	Cells_Cultured_fibroblasts_eQTL	EUR	eQTL	GTEx v8	Cells Cultured Fibroblasts	ENSG00000163938.16	GNL3	3	1803	6.01299816505783e-26	3.13708996516183e-20	3.59631939337157e-7	0.186813304988428	0.81318633537963	4.35293586519441	rs2118540	rs4687625_NT5DC2	0.18462094710909	4.81e-11	5e-8	5e-8	1.26869e-24	rs4687625	NT5DC2
30643256	Depression symptoms	EUR	Brain-mMeta_mQTL	EUR	mQTL	Qi et al. 2018	Multiple	cg11041457	GNL3	3	184	7.46105881073122e-10	2.4615328370265e-8	0.00450881031361427	0.147905894959503	0.84758526936545	5.73057125003383	rs12635140	rs352139_TLR9_AC097637.1	0.256388269207607	4.603e-7	5e-8	5e-8	7.41806e-13	rs352139	TLR9_AC097637.1
30643256	Neuroticism	EUR	Brain-mMeta_mQTL	EUR	mQTL	Qi et al. 2018	Multiple	cg11041457	GNL3	3	243	4.41334575756574e-10	3.4883988818287e-8	0.00273497563139913	0.21539620695662	0.781868782086658	3.62990970516079	rs12635140	rs2255107_SFMBT1_AC096887.1	0.248578224259924	4.603e-7	5e-8	5e-8	7.41806e-13	rs2255107	SFMBT1_AC096887.1
29483656	Schizophrenia	EUR	Brain-mMeta_mQTL	EUR	mQTL	Qi et al. 2018	Multiple	cg00150837	GNL3	3	196	4.31738962520704e-12	1.57462650525262e-7	8.60996452980369e-7	0.0304324600149731	0.969566521521604	31.8596170353815	rs1108842	rs1080500_RFT1	0.403944881838634	6.25e-10	5e-8	5e-8	1.16321e-11	rs1080500	RFT1
23974872	Schizophrenia	EUR	Brain-mMeta_mQTL	EUR	mQTL	Qi et al. 2018	Multiple	cg00150837	GNL3	3	228	5.99414013341228e-11	2.30832007903084e-7	0.0000121986438717646	0.0460225386190817	0.953965031845098	20.7282140548754	rs3774349	rs2535627_ITIH4	0.317145385451893	7.648e-9	5e-8	5e-8	1.66892e-11	rs2535627	ITIH4
30952852	Sleep efficiency	EUR	Brain-mMeta_mQTL	EUR	mQTL	Qi et al. 2018	Multiple	cg00845626	GNL3	3	277	1.69295343032838e-35	1.29260563171732e-32	0.00015890293122656	0.120446342930211	0.879394754138561	7.30113287580759	rs35315313	rs13094687_PHF7	0.101103222316323	7.9e-8	5e-8	5e-8	3.6641e-39	rs13094687	PHF7
30952852	Sleep efficiency	EUR	Brain-mMeta_mQTL	EUR	mQTL	Qi et al. 2018	Multiple	cg18595196	GNL3	3	277	9.74584627184739e-13	7.37065603264507e-10	0.00016809405069938	0.126253753254666	0.873578151956595	6.91922520667168	rs3733039	rs13094687_PHF7	0.0781447448475775	7.4e-8	5e-8	5e-8	3.06818e-14	rs13094687	PHF7
34002096	Bipolar disorder type I	EUR	Brain-mMeta_mQTL	EUR	mQTL	Qi et al. 2018	Multiple	cg00150837	GNL3	3	270	3.49902281327112e-11	5.94189844892544e-7	0.00000668646523417055	0.112659504070367	0.887333215239565	7.87623931564035	rs1108842	rs7614498_PBRM1	0.393655385957444	5.637e-9	5e-8	5e-8	1.16321e-11	rs7614498	PBRM1
34002096	Bipolar disorder type I	EUR	Brain-mMeta_mQTL	EUR	mQTL	Qi et al. 2018	Multiple	cg00845626	GNL3	3	273	8.28444151345074e-38	1.35938658465784e-33	0.00000524285990843092	0.0851147384316111	0.91488001870848	10.7487849409721	rs3755798	rs7614498_PBRM1	0.112520028116884	3.825e-9	5e-8	5e-8	3.6641e-39	rs7614498	PBRM1
34002096	Bipolar disorder type I	EUR	Brain-mMeta_mQTL	EUR	mQTL	Qi et al. 2018	Multiple	cg11041457	GNL3	3	299	9.01987035035631e-13	2.22759792935358e-8	0.00000559669372749957	0.137356459186485	0.862637921842905	6.28028654023271	rs12635140	rs7614498_PBRM1	0.146985516709128	5.77e-9	5e-8	5e-8	7.41806e-13	rs7614498	PBRM1
34002096	Bipolar disorder type I	EUR	Brain-mMeta_mQTL	EUR	mQTL	Qi et al. 2018	Multiple	cg18595196	GNL3	3	273	2.05634852329841e-14	3.30548027861004e-10	0.00000596986357955986	0.0950577183876736	0.904936311418178	9.51986147750337	rs34157897	rs7614498_PBRM1	0.0890380359047228	3.683e-9	5e-8	5e-8	3.06818e-14	rs7614498	PBRM1
34002096	Bipolar disorder all type	EUR	Brain-mMeta_mQTL	EUR	mQTL	Qi et al. 2018	Multiple	cg00150837	GNL3	3	272	5.08907535845689e-15	6.57361748907647e-8	1.04566982972492e-9	0.0125195577332289	0.987480375484923	78.8750207097169	rs1108842	rs2336147_PBRM1	0.384041489192527	5.432e-13	5e-8	5e-8	1.16321e-11	rs2336147	PBRM1
35396580	Schizophrenia	EUR	Brain-mMeta_mQTL	EUR	mQTL	Qi et al. 2018	Multiple	cg00150837	GNL3	3	272	3.42223436554338e-20	2.09603642993975e-7	7.03178273897991e-15	0.0421100922516629	0.95788969814469	22.7472714241528	rs1108842	rs2710323_ITIH1	0.447262597277633	2.758e-18	5e-8	5e-8	1.16321e-11	rs2710323	ITIH1
30643256	Well being spectrum	EUR	Brain-mMeta_mQTL	EUR	mQTL	Qi et al. 2018	Multiple	cg00845626	GNL3	3	217	2.91151848318785e-36	3.30168276664899e-33	0.00018210323086479	0.20571225953586	0.794105637233275	3.86027375823386	rs3755798	rs13072536_ITIH4_AC006254.1	0.207331670650875	9.53e-9	5e-8	5e-8	3.6641e-39	rs13072536	ITIH4_AC006254.1
30643256	Well being spectrum	EUR	Brain-mMeta_mQTL	EUR	mQTL	Qi et al. 2018	Multiple	cg11041457	GNL3	3	243	3.42277969768461e-11	3.7765960611994e-8	0.00021211161733175	0.233271303383668	0.766516547198812	3.28594446072134	rs2289247	rs13072536_ITIH4_AC006254.1	0.167695836719135	1.251e-8	5e-8	5e-8	1.53351e-12	rs13072536	ITIH4_AC006254.1
30643256	Well being spectrum	EUR	Brain-mMeta_mQTL	EUR	mQTL	Qi et al. 2018	Multiple	cg18595196	GNL3	3	217	6.07165962833657e-13	6.85010962152826e-10	0.00017638970132531	0.198203077383959	0.801620532229098	4.04444039320439	rs3755798	rs13072536_ITIH4_AC006254.1	0.126203626817783	9.53e-9	5e-8	5e-8	3.34139e-14	rs13072536	ITIH4_AC006254.1
34002096	Bipolar disorder type I	EUR	BrainMeta_cis_eQTL	EUR	eQTL	Qi et al. 2022	Multiple	ENSG00000163938.17	GNL3	3	1398	1.03618308941032e-34	2.80768242393137e-30	0.00000641174851196305	0.172908172258902	0.827085415992583	4.78337955451959	rs2590838	rs7614498_PBRM1	0.281261293212892	5.894e-9	5e-8	5e-8	6.47607e-36	rs7614498	PBRM1
34002096	Bipolar disorder all type	EUR	BrainMeta_cis_eQTL	EUR	eQTL	Qi et al. 2022	Multiple	ENSG00000163938.17	GNL3	3	1438	1.37544845660715e-38	2.18237965968819e-31	8.5158690490085e-10	0.0125243788645931	0.987475620283818	78.8442789027606	rs2590838	rs2336147_PBRM1	0.337195368726855	3.736e-13	5e-8	5e-8	6.47607e-36	rs2336147	PBRM1
35396580	Schizophrenia	EUR	BrainMeta_cis_eQTL	EUR	eQTL	Qi et al. 2022	Multiple	ENSG00000163938.17	GNL3	3	1674	1.32040332695156e-43	1.28278351853919e-30	8.09278367066945e-15	0.0776998094325989	0.922300190567396	11.8700444351469	rs1108842	rs2710323_ITIH1	0.200591412951086	2.758e-18	5e-8	5e-8	1.40118e-35	rs2710323	ITIH1
35396580	Schizophrenia	EUR	BrainMeta_cis_eQTL	EUR	eQTL	Qi et al. 2022	Multiple	ENSG00000163938.17	GNL3	3	487	1.66828312147015e-16	8.47451351963913e-9	1.38462464034961e-10	0.00603963009062149	0.9939603612964	164.573052717227	rs7629072	rs6445358_WDR82	0.343679382204215	5.149e-14	5e-8	5e-8	4.91929e-12	rs6445358	WDR82
29483656	Schizophrenia	EUR	BrainMeta_cis_eQTL	EUR	eQTL	Qi et al. 2022	Multiple	ENSG00000163938.17	GNL3	3	799	5.16039775868439e-35	5.67889582943967e-31	0.0000015117598498584	0.015652213750418	0.984346274489739	62.8886	rs2590838	rs2577831_PBRM1	0.618162145137076	7.87e-10	5e-8	5e-8	6.47607e-36	rs2577831	PBRM1
30643256	Well being spectrum	EUR	BrainMeta_cis_eQTL	EUR	eQTL	Qi et al. 2022	Multiple	ENSG00000163938.17	GNL3	3	394	4.1734761780609e-11	1.36238011313178e-7	0.000046357098380403	0.15047758632089	0.849475920300983	5.64519900318907	rs524986	rs352163_ALAS1	0.113014493269544	1.221e-9	5e-8	5e-8	3.14034e-11	rs352163	ALAS1
34002096	Bipolar disorder type I	EUR	GTEx-brain-std_eQTL		eQTL	Qi et al. 2018	Multiple	ENSG00000163938.12	GNL3	3	1271	3.16004610040665e-7	0.00856264088383358	0.00000630027148050567	0.169894207615744	0.821536535224332	4.83557707324803	rs7646741	rs7614498_PBRM1	0.185127748631786	5.396e-9	5e-8	5e-8	3.95358e-8	rs7614498	PBRM1
34002096	Bipolar disorder all type	EUR	GTEx-brain-std_eQTL		eQTL	Qi et al. 2018	Multiple	ENSG00000163938.12	GNL3	3	1304	5.54230893037565e-11	0.00087940586299515	1.11609889620705e-9	0.0167269026577826	0.9823936903077	58.7313569288104	rs2336147	rs2336147_PBRM1	0.171562445942069	3.615e-13	5e-8	5e-8	7.37959e-8	rs2336147	PBRM1
35396580	Schizophrenia	EUR	GTEx-brain-std_eQTL		eQTL	Qi et al. 2018	Multiple	ENSG00000163938.12	GNL3	3	1553	3.29215070731527e-16	0.00319837780799281	6.63364620343012e-15	0.0635136608249749	0.933287961367028	14.6942870123468	rs7646741	rs2710323_ITIH1	0.365517060364728	1.682e-18	5e-8	5e-8	3.95358e-8	rs2710323	ITIH1
29483656	Schizophrenia	EUR	GTEx-brain-std_eQTL		eQTL	Qi et al. 2018	Multiple	ENSG00000163938.12	GNL3	3	669	2.68606337897227e-7	0.00295776396815558	0.00000197216064871158	0.0207401859290063	0.976299809335851	47.0728571420587	rs13083798	rs2577831_PBRM1	0.389240128045764	8.25e-10	5e-8	5e-8	7.35059e-8	rs2577831	PBRM1
30643258	Automobile speeding propensity	EUR	Brain-mMeta_mQTL	EUR	mQTL	Qi et al. 2018	Multiple	cg00150837	GNL3	3	273	1.92912909140535e-9	5.70485157202837e-8	0.00039638286108756	0.0107330271806607	0.988870530980606	92.133422783313	rs1108842	rs13083798_PBRM1	0.435774542018379	7.759e-8	5e-8	5e-8	1.16321e-11	rs13083798	PBRM1
29942086	Intelligence	EUR	Brain-mMeta_mQTL	EUR	mQTL	Qi et al. 2018	Multiple	cg00845626	GNL3	3	265	2.43583967205316e-38	3.44874480644541e-33	0.00000133801761500423	0.188629724153033	0.811368937829353	4.30138432037944	rs2289247	rs4687625_NT5DC2	0.179020077144481	2.289e-10	5e-8	5e-8	3.67485e-39	rs4687625	NT5DC2
29942086	Intelligence	EUR	Brain-mMeta_mQTL	EUR	mQTL	Qi et al. 2018	Multiple	cg11041457	GNL3	3	286	2.58443589428614e-13	3.77060604822564e-8	0.00000143308313303239	0.208290356542837	0.791708172667711	3.80098332831308	rs1866268	rs4687625_NT5DC2	0.219396742054411	1.549e-10	5e-8	5e-8	1.69154e-12	rs4687625	NT5DC2
29942086	Intelligence	EUR	Brain-mMeta_mQTL	EUR	mQTL	Qi et al. 2018	Multiple	cg18595196	GNL3	3	265	4.46095379142062e-15	6.31802651575879e-10	0.00000113232499508549	0.15953015330807	0.840468713735126	5.26840033878793	rs6976	rs4687625_NT5DC2	0.158159069123196	4.917e-11	5e-8	5e-8	8.42619e-14	rs4687625	NT5DC2
29500382	Nervous	EUR	Brain-mMeta_mQTL	EUR	mQTL	Qi et al. 2018	Multiple	cg00150837	GNL3	3	272	1.44301520895319e-10	9.04521139356345e-8	0.0000296439479246417	0.0175992609737899	0.982371004481872	55.8188781872653	rs1108842	rs9879090_PBRM1	0.314113154514571	5.599e-9	5e-8	5e-8	1.16321e-11	rs9879090	PBRM1
29500382	Worry	EUR	Brain-mMeta_mQTL	EUR	mQTL	Qi et al. 2018	Multiple	cg00150837	GNL3	3	272	3.34013209135245e-9	3.27510886620847e-7	0.00068616533743469	0.0663477920203787	0.932965711791168	14.0617446848059	rs1108842	rs6798941_STIMATE-MUSTN1_STIMATE	0.382955168504754	1.231e-7	5e-8	5e-8	1.16321e-11	rs6798941	STIMATE-MUSTN1_STIMATE
29942085	Worry subcluster	EUR	Brain-mMeta_mQTL	EUR	mQTL	Qi et al. 2018	Multiple	cg00150837	GNL3	3	211	6.89204314530906e-12	9.96464217856761e-8	0.00000139184714224279	0.0191427250579684	0.980855783441577	51.2390885034043	rs1108842	rs353547_TWF2	0.39745598195581	2.644e-10	5e-8	5e-8	1.16321e-11	rs353547	TWF2
30643258	Automobile speeding propensity	EUR	BrainMeta_cis_eQTL	EUR	eQTL	Qi et al. 2022	Multiple	ENSG00000163938.17	GNL3	3	1887	5.76350092096948e-33	2.75288324518562e-31	0.00035680478760914	0.016058868430318	0.983584326782076	61.2486696089456	rs2590838	rs13083798_PBRM1	0.290157601249691	8.237e-8	5e-8	5e-8	6.47607e-36	rs13083798	PBRM1
30124842	Body mass index	EUR	BrainMeta_cis_eQTL	EUR	eQTL	Qi et al. 2022	Multiple	ENSG00000163938.17	GNL3	3	265	2.81486807948841e-35	2.21815383738473e-24	5.54425624685391e-13	0.0427322157799211	0.957267784219529	22.4015480299369	rs2710323	rs2710323_ITIH1	0.999976273979647	4.8e-18	5e-8	5e-8	5.02159e-28	rs2710323	ITIH1
29500382	Nervous	EUR	BrainMeta_cis_eQTL	EUR	eQTL	Qi et al. 2022	Multiple	ENSG00000163938.17	GNL3	3	1815	6.74367405842093e-34	6.27227946830657e-31	0.0000416037136705959	0.0377333163713414	0.962225079914985	25.500676125192	rs2590838	rs9879090_PBRM1	0.220930656374832	9.14e-9	5e-8	5e-8	6.47607e-36	rs9879090	PBRM1
25673412	Waist-to-hip ratio adjusted for body mass index	EUR	BrainMeta_cis_eQTL	EUR	eQTL	Qi et al. 2022	Multiple	ENSG00000163938.17	GNL3	3	479	8.763366119335e-36	5.9328392584449e-31	2.65323565321873e-7	0.0169795074487433	0.983020227227698	57.8945078468962	rs13083798	rs2276824_PBRM1	0.487449670320844	4.1e-11	5e-8	5e-8	4.61422e-35	rs2276824	PBRM1
29500382	Worry	EUR	BrainMeta_cis_eQTL	EUR	eQTL	Qi et al. 2022	Multiple	ENSG00000163938.17	GNL3	3	917	2.30055226550139e-10	4.95302145263025e-8	0.00025611113326377	0.0541944252929317	0.945549413813536	17.4473556773165	rs9311474	rs353547_TWF2	0.17082527451791	2.014e-8	5e-8	5e-8	1.14314e-11	rs353547	TWF2
29942085	Worry subcluster	EUR	BrainMeta_cis_eQTL	EUR	eQTL	Qi et al. 2022	Multiple	ENSG00000163938.17	GNL3	3	1563	2.43749036887742e-35	2.77218347693827e-30	0.0000013467838176894	0.15232346731695	0.847675185899233	5.56496776780572	rs2590838	rs353547_TWF2	0.27974529855476	3.765e-10	5e-8	5e-8	6.47607e-36	rs353547	TWF2
29942085	Worry subcluster	EUR	BrainMeta_cis_eQTL	EUR	eQTL	Qi et al. 2022	Multiple	ENSG00000163938.17	GNL3	3	1431	1.21368087098298e-34	3.39553540035212e-29	7.59357367713742e-7	0.211658347955753	0.788340892686881	3.72459154245919	rs7646741	rs9836178_STIMATE-MUSTN1_STIMATE	0.589217958399646	1.533e-10	5e-8	5e-8	4.10466e-35	rs9836178	STIMATE-MUSTN1_STIMATE
30643258	Automobile speeding propensity	EUR	GTEx-brain-std_eQTL		eQTL	Qi et al. 2018	Multiple	ENSG00000163938.12	GNL3	3	1439	0.0000206232050799728	0.00098628050825351	0.00041742542820619	0.0189832873867996	0.979592383471661	51.6028843430375	rs13083798	rs13083798_PBRM1	0.224453714516052	4.516e-8	5e-8	5e-8	7.35059e-8	rs13083798	PBRM1
29500382	Nervous	EUR	GTEx-brain-std_eQTL		eQTL	Qi et al. 2018	Multiple	ENSG00000163938.12	GNL3	3	1514	0.00000202870387942812	0.00188373006485097	0.0000411855391771814	0.0372815755660808	0.960791480126012	25.7712144816152	rs7646741	rs9879090_PBRM1	0.258591455670768	4.305e-9	5e-8	5e-8	3.95358e-8	rs9879090	PBRM1
30239722	Waist-to-hip ratio adjusted for body mass index	EUR	GTEx-brain-std_eQTL		eQTL	Qi et al. 2018	Multiple	ENSG00000163938.12	GNL3	3	1526	7.91984069469349e-34	0.00871999185498134	1.60818247740153e-32	0.176250882233408	0.815029125911615	4.62425558149705	rs2276824	rs2276824_PBRM1	0.992110833058411	8.897e-38	5e-8	5e-8	5.40023E-06	rs2276824	PBRM1
25673412	Waist-to-hip ratio adjusted for body mass index	EUR	GTEx-brain-std_eQTL		eQTL	Qi et al. 2018	Multiple	ENSG00000163938.12	GNL3	3	471	1.74671659177481e-8	0.00118175617044857	1.1979102372534e-7	0.00711285974777189	0.99170524682359	139.42426562456	rs13083798	rs2276824_PBRM1	0.75382232008922	4.1e-11	5e-8	5e-8	7.35059e-8	rs2276824	PBRM1
29942085	Worry subcluster	EUR	GTEx-brain-std_eQTL		eQTL	Qi et al. 2018	Multiple	ENSG00000163938.12	GNL3	3	1111	9.07541130654087e-8	0.0104737081980541	0.00000142833718530748	0.164015359855058	0.825509412855591	5.03312259037875	rs13081155	rs353547_TWF2	0.192681277710672	2.41e-10	5e-8	5e-8	7.38342e-8	rs353547	TWF2
29942085	Worry subcluster	EUR	GTEx-brain-std_eQTL		eQTL	Qi et al. 2018	Multiple	ENSG00000163938.12	GNL3	3	1266	1.45645998239539e-7	0.0406910236769436	7.01445780373669e-7	0.195207963621094	0.764100165610184	3.91428787758543	rs7646741	rs9836178_STIMATE-MUSTN1_STIMATE	0.864817271339088	1.533e-10	5e-8	5e-8	3.95358e-8	rs9836178	STIMATE-MUSTN1_STIMATE
30643256	Neuroticism	EUR	Muscle_Skeletal_eQTL	EUR	eQTL	GTEx v8	Muscle Skeletal	ENSG00000163938.16	GNL3	3	559	1.51431298362621e-8	0.00000264693767533299	0.00048648715499259	0.0841199480952105	0.91539090266899	10.8819717961893	rs4434138	rs352163_ALAS1	0.637988985448913	2.809e-8	5e-8	5e-8	1.25589e-10	rs352163	ALAS1
30952852	Sleep efficiency	EUR	Muscle_Skeletal_eQTL	EUR	eQTL	GTEx v8	Muscle Skeletal	ENSG00000163938.16	GNL3	3	1515	7.35934196565732e-14	7.65190884416051e-11	0.00020395019968079	0.211269609190127	0.788526440533599	3.73232308970658	rs7620039	rs13094687_PHF7	0.06266228324482	1.2e-7	5e-8	5e-8	3.89084e-16	rs13094687	PHF7
35396580	Schizophrenia	EUR	Muscle_Skeletal_eQTL	EUR	eQTL	GTEx v8	Muscle Skeletal	ENSG00000163938.16	GNL3	3	469	2.96821998532604e-11	0.0015077908582062	1.18974416011189e-9	0.0594974073896462	0.93899480053272	15.782112897513	rs6445358	rs6445358_WDR82	0.365288253482145	3.45e-14	5e-8	5e-8	2.35565E-06	rs6445358	WDR82
30038396	Cognitive performance	EUR	Muscle_Skeletal_eQTL	EUR	eQTL	GTEx v8	Muscle Skeletal	ENSG00000163938.16	GNL3	3	1666	3.10267538461555e-16	1.19160652631056e-11	0.00000388598439966909	0.148392638921243	0.851603475082444	5.73885255544529	rs7620039	rs4434138_STAB1	0.0681316537222102	1.25e-9	5e-8	5e-8	3.89084e-16	rs4434138	STAB1
30124842	Height	EUR	Muscle_Skeletal_eQTL	EUR	eQTL	GTEx v8	Muscle Skeletal	ENSG00000163938.16	GNL3	3	103	1.54011549116375e-42	2.64594529289843e-10	9.25914396181032e-34	0.158231941170274	0.841768058565126	5.31983651555721	rs2878628	rs11720159_PBRM1	0.246977991496656	5.4e-37	5e-8	5e-8	5.24724e-14	rs11720159	PBRM1
30643256	Depression symptoms	EUR	Nerve_Tibial_eQTL	EUR	eQTL	GTEx v8	Nerve Tibial	ENSG00000163938.16	GNL3	3	1262	1.08797807217103e-13	1.21716264141939e-11	0.00210776751241326	0.235041154400413	0.762851078074894	3.24560641314461	rs2268026	rs17304995_SFMBT1_AC096887.1	0.214470055652005	1.156e-7	5e-8	5e-8	2.72019e-16	rs17304995	SFMBT1_AC096887.1
30952852	Sleep efficiency	EUR	Nerve_Tibial_eQTL	EUR	eQTL	GTEx v8	Nerve Tibial	ENSG00000163938.16	GNL3	3	1515	1.81498496602487e-14	1.88439556245265e-11	0.00016847789262776	0.17409526815221	0.8257362539363	4.74301376884272	rs34017441	rs13094687_PHF7	0.0200927044427273	1e-7	5e-8	5e-8	1.18701e-16	rs13094687	PHF7
34002096	Bipolar disorder type I	EUR	Nerve_Tibial_eQTL	EUR	eQTL	GTEx v8	Nerve Tibial	ENSG00000163938.16	GNL3	3	1352	6.27046175605786e-17	1.66215789401793e-12	0.0000063812673677672	0.168321323797041	0.831672294933929	4.9409800028471	rs11720243	rs7614498_PBRM1	0.0192756060483772	1.891e-9	5e-8	5e-8	6.08466e-16	rs7614498	PBRM1
34910505	Cortical thickness	EUR	Nerve_Tibial_eQTL	EUR	eQTL	GTEx v8	Nerve Tibial	ENSG00000163938.16	GNL3	3	1002	0.00000183778622085041	0.00175113947069055	0.0000115700259666628	0.0100363307810918	0.98819912193603	98.4621913615851	rs17304995	rs4687699_AC096887.1	0.35114398086863	5.60294e-9	5e-8	5e-8	3.63554e-7	rs4687699	AC096887.1
30124842	Height	EUR	Nerve_Tibial_eQTL	EUR	eQTL	GTEx v8	Nerve Tibial	ENSG00000163938.16	GNL3	3	103	9.19234305638511e-45	1.57926058015111e-12	6.49226194411006e-35	0.0101639833103948	0.98983601668802	97.3866235765762	rs11720159	rs11720159_PBRM1	0.217955358253275	2.2e-37	5e-8	5e-8	6.08466e-16	rs11720159	PBRM1
30643256	Depression symptoms	EUR	Pituitary_eQTL	EUR	eQTL	GTEx v8	Pituitary	ENSG00000163938.16	GNL3	3	784	0.00000547340410988075	0.00043861816458649	0.00233230522159222	0.186091097809285	0.811132505400427	4.35879262871412	rs6445528	rs352139_TLR9_AC097637.1	0.122566317089569	1.654e-8	5e-8	5e-8	1.81018e-7	rs352139	TLR9_AC097637.1
30643256	Neuroticism	EUR	Pituitary_eQTL	EUR	eQTL	GTEx v8	Pituitary	ENSG00000163938.16	GNL3	3	559	0.00000437329748626095	0.00076442888669576	0.00092222775932248	0.160362507326098	0.837946462730397	5.22532652240481	rs9311474	rs352163_ALAS1	0.121066001059374	6.764e-8	5e-8	5e-8	4.89142e-8	rs352163	ALAS1
29483656	Schizophrenia	EUR	Pituitary_eQTL	EUR	eQTL	GTEx v8	Pituitary	ENSG00000163938.16	GNL3	3	764	6.07190250634164e-8	0.00066637069239166	0.0000209156451213091	0.228771565472183	0.77054108747128	3.36816809327195	rs2577831	rs2577831_PBRM1	0.477982071449201	6.54e-11	5e-8	5e-8	8.4295e-7	rs2577831	PBRM1
30643256	Well being spectrum	EUR	Pituitary_eQTL	EUR	eQTL	GTEx v8	Pituitary	ENSG00000163938.16	GNL3	3	392	6.02024200943408e-7	0.00196523448275287	0.0000485698585058684	0.157710096079838	0.840275497554703	5.32797530685244	rs352167	rs352163_ALAS1	0.15783187936947	5.469e-10	5e-8	5e-8	3.33707e-7	rs352163	ALAS1
35396580	Schizophrenia	EUR	Pituitary_eQTL	EUR	eQTL	GTEx v8	Pituitary	ENSG00000163938.16	GNL3	3	469	2.42153264639473e-12	0.00012300856422812	1.34288801569949e-10	0.00582752806024766	0.994049463238815	170.578237112181	rs6445358	rs6445358_WDR82	0.297683040117747	3.45e-14	5e-8	5e-8	5.53507e-8	rs6445358	WDR82
30643258	Automobile speeding propensity	EUR	Pituitary_eQTL	EUR	eQTL	GTEx v8	Pituitary	ENSG00000163938.16	GNL3	3	1748	0.00000614824062033965	0.00029021019911729	0.00306592583852673	0.143865530663106	0.852772185058628	5.92756431042254	rs67409736	rs13083798_PBRM1	0.173152708161013	2.036e-7	5e-8	5e-8	1.38101e-8	rs13083798	PBRM1
30124842	Body mass index	EUR	Pituitary_eQTL	EUR	eQTL	GTEx v8	Pituitary	ENSG00000163938.16	GNL3	3	265	1.8148493617912e-14	0.00143012566218166	1.62901811161718e-12	0.127497742086198	0.871072132249972	6.83205928196799	rs2710323	rs2710323_ITIH1	0.995166420592177	4.8e-18	5e-8	5e-8	1.06814E-06	rs2710323	ITIH1
34910505	Cortical thickness	EUR	Pituitary_eQTL	EUR	eQTL	GTEx v8	Pituitary	ENSG00000163938.16	GNL3	3	1425	1.38787456681892e-18	0.00089944444773248	2.70798923831724e-16	0.174673124231903	0.824427431320362	4.71982988193317	rs28661185	rs28661185_NT5DC2	0.198796833335341	2.88755e-21	5e-8	5e-8	2.0927e-7	rs28661185	NT5DC2
30124842	Height	EUR	Pituitary_eQTL	EUR	eQTL	GTEx v8	Pituitary	ENSG00000163938.16	GNL3	3	103	5.66180885608783e-36	0.00097270864282628	2.72983650370325e-34	0.0459459862570213	0.953081305100148	20.7435160879695	rs11720159	rs11720159_PBRM1	0.214747715216772	2.2e-37	5e-8	5e-8	5.20457e-7	rs11720159	PBRM1
29942086	Intelligence	EUR	Pituitary_eQTL	EUR	eQTL	GTEx v8	Pituitary	ENSG00000163938.16	GNL3	3	1803	6.51250190582882e-10	0.00033976901066751	3.09800417760253e-7	0.160789614366629	0.838870306171033	5.21719210208601	rs13081028	rs4687625_NT5DC2	0.224120339579914	2.228e-11	5e-8	5e-8	1.00077e-8	rs4687625	NT5DC2
25673412	Waist-to-hip ratio adjusted for body mass index	EUR	Pituitary_eQTL	EUR	eQTL	GTEx v8	Pituitary	ENSG00000163938.16	GNL3	3	478	6.92491809340403e-9	0.00046974104282675	0.00000145870391056656	0.0980474284825751	0.901481364845771	9.19433970678773	rs13083798	rs2276824_PBRM1	0.280120510765678	4.1e-11	5e-8	5e-8	3.28544e-7	rs2276824	PBRM1
29500382	Worry	EUR	Pituitary_eQTL	EUR	eQTL	GTEx v8	Pituitary	ENSG00000163938.16	GNL3	3	985	0.00000282080659615843	0.00060735963329055	0.00022811807449744	0.0481660584160076	0.950995643069609	19.7441035107318	rs9311474	rs353547_TWF2	0.206181879701432	2.014e-8	5e-8	5e-8	4.89142e-8	rs353547	TWF2
29942085	Worry subcluster	EUR	Pituitary_eQTL	EUR	eQTL	GTEx v8	Pituitary	ENSG00000163938.16	GNL3	3	1689	2.50747356987127e-9	0.00028806661315543	0.00000111664513305638	0.127411478184511	0.872299336049726	6.84631674068254	rs1010554	rs353547_TWF2	0.184367956018371	4.005e-11	5e-8	5e-8	2.19209e-8	rs353547	TWF2
34002096	Bipolar disorder type I	EUR	PsychENCODE_100HCP_eQTL	EUR	eQTL	PsychENCODE	Prefrontal Cortex	ENSG00000163938	GNL3	3	690	2.47525821100846e-75	3.83579417830692e-71	0.00000663830224589577	0.101972706104967	0.89802065559279	8.80648057597296	rs2336147	rs7614498_PBRM1	0.424131403060463	5.023e-9	5e-8	5e-8	2.94649e-80	rs7614498	PBRM1
34002096	Bipolar disorder all type	EUR	PsychENCODE_100HCP_eQTL	EUR	eQTL	PsychENCODE	Prefrontal Cortex	ENSG00000163938	GNL3	3	701	3.11289688405478e-79	3.03094167560805e-72	8.37819565406358e-10	0.00716478237227129	0.992835216789921	138.571580433808	rs2336147	rs2336147_PBRM1	0.48250814875745	3.615e-13	5e-8	5e-8	2.94649e-80	rs2336147	PBRM1
35396580	Schizophrenia	EUR	PsychENCODE_100HCP_eQTL	EUR	eQTL	PsychENCODE	Prefrontal Cortex	ENSG00000163938	GNL3	3	716	3.07907803592173e-84	1.17580165023887e-71	8.47612915662575e-15	0.031399031594745	0.968600968405243	30.8481159835309	rs13081155	rs2710323_ITIH1	0.487482874715152	2.952e-18	5e-8	5e-8	3.20393e-80	rs2710323	ITIH1
29483656	Schizophrenia	EUR	PsychENCODE_100HCP_eQTL	EUR	eQTL	PsychENCODE	Prefrontal Cortex	ENSG00000163938	GNL3	3	288	1.63889073744461e-75	1.98612522932265e-72	0.0000015344860883806	0.00086046219121454	0.99913800332269	1161.16432950111	rs2336147	rs2577831_PBRM1	1	7.36e-10	5e-8	5e-8	2.94649e-80	rs2577831	PBRM1
34002096	Bipolar disorder type I	EUR	PsychENCODE_50PEER_eQTL	EUR	eQTL	PsychENCODE	Prefrontal Cortex	ENSG00000163938	GNL3	3	306	1.33075383880912e-10	0.00000122096757818232	0.0000067951648586289	0.0614071002374595	0.938584883497027	15.2846312538378	rs13081155	rs7614498_PBRM1	0.28085696991658	5.799e-9	5e-8	5e-8	4.51106e-11	rs7614498	PBRM1
34002096	Bipolar disorder all type	EUR	PsychENCODE_50PEER_eQTL	EUR	eQTL	PsychENCODE	Prefrontal Cortex	ENSG00000163938	GNL3	3	311	1.73057006526617e-14	1.56926940002497e-7	8.84118870810429e-10	0.00702415530245631	0.992975686886469	141.365850287967	rs13081155	rs2336147_PBRM1	0.272269101548987	5.492e-13	5e-8	5e-8	4.51106e-11	rs2336147	PBRM1
35396580	Schizophrenia	EUR	PsychENCODE_50PEER_eQTL	EUR	eQTL	PsychENCODE	Prefrontal Cortex	ENSG00000163938	GNL3	3	301	1.32246174246051e-19	2.6676291612144e-7	6.73687289069969e-15	0.0126020151182695	0.987397718118806	78.3523673676084	rs13081155	rs2710323_ITIH1	0.316019220181656	2.952e-18	5e-8	5e-8	4.51106e-11	rs2710323	ITIH1
29483656	Schizophrenia	EUR	PsychENCODE_50PEER_eQTL	EUR	eQTL	PsychENCODE	Prefrontal Cortex	ENSG00000163938	GNL3	3	188	1.52604935885386e-11	0.00000348211913270873	6.09744615582834e-7	0.138268988589025	0.861726919531965	6.23225011136274	rs13081155	rs1080500_RFT1	0.342641074133211	5.71e-10	5e-8	5e-8	4.51106e-11	rs1080500	RFT1
29483656	Schizophrenia	EUR	PsychENCODE_50PEER_eQTL	EUR	eQTL	PsychENCODE	Prefrontal Cortex	ENSG00000163938	GNL3	3	123	1.41304812281577e-10	1.49581034348682e-7	0.00000154121982036302	0.00063212287045706	0.999366186187385	1580.96824667138	rs2336147	rs2577831_PBRM1	0.999628987579046	7.36e-10	5e-8	5e-8	7.25772e-11	rs2577831	PBRM1
23974872	Schizophrenia	EUR	PsychENCODE_50PEER_eQTL	EUR	eQTL	PsychENCODE	Prefrontal Cortex	ENSG00000163938	GNL3	3	237	1.928648346244e-10	5.18517716853993e-7	0.00000890959512048052	0.0229764605020621	0.977014111192235	42.5223942175319	rs7646741	rs2535627_ITIH4	0.377788361407806	3.781e-9	5e-8	5e-8	1.03582e-10	rs2535627	ITIH4
30038396	Cognitive performance	EUR	PsychENCODE_100HCP_eQTL	EUR	eQTL	PsychENCODE	Prefrontal Cortex	ENSG00000163938	GNL3	3	181	5.63285516354335e-12	1.5441976287157e-9	0.00012648825115116	0.0337094759062078	0.966164034292812	28.6614967548305	rs2581812	rs7647313_AC096887.1	0.990623874206668	3.73e-8	5e-8	5e-8	1.21438e-14	rs7647313	AC096887.1
29500382	Nervous	EUR	PsychENCODE_100HCP_eQTL	EUR	eQTL	PsychENCODE	Prefrontal Cortex	ENSG00000163938	GNL3	3	789	1.44082944279966e-74	6.6836134961209e-72	0.0000389898157259035	0.0171034509833669	0.982857559200917	57.4654530338201	rs13081155	rs9879090_PBRM1	0.496078759695325	4.717e-9	5e-8	5e-8	3.20393e-80	rs9879090	PBRM1
29942085	Worry subcluster	EUR	PsychENCODE_100HCP_eQTL	EUR	eQTL	PsychENCODE	Prefrontal Cortex	ENSG00000163938	GNL3	3	428	6.88734674507572e-76	2.44767554627402e-71	0.00000142595731012247	0.0497264393364101	0.950272134706272	19.1099975664349	rs13081155	rs353547_TWF2	0.487592963346095	2.41e-10	5e-8	5e-8	3.20393e-80	rs353547	TWF2
29942085	Worry subcluster	EUR	PsychENCODE_100HCP_eQTL	EUR	eQTL	PsychENCODE	Prefrontal Cortex	ENSG00000163938	GNL3	3	453	4.67160270909937e-75	8.02382076165589e-70	7.04280613232659e-7	0.12008545411404	0.87991384160536	7.32739737795173	rs7646741	rs9836178_STIMATE-MUSTN1_STIMATE	0.999999999999972	1.533e-10	5e-8	5e-8	3.03321e-79	rs9836178	STIMATE-MUSTN1_STIMATE
30038396	Cognitive performance	EUR	PsychENCODE_50PEER_eQTL	EUR	eQTL	PsychENCODE	Prefrontal Cortex	ENSG00000163938	GNL3	3	301	2.10044800752187e-9	0.00000279123741489667	0.00010829686407426	0.143056398302873	0.856832511495189	5.98947353393548	rs13081155	rs4434138_STAB1	0.378431811303801	2.79e-8	5e-8	5e-8	4.51106e-11	rs4434138	STAB1
29500382	Nervous	EUR	PsychENCODE_50PEER_eQTL	EUR	eQTL	PsychENCODE	Prefrontal Cortex	ENSG00000163938	GNL3	3	317	6.96202854208136e-10	2.62870335051909e-7	0.0000355328353248978	0.0124288536676413	0.987535349930494	79.4550628994495	rs13081155	rs9879090_PBRM1	0.37413895870823	4.717e-9	5e-8	5e-8	4.51106e-11	rs9879090	PBRM1
29942085	Worry subcluster	EUR	PsychENCODE_50PEER_eQTL	EUR	eQTL	PsychENCODE	Prefrontal Cortex	ENSG00000163938	GNL3	3	170	3.19766053145618e-11	3.69384790863653e-7	0.00000140917747858063	0.0152937191482428	0.984704502257513	64.3862027746635	rs13081155	rs353547_TWF2	0.436581387094457	2.41e-10	5e-8	5e-8	4.51106e-11	rs353547	TWF2
29942085	Worry subcluster	EUR	PsychENCODE_50PEER_eQTL	EUR	eQTL	PsychENCODE	Prefrontal Cortex	ENSG00000163938	GNL3	3	149	1.05382989109324e-10	4.4544185926097e-7	8.06780609883654e-7	0.00241258333189086	0.997586164340255	413.492935623658	rs7646741	rs9836178_STIMATE-MUSTN1_STIMATE	0.989901587069998	1.533e-10	5e-8	5e-8	1.03582e-10	rs9836178	STIMATE-MUSTN1_STIMATE
31844048	Household income	EUR	PsychENCODE_100HCP_eQTL	EUR	eQTL	PsychENCODE	Prefrontal Cortex	ENSG00000215032	GNL3LP1	5	155	2.21117685188361e-16	0.0010070084727468	3.64481820838227e-14	0.165157537616776	0.83383545391044	5.04872781432014	rs12519587	rs6449503_ELOVL7	0.638793312198227	3.062e-18	5e-8	5e-8	2.10839e-8	rs6449503	ELOVL7
31844048	Household income	EUR	PsychENCODE_50PEER_eQTL	EUR	eQTL	PsychENCODE	Prefrontal Cortex	ENSG00000215032	GNL3LP1	5	128	7.36553722797491e-17	0.00033341454297227	5.31852606879044e-14	0.239993157441794	0.759673428015179	3.16539619759544	rs12519587	rs6449503_ELOVL7	0.793004895382151	3.062e-18	5e-8	5e-8	5.44719e-9	rs6449503	ELOVL7
34910505	Cortical thickness	EUR	PsychENCODE_100HCP_eQTL	EUR	eQTL	PsychENCODE	Prefrontal Cortex	ENSG00000215032	GNL3LP1	5	557	5.47433829429532e-51	1.98033678411378e-9	6.43612426603977e-43	0.232058254702157	0.767941743317504	3.30926277241525	rs4700404	rs72759206_NDUFAF2	0.0862112897093341	7.34244e-48	5e-8	5e-8	1.39402e-12	rs72759206	NDUFAF2
34910505	Cortical thickness	EUR	PsychENCODE_50PEER_eQTL	EUR	eQTL	PsychENCODE	Prefrontal Cortex	ENSG00000215032	GNL3LP1	5	420	2.85642125350491e-52	1.03330773056806e-10	6.00306322920907e-43	0.216376630364727	0.783623369531944	3.62157118451774	rs7734205	rs72759206_NDUFAF2	0.091176007882986	7.80061e-48	5e-8	5e-8	4.90911e-14	rs72759206	NDUFAF2
30643256	Neuroticism	EUR	LBC_BSGS_mQTL	EUR	mQTL	McRae et al. 2018	Whole Blood	cg18595196	GNL3	3	545	0.0000111473969861149	0.00194803170009375	0.0007778087648361	0.135061560157911	0.862201451980172	6.38376641712199	rs2015971	rs352163_ALAS1	0.378207711044997	6.027e-8	5e-8	5e-8	1.91518e-7	rs352163	ALAS1
34002096	Bipolar disorder type I	EUR	LBC_BSGS_mQTL	EUR	mQTL	McRae et al. 2018	Whole Blood	cg18595196	GNL3	3	1355	1.69061613232832e-14	4.54290573283082e-10	0.00000439362626584125	0.117179644045044	0.882815961874383	7.53386792619911	rs2083180	rs7614498_PBRM1	0.0434326931061629	8e-9	5e-8	5e-8	2.23799e-14	rs7614498	PBRM1
29483656	Schizophrenia	EUR	US_Blood_mQTL	EUR	mQTL	Hannon et al. 2018	Whole Blood	cg08332332	GNL3	3	127	1.14642933368719e-8	0.00000215347142457214	0.00053976191960312	0.10049078572938	0.8989672874153	8.94576831985574	rs2230534	rs1080500_RFT1	0.0570246489450152	1.07e-7	5e-8	5e-8	1.32374e-9	rs1080500	RFT1
29483656	Schizophrenia	EUR	US_Blood_mQTL	EUR	mQTL	Hannon et al. 2018	Whole Blood	cg08332332	GNL3	3	103	1.36865526789108e-8	0.00000195365554828167	0.00065221731285582	0.0921921096251798	0.907153705719862	9.83981936640809	rs6805539	rs2577831_PBRM1	0.21135794325024	1.6e-8	5e-8	5e-8	2.32876e-9	rs2577831	PBRM1
34002096	Bipolar disorder type I	EUR	US_Blood_mQTL	EUR	mQTL	Hannon et al. 2018	Whole Blood	cg08332332	GNL3	3	216	8.53148633234575e-11	0.00000204496512775308	0.00000765927026444893	0.182772604582318	0.817217691096976	4.47122637971116	rs12629701	rs7614498_PBRM1	0.0207777281851334	2.321e-9	5e-8	5e-8	1.51912e-9	rs7614498	PBRM1
34002096	Bipolar disorder all type	EUR	US_Blood_mQTL	EUR	mQTL	Hannon et al. 2018	Whole Blood	cg08332332	GNL3	3	218	4.25158221682796e-12	0.00000192582761786926	3.86042522877034e-7	0.17403867121084	0.825959016914766	4.74584	rs11718509	rs2336147_PBRM1	0.0161444332569963	1.237e-10	5e-8	5e-8	1.25837e-9	rs2336147	PBRM1
30643256	Well being spectrum	EUR	US_Blood_mQTL	EUR	mQTL	Hannon et al. 2018	Whole Blood	cg08332332	GNL3	3	216	1.68522212185932e-9	0.00000189337919554573	0.00015137232915907	0.169239091238969	0.830607641367453	4.90789471443461	rs2268026	rs13072536_ITIH4_AC006254.1	0.0249793895102538	4.302e-9	5e-8	5e-8	1.53926e-9	rs13072536	ITIH4_AC006254.1
35396580	Schizophrenia	EUR	US_Blood_mQTL	EUR	mQTL	Hannon et al. 2018	Whole Blood	cg08332332	GNL3	3	218	3.36660063700412e-14	0.0000018328230543963	3.05686433225829e-9	0.165585428118971	0.834412736001077	5.03916767000512	rs2336545	rs2710323_ITIH1	0.0328726788355921	3.844e-13	5e-8	5e-8	1.32374e-9	rs2710323	ITIH1
34002096	Bipolar disorder type I	EUR	eQTLGen_eQTL	EUR	eQTL	eQTLGen	Whole Blood	ENSG00000163938	GNL3	3	1368	1.16064116992222e-66	2.41563928513136e-62	0.00000834816822651107	0.172923127914455	0.827068523917329	4.78286816744653	rs2590838	rs7614498_PBRM1	0.447560467723056	5.894e-9	5e-8	5e-8	4.9534e-68	rs7614498	PBRM1
34002096	Bipolar disorder all type	EUR	eQTLGen_eQTL	EUR	eQTL	eQTLGen	Whole Blood	ENSG00000163938	GNL3	3	1404	1.59510043312811e-70	1.8385786928548e-63	1.14731125476488e-9	0.0122366203861746	0.987763378466527	80.7219107313761	rs2590838	rs2336147_PBRM1	0.522153336940563	3.736e-13	5e-8	5e-8	4.9534e-68	rs2336147	PBRM1
35396580	Schizophrenia	EUR	eQTLGen_eQTL	EUR	eQTL	eQTLGen	Whole Blood	ENSG00000163938	GNL3	3	1645	1.79075201586653e-75	1.1125797857925e-62	1.28803798157552e-14	0.0791038649114836	0.920896135088505	11.6416073490085	rs1108842	rs2710323_ITIH1	0.403900729684288	2.758e-18	5e-8	5e-8	8.484e-68	rs2710323	ITIH1
35396580	Schizophrenia	EUR	eQTLGen_eQTL	EUR	eQTL	eQTLGen	Whole Blood	ENSG00000163938	GNL3	3	440	1.30632791196169e-38	4.64728688844215e-31	1.8531103281888e-10	0.00559807401547978	0.994401925799214	177.632864990619	rs11717383	rs6445358_WDR82	0.508645569343602	7.756e-14	5e-8	5e-8	3.2872e-35	rs6445358	WDR82
29483656	Schizophrenia	EUR	eQTLGen_eQTL	EUR	eQTL	eQTLGen	Whole Blood	ENSG00000163938	GNL3	3	761	2.9627942985031e-67	3.25307246683454e-63	0.00000143558406898136	0.0147771249745132	0.985221439441419	66.672065177812	rs2590838	rs2577831_PBRM1	0.663513876303455	7.87e-10	5e-8	5e-8	4.9534e-68	rs2577831	PBRM1
34910505	Cortical thickness	EUR	LBC_BSGS_mQTL	EUR	mQTL	McRae et al. 2018	Whole Blood	cg18595196	GNL3	3	895	2.19850105607991e-7	0.00021662941863185	0.0000112211922296494	0.0100671029121859	0.989704826626846	98.3107886409745	rs4687699	rs4687699_AC096887.1	0.214208495342086	4.53866e-9	5e-8	5e-8	2.78807e-7	rs4687699	AC096887.1
30124842	Height	EUR	LBC_BSGS_mQTL	EUR	mQTL	McRae et al. 2018	Whole Blood	cg18595196	GNL3	3	102	2.67194652486893e-42	4.59511038597069e-10	4.67655389188551e-35	0.0070496062818639	0.99295039325862	140.851893504056	rs11720159	rs11720159_PBRM1	0.31036950725125	2.2e-37	5e-8	5e-8	2.13669e-13	rs11720159	PBRM1
30239722	Body mass index	EUR	US_Blood_mQTL	EUR	mQTL	Hannon et al. 2018	Whole Blood	cg08332332	GNL3	3	218	1.49285990908063e-10	0.00000224719069342917	0.000013555127860927	0.203247574514501	0.796736623017657	3.92003016479202	rs3774355	rs2710323_ITIH1	0.138813059387759	1.38e-11	5e-8	5e-8	5.33359e-9	rs2710323	ITIH1
30038396	Cognitive performance	EUR	US_Blood_mQTL	EUR	mQTL	Hannon et al. 2018	Whole Blood	cg08332332	GNL3	3	218	5.86292310532439e-11	0.00000184885880847915	0.00000532351842581118	0.167042933122405	0.832949894441732	4.98644198154355	rs7623199	rs4434138_STAB1	0.0303490768153703	3.77e-10	5e-8	5e-8	1.42335e-9	rs4434138	STAB1
34910505	Cortical thickness	EUR	US_Blood_mQTL	EUR	mQTL	Hannon et al. 2018	Whole Blood	cg08332332	GNL3	3	186	1.18588500835015e-18	0.00000206953575350099	9.25861755764652e-14	0.16073660757353	0.839261322890625	5.22134525270916	rs111464906	rs28661185_NT5DC2	0.036863102335465	6.00645e-18	5e-8	5e-8	2.67527e-9	rs28661185	NT5DC2
29942086	Intelligence	EUR	US_Blood_mQTL	EUR	mQTL	Hannon et al. 2018	Whole Blood	cg08332332	GNL3	3	203	1.08677125682956e-11	0.00000184664455972765	9.30942804429741e-7	0.157343390785811	0.842653831615958	5.3555082765634	rs2289249	rs4687625_NT5DC2	0.0579027549245554	3.044e-11	5e-8	5e-8	1.42335e-9	rs4687625	NT5DC2
30239722	Waist-to-hip ratio adjusted for body mass index	EUR	US_Blood_mQTL	EUR	mQTL	Hannon et al. 2018	Whole Blood	cg08332332	GNL3	3	218	4.20237554278251e-15	0.00000251317893540098	3.81574570095665e-10	0.227423397948352	0.772574088491132	3.39707389591719	rs2336146	rs2276824_PBRM1	0.186323757856329	2.659e-15	5e-8	5e-8	3.93285e-9	rs2276824	PBRM1
29942085	Worry subcluster	EUR	US_Blood_mQTL	EUR	mQTL	Hannon et al. 2018	Whole Blood	cg08332332	GNL3	3	186	1.7697199531968e-10	0.00000192365040928157	0.0000133900246354966	0.144691612943393	0.855293073204589	5.9111447844541	rs7623199	rs353547_TWF2	0.0314274685824667	8.786e-10	5e-8	5e-8	1.42335e-9	rs353547	TWF2
30643258	Automobile speeding propensity	EUR	eQTLGen_eQTL	EUR	eQTL	eQTLGen	Whole Blood	ENSG00000163938	GNL3	3	1945	4.53208503424372e-65	2.13418706812386e-63	0.00032598023668906	0.0143653036477106	0.985308716115603	68.5894806179491	rs2590838	rs13083798_PBRM1	0.37913416210728	8.237e-8	5e-8	5e-8	4.9534e-68	rs13083798	PBRM1
30124842	Body mass index	EUR	eQTLGen_eQTL	EUR	eQTL	eQTLGen	Whole Blood	ENSG00000163938	GNL3	3	259	7.53897480669729e-68	1.63506109347724e-57	9.20788242229629e-13	0.0189891451518227	0.981010854847262	51.6616649672141	rs2710323	rs2710323_ITIH1	0.99999996680748	4.8e-18	5e-8	5e-8	2.8806e-61	rs2710323	ITIH1
34910505	Cortical thickness	EUR	eQTLGen_eQTL	EUR	eQTL	eQTLGen	Whole Blood	ENSG00000163938	GNL3	3	1026	1.06260189051925e-25	1.04710824358567e-22	0.0000089567140902304	0.00783396043397013	0.992157082851936	126.648212129038	rs71301803	rs4687699_AC096887.1	0.453805602010809	6.04077e-9	5e-8	5e-8	1.0513e-26	rs4687699	AC096887.1
29500382	Nervous	EUR	eQTLGen_eQTL	EUR	eQTL	eQTLGen	Whole Blood	ENSG00000163938	GNL3	3	1918	2.90552733966129e-66	6.23768727907248e-63	0.0000208986478129351	0.0439098757039054	0.956069225648278	21.7734441357857	rs2590838	rs9879090_PBRM1	0.382760257098145	9.14e-9	5e-8	5e-8	4.9534e-68	rs9879090	PBRM1
25673412	Waist-to-hip ratio adjusted for body mass index	EUR	eQTLGen_eQTL	EUR	eQTL	eQTLGen	Whole Blood	ENSG00000163938	GNL3	3	468	4.55370357489034e-68	1.67694033242034e-63	2.95320605624276e-7	0.00988531978470994	0.990114384894685	100.160076401994	rs13083798	rs2276824_PBRM1	0.469674436484583	4.1e-11	5e-8	5e-8	1.1061e-67	rs2276824	PBRM1
29500382	Worry	EUR	eQTLGen_eQTL	EUR	eQTL	eQTLGen	Whole Blood	ENSG00000163938	GNL3	3	910	9.96663184834836e-34	4.27220985351957e-31	0.0000758758841459143	0.0315559293638469	0.968368194752009	30.6873609579521	rs9311474	rs353547_TWF2	0.741389760623628	2.014e-8	5e-8	5e-8	5.9366e-36	rs353547	TWF2
29942085	Worry subcluster	EUR	eQTLGen_eQTL	EUR	eQTL	eQTLGen	Whole Blood	ENSG00000163938	GNL3	3	1473	5.49155651960185e-66	1.53319060138422e-60	8.19672224575196e-7	0.228072800328831	0.771926379998947	3.38456132816363	rs11130324	rs9836178_STIMATE-MUSTN1_STIMATE	0.698734705085094	2.302e-10	5e-8	5e-8	1.3916e-66	rs9836178	STIMATE-MUSTN1_STIMATE
29942085	Worry subcluster	EUR	eQTLGen_eQTL	EUR	eQTL	eQTLGen	Whole Blood	ENSG00000163938	GNL3	3	1594	2.01086883022514e-67	2.32599217611613e-62	0.00000141634754751675	0.162993338368744	0.837005245283701	5.13521137526566	rs2590838	rs353547_TWF2	0.401839602413323	3.765e-10	5e-8	5e-8	4.9534e-68	rs353547	TWF2
29500382	Nervous	EUR	Esophagus_Gastroesophageal_Junction_eQTL	EUR	eQTL	GTEx v8	Esophagus_Gastroesophageal_Junction_eQTL	ENSG00000163938.16	GNL3	3	1689	4.54761129745712e-9	0.00000301944612731757	0.0000622817748379959	0.0403932593073487	0.959541434924075	23.7549891090246	rs9879090	rs353547_TWF2	0.35026414296404	1.595e-9	5e-8	5e-8	4.47958e-10	rs353547	TWF2
29500382	Nervous	EUR	Esophagus_Gastroesophageal_Junction_eQTL	EUR	eQTL	GTEx v8	Esophagus_Gastroesophageal_Junction_eQTL	ENSG00000163938.16	GNL3	3	2070	4.07358861913584e-9	0.0000037523521847515	0.0000776135306346601	0.0705637015561967	0.929354928487394	13.1704390216443	rs9879090	rs9879090_PBRM1	0.333806709740052	1.595e-9	5e-8	5e-8	4.47958e-10	rs9879090	PBRM1
29500382	Nervous	EUR	Esophagus_Muscularis_eQTL	EUR	eQTL	GTEx v8	Esophagus_Muscularis_eQTL	ENSG00000163938.16	GNL3	3	1689	2.36171920628101e-14	1.56809442249477e-11	0.0000539201619062212	0.0348358880472595	0.96511019177513	27.7044808062832	rs13081155	rs353547_TWF2	0.206655162224887	4.717e-9	5e-8	5e-8	1.38344e-15	rs353547	TWF2
29500382	Nervous	EUR	Esophagus_Muscularis_eQTL	EUR	eQTL	GTEx v8	Esophagus_Muscularis_eQTL	ENSG00000163938.16	GNL3	3	2070	1.95097534688412e-14	1.79712467058835e-11	0.0000509745532775726	0.0460008364594638	0.953948188969269	20.7376270170629	rs13081155	rs9879090_PBRM1	0.179408809958993	4.717e-9	5e-8	5e-8	1.38344e-15	rs9879090	PBRM1
29500382	Nervous	EUR	Heart_Atrial_Appendage_eQTL	EUR	eQTL	GTEx v8	Heart_Atrial_Appendage_eQTL	ENSG00000163938.16	GNL3	3	1689	2.76482097240411e-7	0.000183573912364059	0.000190075203093574	0.125328624994935	0.87429744940751	6.97603958746732	rs13081155	rs353547_TWF2	0.195413447198179	4.717e-9	5e-8	5e-8	4.08017e-8	rs353547	TWF2
29500382	Nervous	EUR	Heart_Atrial_Appendage_eQTL	EUR	eQTL	GTEx v8	Heart_Atrial_Appendage_eQTL	ENSG00000163938.16	GNL3	3	2070	2.0776336137012e-7	0.000191379487679801	0.000179062721299457	0.164106609687873	0.835522740339787	5.09134118320359	rs7646741	rs9879090_PBRM1	0.166184935529154	4.305e-9	5e-8	5e-8	4.25618e-8	rs9879090	PBRM1
34002096	Bipolar disorder type I	EUR	Artery_Coronary_eQTL	EUR	eQTL	GTEx v8	Artery_Coronary_eQTL	ENSG00000163938.16	GNL3	3	1352	4.0100940092018e-11	0.000001062985418372	0.00000468208630962776	0.123234781634585	0.876759473253587	7.11454559844435	rs11720243	rs7614498_PBRM1	0.022354021359591	1.891e-9	5e-8	5e-8	1.51399e-10	rs7614498	PBRM1
34002096	Bipolar disorder type I	EUR	Artery_Aorta_eQTL	EUR	eQTL	GTEx v8	Artery_Aorta_eQTL	ENSG00000163938.16	GNL3	3	1352	1.4442218114434e-11	3.8283060769558e-7	0.00000512295423275011	0.134932893157738	0.865061601042978	6.41105056594104	rs7652191	rs7614498_PBRM1	0.0306935538516705	2.046e-9	5e-8	5e-8	8.40845e-11	rs7614498	PBRM1
34002096	Bipolar disorder type I	EUR	Esophagus_Gastroesophageal_Junction_eQTL	EUR	eQTL	GTEx v8	Esophagus_Gastroesophageal_Junction_eQTL	ENSG00000163938.16	GNL3	3	1352	7.68781485860823e-10	0.0000203786621338355	0.0000135814193195642	0.359372180514355	0.640593858635412	1.78253602635172	rs2251219	rs7614498_PBRM1	0.0173246230567938	6.021e-9	5e-8	5e-8	3.50248e-9	rs7614498	PBRM1
34002096	Bipolar disorder type I	EUR	Heart_Left_Ventricle_eQTL	EUR	eQTL	GTEx v8	Heart_Left_Ventricle_eQTL	ENSG00000163938.16	GNL3	3	1352	5.50597599667807e-13	1.45950997281982e-8	0.00000829018662705142	0.21897311885575	0.781018576361971	3.56673266765895	rs11720243	rs7614498_PBRM1	0.0205845033866252	1.891e-9	5e-8	5e-8	4.81464e-12	rs7614498	PBRM1
34002096	Bipolar disorder type I	EUR	Pancreas_eQTL	EUR	eQTL	GTEx v8	Pancreas_eQTL	ENSG00000163938.16	GNL3	3	1352	2.42635240253853e-8	0.000643171261773911	0.0000149302947675586	0.395164240600325	0.604177633579611	1.52892790264058	rs2019065	rs7614498_PBRM1	0.251745704952155	1.474e-8	5e-8	5e-8	3.04086e-9	rs7614498	PBRM1
34002096	Bipolar disorder type I	EUR	Colon_Transverse_eQTL	EUR	eQTL	GTEx v8	Colon_Transverse_eQTL	ENSG00000163938.16	GNL3	3	1352	7.65447614026433e-11	0.00000202902887156926	0.00000617551174929033	0.162861748967826	0.837130046415008	5.14012683592381	rs1570	rs7614498_PBRM1	0.020157732858512	2.27e-9	5e-8	5e-8	7.40725e-10	rs7614498	PBRM1
34002096	Bipolar disorder type I	EUR	Artery_Tibial_eQTL	EUR	eQTL	GTEx v8	Artery_Tibial_eQTL	ENSG00000163938.16	GNL3	3	1352	8.99265953511287e-17	2.38375108819746e-12	0.0000039241814501468	0.103124322038191	0.896871753777974	8.69699539402378	rs1570	rs7614498_PBRM1	0.0443699499406469	2.27e-9	5e-8	5e-8	2.84397e-16	rs7614498	PBRM1
34002096	Bipolar disorder type I	EUR	Heart_Atrial_Appendage_eQTL	EUR	eQTL	GTEx v8	Heart_Atrial_Appendage_eQTL	ENSG00000163938.16	GNL3	3	1352	6.49038402274394e-9	0.000172045432350966	0.00000546409064764515	0.143984873599416	0.855837610387201	5.94394111681653	rs1570	rs7614498_PBRM1	0.0240091961881137	2.27e-9	5e-8	5e-8	9.10549e-8	rs7614498	PBRM1
34002096	Bipolar disorder type I	EUR	Esophagus_Muscularis_eQTL	EUR	eQTL	GTEx v8	Esophagus_Muscularis_eQTL	ENSG00000163938.16	GNL3	3	1352	2.51769253005318e-15	6.6738346813055e-11	0.00000640936927487776	0.169066987623582	0.830926602940401	4.91477735908097	rs3774349	rs7614498_PBRM1	0.124367264059953	4.565e-9	5e-8	5e-8	1.38344e-15	rs7614498	PBRM1
34910505	Cortical thickness	EUR	Stomach_eQTL	EUR	eQTL	GTEx v8	Stomach_eQTL	ENSG00000163938.16	GNL3	3	1424	2.44765817680102e-19	0.000158626190702284	2.41824839414201e-16	0.155876256100438	0.843965117708859	5.41432761359789	rs28661185	rs28661185_NT5DC2	0.243714612415666	2.88755e-21	5e-8	5e-8	3.75865e-8	rs28661185	NT5DC2
34910505	Cortical thickness	EUR	Breast_Mammary_Tissue_eQTL	EUR	eQTL	GTEx v8	Breast_Mammary_Tissue_eQTL	ENSG00000163938.16	GNL3	3	1424	2.14030328532417e-19	0.000138707340884617	3.42970115881628e-16	0.221491404227362	0.778369888431752	3.51422165183779	rs28661185	rs28661185_NT5DC2	0.267720283466795	2.88755e-21	5e-8	5e-8	5.03545e-8	rs28661185	NT5DC2
31768069	Impedance of leg (left)	EUR	PsychENCODE_50PEER_eQTL	EUR	eQTL	PsychENCODE_50PEER	PsychENCODE_50PEER_eQTL	ENSG00000163938	GNL3	3	319	5.0324450382935e-22	1.36874033078417e-7	2.57615348623132e-17	0.00601271664872356	0.993987146477241	165.314150748856	rs13081155	rs772585020_GNL3	0.37730392119492	2.55322e-21	5e-8	5e-8	4.51106e-11	rs772585020	GNL3
31768069	Impedance of leg (left)	EUR	ROSMAP_CMC_eQTL	EUR	eQTL	Brain xQTLServe	ROSMAP_CMC_eQTL	ENSG00000163938	GNL3	3	1774	5.48575357449909e-54	1.33612563468017e-38	2.42840722665259e-17	0.0582051774741535	0.941794822525846	16.1806021971853	rs11130324	rs772585020_GNL3	0.25064729083842	2.69674e-21	5e-8	5e-8	1.67693196e-40	rs772585020	GNL3
31768069	Impedance of leg (left)	EUR	PsychENCODE_100HCP_eQTL	EUR	eQTL	PsychENCODE_100HCP	PsychENCODE_100HCP_eQTL	ENSG00000163938	GNL3	3	775	8.62818766259614e-87	3.24203554434572e-72	2.32530393284841e-17	0.00774505849731155	0.992254941502675	128.114583233568	rs2336147	rs772585020_GNL3	0.427001073999958	2.5919e-21	5e-8	5e-8	2.94649e-80	rs772585020	GNL3
31768069	Impedance of leg (left)	EUR	BrainMeta_cis_eQTL	EUR	eQTL	BrainMeta (6 cohorts)	BrainMeta_cis_eQTL	ENSG00000163938.17	GNL3	3	1950	3.48913028029048e-46	1.01634605405073e-30	2.21480773208353e-17	0.0635785412441204	0.936421458755878	14.7285772908871	rs2590838	rs772585020_GNL3	0.347863381682223	2.35567e-21	5e-8	5e-8	6.47607e-36	rs772585020	GNL3
31768069	Impedance of leg (left)	EUR	Testis_eQTL	EUR	eQTL	GTEx v8	Testis_eQTL	ENSG00000163938.16	GNL3	3	1836	2.55382244469276e-30	7.17524296232682e-15	1.16097671689567e-16	0.325514597736335	0.674485402263659	2.07205884760348	rs2577831	rs772585020_GNL3	0.729597173517791	1.11295e-22	5e-8	5e-8	1.8951e-18	rs772585020	GNL3
31768069	Impedance of leg (left)	EUR	eQTLGen_eQTL	EUR	eQTL	eQTLGen	eQTLGen_eQTL	ENSG00000163938	GNL3	3	1790	3.08748539623644e-78	7.51601377751022e-63	2.22074214166946e-17	0.0531137047392147	0.94688629526079	17.8275324590885	rs2590838	rs772585020_GNL3	0.511892443003959	2.35567e-21	5e-8	5e-8	4.9534e-68	rs772585020	GNL3
31768069	Frequency of stair climbing in last 4 weeks	EUR	PsychENCODE_50PEER_eQTL	EUR	eQTL	PsychENCODE_50PEER	PsychENCODE_50PEER_eQTL	ENSG00000215032	GNL3LP1	5	446	1.28498186390186e-14	6.36494885411356e-11	0.000027480563476494	0.135255788876472	0.864716730496391	6.39319571960155	rs17444495	rs6449503_ELOVL7	0.1777956898367	3.01297e-9	5e-8	5e-8	1.73861e-15	rs6449503	ELOVL7
31768069	Frequency of stair climbing in last 4 weeks	EUR	PsychENCODE_100HCP_eQTL	EUR	eQTL	PsychENCODE_100HCP	PsychENCODE_100HCP_eQTL	ENSG00000215032	GNL3LP1	5	604	2.2539121447951e-13	1.14576454986176e-9	0.0000287400032131715	0.145243588186978	0.854727670663817	5.88478762700002	rs17444495	rs6449503_ELOVL7	0.199832770857519	3.01297e-9	5e-8	5e-8	3.52702e-14	rs6449503	ELOVL7
34737426	Nervous feelings	EUR	Testis_eQTL	EUR	eQTL	GTEx v8	Testis_eQTL	ENSG00000163938.16	GNL3	3	1981	3.94386937278663e-21	7.15584015264609e-15	1.95711286890519e-7	0.354457163021542	0.645542641267163	1.82121482822998	rs2577831	rs2710323_ITIH1	0.176448150878341	2.04402e-12	5e-8	5e-8	1.8951e-18	rs2710323	ITIH1
34737426	Nervous feelings	EUR	eQTLGen_eQTL	EUR	eQTL	eQTLGen	eQTLGen_eQTL	ENSG00000163938	GNL3	3	1987	2.0684458073869e-69	3.71363004746671e-63	1.48777538440277e-8	0.0257368421306784	0.974263142991571	37.8548051095299	rs1108842	rs2710323_ITIH1	0.404380040096715	2.69365e-12	5e-8	5e-8	8.484e-68	rs2710323	ITIH1
34737426	Nervous feelings	EUR	ROSMAP_CMC_eQTL	EUR	eQTL	Brain xQTLServe	ROSMAP_CMC_eQTL	ENSG00000163938	GNL3	3	1969	1.79549101576577e-45	3.00413988385166e-39	9.5093344879539e-9	0.0149255431794581	0.985074447311214	65.9992360389913	rs7646741	rs2710323_ITIH1	0.322168088331537	1.87087e-12	5e-8	5e-8	1.67693196e-40	rs2710323	ITIH1
34737426	Nervous feelings	EUR	Pituitary_eQTL	EUR	eQTL	GTEx v8	Pituitary_eQTL	ENSG00000163938.16	GNL3	3	1981	4.0525877458484e-10	0.000735310107225311	2.02403664775966e-7	0.366612846255366	0.632651640828484	1.72566686435152	rs7646741	rs2710323_ITIH1	0.136635981335703	1.87087e-12	5e-8	5e-8	4.19834e-7	rs2710323	ITIH1
34737426	Nervous feelings	EUR	PsychENCODE_50PEER_eQTL	EUR	eQTL	PsychENCODE_50PEER	PsychENCODE_50PEER_eQTL	ENSG00000163938	GNL3	3	310	1.81208872879672e-13	1.4695658713677e-7	9.25203969988011e-9	0.00650971960689288	0.9934901241843	152.616423468122	rs13081155	rs2710323_ITIH1	0.406684042924864	2.02619e-12	5e-8	5e-8	4.51106e-11	rs2710323	ITIH1
34737426	Nervous feelings	EUR	PsychENCODE_100HCP_eQTL	EUR	eQTL	PsychENCODE_100HCP	PsychENCODE_100HCP_eQTL	ENSG00000163938	GNL3	3	789	3.72029451214743e-78	3.27875034467189e-72	1.02334482474689e-8	0.00802691558073485	0.99197307418583	123.580852970054	rs13081155	rs2710323_ITIH1	0.541846855896904	2.02619e-12	5e-8	5e-8	3.20393e-80	rs2710323	ITIH1
34737426	Nervous feelings	EUR	BrainMeta_cis_eQTL	EUR	eQTL	BrainMeta (6 cohorts)	BrainMeta_cis_eQTL	ENSG00000163938.17	GNL3	3	2077	1.90270398629074e-37	3.46606062925784e-31	1.18282936120096e-8	0.0205675781051171	0.979432410066594	47.6202110457972	rs2590838	rs2710323_ITIH1	0.190551481226174	5.35079e-12	5e-8	5e-8	6.47607e-36	rs2710323	ITIH1
30643258	Automobile speeding propensity	EUR	Testis_eQTL	EUR	eQTL	GTEx v8	Testis_eQTL	ENSG00000163938.16	GNL3	3	1748	1.72439821423307e-16	8.13953096524125e-15	0.00685805663136497	0.323044946614564	0.67009699675406	2.07431505670193	rs2590838	rs13083798_PBRM1	0.279803009952398	8.237e-8	5e-8	5e-8	8.50042e-19	rs13083798	PBRM1
30643258	Automobile speeding propensity	EUR	Esophagus_Muscularis_eQTL	EUR	eQTL	GTEx v8	Esophagus_Muscularis_eQTL	ENSG00000163938.16	GNL3	3	1748	1.90506667924336e-13	8.99232503174862e-12	0.000495305023044308	0.0224023615225978	0.977102333445173	43.6160416596949	rs1108842	rs13083798_PBRM1	0.150333343593765	7.759e-8	5e-8	5e-8	1.38344e-15	rs13083798	PBRM1
30643258	Automobile speeding propensity	EUR	Heart_Atrial_Appendage_eQTL	EUR	eQTL	GTEx v8	Heart_Atrial_Appendage_eQTL	ENSG00000163938.16	GNL3	3	1748	0.00000201834624905553	0.0000952702899896739	0.00173475268401475	0.0809668618303057	0.917201096849442	11.328104808752	rs13083798	rs13083798_PBRM1	0.258372516307022	4.516e-8	5e-8	5e-8	3.35323e-8	rs13083798	PBRM1
34002096	Bipolar disorder all type	EUR	Esophagus_Gastroesophageal_Junction_eQTL	EUR	eQTL	GTEx v8	Esophagus_Gastroesophageal_Junction_eQTL	ENSG00000163938.16	GNL3	3	1392	1.32460877096855e-12	0.0000207141728356773	2.4853216489332e-8	0.388041552412976	0.611937708559647	1.57699015673555	rs2336147	rs2336147_PBRM1	0.153716959123771	3.615e-13	5e-8	5e-8	9.81284e-9	rs2336147	PBRM1
34002096	Bipolar disorder all type	EUR	Testis_eQTL	EUR	eQTL	GTEx v8	Testis_eQTL	ENSG00000163938.16	GNL3	3	1392	4.39050269247237e-22	6.86584851320889e-15	1.66118079751428e-8	0.259033745399001	0.740966237989182	2.86050080790763	rs2590838	rs2336147_PBRM1	0.299970474317505	3.736e-13	5e-8	5e-8	8.50042e-19	rs2336147	PBRM1
34002096	Bipolar disorder all type	EUR	Heart_Atrial_Appendage_eQTL	EUR	eQTL	GTEx v8	Heart_Atrial_Appendage_eQTL	ENSG00000163938.16	GNL3	3	1392	5.66757779145008e-12	0.0000886293285268682	4.85556663750755e-9	0.0750062292095326	0.924905136600708	12.3310443192252	rs2336147	rs2336147_PBRM1	0.169056189216948	3.615e-13	5e-8	5e-8	4.08017e-8	rs2336147	PBRM1
34002096	Bipolar disorder all type	EUR	Esophagus_Muscularis_eQTL	EUR	eQTL	GTEx v8	Esophagus_Muscularis_eQTL	ENSG00000163938.16	GNL3	3	1392	4.36426363629727e-19	6.82481599428191e-12	1.12056443643401e-9	0.0165398765175155	0.983460122355096	59.4599434471972	rs2336147	rs2336147_PBRM1	0.165332043446633	3.615e-13	5e-8	5e-8	1.38344e-15	rs2336147	PBRM1
30664745	Hip osteoarthritis	EUR	Breast_Mammary_Tissue_eQTL	EUR	eQTL	GTEx v8	Breast_Mammary_Tissue_eQTL	ENSG00000163938.16	GNL3	3	2227	1.0619672780065e-12	0.0000253717284242118	4.59228270238375e-9	0.108824235372735	0.891150388305496	8.18889639107691	rs3774355	rs3774355_ITIH1	0.511149419046416	8.201e-14	5e-8	5e-8	1.05372e-8	rs3774355	ITIH1
30664745	Hip osteoarthritis	EUR	Artery_Coronary_eQTL	EUR	eQTL	GTEx v8	Artery_Coronary_eQTL	ENSG00000163938.16	GNL3	3	2227	8.39975013782388e-14	0.00000200680551785136	1.17028795982646e-8	0.278875329232582	0.721122652258937	2.58582447663386	rs3774355	rs3774355_ITIH1	0.528019336790099	8.201e-14	5e-8	5e-8	4.2392e-10	rs3774355	ITIH1
31768069	Impedance of leg (right)	EUR	BrainMeta_cis_eQTL	EUR	eQTL	BrainMeta (6 cohorts)	BrainMeta_cis_eQTL	ENSG00000163938.17	GNL3	3	1950	9.34880205300708e-44	1.41726030925717e-30	5.93437258266969e-15	0.0890529935505822	0.910947006449415	10.2292687772702	rs2590838	rs772585020_GNL3	0.325234268608266	7.4229e-19	5e-8	5e-8	6.47607e-36	rs772585020	GNL3
31768069	Impedance of leg (right)	EUR	eQTLGen_eQTL	EUR	eQTL	eQTLGen	eQTLGen_eQTL	ENSG00000163938	GNL3	3	1790	8.10380876397986e-76	1.13496489510367e-62	5.82884364477888e-15	0.0807155752881312	0.919284424711857	11.3891825887417	rs2590838	rs772585020_GNL3	0.469687629002819	7.4229e-19	5e-8	5e-8	4.9534e-68	rs772585020	GNL3
31768069	Impedance of leg (right)	EUR	PsychENCODE_50PEER_eQTL	EUR	eQTL	PsychENCODE_50PEER	PsychENCODE_50PEER_eQTL	ENSG00000163938	GNL3	3	319	1.3480498157154e-19	1.37995948915147e-7	6.90078720372143e-15	0.00607020601123161	0.993929655992813	163.739031946158	rs13081155	rs772585020_GNL3	0.374730493266746	7.35315e-19	5e-8	5e-8	4.51106e-11	rs772585020	GNL3
31768069	Impedance of leg (right)	EUR	ROSMAP_CMC_eQTL	EUR	eQTL	Brain xQTLServe	ROSMAP_CMC_eQTL	ENSG00000163938	GNL3	3	1774	1.41513009938124e-51	1.98367093137365e-38	6.26445710987011e-15	0.0868994721474078	0.913100527852584	10.5075497616797	rs11130324	rs772585020_GNL3	0.262232474799355	7.32238e-19	5e-8	5e-8	1.67693196e-40	rs772585020	GNL3
31768069	Impedance of leg (right)	EUR	PsychENCODE_100HCP_eQTL	EUR	eQTL	PsychENCODE_100HCP	PsychENCODE_100HCP_eQTL	ENSG00000163938	GNL3	3	775	2.37789669368937e-84	5.66634780469391e-72	6.40845186725953e-15	0.0142851407948272	0.985714859205167	69.0028102181606	rs13081155	rs772585020_GNL3	0.421582957536548	7.35315e-19	5e-8	5e-8	3.20393e-80	rs772585020	GNL3
31768069	Standing height	EUR	PsychENCODE_100HCP_eQTL	EUR	eQTL	PsychENCODE_100HCP	PsychENCODE_100HCP_eQTL	ENSG00000163938	GNL3	3	265	9.47079157574589e-34	8.56982765824911e-10	4.08629984626513e-25	0.369125815765361	0.630874183377654	1.70910339085759	rs34933390	rs537160726_CACNA1D	0.282674846573894	2.05885e-30	5e-8	5e-8	1.52943e-14	rs537160726	CACNA1D
30643256	Neuroticism	EUR	Stomach_eQTL	EUR	eQTL	GTEx v8	Stomach_eQTL	ENSG00000163938.16	GNL3	3	779	6.71640648133344e-7	0.000162815705369393	0.00150790567916668	0.364905392022588	0.633423214952227	1.73585600213059	rs4434138	rs352163_ALAS1	0.154891242619709	2.809e-8	5e-8	5e-8	2.35564e-8	rs352163	ALAS1
34822786	Hip osteoarthritis	EUR	Artery_Coronary_eQTL	EUR	eQTL	GTEx v8	Artery_Coronary_eQTL	ENSG00000163938.16	GNL3	3	2241	1.22087819108622e-13	0.00000197792678774187	1.76173065267177e-8	0.284700092103357	0.715297912352427	2.51246112028916	rs6792369	rs2268023_ITIH1	0.37074923775795	3.04e-13	5e-8	5e-8	1.61938e-10	rs2268023	ITIH1
34822786	Hip osteoarthritis	EUR	Stomach_eQTL	EUR	eQTL	GTEx v8	Stomach_eQTL	ENSG00000163938.16	GNL3	3	2241	4.74625000289161e-12	0.0000768932977145488	1.49854947040266e-8	0.242019890841688	0.757903200870355	3.13157401333645	rs3774354	rs2268023_ITIH1	0.151934081328649	2.453e-13	5e-8	5e-8	4.23568e-8	rs2268023	ITIH1
34822786	Hip osteoarthritis	EUR	Muscle_Skeletal_eQTL	EUR	eQTL	GTEx v8	Muscle_Skeletal_eQTL	ENSG00000163938.16	GNL3	3	2241	1.74854090462349e-18	2.83278538347891e-11	2.29383963125608e-8	0.370992575043403	0.629007401989869	1.69547167329772	rs7620039	rs2268023_ITIH1	0.0485893112686305	2.842e-11	5e-8	5e-8	3.89084e-16	rs2268023	ITIH1
34822786	Hip osteoarthritis	EUR	Testis_eQTL	EUR	eQTL	GTEx v8	Testis_eQTL	ENSG00000163938.16	GNL3	3	2241	4.37538227996782e-22	7.08849243220554e-15	2.28395546078703e-8	0.369389652210891	0.63061032494955	1.70716835508301	rs2878726	rs2268023_ITIH1	0.0325462813881946	9.798e-12	5e-8	5e-8	4.14958e-19	rs2268023	ITIH1
34822786	Hip osteoarthritis	EUR	Breast_Mammary_Tissue_eQTL	EUR	eQTL	GTEx v8	Breast_Mammary_Tissue_eQTL	ENSG00000163938.16	GNL3	3	2241	2.60935300061751e-12	0.0000422737439023638	1.14962471957013e-8	0.185434485499854	0.814523229257386	4.39251214282917	rs3774355	rs2268023_ITIH1	0.328031931573939	2.263e-13	5e-8	5e-8	1.05372e-8	rs2268023	ITIH1
31768069	Interval between previous point and current one in alphanumeric path (trail #2)	EUR	Pituitary_eQTL	EUR	eQTL	GTEx v8	Pituitary_eQTL	ENSG00000163938.16	GNL3	3	1678	0.00000137392173073113	0.000100139799900011	0.000799598888742159	0.0573378854494638	0.941761001940164	16.4247599045174	rs13081028	rs7639267_NT5DC2	0.201030307246198	9.30689e-8	5e-8	5e-8	1.00077e-8	rs7639267	NT5DC2
30867560	Neuroticism	EUR	Esophagus_Muscularis_eQTL	EUR	eQTL	GTEx v8	Esophagus_Muscularis_eQTL	ENSG00000163938.16	GNL3	3	1914	2.28727424731654e-12	1.40420902036674e-10	0.00546845119284734	0.335061027422563	0.65947052124188	1.96821016850219	rs2577831	rs2071044_ITIH4	0.190214121483497	1.421e-06	5e-8	5e-8	1.64549e-15	rs2071044	ITIH4
34737426	Coffee type: Ground coffee (include espresso, filter etc)	EUR	PsychENCODE_50PEER_eQTL	EUR	eQTL	PsychENCODE_50PEER	PsychENCODE_50PEER_eQTL	ENSG00000215032	GNL3LP1	5	449	2.63116859936507e-16	6.35709759287975e-11	5.6304668074837e-7	0.135171406961934	0.864828029927812	6.39801012185481	rs17444495	rs57468227_ELOVL7	0.114531828419394	1.80213e-10	5e-8	5e-8	1.73861e-15	rs57468227	ELOVL7
34737426	Coffee type: Ground coffee (include espresso, filter etc)	EUR	PsychENCODE_100HCP_eQTL	EUR	eQTL	PsychENCODE_100HCP	PsychENCODE_100HCP_eQTL	ENSG00000215032	GNL3LP1	5	608	3.29395992112535e-15	7.9730584630247e-10	4.20176782171332e-7	0.100804958717207	0.899194620308699	8.92014273654189	rs12518404	rs57468227_ELOVL7	0.0899697841558709	1.14946e-10	5e-8	5e-8	5.52563e-14	rs57468227	ELOVL7
35396580	Schizophrenia	EUR	Heart_Atrial_Appendage_eQTL	EUR	eQTL	GTEx v8	Heart_Atrial_Appendage_eQTL	ENSG00000163938.16	GNL3	3	1629	3.16154754935645e-17	0.000299291251769394	2.72773830300631e-14	0.257482020695047	0.742218688053155	2.88260394279029	rs7646741	rs2710323_ITIH1	0.238424510689555	1.682e-18	5e-8	5e-8	4.25618e-8	rs2710323	ITIH1
35396580	Schizophrenia	EUR	Esophagus_Muscularis_eQTL	EUR	eQTL	GTEx v8	Esophagus_Muscularis_eQTL	ENSG00000163938.16	GNL3	3	1629	3.02984243936971e-24	2.86823247851382e-11	8.07961894666856e-15	0.0755621317821828	0.924437868189126	12.2341422401096	rs1108842	rs2710323_ITIH1	0.145066659940442	2.758e-18	5e-8	5e-8	1.38344e-15	rs2710323	ITIH1
30239722	Waist-to-hip ratio adjusted for body mass index	EUR	Esophagus_Gastroesophageal_Junction_eQTL	EUR	eQTL	GTEx v8	Esophagus_Gastroesophageal_Junction_eQTL	ENSG00000163938.16	GNL3	3	2169	1.09545947956906e-37	0.00000120697756408015	2.07879264967323e-33	0.0219260705646804	0.978072722457755	44.6077521994882	rs2276824	rs2276824_PBRM1	0.999916274930516	8.897e-38	5e-8	5e-8	4.47958e-10	rs2276824	PBRM1
30239722	Waist-to-hip ratio adjusted for body mass index	EUR	Heart_Atrial_Appendage_eQTL	EUR	eQTL	GTEx v8	Heart_Atrial_Appendage_eQTL	ENSG00000163938.16	GNL3	3	2169	4.11995626222144e-35	0.00045393689736922	3.54540977506618e-32	0.390023826946121	0.609522236156517	1.56278205085332	rs2276824	rs2276824_PBRM1	0.994890509419625	8.897e-38	5e-8	5e-8	8.05289e-7	rs2276824	PBRM1
31768069	Platelet distribution width	EUR	eQTLGen_eQTL	EUR	eQTL	eQTLGen	eQTLGen_eQTL	ENSG00000163938	GNL3	3	680	3.21310340189104e-34	1.31163774810728e-30	0.00000383342349132517	0.0146632856875149	0.985332880888994	67.1972777375509	rs11717383	rs62259688_IQCF6	0.69512408734551	6.94793e-10	5e-8	5e-8	3.2872e-35	rs62259688	IQCF6
31768069	Platelet distribution width	EUR	Brain_Cerebellum_eQTL	EUR	eQTL	GTEx v8	Brain_Cerebellum_eQTL	ENSG00000163938.16	GNL3	3	774	5.6708794216426e-8	0.000235281496293159	0.00000506539694342961	0.0200363146827052	0.979723281715262	48.8973794447805	rs1060330	rs62259688_IQCF6	0.333899590548279	7.1613e-10	5e-8	5e-8	1.26414e-8	rs62259688	IQCF6
31768069	Platelet distribution width	EUR	ROSMAP_CMC_eQTL	EUR	eQTL	Brain xQTLServe	ROSMAP_CMC_eQTL	ENSG00000163938	GNL3	3	746	1.10851281971409e-22	4.59741811045823e-19	0.0000040484213716598	0.0158061308700665	0.984189820708559	62.2663337915548	rs7614727	rs62259688_IQCF6	0.289963152650199	6.24061e-10	5e-8	5e-8	5.67135675e-23	rs62259688	IQCF6
31768069	Platelet distribution width	EUR	BrainMeta_cis_eQTL	EUR	eQTL	BrainMeta (6 cohorts)	BrainMeta_cis_eQTL	ENSG00000163938.17	GNL3	3	1359	9.71943701594708e-12	4.10656734666117e-8	0.00000532227076873451	0.0215086841511916	0.978485952502647	45.4925994367926	rs11717383	rs62259688_IQCF6	0.335010324283621	6.94793e-10	5e-8	5e-8	7.54677e-12	rs62259688	IQCF6
32242144	25 hydroxyvitamin D with BMI as covariate	EUR	ROSMAP_CMC_eQTL	EUR	eQTL	Brain xQTLServe	ROSMAP_CMC_eQTL	ENSG00000163938	GNL3	3	1774	2.62267300193312e-44	2.16760047440353e-39	1.15990744866247e-7	0.00859505880992335	0.991404825199337	115.345903631831	rs11130324	rs772585020_GNL3	0.323194662192443	1.3693e-11	5e-8	5e-8	1.67693196e-40	rs772585020	GNL3
32242144	25 hydroxyvitamin D with BMI as covariate	EUR	BrainMeta_cis_eQTL	EUR	eQTL	BrainMeta (6 cohorts)	BrainMeta_cis_eQTL	ENSG00000163938.17	GNL3	3	1951	2.75333390315456e-36	2.50192400277415e-31	1.74774227964978e-7	0.0148964370058061	0.985103388219962	66.1301348662101	rs2590838	rs772585020_GNL3	0.239949894893835	3.78316e-11	5e-8	5e-8	6.47607e-36	rs772585020	GNL3
32242144	25 hydroxyvitamin D with BMI as covariate	EUR	PsychENCODE_50PEER_eQTL	EUR	eQTL	PsychENCODE_50PEER	PsychENCODE_50PEER_eQTL	ENSG00000163938	GNL3	3	319	2.85000352100919e-12	1.60811260061505e-7	1.45894221408309e-7	0.00723931140589031	0.992760381885777	137.134642540451	rs13081155	rs772585020_GNL3	0.303139594385462	2.63778e-11	5e-8	5e-8	4.51106e-11	rs772585020	GNL3
32242144	25 hydroxyvitamin D with BMI as covariate	EUR	eQTLGen_eQTL	EUR	eQTL	eQTLGen	eQTLGen_eQTL	ENSG00000163938	GNL3	3	1791	3.33082433885117e-68	2.75724226587788e-63	2.39576905685181e-7	0.0188509258437048	0.981148834579376	52.0477796535935	rs2590838	rs772585020_GNL3	0.490146582020458	3.78316e-11	5e-8	5e-8	4.9534e-68	rs772585020	GNL3
32242144	25 hydroxyvitamin D with BMI as covariate	EUR	PsychENCODE_100HCP_eQTL	EUR	eQTL	PsychENCODE_100HCP	PsychENCODE_100HCP_eQTL	ENSG00000163938	GNL3	3	775	6.17514853579839e-77	3.862235257286e-72	1.66420779632118e-7	0.00941817529572342	0.990581658283488	105.177662039619	rs13081155	rs772585020_GNL3	0.416301199930523	2.63778e-11	5e-8	5e-8	3.20393e-80	rs772585020	GNL3
29942086	Intelligence	EUR	Testis_eQTL	EUR	eQTL	GTEx v8	Testis_eQTL	ENSG00000163938.16	GNL3	3	1803	1.03451424992307e-20	5.39724806687907e-15	3.67350834261348e-7	0.190844423291944	0.809155209357213	4.23986824136542	rs12489828	rs4687625_NT5DC2	0.06960889781683	1.74e-11	5e-8	5e-8	8.24403e-19	rs4687625	NT5DC2
29942086	Intelligence	EUR	Breast_Mammary_Tissue_eQTL	EUR	eQTL	GTEx v8	Breast_Mammary_Tissue_eQTL	ENSG00000163938.16	GNL3	3	1803	9.78516804306594e-11	0.0000510509925875374	3.86252451332076e-7	0.200715661304733	0.799232901352378	3.98191599079535	rs4687625	rs4687625_NT5DC2	0.18267103862736	1.918e-12	5e-8	5e-8	5.03545e-8	rs4687625	NT5DC2
29942086	Intelligence	EUR	Stomach_eQTL	EUR	eQTL	GTEx v8	Stomach_eQTL	ENSG00000163938.16	GNL3	3	1803	1.15818445734457e-10	0.0000604245792066877	3.27437311336483e-7	0.170000032025862	0.829939215841802	4.88199446759835	rs4687625	rs4687625_NT5DC2	0.218061825579981	1.918e-12	5e-8	5e-8	3.75865e-8	rs4687625	NT5DC2
29942086	Intelligence	EUR	Artery_Aorta_eQTL	EUR	eQTL	GTEx v8	Artery_Aorta_eQTL	ENSG00000163938.16	GNL3	3	1803	2.37062982808004e-12	0.00000123680048465667	7.59933065507465e-7	0.395866702142947	0.604131301121133	1.52609779466367	rs4687625	rs4687625_NT5DC2	0.063215266386706	1.918e-12	5e-8	5e-8	3.5808e-9	rs4687625	NT5DC2
29942086	Intelligence	EUR	Heart_Left_Ventricle_eQTL	EUR	eQTL	GTEx v8	Heart_Left_Ventricle_eQTL	ENSG00000163938.16	GNL3	3	1803	4.24066893258968e-14	2.21243372920149e-8	6.09281133731566e-7	0.317190184974083	0.682809183620402	2.15268068170581	rs1961958	rs4687625_NT5DC2	0.0578621695828773	3.122e-11	5e-8	5e-8	1.89996e-12	rs4687625	NT5DC2
29942086	Intelligence	EUR	Esophagus_Gastroesophageal_Junction_eQTL	EUR	eQTL	GTEx v8	Esophagus_Gastroesophageal_Junction_eQTL	ENSG00000163938.16	GNL3	3	1803	4.21606726956715e-11	0.0000219959859636497	7.37085470687222e-7	0.383934787253947	0.616042479632456	1.60454978315103	rs2239549	rs4687625_NT5DC2	0.0704778784780629	4.763e-11	5e-8	5e-8	1.27553e-9	rs4687625	NT5DC2
29942086	Intelligence	EUR	Pancreas_eQTL	EUR	eQTL	GTEx v8	Pancreas_eQTL	ENSG00000163938.16	GNL3	3	1803	9.84456736831249e-10	0.000513608896173605	6.03593534392156e-7	0.314220405267649	0.685265381258187	2.1808430317391	rs4475032	rs4687625_NT5DC2	0.088361004720196	3.488e-12	5e-8	5e-8	8.79252e-7	rs4687625	NT5DC2
31768069	Red blood cell (erythrocyte) distribution width	EUR	PsychENCODE_50PEER_eQTL	EUR	eQTL	PsychENCODE_50PEER	PsychENCODE_50PEER_eQTL	ENSG00000163938	GNL3	3	303	2.00822865582613e-19	0.00000102429020116423	1.02407325656797e-14	0.0512837932489756	0.948715182460811	18.4993176665956	rs7646741	rs2276823_AC006254.1	0.304534156913294	6.61725e-19	5e-8	5e-8	1.03582e-10	rs2276823	AC006254.1
31768069	Red blood cell (erythrocyte) distribution width	EUR	ROSMAP_CMC_eQTL	EUR	eQTL	Brain xQTLServe	ROSMAP_CMC_eQTL	ENSG00000163938	GNL3	3	1954	1.56224189641902e-51	1.19260436831043e-38	8.45924295944506e-15	0.0636409008575811	0.936359099142411	14.713165378313	rs7646741	rs2276823_AC006254.1	0.384276120362859	6.61725e-19	5e-8	5e-8	1.67693196e-40	rs2276823	AC006254.1
31768069	Red blood cell (erythrocyte) distribution width	EUR	PsychENCODE_100HCP_eQTL	EUR	eQTL	PsychENCODE_100HCP	PsychENCODE_100HCP_eQTL	ENSG00000163938	GNL3	3	773	4.18533077584723e-84	2.38442074345174e-71	1.14100578356332e-14	0.0640681982045349	0.935931801795462	14.6083677709734	rs2336147	rs2276823_AC006254.1	0.367823803650413	1.69927e-18	5e-8	5e-8	2.94649e-80	rs2276823	AC006254.1
31768069	Red blood cell (erythrocyte) distribution width	EUR	eQTLGen_eQTL	EUR	eQTL	eQTLGen	eQTLGen_eQTL	ENSG00000163938	GNL3	3	1953	1.41873072593336e-75	1.08536528414259e-62	1.0204534455781e-14	0.07714444246235	0.922855557537631	11.9626965738722	rs13083798	rs2276823_AC006254.1	0.376036825122209	7.32256e-19	5e-8	5e-8	1.1061e-67	rs2276823	AC006254.1
31768069	Red blood cell (erythrocyte) distribution width	EUR	BrainMeta_cis_eQTL	EUR	eQTL	BrainMeta (6 cohorts)	BrainMeta_cis_eQTL	ENSG00000163938.17	GNL3	3	2150	1.73854598381494e-43	1.41587761714057e-30	1.09862953449538e-14	0.0885613150934102	0.911438684906585	10.2916119069059	rs2590838	rs2276823_AC006254.1	0.263732710863688	1.72166e-18	5e-8	5e-8	6.47607e-36	rs2276823	AC006254.1
31768069	Red blood cell (erythrocyte) count	EUR	ROSMAP_CMC_eQTL	EUR	eQTL	Brain xQTLServe	ROSMAP_CMC_eQTL	ENSG00000163938	GNL3	3	1760	4.48615945363775e-52	2.01551301252173e-38	1.93403155293789e-15	0.0859769089379628	0.914023091062028	10.6310299166669	rs11130324	rs2878632_PBRM1	0.345016562311173	1.69744e-19	5e-8	5e-8	1.67693196e-40	rs2878632	PBRM1
31768069	Red blood cell (erythrocyte) count	EUR	PsychENCODE_50PEER_eQTL	EUR	eQTL	PsychENCODE_50PEER	PsychENCODE_50PEER_eQTL	ENSG00000163938	GNL3	3	320	5.57118326218087e-20	9.37186217607913e-7	2.85208673133692e-15	0.047024919425042	0.952974143388741	20.2653009306648	rs13081155	rs2878632_PBRM1	0.288250097073924	4.11898e-19	5e-8	5e-8	4.51106e-11	rs2878632	PBRM1
31768069	Red blood cell (erythrocyte) count	EUR	BrainMeta_cis_eQTL	EUR	eQTL	BrainMeta (6 cohorts)	BrainMeta_cis_eQTL	ENSG00000163938.17	GNL3	3	1934	2.61049003120759e-44	1.49378986061385e-30	1.66279487378315e-15	0.0942436636209517	0.905756336379042	9.61079293375093	rs13083798	rs2878632_PBRM1	0.439953143631297	2.23002e-20	5e-8	5e-8	4.61422e-35	rs2878632	PBRM1
31768069	Red blood cell (erythrocyte) count	EUR	eQTLGen_eQTL	EUR	eQTL	eQTLGen	eQTLGen_eQTL	ENSG00000163938	GNL3	3	1768	1.02347459936833e-76	5.82210007701066e-63	7.36156736649211e-16	0.040917659845558	0.959082340154442	23.4393253127001	rs13083798	rs2878632_PBRM1	0.82205374728536	2.23002e-20	5e-8	5e-8	1.1061e-67	rs2878632	PBRM1
31768069	Red blood cell (erythrocyte) count	EUR	PsychENCODE_100HCP_eQTL	EUR	eQTL	PsychENCODE_100HCP	PsychENCODE_100HCP_eQTL	ENSG00000163938	GNL3	3	777	1.15170917492163e-84	1.93817351878009e-71	3.10452972660503e-15	0.0512964068513403	0.948703593148644	18.4945428224249	rs13081155	rs2878632_PBRM1	0.378683172163176	4.11898e-19	5e-8	5e-8	3.20393e-80	rs2878632	PBRM1
32888493	RBC distribution width	EUR	PsychENCODE_50PEER_eQTL	EUR	eQTL	PsychENCODE_50PEER	PsychENCODE_50PEER_eQTL	ENSG00000163938	GNL3	3	325	4.39520115243389e-21	0.00000686605933862648	2.25285473173404e-16	0.351285908117682	0.648707225822978	1.84666452832961	rs2336147	rs10933_PBRM1	0.289767148368632	2.94e-20	5e-8	5e-8	7.25772e-11	rs10933	PBRM1
32888493	RBC distribution width	EUR	PsychENCODE_100HCP_eQTL	EUR	eQTL	PsychENCODE_100HCP	PsychENCODE_100HCP_eQTL	ENSG00000163938	GNL3	3	827	7.91127934079457e-86	1.30452968677271e-70	2.14525933015086e-16	0.353095437409473	0.646904562590517	1.83209550181846	rs2336147	rs10933_PBRM1	0.542768571492525	2.94e-20	5e-8	5e-8	2.94649e-80	rs10933	PBRM1
30124842	Body mass index	EUR	Esophagus_Muscularis_eQTL	EUR	eQTL	GTEx v8	Esophagus_Muscularis_eQTL	ENSG00000163938.16	GNL3	3	265	1.02722318172574e-20	8.09465658088534e-10	1.41934767339739e-12	0.110957459656112	0.889042539533006	8.01246299517311	rs2710323	rs2710323_ITIH1	0.99711259116394	4.8e-18	5e-8	5e-8	2.83876e-13	rs2710323	ITIH1
30124842	Body mass index	EUR	Heart_Left_Ventricle_eQTL	EUR	eQTL	GTEx v8	Heart_Left_Ventricle_eQTL	ENSG00000163938.16	GNL3	3	265	1.56169705291574e-18	1.23063824411517e-7	4.36894456391593e-12	0.343622319564828	0.656377557366976	1.91017148769099	rs2710323	rs2710323_ITIH1	0.999809596967929	4.8e-18	5e-8	5e-8	6.52155e-11	rs2710323	ITIH1
30124842	Body mass index	EUR	Esophagus_Gastroesophageal_Junction_eQTL	EUR	eQTL	GTEx v8	Esophagus_Gastroesophageal_Junction_eQTL	ENSG00000163938.16	GNL3	3	265	2.99438391990727e-16	0.0000235961472970789	1.76779921843172e-12	0.138443418769627	0.861532985081311	6.2229970390642	rs2710323	rs2710323_ITIH1	0.997982869798936	4.8e-18	5e-8	5e-8	1.14486e-8	rs2710323	ITIH1
30124842	Body mass index	EUR	Testis_eQTL	EUR	eQTL	GTEx v8	Testis_eQTL	ENSG00000163938.16	GNL3	3	265	3.80886643024009e-25	3.00143788260885e-14	2.28614546714365e-12	0.179330662716831	0.820669337280854	4.57629122007272	rs2710323	rs2710323_ITIH1	0.999556128874522	4.8e-18	5e-8	5e-8	9.27812e-18	rs2710323	ITIH1
30124842	Body mass index	EUR	Artery_Aorta_eQTL	EUR	eQTL	GTEx v8	Artery_Aorta_eQTL	ENSG00000163938.16	GNL3	3	265	4.79195677639022e-17	0.00000377612627376255	4.06992500989793e-12	0.320035594189997	0.679960629679656	2.12464064005324	rs2710323	rs2710323_ITIH1	0.999838681067558	4.8e-18	5e-8	5e-8	2.2023e-9	rs2710323	ITIH1
22763110	Osteoarthritis	EUR	Breast_Mammary_Tissue_eQTL	EUR	eQTL	GTEx v8	Breast_Mammary_Tissue_eQTL	ENSG00000163938.16	GNL3	3	343	1.27392671279879e-9	0.000032757856365419	0.00000133293906208067	0.0333086475124643	0.966657260418182	29.0212101844259	rs8906	rs12488461_PBRM1	0.11826019699398	6.7995e-10	5e-8	5e-8	9.75486e-9	rs12488461	PBRM1
22763110	Osteoarthritis	EUR	Testis_eQTL	EUR	eQTL	GTEx v8	Testis_eQTL	ENSG00000163938.16	GNL3	3	343	1.5533953397663e-19	3.99441356457472e-15	0.00000102744738872634	0.0254453130760115	0.974553659476595	38.2999280286063	rs2028216	rs12488461_PBRM1	0.165378216777095	6.9584e-10	5e-8	5e-8	4.14958e-19	rs12488461	PBRM1
22763110	Osteoarthritis	EUR	Artery_Aorta_eQTL	EUR	eQTL	GTEx v8	Artery_Aorta_eQTL	ENSG00000163938.16	GNL3	3	343	3.09018674609189e-11	7.94613163801268e-7	0.00000440428309929078	0.112364467852429	0.887630333220405	7.89956425002744	rs2028216	rs12488461_PBRM1	0.0383330287137357	6.9584e-10	5e-8	5e-8	5.99589e-10	rs12488461	PBRM1
22763110	Osteoarthritis	EUR	Artery_Tibial_eQTL	EUR	eQTL	GTEx v8	Artery_Tibial_eQTL	ENSG00000163938.16	GNL3	3	343	3.7227064858837e-16	9.57259810395805e-12	0.00000650407568920907	0.166412756963504	0.833580738951237	5.0091156120564	rs3796353	rs12488461_PBRM1	0.0575636278347885	1.1924e-8	5e-8	5e-8	2.84397e-16	rs12488461	PBRM1
22763110	Osteoarthritis	EUR	Artery_Coronary_eQTL	EUR	eQTL	GTEx v8	Artery_Coronary_eQTL	ENSG00000163938.16	GNL3	3	343	1.05617634442322e-10	0.00000271586054673096	0.0000049843313631264	0.127294809502595	0.872697490199877	6.85571936208509	rs8906	rs12488461_PBRM1	0.0524855660020672	6.7995e-10	5e-8	5e-8	6.05091e-10	rs12488461	PBRM1
22763110	Osteoarthritis	EUR	Brain_Cerebellum_eQTL	EUR	eQTL	GTEx v8	Brain_Cerebellum_eQTL	ENSG00000163938.16	GNL3	3	343	3.24711089407687e-24	8.34964768397613e-20	0.0000063008187946373	0.161180960444134	0.838812738737069	5.20416764130032	rs13063160	rs12488461_PBRM1	0.051705583474711	6.1138e-9	5e-8	5e-8	7.10919e-23	rs12488461	PBRM1
22763110	Osteoarthritis	EUR	Adipose_Subcutaneous_eQTL	EUR	eQTL	GTEx v8	Adipose_Subcutaneous_eQTL	ENSG00000163938.16	GNL3	3	343	2.4731213437551e-10	0.00000635940458262275	0.00000198484385617204	0.0500885351941064	0.949903120310142	18.9644819244367	rs2028216	rs12488461_PBRM1	0.105123868967187	6.9584e-10	5e-8	5e-8	2.96728e-9	rs12488461	PBRM1
22763110	Osteoarthritis	EUR	Heart_Left_Ventricle_eQTL	EUR	eQTL	GTEx v8	Heart_Left_Ventricle_eQTL	ENSG00000163938.16	GNL3	3	343	4.70291752261843e-13	1.20931208331353e-8	0.00000221023083406744	0.0558899497904959	0.944107827885078	16.8922647349671	rs2028216	rs12488461_PBRM1	0.0922348561166109	6.9584e-10	5e-8	5e-8	2.20958e-12	rs12488461	PBRM1
22763110	Osteoarthritis	EUR	Muscle_Skeletal_eQTL	EUR	eQTL	GTEx v8	Muscle_Skeletal_eQTL	ENSG00000163938.16	GNL3	3	343	5.24087762792609e-16	1.3476435876532e-11	0.00000121075184491187	0.0301635373600029	0.969835251874677	32.1525701809989	rs11714419	rs12488461_PBRM1	0.107911978906376	6.6674e-10	5e-8	5e-8	3.33605e-15	rs12488461	PBRM1
22763110	Osteoarthritis	EUR	Stomach_eQTL	EUR	eQTL	GTEx v8	Stomach_eQTL	ENSG00000163938.16	GNL3	3	343	2.0008038540193e-9	0.0000514488350129235	0.00000140364836837521	0.0351287112616352	0.964818434254181	27.4652385357467	rs1961958	rs12488461_PBRM1	0.171443662295894	1.1473e-9	5e-8	5e-8	5.17658e-9	rs12488461	PBRM1
30038396	Cognitive performance	EUR	Heart_Atrial_Appendage_eQTL	EUR	eQTL	GTEx v8	Heart_Atrial_Appendage_eQTL	ENSG00000163938.16	GNL3	3	1666	1.01805282767031e-8	0.000390991078085722	0.00000868415788767556	0.332855068404583	0.666745246178914	2.00310979001975	rs11130327	rs4434138_STAB1	0.0552440107631436	6.33e-10	5e-8	5e-8	8.45536e-8	rs4434138	STAB1
30038396	Cognitive performance	EUR	Colon_Transverse_eQTL	EUR	eQTL	GTEx v8	Colon_Transverse_eQTL	ENSG00000163938.16	GNL3	3	1666	8.0695919141615e-11	0.00000309918931166861	0.00000659101254508561	0.252385339670632	0.747604970046816	2.96215687893146	rs7623199	rs4434138_STAB1	0.0214140830745766	3.77e-10	5e-8	5e-8	1.7085e-9	rs4434138	STAB1
30038396	Cognitive performance	EUR	Testis_eQTL	EUR	eQTL	GTEx v8	Testis_eQTL	ENSG00000163938.16	GNL3	3	1666	6.71504995358837e-20	2.57896697439679e-15	0.00000233516777027083	0.0887727029437562	0.911224961888471	10.2646977243196	rs7623199	rs4434138_STAB1	0.033696956921444	3.77e-10	5e-8	5e-8	4.14958e-19	rs4434138	STAB1
30038396	Cognitive performance	EUR	Stomach_eQTL	EUR	eQTL	GTEx v8	Stomach_eQTL	ENSG00000163938.16	GNL3	3	1666	1.19312191274914e-9	0.0000458227716945704	0.00000339208140952713	0.129404969484729	0.870545814469045	6.72729817050633	rs1961958	rs4434138_STAB1	0.076807114030608	3.84e-10	5e-8	5e-8	5.17658e-9	rs4434138	STAB1
30038396	Cognitive performance	EUR	Heart_Left_Ventricle_eQTL	EUR	eQTL	GTEx v8	Heart_Left_Ventricle_eQTL	ENSG00000163938.16	GNL3	3	1666	2.98784929998455e-13	1.14750667863864e-8	0.00000447033653287086	0.170857601010992	0.82913791717711	4.85280088372402	rs1961958	rs4434138_STAB1	0.0318555120845078	3.84e-10	5e-8	5e-8	1.89996e-12	rs4434138	STAB1
30038396	Cognitive performance	EUR	Artery_Coronary_eQTL	EUR	eQTL	GTEx v8	Artery_Coronary_eQTL	ENSG00000163938.16	GNL3	3	1666	8.79871133499933e-11	0.00000337921327570885	0.0000101718030825839	0.390046039834736	0.609940409060921	1.56376516300321	rs12486554	rs4434138_STAB1	0.029322612533911	5.49e-10	5e-8	5e-8	4.05652e-10	rs4434138	STAB1
30038396	Cognitive performance	EUR	Breast_Mammary_Tissue_eQTL	EUR	eQTL	GTEx v8	Breast_Mammary_Tissue_eQTL	ENSG00000163938.16	GNL3	3	1666	8.4747721812354e-10	0.000032548019332698	0.00000335136971626721	0.127839826896283	0.872124272867192	6.82200761719391	rs1961958	rs4434138_STAB1	0.028354335325166	3.84e-10	5e-8	5e-8	1.33396e-8	rs4434138	STAB1
30038396	Cognitive performance	EUR	Artery_Aorta_eQTL	EUR	eQTL	GTEx v8	Artery_Aorta_eQTL	ENSG00000163938.16	GNL3	3	1666	2.32878281373854e-11	8.94387087018635e-7	0.00000828261506047983	0.317417677042145	0.682573145932418	2.15039424487311	rs11130327	rs4434138_STAB1	0.0469087712494687	6.33e-10	5e-8	5e-8	1.07438e-10	rs4434138	STAB1
30038396	Cognitive performance	EUR	Esophagus_Gastroesophageal_Junction_eQTL	EUR	eQTL	GTEx v8	Esophagus_Gastroesophageal_Junction_eQTL	ENSG00000163938.16	GNL3	3	1666	3.46992107055607e-10	0.000013326500780453	0.00000639251971905744	0.244754447998154	0.755225832634353	3.08564701810873	rs2289249	rs4434138_STAB1	0.0335922285747948	4.2e-10	5e-8	5e-8	2.86525e-9	rs4434138	STAB1
30038396	Cognitive performance	EUR	Pancreas_eQTL	EUR	eQTL	GTEx v8	Pancreas_eQTL	ENSG00000163938.16	GNL3	3	1666	7.78680576341553e-9	0.000299058309896263	0.00000475901249026722	0.181955822435151	0.817740352455657	4.49416974687414	rs2019065	rs4434138_STAB1	0.0335065849608369	8.15e-9	5e-8	5e-8	3.04086e-9	rs4434138	STAB1
30643258	The first PC of the four risky behaviors	EUR	Esophagus_Gastroesophageal_Junction_eQTL	EUR	eQTL	GTEx v8	Esophagus_Gastroesophageal_Junction_eQTL	ENSG00000163938.16	GNL3	3	1984	2.02563005616173e-8	0.00000975208186579816	0.000392844478689505	0.188317604098465	0.811279779084679	4.3080400420796	rs4687552	rs4687552_ITIH3	0.764038128354018	2.469e-9	5e-8	5e-8	8.56952e-10	rs4687552	ITIH3
30643258	The first PC of the four risky behaviors	EUR	Breast_Mammary_Tissue_eQTL	EUR	eQTL	GTEx v8	Breast_Mammary_Tissue_eQTL	ENSG00000163938.16	GNL3	3	1984	1.805044067364e-7	0.0000869010482084871	0.000737355703352341	0.354343640006369	0.644831922737664	1.81979256838383	rs4687552	rs4687552_ITIH3	0.610177614759145	2.469e-9	5e-8	5e-8	2.25653e-8	rs4687552	ITIH3
30643258	The first PC of the four risky behaviors	EUR	Esophagus_Muscularis_eQTL	EUR	eQTL	GTEx v8	Esophagus_Muscularis_eQTL	ENSG00000163938.16	GNL3	3	1984	2.79004849431747e-13	1.34322559261821e-10	0.000748500747427599	0.359714543658671	0.6395369554593	1.77790130183379	rs2577831	rs4687552_ITIH3	0.222042549774728	9.641e-8	5e-8	5e-8	1.64549e-15	rs4687552	ITIH3
31768069	Age when periods started (menarche)	EUR	eQTLGen_eQTL	EUR	eQTL	eQTLGen	eQTLGen_eQTL	ENSG00000163938	GNL3	3	1619	4.9670170102846e-69	1.22219054174278e-62	3.57263681524579e-8	0.0869957530093028	0.913004211264315	10.4948135935634	rs2590838	rs11709284_NT5DC2	0.597441716603808	6.29059e-12	5e-8	5e-8	4.9534e-68	rs11709284	NT5DC2
31768069	Age when periods started (menarche)	EUR	BrainMeta_cis_eQTL	EUR	eQTL	BrainMeta (6 cohorts)	BrainMeta_cis_eQTL	ENSG00000163938.17	GNL3	3	1791	5.31679537270038e-37	1.32486322280389e-30	3.38597935571948e-8	0.0834568285479092	0.916543137592299	10.9822425982333	rs2590838	rs11709284_NT5DC2	0.380295561396031	6.29059e-12	5e-8	5e-8	6.47607e-36	rs11709284	NT5DC2
31768069	Age when periods started (menarche)	EUR	PsychENCODE_50PEER_eQTL	EUR	eQTL	PsychENCODE_50PEER	PsychENCODE_50PEER_eQTL	ENSG00000163938	GNL3	3	306	7.51613993818125e-13	7.58214195318559e-7	3.883075645704e-8	0.0382099544961236	0.961789248458173	25.1711696897139	rs2336147	rs11709284_NT5DC2	0.303508263635679	5.95729e-12	5e-8	5e-8	7.25772e-11	rs11709284	NT5DC2
31768069	Age when periods started (menarche)	EUR	ROSMAP_CMC_eQTL	EUR	eQTL	Brain xQTLServe	ROSMAP_CMC_eQTL	ENSG00000163938	GNL3	3	1628	9.59822402589779e-45	2.35015153270321e-38	3.28679548993032e-8	0.0795576486022466	0.920442318529803	11.5695012949869	rs7646741	rs11709284_NT5DC2	0.278851800532824	6.25177e-12	5e-8	5e-8	1.67693196e-40	rs11709284	NT5DC2
31768069	Age when periods started (menarche)	EUR	PsychENCODE_100HCP_eQTL	EUR	eQTL	PsychENCODE_100HCP	PsychENCODE_100HCP_eQTL	ENSG00000163938	GNL3	3	715	1.40254807969615e-77	1.46202235466377e-71	3.66995211362282e-8	0.0372930370895261	0.962706926210953	25.8146560683665	rs2336147	rs11709284_NT5DC2	0.563212685149777	5.95729e-12	5e-8	5e-8	2.94649e-80	rs11709284	NT5DC2
29942085	Worry subcluster	EUR	Testis_eQTL	EUR	eQTL	GTEx v8	Testis_eQTL	ENSG00000163938.16	GNL3	3	1689	8.5152946180823e-20	9.78264381377951e-15	0.00000239563158022809	0.274492341088711	0.725505263279697	2.64308016902091	rs12489828	rs353547_TWF2	0.249402978864471	3.698e-11	5e-8	5e-8	8.24403e-19	rs353547	TWF2
29942085	Worry subcluster	EUR	Esophagus_Muscularis_eQTL	EUR	eQTL	GTEx v8	Esophagus_Muscularis_eQTL	ENSG00000163938.16	GNL3	3	1689	6.19514549592479e-16	7.117182021216e-11	0.00000141440712885969	0.161653286169543	0.838345299352158	5.18607025701226	rs2577831	rs353547_TWF2	0.221903270094909	1.23e-10	5e-8	5e-8	1.64549e-15	rs353547	TWF2
23974872	Schizophrenia	EUR	Esophagus_Gastroesophageal_Junction_eQTL	EUR	eQTL	GTEx v8	Esophagus_Gastroesophageal_Junction_eQTL	ENSG00000163938.16	GNL3	3	903	4.76428758261154e-9	0.00000910600668751616	0.0000556900371107956	0.105546257548666	0.894388941643249	8.47390483012489	rs10933	rs11717383_WDR82	0.379404210560903	7.353e-9	5e-8	5e-8	4.47958e-10	rs11717383	WDR82
23974872	Schizophrenia	EUR	Heart_Atrial_Appendage_eQTL	EUR	eQTL	GTEx v8	Heart_Atrial_Appendage_eQTL	ENSG00000163938.16	GNL3	3	903	7.01449113334856e-8	0.000134068319895128	0.0000440657321022691	0.0833065389260963	0.916515256876995	11.0017204974757	rs7646741	rs11717383_WDR82	0.343956010508512	3.781e-9	5e-8	5e-8	4.25618e-8	rs11717383	WDR82
23974872	Schizophrenia	EUR	Heart_Left_Ventricle_eQTL	EUR	eQTL	GTEx v8	Heart_Left_Ventricle_eQTL	ENSG00000163938.16	GNL3	3	903	1.62079583585478e-11	3.09783518825742e-8	0.000183886042472544	0.350813309999098	0.64900277296387	1.84999472501639	rs2577831	rs11717383_WDR82	0.582436010128536	8.862e-10	5e-8	5e-8	9.35173e-12	rs11717383	WDR82
23974872	Schizophrenia	EUR	Esophagus_Muscularis_eQTL	EUR	eQTL	GTEx v8	Esophagus_Muscularis_eQTL	ENSG00000163938.16	GNL3	3	903	3.83194628427269e-15	7.32401810044867e-12	0.00000828908660419	0.0148578388163431	0.985133872089727	66.3039816400563	rs2577831	rs11717383_WDR82	0.464235677275591	8.862e-10	5e-8	5e-8	1.64549e-15	rs11717383	WDR82
23974872	Schizophrenia	EUR	Esophagus_Muscularis_eQTL	EUR	eQTL	GTEx v8	Esophagus_Muscularis_eQTL	ENSG00000163938.16	GNL3	3	1475	2.54985689733666e-15	9.54796000255079e-11	0.000006054383098241	0.225932809051044	0.774061136470373	3.42606786381119	rs2577831	rs2535627_ITIH4	0.429321703556349	8.862e-10	5e-8	5e-8	1.64549e-15	rs2535627	ITIH4
23974872	Schizophrenia	EUR	Testis_eQTL	EUR	eQTL	GTEx v8	Testis_eQTL	ENSG00000163938.16	GNL3	3	903	4.44368379301824e-18	8.49323506081277e-15	0.000104940964042256	0.199774068496015	0.800120990539933	4.00512937721891	rs2577831	rs11717383_WDR82	0.508239954400958	8.862e-10	5e-8	5e-8	1.8951e-18	rs11717383	WDR82
32242144	25 hydroxyvitamin D conditioned on BMI with mtCOJO	EUR	ROSMAP_CMC_eQTL	EUR	eQTL	Brain xQTLServe	ROSMAP_CMC_eQTL	ENSG00000163938	GNL3	3	1890	1.9662070965828e-43	2.08313160018854e-39	9.80425932786795e-7	0.00939668721502419	0.990602332359041	105.420379511535	rs11130324	rs11130324_NEK4	0.325981543849238	1.20469e-10	5e-8	5e-8	1.67693196e-40	rs11130324	NEK4
32242144	25 hydroxyvitamin D conditioned on BMI with mtCOJO	EUR	BrainMeta_cis_eQTL	EUR	eQTL	BrainMeta (6 cohorts)	BrainMeta_cis_eQTL	ENSG00000163938.17	GNL3	3	1902	2.44888189798324e-35	2.58968184364349e-31	0.0000014971797524637	0.0148474590335673	0.985151043786677	66.3514909560912	rs2590838	rs11130324_NEK4	0.231799295400895	3.53224e-10	5e-8	5e-8	6.47607e-36	rs11130324	NEK4
32242144	25 hydroxyvitamin D conditioned on BMI with mtCOJO	EUR	eQTLGen_eQTL	EUR	eQTL	eQTLGen	eQTLGen_eQTL	ENSG00000163938	GNL3	3	1844	2.88200326227653e-67	3.0558001308093e-63	0.00000207294457320111	0.0210005207325442	0.978997406322878	46.6177681397082	rs2590838	rs11130324_NEK4	0.478950386789402	3.53224e-10	5e-8	5e-8	4.9534e-68	rs11130324	NEK4
32242144	25 hydroxyvitamin D conditioned on BMI with mtCOJO	EUR	PsychENCODE_50PEER_eQTL	EUR	eQTL	PsychENCODE_50PEER	PsychENCODE_50PEER_eQTL	ENSG00000163938	GNL3	3	316	2.40823313380328e-11	1.66384492837307e-7	0.00000123250007652925	0.00752285016485801	0.99247575092649	131.928156108001	rs13081155	rs11130324_NEK4	0.305146668502572	2.32463e-10	5e-8	5e-8	4.51106e-11	rs11130324	NEK4
32242144	25 hydroxyvitamin D conditioned on BMI with mtCOJO	EUR	PsychENCODE_100HCP_eQTL	EUR	eQTL	PsychENCODE_100HCP	PsychENCODE_100HCP_eQTL	ENSG00000163938	GNL3	3	799	5.12443948735531e-76	3.94895540838869e-72	0.00000141681178982291	0.00992805347955249	0.990070529708668	99.724536309941	rs13081155	rs11130324_NEK4	0.422395113048785	2.32463e-10	5e-8	5e-8	3.20393e-80	rs11130324	NEK4
32888493	hematocrit	EUR	PsychENCODE_50PEER_eQTL	EUR	eQTL	PsychENCODE_50PEER	PsychENCODE_50PEER_eQTL	ENSG00000163938	GNL3	3	313	2.83080204543373e-23	2.51120281204748e-7	1.46423108917749e-18	0.0120011867274412	0.98799856215228	82.3250720608476	rs13081155	rs66782572_NT5DC2	0.295204342173799	1.76e-22	5e-8	5e-8	4.51106e-11	rs66782572	NT5DC2
32888493	hematocrit	EUR	ROSMAP_CMC_eQTL	EUR	eQTL	Brain xQTLServe	ROSMAP_CMC_eQTL	ENSG00000163938	GNL3	3	1680	1.8606821288263e-55	9.75312234534401e-38	6.81381345436221e-19	0.356515619956958	0.643484380043036	1.80492619123034	rs11130324	rs66782572_NT5DC2	0.290855909461494	8.97e-23	5e-8	5e-8	1.67693196e-40	rs66782572	NT5DC2
32888493	hematocrit	EUR	PsychENCODE_100HCP_eQTL	EUR	eQTL	PsychENCODE_100HCP	PsychENCODE_100HCP_eQTL	ENSG00000163938	GNL3	3	766	4.08388821453746e-88	1.24084901510336e-70	1.07947082397886e-18	0.327313840013491	0.672686159986498	2.05517175796407	rs13081155	rs66782572_NT5DC2	0.383293078850891	1.76e-22	5e-8	5e-8	3.20393e-80	rs66782572	NT5DC2
32888493	hematocrit	EUR	BrainMeta_cis_eQTL	EUR	eQTL	BrainMeta (6 cohorts)	BrainMeta_cis_eQTL	ENSG00000163938.17	GNL3	3	2040	1.12236026815838e-47	3.03844958808585e-30	7.27483235133597e-19	0.196140133862187	0.80385986613781	4.09839562311415	rs13083798	rs66782572_NT5DC2	0.315282383529043	1.36e-23	5e-8	5e-8	4.61422e-35	rs66782572	NT5DC2
32888493	hematocrit	EUR	eQTLGen_eQTL	EUR	eQTL	eQTLGen	eQTLGen_eQTL	ENSG00000163938	GNL3	3	1915	5.43114394505531e-80	2.5795661964967e-62	3.90647037584679e-19	0.1847257283439	0.815274271656089	4.41343108491259	rs13083798	rs66782572_NT5DC2	0.690439294919209	1.36e-23	5e-8	5e-8	1.1061e-67	rs66782572	NT5DC2
31768069	Time spent watching television (TV)	EUR	PsychENCODE_50PEER_eQTL	EUR	eQTL	PsychENCODE_50PEER	PsychENCODE_50PEER_eQTL	ENSG00000215032	GNL3LP1	5	459	5.73598205732948e-15	3.93173639487023e-11	0.0000122674108999892	0.0831703108577346	0.916817421692043	11.0233737524474	rs34619	rs10461459_ERCC8	0.149856811183094	1.25792e-9	5e-8	5e-8	2.06632e-15	rs10461459	ERCC8
31768069	Time spent watching television (TV)	EUR	PsychENCODE_100HCP_eQTL	EUR	eQTL	PsychENCODE_100HCP	PsychENCODE_100HCP_eQTL	ENSG00000215032	GNL3LP1	5	626	9.34834732071124e-14	6.48128501225969e-10	0.0000119143060961863	0.0816845468732644	0.918303538172416	11.242071766612	rs17444495	rs10461459_ERCC8	0.113485691106341	2.07335e-9	5e-8	5e-8	3.52702e-14	rs10461459	ERCC8
34822786	Total joint replacement	EUR	Breast_Mammary_Tissue_eQTL	EUR	eQTL	GTEx v8	Breast_Mammary_Tissue_eQTL	ENSG00000163938.16	GNL3	3	2239	3.85828362339541e-13	0.000042231862074794	1.69940472966298e-9	0.185198071806909	0.814759694631227	4.39939620689308	rs3774355	rs3774354_ITIH1	0.350785704676689	2.854e-14	5e-8	5e-8	1.05372e-8	rs3774354	ITIH1
34822786	Total joint replacement	EUR	Artery_Coronary_eQTL	EUR	eQTL	GTEx v8	Artery_Coronary_eQTL	ENSG00000163938.16	GNL3	3	2239	1.97198217239177e-14	0.00000215848515162067	2.84108326087112e-9	0.310288560148244	0.689709278525501	2.22279957145692	rs3774355	rs3774354_ITIH1	0.222647250611431	2.854e-14	5e-8	5e-8	4.2392e-10	rs3774354	ITIH1
34822786	Total joint replacement	EUR	Stomach_eQTL	EUR	eQTL	GTEx v8	Stomach_eQTL	ENSG00000163938.16	GNL3	3	2239	9.31330037902435e-13	0.000101941188222433	2.94009955959254e-9	0.321137599372449	0.678760456498299	2.11361253812914	rs3774354	rs3774354_ITIH1	0.264874273723989	2.811e-14	5e-8	5e-8	4.23568e-8	rs3774354	ITIH1
34822786	Total joint replacement	EUR	PsychENCODE_50PEER_eQTL	EUR	eQTL	PsychENCODE_50PEER	PsychENCODE_50PEER_eQTL	ENSG00000163938	GNL3	3	313	5.05239210105043e-13	0.00000297158733874365	2.58523935594787e-8	0.151203231965082	0.848793770594681	5.61359542096755	rs13081155	rs3774354_ITIH1	0.345833538269873	1.321e-11	5e-8	5e-8	4.51106e-11	rs3774354	ITIH1
32888493	red blood cell count	EUR	PsychENCODE_50PEER_eQTL	EUR	eQTL	PsychENCODE_50PEER	PsychENCODE_50PEER_eQTL	ENSG00000163938	GNL3	3	326	3.01676948919611e-20	1.38384902480245e-7	1.54638930596644e-15	0.00609967902752585	0.993900182587573	162.94302996968	rs3774349	rs13083798_PBRM1	0.309224758981663	1.32e-19	5e-8	5e-8	6.77797e-11	rs13083798	PBRM1
32888493	red blood cell count	EUR	BrainMeta_cis_eQTL	EUR	eQTL	BrainMeta (6 cohorts)	BrainMeta_cis_eQTL	ENSG00000163938.17	GNL3	3	2157	1.84367226692637e-44	2.23322266847233e-31	1.19478108181001e-15	0.0134857552774973	0.986514244722494	73.1523169761668	rs2590838	rs13083798_PBRM1	0.282131469497306	1.55e-19	5e-8	5e-8	6.47607e-36	rs13083798	PBRM1
32888493	red blood cell count	EUR	PsychENCODE_100HCP_eQTL	EUR	eQTL	PsychENCODE_100HCP	PsychENCODE_100HCP_eQTL	ENSG00000163938	GNL3	3	820	6.15559966186762e-85	2.82783428098102e-72	1.67140403115358e-15	0.00668498421791402	0.99331501578209	148.588984416786	rs13081155	rs13083798_PBRM1	0.382079469873273	2.04e-19	5e-8	5e-8	3.20393e-80	rs13083798	PBRM1
32888493	red blood cell count	EUR	ROSMAP_CMC_eQTL	EUR	eQTL	Brain xQTLServe	ROSMAP_CMC_eQTL	ENSG00000163938	GNL3	3	1781	3.54695345286464e-52	4.33112508307376e-39	1.51865753101901e-15	0.0175616327986693	0.982438367201333	55.9423134775814	rs11130324	rs13083798_PBRM1	0.206816119318965	2e-19	5e-8	5e-8	1.67693196e-40	rs13083798	PBRM1
32888493	red blood cell count	EUR	eQTLGen_eQTL	EUR	eQTL	eQTLGen	eQTLGen_eQTL	ENSG00000163938	GNL3	3	2027	1.14054833879553e-76	1.26436573115006e-63	8.20364612464833e-16	0.00810233243006961	0.991897667569941	122.421250440032	rs13083798	rs13083798_PBRM1	0.564108262679359	3.12e-20	5e-8	5e-8	1.1061e-67	rs13083798	PBRM1
30867560	Neuroticism	EUR	Esophagus_Muscularis_eQTL	EUR	eQTL	GTEx v8	Esophagus_Muscularis_eQTL	ENSG00000163938.16	GNL3	3	1914	2.28727424731654e-12	1.40420902036674e-10	0.00546845119284734	0.335061027422563	0.65947052124188	1.96821016850219	rs2577831	rs2071044_ITIH4	0.190214121483497	1.421e-06	5e-8	5e-8	1.64549e-15	rs2071044	ITIH4
34127677	Cataracts	EUR	Testis_eQTL	EUR	eQTL	GTEx v8	Testis_eQTL	ENSG00000163938.16	GNL3	3	1342	1.01324540730657e-17	9.45056932006487e-15	0.000342765501011663	0.319017738061308	0.680639496437667	2.1335474966814	rs145014080	rs35173917_NEK4	0.0360264237260666	1.678e-7	5e-8	5e-8	4.14958e-19	rs35173917	NEK4
34127677	Cataracts	EUR	Stomach_eQTL	EUR	eQTL	GTEx v8	Stomach_eQTL	ENSG00000163938.16	GNL3	3	1342	7.73787065414292e-8	0.000072171344157445	0.000157714840837389	0.146247567295361	0.853522469140937	5.83614814882471	rs4687625	rs35173917_NEK4	0.222952131371149	2.656e-9	5e-8	5e-8	3.75865e-8	rs35173917	NEK4
34127677	Cataracts	EUR	Artery_Aorta_eQTL	EUR	eQTL	GTEx v8	Artery_Aorta_eQTL	ENSG00000163938.16	GNL3	3	1342	1.27955829573554e-9	0.00000119344773592978	0.000348275844097779	0.324162402419115	0.675488127009495	2.08379541232591	rs6445528	rs35173917_NEK4	0.0663631448917649	9.039e-9	5e-8	5e-8	7.72548e-10	rs35173917	NEK4
34127677	Cataracts	EUR	Heart_Left_Ventricle_eQTL	EUR	eQTL	GTEx v8	Heart_Left_Ventricle_eQTL	ENSG00000163938.16	GNL3	3	1342	2.90497434585512e-11	2.70947800311198e-8	0.000344630693678756	0.32075915198125	0.678896190201241	2.11652944587198	rs4687625	rs35173917_NEK4	0.0352343428096883	2.656e-9	5e-8	5e-8	7.1958e-11	rs35173917	NEK4
34127677	Cataracts	EUR	Pituitary_eQTL	EUR	eQTL	GTEx v8	Pituitary_eQTL	ENSG00000163938.16	GNL3	3	1342	3.308187530107e-7	0.000308555611025739	0.000113272592092855	0.104754852392876	0.894822988585252	8.54206719922893	rs67409736	rs35173917_NEK4	0.452717882708128	9.267e-9	5e-8	5e-8	1.38101e-8	rs35173917	NEK4
34127677	Cataracts	EUR	Muscle_Skeletal_eQTL	EUR	eQTL	GTEx v8	Muscle_Skeletal_eQTL	ENSG00000163938.16	GNL3	3	1342	3.55691416886111e-14	3.31754416807065e-11	0.000320250023244271	0.297996442793177	0.701683307150369	2.35467007784844	rs7620039	rs35173917_NEK4	0.159369244405814	1.508e-7	5e-8	5e-8	3.89084e-16	rs35173917	NEK4
34822786	Total hip replacement	EUR	Breast_Mammary_Tissue_eQTL	EUR	eQTL	GTEx v8	Breast_Mammary_Tissue_eQTL	ENSG00000163938.16	GNL3	3	2171	2.12317185683933e-15	0.0000292217694708229	9.34926300766382e-12	0.127804184994603	0.872166593226573	6.8242412661479	rs3774355	rs3774355_ITIH1	0.42771519715584	1.353e-16	5e-8	5e-8	1.05372e-8	rs3774355	ITIH1
34822786	Total hip replacement	EUR	Artery_Coronary_eQTL	EUR	eQTL	GTEx v8	Artery_Coronary_eQTL	ENSG00000163938.16	GNL3	3	2171	1.49406629621995e-16	0.00000205632251301876	2.14954499910275e-11	0.295142643943465	0.704855299712525	2.38818521883114	rs3774355	rs3774355_ITIH1	0.39109697356171	1.353e-16	5e-8	5e-8	4.2392e-10	rs3774355	ITIH1
34822786	Total hip replacement	EUR	PsychENCODE_50PEER_eQTL	EUR	eQTL	PsychENCODE_50PEER	PsychENCODE_50PEER_eQTL	ENSG00000163938	GNL3	3	313	2.49038074810894e-14	0.00000345080570621419	1.27429348168911e-9	0.175748720838189	0.824247827081788	4.68992219773064	rs13081155	rs3774355_ITIH1	0.342498962725576	7.948e-13	5e-8	5e-8	4.51106e-11	rs3774355	ITIH1
31768069	Neuroticism score	EUR	Artery_Aorta_eQTL	EUR	eQTL	GTEx v8	Artery_Aorta_eQTL	ENSG00000163938.16	GNL3	3	1680	1.17158814335604e-8	9.69858381021907e-7	0.00476049381345048	0.393479116961784	0.601759407650504	1.52932997384191	rs2015971	rs2015971_STAB1	0.036594906737406	3.00575e-8	5e-8	5e-8	2.02988e-9	rs2015971	STAB1
31768069	Haemoglobin concentration	EUR	ROSMAP_CMC_eQTL	EUR	eQTL	Brain xQTLServe	ROSMAP_CMC_eQTL	ENSG00000163938	GNL3	3	1623	5.17069071313945e-51	1.02625407702755e-37	1.7860557098244e-14	0.353841676221785	0.646158323778202	1.82612271871897	rs13083798	rs66782572_NT5DC2	0.286810643977144	5.52303e-20	5e-8	5e-8	3.83827361e-39	rs66782572	NT5DC2
31768069	Haemoglobin concentration	EUR	BrainMeta_cis_eQTL	EUR	eQTL	BrainMeta (6 cohorts)	BrainMeta_cis_eQTL	ENSG00000163938.17	GNL3	3	1786	1.18305614676091e-43	2.04815422773666e-30	7.5319702663218e-15	0.129526014688455	0.870473985311532	6.72045679321839	rs13083798	rs66782572_NT5DC2	0.846535769851255	5.52303e-20	5e-8	5e-8	4.61422e-35	rs66782572	NT5DC2
31768069	Haemoglobin concentration	EUR	eQTLGen_eQTL	EUR	eQTL	eQTLGen	eQTLGen_eQTL	ENSG00000163938	GNL3	3	1615	2.95723900350066e-76	5.87293401186644e-63	2.12705954368816e-15	0.0412836601627157	0.95871633983728	23.2226584575735	rs13083798	rs66782572_NT5DC2	0.969573179040631	5.52303e-20	5e-8	5e-8	1.1061e-67	rs66782572	NT5DC2
31768069	Haemoglobin concentration	EUR	PsychENCODE_50PEER_eQTL	EUR	eQTL	PsychENCODE_50PEER	PsychENCODE_50PEER_eQTL	ENSG00000163938	GNL3	3	307	8.30640812392378e-19	0.00000296269751164287	4.29109055316864e-14	0.152205165729812	0.847791871572631	5.57005977758728	rs13081155	rs66782572_NT5DC2	0.317682822918631	6.5444e-18	5e-8	5e-8	4.51106e-11	rs66782572	NT5DC2
31768069	Haemoglobin concentration	EUR	PsychENCODE_100HCP_eQTL	EUR	eQTL	PsychENCODE_100HCP	PsychENCODE_100HCP_eQTL	ENSG00000163938	GNL3	3	718	1.46741704990138e-83	1.19853702731769e-70	3.84542790063346e-14	0.313395047915401	0.686604952084568	2.19086088517236	rs13081155	rs66782572_NT5DC2	0.422294657834124	6.5444e-18	5e-8	5e-8	3.20393e-80	rs66782572	NT5DC2
31768069	Platelet count	EUR	Brain_Cerebellum_eQTL	EUR	eQTL	GTEx v8	Brain_Cerebellum_eQTL	ENSG00000163938.16	GNL3	3	1573	1.24696012583905e-22	7.85886289494126e-20	0.000508298851364396	0.319671319944235	0.679820381204402	2.12662299928249	rs13063160	rs3066857_DNAH1	0.0271752883834394	7.91197e-8	5e-8	5e-8	7.10919e-23	rs3066857	DNAH1
32242144	meta-analysis between the UKB 25OHD GWAS and the SUNLIGHT consortium GWAS	EUR	ROSMAP_CMC_eQTL	EUR	eQTL	Brain xQTLServe	ROSMAP_CMC_eQTL	ENSG00000163938	GNL3	3	1689	3.84914729170276e-44	2.63313431904014e-39	2.06207825504395e-7	0.0131194362118247	0.986880357580348	75.2227718970774	rs11130324	rs4481150_ITIH3	0.267561500906728	3.00481430322948e-11	5e-8	5e-8	1.67693196e-40	rs4481150	ITIH3
32242144	meta-analysis between the UKB 25OHD GWAS and the SUNLIGHT consortium GWAS	EUR	PsychENCODE_50PEER_eQTL	EUR	eQTL	PsychENCODE_50PEER	PsychENCODE_50PEER_eQTL	ENSG00000163938	GNL3	3	253	4.20424461289688e-12	1.47700631638659e-7	2.19407461106453e-7	0.00671478725184573	0.993284845635857	147.924991273972	rs13081155	rs4481150_ITIH3	0.343892031082781	3.51774839924541e-11	5e-8	5e-8	4.51106e-11	rs4481150	ITIH3
32242144	meta-analysis between the UKB 25OHD GWAS and the SUNLIGHT consortium GWAS	EUR	eQTLGen_eQTL	EUR	eQTL	eQTLGen	eQTLGen_eQTL	ENSG00000163938	GNL3	3	1690	4.25857517742196e-68	2.92010794047235e-63	3.06307436190517e-7	0.0200235459078504	0.979976147784712	48.9411891527415	rs2590838	rs4481150_ITIH3	0.503652670737053	4.73583966926259e-11	5e-8	5e-8	4.9534e-68	rs4481150	ITIH3
32242144	meta-analysis between the UKB 25OHD GWAS and the SUNLIGHT consortium GWAS	EUR	PsychENCODE_100HCP_eQTL	EUR	eQTL	PsychENCODE_100HCP	PsychENCODE_100HCP_eQTL	ENSG00000163938	GNL3	3	690	8.56543110911492e-77	3.29267688977936e-72	2.34509502894765e-7	0.00802291113877596	0.991976854351721	123.643006533793	rs13081155	rs4481150_ITIH3	0.441870476595689	3.51774839924541e-11	5e-8	5e-8	3.20393e-80	rs4481150	ITIH3
32242144	meta-analysis between the UKB 25OHD GWAS and the SUNLIGHT consortium GWAS	EUR	BrainMeta_cis_eQTL	EUR	eQTL	BrainMeta (6 cohorts)	BrainMeta_cis_eQTL	ENSG00000163938.17	GNL3	3	1737	3.99896050545706e-36	2.73490809598392e-31	2.46871485220966e-7	0.015899558012487	0.984100195116031	61.8948145818364	rs2590838	rs4481150_ITIH3	0.272485703662791	4.73583966926259e-11	5e-8	5e-8	6.47607e-36	rs4481150	ITIH3
30952852	Sleep efficiency	EUR	Esophagus_Muscularis_eQTL	EUR	eQTL	GTEx v8	Esophagus_Muscularis_eQTL	ENSG00000163938.16	GNL3	3	1306	1.82439084127044e-12	1.6261252607455e-9	0.000355528110735242	0.316207674853184	0.683436795408133	2.16135422938566	rs10433615	rs13094687_PHF7	0.0171428928676309	6e-8	5e-8	5e-8	4.52517e-14	rs13094687	PHF7
30952852	Sleep efficiency	EUR	Esophagus_Muscularis_eQTL	EUR	eQTL	GTEx v8	Esophagus_Muscularis_eQTL	ENSG00000163938.16	GNL3	3	1691	1.77737270696531e-12	1.71675771985378e-9	0.000346311010737223	0.333834704640576	0.665818982630152	1.99445705726434	rs10433615	rs3755799_ITIH1	0.0171430036980342	6e-8	5e-8	5e-8	4.52517e-14	rs3755799	ITIH1
30952852	Sleep efficiency	EUR	Artery_Tibial_eQTL	EUR	eQTL	GTEx v8	Artery_Tibial_eQTL	ENSG00000163938.16	GNL3	3	1306	3.2901141563772e-14	2.93256117022364e-11	0.00016187297673506	0.143425026241295	0.856413100752611	5.97115526624901	rs4687637	rs13094687_PHF7	0.046273146571309	5.4e-8	5e-8	5e-8	2.84397e-16	rs13094687	PHF7
30952852	Sleep efficiency	EUR	Artery_Tibial_eQTL	EUR	eQTL	GTEx v8	Artery_Tibial_eQTL	ENSG00000163938.16	GNL3	3	1691	3.25088724311968e-14	3.14001995705721e-11	0.00015993992335686	0.153639179174574	0.846200880870638	5.50771545003592	rs4687637	rs3755799_ITIH1	0.0462732284570497	5.4e-8	5e-8	5e-8	2.84397e-16	rs3755799	ITIH1
30952852	Sleep efficiency	EUR	Testis_eQTL	EUR	eQTL	GTEx v8	Testis_eQTL	ENSG00000163938.16	GNL3	3	1306	5.27539679831225e-15	4.70209332349957e-12	0.000381752296798328	0.339605372769677	0.660012874928816	1.94347006216666	rs7620039	rs13094687_PHF7	0.0157359844714922	1.2e-7	5e-8	5e-8	1.42809e-18	rs13094687	PHF7
30952852	Sleep efficiency	EUR	Testis_eQTL	EUR	eQTL	GTEx v8	Testis_eQTL	ENSG00000163938.16	GNL3	3	1691	5.12938983990895e-15	4.95445866322459e-12	0.0003711836663159	0.357883183964118	0.641745632364609	1.79317068004221	rs7620039	rs3755799_ITIH1	0.0157359867051938	1.2e-7	5e-8	5e-8	1.42809e-18	rs3755799	ITIH1
30952852	Sleep efficiency	EUR	Artery_Coronary_eQTL	EUR	eQTL	GTEx v8	Artery_Coronary_eQTL	ENSG00000163938.16	GNL3	3	1306	1.84099129152014e-8	0.00001640921657921	0.000175315422684648	0.155418638553383	0.844389618397442	5.43300099818732	rs4687637	rs13094687_PHF7	0.0191436031769405	5.4e-8	5e-8	5e-8	1.48286e-10	rs13094687	PHF7
30952852	Sleep efficiency	EUR	Artery_Coronary_eQTL	EUR	eQTL	GTEx v8	Artery_Coronary_eQTL	ENSG00000163938.16	GNL3	3	1691	1.81721321730357e-8	0.0000175523952134544	0.00017306537323558	0.166329723877693	0.833479640181726	5.01100837992498	rs4687637	rs3755799_ITIH1	0.0191436932024868	5.4e-8	5e-8	5e-8	1.48286e-10	rs3755799	ITIH1
30952852	Sleep efficiency	EUR	Heart_Left_Ventricle_eQTL	EUR	eQTL	GTEx v8	Heart_Left_Ventricle_eQTL	ENSG00000163938.16	GNL3	3	1306	1.05479503959214e-10	9.40165243098575e-8	0.00021652112801629	0.192183105323554	0.807600279426425	4.20224388645803	rs1866268	rs13094687_PHF7	0.0148736333845445	1.3e-7	5e-8	5e-8	1.32523e-12	rs13094687	PHF7
30952852	Sleep efficiency	EUR	Heart_Left_Ventricle_eQTL	EUR	eQTL	GTEx v8	Heart_Left_Ventricle_eQTL	ENSG00000163938.16	GNL3	3	1691	1.03803732274826e-10	1.00263640841381e-7	0.000213079482168888	0.205017914344215	0.79476890580617	3.87658272862825	rs1866268	rs3755799_ITIH1	0.0148736499281088	1.3e-7	5e-8	5e-8	1.32523e-12	rs3755799	ITIH1
31043756	bipolar disorder	EUR	Artery_Coronary_eQTL	EUR	eQTL	GTEx v8	Artery_Coronary_eQTL	ENSG00000163938.16	GNL3	3	2083	1.69422567698051e-9	0.00000282437905893371	0.000233800182008372	0.389148758655779	0.610614615088928	1.56910333518254	rs12629699	rs2302417_ITIH1	0.106995564985417	3.03899510115528e-8	5e-8	5e-8	1.51399e-10	rs2302417	ITIH1
31043756	bipolar disorder	EUR	Artery_Aorta_eQTL	EUR	eQTL	GTEx v8	Artery_Aorta_eQTL	ENSG00000163938.16	GNL3	3	2083	6.17281580642675e-10	0.00000102904659840823	0.000235200167990353	0.391484957735347	0.608278812432782	1.5537731409951	rs12629699	rs2302417_ITIH1	0.11140987972699	3.03899510115528e-8	5e-8	5e-8	1.06897e-10	rs2302417	ITIH1
31043756	bipolar disorder	EUR	ROSMAP_CMC_eQTL	EUR	eQTL	Brain xQTLServe	ROSMAP_CMC_eQTL	ENSG00000163938	GNL3	3	2002	4.00173298008202e-42	7.31901794770536e-39	0.0000216189967681305	0.038578926235351	0.961399454767882	24.9203269397095	rs7646741	rs2302417_ITIH1	0.401339562111674	9.51699848112944e-9	5e-8	5e-8	1.67693196e-40	rs2302417	ITIH1
31043756	bipolar disorder	EUR	Brain_Cerebellum_eQTL	EUR	eQTL	GTEx v8	Brain_Cerebellum_eQTL	ENSG00000163938.16	GNL3	3	2083	2.74121436978522e-23	4.56977400783341e-20	0.000229684713425063	0.382281143264654	0.617489172021922	1.61527499564485	rs12629699	rs2302417_ITIH1	0.155434104483832	3.03899510115528e-8	5e-8	5e-8	7.10919e-23	rs2302417	ITIH1
31043756	bipolar disorder	EUR	PsychENCODE_50PEER_eQTL	EUR	eQTL	PsychENCODE_50PEER	PsychENCODE_50PEER_eQTL	ENSG00000163938	GNL3	3	309	5.86983363138329e-10	3.74237965668408e-7	0.0000299701725075032	0.0181259830473108	0.981843671955234	54.1677474480978	rs7646741	rs2302417_ITIH1	0.360667148121216	9.51699848112944e-9	5e-8	5e-8	1.03582e-10	rs2302417	ITIH1
31043756	bipolar disorder	EUR	PsychENCODE_100HCP_eQTL	EUR	eQTL	PsychENCODE_100HCP	PsychENCODE_100HCP_eQTL	ENSG00000163938	GNL3	3	797	1.38840071382925e-74	1.49336555661898e-71	0.0000383120347757247	0.0402487599344302	0.959712928030803	23.8445340823987	rs13081155	rs2302417_ITIH1	0.402345766170333	3.29397273432242e-8	5e-8	5e-8	3.20393e-80	rs2302417	ITIH1
31043756	bipolar disorder	EUR	BrainMeta_cis_eQTL	EUR	eQTL	BrainMeta (6 cohorts)	BrainMeta_cis_eQTL	ENSG00000163938.17	GNL3	3	2131	6.16398455052992e-34	1.13557861487711e-30	0.0000384564219031995	0.0699174571686205	0.930044086409477	13.3020296228234	rs2590838	rs2302417_ITIH1	0.183524243258358	5.93594680011395e-8	5e-8	5e-8	6.47607e-36	rs2302417	ITIH1
31043756	bipolar disorder	EUR	eQTLGen_eQTL	EUR	eQTL	eQTLGen	eQTLGen_eQTL	ENSG00000163938	GNL3	3	2144	7.4641222178858e-66	1.32749210429026e-62	0.0000536873495176232	0.094577436072862	0.905368876577612	9.57277881671608	rs2590838	rs2302417_ITIH1	0.377772766723857	5.93594680011395e-8	5e-8	5e-8	4.9534e-68	rs2302417	ITIH1
31768069	Haematocrit percentage	EUR	PsychENCODE_50PEER_eQTL	EUR	eQTL	PsychENCODE_50PEER	PsychENCODE_50PEER_eQTL	ENSG00000163938	GNL3	3	303	2.71411397805352e-17	7.5720689372982e-7	1.40205965781556e-12	0.0381540226801671	0.961845220111539	25.2095363095624	rs7646741	rs1010554_STAB1	0.281695178280439	1.03239e-16	5e-8	5e-8	1.03582e-10	rs1010554	STAB1
31768069	Haematocrit percentage	EUR	PsychENCODE_100HCP_eQTL	EUR	eQTL	PsychENCODE_100HCP	PsychENCODE_100HCP_eQTL	ENSG00000163938	GNL3	3	705	4.32517620126246e-82	1.24222584919856e-70	1.11915337698401e-12	0.320750720140018	0.679249279858857	2.11768590749334	rs13081155	rs1010554_STAB1	0.377768346871963	2.26083e-16	5e-8	5e-8	3.20393e-80	rs1010554	STAB1
31768069	Haematocrit percentage	EUR	BrainMeta_cis_eQTL	EUR	eQTL	BrainMeta (6 cohorts)	BrainMeta_cis_eQTL	ENSG00000163938.17	GNL3	3	1788	5.33485857377959e-42	3.64346843492521e-30	3.39466828265134e-13	0.231071645558272	0.768928354441388	3.3276620875904	rs13083798	rs1010554_STAB1	0.720562756152009	3.48537e-18	5e-8	5e-8	4.61422e-35	rs1010554	STAB1
31768069	Haematocrit percentage	EUR	eQTLGen_eQTL	EUR	eQTL	eQTLGen	eQTLGen_eQTL	ENSG00000163938	GNL3	3	1618	1.62752831120817e-74	1.27251946549548e-62	1.17063572571577e-13	0.0906193957444576	0.909380604255439	10.0351651739088	rs13083798	rs1010554_STAB1	0.938120813314213	3.48537e-18	5e-8	5e-8	1.1061e-67	rs1010554	STAB1
25673412	Waist-to-hip ratio adjusted for body mass index	EUR	Esophagus_Muscularis_eQTL	EUR	eQTL	GTEx v8	Esophagus_Muscularis_eQTL	ENSG00000163938.16	GNL3	3	502	2.80253791382389e-16	1.90091645707177e-11	1.89143766987912e-7	0.0118411592908215	0.988158651546399	83.451174608584	rs13083798	rs2276824_PBRM1	0.553101386977173	4.1e-11	5e-8	5e-8	3.73176e-15	rs2276824	PBRM1
25673412	Waist-to-hip ratio adjusted for body mass index	EUR	Heart_Atrial_Appendage_eQTL	EUR	eQTL	GTEx v8	Heart_Atrial_Appendage_eQTL	ENSG00000163938.16	GNL3	3	502	1.60397804161502e-9	0.000108795254510136	5.02308942926044e-7	0.0331040221918666	0.966786678640701	29.204507930708	rs13083798	rs2276824_PBRM1	0.785401291442305	4.1e-11	5e-8	5e-8	3.35323e-8	rs2276824	PBRM1
25673412	Waist-to-hip ratio adjusted for body mass index	EUR	Testis_eQTL	EUR	eQTL	GTEx v8	Testis_eQTL	ENSG00000163938.16	GNL3	3	502	1.81710529786979e-19	1.23251334011035e-14	0.00000249995290473916	0.168736529534021	0.831260970513062	4.92638418491038	rs12489828	rs2276824_PBRM1	0.594220552473097	7.1e-11	5e-8	5e-8	8.24403e-19	rs2276824	PBRM1
25673412	Waist-to-hip ratio adjusted for body mass index	EUR	Esophagus_Gastroesophageal_Junction_eQTL	EUR	eQTL	GTEx v8	Esophagus_Gastroesophageal_Junction_eQTL	ENSG00000163938.16	GNL3	3	502	8.97975562198483e-11	0.00000609082401994094	7.63905507357951e-7	0.0508653559121545	0.94912778926852	18.6596116796604	rs2276824	rs2276824_PBRM1	0.810686656042743	3.2e-11	5e-8	5e-8	4.47958e-10	rs2276824	PBRM1
30664745	Osteoarthritis of the hip or knee	EUR	Stomach_eQTL	EUR	eQTL	GTEx v8	Stomach_eQTL	ENSG00000163938.16	GNL3	3	2227	1.84712401438798e-10	0.0000756722236078166	5.65692773594465e-7	0.230981767342357	0.768941994556548	3.32901597993592	rs3774354	rs3774354_ITIH1	0.115078534031557	1.367e-11	5e-8	5e-8	4.23568e-8	rs3774354	ITIH1
30664745	Osteoarthritis of the hip or knee	EUR	Breast_Mammary_Tissue_eQTL	EUR	eQTL	GTEx v8	Breast_Mammary_Tissue_eQTL	ENSG00000163938.16	GNL3	3	2227	9.50680187566613e-11	0.0000389470783621955	4.1110420926118e-7	0.167587122990463	0.832373518731896	4.96681071838237	rs3774355	rs3774354_ITIH1	0.179881020517948	1.579e-11	5e-8	5e-8	1.05372e-8	rs3774354	ITIH1
30664745	Osteoarthritis of the hip or knee	EUR	Heart_Left_Ventricle_eQTL	EUR	eQTL	GTEx v8	Heart_Left_Ventricle_eQTL	ENSG00000163938.16	GNL3	3	2227	4.40106951906676e-14	1.80301221881258e-8	7.40712298884933e-7	0.302754750468262	0.697244490789274	2.3030009924233	rs13082208	rs3774354_ITIH1	0.0338339607768395	1.716e-10	5e-8	5e-8	1.51519e-12	rs3774354	ITIH1
30664745	Osteoarthritis of the hip or knee	EUR	Adipose_Subcutaneous_eQTL	EUR	eQTL	GTEx v8	Adipose_Subcutaneous_eQTL	ENSG00000163938.16	GNL3	3	2227	2.20247932744664e-11	0.00000902302752061607	7.65087509018998e-7	0.312750692157101	0.687239519705843	2.19740367308485	rs13087772	rs3774354_ITIH1	0.0311989257107915	1.5e-10	5e-8	5e-8	2.69629e-9	rs3774354	ITIH1
30664745	Osteoarthritis of the hip or knee	EUR	Testis_eQTL	EUR	eQTL	GTEx v8	Testis_eQTL	ENSG00000163938.16	GNL3	3	2227	8.80478159870602e-21	3.60710703106762e-15	4.41749905998304e-7	0.180154455512978	0.819845102737113	4.55079004514574	rs11717836	rs3774354_ITIH1	0.0350447372783486	1.728e-10	5e-8	5e-8	3.19712e-19	rs3774354	ITIH1
30664745	Osteoarthritis of the hip or knee	EUR	Muscle_Skeletal_eQTL	EUR	eQTL	GTEx v8	Muscle_Skeletal_eQTL	ENSG00000163938.16	GNL3	3	2227	5.37812561833707e-17	2.20328857841511e-11	6.89662010740136e-7	0.2818197414588	0.718179568857156	2.54836501211591	rs7620039	rs3774354_ITIH1	0.0730328315820346	3.757e-10	5e-8	5e-8	3.89084e-16	rs3774354	ITIH1
30664745	Osteoarthritis of the hip or knee	EUR	PsychENCODE_50PEER_eQTL	EUR	eQTL	PsychENCODE_50PEER	PsychENCODE_50PEER_eQTL	ENSG00000163938	GNL3	3	313	1.00722920151091e-9	0.00000337000332537548	0.0000515385290794153	0.171610087276522	0.828335003183843	4.82684331865127	rs13081155	rs3774354_ITIH1	0.39390890041977	2.585e-8	5e-8	5e-8	4.51106e-11	rs3774354	ITIH1
34822786	Knee and/or hip osteoarthritis	EUR	Breast_Mammary_Tissue_eQTL	EUR	eQTL	GTEx v8	Breast_Mammary_Tissue_eQTL	ENSG00000163938.16	GNL3	3	1844	3.25185841964574e-8	0.0000697372509597315	0.000136242624941529	0.291468790188653	0.708325197416862	2.43019225817762	rs3774355	rs1546737_DNAH1	0.0499376093048933	1.824e-8	5e-8	5e-8	1.05372e-8	rs1546737	DNAH1
34822786	Knee and/or hip osteoarthritis	EUR	Adipose_Subcutaneous_eQTL	EUR	eQTL	GTEx v8	Adipose_Subcutaneous_eQTL	ENSG00000163938.16	GNL3	3	1844	4.52656275155439e-9	0.00000970737350319546	0.000161570794939101	0.345840281005447	0.653988436299549	1.89101291034762	rs9714129	rs1546737_DNAH1	0.0171895012874414	7.754e-8	5e-8	5e-8	1.63761e-9	rs1546737	DNAH1
34822786	Knee and/or hip osteoarthritis	EUR	Heart_Left_Ventricle_eQTL	EUR	eQTL	GTEx v8	Heart_Left_Ventricle_eQTL	ENSG00000163938.16	GNL3	3	1844	1.01981708623297e-11	2.18703371727355e-8	0.000163853423188873	0.350740350472897	0.649095774223378	1.85064471010596	rs34017441	rs1546737_DNAH1	0.0182368959480491	4.707e-8	5e-8	5e-8	2.0989e-12	rs1546737	DNAH1
34822786	Knee and/or hip osteoarthritis	EUR	Muscle_Skeletal_eQTL	EUR	eQTL	GTEx v8	Muscle_Skeletal_eQTL	ENSG00000163938.16	GNL3	3	1844	1.12043413308002e-14	2.40281052368088e-11	0.000148065373347104	0.31684841288842	0.68300352171419	2.15561604203053	rs7620039	rs1546737_DNAH1	0.033346516944488	2.176e-7	5e-8	5e-8	3.89084e-16	rs1546737	DNAH1
30643256	Depression symptoms	EUR	Artery_Coronary_eQTL	EUR	eQTL	GTEx v8	Artery_Coronary_eQTL	ENSG00000163938.16	GNL3	3	784	4.23286373568367e-8	0.00000339205891876081	0.003735146131915	0.298623023472424	0.697638396008107	2.33618422282343	rs7611731	rs352139_TLR9	0.0712070808316798	1.256e-7	5e-8	5e-8	1.51399e-10	rs352139	TLR9
30643256	Depression symptoms	EUR	Esophagus_Gastroesophageal_Junction_eQTL	EUR	eQTL	GTEx v8	Esophagus_Gastroesophageal_Junction_eQTL	ENSG00000163938.16	GNL3	3	784	2.9447744201728e-7	0.0000235983224583356	0.00383777904887038	0.306855998214075	0.689282329937153	2.24627295522599	rs352139	rs352139_TLR9	0.341399779882246	1.318e-8	5e-8	5e-8	5.13108e-9	rs352139	TLR9
30643256	Depression symptoms	EUR	Artery_Aorta_eQTL	EUR	eQTL	GTEx v8	Artery_Aorta_eQTL	ENSG00000163938.16	GNL3	3	784	1.30039858720377e-8	0.00000104209086356428	0.00345269470324051	0.275965478435702	0.720580771766208	2.61112649252648	rs6445528	rs352139_TLR9	0.0890013508146201	1.654e-8	5e-8	5e-8	7.72548e-10	rs352139	TLR9
30643256	Depression symptoms	EUR	Artery_Aorta_eQTL	EUR	eQTL	GTEx v8	Artery_Aorta_eQTL	ENSG00000163938.16	GNL3	3	1474	7.23795031920665e-9	0.00000106581901589254	0.00260968094129724	0.383672918697821	0.613716327303917	1.59958208514393	rs6445528	rs17304995_SFMBT1	0.0639417075461309	1.654e-8	5e-8	5e-8	7.72548e-10	rs17304995	SFMBT1
30643256	Depression symptoms	EUR	Colon_Transverse_eQTL	EUR	eQTL	GTEx v8	Colon_Transverse_eQTL	ENSG00000163938.16	GNL3	3	784	6.4211678112921e-8	0.00000514568408133158	0.00417823901608698	0.334166821117154	0.661649729971001	1.97999827678594	rs7611731	rs352139_TLR9	0.0491519870433069	1.256e-7	5e-8	5e-8	9.94713e-10	rs352139	TLR9
30643256	Depression symptoms	EUR	Stomach_eQTL	EUR	eQTL	GTEx v8	Stomach_eQTL	ENSG00000163938.16	GNL3	3	784	0.00000167938281463634	0.000134579467001924	0.00387796202879715	0.310079488198501	0.685906290922885	2.21203374305041	rs4434138	rs352139_TLR9	0.244753254314993	2.809e-8	5e-8	5e-8	2.35564e-8	rs352139	TLR9
30643256	Depression symptoms	EUR	Artery_Tibial_eQTL	EUR	eQTL	GTEx v8	Artery_Tibial_eQTL	ENSG00000163938.16	GNL3	3	784	1.00699249489861e-13	8.06966178629966e-12	0.00385144332536859	0.307952088163959	0.688196468502501	2.23475175182476	rs2878628	rs352139_TLR9	0.0992080922067748	2.338e-7	5e-8	5e-8	2.91694e-16	rs352139	TLR9
30643256	Depression symptoms	EUR	Heart_Left_Ventricle_eQTL	EUR	eQTL	GTEx v8	Heart_Left_Ventricle_eQTL	ENSG00000163938.16	GNL3	3	784	3.72733062311328e-10	2.98694356180582e-8	0.00439617654597207	0.351649216013212	0.643954577198647	1.83124132764866	rs1961958	rs352139_TLR9	0.0519313280276837	1.889e-7	5e-8	5e-8	1.89996e-12	rs352139	TLR9
34349265	Age at Natural Menopause	EUR	Esophagus_Mucosa_eQTL	EUR	eQTL	GTEx v8	Esophagus_Mucosa_eQTL	ENSG00000163938.16	GNL3	3	2166	4.90409316609355e-15	2.4288351270133e-13	0.00526286885143036	0.259917666168781	0.734819464979539	2.82712397279827	rs35911561	rs9968117_ITIH3	0.999997022507059	4.149e-06	5e-8	5e-8	1.53525e-21	rs9968117	ITIH3
34349265	Age at Natural Menopause	EUR	Skin_Sun_Exposed_Lower_leg_eQTL	EUR	eQTL	GTEx v8	Skin_Sun_Exposed_Lower_leg_eQTL	ENSG00000163938.16	GNL3	3	2166	4.0558754797603e-17	2.00874096441378e-15	0.00526288085815052	0.259918261429182	0.734818857712664	2.82711516179049	rs35911561	rs9968117_ITIH3	0.999999963680857	4.149e-06	5e-8	5e-8	7.77772e-24	rs9968117	ITIH3
31768069	Impedance of leg (left)	EUR	Brain_Cerebellar_Hemisphere_eQTL	EUR	eQTL	GTEx v8	Brain_Cerebellar_Hemisphere_eQTL	ENSG00000163938.16	GNL3	3	1836	2.70542861201199e-26	7.60119704044344e-11	2.05624803899357e-17	0.0568293628499279	0.943170637074061	16.5965372436911	rs13081155	rs772585020_GNL3	0.149860290116531	2.55322e-21	5e-8	5e-8	3.84267e-15	rs772585020	GNL3
31768069	Impedance of leg (left)	EUR	Brain_Hypothalamus_eQTL	EUR	eQTL	GTEx v8	Brain_Hypothalamus_eQTL	ENSG00000163938.16	GNL3	3	1836	4.10358256600851e-21	0.0000115294632123973	3.13143458232743e-17	0.0870681528988081	0.912920317637977	10.4851232884082	rs13083798	rs772585020_GNL3	0.304469228181154	4.12427e-21	5e-8	5e-8	8.56547e-11	rs772585020	GNL3
31768069	Impedance of leg (left)	EUR	Esophagus_Gastroesophageal_Junction_eQTL	EUR	eQTL	GTEx v8	Esophagus_Gastroesophageal_Junction_eQTL	ENSG00000163938.16	GNL3	3	1836	3.38002428255376e-21	0.00000949654722327626	7.18737367110355e-17	0.201138257588735	0.798852245864039	3.97165738353686	rs3216517	rs772585020_GNL3	0.671237986716335	2.59876e-22	5e-8	5e-8	1.03328e-9	rs772585020	GNL3
31768069	Impedance of leg (left)	EUR	Esophagus_Muscularis_eQTL	EUR	eQTL	GTEx v8	Esophagus_Muscularis_eQTL	ENSG00000163938.16	GNL3	3	1836	3.14174144591217e-27	8.82706558009902e-12	1.12679251873858e-17	0.0306891551024344	0.969310844888741	31.5848006128996	rs2577831	rs772585020_GNL3	0.647844480281666	1.11295e-22	5e-8	5e-8	1.64549e-15	rs772585020	GNL3
31768069	Impedance of leg (left)	EUR	Heart_Atrial_Appendage_eQTL	EUR	eQTL	GTEx v8	Heart_Atrial_Appendage_eQTL	ENSG00000163938.16	GNL3	3	1836	1.04693600481018e-19	0.000294148100081583	1.01763842829159e-16	0.285202122383893	0.714503729516028	2.50525390044005	rs13081155	rs772585020_GNL3	0.130612617216646	2.55322e-21	5e-8	5e-8	4.08017e-8	rs772585020	GNL3
32888493	RBC distribution width	EUR	Brain_Hypothalamus_eQTL	EUR	eQTL	GTEx v8	Brain_Hypothalamus_eQTL	ENSG00000163938.16	GNL3	3	2386	3.29290318612086e-21	0.00000902559346069252	2.46503955778097e-17	0.0666314720627941	0.933359502343743	14.007787513146	rs10933	rs10933_PBRM1	0.32852845950754	2.13e-22	5e-8	5e-8	7.98284e-10	rs10933	PBRM1
32888493	RBC distribution width	EUR	Esophagus_Gastroesophageal_Junction_eQTL	EUR	eQTL	GTEx v8	Esophagus_Gastroesophageal_Junction_eQTL	ENSG00000163938.16	GNL3	3	2396	7.81309294843909e-22	0.00000214150824497631	1.66669471612691e-17	0.0447275405739876	0.955270317917766	21.3575418111258	rs10933	rs10933_PBRM1	0.350255780698322	2.13e-22	5e-8	5e-8	4.47958e-10	rs10933	PBRM1
32888493	RBC distribution width	EUR	Esophagus_Muscularis_eQTL	EUR	eQTL	GTEx v8	Esophagus_Muscularis_eQTL	ENSG00000163938.16	GNL3	3	2396	3.84281216299885e-26	1.0532850415662e-10	1.37490265593327e-16	0.376226392280809	0.623773607613865	1.65797408265896	rs2080656387	rs10933_PBRM1	0.640256279866857	1.14e-20	5e-8	5e-8	4.17703e-16	rs10933	PBRM1
31768069	Mean sphered cell volume	EUR	Brain_Hypothalamus_eQTL	EUR	eQTL	GTEx v8	Brain_Hypothalamus_eQTL	ENSG00000163938.16	GNL3	3	1820	2.72394856585615e-7	0.00000987352154329885	0.0020782260141183	0.0744061449348123	0.92350548313467	12.4116829859114	rs2276824	rs2878632_PBRM1	0.344239511372589	3.10263e-8	5e-8	5e-8	7.98284e-10	rs2878632	PBRM1
31768069	Mean sphered cell volume	EUR	Esophagus_Gastroesophageal_Junction_eQTL	EUR	eQTL	GTEx v8	Esophagus_Gastroesophageal_Junction_eQTL	ENSG00000163938.16	GNL3	3	1820	6.32210840043898e-8	0.0000022915804752424	0.00133784606116508	0.0475419119449592	0.951117887192317	20.0058821423391	rs2276824	rs2878632_PBRM1	0.350185130503703	3.10263e-8	5e-8	5e-8	4.47958e-10	rs2878632	PBRM1
31768069	Age when periods started (menarche)	EUR	Brain_Cerebellar_Hemisphere_eQTL	EUR	eQTL	GTEx v8	Brain_Cerebellar_Hemisphere_eQTL	ENSG00000163938.16	GNL3	3	1682	5.32408246149381e-17	1.33640028495538e-10	3.87828006584187e-8	0.0964453242096357	0.903554636873926	9.36856860898658	rs2336147	rs11709284_NT5DC2	0.235728624726093	5.95729e-12	5e-8	5e-8	3.84267e-15	rs11709284	NT5DC2
31768069	Age when periods started (menarche)	EUR	Brain_Hypothalamus_eQTL	EUR	eQTL	GTEx v8	Brain_Hypothalamus_eQTL	ENSG00000163938.16	GNL3	3	1682	5.29217145353066e-12	0.0000132839028878353	4.25523361662597e-8	0.10591673659995	0.894069936939534	8.44125268243919	rs13083798	rs11709284_NT5DC2	0.17271882578838	1.92659e-11	5e-8	5e-8	8.56547e-11	rs11709284	NT5DC2
31768069	Age when periods started (menarche)	EUR	Pituitary_eQTL	EUR	eQTL	GTEx v8	Pituitary_eQTL	ENSG00000163938.16	GNL3	3	1682	4.18726096419159e-11	0.000105104621992615	2.43931269701314e-8	0.0602896903263693	0.939605180616639	15.584840053585	rs13081028	rs11709284_NT5DC2	0.26211307626989	1.09558e-12	5e-8	5e-8	1.00077e-8	rs11709284	NT5DC2
31768069	Age when periods started (menarche)	EUR	Esophagus_Gastroesophageal_Junction_eQTL	EUR	eQTL	GTEx v8	Esophagus_Gastroesophageal_Junction_eQTL	ENSG00000163938.16	GNL3	3	1682	4.76325057536324e-12	0.0000119562562606201	9.74074237201017e-8	0.24374656216518	0.756241384166372	3.10257251404387	rs2276824	rs11709284_NT5DC2	0.331031575066935	3.22234e-12	5e-8	5e-8	4.47958e-10	rs11709284	NT5DC2
31768069	Age when periods started (menarche)	EUR	Esophagus_Muscularis_eQTL	EUR	eQTL	GTEx v8	Esophagus_Muscularis_eQTL	ENSG00000163938.16	GNL3	3	1682	1.26150251734056e-17	3.16650302815337e-11	4.44154276391692e-8	0.110597958656692	0.889401996896214	8.04175780185069	rs34372721	rs11709284_NT5DC2	0.310343567815502	8.94966e-12	5e-8	5e-8	4.17703e-16	rs11709284	NT5DC2
31768069	Age when periods started (menarche)	EUR	Heart_Atrial_Appendage_eQTL	EUR	eQTL	GTEx v8	Heart_Atrial_Appendage_eQTL	ENSG00000163938.16	GNL3	3	1682	1.34010332202754e-10	0.00033637992543879	1.3007150401865e-7	0.325819211176963	0.673844278692083	2.06815391964747	rs2336147	rs11709284_NT5DC2	0.141440010453895	5.95729e-12	5e-8	5e-8	4.08017e-8	rs11709284	NT5DC2
32888493	hemoglobin concentration	EUR	Pituitary_eQTL	EUR	eQTL	GTEx v8	Pituitary_eQTL	ENSG00000163938.16	GNL3	3	2191	2.28553326207018e-23	0.0000883633262494616	1.27948268032224e-20	0.0485159857204491	0.951395650953303	19.6099416888132	rs66782572	rs66782572_NT5DC2	0.311038358399332	6.9e-26	5e-8	5e-8	4.42564e-8	rs66782572	NT5DC2
31768069	Body mass index (BMI)	EUR	Artery_Tibial_eQTL	EUR	eQTL	GTEx v8	Artery_Tibial_eQTL	ENSG00000163938.16	GNL3	3	766	6.86043760386067e-10	2.40462536306481e-7	0.000194053547818782	0.0670842345635461	0.932721470740053	13.9037357556271	rs353547	rs62259687_IQCF6	0.911025288265916	1.40872e-9	5e-8	5e-8	5.77876e-11	rs62259687	IQCF6
31768069	Body mass index (BMI)	EUR	Esophagus_Muscularis_eQTL	EUR	eQTL	GTEx v8	Esophagus_Muscularis_eQTL	ENSG00000163938.16	GNL3	3	766	2.0273802113926e-9	7.10609170783352e-7	0.000198448776317987	0.0686263360175856	0.931174502569547	13.568763198008	rs353547	rs62259687_IQCF6	0.996381219416265	1.40872e-9	5e-8	5e-8	1.44398e-10	rs62259687	IQCF6
32242144	25 hydroxyvitamin D conditioned on BMI with mtCOJO	EUR	Testis_eQTL	EUR	eQTL	GTEx v8	Testis_eQTL	ENSG00000163938.16	GNL3	3	1846	6.51291956270167e-19	6.60946665655336e-15	0.0000295662540291506	0.299344796824575	0.700625636921392	2.34053053319641	rs2590838	rs11130324_NEK4	0.210599625920771	3.53224e-10	5e-8	5e-8	8.50042e-19	rs11130324	NEK4
32242144	25 hydroxyvitamin D conditioned on BMI with mtCOJO	EUR	Brain_Cerebellar_Hemisphere_eQTL	EUR	eQTL	GTEx v8	Brain_Cerebellar_Hemisphere_eQTL	ENSG00000163938.16	GNL3	3	1846	2.140395395328e-15	2.17212447675192e-11	0.0000014836510917366	0.014070518387411	0.985927997939775	70.0704814700994	rs35212380	rs11130324_NEK4	0.284158073913049	1.6709e-10	5e-8	5e-8	3.84267e-15	rs11130324	NEK4
32242144	25 hydroxyvitamin D conditioned on BMI with mtCOJO	EUR	Brain_Hypothalamus_eQTL	EUR	eQTL	GTEx v8	Brain_Hypothalamus_eQTL	ENSG00000163938.16	GNL3	3	1846	3.39569505695286e-10	0.00000344603261850249	0.00000246126971121809	0.0240015615944905	0.975992530763611	40.6637096057804	rs7646741	rs11130324_NEK4	0.200827588631134	1.35673e-10	5e-8	5e-8	4.28093e-10	rs11130324	NEK4
32242144	25 hydroxyvitamin D conditioned on BMI with mtCOJO	EUR	Pituitary_eQTL	EUR	eQTL	GTEx v8	Pituitary_eQTL	ENSG00000163938.16	GNL3	3	1846	3.39490713189518e-8	0.000344523301329526	0.0000180179480782891	0.182032845048033	0.817604579753489	4.4915222829031	rs67409736	rs11130324_NEK4	0.115892761290484	1.56631e-9	5e-8	5e-8	1.38101e-8	rs11130324	NEK4
32242144	25 hydroxyvitamin D conditioned on BMI with mtCOJO	EUR	Esophagus_Gastroesophageal_Junction_eQTL	EUR	eQTL	GTEx v8	Esophagus_Gastroesophageal_Junction_eQTL	ENSG00000163938.16	GNL3	3	1846	1.83797512399035e-9	0.00001865221147081	0.000036796574691051	0.372793295835461	0.627151253540403	1.68230292912029	rs3774349	rs11130324_NEK4	0.109685970677481	2.50574e-10	5e-8	5e-8	9.81284e-9	rs11130324	NEK4
32242144	25 hydroxyvitamin D conditioned on BMI with mtCOJO	EUR	Esophagus_Muscularis_eQTL	EUR	eQTL	GTEx v8	Esophagus_Muscularis_eQTL	ENSG00000163938.16	GNL3	3	1846	7.39084129796056e-16	7.50040264622648e-12	0.00000197140211180332	0.0190252877375398	0.980972740852848	51.5615192992451	rs13081155	rs11130324_NEK4	0.158247816323353	2.32463e-10	5e-8	5e-8	1.38344e-15	rs11130324	NEK4
32242144	25 hydroxyvitamin D conditioned on BMI with mtCOJO	EUR	Heart_Atrial_Appendage_eQTL	EUR	eQTL	GTEx v8	Heart_Atrial_Appendage_eQTL	ENSG00000163938.16	GNL3	3	1846	9.03316207345597e-9	0.0000916706907754026	0.00000800543455255527	0.0803214870827579	0.919578827758752	11.4487276214306	rs7646741	rs11130324_NEK4	0.240048600799707	1.35673e-10	5e-8	5e-8	4.25618e-8	rs11130324	NEK4
31768069	Platelet count	EUR	Artery_Tibial_eQTL	EUR	eQTL	GTEx v8	Artery_Tibial_eQTL	ENSG00000163938.16	GNL3	3	1573	1.01732734799199e-14	6.41162133533625e-12	0.00048548150793261	0.305276460588499	0.694238057897144	2.27412901918092	rs34140775	rs3066857_DNAH1	0.0374962437507047	1.02814e-7	5e-8	5e-8	2.84397e-16	rs3066857	DNAH1
31768069	Platelet count	EUR	Pituitary_eQTL	EUR	eQTL	GTEx v8	Pituitary_eQTL	ENSG00000163938.16	GNL3	3	1573	3.87233525566271e-7	0.000244050721646159	0.000222792640707028	0.139553236658936	0.859979532745185	6.16237611777466	rs3066857	rs3066857_DNAH1	0.788298860144686	4.85606e-10	5e-8	5e-8	7.97688e-8	rs3066857	DNAH1
31768069	Haemoglobin concentration	EUR	Brain_Cerebellar_Hemisphere_eQTL	EUR	eQTL	GTEx v8	Brain_Cerebellar_Hemisphere_eQTL	ENSG00000163938.16	GNL3	3	1680	7.51910111934143e-24	1.56032944931893e-10	5.50179010623629e-15	0.113283914026467	0.886716085817493	7.82737861273336	rs13083798	rs66782572_NT5DC2	0.904236740723521	5.52303e-20	5e-8	5e-8	7.96883e-15	rs66782572	NT5DC2
31768069	Haemoglobin concentration	EUR	Brain_Hypothalamus_eQTL	EUR	eQTL	GTEx v8	Brain_Hypothalamus_eQTL	ENSG00000163938.16	GNL3	3	1680	1.72462705435648e-19	0.00000357886712692628	1.3856244499969e-15	0.0277816295937305	0.972214791539141	34.9948799172869	rs13083798	rs66782572_NT5DC2	0.983979659954905	5.52303e-20	5e-8	5e-8	8.56547e-11	rs66782572	NT5DC2
31768069	Haemoglobin concentration	EUR	Pituitary_eQTL	EUR	eQTL	GTEx v8	Pituitary_eQTL	ENSG00000163938.16	GNL3	3	1680	3.87442769386354e-18	0.0000804003501753888	2.25514944677437e-15	0.0458437532899706	0.954075846359854	20.8114689110453	rs13081028	rs66782572_NT5DC2	0.326367487814714	4.62052e-20	5e-8	5e-8	1.00077e-8	rs66782572	NT5DC2
31768069	Haemoglobin concentration	EUR	Esophagus_Muscularis_eQTL	EUR	eQTL	GTEx v8	Esophagus_Muscularis_eQTL	ENSG00000163938.16	GNL3	3	1680	2.7098271584976e-24	5.62330929037746e-11	9.52322454027154e-15	0.196818415289999	0.80318158465376	4.08082538145795	rs13083798	rs66782572_NT5DC2	0.721057323647184	5.52303e-20	5e-8	5e-8	3.73176e-15	rs66782572	NT5DC2
31768069	Haemoglobin concentration	EUR	Heart_Atrial_Appendage_eQTL	EUR	eQTL	GTEx v8	Heart_Atrial_Appendage_eQTL	ENSG00000163938.16	GNL3	3	1680	1.21944694061493e-17	0.000253054047701117	1.18327545860201e-14	0.244792953318235	0.754953992634049	3.08405116405699	rs13083798	rs66782572_NT5DC2	0.845196549482149	5.52303e-20	5e-8	5e-8	3.35323e-8	rs66782572	NT5DC2
31768069	Monocyte percentage	EUR	Esophagus_Mucosa_eQTL	EUR	eQTL	GTEx v8	Esophagus_Mucosa_eQTL	ENSG00000163938.16	GNL3	3	1673	8.37768183909267e-17	2.27460806124444e-14	0.0000989526451776616	0.0258924311371148	0.974008616217683	37.6175033954814	rs35911561	rs13326165_STAB1	0.999999984559239	3.22836e-8	5e-8	5e-8	1.53525e-21	rs13326165	STAB1
31768069	Monocyte percentage	EUR	Skin_Not_Sun_Exposed_Suprapubic_eQTL	EUR	eQTL	GTEx v8	Skin_Not_Sun_Exposed_Suprapubic_eQTL	ENSG00000163938.16	GNL3	3	1673	2.1935053433929e-14	5.95554358866012e-12	0.0000989528138764818	0.0258924769862263	0.974008570193921	37.6174350067803	rs35911561	rs13326165_STAB1	0.999999996591605	3.22836e-8	5e-8	5e-8	2.55435e-19	rs13326165	STAB1
31768069	Monocyte percentage	EUR	Skin_Sun_Exposed_Lower_leg_eQTL	EUR	eQTL	GTEx v8	Skin_Sun_Exposed_Lower_leg_eQTL	ENSG00000163938.16	GNL3	3	1673	6.35183983812866e-19	1.72457564956964e-16	0.0000989526585066845	0.0258924347596879	0.974008612581806	37.6174979920485	rs35911561	rs13326165_STAB1	0.999999961520218	3.22836e-8	5e-8	5e-8	7.77772e-24	rs13326165	STAB1
31768069	Neuroticism score	EUR	Testis_eQTL	EUR	eQTL	GTEx v8	Testis_eQTL	ENSG00000163938.16	GNL3	3	1680	6.19941190447242e-17	5.13196691777409e-15	0.0023330992826679	0.192332151822955	0.805334748894371	4.18720812542926	rs11717836	rs2015971_STAB1	0.0541142694605797	2.7517e-7	5e-8	5e-8	3.19712e-19	rs2015971	STAB1
31768069	Neuroticism score	EUR	Muscle_Skeletal_eQTL	EUR	eQTL	GTEx v8	Muscle_Skeletal_eQTL	ENSG00000163938.16	GNL3	3	1680	1.85290489426395e-13	1.53386268982776e-11	0.00245418954272227	0.202366341935023	0.79517946850673	3.92940575445125	rs7620039	rs2015971_STAB1	0.26445982261772	2.07406e-7	5e-8	5e-8	3.89084e-16	rs2015971	STAB1
31768069	Neuroticism score	EUR	Nerve_Tibial_eQTL	EUR	eQTL	GTEx v8	Nerve_Tibial_eQTL	ENSG00000163938.16	GNL3	3	1680	3.82061346079003e-14	3.16276159553644e-12	0.00430371946502793	0.355628337160826	0.640067943370944	1.79982267015321	rs34017441	rs2015971_STAB1	0.0296750990455601	1.42743E-06	5e-8	5e-8	1.18701e-16	rs2015971	STAB1
31768069	Neuroticism score	EUR	Heart_Left_Ventricle_eQTL	EUR	eQTL	GTEx v8	Heart_Left_Ventricle_eQTL	ENSG00000163938.16	GNL3	3	1680	2.08786370434958e-10	1.7283651457025e-8	0.00345155731744181	0.285013599119839	0.711534826070283	2.49649430156175	rs1961958	rs2015971_STAB1	0.018809167064962	5.10333e-7	5e-8	5e-8	1.89996e-12	rs2015971	STAB1
31768069	Neuroticism score	EUR	Cells_Cultured_fibroblasts_eQTL	EUR	eQTL	GTEx v8	Cells_Cultured_fibroblasts_eQTL	ENSG00000163938.16	GNL3	3	1680	3.67620195292377e-22	3.04321556563305e-20	0.00230125545675713	0.189693401167534	0.808005343375711	4.25953321729993	rs13078422	rs2015971_STAB1	0.107584523266153	5.53688e-7	5e-8	5e-8	1.26869e-24	rs2015971	STAB1
31768069	Neuroticism score	EUR	Stomach_eQTL	EUR	eQTL	GTEx v8	Stomach_eQTL	ENSG00000163938.16	GNL3	3	1680	6.39657403928027e-7	0.0000529518071431851	0.00197234290282468	0.162437991863623	0.835536073769005	5.14372323976086	rs2015971	rs2015971_STAB1	0.0898970634856258	3.00575e-8	5e-8	5e-8	3.53158e-8	rs2015971	STAB1
31768069	Impedance of leg (right)	EUR	Brain_Cerebellar_Hemisphere_eQTL	EUR	eQTL	GTEx v8	Brain_Cerebellar_Hemisphere_eQTL	ENSG00000163938.16	GNL3	3	1836	7.84204597382599e-24	1.08280121635303e-10	5.96030942519868e-15	0.0813791662104919	0.918620833681225	11.2881573559645	rs13081155	rs772585020_GNL3	0.165351509455376	7.35315e-19	5e-8	5e-8	3.84267e-15	rs772585020	GNL3
31768069	Impedance of leg (right)	EUR	Brain_Hypothalamus_eQTL	EUR	eQTL	GTEx v8	Brain_Hypothalamus_eQTL	ENSG00000163938.16	GNL3	3	1836	1.02687886198073e-18	0.000014178770240714	7.83608938907073e-15	0.107305194650568	0.892680626579187	8.31908119160627	rs13083798	rs772585020_GNL3	0.386875802547846	8.84382e-19	5e-8	5e-8	8.56547e-11	rs772585020	GNL3
31768069	Impedance of leg (right)	EUR	Esophagus_Gastroesophageal_Junction_eQTL	EUR	eQTL	GTEx v8	Esophagus_Gastroesophageal_Junction_eQTL	ENSG00000163938.16	GNL3	3	1836	1.01002091979476e-18	0.0000139460018998358	2.14773538866764e-14	0.295847360623988	0.704138693374088	2.38007427846897	rs3216517	rs772585020_GNL3	0.548192000594256	1.15475e-19	5e-8	5e-8	1.03328e-9	rs772585020	GNL3
31768069	Impedance of leg (right)	EUR	Esophagus_Muscularis_eQTL	EUR	eQTL	GTEx v8	Esophagus_Muscularis_eQTL	ENSG00000163938.16	GNL3	3	1836	1.17124625479039e-24	1.61721427490843e-11	4.20070059939388e-15	0.0570588064848495	0.942941193498975	16.5257784308781	rs2577831	rs772585020_GNL3	0.562693520036463	5.25335e-20	5e-8	5e-8	1.64549e-15	rs772585020	GNL3
31768069	Impedance of leg (right)	EUR	Heart_Atrial_Appendage_eQTL	EUR	eQTL	GTEx v8	Heart_Atrial_Appendage_eQTL	ENSG00000163938.16	GNL3	3	1836	2.65528126686113e-17	0.000366631590163186	2.58097557316371e-14	0.355727824400803	0.643905544009005	1.8101073344308	rs13083798	rs772585020_GNL3	0.138651295262353	8.84382e-19	5e-8	5e-8	3.35323e-8	rs772585020	GNL3
30664745	Osteoarthritis of the hip or knee	EUR	Colon_Transverse_eQTL	EUR	eQTL	GTEx v8	Colon_Transverse_eQTL	ENSG00000163938.16	GNL3	3	2227	1.12439830438938e-11	0.00000460638913528474	9.75663827143816e-7	0.399105089905573	0.600889328030222	1.50559174319824	rs3774354	rs3774354_ITIH1	0.0509497668963574	1.367e-11	5e-8	5e-8	6.74358e-9	rs3774354	ITIH1
30664745	Osteoarthritis of the hip or knee	EUR	Pancreas_eQTL	EUR	eQTL	GTEx v8	Pancreas_eQTL	ENSG00000163938.16	GNL3	3	2227	7.39736875759541e-10	0.000303052387589531	4.94028922000573e-7	0.201593651965749	0.798102800878004	3.95896791935492	rs731831	rs3774354_ITIH1	0.183390055495538	1.394e-11	5e-8	5e-8	1.0366e-7	rs3774354	ITIH1
30664745	Osteoarthritis of the hip or knee	EUR	Esophagus_Gastroesophageal_Junction_eQTL	EUR	eQTL	GTEx v8	Esophagus_Gastroesophageal_Junction_eQTL	ENSG00000163938.16	GNL3	3	2227	3.52648266274938e-11	0.0000144471504092853	7.13830426343134e-7	0.29173088505103	0.708253953932869	2.42776473190002	rs3774355	rs3774354_ITIH1	0.128182600815314	1.579e-11	5e-8	5e-8	4.17623e-9	rs3774354	ITIH1
30664745	Osteoarthritis of the hip or knee	EUR	Cells_Cultured_fibroblasts_eQTL	EUR	eQTL	GTEx v8	Cells_Cultured_fibroblasts_eQTL	ENSG00000163938.16	GNL3	3	2227	5.64497932796622e-26	2.3126121182984e-20	4.12821505839768e-7	0.168291323306766	0.831708263871727	4.9420745379467	rs6976	rs3774354_ITIH1	0.106116207688349	2.042e-10	5e-8	5e-8	1.26869e-24	rs3774354	ITIH1
31768069	Platelet crit	EUR	Pituitary_eQTL	EUR	eQTL	GTEx v8	Pituitary_eQTL	ENSG00000163938.16	GNL3	3	1573	5.13643776489704e-8	0.000190346626111975	0.0000295522070769896	0.108623709189547	0.891156340612885	8.20406840515661	rs3066857	rs3066857_DNAH1	0.284548790655589	1.67892e-10	5e-8	5e-8	7.97688e-8	rs3066857	DNAH1
34822786	Hip osteoarthritis	EUR	Pancreas_eQTL	EUR	eQTL	GTEx v8	Pancreas_eQTL	ENSG00000163938.16	GNL3	3	2241	2.18827183349783e-11	0.000354518698911767	1.49756581174349e-8	0.241860648132824	0.757784818170723	3.13314639657529	rs2019065	rs2268023_ITIH1	0.345957518121707	5.167e-12	5e-8	5e-8	3.04086e-9	rs2268023	ITIH1
34822786	Hip osteoarthritis	EUR	Nerve_Tibial_eQTL	EUR	eQTL	GTEx v8	Nerve_Tibial_eQTL	ENSG00000163938.16	GNL3	3	2241	2.14504188785405e-19	3.47515079046513e-12	2.46215994209208e-8	0.398289197481847	0.601710777893076	1.51073838230448	rs3774355	rs2268023_ITIH1	0.109993929224784	2.263e-13	5e-8	5e-8	1.7145e-15	rs2268023	ITIH1
34822786	Hip osteoarthritis	EUR	Esophagus_Gastroesophageal_Junction_eQTL	EUR	eQTL	GTEx v8	Esophagus_Gastroesophageal_Junction_eQTL	ENSG00000163938.16	GNL3	3	2241	5.31228494910147e-13	0.00000860635465655863	1.14231190402542e-8	0.184248527391334	0.815742854830357	4.42740501853652	rs2268023	rs2268023_ITIH1	0.164626878362621	1.556e-13	5e-8	5e-8	4.60154e-9	rs2268023	ITIH1
34822786	Hip osteoarthritis	EUR	Heart_Left_Ventricle_eQTL	EUR	eQTL	GTEx v8	Heart_Left_Ventricle_eQTL	ENSG00000163938.16	GNL3	3	2241	1.33285887101644e-15	2.15934503909622e-8	2.31855791091798e-8	0.375001155752065	0.624998799468904	1.66665832860026	rs2268023	rs2268023_ITIH1	0.0899427616285235	1.556e-13	5e-8	5e-8	2.50982e-11	rs2268023	ITIH1
34822786	Hip osteoarthritis	EUR	Cells_Cultured_fibroblasts_eQTL	EUR	eQTL	GTEx v8	Cells_Cultured_fibroblasts_eQTL	ENSG00000163938.16	GNL3	3	2241	2.97885756086369e-27	4.8260032896956e-20	2.19641927713819e-8	0.355193848134132	0.644806129901673	1.81536401401348	rs11719514	rs2268023_ITIH1	0.0930700204228943	1.581e-11	5e-8	5e-8	1.26869e-24	rs2268023	ITIH1
34822786	Hip osteoarthritis	EUR	Heart_Atrial_Appendage_eQTL	EUR	eQTL	GTEx v8	Heart_Atrial_Appendage_eQTL	ENSG00000163938.16	GNL3	3	2241	1.49945770862317e-11	0.000242924936379863	1.44714915595741e-8	0.233684432124979	0.766072628452156	3.27823561666464	rs6792369	rs2268023_ITIH1	0.498861036935778	3.04e-13	5e-8	5e-8	4.34482e-8	rs2268023	ITIH1
34822786	Total hip replacement	EUR	Testis_eQTL	EUR	eQTL	GTEx v8	Testis_eQTL	ENSG00000163938.16	GNL3	3	2171	4.92661447002983e-25	6.7806283250733e-15	2.56282185238395e-11	0.352079953224125	0.647920046750239	1.84026395373266	rs3774354	rs3774355_ITIH1	0.0593811846115002	1.401e-16	5e-8	5e-8	1.00956e-17	rs3774355	ITIH1
34822786	Total hip replacement	EUR	Pancreas_eQTL	EUR	eQTL	GTEx v8	Pancreas_eQTL	ENSG00000163938.16	GNL3	3	2171	3.55548937482922e-14	0.000489351300190497	2.43037467192716e-11	0.33383314397321	0.665677504702262	1.99404258300872	rs3774354	rs3774355_ITIH1	0.255874297906932	1.401e-16	5e-8	5e-8	5.08231e-7	rs3774355	ITIH1
34822786	Total hip replacement	EUR	Esophagus_Gastroesophageal_Junction_eQTL	EUR	eQTL	GTEx v8	Esophagus_Gastroesophageal_Junction_eQTL	ENSG00000163938.16	GNL3	3	2171	5.96560747129672e-16	0.00000821062156217361	1.28208397860291e-11	0.175632211020429	0.824359578345187	4.69366964952289	rs2286798	rs3774355_ITIH1	0.23976789000122	7.52e-16	5e-8	5e-8	6.74964e-10	rs3774355	ITIH1
34822786	Total hip replacement	EUR	Cells_Cultured_fibroblasts_eQTL	EUR	eQTL	GTEx v8	Cells_Cultured_fibroblasts_eQTL	ENSG00000163938.16	GNL3	3	2171	3.34354360735892e-30	4.60180649979669e-20	2.45748008971306e-11	0.337566977985914	0.662433021989509	1.9623750698066	rs13078422	rs3774355_ITIH1	0.126658281239016	1.291e-14	5e-8	5e-8	1.26869e-24	rs3774355	ITIH1
34822786	Total hip replacement	EUR	Stomach_eQTL	EUR	eQTL	GTEx v8	Stomach_eQTL	ENSG00000163938.16	GNL3	3	2171	5.11324531636307e-15	0.0000703749323924059	1.61277975820899e-11	0.221192358241918	0.778737266809554	3.52063368282304	rs3774354	rs3774355_ITIH1	0.285856603942128	1.401e-16	5e-8	5e-8	4.23568e-8	rs3774355	ITIH1
34822786	Total hip replacement	EUR	Heart_Atrial_Appendage_eQTL	EUR	eQTL	GTEx v8	Heart_Atrial_Appendage_eQTL	ENSG00000163938.16	GNL3	3	2171	2.16973929382227e-14	0.000298626892833096	2.09314626678418e-11	0.287372865725268	0.712328507360945	2.47876049662232	rs3774354	rs3774355_ITIH1	0.278281752061279	1.401e-16	5e-8	5e-8	2.81193e-7	rs3774355	ITIH1
34737426	Nervous feelings	EUR	Brain_Cerebellar_Hemisphere_eQTL	EUR	eQTL	GTEx v8	Brain_Cerebellar_Hemisphere_eQTL	ENSG00000163938.16	GNL3	3	1981	1.57168437994431e-17	2.85169743980276e-11	1.1129167968601e-8	0.0192122103884676	0.980787778453845	51.0502310053078	rs13081155	rs2710323_ITIH1	0.276239071770568	2.02619e-12	5e-8	5e-8	3.84267e-15	rs2710323	ITIH1
34737426	Nervous feelings	EUR	Brain_Hypothalamus_eQTL	EUR	eQTL	GTEx v8	Brain_Hypothalamus_eQTL	ENSG00000163938.16	GNL3	3	1981	2.21539259629966e-12	0.00000401965526644071	1.63206833477241e-8	0.0286412389434964	0.971354725078338	33.9145498207893	rs13083798	rs2710323_ITIH1	0.186279679942674	8.64535e-12	5e-8	5e-8	8.56547e-11	rs2710323	ITIH1
34737426	Nervous feelings	EUR	Esophagus_Gastroesophageal_Junction_eQTL	EUR	eQTL	GTEx v8	Esophagus_Gastroesophageal_Junction_eQTL	ENSG00000163938.16	GNL3	3	1981	4.08286094450417e-12	0.00000740802940532235	8.25462785857356e-8	0.148922646993197	0.851069862427035	5.71484512000321	rs9879090	rs2710323_ITIH1	0.280074075569717	4.10375e-12	5e-8	5e-8	4.47958e-10	rs2710323	ITIH1
34737426	Nervous feelings	EUR	Esophagus_Muscularis_eQTL	EUR	eQTL	GTEx v8	Esophagus_Muscularis_eQTL	ENSG00000163938.16	GNL3	3	1981	4.99460652732096e-18	9.06231990884075e-12	1.34704068104669e-8	0.023464455997223	0.97653553052331	41.6176505706709	rs13081155	rs2710323_ITIH1	0.192827526295926	2.02619e-12	5e-8	5e-8	1.38344e-15	rs2710323	ITIH1
34737426	Nervous feelings	EUR	Heart_Atrial_Appendage_eQTL	EUR	eQTL	GTEx v8	Heart_Atrial_Appendage_eQTL	ENSG00000163938.16	GNL3	3	1981	6.57334523324012e-11	0.000119268168671593	5.94309996083344e-8	0.106939924164575	0.89294074817002	8.34992875809255	rs7646741	rs2710323_ITIH1	0.205172794770589	1.87087e-12	5e-8	5e-8	4.25618e-8	rs2710323	ITIH1
34127677	Cataracts	EUR	Colon_Transverse_eQTL	EUR	eQTL	GTEx v8	Colon_Transverse_eQTL	ENSG00000163938.16	GNL3	3	1342	6.49901309079657e-9	0.00000606164837103461	0.000370625834311237	0.345029197172872	0.654594108845435	1.8972136683188	rs7628578	rs35173917_NEK4	0.0248383861685738	1.145e-7	5e-8	5e-8	8.0524e-10	rs35173917	NEK4
34127677	Cataracts	EUR	Nerve_Tibial_eQTL	EUR	eQTL	GTEx v8	Nerve_Tibial_eQTL	ENSG00000163938.16	GNL3	3	1342	5.06768753699402e-15	4.72664687305117e-12	0.000385218090897199	0.3586530696364	0.640961712267971	1.78713572120761	rs34017441	rs35173917_NEK4	0.0424580426613639	2.679e-7	5e-8	5e-8	1.18701e-16	rs35173917	NEK4
34127677	Cataracts	EUR	Cells_Cultured_fibroblasts_eQTL	EUR	eQTL	GTEx v8	Cells_Cultured_fibroblasts_eQTL	ENSG00000163938.16	GNL3	3	1342	8.41788809594014e-23	7.85138865723582e-20	0.000391513911025166	0.364531083651137	0.635077402437836	1.7421762667724	rs11719514	rs35173917_NEK4	0.13555293050178	2.891e-7	5e-8	5e-8	1.26869e-24	rs35173917	NEK4
31043756	bipolar disorder	EUR	Artery_Tibial_eQTL	EUR	eQTL	GTEx v8	Artery_Tibial_eQTL	ENSG00000163938.16	GNL3	3	2083	5.23639489204105e-15	8.72939436483246e-12	0.000238324479956564	0.396698594878082	0.603063080633227	1.52020473079459	rs12629699	rs2302417_ITIH1	0.0929594333278593	3.03899510115528e-8	5e-8	5e-8	9.02594e-16	rs2302417	ITIH1
31043756	bipolar disorder	EUR	Brain_Cerebellar_Hemisphere_eQTL	EUR	eQTL	GTEx v8	Brain_Cerebellar_Hemisphere_eQTL	ENSG00000163938.16	GNL3	3	2083	5.2679156655359e-14	8.78194144506495e-11	0.0000375254110799896	0.0616188390777393	0.938343635423309	15.2281939982589	rs35212380	rs2302417_ITIH1	0.334681307389451	1.85600866737753e-8	5e-8	5e-8	3.84267e-15	rs2302417	ITIH1
31043756	bipolar disorder	EUR	Brain_Hypothalamus_eQTL	EUR	eQTL	GTEx v8	Brain_Hypothalamus_eQTL	ENSG00000163938.16	GNL3	3	2083	6.21356312226174e-9	0.0000103583942814253	0.0000456190300106884	0.0751249272945945	0.924819089067549	12.310415761748	rs7646741	rs2302417_ITIH1	0.23865251917638	9.51699848112944e-9	5e-8	5e-8	4.28093e-10	rs2302417	ITIH1
31043756	bipolar disorder	EUR	Esophagus_Muscularis_eQTL	EUR	eQTL	GTEx v8	Esophagus_Muscularis_eQTL	ENSG00000163938.16	GNL3	3	2083	1.53507519526525e-14	2.55906535611171e-11	0.0000414458520162032	0.0681610028381271	0.931797551284252	13.6705375872644	rs7646741	rs2302417_ITIH1	0.173707103300665	9.51699848112944e-9	5e-8	5e-8	2.82222e-15	rs2302417	ITIH1
31043756	bipolar disorder	EUR	Heart_Atrial_Appendage_eQTL	EUR	eQTL	GTEx v8	Heart_Atrial_Appendage_eQTL	ENSG00000163938.16	GNL3	3	2083	1.30444678847225e-7	0.000217459352842562	0.000117481559688475	0.195044410400923	0.804620518241867	4.12531954434341	rs7646741	rs2302417_ITIH1	0.241493244026481	9.51699848112944e-9	5e-8	5e-8	4.25618e-8	rs2302417	ITIH1
31768069	Red blood cell (erythrocyte) count	EUR	Brain_Cerebellar_Hemisphere_eQTL	EUR	eQTL	GTEx v8	Brain_Cerebellar_Hemisphere_eQTL	ENSG00000163938.16	GNL3	3	1820	1.94231397910795e-24	1.11177195096979e-10	1.462372208427e-15	0.0827883282510889	0.917211671637735	11.0789973781802	rs13083798	rs2878632_PBRM1	0.568791815527442	2.23002e-20	5e-8	5e-8	7.96883e-15	rs2878632	PBRM1
31768069	Red blood cell (erythrocyte) count	EUR	Brain_Hypothalamus_eQTL	EUR	eQTL	GTEx v8	Brain_Hypothalamus_eQTL	ENSG00000163938.16	GNL3	3	1820	5.20393078720189e-20	0.000002978707019684	3.97031885006788e-16	0.0217476805624223	0.978249340730557	44.9817780761811	rs13083798	rs2878632_PBRM1	0.683220744097782	2.23002e-20	5e-8	5e-8	8.56547e-11	rs2878632	PBRM1
31768069	Red blood cell (erythrocyte) count	EUR	Esophagus_Gastroesophageal_Junction_eQTL	EUR	eQTL	GTEx v8	Esophagus_Gastroesophageal_Junction_eQTL	ENSG00000163938.16	GNL3	3	1820	4.4126936228607e-20	0.00000252580635823512	9.33787339372814e-16	0.0525020798675584	0.947495394326082	18.0468163683464	rs9879090	rs2878632_PBRM1	0.274708533275669	1.65983e-20	5e-8	5e-8	4.47958e-10	rs2878632	PBRM1
31768069	Red blood cell (erythrocyte) count	EUR	Esophagus_Muscularis_eQTL	EUR	eQTL	GTEx v8	Esophagus_Muscularis_eQTL	ENSG00000163938.16	GNL3	3	1820	5.19237028273039e-25	2.9720898379365e-11	1.85709140700909e-15	0.105404497172629	0.894595502797646	8.48726123452304	rs13083798	rs2878632_PBRM1	0.309152024125756	2.23002e-20	5e-8	5e-8	3.73176e-15	rs2878632	PBRM1
31768069	Red blood cell (erythrocyte) count	EUR	Heart_Atrial_Appendage_eQTL	EUR	eQTL	GTEx v8	Heart_Atrial_Appendage_eQTL	ENSG00000163938.16	GNL3	3	1820	3.7156515029638e-18	0.000212682252458027	3.62513345998046e-15	0.206707960262245	0.793079357485293	3.83671415691556	rs13083798	rs2878632_PBRM1	0.604150998933088	2.23002e-20	5e-8	5e-8	3.35323e-8	rs2878632	PBRM1
32888493	hematocrit	EUR	Testis_eQTL	EUR	eQTL	GTEx v8	Testis_eQTL	ENSG00000163938.16	GNL3	3	2191	1.01302753048086e-32	5.28821347723475e-15	3.98014377461484e-19	0.206978725464266	0.79302127453573	3.83141442559826	rs7614981	rs66782572_NT5DC2	0.451169233968594	1.36e-24	5e-8	5e-8	8.24403e-19	rs66782572	NT5DC2
32888493	hematocrit	EUR	Brain_Cerebellar_Hemisphere_eQTL	EUR	eQTL	GTEx v8	Brain_Cerebellar_Hemisphere_eQTL	ENSG00000163938.16	GNL3	3	2187	6.0941160868058e-28	3.18125479159269e-10	4.43630758911496e-19	0.230815257921005	0.769184741760873	3.33246921667597	rs2577831	rs66782572_NT5DC2	0.392884217568693	1.01e-24	5e-8	5e-8	4.42991e-14	rs66782572	NT5DC2
32888493	hematocrit	EUR	Brain_Hypothalamus_eQTL	EUR	eQTL	GTEx v8	Brain_Hypothalamus_eQTL	ENSG00000163938.16	GNL3	3	2181	3.69773288764091e-23	0.0000193029314023097	2.90518115344051e-19	0.15080729887859	0.849173398190008	5.63085079107246	rs13083798	rs66782572_NT5DC2	0.846527986474788	1.36e-23	5e-8	5e-8	8.56547e-11	rs66782572	NT5DC2
32888493	hematocrit	EUR	Pituitary_eQTL	EUR	eQTL	GTEx v8	Pituitary_eQTL	ENSG00000163938.16	GNL3	3	2191	3.06443901819965e-22	0.000159970062299443	1.71552814993324e-19	0.0886429246740948	0.911197105263603	10.2794115674062	rs66782572	rs66782572_NT5DC2	0.709901019608644	4.22e-25	5e-8	5e-8	4.42564e-8	rs66782572	NT5DC2
32888493	hematocrit	EUR	Esophagus_Muscularis_eQTL	EUR	eQTL	GTEx v8	Esophagus_Muscularis_eQTL	ENSG00000163938.16	GNL3	3	2191	4.21892777689226e-29	2.20236766108927e-11	1.4755589258289e-19	0.0761033347103543	0.923896665267621	12.1400286700173	rs2577831	rs66782572_NT5DC2	0.906975600714536	1.01e-24	5e-8	5e-8	1.64549e-15	rs66782572	NT5DC2
31768069	Duration to complete alphanumeric path (trail #2)	EUR	Pituitary_eQTL	EUR	eQTL	GTEx v8	Pituitary_eQTL	ENSG00000163938.16	GNL3	3	1678	4.23173007486875e-7	0.0000999739230936719	0.000246279434238307	0.0572406963672897	0.942412627102371	16.4640314830431	rs13081028	rs7639267_NT5DC2	0.17609610134566	3.25569e-8	5e-8	5e-8	1.00077e-8	rs7639267	NT5DC2
31768069	Haematocrit percentage	EUR	Testis_eQTL	EUR	eQTL	GTEx v8	Testis_eQTL	ENSG00000163938.16	GNL3	3	1680	6.91450218085709e-27	5.53637490604594e-15	2.59452205594051e-13	0.206947815168707	0.793052184831025	3.83213605896016	rs12489828	rs1010554_STAB1	0.494844563689758	9.68867e-19	5e-8	5e-8	8.24403e-19	rs1010554	STAB1
31768069	Haematocrit percentage	EUR	Brain_Cerebellar_Hemisphere_eQTL	EUR	eQTL	GTEx v8	Brain_Cerebellar_Hemisphere_eQTL	ENSG00000163938.16	GNL3	3	1680	3.62242657988177e-22	2.90044186714904e-10	2.61296693857869e-13	0.208426	0.791573842315697	3.79786228471956	rs13083798	rs1010554_STAB1	0.802839023152161	3.48537e-18	5e-8	5e-8	7.96883e-15	rs1010554	STAB1
31768069	Haematocrit percentage	EUR	Brain_Hypothalamus_eQTL	EUR	eQTL	GTEx v8	Brain_Hypothalamus_eQTL	ENSG00000163938.16	GNL3	3	1680	9.81177939144583e-18	0.0000078561966987081	7.88966906886486e-14	0.0622340577690531	0.937758086034171	15.0682459034591	rs13083798	rs1010554_STAB1	0.969104506282341	3.48537e-18	5e-8	5e-8	8.56547e-11	rs1010554	STAB1
31768069	Haematocrit percentage	EUR	Pituitary_eQTL	EUR	eQTL	GTEx v8	Pituitary_eQTL	ENSG00000163938.16	GNL3	3	1680	1.37698759605738e-16	0.000110254062741558	8.03256310014721e-14	0.0633794442177613	0.936510301719419	14.776246672371	rs1010554	rs1010554_STAB1	0.504177714617494	4.78985e-19	5e-8	5e-8	2.19209e-8	rs1010554	STAB1
31768069	Haematocrit percentage	EUR	Esophagus_Muscularis_eQTL	EUR	eQTL	GTEx v8	Esophagus_Muscularis_eQTL	ENSG00000163938.16	GNL3	3	1680	9.25803762882492e-23	7.41282103422548e-11	3.26466366063775e-13	0.260659115500102	0.73934088442544	2.8364282714876	rs13083798	rs1010554_STAB1	0.4479517598698	3.48537e-18	5e-8	5e-8	3.73176e-15	rs1010554	STAB1
32242144	meta-analysis between the UKB 25OHD GWAS and the SUNLIGHT consortium GWAS	EUR	Testis_eQTL	EUR	eQTL	GTEx v8	Testis_eQTL	ENSG00000163938.16	GNL3	3	1683	9.66256425190756e-20	6.51140271949066e-15	0.00000475044389680957	0.319442061286112	0.680553188269986	2.13044326576781	rs2590838	rs4481150_ITIH3	0.247175987171125	4.73583966926259e-11	5e-8	5e-8	8.50042e-19	rs4481150	ITIH3
32242144	meta-analysis between the UKB 25OHD GWAS and the SUNLIGHT consortium GWAS	EUR	Brain_Cerebellar_Hemisphere_eQTL	EUR	eQTL	GTEx v8	Brain_Cerebellar_Hemisphere_eQTL	ENSG00000163938.16	GNL3	3	1683	3.42830941655076e-16	2.31026699292344e-11	2.40804005641899e-7	0.0152425279523305	0.984757231220559	64.6058996447499	rs35212380	rs4481150_ITIH3	0.240043679520846	3.09467200901127e-11	5e-8	5e-8	3.84267e-15	rs4481150	ITIH3
32242144	meta-analysis between the UKB 25OHD GWAS and the SUNLIGHT consortium GWAS	EUR	Brain_Hypothalamus_eQTL	EUR	eQTL	GTEx v8	Brain_Hypothalamus_eQTL	ENSG00000163938.16	GNL3	3	1683	6.07791637439886e-11	0.00000409578246284722	4.48739017640022e-7	0.0292688701058662	0.970726585311873	33.1658373487166	rs35212380	rs4481150_ITIH3	0.155933453304673	3.09467200901127e-11	5e-8	5e-8	4.28093e-10	rs4481150	ITIH3
32242144	meta-analysis between the UKB 25OHD GWAS and the SUNLIGHT consortium GWAS	EUR	Pituitary_eQTL	EUR	eQTL	GTEx v8	Pituitary_eQTL	ENSG00000163938.16	GNL3	3	1683	5.64016014466256e-9	0.000380078757013888	0.00000271818678764203	0.182355738789643	0.817261458626397	4.48168762908609	rs13303	rs4481150_ITIH3	0.0866950451957126	1.8412279066975e-10	5e-8	5e-8	2.66968e-8	rs4481150	ITIH3
32242144	meta-analysis between the UKB 25OHD GWAS and the SUNLIGHT consortium GWAS	EUR	Esophagus_Gastroesophageal_Junction_eQTL	EUR	eQTL	GTEx v8	Esophagus_Gastroesophageal_Junction_eQTL	ENSG00000163938.16	GNL3	3	1683	2.79494579701462e-10	0.0000188345631543067	0.00000560479309776054	0.377072541663445	0.622903018700807	1.6519447848228	rs4481150	rs4481150_ITIH3	0.11216168041605	1.68512949015617e-11	5e-8	5e-8	2.24324e-8	rs4481150	ITIH3
32242144	meta-analysis between the UKB 25OHD GWAS and the SUNLIGHT consortium GWAS	EUR	Esophagus_Muscularis_eQTL	EUR	eQTL	GTEx v8	Esophagus_Muscularis_eQTL	ENSG00000163938.16	GNL3	3	1683	1.24425328173416e-16	8.38476618752576e-12	3.36104217353308e-7	0.0216710412325009	0.978328622654899	45.1445139233856	rs13081155	rs4481150_ITIH3	0.171139158109753	3.51774839924541e-11	5e-8	5e-8	1.38344e-15	rs4481150	ITIH3
32242144	meta-analysis between the UKB 25OHD GWAS and the SUNLIGHT consortium GWAS	EUR	Heart_Atrial_Appendage_eQTL	EUR	eQTL	GTEx v8	Heart_Atrial_Appendage_eQTL	ENSG00000163938.16	GNL3	3	1683	1.58929148291403e-9	0.000107099074470493	0.0000014278590408148	0.0953158996459692	0.904575571831228	9.49029044672592	rs35212380	rs4481150_ITIH3	0.182883585316903	3.09467200901127e-11	5e-8	5e-8	4.25618e-8	rs4481150	ITIH3
31768069	Platelet distribution width	EUR	Testis_eQTL	EUR	eQTL	GTEx v8	Testis_eQTL	ENSG00000163938.16	GNL3	3	774	2.79408792287053e-13	1.1592508646167e-9	0.00000410540771229719	0.0160491516124906	0.983946741820266	61.3083336476484	rs1060330	rs62259688_IQCF6	0.389273860143896	7.1613e-10	5e-8	5e-8	6.37093e-14	rs62259688	IQCF6
31768069	Platelet distribution width	EUR	Brain_Cerebellar_Hemisphere_eQTL	EUR	eQTL	GTEx v8	Brain_Cerebellar_Hemisphere_eQTL	ENSG00000163938.16	GNL3	3	774	9.54145517026707e-9	0.0000395869437940594	0.00000673855771826927	0.0269849161739928	0.972968748783042	36.056022650193	rs7614727	rs62259688_IQCF6	0.289431243976928	6.24061e-10	5e-8	5e-8	1.44819e-9	rs62259688	IQCF6
31768069	Platelet distribution width	EUR	Pituitary_eQTL	EUR	eQTL	GTEx v8	Pituitary_eQTL	ENSG00000163938.16	GNL3	3	1593	4.6504757736301e-8	0.000143156526378522	0.0000266837720545967	0.0812225819718548	0.918607531224954	11.3097553528065	rs9311474	rs9311474_GLYCTK-AS1	0.132503637828802	5.3339e-10	5e-8	5e-8	4.89142e-8	rs9311474	GLYCTK-AS1
31768069	Platelet distribution width	EUR	Pituitary_eQTL	EUR	eQTL	GTEx v8	Pituitary_eQTL	ENSG00000163938.16	GNL3	3	774	1.21251075476837e-7	0.000503063675740818	0.00000506832005235818	0.0200487227497285	0.979443024003404	48.8531382387772	rs1060330	rs62259688_IQCF6	0.328534067728641	7.1613e-10	5e-8	5e-8	4.19303e-8	rs62259688	IQCF6
31768069	Platelet distribution width	EUR	Esophagus_Gastroesophageal_Junction_eQTL	EUR	eQTL	GTEx v8	Esophagus_Gastroesophageal_Junction_eQTL	ENSG00000163938.16	GNL3	3	1593	6.02502819731433e-9	0.0000185469648707985	0.000120409139209887	0.370028029812287	0.629833008058602	1.70212242672025	rs6445358	rs9311474_GLYCTK-AS1	0.189050897638694	5.49066e-10	5e-8	5e-8	8.35216e-9	rs9311474	GLYCTK-AS1
31768069	Platelet distribution width	EUR	Esophagus_Gastroesophageal_Junction_eQTL	EUR	eQTL	GTEx v8	Esophagus_Gastroesophageal_Junction_eQTL	ENSG00000163938.16	GNL3	3	774	1.79552542442079e-8	0.0000744953078843224	0.00000664262954798558	0.0265865522192606	0.973332291888053	36.6099479112949	rs1060330	rs62259688_IQCF6	0.364594570685066	7.1613e-10	5e-8	5e-8	7.22955e-9	rs62259688	IQCF6
31768069	Platelet distribution width	EUR	Esophagus_Muscularis_eQTL	EUR	eQTL	GTEx v8	Esophagus_Muscularis_eQTL	ENSG00000163938.16	GNL3	3	774	4.33353947934158e-11	1.79796038168914e-7	0.00000423594749702551	0.0165912960575404	0.983404288155588	59.2723	rs7614727	rs62259688_IQCF6	0.404281191394819	6.24061e-10	5e-8	5e-8	1.66482e-11	rs62259688	IQCF6
32242144	25 hydroxyvitamin D with BMI as covariate	EUR	Testis_eQTL	EUR	eQTL	GTEx v8	Testis_eQTL	ENSG00000163938.16	GNL3	3	1836	7.72864679115668e-20	6.69673377909625e-15	0.00000351347016950639	0.303739629550752	0.696256856979069	2.29228190608144	rs2590838	rs772585020_GNL3	0.212925557267848	3.78316e-11	5e-8	5e-8	8.50042e-19	rs772585020	GNL3
32242144	25 hydroxyvitamin D with BMI as covariate	EUR	Brain_Cerebellar_Hemisphere_eQTL	EUR	eQTL	GTEx v8	Brain_Cerebellar_Hemisphere_eQTL	ENSG00000163938.16	GNL3	3	1836	2.42758177627578e-16	2.10345605408e-11	1.84507188428503e-7	0.0150022192429342	0.984997596228844	65.6567925237301	rs35212380	rs772585020_GNL3	0.252959045427364	1.88922e-11	5e-8	5e-8	3.84267e-15	rs772585020	GNL3
32242144	25 hydroxyvitamin D with BMI as covariate	EUR	Brain_Hypothalamus_eQTL	EUR	eQTL	GTEx v8	Brain_Hypothalamus_eQTL	ENSG00000163938.16	GNL3	3	1836	3.85450863026781e-11	0.00000333986257150061	2.94136682485239e-7	0.0245109303690993	0.975485435593102	39.7979766946296	rs7646741	rs772585020_GNL3	0.18900924717079	1.53324e-11	5e-8	5e-8	4.28093e-10	rs772585020	GNL3
32242144	25 hydroxyvitamin D with BMI as covariate	EUR	Pituitary_eQTL	EUR	eQTL	GTEx v8	Pituitary_eQTL	ENSG00000163938.16	GNL3	3	1836	4.76739098116985e-9	0.00041308587498512	0.00000269631658621635	0.232864274593652	0.766719938447387	3.29256147077654	rs11130324	rs772585020_GNL3	0.0985560121460092	1.3693e-11	5e-8	5e-8	4.4474e-7	rs772585020	GNL3
32242144	25 hydroxyvitamin D with BMI as covariate	EUR	Esophagus_Gastroesophageal_Junction_eQTL	EUR	eQTL	GTEx v8	Esophagus_Gastroesophageal_Junction_eQTL	ENSG00000163938.16	GNL3	3	1836	1.71326030087658e-10	0.0000148450931182323	0.00000364312234140628	0.314985017990561	0.684996493622652	2.17469547597079	rs3216517	rs772585020_GNL3	0.350997125026047	4.45872e-11	5e-8	5e-8	1.03328e-9	rs772585020	GNL3
32242144	25 hydroxyvitamin D with BMI as covariate	EUR	Esophagus_Muscularis_eQTL	EUR	eQTL	GTEx v8	Esophagus_Muscularis_eQTL	ENSG00000163938.16	GNL3	3	1836	6.74020196050165e-17	5.84026406776274e-12	2.41738834166708e-7	0.0199662027032442	0.980033555552085	49.0846241580451	rs34372721	rs772585020_GNL3	0.233914008331047	4.62789e-11	5e-8	5e-8	4.17703e-16	rs772585020	GNL3
32242144	25 hydroxyvitamin D with BMI as covariate	EUR	Heart_Atrial_Appendage_eQTL	EUR	eQTL	GTEx v8	Heart_Atrial_Appendage_eQTL	ENSG00000163938.16	GNL3	3	1836	1.00029556831455e-9	0.000086673816289252	9.72303183088278e-7	0.0833317457254755	0.916580607154755	10.9991768344119	rs7646741	rs772585020_GNL3	0.22336463907317	1.53324e-11	5e-8	5e-8	4.25618e-8	rs772585020	GNL3
34822786	Knee and/or hip osteoarthritis	EUR	Colon_Transverse_eQTL	EUR	eQTL	GTEx v8	Colon_Transverse_eQTL	ENSG00000163938.16	GNL3	3	1844	1.94044389193349e-9	0.00000416135037883309	0.000176254786280369	0.377362149444316	0.62245743247858	1.6494962025078	rs11130323	rs1546737_DNAH1	0.0148146904723845	5.142e-8	5e-8	5e-8	8.23593e-10	rs1546737	DNAH1
34822786	Knee and/or hip osteoarthritis	EUR	Testis_eQTL	EUR	eQTL	GTEx v8	Testis_eQTL	ENSG00000163938.16	GNL3	3	1844	4.90715295652038e-18	1.0523562623736e-14	0.000170829054765634	0.365714819890139	0.634114351055087	1.7339038960619	rs2878726	rs1546737_DNAH1	0.0310438857113132	6.625e-8	5e-8	5e-8	4.14958e-19	rs1546737	DNAH1
34822786	Knee and/or hip osteoarthritis	EUR	Pancreas_eQTL	EUR	eQTL	GTEx v8	Pancreas_eQTL	ENSG00000163938.16	GNL3	3	1844	1.36385316131499e-7	0.000292483121676645	0.0000879845426738623	0.187874210388505	0.811745185561829	4.32068448289535	rs2019065	rs1546737_DNAH1	0.391074999300439	2.062e-8	5e-8	5e-8	3.04086e-9	rs1546737	DNAH1
34822786	Knee and/or hip osteoarthritis	EUR	Nerve_Tibial_eQTL	EUR	eQTL	GTEx v8	Nerve_Tibial_eQTL	ENSG00000163938.16	GNL3	3	1844	1.4745821994513e-15	3.16229354521195e-12	0.000155266015992081	0.332305909753432	0.667538824227413	2.00880816330568	rs34017441	rs1546737_DNAH1	0.0545030175243964	4.707e-8	5e-8	5e-8	1.18701e-16	rs1546737	DNAH1
34822786	Knee and/or hip osteoarthritis	EUR	Esophagus_Gastroesophageal_Junction_eQTL	EUR	eQTL	GTEx v8	Esophagus_Gastroesophageal_Junction_eQTL	ENSG00000163938.16	GNL3	3	1844	5.6291645212399e-9	0.0000120719418945087	0.000113416313039802	0.242467877645924	0.757406628469977	3.12374008393813	rs2276824	rs1546737_DNAH1	0.0920187951962884	2.645e-8	5e-8	5e-8	4.47958e-10	rs1546737	DNAH1
34822786	Knee and/or hip osteoarthritis	EUR	Cells_Cultured_fibroblasts_eQTL	EUR	eQTL	GTEx v8	Cells_Cultured_fibroblasts_eQTL	ENSG00000163938.16	GNL3	3	1844	2.81977690176941e-23	6.04711103844953e-20	0.000163999039559109	0.351052942631636	0.648783058328806	1.84810602487836	rs6976	rs1546737_DNAH1	0.095574073802203	9.877e-8	5e-8	5e-8	1.26869e-24	rs1546737	DNAH1
34822786	Knee and/or hip osteoarthritis	EUR	Stomach_eQTL	EUR	eQTL	GTEx v8	Stomach_eQTL	ENSG00000163938.16	GNL3	3	1844	4.63701167925014e-8	0.0000994423512491979	0.000143774581278846	0.307637542260056	0.692119194437298	2.24978781637849	rs3774354	rs1546737_DNAH1	0.0194802801314645	1.818e-8	5e-8	5e-8	4.23568e-8	rs1546737	DNAH1
34822786	Total joint replacement	EUR	Pancreas_eQTL	EUR	eQTL	GTEx v8	Pancreas_eQTL	ENSG00000163938.16	GNL3	3	2239	4.00746303384306e-12	0.000438647446986173	2.74171949703705e-9	0.299401986950444	0.700159362856843	2.33852610661776	rs2019065	rs3774354_ITIH1	0.285020780030717	1.143e-12	5e-8	5e-8	3.04086e-9	rs3774354	ITIH1
34822786	Total joint replacement	EUR	Esophagus_Gastroesophageal_Junction_eQTL	EUR	eQTL	GTEx v8	Esophagus_Gastroesophageal_Junction_eQTL	ENSG00000163938.16	GNL3	3	2239	7.54011677152606e-14	0.00000825323388856258	1.62054592047227e-9	0.176557698289461	0.823434046856028	4.66382409169172	rs2286798	rs3774354_ITIH1	0.162204094103789	1.248e-13	5e-8	5e-8	6.74964e-10	rs3774354	ITIH1
34822786	Total joint replacement	EUR	Cells_Cultured_fibroblasts_eQTL	EUR	eQTL	GTEx v8	Cells_Cultured_fibroblasts_eQTL	ENSG00000163938.16	GNL3	3	2239	4.7539915897964e-28	5.20360701083786e-20	3.50330726238635e-9	0.382846592531128	0.617153403965563	1.61201226811333	rs2239551	rs3774354_ITIH1	0.145168519456454	8.146e-14	5e-8	5e-8	1.4326e-23	rs3774354	ITIH1
34822786	Total joint replacement	EUR	Heart_Atrial_Appendage_eQTL	EUR	eQTL	GTEx v8	Heart_Atrial_Appendage_eQTL	ENSG00000163938.16	GNL3	3	2239	2.99248116921703e-12	0.000327549927209798	2.88786426748285e-9	0.315414550120926	0.684257897061007	2.16939230228495	rs6792369	rs3774354_ITIH1	0.200553113880068	1.585e-13	5e-8	5e-8	4.34482e-8	rs3774354	ITIH1
32888493	platelet count	EUR	Pituitary_eQTL	EUR	eQTL	GTEx v8	Pituitary_eQTL	ENSG00000163938.16	GNL3	3	2011	3.99308354410617e-9	0.000135977789266213	0.00000223167464305532	0.0750711611176917	0.924790625425314	12.3188533606865	rs9311474	rs9311474_GLYCTK-AS1	0.228763507076306	2.32e-11	5e-8	5e-8	4.89142e-8	rs9311474	GLYCTK-AS1
31768069	Red blood cell (erythrocyte) distribution width	EUR	Brain_Cerebellar_Hemisphere_eQTL	EUR	eQTL	GTEx v8	Brain_Cerebellar_Hemisphere_eQTL	ENSG00000163938.16	GNL3	3	2022	1.20732172787034e-23	9.62044042848623e-11	9.97484489184588e-15	0.0785622647860544	0.921437735117734	11.7287572809548	rs35212380	rs2276823_AC006254.1	0.227468281688365	9.00089e-19	5e-8	5e-8	3.84267e-15	rs2276823	AC006254.1
31768069	Red blood cell (erythrocyte) distribution width	EUR	Brain_Hypothalamus_eQTL	EUR	eQTL	GTEx v8	Brain_Hypothalamus_eQTL	ENSG00000163938.16	GNL3	3	2022	1.0671930039911e-18	0.00000850383661917849	8.42101027098988e-15	0.0661682803822658	0.933823215781107	14.1128530224187	rs13083798	rs2276823_AC006254.1	0.483221436905303	7.32256e-19	5e-8	5e-8	8.56547e-11	rs2276823	AC006254.1
31768069	Red blood cell (erythrocyte) distribution width	EUR	Esophagus_Gastroesophageal_Junction_eQTL	EUR	eQTL	GTEx v8	Esophagus_Gastroesophageal_Junction_eQTL	ENSG00000163938.16	GNL3	3	2022	1.7806025448892e-18	0.0000141885798246457	3.83242619248917e-14	0.304688321725447	0.695297489694688	2.28199586304203	rs9879090	rs2276823_AC006254.1	0.302096473904926	9.11142e-19	5e-8	5e-8	4.47958e-10	rs2276823	AC006254.1
31768069	Red blood cell (erythrocyte) distribution width	EUR	Esophagus_Muscularis_eQTL	EUR	eQTL	GTEx v8	Esophagus_Muscularis_eQTL	ENSG00000163938.16	GNL3	3	2022	3.18952769681053e-24	2.54154799783973e-11	1.16971679635342e-14	0.0923001875115562	0.907699812463015	9.83421417588528	rs34372721	rs2276823_AC006254.1	0.412503590081416	9.99087e-19	5e-8	5e-8	4.17703e-16	rs2276823	AC006254.1
31768069	Red blood cell (erythrocyte) distribution width	EUR	Heart_Atrial_Appendage_eQTL	EUR	eQTL	GTEx v8	Heart_Atrial_Appendage_eQTL	ENSG00000163938.16	GNL3	3	2022	3.7682184460486e-17	0.000300267279589843	3.69785339819237e-14	0.293954555464708	0.705745177255663	2.40086490967953	rs13083798	rs2276823_AC006254.1	0.220121756808161	7.32256e-19	5e-8	5e-8	3.35323e-8	rs2276823	AC006254.1
30664745	Hip osteoarthritis	EUR	Pancreas_eQTL	EUR	eQTL	GTEx v8	Pancreas_eQTL	ENSG00000163938.16	GNL3	3	2227	2.15437917774452e-11	0.000514708169945856	1.43878946371138e-8	0.343088427391902	0.656396850028713	1.91320020619327	rs3774354	rs3774355_ITIH1	0.397410469442931	8.504e-14	5e-8	5e-8	5.08231e-7	rs3774355	ITIH1
30664745	Hip osteoarthritis	EUR	Esophagus_Gastroesophageal_Junction_eQTL	EUR	eQTL	GTEx v8	Esophagus_Gastroesophageal_Junction_eQTL	ENSG00000163938.16	GNL3	3	2227	4.26819024954417e-13	0.000010197241112512	8.6396683520637e-9	0.205618126762259	0.794371667356534	3.86333481325315	rs3774355	rs3774355_ITIH1	0.376716757703431	8.201e-14	5e-8	5e-8	4.17623e-9	rs3774355	ITIH1
30664745	Hip osteoarthritis	EUR	Stomach_eQTL	EUR	eQTL	GTEx v8	Stomach_eQTL	ENSG00000163938.16	GNL3	3	2227	3.15535566336767e-12	0.0000753853989955738	9.66346538177014e-9	0.230102469677055	0.769822135257328	3.34556224597572	rs3774354	rs3774355_ITIH1	0.450636027871198	8.504e-14	5e-8	5e-8	4.23568e-8	rs3774355	ITIH1
30664745	Hip osteoarthritis	EUR	Heart_Atrial_Appendage_eQTL	EUR	eQTL	GTEx v8	Heart_Atrial_Appendage_eQTL	ENSG00000163938.16	GNL3	3	2227	1.31742741993244e-11	0.000314749911879407	1.19053337804662e-8	0.2837173680087	0.715967870160913	2.52352499667542	rs3774354	rs3774355_ITIH1	0.424722797446127	8.504e-14	5e-8	5e-8	2.81193e-7	rs3774355	ITIH1
22763110	Osteoarthritis	EUR	Colon_Transverse_eQTL	EUR	eQTL	GTEx v8	Colon_Transverse_eQTL	ENSG00000163938.16	GNL3	3	343	1.23824040454596e-10	0.00000318402156972285	0.00000317834213364645	0.0808089666019441	0.919184670910527	11.374785615541	rs2028216	rs12488461_PBRM1	0.0616693782494966	6.9584e-10	5e-8	5e-8	1.7085e-9	rs12488461	PBRM1
22763110	Osteoarthritis	EUR	Pancreas_eQTL	EUR	eQTL	GTEx v8	Pancreas_eQTL	ENSG00000163938.16	GNL3	3	343	1.3131385959573e-8	0.000337661539569674	0.00000319950742806071	0.0813540923623377	0.918305033459279	11.2877546389344	rs2028216	rs12488461_PBRM1	0.0888054442210387	6.9584e-10	5e-8	5e-8	1.67566e-7	rs12488461	PBRM1
22763110	Osteoarthritis	EUR	Nerve_Tibial_eQTL	EUR	eQTL	GTEx v8	Nerve_Tibial_eQTL	ENSG00000163938.16	GNL3	3	343	7.65899172022169e-17	1.96943943599198e-12	0.00000266862186281269	0.0676888537897296	0.932308477586436	13.7734416434733	rs6976	rs12488461_PBRM1	0.100695885972258	8.8489e-10	5e-8	5e-8	2.71089e-16	rs12488461	PBRM1
22763110	Osteoarthritis	EUR	Esophagus_Gastroesophageal_Junction_eQTL	EUR	eQTL	GTEx v8	Esophagus_Gastroesophageal_Junction_eQTL	ENSG00000163938.16	GNL3	3	343	5.10134949951894e-10	0.0000131176520985189	0.00000248483409338249	0.0629582022396019	0.937026194764073	14.8833060893004	rs11714419	rs12488461_PBRM1	0.105479403176937	6.6674e-10	5e-8	5e-8	2.86525e-9	rs12488461	PBRM1
22763110	Osteoarthritis	EUR	Esophagus_Muscularis_eQTL	EUR	eQTL	GTEx v8	Esophagus_Muscularis_eQTL	ENSG00000163938.16	GNL3	3	343	1.4617458876365e-14	3.75874540888926e-10	0.0000123825964366461	0.317724841359425	0.68226277566825	2.14733847296643	rs3755806	rs12488461_PBRM1	0.0299239401472645	2.2509e-9	5e-8	5e-8	1.03153e-13	rs12488461	PBRM1
22763110	Osteoarthritis	EUR	Cells_Cultured_fibroblasts_eQTL	EUR	eQTL	GTEx v8	Cells_Cultured_fibroblasts_eQTL	ENSG00000163938.16	GNL3	3	343	5.11355569238519e-25	1.31490392033393e-20	7.64079755921023e-7	0.0186662767853815	0.981332959134859	52.5725065806047	rs6976	rs12488461_PBRM1	0.345047514187024	8.8489e-10	5e-8	5e-8	1.26869e-24	rs12488461	PBRM1
22763110	Osteoarthritis	EUR	Heart_Atrial_Appendage_eQTL	EUR	eQTL	GTEx v8	Heart_Atrial_Appendage_eQTL	ENSG00000163938.16	GNL3	3	343	1.64084701072975e-8	0.000421928751121196	0.00000529836621678341	0.135378430746059	0.864194325728134	6.38354515535182	rs1866268	rs12488461_PBRM1	0.0847840422323741	7.3882e-9	5e-8	5e-8	2.57761e-8	rs12488461	PBRM1
32888493	red blood cell count	EUR	Testis_eQTL	EUR	eQTL	GTEx v8	Testis_eQTL	ENSG00000163938.16	GNL3	3	2306	5.81936219659004e-28	7.07295203416396e-15	2.58729559129439e-14	0.313778095613987	0.686221904385984	2.1869656103407	rs2590838	rs13083798_PBRM1	0.270736359188399	1.55e-19	5e-8	5e-8	8.50042e-19	rs13083798	PBRM1
32888493	red blood cell count	EUR	Brain_Cerebellar_Hemisphere_eQTL	EUR	eQTL	GTEx v8	Brain_Cerebellar_Hemisphere_eQTL	ENSG00000163938.16	GNL3	3	2302	1.58119602672339e-24	1.92181261235996e-11	1.22003213891933e-15	0.0138423209690049	0.986157679011775	71.2422202331485	rs13083798	rs13083798_PBRM1	0.310241973697675	3.12e-20	5e-8	5e-8	7.96883e-15	rs13083798	PBRM1
32888493	red blood cell count	EUR	Brain_Hypothalamus_eQTL	EUR	eQTL	GTEx v8	Brain_Hypothalamus_eQTL	ENSG00000163938.16	GNL3	3	2296	8.91482674509731e-20	0.00000108352324443887	6.74489787532827e-16	0.00720507004734019	0.992793846429414	137.791005487297	rs13083798	rs13083798_PBRM1	0.806047118163565	3.12e-20	5e-8	5e-8	8.56547e-11	rs13083798	PBRM1
32888493	red blood cell count	EUR	Pituitary_eQTL	EUR	eQTL	GTEx v8	Pituitary_eQTL	ENSG00000163938.16	GNL3	3	2306	4.31800025500934e-17	0.000524817113206751	2.38403765313798e-14	0.289049575551665	0.710425607335107	2.45779847965259	rs13083798	rs13083798_PBRM1	0.425506879560156	3.12e-20	5e-8	5e-8	3.28544e-7	rs13083798	PBRM1
32888493	red blood cell count	EUR	Esophagus_Gastroesophageal_Junction_eQTL	EUR	eQTL	GTEx v8	Esophagus_Gastroesophageal_Junction_eQTL	ENSG00000163938.16	GNL3	3	2306	1.55481352302726e-18	0.0000188974686553885	3.28233684807312e-14	0.398339174988676	0.601641927542638	1.51037599442671	rs13083798	rs13083798_PBRM1	0.292860259782452	3.12e-20	5e-8	5e-8	1.70682e-8	rs13083798	PBRM1
32888493	red blood cell count	EUR	Esophagus_Muscularis_eQTL	EUR	eQTL	GTEx v8	Esophagus_Muscularis_eQTL	ENSG00000163938.16	GNL3	3	2306	5.432385602989e-25	6.60261408433019e-12	1.92711014191085e-15	0.0224448701081818	0.977555129885211	43.553610476403	rs13083798	rs13083798_PBRM1	0.206632321757042	3.12e-20	5e-8	5e-8	3.73176e-15	rs13083798	PBRM1
32888493	red blood cell count	EUR	Heart_Atrial_Appendage_eQTL	EUR	eQTL	GTEx v8	Heart_Atrial_Appendage_eQTL	ENSG00000163938.16	GNL3	3	2306	5.4672847278945e-18	0.0000664503107577223	5.28368263601028e-15	0.0632821282072272	0.936651421482008	14.8011997702542	rs13083798	rs13083798_PBRM1	0.528433192531476	3.12e-20	5e-8	5e-8	3.35323e-8	rs13083798	PBRM1
34737426	Worrier / anxious feelings	EUR	US_Blood_mQTL	EUR	mQTL	US_Blood: SMR	US_Blood_mQTL	cg08332332	GNL3	3	235	4.32469077522891e-10	0.00000181284030131379	0.0000420227842187791	0.175328074530542	0.824628089412468	4.70334309904727	rs11717836	rs6798941_STIMATE-MUSTN1	0.0401333016665344	2.03063e-9	5e-8	5e-8	1.74169e-9	rs6798941	STIMATE-MUSTN1
34737426	Worrier / anxious feelings	EUR	ROSMAP_CMC_mQTL	EUR	mQTL	ROSMAP_CMC_mQTL: Brain xQTLServe	ROSMAP_CMC_mQTL	cg18595196	GNL3	3	190	1.51161282852666e-12	3.13431818909979e-9	0.0000276278274921835	0.0563424691592736	0.943629899877403	16.7481105098513	rs11130318	rs6798941_STIMATE-MUSTN1	0.055922902837928	5.76812e-9	5e-8	5e-8	7.01932177e-14	rs6798941	STIMATE-MUSTN1
34737426	Worrier / anxious feelings	EUR	ROSMAP_CMC_mQTL	EUR	mQTL	ROSMAP_CMC_mQTL: Brain xQTLServe	ROSMAP_CMC_mQTL	cg00845626	GNL3	3	188	6.56264276643659e-34	1.3607590504396e-30	0.0000755370280643238	0.155781317419709	0.84414314555223	5.41877010372126	rs13076193	rs6798941_STIMATE-MUSTN1	0.0312437247675742	5.36244e-9	5e-8	5e-8	3.66519523e-35	rs6798941	STIMATE-MUSTN1
32888493	hematocrit	EUR	FB_Brain_mQTL	EUR	mQTL	FB_Brain: SMR	FB_Brain_mQTL	cg11041457	GNL3	3	111	9.42890433282392e-18	0.00000781056947969351	2.03906174972426e-13	0.168076718103035	0.831915471327281	4.94961753606646	rs12635140	rs66782572_NT5DC2	0.135961128578256	9.18e-18	5e-8	5e-8	9.69399e-13	rs66782572	NT5DC2
30664745	Hip osteoarthritis	EUR	FB_Brain_mQTL	EUR	mQTL	FB_Brain: SMR	FB_Brain_mQTL	cg11041457	GNL3	3	100	8.61593620864672e-11	0.0000053953619535655	0.00000168134875918512	0.104391681606181	0.895601241596947	8.57923953151378	rs12635140	rs3774355_ITIH1	0.0411511605003396	1.65e-9	5e-8	5e-8	9.69399e-13	rs3774355	ITIH1
30664745	Hip osteoarthritis	EUR	ROSMAP_CMC_mQTL	EUR	mQTL	ROSMAP_CMC_mQTL: Brain xQTLServe	ROSMAP_CMC_mQTL	cg18595196	GNL3	3	193	4.23800537491097e-15	2.95001005645452e-9	7.62373522427885e-8	0.0521197627300337	0.947880158082597	18.1865785343721	rs2268027	rs3774355_ITIH1	0.056696922542147	2.347e-11	5e-8	5e-8	9.46861967e-14	rs3774355	ITIH1
30664745	Hip osteoarthritis	EUR	ROSMAP_CMC_mQTL	EUR	mQTL	ROSMAP_CMC_mQTL: Brain xQTLServe	ROSMAP_CMC_mQTL	cg00845626	GNL3	3	191	9.66706821849632e-37	6.72909681203305e-31	1.07622948460383e-7	0.0739886602088304	0.926011232168221	12.5155831928107	rs11130319	rs3774355_ITIH1	0.0780879181754486	5.136e-11	5e-8	5e-8	5.06476626e-36	rs3774355	ITIH1
31768069	Standing height	EUR	FB_Brain_mQTL	EUR	mQTL	FB_Brain: SMR	FB_Brain_mQTL	cg11041457	GNL3	3	93	7.95022168915876e-23	0.00000487096535260295	1.59341327005786e-18	0.0967224431027669	0.903272685931878	9.33881172720335	rs35401426	rs2564924_AC096887.1	0.112833970061942	9.43713e-23	5e-8	5e-8	7.12693e-13	rs2564924	AC096887.1
31768069	Standing height	EUR	Brain-mMeta_mQTL	EUR	mQTL	Brain-mMeta (5 cohorts)	Brain-mMeta_mQTL	cg11041457	GNL3	3	307	7.76930958236289e-26	4.4386442780347e-9	4.7926782271526e-19	0.0264072105719838	0.973592784989371	36.8684447884202	rs6414569	rs2564924_AC096887.1	0.700592626945295	8.34563e-24	5e-8	5e-8	1.20227e-12	rs2564924	AC096887.1
31768069	Standing height	EUR	ROSMAP_CMC_mQTL	EUR	mQTL	ROSMAP_CMC_mQTL: Brain xQTLServe	ROSMAP_CMC_mQTL	cg18595196	GNL3	3	190	1.96545231868626e-25	6.45914860404622e-9	3.59248976057822e-18	0.11717868036497	0.882821313175878	7.53397555277293	rs1866268	rs2564924_AC096887.1	0.309486415621766	3.58645e-23	5e-8	5e-8	1.13744383e-13	rs2564924	AC096887.1
31768069	Impedance of leg (right)	EUR	FB_Brain_mQTL	EUR	mQTL	FB_Brain: SMR	FB_Brain_mQTL	cg11041457	GNL3	3	107	4.42820590739601e-10	0.00000724201036651616	0.00000968698947999046	0.15758130232659	0.842401768230744	5.34582311348623	rs11130321	rs772585020_GNL3	0.311750457921767	3.03885e-11	5e-8	5e-8	3.38567e-11	rs772585020	GNL3
34127677	Cataracts	EUR	FB_Brain_mQTL	EUR	mQTL	FB_Brain: SMR	FB_Brain_mQTL	cg11041457	GNL3	3	70	3.41777396846859e-8	0.00000730646832762879	0.000494916636635644	0.104907981261553	0.894589761455745	8.52737561716476	rs6445528	rs35173917_NEK4	0.18126352728387	9.039e-9	5e-8	5e-8	2.91459e-11	rs35173917	NEK4
34822786	Total hip replacement	EUR	FB_Brain_mQTL	EUR	mQTL	FB_Brain: SMR	FB_Brain_mQTL	cg11041457	GNL3	3	110	1.54132908322487e-14	0.00000517405045740425	3.29170379434659e-10	0.10960802465536	0.890386800964998	8.12337238778487	rs12635140	rs3774355_ITIH1	0.034265095724837	2.523e-13	5e-8	5e-8	9.69399e-13	rs3774355	ITIH1
34822786	Total hip replacement	EUR	ROSMAP_CMC_mQTL	EUR	mQTL	ROSMAP_CMC_mQTL: Brain xQTLServe	ROSMAP_CMC_mQTL	cg18595196	GNL3	3	193	2.82675028561026e-18	2.88217613231543e-9	5.20968992461274e-11	0.0521705660421062	0.947829431023623	18.1678962474481	rs12496476	rs3774355_ITIH1	0.0496342361699758	1.636e-14	5e-8	5e-8	9.46861967e-14	rs3774355	ITIH1
34822786	Total hip replacement	EUR	ROSMAP_CMC_mQTL	EUR	mQTL	ROSMAP_CMC_mQTL: Brain xQTLServe	ROSMAP_CMC_mQTL	cg00845626	GNL3	3	191	6.89285257801491e-40	7.02800501517717e-31	8.29882093531917e-11	0.083699109773809	0.916300890143196	10.9475583745088	rs9714129	rs3774355_ITIH1	0.0369615125981462	3.986e-14	5e-8	5e-8	8.92090998e-36	rs3774355	ITIH1
34822786	Hip osteoarthritis	EUR	ROSMAP_CMC_mQTL	EUR	mQTL	ROSMAP_CMC_mQTL: Brain xQTLServe	ROSMAP_CMC_mQTL	cg00845626	GNL3	3	192	2.78042647219478e-37	5.51994023839123e-31	3.34087348712626e-8	0.0653912667634629	0.934608699827801	14.2925614701505	rs11130323	rs2268023_ITIH1	0.0456024254464826	1.216e-11	5e-8	5e-8	8.92090998e-36	rs2268023	ITIH1
34822786	Hip osteoarthritis	EUR	ROSMAP_CMC_mQTL	EUR	mQTL	ROSMAP_CMC_mQTL: Brain xQTLServe	ROSMAP_CMC_mQTL	cg18595196	GNL3	3	194	1.93098440225258e-15	3.83355525078085e-9	3.54253016500021e-8	0.0693987349368485	0.930601225804294	13.4094840006972	rs2878726	rs2268023_ITIH1	0.0554703116111462	9.798e-12	5e-8	5e-8	9.46861967e-14	rs2268023	ITIH1
31043756	bipolar disorder	EUR	FB_Brain_mQTL	EUR	mQTL	FB_Brain: SMR	FB_Brain_mQTL	cg11041457	GNL3	3	97	1.89217023058217e-8	0.00000452898515027927	0.000354778609858407	0.0840020410623431	0.915638632420947	10.9001950528963	rs12629699	rs2302417_ITIH1	0.138663336346313	3.03899510115528e-8	5e-8	5e-8	6.53709e-12	rs2302417	ITIH1
31043756	bipolar disorder	EUR	ROSMAP_CMC_mQTL	EUR	mQTL	ROSMAP_CMC_mQTL: Brain xQTLServe	ROSMAP_CMC_mQTL	cg00845626	GNL3	3	189	3.88074908113073e-33	1.44807191952625e-30	0.000435115866720491	0.161522124095863	0.838042760037414	5.18840849034426	rs9714129	rs2302417_ITIH1	0.244499218084336	5.54102360146451e-8	5e-8	5e-8	8.92090998e-36	rs2302417	ITIH1
31043756	bipolar disorder	EUR	ROSMAP_CMC_mQTL	EUR	mQTL	ROSMAP_CMC_mQTL: Brain xQTLServe	ROSMAP_CMC_mQTL	cg18595196	GNL3	3	191	3.93740664789113e-11	1.46921346146148e-8	0.000708464370633586	0.263622443605379	0.735669077292477	2.79061625873445	rs1866268	rs2302417_ITIH1	0.0696064893345557	3.37598104855426e-7	5e-8	5e-8	1.13744383e-13	rs2302417	ITIH1
31043756	bipolar disorder	EUR	US_Blood_mQTL	EUR	mQTL	US_Blood: SMR	US_Blood_mQTL	cg08332332	GNL3	3	233	4.43159027909509e-9	0.00000197754451241441	0.000428361287103567	0.190341907462487	0.809227749274306	4.25144289065082	rs12629699	rs2302417_ITIH1	0.0673049017376403	3.03899510115528e-8	5e-8	5e-8	2.20838e-9	rs2302417	ITIH1
31768069	Red blood cell (erythrocyte) count	EUR	FB_Brain_mQTL	EUR	mQTL	FB_Brain: SMR	FB_Brain_mQTL	cg11041457	GNL3	3	107	1.44488405427041e-12	0.00000452750025814701	3.16077818561833e-8	0.098140168265786	0.90185527262473	9.18946124264124	rs1014969	rs2878632_PBRM1	0.0561484635368637	7.15593e-13	5e-8	5e-8	1.11291e-11	rs2878632	PBRM1
32888493	RBC distribution width	EUR	FB_Brain_mQTL	EUR	mQTL	FB_Brain: SMR	FB_Brain_mQTL	cg11041457	GNL3	3	111	1.74960286223553e-12	0.00000404793936904859	3.78362972797724e-8	0.0866259457492202	0.913369968473363	10.5438383451252	rs200377224	rs10933_PBRM1	0.23670505996918	6.54e-13	5e-8	5e-8	2.38477e-12	rs10933	PBRM1
22763110	Osteoarthritis	EUR	Brain-mMeta_mQTL	EUR	mQTL	Brain-mMeta (5 cohorts)	Brain-mMeta_mQTL	cg11041457	GNL3	3	81	1.48219745261589e-12	3.55051682544157e-8	0.00000578581236971025	0.137733471806693	0.862260706874288	6.26035701825958	rs12635140	rs12488461_PBRM1	0.260520253749823	7.897e-9	5e-8	5e-8	7.41806e-13	rs12488461	PBRM1
22763110	Osteoarthritis	EUR	US_Blood_mQTL	EUR	mQTL	US_Blood: SMR	US_Blood_mQTL	cg08332332	GNL3	3	65	7.97686013440522e-11	0.00000224440112943252	0.00000205850900982225	0.0569760094635966	0.943019687546495	16.5511712109114	rs2289249	rs12488461_PBRM1	0.0701205361354767	8.3923e-10	5e-8	5e-8	1.42335e-9	rs12488461	PBRM1
22763110	Osteoarthritis	EUR	LBC_BSGS_mQTL	EUR	mQTL	LBC_BSGS: SMR	LBC_BSGS_mQTL	cg18595196	GNL3	3	338	5.29266883966123e-14	1.54137042518742e-9	0.00000677382684062638	0.196468904274487	0.80352432035725	4.08982949909796	rs2083180	rs12488461_PBRM1	0.106151630894325	2.0034e-8	5e-8	5e-8	2.23799e-14	rs12488461	PBRM1
32888493	hemoglobin concentration	EUR	FB_Brain_mQTL	EUR	mQTL	FB_Brain: SMR	FB_Brain_mQTL	cg11041457	GNL3	3	111	1.76072403582274e-16	0.00000716512900078188	3.80767998755485e-12	0.154104676208332	0.845888158658861	5.48904925841001	rs7638808	rs66782572_NT5DC2	0.17785197419569	1.37e-17	5e-8	5e-8	2.91459e-11	rs66782572	NT5DC2
31768069	Impedance of leg (left)	EUR	Brain-mMeta_mQTL	EUR	mQTL	Brain-mMeta (5 cohorts)	Brain-mMeta_mQTL	cg00150837	GNL3	3	285	1.23705213703273e-22	2.10261694636574e-7	2.54059338062179e-17	0.0422246788536938	0.957775110884614	22.6828275995479	rs1108842	rs772585020_GNL3	0.42778267425671	2.72993e-21	5e-8	5e-8	1.16321e-11	rs772585020	GNL3
34737426	Nervous feelings	EUR	US_Blood_mQTL	EUR	mQTL	US_Blood: SMR	US_Blood_mQTL	cg08332332	GNL3	3	235	3.82059576057451e-11	0.00000191900759530425	0.00000371245204751793	0.185654580842626	0.814339787659524	4.38631669611113	rs1029871	rs2710323_ITIH1	0.0176821897149111	4.55167e-10	5e-8	5e-8	1.74169e-9	rs2710323	ITIH1
34737426	Nervous feelings	EUR	FB_Brain_mQTL	EUR	mQTL	FB_Brain: SMR	FB_Brain_mQTL	cg11041457	GNL3	3	99	3.33032160757881e-10	0.00000453548618514432	0.00000642368992186424	0.0865692931292703	0.913419747361592	10.551313454733	rs12635140	rs2710323_ITIH1	0.04564553638705	2.41055e-9	5e-8	5e-8	9.69399e-13	rs2710323	ITIH1
34822786	Total joint replacement	EUR	ROSMAP_CMC_mQTL	EUR	mQTL	ROSMAP_CMC_mQTL: Brain xQTLServe	ROSMAP_CMC_mQTL	cg18595196	GNL3	3	194	3.44751842170214e-16	4.10453917541349e-9	6.27635185021519e-9	0.0737986554954092	0.926201334123698	12.5503822245287	rs11130321	rs3774354_ITIH1	0.0799372302649006	1.185e-12	5e-8	5e-8	8.61228657e-14	rs3774354	ITIH1
34822786	Total joint replacement	EUR	ROSMAP_CMC_mQTL	EUR	mQTL	ROSMAP_CMC_mQTL: Brain xQTLServe	ROSMAP_CMC_mQTL	cg00845626	GNL3	3	192	9.53472338639841e-38	1.1351830760273e-30	1.11583805443033e-8	0.131981191782402	0.868018797059217	6.5768370881991	rs11130323	rs3774354_ITIH1	0.0369008559233279	5.036e-12	5e-8	5e-8	8.92090998e-36	rs3774354	ITIH1
34822786	Total joint replacement	EUR	FB_Brain_mQTL	EUR	mQTL	FB_Brain: SMR	FB_Brain_mQTL	cg11041457	GNL3	3	110	4.01492295628534e-13	0.00000451333317836584	8.5743773169857e-9	0.0954834437245241	0.904512034367518	9.47297247653838	rs12635140	rs3774354_ITIH1	0.0508927502909961	3.697e-12	5e-8	5e-8	9.69399e-13	rs3774354	ITIH1
31768069	Haemoglobin concentration	EUR	FB_Brain_mQTL	EUR	mQTL	FB_Brain: SMR	FB_Brain_mQTL	cg11041457	GNL3	3	107	4.93191211033571e-13	0.00000489396274415576	1.07888796790738e-8	0.106164799337642	0.893830295910241	8.41927175002269	rs1014969	rs66782572_NT5DC2	0.0450553252358167	3.0237e-13	5e-8	5e-8	1.11291e-11	rs66782572	NT5DC2
30664745	Osteoarthritis of the hip or knee	EUR	FB_Brain_mQTL	EUR	mQTL	FB_Brain: SMR	FB_Brain_mQTL	cg11041457	GNL3	3	100	5.33067447604057e-10	0.00000512123289185583	0.0000104024945158204	0.0990368694771384	0.900947606262388	9.09709294143593	rs12635140	rs3774354_ITIH1	0.0528713562486363	5.708e-9	5e-8	5e-8	9.69399e-13	rs3774354	ITIH1
30664745	Osteoarthritis of the hip or knee	EUR	ROSMAP_CMC_mQTL	EUR	mQTL	ROSMAP_CMC_mQTL: Brain xQTLServe	ROSMAP_CMC_mQTL	cg18595196	GNL3	3	193	3.30396011147401e-14	2.81106739658626e-9	5.94610482137581e-7	0.0496401467918086	0.950359255786607	19.1449727127606	rs8906	rs3774354_ITIH1	0.0675403951640699	1.68e-10	5e-8	5e-8	7.01932177e-14	rs3774354	ITIH1
30664745	Osteoarthritis of the hip or knee	EUR	ROSMAP_CMC_mQTL	EUR	mQTL	ROSMAP_CMC_mQTL: Brain xQTLServe	ROSMAP_CMC_mQTL	cg00845626	GNL3	3	191	1.34498609946408e-35	1.14433783825533e-30	0.00000149950211174086	0.126706986504685	0.873291513993201	6.89221279807572	rs11130319	rs3774354_ITIH1	0.0502616894080193	1.035e-9	5e-8	5e-8	5.06476626e-36	rs3774354	ITIH1
31768069	Haematocrit percentage	EUR	FB_Brain_mQTL	EUR	mQTL	FB_Brain: SMR	FB_Brain_mQTL	cg11041457	GNL3	3	107	3.10911023842976e-13	0.00000515317890179641	6.80138159824429e-9	0.111840998447477	0.888153841571928	7.9412188186877	rs1014969	rs1010554_STAB1	0.0483591557903187	1.77006e-13	5e-8	5e-8	1.11291e-11	rs1010554	STAB1
33888516	Haemorrhoidal disease	EUR	ROSMAP_CMC_mQTL	EUR	mQTL	ROSMAP_CMC_mQTL: Brain xQTLServe	ROSMAP_CMC_mQTL	cg18595196	GNL3	3	191	5.00704056294292e-11	5.56208360469012e-9	0.000929008590023692	0.102302384315905	0.896768601481919	8.76586217885927	rs12486554	rs9847710_SFMBT1	0.104727062601897	8.766e-8	5e-8	5e-8	8.61228657e-14	rs9847710	SFMBT1
33888516	Haemorrhoidal disease	EUR	ROSMAP_CMC_mQTL	EUR	mQTL	ROSMAP_CMC_mQTL: Brain xQTLServe	ROSMAP_CMC_mQTL	cg00845626	GNL3	3	189	1.29574411388515e-32	1.43938022762701e-30	0.00158424723345183	0.175163203346258	0.823252549420289	4.6999171840498	rs67539070	rs9847710_SFMBT1	0.0247567336112373	7.59e-7	5e-8	5e-8	8.92090998e-36	rs9847710	SFMBT1
33888516	Haemorrhoidal disease	EUR	FB_Brain_mQTL	EUR	mQTL	FB_Brain: SMR	FB_Brain_mQTL	cg11041457	GNL3	3	94	2.95075226006925e-9	0.000010350753250165	0.0000531336117386333	0.185569597553563	0.814366915130696	4.38847163472258	rs7638808	rs9847710_SFMBT1	0.417552554746137	3.135e-10	5e-8	5e-8	2.91459e-11	rs9847710	SFMBT1
34822786	Knee and/or hip osteoarthritis	EUR	ROSMAP_CMC_mQTL	EUR	mQTL	ROSMAP_CMC_mQTL: Brain xQTLServe	ROSMAP_CMC_mQTL	cg00845626	GNL3	3	192	1.18611285493162e-33	5.47151261556187e-31	0.000142345866902978	0.0647287076179783	0.93512894651512	14.4468966078258	rs11130319	rs1546737_DNAH1	0.076208288734347	5.245e-8	5e-8	5e-8	5.06476626e-36	rs1546737	DNAH1
34822786	Knee and/or hip osteoarthritis	EUR	ROSMAP_CMC_mQTL	EUR	mQTL	ROSMAP_CMC_mQTL: Brain xQTLServe	ROSMAP_CMC_mQTL	cg18595196	GNL3	3	194	1.14681501954967e-11	5.2902328231785e-9	0.000210276883939342	0.0960965775580135	0.903693140256348	9.40400962470061	rs2878726	rs1546737_DNAH1	0.0436355468484988	6.625e-8	5e-8	5e-8	9.46861967e-14	rs1546737	DNAH1
31768069	Body mass index (BMI)	EUR	Brain-mMeta_mQTL	EUR	mQTL	Brain-mMeta (5 cohorts)	Brain-mMeta_mQTL	cg00150837	GNL3	3	285	4.61771207801674e-11	8.17972752527467e-8	0.00000948361705042363	0.0158149237218551	0.984175510817643	62.2308098430841	rs1108842	rs6798941_STIMATE-MUSTN1	0.424222940614655	1.54195e-9	5e-8	5e-8	1.16321e-11	rs6798941	STIMATE-MUSTN1
