# Supplementary material for: Integrative Genomics Establishes GNL3 as a Pleiotropic Hub and Causal Gene for Osteoarthritis
Source: Research Square preprint supplement (doi:10.21203/rs.3.rs-7630649/v1), 2025-09-29
Supplement: Supplementary file 2 [file 165f28ca598d181690dc023f.xlsx]

## Sheet: Sheet1
PubMed	trait_description	trait_population	qtl	qtl_population	molecule	source	tissue	probe	gene_id	chr	nsnps	pp_h0_abf	pp_h1_abf	pp_h2_abf	pp_h3_abf	pp_h4_abf	pp4_pp3	coloc_snp	locus	snp_pp_h4	gwas_p	p1_threshold	p2_threshold	qtl_p	top_snp	top_snp_gene
30867560	Neuroticism	EUR	Adipose_Subcutaneous_sQTL	EUR	sQTL	GTEx v8	Adipose Subcutaneous	chr3:52686202:52686769:clu_45156:ENSG00000163938.16	GNL3	3	2469	0.0000226236219105205	0.00152484078314571	0.00066762724506496	0.0440445917471445	0.953740316602734	21.6539710954312	rs2071044	rs2071044_ITIH4_AC006254.1	0.448514618844588	4.307e-8	5e-8	5e-8	3.85155e-7	rs2071044	ITIH4_AC006254.1
34002096	Bipolar disorder all type	EUR	Adipose_Subcutaneous_sQTL	EUR	sQTL	GTEx v8	Adipose Subcutaneous	chr3:52686202:52686769:clu_45156:ENSG00000163938.16	GNL3	3	1389	7.44494759850476e-11	0.0011642375823518	2.19040222017473e-9	0.033287864253118	0.96554789589968	29.0060031655301	rs2590838	rs2336147_PBRM1	0.14131163738811	3.736e-13	5e-8	5e-8	7.90086e-7	rs2336147	PBRM1
29483656	Schizophrenia	EUR	Adipose_Subcutaneous_sQTL	EUR	sQTL	GTEx v8	Adipose Subcutaneous	chr3:52686202:52686769:clu_45156:ENSG00000163938.16	GNL3	3	757	2.01419109455335e-7	0.00221050596193936	0.00000159066473603745	0.0164756904147234	0.981312011539492	59.5612072597909	rs2577831	rs2577831_PBRM1	0.54558403187257	6.54e-11	5e-8	5e-8	4.40068E-06	rs2577831	PBRM1
29483656	Schizophrenia	EUR	Adipose_Subcutaneous_sQTL	EUR	sQTL	GTEx v8	Adipose Subcutaneous	chr3:52686202:52686769:clu_45156:ENSG00000163938.16	GNL3	3	1992	2.50999030815465e-9	0.00495290034127105	5.41575892409183e-8	0.105978731680702	0.889068311310449	8.38912013015099	rs4481150	rs1080500_RFT1	0.299635518202484	1.46e-11	5e-8	5e-8	3.58813e-7	rs1080500	RFT1
30867560	Neuroticism	EUR	Adipose_Subcutaneous_sQTL	EUR	sQTL	GTEx v8	Adipose Subcutaneous	chr3:52686202:52686769:clu_45156:ENSG00000163938.16	GNL3	3	2469	0.0000226236219105205	0.00152484078314571	0.00066762724506496	0.0440445917471445	0.953740316602734	21.6539710954312	rs2071044	rs2071044_ITIH4_AC006254.1	0.448514618844588	4.307e-8	5e-8	5e-8	3.85155e-7	rs2071044	ITIH4_AC006254.1
35396580	Schizophrenia	EUR	Adipose_Subcutaneous_sQTL	EUR	sQTL	GTEx v8	Adipose Subcutaneous	chr3:52686202:52686769:clu_45156:ENSG00000163938.16	GNL3	3	1626	1.43176969015644e-16	0.00135539996195732	4.21235186269256e-15	0.0389169480011575	0.959727652036877	24.6609177062994	rs2710323	rs2710323_ITIH1	0.575555365116265	1.229e-19	5e-8	5e-8	1.33245E-06	rs2710323	ITIH1
30239722	Body mass index	EUR	Adipose_Subcutaneous_sQTL	EUR	sQTL	GTEx v8	Adipose Subcutaneous	chr3:52686202:52686769:clu_45156:ENSG00000163938.16	GNL3	3	2424	1.39792315140731e-14	0.00309660895324242	4.12915109669289e-13	0.0905605324301839	0.906342858616148	10.0081441031155	rs2710323	rs2710323_ITIH1	0.918580867566416	3.653e-18	5e-8	5e-8	1.33245E-06	rs2710323	ITIH1
30124842	Body mass index	EUR	Adipose_Subcutaneous_sQTL	EUR	sQTL	GTEx v8	Adipose Subcutaneous	chr3:52686202:52686769:clu_45156:ENSG00000163938.16	GNL3	3	265	1.44879371029278e-14	0.00114166889435502	9.23452132651825e-14	0.0062843528041965	0.992573978301342	157.943707049441	rs2710323	rs2710323_ITIH1	0.993812887717712	4.8e-18	5e-8	5e-8	1.33245E-06	rs2710323	ITIH1
29500382	Nervous	EUR	Adipose_Subcutaneous_sQTL	EUR	sQTL	GTEx v8	Adipose Subcutaneous	chr3:52686202:52686769:clu_45156:ENSG00000163938.16	GNL3	3	2041	0.00000237480501676152	0.00218752888584932	0.0000701501457237784	0.0636840786885018	0.934055867474909	14.6670233237362	rs2710323	rs9879090_PBRM1	0.125269813976673	2.704e-9	5e-8	5e-8	1.33245E-06	rs9879090	PBRM1
25673412	Waist-to-hip ratio adjusted for body mass index	EUR	Adipose_Subcutaneous_sQTL	EUR	sQTL	GTEx v8	Adipose Subcutaneous	chr3:52686202:52686769:clu_45156:ENSG00000163938.16	GNL3	3	478	2.31733796837809e-8	0.00157193015017002	3.39354142276006e-7	0.0220431756320822	0.976384531690227	44.2941864632776	rs13083798	rs2276824_PBRM1	0.41110806971741	4.1e-11	5e-8	5e-8	1.44628E-06	rs2276824	PBRM1
29942085	Worry subcluster	EUR	Adipose_Subcutaneous_sQTL	EUR	sQTL	GTEx v8	Adipose Subcutaneous	chr3:52686202:52686769:clu_45156:ENSG00000163938.16	GNL3	3	1649	9.59483691839973e-8	0.0110228570692559	0.00000141443253720812	0.161667248056081	0.827308384493757	5.1173530473332	rs7612511	rs353547_TWF2	0.131441842629836	2.768e-10	5e-8	5e-8	6.73101e-7	rs353547	TWF2
34002096	Bipolar disorder type I	EUR	Adipose_Visceral_Omentum_sQTL	EUR	sQTL	GTEx v8	Adipose Visceral Omentum	chr3:52686202:52686769:clu_43893:ENSG00000163938.16	GNL3	3	1349	8.68656567444385e-10	0.0000230261250463231	0.00000427807608725213	0.112514683449977	0.887458011480233	7.88748618641217	rs1570	rs7614498_PBRM1	0.0349284720106698	2.27e-9	5e-8	5e-8	3.37267e-9	rs7614498	PBRM1
30124842	Height	EUR	Adipose_Visceral_Omentum_sQTL	EUR	sQTL	GTEx v8	Adipose Visceral Omentum	chr3:52686202:52686769:clu_43893:ENSG00000163938.16	GNL3	3	103	1.06391322458458e-37	0.0000182782148792934	4.82460895202664e-35	0.00729607673668993	0.992685645048426	136.057456750213	rs7652191	rs11720159_PBRM1	0.310162205964004	3.5e-37	5e-8	5e-8	4.60076e-9	rs11720159	PBRM1
34002096	Bipolar disorder all type	EUR	Brain_Caudate_basal_ganglia_sQTL	EUR	sQTL	GTEx v8	Brain Caudate Basal Ganglia	chr3:52686202:52686769:clu_34731:ENSG00000163938.16	GNL3	3	1386	5.8234256546967e-10	0.00910664704547512	1.67834649725338e-9	0.0252802945535312	0.965613056140304	38.1962739435497	rs13083798	rs2336147_PBRM1	0.173409089334794	5.102e-13	5e-8	5e-8	6.93728e-7	rs2336147	PBRM1
29483656	Schizophrenia	EUR	Brain_Caudate_basal_ganglia_sQTL	EUR	sQTL	GTEx v8	Brain Caudate Basal Ganglia	chr3:52686202:52686769:clu_34731:ENSG00000163938.16	GNL3	3	759	0.00000125498954916362	0.0137730819938242	0.00000181186375462989	0.0189172797750077	0.967306571377864	51.1334918594273	rs2577831	rs2577831_PBRM1	0.544740845345311	6.54e-11	5e-8	5e-8	7.61034E-06	rs2577831	PBRM1
23974872	Schizophrenia	EUR	Brain_Caudate_basal_ganglia_sQTL	EUR	sQTL	GTEx v8	Brain Caudate Basal Ganglia	chr3:52686202:52686769:clu_34731:ENSG00000163938.16	GNL3	3	1470	0.00000163198165241793	0.0611096861853409	0.00000401160739588083	0.14942550722333	0.78945916300228	5.28329585538808	rs2535627	rs2535627_ITIH4	0.208299087486064	1.169e-10	5e-8	5e-8	4.28144E-05	rs2535627	ITIH4
35396580	Schizophrenia	EUR	Brain_Caudate_basal_ganglia_sQTL	EUR	sQTL	GTEx v8	Brain Caudate Basal Ganglia	chr3:52686202:52686769:clu_34731:ENSG00000163938.16	GNL3	3	1624	2.23065123021093e-15	0.0211166964446467	6.17509459132199e-15	0.057535840391163	0.921347463164183	16.0134527783085	rs2710323	rs2710323_ITIH1	0.467847898205773	1.229e-19	5e-8	5e-8	7.58491E-06	rs2710323	ITIH1
30643258	Automobile speeding propensity	EUR	Brain_Caudate_basal_ganglia_sQTL	EUR	sQTL	GTEx v8	Brain Caudate Basal Ganglia	chr3:52686202:52686769:clu_34731:ENSG00000163938.16	GNL3	3	1707	0.00020564753961105	0.00970678703201742	0.00059040621381792	0.0269052220456751	0.962591937168878	35.7771415353776	rs13083798	rs13083798_PBRM1	0.263969374341339	4.516e-8	5e-8	5e-8	6.93728e-7	rs13083798	PBRM1
30239722	Body mass index	EUR	Brain_Caudate_basal_ganglia_sQTL	EUR	sQTL	GTEx v8	Brain Caudate Basal Ganglia	chr3:52686202:52686769:clu_34731:ENSG00000163938.16	GNL3	3	2349	2.23317577532688e-13	0.0494683654983001	6.35304096912049e-13	0.139919264856489	0.810612369644353	5.79342930707774	rs2710323	rs2710323_ITIH1	0.822083068250623	3.653e-18	5e-8	5e-8	7.58491E-06	rs2710323	ITIH1
29500382	Nervous	EUR	Brain_Caudate_basal_ganglia_sQTL	EUR	sQTL	GTEx v8	Brain Caudate Basal Ganglia	chr3:52686202:52686769:clu_34731:ENSG00000163938.16	GNL3	3	2009	0.000020706314911042	0.0190734105865727	0.000060355165538982	0.0546693684021757	0.926176159530801	16.9414095424951	rs13081155	rs9879090_PBRM1	0.120647842176387	4.717e-9	5e-8	5e-8	1.30086E-06	rs9879090	PBRM1
30239722	Waist-to-hip ratio adjusted for body mass index	EUR	Brain_Caudate_basal_ganglia_sQTL	EUR	sQTL	GTEx v8	Brain Caudate Basal Ganglia	chr3:52686202:52686769:clu_34731:ENSG00000163938.16	GNL3	3	2093	2.86138829944005e-33	0.0315269714315807	8.39914429722989e-33	0.0916655372020513	0.876807491366364	9.56529049116557	rs2276824	rs2276824_PBRM1	0.997286308925272	8.897e-38	5e-8	5e-8	1.95229E-05	rs2276824	PBRM1
25673412	Waist-to-hip ratio adjusted for body mass index	EUR	Brain_Caudate_basal_ganglia_sQTL	EUR	sQTL	GTEx v8	Brain Caudate Basal Ganglia	chr3:52686202:52686769:clu_34731:ENSG00000163938.16	GNL3	3	478	1.32718936385586e-7	0.00900278252243961	1.50033340012372e-7	0.00919547669104918	0.981801458034234	106.770044775375	rs13083798	rs2276824_PBRM1	0.683298714643509	4.1e-11	5e-8	5e-8	6.93728e-7	rs2276824	PBRM1
29942085	Worry subcluster	EUR	Brain_Caudate_basal_ganglia_sQTL	EUR	sQTL	GTEx v8	Brain Caudate Basal Ganglia	chr3:52686202:52686769:clu_34731:ENSG00000163938.16	GNL3	3	1617	5.33095421247014e-7	0.0612437237700699	0.00000135393699514077	0.154760661182946	0.783993728014568	5.06584633344122	rs13081155	rs353547_TWF2	0.0970522144901538	2.41e-10	5e-8	5e-8	1.30086E-06	rs353547	TWF2
34002096	Bipolar disorder type I	EUR	Brain_Cerebellar_Hemisphere_sQTL	EUR	sQTL	GTEx v8	Brain Cerebellar Hemisphere	chr3:52686105:52686769:clu_36428:ENSG00000163938.16	GNL3	3	1340	6.39868501678955e-9	0.00016961469612824	0.00000439065615417625	0.115502059748794	0.884323928500238	7.65634769131873	rs1570	rs7614498_PBRM1	0.0315467805275528	2.27e-9	5e-8	5e-8	1.18537e-9	rs7614498	PBRM1
34002096	Bipolar disorder type I	EUR	Brain_Cerebellar_Hemisphere_sQTL	EUR	sQTL	GTEx v8	Brain Cerebellar Hemisphere	chr3:52686202:52686769:clu_36428:ENSG00000163938.16	GNL3	3	1340	5.82147541680144e-12	1.54314172560139e-7	0.0000042594407852697	0.112020185037092	0.887975401202129	7.92692317824777	rs1570	rs7614498_PBRM1	0.0441308279156169	2.27e-9	5e-8	5e-8	2.16316e-14	rs7614498	PBRM1
34002096	Bipolar disorder all type	EUR	Brain_Cerebellar_Hemisphere_sQTL	EUR	sQTL	GTEx v8	Brain Cerebellar Hemisphere	chr3:52686105:52686769:clu_36428:ENSG00000163938.16	GNL3	3	1378	1.12834033495037e-11	0.00017644935793362	7.80506526238271e-9	0.121176615258735	0.878646927566984	7.25096113380382	rs2336147	rs2336147_PBRM1	0.14379431379595	3.615e-13	5e-8	5e-8	3.47274e-9	rs2336147	PBRM1
34002096	Bipolar disorder all type	EUR	Brain_Cerebellar_Hemisphere_sQTL	EUR	sQTL	GTEx v8	Brain Cerebellar Hemisphere	chr3:52686202:52686769:clu_36428:ENSG00000163938.16	GNL3	3	1378	4.73873325951821e-15	7.41040991942809e-8	3.51428868206808e-9	0.0540102999239576	0.945989622457649	17.5149855451559	rs2336147	rs2336147_PBRM1	0.164205280855292	3.615e-13	5e-8	5e-8	3.11121e-14	rs2336147	PBRM1
29483656	Schizophrenia	EUR	Brain_Cerebellar_Hemisphere_sQTL	EUR	sQTL	GTEx v8	Brain Cerebellar Hemisphere	chr3:52686105:52686769:clu_36428:ENSG00000163938.16	GNL3	3	756	3.49451769917568e-8	0.00038351138399598	0.0000141717842925127	0.154685576357826	0.844916705528708	5.46215571886424	rs2577831	rs2577831_PBRM1	0.508324814460567	6.54e-11	5e-8	5e-8	3.82619e-8	rs2577831	PBRM1
29483656	Schizophrenia	EUR	Brain_Cerebellar_Hemisphere_sQTL	EUR	sQTL	GTEx v8	Brain Cerebellar Hemisphere	chr3:52686202:52686769:clu_36428:ENSG00000163938.16	GNL3	3	756	2.36218454247131e-11	2.59241686871639e-7	0.0000105753412493941	0.115175945600851	0.88481321979259	7.68227441221937	rs2336147	rs2577831_PBRM1	0.399746211258163	7.36e-10	5e-8	5e-8	3.11121e-14	rs2577831	PBRM1
30952852	Sleep efficiency	EUR	Brain_Cerebellar_Hemisphere_sQTL	EUR	sQTL	GTEx v8	Brain Cerebellar Hemisphere	chr3:52686202:52686769:clu_36428:ENSG00000163938.16	GNL3	3	1479	4.22931024059503e-10	4.42709000028367e-7	0.00018909755657814	0.197137855326501	0.802672603984989	4.07163100489045	rs4687637	rs13094687_PHF7	0.0557739847530842	5.4e-8	5e-8	5e-8	2.16316e-14	rs13094687	PHF7
30643256	Well being spectrum	EUR	Brain_Cerebellar_Hemisphere_sQTL	EUR	sQTL	GTEx v8	Brain Cerebellar Hemisphere	chr3:52686105:52686769:clu_36428:ENSG00000163938.16	GNL3	3	392	0.00000985236307408399	0.0321618360515228	0.0000237090776210026	0.0765040879466388	0.891300514561144	11.6503645554578	rs352169	rs352163_ALAS1	0.0910155464437334	3.201e-10	5e-8	5e-8	1.0601e-05	rs352163	ALAS1
35396580	Schizophrenia	EUR	Brain_Cerebellar_Hemisphere_sQTL	EUR	sQTL	GTEx v8	Brain Cerebellar Hemisphere	chr3:52686105:52686769:clu_36428:ENSG00000163938.16	GNL3	3	461	1.00026172709562e-10	0.00508111088591323	1.81609827618542e-10	0.00823870200169703	0.986680186830754	119.761606455424	rs6445358	rs6445358_WDR82	0.29061184817009	3.45e-14	5e-8	5e-8	6.13545e-7	rs6445358	WDR82
35396580	Schizophrenia	EUR	Brain_Cerebellar_Hemisphere_sQTL	EUR	sQTL	GTEx v8	Brain Cerebellar Hemisphere	chr3:52686202:52686769:clu_36428:ENSG00000163938.16	GNL3	3	1616	3.15244534618793e-20	2.98429582053018e-7	2.26784061932445e-14	0.213901439146036	0.786098262424357	3.67504896443294	rs1108842	rs2710323_ITIH1	0.145662128681498	2.758e-18	5e-8	5e-8	3.11121e-14	rs2710323	ITIH1
35396580	Schizophrenia	EUR	Brain_Cerebellar_Hemisphere_sQTL	EUR	sQTL	GTEx v8	Brain Cerebellar Hemisphere	chr3:52686202:52686769:clu_36428:ENSG00000163938.16	GNL3	3	461	1.48634967584272e-12	0.0000755033139189188	1.22648048694438e-10	0.00523556379485475	0.994688932767092	189.986975947963	rs6445358	rs6445358_WDR82	0.290612796460895	3.45e-14	5e-8	5e-8	9.63835e-10	rs6445358	WDR82
30643258	Automobile speeding propensity	EUR	Brain_Cerebellar_Hemisphere_sQTL	EUR	sQTL	GTEx v8	Brain Cerebellar Hemisphere	chr3:52686105:52686769:clu_36428:ENSG00000163938.16	GNL3	3	1692	0.00000435466890084173	0.00020554442744337	0.00295343325410817	0.13854650984675	0.858290157802796	6.1949605136367	rs35212380	rs13083798_PBRM1	0.131411535179882	6.68e-8	5e-8	5e-8	3.47274e-9	rs13083798	PBRM1
30643258	Automobile speeding propensity	EUR	Brain_Cerebellar_Hemisphere_sQTL	EUR	sQTL	GTEx v8	Brain Cerebellar Hemisphere	chr3:52686202:52686769:clu_36428:ENSG00000163938.16	GNL3	3	1692	1.86006236954252e-9	8.77966760418188e-8	0.00135056583327106	0.0628121278400137	0.935837216669977	14.8989892374544	rs35212380	rs13083798_PBRM1	0.150457647249523	6.68e-8	5e-8	5e-8	3.11121e-14	rs13083798	PBRM1
30124842	Body mass index	EUR	Brain_Cerebellar_Hemisphere_sQTL	EUR	sQTL	GTEx v8	Brain Cerebellar Hemisphere	chr3:52686105:52686769:clu_36428:ENSG00000163938.16	GNL3	3	265	2.39115269829532e-14	0.00188426042845339	2.80677405991e-12	0.220399848237812	0.777715891330903	3.5286589239923	rs2710323	rs2710323_ITIH1	0.998322353239233	4.8e-18	5e-8	5e-8	2.0791e-7	rs2710323	ITIH1
30124842	Height	EUR	Brain_Cerebellar_Hemisphere_sQTL	EUR	sQTL	GTEx v8	Brain Cerebellar Hemisphere	chr3:52686105:52686769:clu_36428:ENSG00000163938.16	GNL3	3	103	8.54433816497363e-37	0.0001467932208867	5.22925524858719e-35	0.00799209066526101	0.991861116113853	124.105338347217	rs11720159	rs11720159_PBRM1	0.191614403812192	2.2e-37	5e-8	5e-8	4.37203e-9	rs11720159	PBRM1
30124842	Height	EUR	Brain_Cerebellar_Hemisphere_sQTL	EUR	sQTL	GTEx v8	Brain Cerebellar Hemisphere	chr3:52686202:52686769:clu_36428:ENSG00000163938.16	GNL3	3	103	9.84811656588292e-40	1.69192361358064e-7	6.3886716631433e-35	0.00998583542107142	0.990013995386564	99.1418297659407	rs2878628	rs11720159_PBRM1	0.288404794407003	5.4e-37	5e-8	5e-8	2.16316e-14	rs11720159	PBRM1
29500382	Nervous	EUR	Brain_Cerebellar_Hemisphere_sQTL	EUR	sQTL	GTEx v8	Brain Cerebellar Hemisphere	chr3:52686202:52686769:clu_36428:ENSG00000163938.16	GNL3	3	1847	1.97770887914375e-10	1.82173595743625e-7	0.00014549119589988	0.133150261655669	0.866704064777066	6.50921788661887	rs13081155	rs9879090_PBRM1	0.171585550424346	4.717e-9	5e-8	5e-8	3.11121e-14	rs9879090	PBRM1
25673412	Waist-to-hip ratio adjusted for body mass index	EUR	Brain_Cerebellar_Hemisphere_sQTL	EUR	sQTL	GTEx v8	Brain Cerebellar Hemisphere	chr3:52686105:52686769:clu_36428:ENSG00000163938.16	GNL3	3	477	5.69853870556613e-9	0.00038655154996801	0.00000126992060186086	0.0852287143335991	0.914383458497291	10.7285844406645	rs13083798	rs2276824_PBRM1	0.649385359278486	4.1e-11	5e-8	5e-8	6.62661e-9	rs2276824	PBRM1
25673412	Waist-to-hip ratio adjusted for body mass index	EUR	Brain_Cerebellar_Hemisphere_sQTL	EUR	sQTL	GTEx v8	Brain Cerebellar Hemisphere	chr3:52686202:52686769:clu_36428:ENSG00000163938.16	GNL3	3	477	2.88169727899186e-12	1.95475473149787e-7	6.24371544050201e-7	0.0413946724601025	0.958604507689999	23.1576782885269	rs13083798	rs2276824_PBRM1	0.589724144789194	4.1e-11	5e-8	5e-8	1.12481e-13	rs2276824	PBRM1
29500382	Worry	EUR	Brain_Cerebellar_Hemisphere_sQTL	EUR	sQTL	GTEx v8	Brain Cerebellar Hemisphere	chr3:52686105:52686769:clu_36428:ENSG00000163938.16	GNL3	3	920	0.00011520690797806	0.0248047859994406	0.0002829536809809	0.0600069517249569	0.914790101686644	15.2447354079841	rs9311474	rs353547_TWF2	0.189614835148189	2.014e-8	5e-8	5e-8	6.13545e-7	rs353547	TWF2
29500382	Worry	EUR	Brain_Cerebellar_Hemisphere_sQTL	EUR	sQTL	GTEx v8	Brain Cerebellar Hemisphere	chr3:52686202:52686769:clu_36428:ENSG00000163938.16	GNL3	3	920	0.00000188875401050465	0.00040666084923548	0.00022376580577087	0.0472260711652368	0.952141613425746	20.1613555803604	rs9311474	rs353547_TWF2	0.200015127420629	2.014e-8	5e-8	5e-8	9.63835e-10	rs353547	TWF2
34002096	Bipolar disorder type I	EUR	Brain_Cerebellum_sQTL	EUR	sQTL	GTEx v8	Brain Cerebellum	chr3:52686105:52686769:clu_38249:ENSG00000163938.16	GNL3	3	1335	1.31149788880895e-10	0.00000347648484320617	0.0000065909087103138	0.173884005540881	0.826105926934416	4.75090232919781	rs2590838	rs7614498_PBRM1	0.133920805281479	5.894e-9	5e-8	5e-8	5.55563e-13	rs7614498	PBRM1
34002096	Bipolar disorder type I	EUR	Brain_Cerebellum_sQTL	EUR	sQTL	GTEx v8	Brain Cerebellum	chr3:52686202:52686769:clu_38249:ENSG00000163938.16	GNL3	3	1335	1.48316961877639e-14	3.93154784584722e-10	0.000006549446152684	0.172783823036289	0.827209627124389	4.78754094328988	rs3774349	rs7614498_PBRM1	0.133259640609764	4.565e-9	5e-8	5e-8	3.4437e-18	rs7614498	PBRM1
34002096	Bipolar disorder all type	EUR	Brain_Cerebellum_sQTL	EUR	sQTL	GTEx v8	Brain Cerebellum	chr3:52686105:52686769:clu_38249:ENSG00000163938.16	GNL3	3	1374	1.90393204574399e-14	2.97736043473187e-7	9.47087442697876e-10	0.0138243357891293	0.98617536552772	71.3361842890995	rs2590838	rs2336147_PBRM1	0.173525046489096	3.736e-13	5e-8	5e-8	5.55563e-13	rs2336147	PBRM1
34002096	Bipolar disorder all type	EUR	Brain_Cerebellum_sQTL	EUR	sQTL	GTEx v8	Brain Cerebellum	chr3:52686202:52686769:clu_38249:ENSG00000163938.16	GNL3	3	1374	2.08259222395317e-18	3.25674842394674e-11	9.08313715672452e-10	0.0132173867298106	0.986782612329307	74.6579208508523	rs2590838	rs2336147_PBRM1	0.16309752872972	3.736e-13	5e-8	5e-8	2.40661e-18	rs2336147	PBRM1
29483656	Schizophrenia	EUR	Brain_Cerebellum_sQTL	EUR	sQTL	GTEx v8	Brain Cerebellum	chr3:52686105:52686769:clu_38249:ENSG00000163938.16	GNL3	3	753	1.13260627626409e-10	0.0000012429967014237	0.00000156609445749856	0.0162035581027195	0.983793632692861	60.7146668933008	rs2590838	rs2577831_PBRM1	0.506537300785264	7.87e-10	5e-8	5e-8	5.55563e-13	rs2577831	PBRM1
29483656	Schizophrenia	EUR	Brain_Cerebellum_sQTL	EUR	sQTL	GTEx v8	Brain Cerebellum	chr3:52686202:52686769:clu_38249:ENSG00000163938.16	GNL3	3	753	1.40890391061361e-14	1.5462239175402e-10	0.00000148813681344913	0.0153471418503405	0.98465136985821	64.1586152952879	rs2590838	rs2577831_PBRM1	0.529678842686347	7.87e-10	5e-8	5e-8	2.40661e-18	rs2577831	PBRM1
30643256	Well being spectrum	EUR	Brain_Cerebellum_sQTL	EUR	sQTL	GTEx v8	Brain Cerebellum	chr3:52686105:52686769:clu_38249:ENSG00000163938.16	GNL3	3	392	0.00000317196691949973	0.0103544986374032	0.000036674962775265	0.118850181636846	0.870755472796056	7.32649677773906	rs352139	rs352163_ALAS1	0.284591221950304	5.715e-10	5e-8	5e-8	3.22019e-7	rs352163	ALAS1
35396580	Schizophrenia	EUR	Brain_Cerebellum_sQTL	EUR	sQTL	GTEx v8	Brain Cerebellum	chr3:52686105:52686769:clu_38249:ENSG00000163938.16	GNL3	3	1612	1.53500143284866e-19	0.00000145312538601106	7.14200112648357e-15	0.0666771897585176	0.933321357116091	13.9976108845659	rs11130324	rs2710323_ITIH1	0.169628842641684	3.312e-18	5e-8	5e-8	5.55563e-13	rs2710323	ITIH1
35396580	Schizophrenia	EUR	Brain_Cerebellum_sQTL	EUR	sQTL	GTEx v8	Brain Cerebellum	chr3:52686105:52686769:clu_38249:ENSG00000163938.16	GNL3	3	469	1.69585623005903e-11	0.00086145788828187	1.33037676484282e-10	0.0057646492117255	0.993373892749997	172.321655015788	rs6445358	rs6445358_WDR82	0.350046426158139	3.45e-14	5e-8	5e-8	8.87117e-8	rs6445358	WDR82
35396580	Schizophrenia	EUR	Brain_Cerebellum_sQTL	EUR	sQTL	GTEx v8	Brain Cerebellum	chr3:52686202:52686769:clu_38249:ENSG00000163938.16	GNL3	3	1612	1.72321205108957e-23	1.63129696385457e-10	7.02734201257297e-15	0.0655906691228026	0.934409330714059	14.2460710221541	rs11130324	rs2710323_ITIH1	0.163669002361343	3.312e-18	5e-8	5e-8	2.40661e-18	rs2710323	ITIH1
35396580	Schizophrenia	EUR	Brain_Cerebellum_sQTL	EUR	sQTL	GTEx v8	Brain Cerebellum	chr3:52686202:52686769:clu_38249:ENSG00000163938.16	GNL3	3	469	4.82247497507674e-12	0.00024497118533315	1.14239520571489e-10	0.00480817102493563	0.99494685767067	206.928341881098	rs6445358	rs6445358_WDR82	0.355332682959564	3.45e-14	5e-8	5e-8	1.45672e-8	rs6445358	WDR82
30643258	Automobile speeding propensity	EUR	Brain_Cerebellum_sQTL	EUR	sQTL	GTEx v8	Brain Cerebellum	chr3:52686105:52686769:clu_38249:ENSG00000163938.16	GNL3	3	1699	7.67750990397616e-9	3.62389017672188e-7	0.00037347949868809	0.0166457651771784	0.982980385257605	59.0528807053752	rs7612511	rs13083798_PBRM1	0.150776607675974	7.759e-8	5e-8	5e-8	5.55563e-13	rs13083798	PBRM1
30643258	Automobile speeding propensity	EUR	Brain_Cerebellum_sQTL	EUR	sQTL	GTEx v8	Brain Cerebellum	chr3:52686202:52686769:clu_38249:ENSG00000163938.16	GNL3	3	1699	8.57790615423733e-13	4.04888957982116e-11	0.00036496740285682	0.0162435714810581	0.983391461074737	60.5403474366144	rs7612511	rs13083798_PBRM1	0.144485625573127	7.759e-8	5e-8	5e-8	2.40661e-18	rs13083798	PBRM1
30239722	Body mass index	EUR	Brain_Cerebellum_sQTL	EUR	sQTL	GTEx v8	Brain Cerebellum	chr3:52686202:52686769:clu_38249:ENSG00000163938.16	GNL3	3	824	2.95439806204171e-8	0.00478811329672857	6.89723435629849e-7	0.110897304045008	0.884313863390848	7.9741691739589	rs353547	rs353547_TWF2	0.998344994172281	2.134e-13	5e-8	5e-8	9.99564e-7	rs353547	TWF2
30124842	Body mass index	EUR	Brain_Cerebellum_sQTL	EUR	sQTL	GTEx v8	Brain Cerebellum	chr3:52686105:52686769:clu_38249:ENSG00000163938.16	GNL3	3	265	6.28282444768308e-16	0.0000495095001424566	3.13869248187404e-13	0.0237571247736621	0.976193365725883	41.090551782938	rs2710323	rs2710323_ITIH1	0.999920810019265	4.8e-18	5e-8	5e-8	1.71157e-9	rs2710323	ITIH1
30124842	Body mass index	EUR	Brain_Cerebellum_sQTL	EUR	sQTL	GTEx v8	Brain Cerebellum	chr3:52686202:52686769:clu_38249:ENSG00000163938.16	GNL3	3	265	6.12132754358494e-19	4.82368828565476e-8	8.86074689549548e-14	0.00598837593695228	0.994011575826074	165.990176016231	rs2710323	rs2710323_ITIH1	0.999989599447587	4.8e-18	5e-8	5e-8	9.66995e-14	rs2710323	ITIH1
30124842	Height	EUR	Brain_Cerebellum_sQTL	EUR	sQTL	GTEx v8	Brain Cerebellum	chr3:52686105:52686769:clu_38249:ENSG00000163938.16	GNL3	3	103	3.69248585952175e-37	0.0000634375515027969	8.63473214030399e-35	0.0138485324859396	0.98608802996256	71.2052364366935	rs11720159	rs11720159_PBRM1	0.220358574543578	2.2e-37	5e-8	5e-8	2.02573e-9	rs11720159	PBRM1
30124842	Height	EUR	Brain_Cerebellum_sQTL	EUR	sQTL	GTEx v8	Brain Cerebellum	chr3:52686202:52686769:clu_38249:ENSG00000163938.16	GNL3	3	103	1.44519973490703e-39	2.48287836711899e-7	5.94468351029219e-35	0.00922229256194474	0.990777459150224	107.43288097784	rs11720159	rs11720159_PBRM1	0.220546868381326	2.2e-37	5e-8	5e-8	7.53298e-13	rs11720159	PBRM1
29500382	Nervous	EUR	Brain_Cerebellum_sQTL	EUR	sQTL	GTEx v8	Brain Cerebellum	chr3:52686105:52686769:clu_38249:ENSG00000163938.16	GNL3	3	1922	8.42785250983424e-10	7.76321214443223e-7	0.0000414063603795178	0.0371781773104162	0.962779639165203	25.8963647175748	rs11130324	rs9879090_PBRM1	0.171959461603374	5.315e-9	5e-8	5e-8	5.55563e-13	rs9879090	PBRM1
29500382	Nervous	EUR	Brain_Cerebellum_sQTL	EUR	sQTL	GTEx v8	Brain Cerebellum	chr3:52686202:52686769:clu_38249:ENSG00000163938.16	GNL3	3	1922	9.23420206125897e-14	8.50597106468781e-11	0.0000398258491717024	0.0357208492658363	0.96423932479984	26.9937401998459	rs11130324	rs9879090_PBRM1	0.161987860259044	5.315e-9	5e-8	5e-8	2.40661e-18	rs9879090	PBRM1
25673412	Waist-to-hip ratio adjusted for body mass index	EUR	Brain_Cerebellum_sQTL	EUR	sQTL	GTEx v8	Brain Cerebellum	chr3:52686105:52686769:clu_38249:ENSG00000163938.16	GNL3	3	478	1.79919274766765e-11	0.00000122045440268926	2.45644246920882e-7	0.0156785752780787	0.984319958605279	62.7812120136658	rs1108842	rs2276824_PBRM1	0.480750309891668	5.7e-11	5e-8	5e-8	9.63688e-13	rs2276824	PBRM1
25673412	Waist-to-hip ratio adjusted for body mass index	EUR	Brain_Cerebellum_sQTL	EUR	sQTL	GTEx v8	Brain Cerebellum	chr3:52686202:52686769:clu_38249:ENSG00000163938.16	GNL3	3	478	2.77809876591325e-15	1.88448006716328e-10	3.05590061320963e-7	0.0197489755546565	0.98025071866683	49.6355224074245	rs1108842	rs2276824_PBRM1	0.747452244076689	5.7e-11	5e-8	5e-8	3.4437e-18	rs2276824	PBRM1
29500382	Worry	EUR	Brain_Cerebellum_sQTL	EUR	sQTL	GTEx v8	Brain Cerebellum	chr3:52686105:52686769:clu_38249:ENSG00000163938.16	GNL3	3	914	0.0000196401379969554	0.00422852649893879	0.00022588466284994	0.0476851822149689	0.947840766485245	19.8770503216764	rs9311474	rs353547_TWF2	0.198506989386823	2.014e-8	5e-8	5e-8	1.01815e-7	rs353547	TWF2
29500382	Worry	EUR	Brain_Cerebellum_sQTL	EUR	sQTL	GTEx v8	Brain Cerebellum	chr3:52686202:52686769:clu_38249:ENSG00000163938.16	GNL3	3	914	0.00000536644284659792	0.00115539645319181	0.00020238721033414	0.0426179968731882	0.956018853020439	22.4322803313614	rs9311474	rs353547_TWF2	0.217422012369064	2.014e-8	5e-8	5e-8	1.3878e-8	rs353547	TWF2
29942085	Worry subcluster	EUR	Brain_Cerebellum_sQTL	EUR	sQTL	GTEx v8	Brain Cerebellum	chr3:52686105:52686769:clu_38249:ENSG00000163938.16	GNL3	3	1535	9.3412925929346e-11	0.0000255204437373116	8.30554717353204e-7	0.226133996968048	0.773839651940084	3.42204030493223	rs11130324	rs9836178_STIMATE-MUSTN1_STIMATE	0.664099470483674	2.302e-10	5e-8	5e-8	5.55563e-13	rs9836178	STIMATE-MUSTN1_STIMATE
29942085	Worry subcluster	EUR	Brain_Cerebellum_sQTL	EUR	sQTL	GTEx v8	Brain Cerebellum	chr3:52686105:52686769:clu_38249:ENSG00000163938.16	GNL3	3	1573	3.40979813897115e-11	0.0000039172860750908	0.000001344553599054	0.153620279464044	0.846374458662184	5.50952297193475	rs7612511	rs353547_TWF2	0.190694206746168	2.768e-10	5e-8	5e-8	5.55563e-13	rs353547	TWF2
29942085	Worry subcluster	EUR	Brain_Cerebellum_sQTL	EUR	sQTL	GTEx v8	Brain Cerebellum	chr3:52686202:52686769:clu_38249:ENSG00000163938.16	GNL3	3	1535	1.01956400981729e-14	2.78545240824704e-9	8.257495920476e-7	0.224819895445202	0.775179276019746	3.44800122998318	rs11130324	rs9836178_STIMATE-MUSTN1_STIMATE	0.670154910123618	2.302e-10	5e-8	5e-8	2.40661e-18	rs9836178	STIMATE-MUSTN1_STIMATE
29942085	Worry subcluster	EUR	Brain_Cerebellum_sQTL	EUR	sQTL	GTEx v8	Brain Cerebellum	chr3:52686202:52686769:clu_38249:ENSG00000163938.16	GNL3	3	1573	3.84109780178074e-15	4.41277703803243e-10	0.00000130169213028867	0.14869128273872	0.851307415127869	5.72533506637229	rs7612511	rs353547_TWF2	0.17863367209228	2.768e-10	5e-8	5e-8	2.40661e-18	rs353547	TWF2
34002096	Bipolar disorder type I	EUR	Brain_Cortex_sQTL	EUR	sQTL	GTEx v8	Brain Cortex	chr3:52686202:52686769:clu_35745:ENSG00000163938.16	GNL3	3	1341	0.00000132282639611365	0.0350651418047002	0.00000801868219427429	0.211804043287694	0.753121473399015	3.55574644236629	rs3774349	rs7614498_PBRM1	0.0991641871740141	4.565e-9	5e-8	5e-8	6.60258e-7	rs7614498	PBRM1
34002096	Bipolar disorder all type	EUR	Brain_Cortex_sQTL	EUR	sQTL	GTEx v8	Brain Cortex	chr3:52686202:52686769:clu_35745:ENSG00000163938.16	GNL3	3	1380	2.74943977644247e-10	0.00429956165000045	1.67273935531972e-9	0.0251877106483363	0.970512725753981	38.5312003660835	rs2336147	rs2336147_PBRM1	0.143673440618397	3.615e-13	5e-8	5e-8	6.60258e-7	rs2336147	PBRM1
35396580	Schizophrenia	EUR	Brain_Cortex_sQTL	EUR	sQTL	GTEx v8	Brain Cortex	chr3:52686202:52686769:clu_35745:ENSG00000163938.16	GNL3	3	1616	1.55475830914632e-15	0.0147182844249168	9.0487511778403e-15	0.0847604414248564	0.900521274150214	10.6243108107048	rs2710323	rs2710323_ITIH1	0.175623477922645	1.229e-19	5e-8	5e-8	3.44283E-05	rs2710323	ITIH1
29500382	Nervous	EUR	Brain_Cortex_sQTL	EUR	sQTL	GTEx v8	Brain Cortex	chr3:52686202:52686769:clu_35745:ENSG00000163938.16	GNL3	3	1971	0.0000101081255182949	0.00931098957731948	0.0000621122855394789	0.0562797173269024	0.934337072684721	16.6016660541771	rs7646741	rs9879090_PBRM1	0.13311461314312	4.305e-9	5e-8	5e-8	6.75945e-7	rs9879090	PBRM1
30239722	Waist-to-hip ratio adjusted for body mass index	EUR	Brain_Cortex_sQTL	EUR	sQTL	GTEx v8	Brain Cortex	chr3:52686202:52686769:clu_35745:ENSG00000163938.16	GNL3	3	2014	2.60890291524689e-33	0.0287461466949421	1.60464801297883e-32	0.176012592043919	0.79524126126114	4.51809300702025	rs2276824	rs2276824_PBRM1	0.995647706456921	8.897e-38	5e-8	5e-8	2.85774E-05	rs2276824	PBRM1
25673412	Waist-to-hip ratio adjusted for body mass index	EUR	Brain_Cortex_sQTL	EUR	sQTL	GTEx v8	Brain Cortex	chr3:52686202:52686769:clu_35745:ENSG00000163938.16	GNL3	3	478	1.14867262500835e-7	0.00779184200390642	2.38785976002382e-7	0.0152206879848976	0.976987116357957	64.1881048561899	rs13083798	rs2276824_PBRM1	0.556357668368265	4.1e-11	5e-8	5e-8	1.19735E-06	rs2276824	PBRM1
29942085	Worry subcluster	EUR	Brain_Cortex_sQTL	EUR	sQTL	GTEx v8	Brain Cortex	chr3:52686202:52686769:clu_35745:ENSG00000163938.16	GNL3	3	1590	1.65818212850535e-7	0.0190497311908971	8.4604644483267e-7	0.0963119074208872	0.884637349523559	9.18512957756775	rs353547	rs353547_TWF2	0.195342083239854	4.807e-12	5e-8	5e-8	2.48655E-05	rs353547	TWF2
34002096	Bipolar disorder type I	EUR	Brain_Frontal_Cortex_BA9_sQTL	EUR	sQTL	GTEx v8	Brain Frontal Cortex Ba9	chr3:52686202:52686769:clu_33235:ENSG00000163938.16	GNL3	3	1349	3.55407978866603e-8	0.00094210633616316	0.00000770273909664473	0.203386564729112	0.795663590654832	3.91207546926497	rs2590838	rs7614498_PBRM1	0.0415842151684578	5.894e-9	5e-8	5e-8	2.81504e-9	rs7614498	PBRM1
34002096	Bipolar disorder all type	EUR	Brain_Frontal_Cortex_BA9_sQTL	EUR	sQTL	GTEx v8	Brain Frontal Cortex Ba9	chr3:52686202:52686769:clu_33235:ENSG00000163938.16	GNL3	3	1388	1.13871017248114e-11	0.00017807098850101	2.55896632916449e-9	0.0390562355432479	0.960765690897899	24.5995467185776	rs2577831	rs2336147_PBRM1	0.242384055462123	3.834e-13	5e-8	5e-8	1.27213e-9	rs2336147	PBRM1
29483656	Schizophrenia	EUR	Brain_Frontal_Cortex_BA9_sQTL	EUR	sQTL	GTEx v8	Brain Frontal Cortex Ba9	chr3:52686202:52686769:clu_33235:ENSG00000163938.16	GNL3	3	757	8.60563971405909e-9	0.0000944439587352621	8.57636798474409e-7	0.00842078724710274	0.991483902551725	117.742424010636	rs2577831	rs2577831_PBRM1	0.888758539709087	6.54e-11	5e-8	5e-8	1.27213e-9	rs2577831	PBRM1
35396580	Schizophrenia	EUR	Brain_Frontal_Cortex_BA9_sQTL	EUR	sQTL	GTEx v8	Brain Frontal Cortex Ba9	chr3:52686202:52686769:clu_33235:ENSG00000163938.16	GNL3	3	1626	3.00694371418534e-17	0.00028465551574634	6.31836308389082e-15	0.0588726115007234	0.940842732983523	15.9809919927191	rs2710323	rs2710323_ITIH1	0.670078831130673	1.229e-19	5e-8	5e-8	4.9315e-9	rs2710323	ITIH1
30643258	Automobile speeding propensity	EUR	Brain_Frontal_Cortex_BA9_sQTL	EUR	sQTL	GTEx v8	Brain Frontal Cortex Ba9	chr3:52686202:52686769:clu_33235:ENSG00000163938.16	GNL3	3	1700	0.00000568059943972228	0.00026812862167628	0.0012658960966395	0.0588116115807155	0.939648683101529	15.9772646565197	rs7612511	rs13083798_PBRM1	0.132917511172089	7.759e-8	5e-8	5e-8	2.98484e-9	rs13083798	PBRM1
30239722	Body mass index	EUR	Brain_Frontal_Cortex_BA9_sQTL	EUR	sQTL	GTEx v8	Brain Frontal Cortex Ba9	chr3:52686202:52686769:clu_33235:ENSG00000163938.16	GNL3	3	2192	2.67446552514817e-15	0.00059243734101615	5.6354945404087e-13	0.123959864982072	0.875447697676347	7.06235	rs2710323	rs2710323_ITIH1	0.990396775963259	3.653e-18	5e-8	5e-8	4.9315e-9	rs2710323	ITIH1
30124842	Body mass index	EUR	Brain_Frontal_Cortex_BA9_sQTL	EUR	sQTL	GTEx v8	Brain Frontal Cortex Ba9	chr3:52686202:52686769:clu_33235:ENSG00000163938.16	GNL3	3	265	2.73454553320982e-15	0.00021548585925543	1.23221013220441e-13	0.00871891567252023	0.991065598468099	113.668446363311	rs2710323	rs2710323_ITIH1	0.999852913032152	4.8e-18	5e-8	5e-8	4.9315e-9	rs2710323	ITIH1
30124842	Height	EUR	Brain_Frontal_Cortex_BA9_sQTL	EUR	sQTL	GTEx v8	Brain Frontal Cortex Ba9	chr3:52686202:52686769:clu_33235:ENSG00000163938.16	GNL3	3	103	1.02066929760298e-35	0.00175352766665432	7.47023086297224e-35	0.0118475881136064	0.986398884219734	83.2573579332066	rs11720159	rs11720159_PBRM1	0.193525227028057	2.2e-37	5e-8	5e-8	1.84118e-7	rs11720159	PBRM1
29500382	Nervous	EUR	Brain_Frontal_Cortex_BA9_sQTL	EUR	sQTL	GTEx v8	Brain Frontal Cortex Ba9	chr3:52686202:52686769:clu_33235:ENSG00000163938.16	GNL3	3	1861	2.41698256431513e-7	0.00022263675068239	0.0000542744981567531	0.0490434665970142	0.950679380455891	19.3844246017016	rs9879090	rs9879090_PBRM1	0.161974544812796	1.595e-9	5e-8	5e-8	3.38365e-9	rs9879090	PBRM1
30239722	Waist-to-hip ratio adjusted for body mass index	EUR	Brain_Frontal_Cortex_BA9_sQTL	EUR	sQTL	GTEx v8	Brain Frontal Cortex Ba9	chr3:52686202:52686769:clu_33235:ENSG00000163938.16	GNL3	3	1943	1.2901151465414e-35	0.00014214576768836	2.89845761616295e-33	0.0309665125690805	0.968891341663237	31.2883583355349	rs2276824	rs2276824_PBRM1	0.999468213438859	8.897e-38	5e-8	5e-8	3.38365e-9	rs2276824	PBRM1
25673412	Waist-to-hip ratio adjusted for body mass index	EUR	Brain_Frontal_Cortex_BA9_sQTL	EUR	sQTL	GTEx v8	Brain Frontal Cortex Ba9	chr3:52686202:52686769:clu_33235:ENSG00000163938.16	GNL3	3	478	3.71452872907351e-9	0.00025196927606507	2.92293013064282e-7	0.0188463403022885	0.980901394414105	52.0473141565311	rs2710323	rs2276824_PBRM1	0.384379788756734	4.9e-11	5e-8	5e-8	4.9315e-9	rs2276824	PBRM1
29942085	Worry subcluster	EUR	Brain_Frontal_Cortex_BA9_sQTL	EUR	sQTL	GTEx v8	Brain Frontal Cortex Ba9	chr3:52686202:52686769:clu_33235:ENSG00000163938.16	GNL3	3	1531	2.05712022168882e-8	0.00562005997708955	7.13402640149601e-7	0.194101584855431	0.800277621193638	4.12298344596049	rs2710323	rs9836178_STIMATE-MUSTN1_STIMATE	0.618160614884428	3.639e-11	5e-8	5e-8	4.9315e-9	rs9836178	STIMATE-MUSTN1_STIMATE
34002096	Bipolar disorder type I	EUR	Cells_Cultured_fibroblasts_sQTL	EUR	sQTL	GTEx v8	Cells Cultured Fibroblasts	chr3:52686105:52686769:clu_36158:ENSG00000163938.16	GNL3	3	1319	1.25398883177216e-21	3.32404126477615e-17	0.00000598772586532942	0.157878978441894	0.842115033832239	5.33392755731678	rs35212380	rs7614498_PBRM1	0.292895009509998	4.798e-9	5e-8	5e-8	1.40944e-24	rs7614498	PBRM1
34002096	Bipolar disorder type I	EUR	Cells_Cultured_fibroblasts_sQTL	EUR	sQTL	GTEx v8	Cells Cultured Fibroblasts	chr3:52686202:52686769:clu_36158:ENSG00000163938.16	GNL3	3	1319	2.04527946904504e-22	5.42157408491215e-18	0.00000598257036912472	0.157742181075173	0.842251836354458	5.33942050638364	rs35212380	rs7614498_PBRM1	0.308736931252737	4.798e-9	5e-8	5e-8	1.599e-25	rs7614498	PBRM1
34002096	Bipolar disorder all type	EUR	Cells_Cultured_fibroblasts_sQTL	EUR	sQTL	GTEx v8	Cells Cultured Fibroblasts	chr3:52686105:52686769:clu_36158:ENSG00000163938.16	GNL3	3	1358	1.83692138324642e-25	2.87256945979421e-18	8.79982964130968e-10	0.0127739082230517	0.987226090896966	77.2845767840594	rs35212380	rs2336147_PBRM1	0.322909490382265	4.395e-13	5e-8	5e-8	1.40944e-24	rs2336147	PBRM1
34002096	Bipolar disorder all type	EUR	Cells_Cultured_fibroblasts_sQTL	EUR	sQTL	GTEx v8	Cells Cultured Fibroblasts	chr3:52686202:52686769:clu_36158:ENSG00000163938.16	GNL3	3	1358	2.9871385727259e-26	4.67127396656508e-19	8.77070680568811e-10	0.012728320474949	0.987271678647978	77.5649607967568	rs35212380	rs2336147_PBRM1	0.33958324136896	4.395e-13	5e-8	5e-8	1.599e-25	rs2336147	PBRM1
29483656	Schizophrenia	EUR	Cells_Cultured_fibroblasts_sQTL	EUR	sQTL	GTEx v8	Cells Cultured Fibroblasts	chr3:52686105:52686769:clu_36158:ENSG00000163938.16	GNL3	3	743	2.31167968431827e-21	2.53698934349397e-17	0.00000148677446519589	0.0153321746146083	0.984666338610929	64.2222230936995	rs2336147	rs2577831_PBRM1	0.874034624334382	7.36e-10	5e-8	5e-8	3.82568e-24	rs2577831	PBRM1
29483656	Schizophrenia	EUR	Cells_Cultured_fibroblasts_sQTL	EUR	sQTL	GTEx v8	Cells Cultured Fibroblasts	chr3:52686202:52686769:clu_36158:ENSG00000163938.16	GNL3	3	743	3.85366755392356e-22	4.22926826064822e-18	0.0000014759680863888	0.0152134595795061	0.984785064452405	64.7311717171153	rs2336147	rs2577831_PBRM1	0.870722352936471	7.36e-10	5e-8	5e-8	4.74901e-25	rs2577831	PBRM1
35396580	Schizophrenia	EUR	Cells_Cultured_fibroblasts_sQTL	EUR	sQTL	GTEx v8	Cells Cultured Fibroblasts	chr3:52686105:52686769:clu_36158:ENSG00000163938.16	GNL3	3	469	1.79844332833388e-13	0.00000913569891338726	1.77199198597741e-9	0.0891024303406752	0.910888432188239	10.222935880711	rs6445358	rs6445358_WDR82	0.286574470943863	3.45e-14	5e-8	5e-8	3.26744e-9	rs6445358	WDR82
35396580	Schizophrenia	EUR	Cells_Cultured_fibroblasts_sQTL	EUR	sQTL	GTEx v8	Cells Cultured Fibroblasts	chr3:52686105:52686769:clu_36158:ENSG00000163938.16	GNL3	3	1595	1.13461759576665e-30	1.07409778032819e-17	5.5028231613719e-15	0.0511442032675813	0.948855796732414	18.5525579852734	rs7646741	rs2710323_ITIH1	0.383148012140688	1.682e-18	5e-8	5e-8	1.93607e-24	rs2710323	ITIH1
35396580	Schizophrenia	EUR	Cells_Cultured_fibroblasts_sQTL	EUR	sQTL	GTEx v8	Cells Cultured Fibroblasts	chr3:52686202:52686769:clu_36158:ENSG00000163938.16	GNL3	3	469	6.6497665776158e-14	0.0000033779360372553	1.22613580915111e-9	0.0613463681454376	0.938650252692324	15.3008284119935	rs6445358	rs6445358_WDR82	0.286863078608286	3.45e-14	5e-8	5e-8	9.38986e-10	rs6445358	WDR82
35396580	Schizophrenia	EUR	Cells_Cultured_fibroblasts_sQTL	EUR	sQTL	GTEx v8	Cells Cultured Fibroblasts	chr3:52686202:52686769:clu_36158:ENSG00000163938.16	GNL3	3	1595	1.84332241000623e-31	1.74500070896495e-18	5.4999556038134e-15	0.0511170300566207	0.948882969943369	18.5629518947466	rs7646741	rs2710323_ITIH1	0.377475681229454	1.682e-18	5e-8	5e-8	2.38196e-25	rs2710323	ITIH1
30643258	Automobile speeding propensity	EUR	Cells_Cultured_fibroblasts_sQTL	EUR	sQTL	GTEx v8	Cells Cultured Fibroblasts	chr3:52686105:52686769:clu_36158:ENSG00000163938.16	GNL3	3	1695	7.40854843488069e-20	3.49679469521394e-18	0.00035782233771976	0.0159052834498609	0.983736894212419	61.849692733456	rs35212380	rs13083798_PBRM1	0.334415114898591	6.68e-8	5e-8	5e-8	1.40944e-24	rs13083798	PBRM1
30643258	Automobile speeding propensity	EUR	Cells_Cultured_fibroblasts_sQTL	EUR	sQTL	GTEx v8	Cells Cultured Fibroblasts	chr3:52686202:52686769:clu_36158:ENSG00000163938.16	GNL3	3	1695	1.20309457024061e-20	5.67854114478202e-19	0.00035652058424894	0.0158437785851762	0.983799700830571	62.0937546899978	rs35212380	rs13083798_PBRM1	0.351567257222605	6.68e-8	5e-8	5e-8	1.599e-25	rs13083798	PBRM1
30239722	Body mass index	EUR	Cells_Cultured_fibroblasts_sQTL	EUR	sQTL	GTEx v8	Cells Cultured Fibroblasts	chr3:52686105:52686769:clu_36158:ENSG00000163938.16	GNL3	3	848	2.75642945433006e-11	0.00000446720729474254	2.72622131193166e-7	0.0432257351736812	0.956769524969328	22.1342568524288	rs353547	rs353547_TWF2	0.907461956497651	2.134e-13	5e-8	5e-8	1.25714e-9	rs353547	TWF2
30239722	Body mass index	EUR	Cells_Cultured_fibroblasts_sQTL	EUR	sQTL	GTEx v8	Cells Cultured Fibroblasts	chr3:52686202:52686769:clu_36158:ENSG00000163938.16	GNL3	3	848	1.78897926412888e-11	0.00000289930917923747	3.31164814748463e-7	0.0527229506769359	0.947273818831182	17.9670106977828	rs353547	rs353547_TWF2	0.893506439957467	2.134e-13	5e-8	5e-8	7.65643e-10	rs353547	TWF2
30124842	Body mass index	EUR	Cells_Cultured_fibroblasts_sQTL	EUR	sQTL	GTEx v8	Cells Cultured Fibroblasts	chr3:52686105:52686769:clu_36158:ENSG00000163938.16	GNL3	3	265	7.65065996495272e-26	6.02882276560181e-15	1.82563548871396e-13	0.013399652402452	0.986600347597361	73.6288015513612	rs2710323	rs2710323_ITIH1	0.999999960621197	4.8e-18	5e-8	5e-8	2.9671e-20	rs2710323	ITIH1
30124842	Body mass index	EUR	Cells_Cultured_fibroblasts_sQTL	EUR	sQTL	GTEx v8	Cells Cultured Fibroblasts	chr3:52686202:52686769:clu_36158:ENSG00000163938.16	GNL3	3	265	8.86479733377993e-27	6.98557931252522e-16	1.13868096435002e-13	0.00798093981143651	0.992019060188449	124.298526693173	rs2710323	rs2710323_ITIH1	0.999999970149887	4.8e-18	5e-8	5e-8	2.29289e-21	rs2710323	ITIH1
30124842	Height	EUR	Cells_Cultured_fibroblasts_sQTL	EUR	sQTL	GTEx v8	Cells Cultured Fibroblasts	chr3:52686105:52686769:clu_36158:ENSG00000163938.16	GNL3	3	103	4.60910782368605e-47	7.91852768218585e-15	3.16166587121126e-35	0.00443623337953234	0.995563766620464	224.416454556639	rs11720159	rs11720159_PBRM1	0.227631893350181	2.2e-37	5e-8	5e-8	6.7611e-20	rs11720159	PBRM1
30124842	Height	EUR	Cells_Cultured_fibroblasts_sQTL	EUR	sQTL	GTEx v8	Cells Cultured Fibroblasts	chr3:52686202:52686769:clu_36158:ENSG00000163938.16	GNL3	3	103	9.18706049492302e-48	1.57835302687246e-15	3.16063897382478e-35	0.00443446738590679	0.995565532614095	224.506224981631	rs11720159	rs11720159_PBRM1	0.227642046594412	2.2e-37	5e-8	5e-8	1.02417e-20	rs11720159	PBRM1
29500382	Nervous	EUR	Cells_Cultured_fibroblasts_sQTL	EUR	sQTL	GTEx v8	Cells Cultured Fibroblasts	chr3:52686105:52686769:clu_36158:ENSG00000163938.16	GNL3	3	2000	7.51830888583214e-21	6.92542093431006e-18	0.0000367429604859284	0.0328783544910486	0.967084902548469	29.4140299147807	rs7646741	rs9879090_PBRM1	0.300294022939318	4.305e-9	5e-8	5e-8	1.93607e-24	rs9879090	PBRM1
29500382	Nervous	EUR	Cells_Cultured_fibroblasts_sQTL	EUR	sQTL	GTEx v8	Cells Cultured Fibroblasts	chr3:52686202:52686769:clu_36158:ENSG00000163938.16	GNL3	3	2000	1.23045741097945e-21	1.13342450305975e-18	0.0000369116019177219	0.0330338526583943	0.96692923573969	29.2708587683908	rs7646741	rs9879090_PBRM1	0.297414526187649	4.305e-9	5e-8	5e-8	2.38196e-25	rs9879090	PBRM1
25673412	Waist-to-hip ratio adjusted for body mass index	EUR	Cells_Cultured_fibroblasts_sQTL	EUR	sQTL	GTEx v8	Cells Cultured Fibroblasts	chr3:52686105:52686769:clu_36158:ENSG00000163938.16	GNL3	3	477	2.14099678732818e-22	1.45231223567594e-17	1.42303402540131e-7	0.00866159414206854	0.991338263554529	114.452172116873	rs1108842	rs2276824_PBRM1	0.713460651784687	5.7e-11	5e-8	5e-8	3.82568e-24	rs2276824	PBRM1
25673412	Waist-to-hip ratio adjusted for body mass index	EUR	Cells_Cultured_fibroblasts_sQTL	EUR	sQTL	GTEx v8	Cells Cultured Fibroblasts	chr3:52686202:52686769:clu_36158:ENSG00000163938.16	GNL3	3	477	3.6100586076172e-23	2.44882772285359e-18	1.4320367639771e-7	0.00872272396502724	0.991277132831297	113.643070307591	rs1108842	rs2276824_PBRM1	0.720865758130501	5.7e-11	5e-8	5e-8	4.74901e-25	rs2276824	PBRM1
29500382	Worry	EUR	Cells_Cultured_fibroblasts_sQTL	EUR	sQTL	GTEx v8	Cells Cultured Fibroblasts	chr3:52686105:52686769:clu_36158:ENSG00000163938.16	GNL3	3	943	3.09036920526988e-8	0.00000665398059152833	0.00075320414145481	0.161337080144405	0.837903030829856	5.19349321358666	rs353547	rs353547_TWF2	0.6540184053446	1.799e-9	5e-8	5e-8	1.25714e-9	rs353547	TWF2
29500382	Worry	EUR	Cells_Cultured_fibroblasts_sQTL	EUR	sQTL	GTEx v8	Cells Cultured Fibroblasts	chr3:52686202:52686769:clu_36158:ENSG00000163938.16	GNL3	3	943	1.73559685146418e-8	0.00000373697348027768	0.00076457510050744	0.163787859801852	0.835443810768191	5.10076761353922	rs353547	rs353547_TWF2	0.5532039606333	1.799e-9	5e-8	5e-8	7.65643e-10	rs353547	TWF2
29942085	Worry subcluster	EUR	Cells_Cultured_fibroblasts_sQTL	EUR	sQTL	GTEx v8	Cells Cultured Fibroblasts	chr3:52686105:52686769:clu_36158:ENSG00000163938.16	GNL3	3	1616	3.70675191528492e-22	4.25843779559646e-17	0.00000132705616020646	0.15160816009145	0.848390512852388	5.59594227870477	rs35212380	rs353547_TWF2	0.290357316148444	3.757e-10	5e-8	5e-8	1.40944e-24	rs353547	TWF2
29942085	Worry subcluster	EUR	Cells_Cultured_fibroblasts_sQTL	EUR	sQTL	GTEx v8	Cells Cultured Fibroblasts	chr3:52686105:52686769:clu_36158:ENSG00000163938.16	GNL3	3	1652	5.35821446882922e-22	1.46386628564372e-16	6.58918895986227e-7	0.179196096493018	0.820803244588088	4.58047502513576	rs7646741	rs9836178_STIMATE-MUSTN1_STIMATE	0.997033969156644	1.533e-10	5e-8	5e-8	1.93607e-24	rs9836178	STIMATE-MUSTN1_STIMATE
29942085	Worry subcluster	EUR	Cells_Cultured_fibroblasts_sQTL	EUR	sQTL	GTEx v8	Cells Cultured Fibroblasts	chr3:52686202:52686769:clu_36158:ENSG00000163938.16	GNL3	3	1616	6.06237388765386e-23	6.96465333646099e-18	0.00000133232178932969	0.152213698325037	0.847784969353171	5.56970219291836	rs35212380	rs353547_TWF2	0.306606852289244	3.757e-10	5e-8	5e-8	1.599e-25	rs353547	TWF2
29942085	Worry subcluster	EUR	Cells_Cultured_fibroblasts_sQTL	EUR	sQTL	GTEx v8	Cells Cultured Fibroblasts	chr3:52686202:52686769:clu_36158:ENSG00000163938.16	GNL3	3	1652	8.73274880842225e-23	2.38579038521352e-17	6.58863468434869e-7	0.179180938506296	0.820818402630235	4.58094711118723	rs7646741	rs9836178_STIMATE-MUSTN1_STIMATE	0.996207999216737	1.533e-10	5e-8	5e-8	2.38196e-25	rs9836178	STIMATE-MUSTN1_STIMATE
34002096	Bipolar disorder type I	EUR	Cells_EBV-transformed_lymphocytes_sQTL	EUR	sQTL	GTEx v8	Cells Ebv-Transformed Lymphocytes	chr3:52686105:52686769:clu_31737:ENSG00000163938.16	GNL3	3	1303	4.48963315781944e-7	0.0119010036178192	0.0000066260976167307	0.174829621955871	0.813262299365378	4.65174202327483	rs3774349	rs7614498_PBRM1	0.136083500668048	4.565e-9	5e-8	5e-8	2.22241e-8	rs7614498	PBRM1
34002096	Bipolar disorder type I	EUR	Cells_EBV-transformed_lymphocytes_sQTL	EUR	sQTL	GTEx v8	Cells Ebv-Transformed Lymphocytes	chr3:52686202:52686769:clu_31737:ENSG00000163938.16	GNL3	3	1303	3.10817098118824e-7	0.00823905936000517	0.000006627973081684	0.174875720314293	0.816878281535522	4.6711932340716	rs3774349	rs7614498_PBRM1	0.142739908831802	4.565e-9	5e-8	5e-8	1.16903e-8	rs7614498	PBRM1
34002096	Bipolar disorder all type	EUR	Cells_EBV-transformed_lymphocytes_sQTL	EUR	sQTL	GTEx v8	Cells Ebv-Transformed Lymphocytes	chr3:52686105:52686769:clu_31737:ENSG00000163938.16	GNL3	3	1342	7.68034788983309e-11	0.00120104937476369	1.17635507466646e-9	0.0174144036033402	0.981384545768738	56.3547605833889	rs13083798	rs2336147_PBRM1	0.182365580834673	5.102e-13	5e-8	5e-8	1.52735e-8	rs2336147	PBRM1
34002096	Bipolar disorder all type	EUR	Cells_EBV-transformed_lymphocytes_sQTL	EUR	sQTL	GTEx v8	Cells Ebv-Transformed Lymphocytes	chr3:52686202:52686769:clu_31737:ENSG00000163938.16	GNL3	3	1342	5.0466168889832e-11	0.00078918769645952	1.11175554228991e-9	0.016402775509678	0.98280803563164	59.9171789586319	rs13083798	rs2336147_PBRM1	0.175081287735107	5.102e-13	5e-8	5e-8	8.55586e-9	rs2336147	PBRM1
29483656	Schizophrenia	EUR	Cells_EBV-transformed_lymphocytes_sQTL	EUR	sQTL	GTEx v8	Cells Ebv-Transformed Lymphocytes	chr3:52686105:52686769:clu_31737:ENSG00000163938.16	GNL3	3	727	2.12673683294414e-7	0.00233402076012762	0.0000013935973851875	0.0143109000421372	0.983353472926666	68.7136008239359	rs2577831	rs2577831_PBRM1	0.347429572301033	6.54e-11	5e-8	5e-8	3.80673e-7	rs2577831	PBRM1
29483656	Schizophrenia	EUR	Cells_EBV-transformed_lymphocytes_sQTL	EUR	sQTL	GTEx v8	Cells Ebv-Transformed Lymphocytes	chr3:52686202:52686769:clu_31737:ENSG00000163938.16	GNL3	3	727	1.40657988316842e-7	0.0015436731979425	0.00000129447434976817	0.0132211784719387	0.985233713197781	74.5193565981198	rs2577831	rs2577831_PBRM1	0.363546290833862	6.54e-11	5e-8	5e-8	1.823e-7	rs2577831	PBRM1
35396580	Schizophrenia	EUR	Cells_EBV-transformed_lymphocytes_sQTL	EUR	sQTL	GTEx v8	Cells Ebv-Transformed Lymphocytes	chr3:52686105:52686769:clu_31737:ENSG00000163938.16	GNL3	3	1579	5.08832954155023e-16	0.00481692112527534	7.88844809360902e-15	0.0737554028190194	0.921427676055696	12.4930193699395	rs13083798	rs2710323_ITIH1	0.20855624388848	2.959e-18	5e-8	5e-8	1.52735e-8	rs2710323	ITIH1
35396580	Schizophrenia	EUR	Cells_EBV-transformed_lymphocytes_sQTL	EUR	sQTL	GTEx v8	Cells Ebv-Transformed Lymphocytes	chr3:52686202:52686769:clu_31737:ENSG00000163938.16	GNL3	3	1579	3.36937586796617e-16	0.003189655399649	7.52060476432835e-15	0.0702680603221846	0.926542284278161	13.1858241145393	rs13083798	rs2710323_ITIH1	0.20119631749496	2.959e-18	5e-8	5e-8	8.55586e-9	rs2710323	ITIH1
30643258	Automobile speeding propensity	EUR	Cells_EBV-transformed_lymphocytes_sQTL	EUR	sQTL	GTEx v8	Cells Ebv-Transformed Lymphocytes	chr3:52686105:52686769:clu_31737:ENSG00000163938.16	GNL3	3	1669	0.0000276899270343712	0.00130692526839936	0.00042942328096101	0.01928922283902	0.978946738684585	50.7509683959004	rs13083798	rs13083798_PBRM1	0.292341807566771	4.516e-8	5e-8	5e-8	1.52735e-8	rs13083798	PBRM1
30643258	Automobile speeding propensity	EUR	Cells_EBV-transformed_lymphocytes_sQTL	EUR	sQTL	GTEx v8	Cells Ebv-Transformed Lymphocytes	chr3:52686202:52686769:clu_31737:ENSG00000163938.16	GNL3	3	1669	0.0000183055737286263	0.00086399710727993	0.00040829939803966	0.0182907336109528	0.980418664309998	53.6019322769484	rs13083798	rs13083798_PBRM1	0.282509694219379	4.516e-8	5e-8	5e-8	8.55586e-9	rs13083798	PBRM1
30124842	Body mass index	EUR	Cells_EBV-transformed_lymphocytes_sQTL	EUR	sQTL	GTEx v8	Cells Ebv-Transformed Lymphocytes	chr3:52686105:52686769:clu_31737:ENSG00000163938.16	GNL3	3	265	3.58784320354002e-13	0.0282726861264255	7.35493819508322e-13	0.0570432163100349	0.914684097562447	16.0349320520613	rs2710323	rs2710323_ITIH1	0.999856578593923	4.8e-18	5e-8	5e-8	5.03792E-06	rs2710323	ITIH1
30124842	Body mass index	EUR	Cells_EBV-transformed_lymphocytes_sQTL	EUR	sQTL	GTEx v8	Cells Ebv-Transformed Lymphocytes	chr3:52686202:52686769:clu_31737:ENSG00000163938.16	GNL3	3	265	2.59969857366216e-13	0.0204859737805559	6.59819527985867e-13	0.0510662168304277	0.928447809388097	18.1812530282228	rs2710323	rs2710323_ITIH1	0.999872185199029	4.8e-18	5e-8	5e-8	2.84326E-06	rs2710323	ITIH1
29500382	Nervous	EUR	Cells_EBV-transformed_lymphocytes_sQTL	EUR	sQTL	GTEx v8	Cells Ebv-Transformed Lymphocytes	chr3:52686105:52686769:clu_31737:ENSG00000163938.16	GNL3	3	1999	0.00000227993875291511	0.00210014539333799	0.0000359529576923533	0.0321520390313705	0.965709582678846	30.0357181619682	rs13081155	rs9879090_PBRM1	0.12476052494892	4.717e-9	5e-8	5e-8	2.22241e-8	rs9879090	PBRM1
29500382	Nervous	EUR	Cells_EBV-transformed_lymphocytes_sQTL	EUR	sQTL	GTEx v8	Cells Ebv-Transformed Lymphocytes	chr3:52686202:52686769:clu_31737:ENSG00000163938.16	GNL3	3	1999	0.00000159036751273767	0.00146495295161763	0.0000360703907208929	0.0322596833054316	0.966237702984717	29.9518657339711	rs13081155	rs9879090_PBRM1	0.132551265406355	4.717e-9	5e-8	5e-8	1.16903e-8	rs9879090	PBRM1
30239722	Waist-to-hip ratio adjusted for body mass index	EUR	Cells_EBV-transformed_lymphocytes_sQTL	EUR	sQTL	GTEx v8	Cells Ebv-Transformed Lymphocytes	chr3:52686105:52686769:clu_31737:ENSG00000163938.16	GNL3	3	2098	1.60905044804888e-34	0.00177311448041912	2.52898283889475e-33	0.0268971320328618	0.971329753486713	36.1127629629799	rs2276824	rs2276824_PBRM1	0.998866934445747	8.897e-38	5e-8	5e-8	7.38297e-8	rs2276824	PBRM1
30239722	Waist-to-hip ratio adjusted for body mass index	EUR	Cells_EBV-transformed_lymphocytes_sQTL	EUR	sQTL	GTEx v8	Cells Ebv-Transformed Lymphocytes	chr3:52686202:52686769:clu_31737:ENSG00000163938.16	GNL3	3	2098	1.27300508416246e-34	0.00140280483505825	2.87657165739426e-33	0.030730896570362	0.967866298594574	31.4948929777734	rs2276824	rs2276824_PBRM1	0.998659834621443	8.897e-38	5e-8	5e-8	5.10758e-8	rs2276824	PBRM1
25673412	Waist-to-hip ratio adjusted for body mass index	EUR	Cells_EBV-transformed_lymphocytes_sQTL	EUR	sQTL	GTEx v8	Cells Ebv-Transformed Lymphocytes	chr3:52686105:52686769:clu_31737:ENSG00000163938.16	GNL3	3	478	1.72193914703751e-8	0.00116805062486452	1.09205558574356e-7	0.00641537267810161	0.992416450272086	154.693499515566	rs13083798	rs2276824_PBRM1	0.721221110904504	4.1e-11	5e-8	5e-8	1.52735e-8	rs2276824	PBRM1
25673412	Waist-to-hip ratio adjusted for body mass index	EUR	Cells_EBV-transformed_lymphocytes_sQTL	EUR	sQTL	GTEx v8	Cells Ebv-Transformed Lymphocytes	chr3:52686202:52686769:clu_31737:ENSG00000163938.16	GNL3	3	478	1.18790364606716e-8	0.0008057959530421	1.05115092327793e-7	0.00613726189065338	0.993056825162177	161.80779684089	rs13083798	rs2276824_PBRM1	0.728086870285732	4.1e-11	5e-8	5e-8	8.55586e-9	rs2276824	PBRM1
29942085	Worry subcluster	EUR	Cells_EBV-transformed_lymphocytes_sQTL	EUR	sQTL	GTEx v8	Cells Ebv-Transformed Lymphocytes	chr3:52686105:52686769:clu_31737:ENSG00000163938.16	GNL3	3	1625	1.05499606586084e-7	0.0121201409745269	0.00000162286780077717	0.185638137985327	0.80223999267274	4.32152574562104	rs13081155	rs353547_TWF2	0.181913941283158	2.41e-10	5e-8	5e-8	2.22241e-8	rs353547	TWF2
29942085	Worry subcluster	EUR	Cells_EBV-transformed_lymphocytes_sQTL	EUR	sQTL	GTEx v8	Cells Ebv-Transformed Lymphocytes	chr3:52686202:52686769:clu_31737:ENSG00000163938.16	GNL3	3	1625	7.04409627035712e-8	0.00809248892935007	0.00000155904313967973	0.178294379985257	0.813611501601289	4.56330424811239	rs13081155	rs353547_TWF2	0.182853145604032	2.41e-10	5e-8	5e-8	1.16903e-8	rs353547	TWF2
30867560	Neuroticism	EUR	BrainMeta_cis_sQTL		sQTL	Qi et al. 2022	Dorsolateral Prefrontal Cortex (dPFC)	chr3:52720121:52720785:clu_139982_	GNL3	3	2138	6.42365195262073e-11	4.61174382066731e-9	0.00109707107699266	0.0778411563203306	0.921061767926697	11.8325807511949	rs2071044	rs2071044_ITIH4_AC006254.1	0.429645710912056	4.307e-8	5e-8	5e-8	1.16832e-12	rs2071044	ITIH4_AC006254.1
30643258	Automobile speeding propensity	EUR	BrainMeta_cis_sQTL		sQTL	Qi et al. 2022	Dorsolateral Prefrontal Cortex (dPFC)	ENSG00000163938.17	GNL3	3	1677	1.33019755122251e-43	6.35278790829e-42	0.00037026650503926	0.0167003430971849	0.982929390397773	58.8568381306767	rs1108842	rs13083798_PBRM1	0.195307950457742	7.759e-8	5e-8	5e-8	8.34613e-47	rs13083798	PBRM1
30643258	Automobile speeding propensity	EUR	BrainMeta_cis_sQTL		sQTL	Qi et al. 2022	Dorsolateral Prefrontal Cortex (dPFC)	chr3:52720075:52720785:clu_139982_	GNL3	3	1887	2.47345084867151e-7	0.0000118142106550624	0.00058783156335392	0.0271049392066736	0.972295167674232	35.8715125778567	rs1108842	rs13083798_PBRM1	0.139007687866185	7.759e-8	5e-8	5e-8	7.40018e-9	rs13083798	PBRM1
30643258	Automobile speeding propensity	EUR	BrainMeta_cis_sQTL		sQTL	Qi et al. 2022	Dorsolateral Prefrontal Cortex (dPFC)	chr3:52720121:52720785:clu_139982_	GNL3	3	1887	2.54399640008738e-11	1.21511649978795e-9	0.00043809454059555	0.0199455667613237	0.979616337457525	49.1144899104642	rs35212380	rs13083798_PBRM1	0.180256786102112	6.68e-8	5e-8	5e-8	4.10747e-13	rs13083798	PBRM1
30643258	Automobile speeding propensity	EUR	BrainMeta_cis_sQTL		sQTL	Qi et al. 2022	Dorsolateral Prefrontal Cortex (dPFC)	chr3:52720218:52720785:clu_139982_	GNL3	3	1887	7.89590400366148e-32	3.77140597968664e-30	0.00037398111460651	0.0168801183295924	0.982745900555799	58.2191357529144	rs3774349	rs13083798_PBRM1	0.236850551634254	7.878e-8	5e-8	5e-8	1.2515e-34	rs13083798	PBRM1
30239722	Body mass index	EUR	BrainMeta_cis_sQTL		sQTL	Qi et al. 2022	Dorsolateral Prefrontal Cortex (dPFC)	chr3:52720075:52720785:clu_139982_	GNL3	3	2057	2.26316389679994e-16	0.0000503646595684411	5.37847687890035e-13	0.118811986382215	0.881137648957678	7.41623531251367	rs2710323	rs2710323_ITIH1	0.982987727119384	3.653e-18	5e-8	5e-8	2.71843e-8	rs2710323	ITIH1
30239722	Body mass index	EUR	BrainMeta_cis_sQTL		sQTL	Qi et al. 2022	Dorsolateral Prefrontal Cortex (dPFC)	chr3:52720121:52720785:clu_139982_	GNL3	3	2057	5.98677569692417e-20	1.33230262427987e-8	1.02288218493219e-12	0.22686001154154	0.773139975134412	3.40800465397509	rs2710323	rs2710323_ITIH1	0.958101224987355	3.653e-18	5e-8	5e-8	5.33911e-12	rs2710323	ITIH1
30239722	Body mass index	EUR	BrainMeta_cis_sQTL		sQTL	Qi et al. 2022	Dorsolateral Prefrontal Cortex (dPFC)	chr3:52720121:52720785:clu_139982_	GNL3	3	799	1.14394235962287e-13	1.85280856909712e-8	1.04924249289099e-8	0.00070012623694419	0.99929984474243	1427.31380715572	rs353547	rs353547_TWF2	0.998625478158703	2.134e-13	5e-8	5e-8	1.78383e-11	rs353547	TWF2
30239722	Body mass index	EUR	BrainMeta_cis_sQTL		sQTL	Qi et al. 2022	Dorsolateral Prefrontal Cortex (dPFC)	chr3:52720218:52720785:clu_139982_	GNL3	3	799	2.83320765804784e-24	4.58886007909807e-19	3.54368090473037e-7	0.0564523721204938	0.943547273511415	16.7140412009167	rs353547	rs353547_TWF2	0.993435923749858	2.134e-13	5e-8	5e-8	1.60827e-22	rs353547	TWF2
30124842	Body mass index	EUR	BrainMeta_cis_sQTL		sQTL	Qi et al. 2022	Dorsolateral Prefrontal Cortex (dPFC)	ENSG00000163938.17	GNL3	3	265	9.83385371717902e-49	7.74920875261951e-38	1.27379481539584e-14	0.00000377118693191224	0.999996228813052	265167.504785022	rs2710323	rs2710323_ITIH1	0.99999981957153	4.8e-18	5e-8	5e-8	4.89712e-42	rs2710323	ITIH1
30124842	Body mass index	EUR	BrainMeta_cis_sQTL		sQTL	Qi et al. 2022	Dorsolateral Prefrontal Cortex (dPFC)	chr3:52720075:52720785:clu_139982_	GNL3	3	265	2.25241664025641e-16	0.0000177493455213077	1.58094465782357e-13	0.0114695434446849	0.988512707209636	86.1859	rs2710323	rs2710323_ITIH1	0.999796027873583	4.8e-18	5e-8	5e-8	2.71843e-8	rs2710323	ITIH1
30124842	Body mass index	EUR	BrainMeta_cis_sQTL		sQTL	Qi et al. 2022	Dorsolateral Prefrontal Cortex (dPFC)	chr3:52720121:52720785:clu_139982_	GNL3	3	265	6.95737760571035e-20	5.48250695892142e-9	7.57390631557298e-14	0.00497331317810228	0.995026681339312	200.073199837979	rs2710323	rs2710323_ITIH1	0.992181288350633	4.8e-18	5e-8	5e-8	5.33911e-12	rs2710323	ITIH1
30124842	Body mass index	EUR	BrainMeta_cis_sQTL		sQTL	Qi et al. 2022	Dorsolateral Prefrontal Cortex (dPFC)	chr3:52720218:52720785:clu_139982_	GNL3	3	265	2.18903323614318e-37	1.72498757874159e-26	1.287711018561e-14	0.0000147483189887838	0.999985251680998	67803.3376170865	rs2710323	rs2710323_ITIH1	0.999982634225215	4.8e-18	5e-8	5e-8	3.07387e-30	rs2710323	ITIH1
34002096	Bipolar disorder type I	EUR	BrainMeta_cis_sQTL		sQTL	Qi et al. 2022	Dorsolateral Prefrontal Cortex (dPFC)	ENSG00000163938.17	GNL3	3	1371	2.26299775285932e-45	6.13190741503387e-41	0.00000629580204622138	0.169763289627738	0.83023041457021	4.89051794643451	rs3774349	rs7614498_PBRM1	0.188113204774068	4.565e-9	5e-8	5e-8	9.51215e-47	rs7614498	PBRM1
34002096	Bipolar disorder type I	EUR	BrainMeta_cis_sQTL		sQTL	Qi et al. 2022	Dorsolateral Prefrontal Cortex (dPFC)	chr3:52720075:52720785:clu_139982_	GNL3	3	1398	4.15824605076367e-9	0.00011267346929735	0.00000896119863917258	0.242058340305403	0.757820020868414	3.13073294608349	rs3774349	rs7614498_PBRM1	0.138586091809139	4.565e-9	5e-8	5e-8	8.77085e-9	rs7614498	PBRM1
34002096	Bipolar disorder type I	EUR	BrainMeta_cis_sQTL		sQTL	Qi et al. 2022	Dorsolateral Prefrontal Cortex (dPFC)	chr3:52720121:52720785:clu_139982_	GNL3	3	1398	4.26116275896603e-13	1.15462140871922e-8	0.00000733888154171353	0.198055281269667	0.80193736830215	4.04905823849378	rs3774349	rs7614498_PBRM1	0.17975091594858	4.565e-9	5e-8	5e-8	3.95169e-13	rs7614498	PBRM1
34002096	Bipolar disorder type I	EUR	BrainMeta_cis_sQTL		sQTL	Qi et al. 2022	Dorsolateral Prefrontal Cortex (dPFC)	chr3:52720218:52720785:clu_139982_	GNL3	3	1398	1.31659523331268e-33	3.56749819002306e-29	0.0000062306695390349	0.167996673559609	0.831997095770851	4.95246172523552	rs3774349	rs7614498_PBRM1	0.25901769528419	4.565e-9	5e-8	5e-8	1.2515e-34	rs7614498	PBRM1
34002096	Bipolar disorder all type	EUR	BrainMeta_cis_sQTL		sQTL	Qi et al. 2022	Dorsolateral Prefrontal Cortex (dPFC)	ENSG00000163938.17	GNL3	3	1407	3.35959479772634e-49	5.33056060028823e-42	9.34823437160554e-10	0.0138463880565953	0.986153611008583	71.2210005221438	rs3774349	rs2336147_PBRM1	0.182022131243503	4.239e-13	5e-8	5e-8	9.51215e-47	rs2336147	PBRM1
34002096	Bipolar disorder all type	EUR	BrainMeta_cis_sQTL		sQTL	Qi et al. 2022	Dorsolateral Prefrontal Cortex (dPFC)	chr3:52720075:52720785:clu_139982_	GNL3	3	1438	6.10758140476367e-13	0.00000969070223141999	1.45142260981306e-9	0.022051314964632	0.977938992881102	44.3483299952685	rs2336147	rs2336147_PBRM1	0.150682545283204	3.615e-13	5e-8	5e-8	8.25466e-9	rs2336147	PBRM1
34002096	Bipolar disorder all type	EUR	BrainMeta_cis_sQTL		sQTL	Qi et al. 2022	Dorsolateral Prefrontal Cortex (dPFC)	chr3:52720121:52720785:clu_139982_	GNL3	3	1438	6.16221096176278e-17	9.77738118579296e-10	1.06137666194969e-9	0.0158563772085084	0.98414362075238	62.0661080277716	rs35212380	rs2336147_PBRM1	0.17130123698936	4.395e-13	5e-8	5e-8	4.10747e-13	rs2336147	PBRM1
34002096	Bipolar disorder all type	EUR	BrainMeta_cis_sQTL		sQTL	Qi et al. 2022	Dorsolateral Prefrontal Cortex (dPFC)	chr3:52720218:52720785:clu_139982_	GNL3	3	1438	1.94008899819272e-37	3.07827657757875e-30	9.18683183378042e-10	0.0135900395138457	0.986409959567467	72.5833032760866	rs3774349	rs2336147_PBRM1	0.249344109202559	4.239e-13	5e-8	5e-8	1.2515e-34	rs2336147	PBRM1
30124842	Height	EUR	BrainMeta_cis_sQTL		sQTL	Qi et al. 2022	Dorsolateral Prefrontal Cortex (dPFC)	ENSG00000163938.17	GNL3	3	104	3.37541460910996e-65	5.7986693662584e-33	3.8289253409341e-35	0.00558334479081925	0.994416655209174	178.104110074718	rs11720243	rs11720159_PBRM1	0.254049740517325	2.4e-37	5e-8	5e-8	4.56615e-37	rs11720159	PBRM1
30124842	Height	EUR	BrainMeta_cis_sQTL		sQTL	Qi et al. 2022	Dorsolateral Prefrontal Cortex (dPFC)	chr3:52720218:52720785:clu_139982_	GNL3	3	104	4.58203898196067e-53	7.8715453230509e-21	1.25152737224843e-34	0.0205206748037343	0.979479325196265	47.7313409312456	rs2878628	rs11720159_PBRM1	0.256668905486602	5.4e-37	5e-8	5e-8	6.98216e-25	rs11720159	PBRM1
29500382	Nervous	EUR	BrainMeta_cis_sQTL		sQTL	Qi et al. 2022	Dorsolateral Prefrontal Cortex (dPFC)	ENSG00000163938.17	GNL3	3	1632	1.3018180345739e-44	1.21081500787279e-41	0.0000362332443799301	0.0327331444793039	0.967230622276321	29.5489674964735	rs7646741	rs9879090_PBRM1	0.192828446332745	4.305e-9	5e-8	5e-8	1.04786e-46	rs9879090	PBRM1
29500382	Nervous	EUR	BrainMeta_cis_sQTL		sQTL	Qi et al. 2022	Dorsolateral Prefrontal Cortex (dPFC)	chr3:52720075:52720785:clu_139982_	GNL3	3	1815	9.72447724628377e-9	0.00000904471930930812	0.0000231107551911275	0.0205158210416396	0.979452013759381	47.7413022745448	rs9879090	rs9879090_PBRM1	0.244221364791708	1.595e-9	5e-8	5e-8	5.24794e-9	rs9879090	PBRM1
29500382	Nervous	EUR	BrainMeta_cis_sQTL		sQTL	Qi et al. 2022	Dorsolateral Prefrontal Cortex (dPFC)	chr3:52720121:52720785:clu_139982_	GNL3	3	1815	2.44163046315958e-12	2.27095623106875e-9	0.0000420160275263898	0.038117193060053	0.961840788639022	25.2337780256709	rs3774349	rs9879090_PBRM1	0.161108619457929	5.257e-9	5e-8	5e-8	3.95169e-13	rs9879090	PBRM1
29500382	Nervous	EUR	BrainMeta_cis_sQTL		sQTL	Qi et al. 2022	Dorsolateral Prefrontal Cortex (dPFC)	chr3:52720218:52720785:clu_139982_	GNL3	3	1815	7.55738445229869e-33	7.02911008503751e-30	0.0000356682418659775	0.0322072123688233	0.967757119389307	30.0478386116428	rs3774349	rs9879090_PBRM1	0.239379189344669	5.257e-9	5e-8	5e-8	1.2515e-34	rs9879090	PBRM1
35396580	Schizophrenia	EUR	BrainMeta_cis_sQTL		sQTL	Qi et al. 2022	Dorsolateral Prefrontal Cortex (dPFC)	ENSG00000163938.17	GNL3	3	476	1.25905505960241e-34	6.39572443502372e-27	1.05974512002234e-10	0.00438766117846041	0.995612338715564	226.911855364574	rs6445358	rs6445358_WDR82	0.36528170682233	3.45e-14	5e-8	5e-8	8.13723e-31	rs6445358	WDR82
35396580	Schizophrenia	EUR	BrainMeta_cis_sQTL		sQTL	Qi et al. 2022	Dorsolateral Prefrontal Cortex (dPFC)	ENSG00000163938.17	GNL3	3	1645	2.14438314154656e-54	2.08328720116121e-41	5.97683607800424e-15	0.0571226140997535	0.942877385900237	16.5062016288975	rs7646741	rs2710323_ITIH1	0.27274864120689	1.682e-18	5e-8	5e-8	1.04786e-46	rs2710323	ITIH1
35396580	Schizophrenia	EUR	BrainMeta_cis_sQTL		sQTL	Qi et al. 2022	Dorsolateral Prefrontal Cortex (dPFC)	chr3:52720075:52720785:clu_139982_	GNL3	3	1674	2.12236020668845e-18	0.0000206189172502989	5.04374822246394e-15	0.0480485295333506	0.951930851549395	19.8118623149259	rs2710323	rs2710323_ITIH1	0.554114130522724	1.229e-19	5e-8	5e-8	2.71843e-8	rs2710323	ITIH1
35396580	Schizophrenia	EUR	BrainMeta_cis_sQTL		sQTL	Qi et al. 2022	Dorsolateral Prefrontal Cortex (dPFC)	chr3:52720121:52720785:clu_139982_	GNL3	3	1674	2.72059359267338e-22	2.64308075425861e-9	4.64828685245166e-15	0.0442027208979365	0.955797276458981	21.6230416825676	rs2710323	rs2710323_ITIH1	0.228707318746081	1.229e-19	5e-8	5e-8	5.33911e-12	rs2710323	ITIH1
35396580	Schizophrenia	EUR	BrainMeta_cis_sQTL		sQTL	Qi et al. 2022	Dorsolateral Prefrontal Cortex (dPFC)	chr3:52720121:52720785:clu_139982_	GNL3	3	487	1.00299016139397e-14	5.09497073572732e-7	9.19732003835639e-10	0.0457661416330141	0.95423334795017	20.8502030955963	rs6445358	rs6445358_WDR82	0.298008771459396	3.45e-14	5e-8	5e-8	6.43226e-10	rs6445358	WDR82
35396580	Schizophrenia	EUR	BrainMeta_cis_sQTL		sQTL	Qi et al. 2022	Dorsolateral Prefrontal Cortex (dPFC)	chr3:52720218:52720785:clu_139982_	GNL3	3	487	1.03585653054344e-27	5.26192470541873e-20	1.29256637108156e-10	0.00557152609699995	0.99442847377374	178.484037669536	rs6445358	rs6445358_WDR82	0.301767037451035	3.45e-14	5e-8	5e-8	1.71565e-23	rs6445358	WDR82
35396580	Schizophrenia	EUR	BrainMeta_cis_sQTL		sQTL	Qi et al. 2022	Dorsolateral Prefrontal Cortex (dPFC)	chr3:52720218:52720785:clu_139982_	GNL3	3	1674	1.26197704492939e-42	1.22602186844505e-29	5.92532237561615e-15	0.0566216529606305	0.943378347039357	16.6610880769464	rs7646741	rs2710323_ITIH1	0.31278581098265	1.682e-18	5e-8	5e-8	1.65632e-34	rs2710323	ITIH1
29483656	Schizophrenia	EUR	BrainMeta_cis_sQTL		sQTL	Qi et al. 2022	Dorsolateral Prefrontal Cortex (dPFC)	ENSG00000163938.17	GNL3	3	640	3.7803272435563e-45	4.0215047441723e-41	0.00000139865593094241	0.0138927686651233	0.986105832678949	70.9797921817044	rs2336147	rs2577831_PBRM1	0.693629534259657	7.36e-10	5e-8	5e-8	1.54151e-46	rs2577831	PBRM1
29483656	Schizophrenia	EUR	BrainMeta_cis_sQTL		sQTL	Qi et al. 2022	Dorsolateral Prefrontal Cortex (dPFC)	chr3:52720075:52720785:clu_139982_	GNL3	3	669	1.37093863929922e-9	0.0000145840198278225	0.00000101095005827943	0.00976424782124238	0.990220155837934	101.412845512143	rs2577831	rs2577831_PBRM1	0.543860456596451	6.54e-11	5e-8	5e-8	3.09109e-8	rs2577831	PBRM1
29483656	Schizophrenia	EUR	BrainMeta_cis_sQTL		sQTL	Qi et al. 2022	Dorsolateral Prefrontal Cortex (dPFC)	chr3:52720121:52720785:clu_139982_	GNL3	3	669	1.99223818501754e-13	2.11933928763528e-9	5.59796282433627e-7	0.00496006309898585	0.995039374985194	200.61022513779	rs2577831	rs2577831_PBRM1	0.705659232262019	6.54e-11	5e-8	5e-8	2.07685e-12	rs2577831	PBRM1
29483656	Schizophrenia	EUR	BrainMeta_cis_sQTL		sQTL	Qi et al. 2022	Dorsolateral Prefrontal Cortex (dPFC)	chr3:52720121:52720785:clu_139982_	GNL3	3	1795	1.13656348073462e-14	1.85127934928065e-8	1.29685345418827e-7	0.210447044133686	0.789552807668166	3.75178853624859	rs4481150	rs1080500_RFT1	0.325505189166414	1.46e-11	5e-8	5e-8	1.61788e-12	rs1080500	RFT1
29483656	Schizophrenia	EUR	BrainMeta_cis_sQTL		sQTL	Qi et al. 2022	Dorsolateral Prefrontal Cortex (dPFC)	chr3:52720218:52720785:clu_139982_	GNL3	3	669	1.4477714165312e-33	1.54013654875456e-29	9.86528297721083e-7	0.00950417490246796	0.990494838569234	104.216815108488	rs2577831	rs2577831_PBRM1	0.382899608208844	6.54e-11	5e-8	5e-8	4.27591e-33	rs2577831	PBRM1
30239722	Waist-to-hip ratio adjusted for body mass index	EUR	BrainMeta_cis_sQTL		sQTL	Qi et al. 2022	Dorsolateral Prefrontal Cortex (dPFC)	chr3:52720075:52720785:clu_139982_	GNL3	3	1824	3.82934558299019e-37	0.00000421448083994114	9.10064202367145e-34	0.00902496548257771	0.990970820036583	109.803280904465	rs2276824	rs2276824_PBRM1	0.999639248048568	8.897e-38	5e-8	5e-8	5.90829e-9	rs2276824	PBRM1
30239722	Waist-to-hip ratio adjusted for body mass index	EUR	BrainMeta_cis_sQTL		sQTL	Qi et al. 2022	Dorsolateral Prefrontal Cortex (dPFC)	chr3:52720218:52720785:clu_139982_	GNL3	3	608	0.0000403689611240131	0.00031991360127768	0.00016487972345217	0.00030746189177795	0.999167375822369	3249.72753548256	rs76382119	rs76382119_POC1A	0.999579060937747	4.46e-8	5e-8	5e-8	5.20476e-7	rs76382119	POC1A
25673412	Waist-to-hip ratio adjusted for body mass index	EUR	BrainMeta_cis_sQTL		sQTL	Qi et al. 2022	Dorsolateral Prefrontal Cortex (dPFC)	ENSG00000163938.17	GNL3	3	471	3.42504599748747e-46	2.31879644748054e-41	2.02755435815386e-7	0.0127395213387347	0.987260275905835	77.4958689306527	rs1108842	rs2276824_PBRM1	0.970781125402593	5.7e-11	5e-8	5e-8	8.34613e-47	rs2276824	PBRM1
25673412	Waist-to-hip ratio adjusted for body mass index	EUR	BrainMeta_cis_sQTL		sQTL	Qi et al. 2022	Dorsolateral Prefrontal Cortex (dPFC)	chr3:52720075:52720785:clu_139982_	GNL3	3	479	1.58926174876334e-10	0.0000107593752978148	1.81159225626424e-7	0.0112758498727199	0.988713209433832	87.6841	rs2276824	rs2276824_PBRM1	0.406352113774619	3.2e-11	5e-8	5e-8	5.90829e-9	rs2276824	PBRM1
25673412	Waist-to-hip ratio adjusted for body mass index	EUR	BrainMeta_cis_sQTL		sQTL	Qi et al. 2022	Dorsolateral Prefrontal Cortex (dPFC)	chr3:52720121:52720785:clu_139982_	GNL3	3	479	6.91395272501397e-14	4.6807778654246e-9	3.15227706786213e-7	0.020361422799652	0.979638257291793	48.1124657609162	rs1108842	rs2276824_PBRM1	0.585308621521002	5.7e-11	5e-8	5e-8	5.8715e-13	rs2276824	PBRM1
25673412	Waist-to-hip ratio adjusted for body mass index	EUR	BrainMeta_cis_sQTL		sQTL	Qi et al. 2022	Dorsolateral Prefrontal Cortex (dPFC)	chr3:52720218:52720785:clu_139982_	GNL3	3	479	2.16344935038095e-34	1.46466518285456e-29	2.41231910360798e-7	0.0153468586296666	0.984652900138426	64.1598990320417	rs1108842	rs2276824_PBRM1	0.895918952687195	5.7e-11	5e-8	5e-8	1.82505e-34	rs2276824	PBRM1
30867560	Neuroticism	EUR	BrainMeta_cis_sQTL		sQTL	Qi et al. 2022	Dorsolateral Prefrontal Cortex (dPFC)	chr3:52720121:52720785:clu_139982_	GNL3	3	2138	6.42365195262073e-11	4.61174382066731e-9	0.00109707107699266	0.0778411563203306	0.921061767926697	11.8325807511949	rs2071044	rs2071044_ITIH4_AC006254.1	0.429645710912056	4.307e-8	5e-8	5e-8	1.16832e-12	rs2071044	ITIH4_AC006254.1
29500382	Worry	EUR	BrainMeta_cis_sQTL		sQTL	Qi et al. 2022	Dorsolateral Prefrontal Cortex (dPFC)	ENSG00000163938.17	GNL3	3	812	1.74838727704012e-28	3.76419286570755e-26	0.00022417941462513	0.0473122752944368	0.952463545290938	20.1314254992707	rs9311474	rs353547_TWF2	0.20330559751891	2.014e-8	5e-8	5e-8	1.15583e-30	rs353547	TWF2
29500382	Worry	EUR	BrainMeta_cis_sQTL		sQTL	Qi et al. 2022	Dorsolateral Prefrontal Cortex (dPFC)	chr3:52720121:52720785:clu_139982_	GNL3	3	917	1.905595803105e-10	4.1026917902968e-8	0.0000195882115151732	0.00322052455600514	0.996759846015003	309.502327549839	rs353547	rs353547_TWF2	0.944074062168153	1.799e-9	5e-8	5e-8	1.78383e-11	rs353547	TWF2
29500382	Worry	EUR	BrainMeta_cis_sQTL		sQTL	Qi et al. 2022	Dorsolateral Prefrontal Cortex (dPFC)	chr3:52720218:52720785:clu_139982_	GNL3	3	917	9.82365457733903e-22	2.11500397510792e-19	0.00017503320936302	0.036721031909294	0.963103934881341	26.2275836163956	rs353547	rs353547_TWF2	0.189836846426422	1.799e-9	5e-8	5e-8	1.60827e-22	rs353547	TWF2
29942085	Worry subcluster	EUR	BrainMeta_cis_sQTL		sQTL	Qi et al. 2022	Dorsolateral Prefrontal Cortex (dPFC)	ENSG00000163938.17	GNL3	3	1415	5.65515873688409e-46	6.4316762986326e-41	0.00000124005535261179	0.140173078813079	0.859825681131567	6.13402864809828	rs1108842	rs353547_TWF2	0.243574858287075	2.644e-10	5e-8	5e-8	8.34613e-47	rs353547	TWF2
29942085	Worry subcluster	EUR	BrainMeta_cis_sQTL		sQTL	Qi et al. 2022	Dorsolateral Prefrontal Cortex (dPFC)	ENSG00000163938.17	GNL3	3	1281	1.20995851141857e-45	3.3851256012602e-40	7.15569707151561e-7	0.199395792690896	0.800603491739394	4.01514736562417	rs7646741	rs9836178_STIMATE-MUSTN1_STIMATE	0.764658183134236	1.533e-10	5e-8	5e-8	1.04786e-46	rs9836178	STIMATE-MUSTN1_STIMATE
29942085	Worry subcluster	EUR	BrainMeta_cis_sQTL		sQTL	Qi et al. 2022	Dorsolateral Prefrontal Cortex (dPFC)	chr3:52720075:52720785:clu_139982_	GNL3	3	1563	9.22516045113252e-10	0.00010491872173637	0.0000019163216283635	0.217162547135948	0.78273061689817	3.60435363842074	rs1108842	rs353547_TWF2	0.165395536331713	2.644e-10	5e-8	5e-8	7.40018e-9	rs353547	TWF2
29942085	Worry subcluster	EUR	BrainMeta_cis_sQTL		sQTL	Qi et al. 2022	Dorsolateral Prefrontal Cortex (dPFC)	chr3:52720075:52720785:clu_139982_	GNL3	3	1431	1.65082436336572e-9	0.00046185391066039	4.94420872198212e-7	0.137462884815176	0.862074765202468	6.27132746676719	rs2710323	rs9836178_STIMATE-MUSTN1_STIMATE	0.552691983011882	3.639e-11	5e-8	5e-8	2.71843e-8	rs9836178	STIMATE-MUSTN1_STIMATE
29942085	Worry subcluster	EUR	BrainMeta_cis_sQTL		sQTL	Qi et al. 2022	Dorsolateral Prefrontal Cortex (dPFC)	chr3:52720121:52720785:clu_139982_	GNL3	3	1563	8.26814982500976e-14	9.40345390587053e-9	9.96827261024006e-7	0.112482698317748	0.887516295451455	7.89024720001242	rs353547	rs353547_TWF2	0.203724512369801	4.807e-12	5e-8	5e-8	1.78383e-11	rs353547	TWF2
29942085	Worry subcluster	EUR	BrainMeta_cis_sQTL		sQTL	Qi et al. 2022	Dorsolateral Prefrontal Cortex (dPFC)	chr3:52720121:52720785:clu_139982_	GNL3	3	1431	1.74513039316349e-13	4.88238067344485e-8	8.93468930819228e-7	0.249216524049523	0.750782533657566	3.01257124310254	rs7646741	rs9836178_STIMATE-MUSTN1_STIMATE	0.433415093419032	1.533e-10	5e-8	5e-8	5.82312e-13	rs9836178	STIMATE-MUSTN1_STIMATE
29942085	Worry subcluster	EUR	BrainMeta_cis_sQTL		sQTL	Qi et al. 2022	Dorsolateral Prefrontal Cortex (dPFC)	chr3:52720218:52720785:clu_139982_	GNL3	3	1563	3.43574261247585e-34	3.90750627076521e-29	0.00000122989329028798	0.139016076977218	0.860982693129495	6.19340375480883	rs3774349	rs353547_TWF2	0.31448786209533	2.55e-10	5e-8	5e-8	1.2515e-34	rs353547	TWF2
29942085	Worry subcluster	EUR	BrainMeta_cis_sQTL		sQTL	Qi et al. 2022	Dorsolateral Prefrontal Cortex (dPFC)	chr3:52720218:52720785:clu_139982_	GNL3	3	1431	6.48114922149424e-34	1.81324202619462e-28	7.0543619570487e-7	0.196557630135738	0.80344166442806	4.08756283779584	rs7646741	rs9836178_STIMATE-MUSTN1_STIMATE	0.804348519729405	1.533e-10	5e-8	5e-8	1.65632e-34	rs9836178	STIMATE-MUSTN1_STIMATE
34002096	Bipolar disorder type I	EUR	Nerve_Tibial_sQTL	EUR	sQTL	GTEx v8	Nerve Tibial	chr3:52686105:52686769:clu_46511:ENSG00000163938.16	GNL3	3	1352	2.35772876732896e-9	0.0000624980684840785	0.00000575477820949705	0.151697948628067	0.848233796167512	5.59159701128992	rs3774349	rs7614498_PBRM1	0.0965911561346209	4.565e-9	5e-8	5e-8	1.76229e-9	rs7614498	PBRM1
34002096	Bipolar disorder type I	EUR	Nerve_Tibial_sQTL	EUR	sQTL	GTEx v8	Nerve Tibial	chr3:52686202:52686769:clu_46511:ENSG00000163938.16	GNL3	3	1352	2.14864774923386e-9	0.0000569558025675321	0.00000607237604589795	0.160125172486205	0.839811797186533	5.24472064040325	rs3774349	rs7614498_PBRM1	0.127041779343303	4.565e-9	5e-8	5e-8	1.15386e-9	rs7614498	PBRM1
34002096	Bipolar disorder all type	EUR	Nerve_Tibial_sQTL	EUR	sQTL	GTEx v8	Nerve Tibial	chr3:52686105:52686769:clu_46511:ENSG00000163938.16	GNL3	3	1391	6.01208362340333e-13	0.00000940166953495626	1.47550105477361e-9	0.0220959249627195	0.977894671891644	44.256788233195	rs2336147	rs2336147_PBRM1	0.19250539266316	3.615e-13	5e-8	5e-8	1.76229e-9	rs2336147	PBRM1
34002096	Bipolar disorder all type	EUR	Nerve_Tibial_sQTL	EUR	sQTL	GTEx v8	Nerve Tibial	chr3:52686202:52686769:clu_46511:ENSG00000163938.16	GNL3	3	1391	4.19782849144413e-13	0.00000656454545764291	1.19116415366885e-9	0.0176450234558886	0.982348410807071	55.6728311108725	rs13083798	rs2336147_PBRM1	0.197651764073477	5.102e-13	5e-8	5e-8	8.50815e-10	rs2336147	PBRM1
30643256	Neuroticism	EUR	Nerve_Tibial_sQTL	EUR	sQTL	GTEx v8	Nerve Tibial	chr3:52686105:52686769:clu_46511:ENSG00000163938.16	GNL3	3	559	0.0000158566663461762	0.00277166002079519	0.00059550493669124	0.103197641746415	0.893419336629752	8.65736194655616	rs352139	rs352163_ALAS1	0.326168432315937	1.318e-8	5e-8	5e-8	7.04794e-7	rs352163	ALAS1
30643256	Neuroticism	EUR	Nerve_Tibial_sQTL	EUR	sQTL	GTEx v8	Nerve Tibial	chr3:52686202:52686769:clu_46511:ENSG00000163938.16	GNL3	3	559	0.0000117864449883939	0.0020602072118085	0.0005833159013787	0.101064202759501	0.896280487682324	8.86842683373432	rs352139	rs352163_ALAS1	0.31957101384684	1.318e-8	5e-8	5e-8	5.02361e-7	rs352163	ALAS1
29483656	Schizophrenia	EUR	Nerve_Tibial_sQTL	EUR	sQTL	GTEx v8	Nerve Tibial	chr3:52686105:52686769:clu_46511:ENSG00000163938.16	GNL3	3	758	2.54118396373983e-9	0.0000278886266554701	0.00000277718744616923	0.0295082232149541	0.97046110842976	32.8878191465609	rs13083798	rs2577831_PBRM1	0.476622656221002	8.25e-10	5e-8	5e-8	1.37847e-9	rs2577831	PBRM1
29483656	Schizophrenia	EUR	Nerve_Tibial_sQTL	EUR	sQTL	GTEx v8	Nerve Tibial	chr3:52686202:52686769:clu_46511:ENSG00000163938.16	GNL3	3	758	1.71167359258428e-9	0.0000187850334571438	0.0000020748653226123	0.0217927523450327	0.978186386044514	44.885857947515	rs13083798	rs2577831_PBRM1	0.479012419128578	8.25e-10	5e-8	5e-8	8.50815e-10	rs2577831	PBRM1
30643256	Well being spectrum	EUR	Nerve_Tibial_sQTL	EUR	sQTL	GTEx v8	Nerve Tibial	chr3:52686105:52686769:clu_46511:ENSG00000163938.16	GNL3	3	392	0.00000118576747327309	0.00387079310657491	0.00000603101275268346	0.0187100927060996	0.977411897407099	52.2398211895794	rs352139	rs352163_ALAS1	0.243710351907401	5.715e-10	5e-8	5e-8	7.04794e-7	rs352163	ALAS1
30643256	Well being spectrum	EUR	Nerve_Tibial_sQTL	EUR	sQTL	GTEx v8	Nerve Tibial	chr3:52686202:52686769:clu_46511:ENSG00000163938.16	GNL3	3	392	8.84029879523262e-7	0.00288580758099173	0.00000584777568883413	0.0181103524779637	0.978997108135476	54.0573193882726	rs352139	rs352163_ALAS1	0.239902627833056	5.715e-10	5e-8	5e-8	5.02361e-7	rs352163	ALAS1
35396580	Schizophrenia	EUR	Nerve_Tibial_sQTL	EUR	sQTL	GTEx v8	Nerve Tibial	chr3:52686105:52686769:clu_46511:ENSG00000163938.16	GNL3	3	1628	3.85918341325143e-18	0.0000365333690709417	9.37151616943757e-15	0.0878042925490313	0.912159174081889	10.3885487554327	rs13083798	rs2710323_ITIH1	0.206279344092861	2.959e-18	5e-8	5e-8	1.37847e-9	rs2710323	ITIH1
35396580	Schizophrenia	EUR	Nerve_Tibial_sQTL	EUR	sQTL	GTEx v8	Nerve Tibial	chr3:52686105:52686769:clu_46511:ENSG00000163938.16	GNL3	3	469	3.14225748146368e-10	0.0159619810125379	1.54447491744736e-9	0.0775494605566504	0.90648855657211	11.6891665018084	rs6445358	rs6445358_WDR82	0.272265815752001	3.45e-14	5e-8	5e-8	3.88276E-05	rs6445358	WDR82
35396580	Schizophrenia	EUR	Nerve_Tibial_sQTL	EUR	sQTL	GTEx v8	Nerve Tibial	chr3:52686202:52686769:clu_46511:ENSG00000163938.16	GNL3	3	1628	2.72062706935368e-18	0.000025755104690749	7.63256420412422e-15	0.0713258301024633	0.928648414792835	13.0198052158493	rs13083798	rs2710323_ITIH1	0.2145461284954	2.959e-18	5e-8	5e-8	8.50815e-10	rs2710323	ITIH1
35396580	Schizophrenia	EUR	Nerve_Tibial_sQTL	EUR	sQTL	GTEx v8	Nerve Tibial	chr3:52686202:52686769:clu_46511:ENSG00000163938.16	GNL3	3	469	3.23877174272841e-10	0.0164522523588023	2.09959903310967e-9	0.105777270043111	0.877770475174611	8.2982901224135	rs6445358	rs6445358_WDR82	0.269196241115778	3.45e-14	5e-8	5e-8	4.25126E-05	rs6445358	WDR82
30643258	Automobile speeding propensity	EUR	Nerve_Tibial_sQTL	EUR	sQTL	GTEx v8	Nerve Tibial	chr3:52686105:52686769:clu_46511:ENSG00000163938.16	GNL3	3	1732	2.16523163360003e-7	0.0000102203076649924	0.00053078481257885	0.0240786788024104	0.975380099554183	40.5080406428506	rs13083798	rs13083798_PBRM1	0.299319254309195	4.516e-8	5e-8	5e-8	1.37847e-9	rs13083798	PBRM1
30643258	Automobile speeding propensity	EUR	Nerve_Tibial_sQTL	EUR	sQTL	GTEx v8	Nerve Tibial	chr3:52686202:52686769:clu_46511:ENSG00000163938.16	GNL3	3	1732	1.50474959503273e-7	0.00000710270604833036	0.00042645969455765	0.0191492966968379	0.980416990427597	51.1985900030205	rs13083798	rs13083798_PBRM1	0.310945216666021	4.516e-8	5e-8	5e-8	8.50815e-10	rs13083798	PBRM1
30124842	Body mass index	EUR	Nerve_Tibial_sQTL	EUR	sQTL	GTEx v8	Nerve Tibial	chr3:52686105:52686769:clu_46511:ENSG00000163938.16	GNL3	3	265	3.72444818628103e-15	0.00029349151730198	8.0465915556574e-13	0.0624709862239381	0.937235522257952	15.0027329310645	rs2710323	rs2710323_ITIH1	0.999863162326294	4.8e-18	5e-8	5e-8	2.56221e-7	rs2710323	ITIH1
30124842	Body mass index	EUR	Nerve_Tibial_sQTL	EUR	sQTL	GTEx v8	Nerve Tibial	chr3:52686202:52686769:clu_46511:ENSG00000163938.16	GNL3	3	265	2.51520032769165e-15	0.00019820116258075	4.27150280961393e-13	0.0326929067142454	0.967108892122741	29.581612322692	rs2710323	rs2710323_ITIH1	0.999823986460594	4.8e-18	5e-8	5e-8	1.53502e-7	rs2710323	ITIH1
30124842	Height	EUR	Nerve_Tibial_sQTL	EUR	sQTL	GTEx v8	Nerve Tibial	chr3:52686105:52686769:clu_46511:ENSG00000163938.16	GNL3	3	103	5.71800371270928e-37	0.0000982363017268698	5.39216323652049e-35	0.00827220098510537	0.991629562713168	119.874935884496	rs11720159	rs11720159_PBRM1	0.212326454629122	2.2e-37	5e-8	5e-8	6.65443e-8	rs11720159	PBRM1
30124842	Height	EUR	Nerve_Tibial_sQTL	EUR	sQTL	GTEx v8	Nerve Tibial	chr3:52686202:52686769:clu_46511:ENSG00000163938.16	GNL3	3	103	9.03475096898201e-37	0.00015521859844954	6.87256292506233e-35	0.0108181564246374	0.989026624976914	91.4228437966097	rs11720159	rs11720159_PBRM1	0.207639743385086	2.2e-37	5e-8	5e-8	1.18725e-7	rs11720159	PBRM1
29500382	Nervous	EUR	Nerve_Tibial_sQTL	EUR	sQTL	GTEx v8	Nerve Tibial	chr3:52686105:52686769:clu_46511:ENSG00000163938.16	GNL3	3	2056	2.70470517297768e-8	0.0000249141591482778	0.0000665797468680801	0.0603898427334955	0.939518636313437	15.5575605728863	rs3774349	rs9879090_PBRM1	0.188282321540077	5.257e-9	5e-8	5e-8	1.76229e-9	rs9879090	PBRM1
29500382	Nervous	EUR	Nerve_Tibial_sQTL	EUR	sQTL	GTEx v8	Nerve Tibial	chr3:52686202:52686769:clu_46511:ENSG00000163938.16	GNL3	3	2056	1.91240117100755e-8	0.0000176159189570301	0.0000544382604507662	0.049194602225452	0.950733324471129	19.3259683270545	rs3774349	rs9879090_PBRM1	0.187990745885619	5.257e-9	5e-8	5e-8	1.15386e-9	rs9879090	PBRM1
25673412	Waist-to-hip ratio adjusted for body mass index	EUR	Nerve_Tibial_sQTL	EUR	sQTL	GTEx v8	Nerve Tibial	chr3:52686105:52686769:clu_46511:ENSG00000163938.16	GNL3	3	478	1.4692532577775e-10	0.00000996645083993702	1.27015241499889e-7	0.00762351486400849	0.992366391522986	130.171765809504	rs13083798	rs2276824_PBRM1	0.802692207106296	4.1e-11	5e-8	5e-8	1.37847e-9	rs2276824	PBRM1
25673412	Waist-to-hip ratio adjusted for body mass index	EUR	Nerve_Tibial_sQTL	EUR	sQTL	GTEx v8	Nerve Tibial	chr3:52686202:52686769:clu_46511:ENSG00000163938.16	GNL3	3	478	9.89054622034311e-11	0.00000670909811929116	1.00690516335468e-7	0.00583602732578355	0.994157162786674	170.348270713965	rs13083798	rs2276824_PBRM1	0.81034714401961	4.1e-11	5e-8	5e-8	8.50815e-10	rs2276824	PBRM1
29942085	Worry subcluster	EUR	Nerve_Tibial_sQTL	EUR	sQTL	GTEx v8	Nerve Tibial	chr3:52686105:52686769:clu_46511:ENSG00000163938.16	GNL3	3	1671	8.80315603584421e-10	0.00010113348003022	0.00000191433463253397	0.219144149747308	0.780752801557713	3.56273622845049	rs3774349	rs353547_TWF2	0.19510582617807	2.55e-10	5e-8	5e-8	1.76229e-9	rs353547	TWF2
29942085	Worry subcluster	EUR	Nerve_Tibial_sQTL	EUR	sQTL	GTEx v8	Nerve Tibial	chr3:52686202:52686769:clu_46511:ENSG00000163938.16	GNL3	3	1671	6.42962871835995e-10	0.0000738656369309357	0.00000162555339041588	0.185934797517828	0.813989710648888	4.37782341721614	rs3774349	rs353547_TWF2	0.195505203210651	2.55e-10	5e-8	5e-8	1.15386e-9	rs353547	TWF2
29942085	Worry subcluster	EUR	Nerve_Tibial_sQTL	EUR	sQTL	GTEx v8	Nerve Tibial	chr3:52686202:52686769:clu_46511:ENSG00000163938.16	GNL3	3	1685	2.32193152486266e-9	0.00063435265286517	7.97715610442922e-7	0.217154023857873	0.782210823451719	3.60210144649989	rs7646741	rs9836178_STIMATE-MUSTN1_STIMATE	0.836899953253016	1.533e-10	5e-8	5e-8	1.71406e-9	rs9836178	STIMATE-MUSTN1_STIMATE
34002096	Bipolar disorder type I	EUR	Pituitary_sQTL	EUR	sQTL	GTEx v8	Pituitary	chr3:52686202:52686769:clu_42737:ENSG00000163938.16	GNL3	3	1348	1.03908757916718e-8	0.00027543866472445	0.00000704781614485626	0.186007989357714	0.81370951377054	4.37459442780001	rs7646741	rs7614498_PBRM1	0.107787050318771	5.396e-9	5e-8	5e-8	9.14016e-10	rs7614498	PBRM1
34002096	Bipolar disorder all type	EUR	Pituitary_sQTL	EUR	sQTL	GTEx v8	Pituitary	chr3:52686202:52686769:clu_42737:ENSG00000163938.16	GNL3	3	1388	2.41683639858731e-12	0.0000377943797238148	1.63282879240894e-9	0.0245587002694455	0.975403503715586	39.7172282333331	rs2577831	rs2336147_PBRM1	0.132382763980705	3.834e-13	5e-8	5e-8	1.62446e-9	rs2336147	PBRM1
29483656	Schizophrenia	EUR	Pituitary_sQTL	EUR	sQTL	GTEx v8	Pituitary	chr3:52686202:52686769:clu_42737:ENSG00000163938.16	GNL3	3	759	2.94199504793387e-9	0.0000322873915943144	8.85263134389571e-7	0.00872421816726859	0.991242606236006	113.619649031123	rs2577831	rs2577831_PBRM1	0.839621791195076	6.54e-11	5e-8	5e-8	1.62446e-9	rs2577831	PBRM1
35396580	Schizophrenia	EUR	Pituitary_sQTL	EUR	sQTL	GTEx v8	Pituitary	chr3:52686202:52686769:clu_42737:ENSG00000163938.16	GNL3	3	1623	1.19700735283148e-17	0.00011331597055341	7.76142596587089e-15	0.072547022389749	0.927339661639689	12.782601285242	rs2710323	rs2710323_ITIH1	0.242097894073961	1.229e-19	5e-8	5e-8	2.65113e-8	rs2710323	ITIH1
35396580	Schizophrenia	EUR	Pituitary_sQTL	EUR	sQTL	GTEx v8	Pituitary	chr3:52686202:52686769:clu_42737:ENSG00000163938.16	GNL3	3	469	1.48392821030345e-11	0.00075380308763875	1.13959396977319e-10	0.0047944364561306	0.994451760327432	207.417862229842	rs6445358	rs6445358_WDR82	0.330900976121536	3.45e-14	5e-8	5e-8	1.22769e-7	rs6445358	WDR82
30643258	Automobile speeding propensity	EUR	Pituitary_sQTL	EUR	sQTL	GTEx v8	Pituitary	chr3:52686202:52686769:clu_42737:ENSG00000163938.16	GNL3	3	1723	0.00000102555534264316	0.0000484078971775244	0.00068506172583061	0.0313681416640454	0.967897363157604	30.8560632479871	rs7646741	rs13083798_PBRM1	0.127546562394674	1.086e-7	5e-8	5e-8	9.14016e-10	rs13083798	PBRM1
30124842	Body mass index	EUR	Pituitary_sQTL	EUR	sQTL	GTEx v8	Pituitary	chr3:52686202:52686769:clu_42737:ENSG00000163938.16	GNL3	3	265	2.97721384862816e-15	0.00023460844830247	2.01971939249756e-13	0.0149308254022675	0.984834566149222	65.9598206807545	rs2710323	rs2710323_ITIH1	0.99915086763786	4.8e-18	5e-8	5e-8	2.65113e-8	rs2710323	ITIH1
30124842	Height	EUR	Pituitary_sQTL	EUR	sQTL	GTEx v8	Pituitary	chr3:52686202:52686769:clu_42737:ENSG00000163938.16	GNL3	3	103	2.71140320817524e-36	0.00046582380327854	6.27202972311685e-35	0.00978570805964579	0.989748468137071	101.142243576485	rs11720159	rs11720159_PBRM1	0.222494137742356	2.2e-37	5e-8	5e-8	6.5549e-8	rs11720159	PBRM1
29500382	Nervous	EUR	Pituitary_sQTL	EUR	sQTL	GTEx v8	Pituitary	chr3:52686202:52686769:clu_42737:ENSG00000163938.16	GNL3	3	1954	9.48289456713718e-8	0.0000873506573967209	0.0000637662988516938	0.057795583125426	0.942053205089381	16.2997439275761	rs7646741	rs9879090_PBRM1	0.210582898053197	4.305e-9	5e-8	5e-8	9.14016e-10	rs9879090	PBRM1
25673412	Waist-to-hip ratio adjusted for body mass index	EUR	Pituitary_sQTL	EUR	sQTL	GTEx v8	Pituitary	chr3:52686202:52686769:clu_42737:ENSG00000163938.16	GNL3	3	478	1.16407196275411e-9	0.0000789630101517514	2.39091599356958e-7	0.0152337195086995	0.984687077225477	64.6386508996146	rs13083798	rs2276824_PBRM1	0.57310085818167	4.1e-11	5e-8	5e-8	3.35585e-9	rs2276824	PBRM1
29500382	Worry	EUR	Pituitary_sQTL	EUR	sQTL	GTEx v8	Pituitary	chr3:52686202:52686769:clu_42737:ENSG00000163938.16	GNL3	3	934	0.0000190296690070746	0.00409709507324998	0.00021903804986134	0.0462095212593958	0.949455315948486	20.5467464295669	rs9311474	rs353547_TWF2	0.192762524690971	2.014e-8	5e-8	5e-8	1.54636e-7	rs353547	TWF2
29942085	Worry subcluster	EUR	Pituitary_sQTL	EUR	sQTL	GTEx v8	Pituitary	chr3:52686202:52686769:clu_42737:ENSG00000163938.16	GNL3	3	1610	2.34860169413519e-9	0.0002698149292735	0.00000129069615670142	0.147427030945161	0.852301861080809	5.78117768238744	rs2577831	rs353547_TWF2	0.154864588950594	1.23e-10	5e-8	5e-8	1.62446e-9	rs353547	TWF2
29942085	Worry subcluster	EUR	Pituitary_sQTL	EUR	sQTL	GTEx v8	Pituitary	chr3:52686202:52686769:clu_42737:ENSG00000163938.16	GNL3	3	1563	6.33493138560419e-9	0.00173070564295177	8.11416248953067e-7	0.220901858517179	0.777366618088689	3.51906	rs7646741	rs9836178_STIMATE-MUSTN1_STIMATE	0.582395575277859	1.533e-10	5e-8	5e-8	9.14016e-10	rs9836178	STIMATE-MUSTN1_STIMATE
31768069	Impedance of leg (left)	EUR	Thyroid_sQTL	EUR	sQTL	GTEx v8	Thyroid_sQTL	chr3:52686827:52687246:clu_48066:ENSG00000163938.16	GNL3	3	1765	3.29853695925239e-20	0.0000769105994524236	6.51565088809681e-18	0.0142065526971032	0.985716536703442	69.3846394491209	rs2577831	rs772585020_GNL3	0.528804404827593	1.11295e-22	5e-8	5e-8	4.23046e-8	rs772585020	GNL3
31768069	Impedance of leg (left)	EUR	Thyroid_sQTL	EUR	sQTL	GTEx v8	Thyroid_sQTL	chr3:52686105:52686769:clu_48066:ENSG00000163938.16	GNL3	3	1765	3.54707663970705e-21	0.00000827056946863462	1.07298144537483e-17	0.0240423078192626	0.975949421611265	40.5930008445088	rs2577831	rs772585020_GNL3	0.625841753540586	1.11295e-22	5e-8	5e-8	2.46139e-9	rs772585020	GNL3
31768069	Impedance of leg (left)	EUR	Lung_sQTL	EUR	sQTL	GTEx v8	Lung_sQTL	chr3:52686105:52686769:clu_47534:ENSG00000163938.16	GNL3	3	1764	3.68322284750645e-18	0.0085880157242454	1.67500703637879e-16	0.389952883175024	0.601459101100728	1.54238916302812	rs2577831	rs772585020_GNL3	0.354405590710043	1.11295e-22	5e-8	5e-8	3.3548e-05	rs772585020	GNL3
31768069	Age when periods started (menarche)	EUR	Brain_Cerebellum_sQTL	EUR	sQTL	GTEx v8	Brain_Cerebellum_sQTL	chr3:52686105:52686769:clu_38249:ENSG00000163938.16	GNL3	3	1599	6.46300592766935e-13	0.00000158408524892882	3.32154470041405e-8	0.080491682186963	0.919506700511694	11.4236238519143	rs2590838	rs11709284_NT5DC2	0.171796359626916	6.29059e-12	5e-8	5e-8	5.55563e-13	rs11709284	NT5DC2
31768069	Age when periods started (menarche)	EUR	Brain_Cerebellum_sQTL	EUR	sQTL	GTEx v8	Brain_Cerebellum_sQTL	chr3:52686202:52686769:clu_38249:ENSG00000163938.16	GNL3	3	1599	7.92238721310008e-17	1.94178016561091e-10	3.56296521016493e-8	0.0864148297708887	0.91358513440528	10.5720874163319	rs2590838	rs11709284_NT5DC2	0.182141697538239	6.29059e-12	5e-8	5e-8	2.40661e-18	rs11709284	NT5DC2
31768069	Age when periods started (menarche)	EUR	Lung_sQTL	EUR	sQTL	GTEx v8	Lung_sQTL	chr3:52686105:52686769:clu_47534:ENSG00000163938.16	GNL3	3	1618	1.80594973196991e-9	0.00442639041997333	8.25484783038217e-8	0.201532628045508	0.794040897180091	3.94001162432511	rs11709284	rs11709284_NT5DC2	0.374740968761929	4.36759e-13	5e-8	5e-8	3.6108E-06	rs11709284	NT5DC2
32242144	25 hydroxyvitamin D conditioned on BMI with mtCOJO	EUR	Brain_Cerebellum_sQTL	EUR	sQTL	GTEx v8	Brain_Cerebellum_sQTL	chr3:52686202:52686769:clu_38249:ENSG00000163938.16	GNL3	3	1814	3.08278604671081e-15	3.1284845842696e-11	0.00000123485376752361	0.0115431340316074	0.988455631083336	85.631478277628	rs11130324	rs11130324_NEK4	0.246795652193632	1.20469e-10	5e-8	5e-8	2.40661e-18	rs11130324	NEK4
32242144	25 hydroxyvitamin D conditioned on BMI with mtCOJO	EUR	Brain_Cerebellum_sQTL	EUR	sQTL	GTEx v8	Brain_Cerebellum_sQTL	chr3:52686105:52686769:clu_38249:ENSG00000163938.16	GNL3	3	1814	2.80335180826724e-11	2.84490807456645e-7	0.00000129567246738065	0.0121609548256394	0.987837464983052	81.2302552839322	rs11130324	rs11130324_NEK4	0.263595214261459	1.20469e-10	5e-8	5e-8	5.55563e-13	rs11130324	NEK4
32242144	25 hydroxyvitamin D conditioned on BMI with mtCOJO	EUR	Lung_sQTL	EUR	sQTL	GTEx v8	Lung_sQTL	chr3:52686105:52686769:clu_47534:ENSG00000163938.16	GNL3	3	1839	4.05124636367934e-7	0.00411130150467556	0.0000181159262231046	0.183031904933871	0.812838272510594	4.4409649388956	rs1010554	rs11130324_NEK4	0.195618355207811	1.02162e-8	5e-8	5e-8	2.46541e-8	rs11130324	NEK4
32888493	red blood cell count	EUR	Brain_Cerebellum_sQTL	EUR	sQTL	GTEx v8	Brain_Cerebellum_sQTL	chr3:52686105:52686769:clu_38249:ENSG00000163938.16	GNL3	3	2051	2.7385488140311e-20	3.33645804141026e-7	1.33122307715624e-15	0.01523393344796	0.984765732906233	64.6429063294948	rs2590838	rs13083798_PBRM1	0.146245693547065	1.55e-19	5e-8	5e-8	5.55563e-13	rs13083798	PBRM1
32888493	red blood cell count	EUR	Brain_Cerebellum_sQTL	EUR	sQTL	GTEx v8	Brain_Cerebellum_sQTL	chr3:52686202:52686769:clu_38249:ENSG00000163938.16	GNL3	3	2051	3.25284209089654e-24	3.96303731962117e-11	1.3809252653793e-15	0.0158400762653957	0.984159923694973	62.1310091697584	rs2590838	rs13083798_PBRM1	0.149232074288493	1.55e-19	5e-8	5e-8	2.40661e-18	rs13083798	PBRM1
32888493	red blood cell count	EUR	Thyroid_sQTL	EUR	sQTL	GTEx v8	Thyroid_sQTL	chr3:52686827:52687246:clu_48066:ENSG00000163938.16	GNL3	3	2147	1.41844222343083e-17	0.000172813439873692	2.77835067804989e-15	0.0328826074095009	0.966944579150626	29.4059582048607	rs2577831	rs13083798_PBRM1	0.32784936375716	8.15e-20	5e-8	5e-8	4.23046e-8	rs13083798	PBRM1
32888493	red blood cell count	EUR	Thyroid_sQTL	EUR	sQTL	GTEx v8	Thyroid_sQTL	chr3:52686105:52686769:clu_48066:ENSG00000163938.16	GNL3	3	2147	1.26742635076722e-18	0.0000154414683830318	3.79743076520317e-15	0.0453106629914051	0.954673895540207	21.0695194577334	rs2577831	rs13083798_PBRM1	0.322588855479197	8.15e-20	5e-8	5e-8	2.46139e-9	rs13083798	PBRM1
31768069	Interval between previous point and current one in alphanumeric path (trail #2)	EUR	Thyroid_sQTL	EUR	sQTL	GTEx v8	Thyroid_sQTL	chr3:52686105:52686769:clu_48066:ENSG00000163938.16	GNL3	3	1614	1.16902423327727e-7	0.00000810769938762027	0.000357965957372127	0.0238507371208378	0.975783072319979	40.9120719152726	rs7639267	rs7639267_NT5DC2	0.369788698041893	3.49802e-8	5e-8	5e-8	1.55513e-9	rs7639267	NT5DC2
31768069	Interval between previous point and current one in alphanumeric path (trail #2)	EUR	Pituitary_sQTL	EUR	sQTL	GTEx v8	Pituitary_sQTL	chr3:52686202:52686769:clu_42737:ENSG00000163938.16	GNL3	3	1611	0.00000279713743615875	0.00019399387928678	0.00198095022561632	0.136526382674698	0.861295876082964	6.30864056608883	rs7639267	rs7639267_NT5DC2	0.38114737485958	3.49802e-8	5e-8	5e-8	8.7346e-9	rs7639267	NT5DC2
31768069	Haemoglobin concentration	EUR	Thyroid_sQTL	EUR	sQTL	GTEx v8	Thyroid_sQTL	chr3:52686105:52686769:clu_48066:ENSG00000163938.16	GNL3	3	1616	5.01295670499711e-19	0.00000994969808608935	1.53094624629905e-15	0.0294155904985395	0.970574459803374	32.995239713157	rs66782572	rs66782572_NT5DC2	0.192017268256877	3.51078e-20	5e-8	5e-8	4.41031e-9	rs66782572	NT5DC2
31768069	Haemoglobin concentration	EUR	Thyroid_sQTL	EUR	sQTL	GTEx v8	Thyroid_sQTL	chr3:52686827:52687246:clu_48066:ENSG00000163938.16	GNL3	3	1616	1.5715233248729e-17	0.000311915373259575	3.11506701465008e-15	0.0608889367326252	0.938799147894114	15.4182220658009	rs66782572	rs66782572_NT5DC2	0.28634180023521	3.51078e-20	5e-8	5e-8	1.71859e-7	rs66782572	NT5DC2
31768069	Haemoglobin concentration	EUR	Brain_Cerebellum_sQTL	EUR	sQTL	GTEx v8	Brain_Cerebellum_sQTL	chr3:52686105:52686769:clu_38249:ENSG00000163938.16	GNL3	3	1598	1.7553345832181e-19	0.00000348398130476494	8.99956037988552e-15	0.17780073123088	0.822195784787806	4.62425423729084	rs13083798	rs66782572_NT5DC2	0.601011352180607	5.52303e-20	5e-8	5e-8	6.30704e-12	rs66782572	NT5DC2
31768069	Haemoglobin concentration	EUR	Brain_Cerebellum_sQTL	EUR	sQTL	GTEx v8	Brain_Cerebellum_sQTL	chr3:52686202:52686769:clu_38249:ENSG00000163938.16	GNL3	3	1598	3.93750690144926e-23	7.81514849828929e-10	1.7667904336243e-14	0.35002190514882	0.64997809406965	1.85696404855947	rs13083798	rs66782572_NT5DC2	0.430859435715326	5.52303e-20	5e-8	5e-8	1.35044e-16	rs66782572	NT5DC2
31768069	Haemoglobin concentration	EUR	Lung_sQTL	EUR	sQTL	GTEx v8	Lung_sQTL	chr3:52686105:52686769:clu_47534:ENSG00000163938.16	GNL3	3	1616	2.1136349156847e-17	0.000419513478844531	9.65937490569042e-16	0.018190501717397	0.981389984803757	53.9506826172461	rs1010554	rs66782572_NT5DC2	0.915033643690326	5.88223e-20	5e-8	5e-8	2.46541e-8	rs66782572	NT5DC2
31043756	bipolar disorder	EUR	Brain_Cerebellum_sQTL	EUR	sQTL	GTEx v8	Brain_Cerebellum_sQTL	chr3:52686202:52686769:clu_38249:ENSG00000163938.16	GNL3	3	2036	7.18660272008704e-14	1.19804950820299e-10	0.0000293107941494622	0.0479107809689102	0.952059908117063	19.871517200583	rs11130324	rs2302417_ITIH1	0.211871118105173	1.6820155249318e-8	5e-8	5e-8	2.40661e-18	rs2302417	ITIH1
31043756	bipolar disorder	EUR	Brain_Cerebellum_sQTL	EUR	sQTL	GTEx v8	Brain_Cerebellum_sQTL	chr3:52686105:52686769:clu_38249:ENSG00000163938.16	GNL3	3	2036	6.50994125628766e-10	0.00000108524600903935	0.0000302726059768732	0.0495157856649705	0.950452855832049	19.194946481571	rs11130324	rs2302417_ITIH1	0.222940015212692	1.6820155249318e-8	5e-8	5e-8	5.55563e-13	rs2302417	ITIH1
31043756	bipolar disorder	EUR	Pituitary_sQTL	EUR	sQTL	GTEx v8	Pituitary_sQTL	chr3:52686202:52686769:clu_42737:ENSG00000163938.16	GNL3	3	2066	6.78334025691963e-8	0.000113082420522341	0.0000445810383482883	0.0733928613581854	0.92644940734954	12.6231542169764	rs7646741	rs2302417_ITIH1	0.330129943432917	9.51699848112944e-9	5e-8	5e-8	9.14016e-10	rs2302417	ITIH1
31043756	bipolar disorder	EUR	Thyroid_sQTL	EUR	sQTL	GTEx v8	Thyroid_sQTL	chr3:52686827:52687246:clu_48066:ENSG00000163938.16	GNL3	3	2078	1.48288868794941e-7	0.000247206674859318	0.0000291455465287292	0.0476353324726804	0.952088167017062	19.9870163090202	rs2710323	rs2302417_ITIH1	0.415256405445266	9.84804444652211e-9	5e-8	5e-8	2.06035e-8	rs2302417	ITIH1
31043756	bipolar disorder	EUR	Thyroid_sQTL	EUR	sQTL	GTEx v8	Thyroid_sQTL	chr3:52686105:52686769:clu_48066:ENSG00000163938.16	GNL3	3	2078	1.76540806270785e-8	0.0000294304394185741	0.0000529063955072704	0.0872855868530402	0.912632058657952	10.455701697859	rs2710323	rs2302417_ITIH1	0.351391181764049	9.84804444652211e-9	5e-8	5e-8	2.089e-9	rs2302417	ITIH1
32242144	25 hydroxyvitamin D with BMI as covariate	EUR	Brain_Cerebellum_sQTL	EUR	sQTL	GTEx v8	Brain_Cerebellum_sQTL	chr3:52686202:52686769:clu_38249:ENSG00000163938.16	GNL3	3	1741	3.62951933053587e-16	2.84904976593254e-11	1.45324001327618e-7	0.0104178599903867	0.989581994657124	94.988989636094	rs11130324	rs772585020_GNL3	0.243468138579607	1.3693e-11	5e-8	5e-8	2.40661e-18	rs772585020	GNL3
32242144	25 hydroxyvitamin D with BMI as covariate	EUR	Brain_Cerebellum_sQTL	EUR	sQTL	GTEx v8	Brain_Cerebellum_sQTL	chr3:52686105:52686769:clu_38249:ENSG00000163938.16	GNL3	3	1741	3.284483073986e-12	2.57820798870567e-7	1.52746528358452e-7	0.011001086718916	0.988998502710472	89.9000733272945	rs11130324	rs772585020_GNL3	0.260262915212985	1.3693e-11	5e-8	5e-8	5.55563e-13	rs772585020	GNL3
32242144	25 hydroxyvitamin D with BMI as covariate	EUR	Lung_sQTL	EUR	sQTL	GTEx v8	Lung_sQTL	chr3:52686105:52686769:clu_47534:ENSG00000163938.16	GNL3	3	1764	5.90710586972059e-8	0.00463687853716803	0.00000268603869841962	0.210059662376109	0.785300713976967	3.73846508698514	rs11130306	rs772585020_GNL3	0.201792407008641	4.70357e-10	5e-8	5e-8	9.20197e-8	rs772585020	GNL3
32242144	25 hydroxyvitamin D with BMI as covariate	EUR	Thyroid_sQTL	EUR	sQTL	GTEx v8	Thyroid_sQTL	chr3:52686827:52687246:clu_48066:ENSG00000163938.16	GNL3	3	1765	2.24386638819993e-9	0.000176135932996865	4.43189473801695e-7	0.0338228763145928	0.966000542319071	28.560567508633	rs11130324	rs772585020_GNL3	0.247684065902882	1.3693e-11	5e-8	5e-8	8.65905e-8	rs772585020	GNL3
32242144	25 hydroxyvitamin D with BMI as covariate	EUR	Thyroid_sQTL	EUR	sQTL	GTEx v8	Thyroid_sQTL	chr3:52686105:52686769:clu_48066:ENSG00000163938.16	GNL3	3	1765	1.6864888114497e-10	0.0000132383675719554	5.10089015762739e-7	0.039079358059759	0.960906893315003	24.5886048549112	rs11130324	rs772585020_GNL3	0.268087255289633	1.3693e-11	5e-8	5e-8	3.64328e-9	rs772585020	GNL3
31768069	Platelet distribution width	EUR	Brain_Cerebellum_sQTL	EUR	sQTL	GTEx v8	Brain_Cerebellum_sQTL	chr3:52686202:52686769:clu_38249:ENSG00000163938.16	GNL3	3	733	3.03046173415573e-7	0.00125705635824206	0.00000419493518806382	0.0164185596272601	0.982319886033136	59.8298455122804	rs7614727	rs62259688_IQCF6	0.426933970920128	6.24061e-10	5e-8	5e-8	1.45672e-8	rs62259688	IQCF6
32888493	hemoglobin concentration	EUR	Thyroid_sQTL	EUR	sQTL	GTEx v8	Thyroid_sQTL	chr3:52686105:52686769:clu_48066:ENSG00000163938.16	GNL3	3	2041	1.72378323057842e-24	0.00000668318846519143	5.20559929113653e-21	0.019201560943583	0.980791755867951	51.0787512926507	rs66782572	rs66782572_NT5DC2	0.289004692309619	6.9e-26	5e-8	5e-8	4.41031e-9	rs66782572	NT5DC2
32888493	hemoglobin concentration	EUR	Thyroid_sQTL	EUR	sQTL	GTEx v8	Thyroid_sQTL	chr3:52686827:52687246:clu_48066:ENSG00000163938.16	GNL3	3	2041	5.58008867750747e-23	0.000216342656215246	1.09710865273277e-20	0.0415772107853695	0.958206446558415	23.0464340550616	rs66782572	rs66782572_NT5DC2	0.441868711974572	6.9e-26	5e-8	5e-8	1.71859e-7	rs66782572	NT5DC2
32888493	hemoglobin concentration	EUR	Lung_sQTL	EUR	sQTL	GTEx v8	Lung_sQTL	chr3:52686105:52686769:clu_47534:ENSG00000163938.16	GNL3	3	2018	8.44796145057854e-22	0.0032753141964152	3.82797682448083e-20	0.147563291836531	0.849161393967057	5.75455713544089	rs66782572	rs66782572_NT5DC2	0.331310628935604	6.9e-26	5e-8	5e-8	6.58541E-06	rs66782572	NT5DC2
32888493	hematocrit	EUR	Thyroid_sQTL	EUR	sQTL	GTEx v8	Thyroid_sQTL	chr3:52686105:52686769:clu_48066:ENSG00000163938.16	GNL3	3	2041	1.94114641897676e-23	0.0000101610313846438	5.86202386067218e-20	0.0297147922122183	0.9702750467564	32.6529305615482	rs66782572	rs66782572_NT5DC2	0.536303598659023	4.22e-25	5e-8	5e-8	4.41031e-9	rs66782572	NT5DC2
32888493	hematocrit	EUR	Thyroid_sQTL	EUR	sQTL	GTEx v8	Thyroid_sQTL	chr3:52686827:52687246:clu_48066:ENSG00000163938.16	GNL3	3	2041	2.98690204618932e-22	0.000156350933332401	5.8726001237025e-20	0.0297703559620255	0.970073293104642	32.5852097415983	rs2577831	rs66782572_NT5DC2	0.497067773361825	1.01e-24	5e-8	5e-8	4.23046e-8	rs66782572	NT5DC2
32888493	hematocrit	EUR	Brain_Cerebellum_sQTL	EUR	sQTL	GTEx v8	Brain_Cerebellum_sQTL	chr3:52686105:52686769:clu_38249:ENSG00000163938.16	GNL3	3	1947	1.2106543200327e-23	0.00000633722517263354	6.10251093636687e-19	0.318757477924483	0.681236184850344	2.13716142217606	rs13083798	rs66782572_NT5DC2	0.176854307942165	1.36e-23	5e-8	5e-8	6.30704e-12	rs66782572	NT5DC2
32888493	hematocrit	EUR	Brain_Cerebellum_sQTL	EUR	sQTL	GTEx v8	Brain_Cerebellum_sQTL	chr3:52686202:52686769:clu_38249:ENSG00000163938.16	GNL3	3	1947	1.59698707246489e-27	8.35950155922416e-10	7.01932266582759e-19	0.366796438052178	0.633203561111874	1.72630782478263	rs11130324	rs66782572_NT5DC2	0.182907061660667	8.97e-23	5e-8	5e-8	2.40661e-18	rs66782572	NT5DC2
32888493	hematocrit	EUR	Lung_sQTL	EUR	sQTL	GTEx v8	Lung_sQTL	chr3:52686105:52686769:clu_47534:ENSG00000163938.16	GNL3	3	2018	3.22515677570423e-21	0.00168822495095037	1.46140511664202e-19	0.0755752681776566	0.922736506871392	12.2095035733422	rs1010554	rs66782572_NT5DC2	0.711244118394615	1.08e-23	5e-8	5e-8	2.46541e-8	rs66782572	NT5DC2
34737426	Nervous feelings	EUR	Brain_Cerebellum_sQTL	EUR	sQTL	GTEx v8	Brain_Cerebellum_sQTL	chr3:52686202:52686769:clu_38249:ENSG00000163938.16	GNL3	3	1946	2.74356284481492e-17	4.9784846943316e-11	1.11882917649644e-8	0.0193216593454286	0.980678329416496	50.7553886487767	rs13081155	rs2710323_ITIH1	0.168275799132765	2.02619e-12	5e-8	5e-8	3.4437e-18	rs2710323	ITIH1
34737426	Nervous feelings	EUR	Brain_Cerebellum_sQTL	EUR	sQTL	GTEx v8	Brain_Cerebellum_sQTL	chr3:52686105:52686769:clu_38249:ENSG00000163938.16	GNL3	3	1946	2.53243211161503e-13	4.59536566874587e-7	1.17956354152864e-8	0.0204248522299489	0.979574676437595	47.9599394604798	rs11130324	rs2710323_ITIH1	0.179859190702678	2.5641e-12	5e-8	5e-8	5.55563e-13	rs2710323	ITIH1
34737426	Nervous feelings	EUR	Pituitary_sQTL	EUR	sQTL	GTEx v8	Pituitary_sQTL	chr3:52686202:52686769:clu_42737:ENSG00000163938.16	GNL3	3	1967	2.66292089634814e-11	0.0000483215135871335	1.76029495525846e-8	0.0309734338493455	0.96897822700749	31.2841718396672	rs7646741	rs2710323_ITIH1	0.23236413455122	1.87087e-12	5e-8	5e-8	9.14016e-10	rs2710323	ITIH1
34737426	Nervous feelings	EUR	Thyroid_sQTL	EUR	sQTL	GTEx v8	Thyroid_sQTL	chr3:52686827:52687246:clu_48066:ENSG00000163938.16	GNL3	3	1978	6.1257293930517e-11	0.000111157832969816	1.20560864164444e-8	0.0208980520059369	0.978990778043749	46.8460303269237	rs2710323	rs2710323_ITIH1	0.551140539429074	8.63963e-13	5e-8	5e-8	2.06035e-8	rs2710323	ITIH1
34737426	Nervous feelings	EUR	Thyroid_sQTL	EUR	sQTL	GTEx v8	Thyroid_sQTL	chr3:52686105:52686769:clu_48066:ENSG00000163938.16	GNL3	3	1978	6.74347666835383e-12	0.0000122367510061247	2.02439526680941e-8	0.0357705741505553	0.964217168847743	26.9555966529761	rs2710323	rs2710323_ITIH1	0.419721845840005	8.63963e-13	5e-8	5e-8	2.089e-9	rs2710323	ITIH1
34737426	Nervous feelings	EUR	Lung_sQTL	EUR	sQTL	GTEx v8	Lung_sQTL	chr3:52686105:52686769:clu_47534:ENSG00000163938.16	GNL3	3	1972	4.54028267405957e-9	0.00823882268761837	2.01899268328038e-7	0.365741537815817	0.626019433057013	1.71164433986787	rs2710323	rs2710323_ITIH1	0.395006762146143	8.63963e-13	5e-8	5e-8	8.27893E-06	rs2710323	ITIH1
31768069	Duration to complete alphanumeric path (trail #2)	EUR	Pituitary_sQTL	EUR	sQTL	GTEx v8	Pituitary_sQTL	chr3:52686202:52686769:clu_42737:ENSG00000163938.16	GNL3	3	1611	8.29411838171724e-7	0.000188227416875973	0.000587394650944091	0.132437047306713	0.866786501213629	6.54489449018164	rs7639267	rs7639267_NT5DC2	0.492757	7.84934e-9	5e-8	5e-8	8.7346e-9	rs7639267	NT5DC2
31768069	Duration to complete alphanumeric path (trail #2)	EUR	Thyroid_sQTL	EUR	sQTL	GTEx v8	Thyroid_sQTL	chr3:52686105:52686769:clu_48066:ENSG00000163938.16	GNL3	3	1614	3.17242337632717e-8	0.00000719951541556805	0.0000971489005837884	0.0210681986023694	0.978827421257397	46.4599484621963	rs7639267	rs7639267_NT5DC2	0.438977346453781	7.84934e-9	5e-8	5e-8	1.55513e-9	rs7639267	NT5DC2
31768069	Impedance of leg (right)	EUR	Thyroid_sQTL	EUR	sQTL	GTEx v8	Thyroid_sQTL	chr3:52686827:52687246:clu_48066:ENSG00000163938.16	GNL3	3	1765	8.94406590298997e-18	0.000113248386111316	1.76673573874167e-15	0.021391640940179	0.97849511067371	45.7419378630204	rs2577831	rs772585020_GNL3	0.327376375916743	5.25335e-20	5e-8	5e-8	4.23046e-8	rs772585020	GNL3
31768069	Impedance of leg (right)	EUR	Thyroid_sQTL	EUR	sQTL	GTEx v8	Thyroid_sQTL	chr3:52686105:52686769:clu_48066:ENSG00000163938.16	GNL3	3	1765	1.12289330880803e-18	0.0000142179022803481	3.39672460084446e-15	0.0420508692800989	0.957934912817618	22.7803831220909	rs2577831	rs772585020_GNL3	0.457476785569061	5.25335e-20	5e-8	5e-8	2.46139e-9	rs772585020	GNL3
31768069	Impedance of leg (right)	EUR	Brain_Cerebellum_sQTL	EUR	sQTL	GTEx v8	Brain_Cerebellum_sQTL	chr3:52686202:52686769:clu_38249:ENSG00000163938.16	GNL3	3	1741	1.50718240868271e-23	1.90837092665499e-10	6.03467727854856e-15	0.0754856308382897	0.924514368970866	12.2475543849057	rs11130324	rs772585020_GNL3	0.149735229194465	7.32238e-19	5e-8	5e-8	2.40661e-18	rs772585020	GNL3
31768069	Impedance of leg (right)	EUR	Brain_Cerebellum_sQTL	EUR	sQTL	GTEx v8	Brain_Cerebellum_sQTL	chr3:52686105:52686769:clu_38249:ENSG00000163938.16	GNL3	3	1741	1.33146554421806e-19	0.00000168588096556236	6.19204711752087e-15	0.0774802195400955	0.922518094578932	11.906498201151	rs11130324	rs772585020_GNL3	0.156503108880501	7.32238e-19	5e-8	5e-8	5.55563e-13	rs772585020	GNL3
31768069	Mean sphered cell volume	EUR	Thyroid_sQTL	EUR	sQTL	GTEx v8	Thyroid_sQTL	chr3:52686105:52686769:clu_48066:ENSG00000163938.16	GNL3	3	1750	0.00000109683510631414	0.0000394539913973043	0.00332096553476203	0.118579592386477	0.878058891252258	7.40480611866562	rs2276824	rs2878632_PBRM1	0.25623428955372	3.10263e-8	5e-8	5e-8	1.78612e-8	rs2878632	PBRM1
34127677	Cataracts	EUR	Thyroid_sQTL	EUR	sQTL	GTEx v8	Thyroid_sQTL	chr3:52686105:52686769:clu_48066:ENSG00000163938.16	GNL3	3	1251	9.5723311512138e-8	0.00008708513945021229	0.000135642288836991	0.12252453373593	0.877252643112472	7.15981213201892	rs67409736	rs35173917_NEK4	0.784272184405813	9.267e-9	5e-8	5e-8	2.10653e-9	rs35173917	NEK4
32242144	meta-analysis between the UKB 25OHD GWAS and the SUNLIGHT consortium GWAS	EUR	Brain_Cerebellum_sQTL	EUR	sQTL	GTEx v8	Brain_Cerebellum_sQTL	chr3:52686202:52686769:clu_38249:ENSG00000163938.16	GNL3	3	1662	5.37996952734598e-16	3.6254497015828e-11	2.21777502501928e-7	0.0139590844817542	0.986040693704489	70.6379200579617	rs11130324	rs4481150_ITIH3	0.172703018588321	3.00481430322948e-11	5e-8	5e-8	2.40661e-18	rs4481150	ITIH3
32242144	meta-analysis between the UKB 25OHD GWAS and the SUNLIGHT consortium GWAS	EUR	Brain_Cerebellum_sQTL	EUR	sQTL	GTEx v8	Brain_Cerebellum_sQTL	chr3:52686105:52686769:clu_38249:ENSG00000163938.16	GNL3	3	1662	4.99997806601038e-12	3.36938134968959e-7	2.34505576425982e-7	0.014817661869358	0.985181766681932	66.4869920347708	rs11130324	rs4481150_ITIH3	0.185937771165244	3.00481430322948e-11	5e-8	5e-8	5.55563e-13	rs4481150	ITIH3
32242144	meta-analysis between the UKB 25OHD GWAS and the SUNLIGHT consortium GWAS	EUR	Thyroid_sQTL	EUR	sQTL	GTEx v8	Thyroid_sQTL	chr3:52686827:52687246:clu_48066:ENSG00000163938.16	GNL3	3	1682	2.70304061320824e-9	0.000182152310719567	5.32039637425799e-7	0.0348881204723939	0.964929192474209	27.6578153081572	rs11130324	rs4481150_ITIH3	0.137715284331709	3.00481430322948e-11	5e-8	5e-8	8.65905e-8	rs4481150	ITIH3
32242144	meta-analysis between the UKB 25OHD GWAS and the SUNLIGHT consortium GWAS	EUR	Thyroid_sQTL	EUR	sQTL	GTEx v8	Thyroid_sQTL	chr3:52686105:52686769:clu_48066:ENSG00000163938.16	GNL3	3	1682	2.14842522058624e-10	0.0000144777927651444	6.45759040260616e-7	0.0425589388470517	0.957425937386301	22.4964710898243	rs11130324	rs4481150_ITIH3	0.158016354415024	3.00481430322948e-11	5e-8	5e-8	3.64328e-9	rs4481150	ITIH3
32242144	meta-analysis between the UKB 25OHD GWAS and the SUNLIGHT consortium GWAS	EUR	Lung_sQTL	EUR	sQTL	GTEx v8	Lung_sQTL	chr3:52686105:52686769:clu_47534:ENSG00000163938.16	GNL3	3	1681	5.22441124415142e-8	0.00352062265026595	0.00000232460056668237	0.155809355207417	0.840667645297639	5.39548889204069	rs11130306	rs4481150_ITIH3	0.31676959059739	2.41031782857352e-10	5e-8	5e-8	9.20197e-8	rs4481150	ITIH3
31768069	Haematocrit percentage	EUR	Thyroid_sQTL	EUR	sQTL	GTEx v8	Thyroid_sQTL	chr3:52686105:52686769:clu_48066:ENSG00000163938.16	GNL3	3	1616	3.16002457750028e-17	0.0000247021642708419	9.66541406593673e-14	0.0746299676577171	0.925345330177912	12.3991120352874	rs66782572	rs1010554_STAB1	0.435691851567779	1.06797e-18	5e-8	5e-8	4.41031e-9	rs1010554	STAB1
31768069	Haematocrit percentage	EUR	Thyroid_sQTL	EUR	sQTL	GTEx v8	Thyroid_sQTL	chr3:52686827:52687246:clu_48066:ENSG00000163938.16	GNL3	3	1616	6.44002158625592e-16	0.000503421626097931	1.27769912758063e-13	0.0989782419838067	0.90051833638997	9.09814438346257	rs66782572	rs1010554_STAB1	0.419670480057933	1.06797e-18	5e-8	5e-8	1.71859e-7	rs1010554	STAB1
31768069	Haematocrit percentage	EUR	Lung_sQTL	EUR	sQTL	GTEx v8	Lung_sQTL	chr3:52686105:52686769:clu_47534:ENSG00000163938.16	GNL3	3	1615	1.77319752680514e-16	0.00013861226770041	8.10742505137066e-15	0.00534312068514779	0.99451826704714	186.130601506268	rs1010554	rs1010554_STAB1	0.954476472707295	4.78985e-19	5e-8	5e-8	2.46541e-8	rs1010554	STAB1
31768069	Red blood cell (erythrocyte) distribution width	EUR	Brain_Cerebellum_sQTL	EUR	sQTL	GTEx v8	Brain_Cerebellum_sQTL	chr3:52686202:52686769:clu_38249:ENSG00000163938.16	GNL3	3	1915	2.56849806358168e-23	1.95342003817726e-10	1.06388580461005e-14	0.0799917073332594	0.920008292471387	11.5012958610631	rs35212380	rs2276823_AC006254.1	0.17350400865991	9.00089e-19	5e-8	5e-8	3.4437e-18	rs2276823	AC006254.1
31768069	Red blood cell (erythrocyte) distribution width	EUR	Brain_Cerebellum_sQTL	EUR	sQTL	GTEx v8	Brain_Cerebellum_sQTL	chr3:52686105:52686769:clu_38249:ENSG00000163938.16	GNL3	3	1915	2.29064450068952e-19	0.00000174210404571915	1.07806327906361e-14	0.0810710279740662	0.918927229921878	11.3348412236222	rs35212380	rs2276823_AC006254.1	0.154808781287527	9.00089e-19	5e-8	5e-8	9.63688e-13	rs2276823	AC006254.1
31768069	Red blood cell (erythrocyte) distribution width	EUR	Thyroid_sQTL	EUR	sQTL	GTEx v8	Thyroid_sQTL	chr3:52686827:52687246:clu_48066:ENSG00000163938.16	GNL3	3	1949	1.10861864734709e-16	0.00084313798471004	2.18371506287075e-14	0.165244217260031	0.833912644755234	5.04654661193362	rs11130324	rs2276823_AC006254.1	0.109923455367285	1.31618e-18	5e-8	5e-8	8.65905e-8	rs2276823	AC006254.1
31768069	Red blood cell (erythrocyte) distribution width	EUR	Thyroid_sQTL	EUR	sQTL	GTEx v8	Thyroid_sQTL	chr3:52686105:52686769:clu_48066:ENSG00000163938.16	GNL3	3	1949	1.02085053250758e-17	0.0000776387680947182	3.06840101757567e-14	0.232593841837233	0.767328519394641	3.29900617029926	rs11130324	rs2276823_AC006254.1	0.157534537747004	1.31618e-18	5e-8	5e-8	3.64328e-9	rs2276823	AC006254.1
31768069	Red blood cell (erythrocyte) count	EUR	Brain_Cerebellum_sQTL	EUR	sQTL	GTEx v8	Brain_Cerebellum_sQTL	chr3:52686105:52686769:clu_38249:ENSG00000163938.16	GNL3	3	1727	3.82591363082953e-20	0.00000217769172614477	1.78165311461353e-15	0.100511356039152	0.899486466269117	8.94910288464066	rs13083798	rs2878632_PBRM1	0.268309605506309	2.23002e-20	5e-8	5e-8	6.30704e-12	rs2878632	PBRM1
31768069	Red blood cell (erythrocyte) count	EUR	Brain_Cerebellum_sQTL	EUR	sQTL	GTEx v8	Brain_Cerebellum_sQTL	chr3:52686202:52686769:clu_38249:ENSG00000163938.16	GNL3	3	1727	5.4384529591893e-24	3.09554139351709e-10	2.17779237355253e-15	0.123081981496175	0.87691801819427	7.12466607650059	rs11130324	rs2878632_PBRM1	0.243064106823433	1.69744e-19	5e-8	5e-8	2.40661e-18	rs2878632	PBRM1
31768069	Red blood cell (erythrocyte) count	EUR	Thyroid_sQTL	EUR	sQTL	GTEx v8	Thyroid_sQTL	chr3:52686827:52687246:clu_48066:ENSG00000163938.16	GNL3	3	1750	4.61398109593336e-18	0.00026262563009894	9.12109792208667e-16	0.0509680903470979	0.948769284022801	18.6149662967866	rs2577831	rs2878632_PBRM1	0.203702475750879	4.51695e-20	5e-8	5e-8	4.23046e-8	rs2878632	PBRM1
31768069	Red blood cell (erythrocyte) count	EUR	Thyroid_sQTL	EUR	sQTL	GTEx v8	Thyroid_sQTL	chr3:52686105:52686769:clu_48066:ENSG00000163938.16	GNL3	3	1750	4.34198084368796e-19	0.0000247143503894309	1.31464077646545e-15	0.0739026609774868	0.926072624672126	12.5309780787763	rs11235	rs2878632_PBRM1	0.224204794997331	1.21198e-20	5e-8	5e-8	1.0794e-8	rs2878632	PBRM1
32888493	RBC distribution width	EUR	Thyroid_sQTL	EUR	sQTL	GTEx v8	Thyroid_sQTL	chr3:52686827:52687246:clu_48066:ENSG00000163938.16	GNL3	3	2224	1.63865235919097e-19	0.000448292836587506	3.21959722731683e-17	0.087167455600235	0.912384251563176	10.4670286092498	rs10933	rs10933_PBRM1	0.285130732302607	2.13e-22	5e-8	5e-8	2.9579e-7	rs10933	PBRM1
32888493	RBC distribution width	EUR	Thyroid_sQTL	EUR	sQTL	GTEx v8	Thyroid_sQTL	chr3:52686105:52686769:clu_48066:ENSG00000163938.16	GNL3	3	2224	1.51674949778253e-20	0.0000414943371569858	4.55241478636938e-17	0.123665983113756	0.876292522549084	7.0859625297525	rs10933	rs10933_PBRM1	0.286224148260069	2.13e-22	5e-8	5e-8	1.78612e-8	rs10933	PBRM1
