# Supplementary material for: Integrative Genomics Establishes GNL3 as a Pleiotropic Hub and Causal Gene for Osteoarthritis
Source: Research Square preprint supplement (doi:10.21203/rs.3.rs-7630649/v1), 2025-09-29
Supplement: Supplementary file 3 [file 214ef1a40dea0acbaee7b3ef.xlsx]

## Sheet: Sheet1
pmid	trait1_description	gwas_population1	trait2_description	gwas_population2	locus	cytoband	coloc_snp	gene	pp_h4_abf	pp4_pp3	nsnps	pp_h0_abf	pp_h1_abf	pp_h2_abf	pp_h3_abf	snp_pp_h4	p1_threshold	p2_threshold	chr	bp
31768069	Impedance of leg (left)	EUR	Neuroticism	EUR	rs772585020_GNL3	3p21.1	rs3617	GNL3	0.962594254057837	26.1480841420661	1496	2.58490865170526e-19	0.000592561128009527	1.64787957769562e-17	0.0368131848141505	0.262333545832298	5e-8	5e-8	3	52833805
31768069	Impedance of leg (left)	EUR	Worry subcluster	EUR	rs772585020_GNL3	3p21.1	rs2577831	GNL3	0.790975379349619	3.78413504588551	1735	2.18412965069253e-22	5.31985883872981e-7	8.6142004220837e-17	0.209024088664501	0.44105431101109	5e-8	5e-8	3	52628056
31768069	Impedance of leg (left)	EUR	Body mass index	EUR	rs772585020_GNL3	3p21.1	rs2710323	GNL3	0.975144950271435	39.2332729535932	1735	4.74131141712064e-29	1.15483563173744e-13	1.06048855413667e-17	0.0248550497284506	0.995522740410469	5e-8	5e-8	3	52815905
31768069	Impedance of leg (left)	EUR	25 hydroxyvitamin D conditioned on BMI with mtCOJO	EUR	rs772585020_GNL3	3p21.1	rs2577831	GNL3	0.954550610920854	21.0045176519485	1799	1.79604580724814e-21	0.00000437449999452119	1.90503473819043e-17	0.0454450145791519	0.129082388897401	5e-8	5e-8	3	52628056
31768069	Impedance of leg (left)	EUR	25 hydroxyvitamin D	EUR	rs772585020_GNL3	3p21.1	rs772585020	GNL3	0.989395276724171	95.451042867112	1990	4.54640032114524e-21	0.000239249552279689	2.15773779208765e-19	0.0103654737235466	0.99276667398158	5e-8	5e-8	3	52725718
31768069	Impedance of leg (left)	EUR	Waist-to-hip ratio adjusted for body mass index	EUR	rs772585020_GNL3	3p21.1	rs2710323	GNL3	0.990399712254514	103.165239071894	514	1.50124869732408e-22	1.57690397041607e-7	1.0082426904538e-17	0.0096001300550888	0.877639481933008	5e-8	5e-8	3	52815905
31768069	Impedance of leg (left)	EUR	Neuroticism	EUR	rs772585020_GNL3	3p21.1	rs3617	GNL3	0.962594254057837	26.1480841420661	1496	2.58490865170526e-19	0.000592561128009527	1.64787957769562e-17	0.0368131848141505	0.262333545832298	5e-8	5e-8	3	52833805
31768069	Impedance of leg (left)	EUR	The first PC of the four risky behaviors	EUR	rs772585020_GNL3	3p21.1	rs2577831	GNL3	0.782738988604219	3.60987728862556	1743	1.7589949954224e-19	0.000428436208092526	8.93445141500977e-17	0.216832575187685	0.569109897035165	5e-8	5e-8	3	52628056
31768069	Impedance of leg (left)	EUR	hematocrit	EUR	rs772585020_GNL3	3p21.1	rs2577831	GNL3	0.795807513691917	3.89733984869162	1950	7.42518692521491e-36	3.90770234819187e-19	3.89506739123016e-18	0.204192486308085	0.973186881977259	5e-8	5e-8	3	52628056
31768069	Impedance of leg (left)	EUR	meta-analysis between the UKB 25OHD GWAS and the SUNLIGHT consortium GWAS	EUR	rs772585020_GNL3	3p21.1	rs4481150	GNL3	0.966351449935114	28.7193934175058	1546	2.07278159377063e-22	5.04791546339447e-7	1.4213408470837e-17	0.0336480452733405	0.308661953270859	5e-8	5e-8	3	52837793
31768069	Impedance of leg (left)	EUR	25 hydroxyvitamin D with BMI as covariate	EUR	rs772585020_GNL3	3p21.1	rs772585020	GNL3	0.998384595001172	618.046366498967	1990	3.25757447967418e-25	1.71426443059784e-8	4.96688741869732e-20	0.00161538785618415	0.99798075207175	5e-8	5e-8	3	52725718
31768069	Impedance of leg (left)	EUR	Body mass index	EUR	rs772585020_GNL3	3p21.1	rs2710323	GNL3	0.99887860215042	890.744174821014	254	4.24602641160113e-29	2.67606916972075e-14	3.36416932555914e-18	0.0011213978495578	0.998383514941057	5e-8	5e-8	3	52815905
31768069	Impedance of leg (left)	EUR	Cognitive performance	EUR	rs772585020_GNL3	3p21.1	rs2577831	GNL3	0.100534922220367	0.111774680492611	1734	9.18083717109254e-21	0.0000223616180485669	3.69318539410653e-16	0.899442716161587	0.5732714189563	5e-8	5e-8	3	52628056
31768069	Impedance of leg (left)	EUR	red blood cell count	EUR	rs772585020_GNL3	3p21.1	rs2577831	GNL3	0.75429907278379	3.06998871078783	1950	3.84497133254745e-31	2.02351855330446e-14	4.68299773328044e-18	0.245700927216185	0.73894484666591	5e-8	5e-8	3	52628056
31768069	Impedance of leg (left)	EUR	Automobile speeding propensity	EUR	rs772585020_GNL3	3p21.1	rs2577831	GNL3	0.928064410529994	13.1741632739311	1743	6.11652392599682e-19	0.00148979407239985	2.93033734859721e-17	0.0704457953976051	0.194346694697497	5e-8	5e-8	3	52628056
32242144	25 hydroxyvitamin D	EUR	Age when periods started (menarche)	EUR	rs772585020_GNL3	3p21.1	rs7639267	GNL3	0.958042719383145	23.3261101717355	1990	3.5222811928098e-10	1.67168720465222e-8	0.000885575541065997	0.0410716880066877	0.247198799894756	5e-8	5e-8	3	52568805
31768069	Impedance of leg (right)	EUR	Neuroticism	EUR	rs772585020_GNL3	3p21.1	rs3617	GNL3	0.979256997448954	47.9850966615859	1496	2.68207477518993e-17	0.000335478849362411	1.70982299315388e-15	0.0204075237016849	0.529425036676235	5e-8	5e-8	3	52833805
31768069	Impedance of leg (right)	EUR	Worry subcluster	EUR	rs772585020_GNL3	3p21.1	rs2710323	GNL3	0.687985463547372	2.2049844843837	1735	5.65625838042841e-20	7.92854919551846e-7	2.23082651309879e-14	0.312013743597686	0.430786918333044	5e-8	5e-8	3	52815905
31768069	Impedance of leg (right)	EUR	Age when periods started (menarche)	EUR	rs772585020_GNL3	3p21.1	rs772585020	GNL3	0.260501633660974	0.352268171461733	1990	7.38036489157401e-22	2.94230993368864e-7	1.85557889173133e-15	0.739498072108033	0.782939003023585	5e-8	5e-8	3	52725718
31768069	Impedance of leg (right)	EUR	Body mass index	EUR	rs772585020_GNL3	3p21.1	rs2710323	GNL3	0.958557991316549	23.1301044947616	1735	1.35238290237355e-26	1.89567619643192e-13	3.02487321039174e-15	0.0414420086832569	0.984304176224844	5e-8	5e-8	3	52815905
31768069	Impedance of leg (right)	EUR	25 hydroxyvitamin D conditioned on BMI with mtCOJO	EUR	rs772585020_GNL3	3p21.1	rs2302417	GNL3	0.949712633769259	18.8875245210253	1799	3.4457570845178e-19	0.00000483012008698144	3.65485497022473e-15	0.0502825361106508	0.219215170963935	5e-8	5e-8	3	52814256
31768069	Impedance of leg (right)	EUR	25 hydroxyvitamin D	EUR	rs772585020_GNL3	3p21.1	rs772585020	GNL3	0.989565452009371	97.027573335945	1990	5.91323746972387e-19	0.000235741424753835	2.8064435730987e-17	0.0101988065658731	0.995979153595488	5e-8	5e-8	3	52725718
31768069	Impedance of leg (right)	EUR	Waist-to-hip ratio adjusted for body mass index	EUR	rs772585020_GNL3	3p21.1	rs2710323	GNL3	0.974841094056944	38.747955648035	514	4.16232965114983e-20	3.89119305324701e-7	2.79543186516085e-15	0.0251585168237484	0.842369487331606	5e-8	5e-8	3	52815905
31768069	Impedance of leg (right)	EUR	Neuroticism	EUR	rs772585020_GNL3	3p21.1	rs3617	GNL3	0.979256997448954	47.9850966615859	1496	2.68207477518993e-17	0.000335478849362411	1.70982299315388e-15	0.0204075237016849	0.529425036676235	5e-8	5e-8	3	52833805
31768069	Impedance of leg (right)	EUR	The first PC of the four risky behaviors	EUR	rs772585020_GNL3	3p21.1	rs2577831	GNL3	0.724999364981875	2.64155934796566	1743	3.86505175747925e-17	0.000541775882412345	1.96317313201929e-14	0.274458859135691	0.305992880491721	5e-8	5e-8	3	52628056
31768069	Impedance of leg (right)	EUR	hematocrit	EUR	rs772585020_GNL3	3p21.1	rs2577831	GNL3	0.542006459405551	1.18343690765172	1950	2.19243297810835e-33	8.74108662765703e-19	1.15009551766137e-15	0.457993540594442	0.956232321371511	5e-8	5e-8	3	52628056
31768069	Impedance of leg (right)	EUR	meta-analysis between the UKB 25OHD GWAS and the SUNLIGHT consortium GWAS	EUR	rs772585020_GNL3	3p21.1	rs4481150	GNL3	0.966165558686054	28.5561106784258	1546	3.62088764553453e-20	5.07499700649551e-7	2.4829029400714e-15	0.0338339338142429	0.421960875003099	5e-8	5e-8	3	52837793
31768069	Impedance of leg (right)	EUR	25 hydroxyvitamin D with BMI as covariate	EUR	rs772585020_GNL3	3p21.1	rs772585020	GNL3	0.998429299985094	635.665627625698	1990	4.22651651500813e-23	1.6849738068107e-8	6.44425226016935e-18	0.001570683165164	0.998874760048302	5e-8	5e-8	3	52725718
31768069	Impedance of leg (right)	EUR	Body mass index	EUR	rs772585020_GNL3	3p21.1	rs2710323	GNL3	0.997846798295367	463.424674134702	254	1.24280867871529e-26	3.97703976010745e-14	9.84689785030335e-16	0.00215320170458884	0.996767706719619	5e-8	5e-8	3	52815905
31768069	Impedance of leg (right)	EUR	red blood cell count	EUR	rs772585020_GNL3	3p21.1	rs2577831	GNL3	0.543981442774604	1.19289321488243	1950	9.40221839286413e-29	3.7486028665326e-14	1.14514683240611e-15	0.456018557225358	0.567875860291321	5e-8	5e-8	3	52628056
31768069	Impedance of leg (right)	EUR	Automobile speeding propensity	EUR	rs772585020_GNL3	3p21.1	rs13083798	GNL3	0.898965402864118	9.08500752268546	1743	1.48685338108456e-16	0.00208416692220503	7.12329755788549e-15	0.098950430213666	0.113633990002905	5e-8	5e-8	3	52649748
32242144	25 hydroxyvitamin D with BMI as covariate	EUR	Age when periods started (menarche)	EUR	rs772585020_GNL3	3p21.1	rs7646741	GNL3	0.880526472280379	7.37010666261388	1990	3.13954094746441e-13	4.78691938733684e-8	7.89346597007987e-7	0.119472690503517	0.135194921230326	5e-8	5e-8	3	52785238
