# Supplementary material for: Integrative Genomics Establishes GNL3 as a Pleiotropic Hub and Causal Gene for Osteoarthritis
Source: Research Square preprint supplement (doi:10.21203/rs.3.rs-7630649/v1), 2025-09-29
Supplement: Supplementary file 4 [file 5df6b5f2b27b0f48232fcc27.xlsx]

## Sheet: Sheet1
pmid	Used_Info	trait	description	population	trait_type	n_control	n_case	sample_size	author	year	source
34737426	34737426	Nervous feelings	Nervous feelings	EUR	Binary	339154	105190	444344	Jiang	2021	https://yanglab.westlake.edu.cn/resources/fastgwa_data/UKBbin/1970.v1.0.fastGWA.gz
34737426	34737426	Worrier / anxious feelings	Worrier / anxious feelings	EUR	Binary	192422	251982	444404	Jiang	2021	https://yanglab.westlake.edu.cn/resources/fastgwa_data/UKBbin/1980.v1.0.fastGWA.gz
34737426	34737426	Coffee type: Ground coffee (include espresso, filter etc)	Coffee type: Ground coffee (include espresso, filter etc)	EUR	Binary	275522	81903	357425	Jiang	2021	https://yanglab.westlake.edu.cn/resources/fastgwa_data/UKBbin/1508_3.v1.0.fastGWA.gz
34002096	34002096	Bipolar disorder all type	Bipolar disorder all type	EUR	Binary	371549	41917	413466	Mullins	2021	https://pgc.unc.edu/for-researchers/download-results/
34002096	34002096	Bipolar disorder type I	Bipolar disorder type I	EUR	Binary	449978	25060	475038	Mullins	2021	https://pgc.unc.edu/for-researchers/download-results/
29483656	29483656	Schizophrenia	Schizophrenia	EUR	Binary	64643	40675	105318	Pardinas	2018	https://pgc.unc.edu/for-researchers/download-results/
23974872	23974872	Schizophrenia	Schizophrenia	EUR	Binary	42221	32405	42221	Ripke	2014	https://pgc.unc.edu/for-researchers/download-results/
35396580	35396580	Schizophrenia	Schizophrenia	EUR	Binary	94015	67390	161405	Trubetskoy	2022	https://pgc.unc.edu/for-researchers/download-results/
29500382	29500382	Nervous	Nervous	EUR	Binary	283572	89549	373121	Mats Nagel	2018	https://ctg.cncr.nl/software/summary_statistics
29500382	29500382	Worry	Worry	EUR	Binary	160334	212535	372869	Mats Nagel	2018	https://ctg.cncr.nl/software/summary_statistics
31043756	31043756	Bipolar disorder	Bipolar disorder	EUR	Binary	31358	20352	51710	Stahl, E	2019	https://gwas.mrcieu.ac.uk/files/ieu-b-41/ieu-b-41.vcf.gz
22763110	22763110	Osteoarthritis	Osteoarthritis	EUR	Binary	11009	7410	18419	Zeggini	2012	https://www.ebi.ac.uk/gwas/studies/GCST001592
33888516	33888516	Haemorrhoidal disease	Haemorrhoidal disease	EUR	Binary	725213	218920	944133	Zheng	2021	https://www.ebi.ac.uk/gwas/studies/GCST90014033
34127677	34127677	Cataracts	Cataracts	EUR	Binary	428084	31852	459936	Choquet	2021	https://www.ebi.ac.uk/gwas/studies/GCST90014268
30664745	30664745	Osteoarthritis of the hip or knee	Osteoarthritis of the hip or knee	EUR	Binary	378169	39427	417596	Tachmazidou	2019	http://www.nealelab.is/uk-biobank
30664745	30664745	Hip osteoarthritis	Hip osteoarthritis	EUR	Binary	378169	15704	393873	Tachmazidou	2019	http://www.nealelab.is/uk-biobank
34822786	34822786	Hip osteoarthritis	Hip osteoarthritis	EUR	Binary	316943	36445	353388	Boer	2021	https://msk.hugeamp.org/
34822786	34822786	Knee and/or hip osteoarthritis	Knee and/or hip osteoarthritis	EUR	Binary	400604	89741	490345	Boer	2021	https://msk.hugeamp.org/
34822786	34822786	Total hip replacement	Total hip replacement	EUR	Binary	296016	23021	319037	Boer	2021	https://msk.hugeamp.org/
34822786	34822786	Total joint replacement	Total joint replacement	EUR	Binary	327689	40887	368576	Boer	2021	https://msk.hugeamp.org/
31768069	31768069	Standing height	Standing height	EUR	Continue			455332	Jiang	2019	https://yanglab.westlake.edu.cn/resources/fastgwa_data/UKB/50.v1.1.fastGWA.gz
31768069	31768069	Neuroticism score	Neuroticism score	EUR	Continue			369407	Jiang	2019	https://yanglab.westlake.edu.cn/resources/fastgwa_data/UKB/20127.v1.1.fastGWA.gz
31768069	31768069	Interval between previous point and current one in alphanumeric path (trail #2)	Interval between previous point and current one in alphanumeric path (trail #2)	EUR	Continue			103957	Jiang	2019	https://yanglab.westlake.edu.cn/resources/fastgwa_data/UKB/20155.v1.1.fastGWA.gz
31768069	31768069	Duration to complete alphanumeric path (trail #2)	Duration to complete alphanumeric path (trail #2)	EUR	Continue			98075	Jiang	2019	https://yanglab.westlake.edu.cn/resources/fastgwa_data/UKB/20157.v1.1.fastGWA.gz
31768069	31768069	Body mass index (BMI)	Body mass index (BMI)	EUR	Continue			454841	Jiang	2019	https://yanglab.westlake.edu.cn/resources/fastgwa_data/UKB/21001.v1.1.fastGWA.gz
31768069	31768069	Impedance of leg (right)	Impedance of leg (right)	EUR	Continue			448338	Jiang	2019	https://yanglab.westlake.edu.cn/resources/fastgwa_data/UKB/23107.v1.1.fastGWA.gz
31768069	31768069	Impedance of leg (left)	Impedance of leg (left)	EUR	Continue			448332	Jiang	2019	https://yanglab.westlake.edu.cn/resources/fastgwa_data/UKB/23108.v1.1.fastGWA.gz
31768069	31768069	Red blood cell (erythrocyte) count	Red blood cell (erythrocyte) count	EUR	Continue			442728	Jiang	2019	https://yanglab.westlake.edu.cn/resources/fastgwa_data/UKB/30010.v1.1.fastGWA.gz
31768069	31768069	Haemoglobin concentration	Haemoglobin concentration	EUR	Continue			442728	Jiang	2019	https://yanglab.westlake.edu.cn/resources/fastgwa_data/UKB/30020.v1.1.fastGWA.gz
31768069	31768069	Haematocrit percentage	Haematocrit percentage	EUR	Continue			442728	Jiang	2019	https://yanglab.westlake.edu.cn/resources/fastgwa_data/UKB/30030.v1.1.fastGWA.gz
31768069	31768069	Red blood cell (erythrocyte) distribution width	Red blood cell (erythrocyte) distribution width	EUR	Continue			442726	Jiang	2019	https://yanglab.westlake.edu.cn/resources/fastgwa_data/UKB/30070.v1.1.fastGWA.gz
31768069	31768069	Platelet count	Platelet count	EUR	Continue			442725	Jiang	2019	https://yanglab.westlake.edu.cn/resources/fastgwa_data/UKB/30080.v1.1.fastGWA.gz
31768069	31768069	Platelet crit	Platelet crit	EUR	Continue			442721	Jiang	2019	https://yanglab.westlake.edu.cn/resources/fastgwa_data/UKB/30090.v1.1.fastGWA.gz
31768069	31768069	Platelet distribution width	Platelet distribution width	EUR	Continue			442720	Jiang	2019	https://yanglab.westlake.edu.cn/resources/fastgwa_data/UKB/30110.v1.1.fastGWA.gz
31768069	31768069	Monocyte percentage	Monocyte percentage	EUR	Continue			441944	Jiang	2019	https://yanglab.westlake.edu.cn/resources/fastgwa_data/UKB/30190.v1.1.fastGWA.gz
31768069	31768069	Mean sphered cell volume	Mean sphered cell volume	EUR	Continue			435491	Jiang	2019	https://yanglab.westlake.edu.cn/resources/fastgwa_data/UKB/30270.v1.1.fastGWA.gz
30867560	30867560	Neuroticism	Neuroticism	EUR	Continue			270059	Hill	2019	https://ngdc.cncb.ac.cn/braincatalog
30643256	30643256	Depression symptoms	Depression symptoms	EUR	Continue			1067913	Baselmans	2019	https://tweelingenregister.vu.nl/gpc
31844048	31844048	Household income	Household income	EUR	Continue			505541	Hill WD	2019	https://ngdc.cncb.ac.cn/braincatalog
30643256	30643256	Neuroticism	Neuroticism	EUR	Continue			523783	Baselmans	2019	https://tweelingenregister.vu.nl/gpc
30643256	30643256	Positive affect	Positive affect	EUR	Continue			410603	Baselmans	2019	https://tweelingenregister.vu.nl/gpc
30952852	30952852	Sleep efficiency	Sleep efficiency	EUR	Continue			84810	Jones	2019	https://www.kp4cd.org/dataset_downloads/sleep
30643256	30643256	Well being spectrum	Well being spectrum	EUR	Continue			2083151	Baselmans	2019	https://tweelingenregister.vu.nl/gpc
30867560	30867560	Neuroticism	Neuroticism	EUR	Continue			270059	Hill	2019	https://ngdc.cncb.ac.cn/braincatalog
30643258	30643258	Automobile speeding propensity	Automobile speeding propensity	EUR	Continue			404291	Richard Karlsson Linn鑼卹	2019	https://tweelingenregister.vu.nl/gpc
30239722	30239722	Body mass index	Body mass index	EUR	Continue			806834	Sara L Pulit	2019	https://ngdc.cncb.ac.cn/braincatalog
30124842	30124842	Body mass index	Body mass index	EUR	Continue			681275	Loic Yengo	2018	https://cnsgenomics.com/content/data
30038396	30038396	Cognitive performance	Cognitive performance	EUR	Continue			257828	James J Lee	2018	https://www.thessgac.org/
34910505	34910505	Cortical thickness	Cortical thickness	EUR	Continue			33748	Van	2021	https://ngdc.cncb.ac.cn/braincatalog
30124842	30124842	Height	Height	EUR	Continue			681275	Loic Yengo	2018	https://cnsgenomics.com/content/data
29942086	29942086	Intelligence	Intelligence	EUR	Continue			269867	Jeanne E Savage	2018	https://ctg.cncr.nl/software/summary_statistics
30643258	30643258	The first PC of the four risky behaviors	The first PC of the four risky behaviors	EUR	Continue			315894	Richard Karlsson Linn茅r	2019	https://tweelingenregister.vu.nl/gpc
30239722	30239722	Waist-to-hip ratio adjusted for body mass index	Waist-to-hip ratio adjusted for body mass index	EUR	Continue			694649	Sara L Pulit	2019	https://ngdc.cncb.ac.cn/braincatalog
25673412	25673412	Waist-to-hip ratio adjusted for body mass index	Waist-to-hip ratio adjusted for body mass index	EUR	Continue			142762	Dmitry Shungin	2015	https://portals.broadinstitute.org/collaboration/giant/index.php/GIANT_consortium_data_files
30239722	30239722	Waist-hip ratio	Waist-hip ratio	EUR	Continue			697734	Sara L Pulit	2019	https://ngdc.cncb.ac.cn/braincatalog
29942085	29942085	Worry subcluster	Worry subcluster	EUR	Continue			348219	Mats Nagel	2018	https://ctg.cncr.nl/software/summary_statistics
32888493	32888493	hematocrit	hematocrit	EUR	Continue			563946	Chen	2021	http://www.mhi-humangenetics.org/en/resources/
32888493	32888493	hemoglobin concentration	hemoglobin concentration	EUR	Continue			563946	Chen	2021	http://www.mhi-humangenetics.org/en/resources/
32888493	32888493	platelet count	platelet count	EUR	Continue			563946	Chen	2021	http://www.mhi-humangenetics.org/en/resources/
32888493	32888493	red blood cell count	red blood cell count	EUR	Continue			563946	Chen	2021	http://www.mhi-humangenetics.org/en/resources/
32888493	32888493	RBC distribution width	RBC distribution width	EUR	Continue			563946	Chen	2021	http://www.mhi-humangenetics.org/en/resources/
32242144	32242144	25 hydroxyvitamin D conditioned on BMI with mtCOJO	25 hydroxyvitamin D conditioned on BMI with mtCOJO	EUR	Continue			417580	Revez	2020	https://cnsgenomics.com/content/data
32242144	32242144	25 hydroxyvitamin D with BMI as covariate	25 hydroxyvitamin D with BMI as covariate	EUR	Continue			417580	Revez	2020	https://cnsgenomics.com/content/data
32242144	32242144	meta-analysis between the UKB 25OHD GWAS and the SUNLIGHT consortium GWAS	meta-analysis between the UKB 25OHD GWAS and the SUNLIGHT consortium GWAS	EUR	Continue			417580	Revez	2020	https://cnsgenomics.com/content/data
34349265	34349265	Age at Natural Menopause	Age at Natural Menopause	EUR	Continue			200000	Katherine	2021	http://www.reprogen.org/data_download.html
31768069	31768069	Frequency of stair climbing in last 4 weeks	Frequency of stair climbing in last 4 weeks	EUR	Ordered_Categorical			451822	Jiang	2019	https://yanglab.westlake.edu.cn/resources/fastgwa_data/UKB/943.v1.1.fastGWA.gz
31768069	31768069	Time spent watching television (TV)	Time spent watching television (TV)	EUR	Ordered_Categorical			431882	Jiang	2019	https://yanglab.westlake.edu.cn/resources/fastgwa_data/UKB/1070.v1.1.fastGWA.gz
31768069	31768069	Age when periods started (menarche)	Age when periods started (menarche)	EUR	Ordered_Categorical			240378	Jiang	2019	https://yanglab.westlake.edu.cn/resources/fastgwa_data/UKB/2714.v1.1.fastGWA.gz
