# Supplementary material for: Integrative Genomics Establishes GNL3 as a Pleiotropic Hub and Causal Gene for Osteoarthritis
Source: Research Square preprint supplement (doi:10.21203/rs.3.rs-7630649/v1), 2025-09-29
Supplement: Supplementary file 5 [file 5f884f3002e9c8a41ab37588.xlsx]

## Sheet: mr results
id.exposure	id.outcome	outcome	exposure	method	nsnp	b	se	pval	lo_ci	up_ci	or	or_lci95	or_uci95	p_fdr
ebi-a-GCST90001391	ukb-saige-740.1	Osteoarthritis; localized || id:ukb-saige-740.1	IgD+ B cell %B cell || id:ebi-a-GCST90001391	Wald ratio	1	-0.0278859	0.0778210116731518	0.720094	-0.180415	0.124643320363165	0.972499359096768	0.834923608288943	1.13274435415932	1
ebi-a-GCST90001392	ukb-saige-740.1	Osteoarthritis; localized || id:ukb-saige-740.1	IgD+ CD38+ B cell Absolute Count || id:ebi-a-GCST90001392	Inverse variance weighted	2	0.0769662695947984	0.0907974948903262	0.396622	-0.100997	0.254929359579838	1.08000564675013	0.903935907044726	1.29037046534146	1
ebi-a-GCST90001392	ukb-saige-740.1	Osteoarthritis; localized || id:ukb-saige-740.1	IgD+ CD38+ B cell Absolute Count || id:ebi-a-GCST90001392	Bayesian Weighted Mendelian Randomization	2	0.0458772165261507	0.10621409915981	0.665791	-0.162302	0.254056850879378	1.04694585541579	0.850184054844385	1.2892450969019	1
ebi-a-GCST90001395	ukb-saige-740.1	Osteoarthritis; localized || id:ukb-saige-740.1	IgD+ CD38- B cell %B cell || id:ebi-a-GCST90001395	Inverse variance weighted	2	0.0282177872254664	0.0656098307794815	0.667134	-0.100377	0.15681305555325	1.02861968025505	0.904495923467909	1.16977691016153	1
ebi-a-GCST90001395	ukb-saige-740.1	Osteoarthritis; localized || id:ukb-saige-740.1	IgD+ CD38- B cell %B cell || id:ebi-a-GCST90001395	Bayesian Weighted Mendelian Randomization	2	0.0284605656124021	0.0677091354347965	0.67424	-0.104249	0.161170471064603	1.02886943719836	0.901000614062343	1.17488523568045	1
ebi-a-GCST90001396	ukb-saige-740.1	Osteoarthritis; localized || id:ukb-saige-740.1	IgD+ CD38- B cell Absolute Count || id:ebi-a-GCST90001396	Wald ratio	1	0.0557448126354909	0.126974295447507	0.660644	-0.193125	0.304614431712605	1.05732783260375	0.824379079898799	1.35610203225412	1
ebi-a-GCST90001397	ukb-saige-740.1	Osteoarthritis; localized || id:ukb-saige-740.1	Unswitched memory B cell %B cell || id:ebi-a-GCST90001397	Wald ratio	1	-0.252207	0.234192037470726	0.281515	-0.711223	0.206809583858764	0.777084013028422	0.491043184446086	1.22974838554277	1
ebi-a-GCST90001399	ieu-a-1169	Hip osteoarthritis || id:ieu-a-1169	IgD- CD27- B cell %B cell || id:ebi-a-GCST90001399	Inverse variance weighted	2	-0.258044	0.190733206470442	0.176086	-0.631881	0.115793426632671	0.772561502842404	0.531591074198133	1.12276391505335	1
ebi-a-GCST90001399	ieu-a-1169	Hip osteoarthritis || id:ieu-a-1169	IgD- CD27- B cell %B cell || id:ebi-a-GCST90001399	Bayesian Weighted Mendelian Randomization	2	-0.269051	0.184439768508687	0.144635	-0.630553	0.0924508577537927	0.764104217694933	0.532297340637528	1.09685923810911	1
ebi-a-GCST90001399	ieu-a-1170	Knee and hip osteoarthritis || id:ieu-a-1170	IgD- CD27- B cell %B cell || id:ebi-a-GCST90001399	Inverse variance weighted	2	-0.108534	0.0851578167426329	0.202485	-0.275443	0.0583753517789956	0.897148419031907	0.759235487229958	1.06011283627957	1
ebi-a-GCST90001399	ieu-a-1170	Knee and hip osteoarthritis || id:ieu-a-1170	IgD- CD27- B cell %B cell || id:ebi-a-GCST90001399	Bayesian Weighted Mendelian Randomization	2	-0.11626	0.0805565102791609	0.148963	-0.27415	0.041631167239804	0.890244092246621	0.760217765604545	1.04250989602929	1
ebi-a-GCST90001401	ieu-a-1169	Hip osteoarthritis || id:ieu-a-1169	IgD- CD27- B cell Absolute Count || id:ebi-a-GCST90001401	Wald ratio	1	0.224129506990434	0.212003679175865	0.290422	-0.191398	0.639656718175129	1.25123305236288	0.825804097081339	1.89582996361802	1
ebi-a-GCST90001401	ieu-a-1170	Knee and hip osteoarthritis || id:ieu-a-1170	IgD- CD27- B cell Absolute Count || id:ebi-a-GCST90001401	Wald ratio	1	0.073953642384106	0.151769683590876	0.626063	-0.223515	0.371422222222222	1.07675688845696	0.799702946252396	1.44979507987657	1
ebi-a-GCST90001401	ukb-saige-740.1	Osteoarthritis; localized || id:ukb-saige-740.1	IgD- CD27- B cell Absolute Count || id:ebi-a-GCST90001401	Inverse variance weighted	2	0.0204655155633271	0.0398338289231627	0.607411	-0.0576088	0.0985398202527261	1.02067637018665	0.944019185777735	1.10355834749177	1
ebi-a-GCST90001401	ukb-saige-740.1	Osteoarthritis; localized || id:ukb-saige-740.1	IgD- CD27- B cell Absolute Count || id:ebi-a-GCST90001401	Bayesian Weighted Mendelian Randomization	2	0.0205874441068954	0.0403958631634043	0.610302	-0.0585884	0.0997633359071678	1.02080082735721	0.94309482214899	1.10490939475071	1
ebi-a-GCST90001404	ukb-saige-740.1	Osteoarthritis; localized || id:ukb-saige-740.1	Plasma Blast-Plasma Cell %B cell || id:ebi-a-GCST90001404	Wald ratio	1	0.183927560837578	0.130164119977363	0.157643	-0.0711941	0.439049235993209	1.20192875323053	0.931281099585387	1.55123166193908	1
ebi-a-GCST90001406	ukb-saige-740.1	Osteoarthritis; localized || id:ukb-saige-740.1	Memory B cell %B cell || id:ebi-a-GCST90001406	Inverse variance weighted	2	0.0155203473212334	0.0880349178725041	0.86006	-0.157028	0.188068786351341	1.01564141343016	0.85468004905733	1.20691653187897	1
ebi-a-GCST90001406	ukb-saige-740.1	Osteoarthritis; localized || id:ukb-saige-740.1	Memory B cell %B cell || id:ebi-a-GCST90001406	Bayesian Weighted Mendelian Randomization	2	0.0158938658208232	0.09121685140981	0.861675	-0.162891	0.194678894584051	1.01602	0.849683660451797	1.21492080619776	1
ebi-a-GCST90001407	ukb-saige-740.1	Osteoarthritis; localized || id:ukb-saige-740.1	Memory B cell Absolute Count || id:ebi-a-GCST90001407	Wald ratio	1	0.109826589595376	0.144508670520231	0.447255	-0.17341	0.393063583815029	1.11608451300992	0.840792478905374	1.48151258655679	1
ebi-a-GCST90001408	ukb-saige-740.1	Osteoarthritis; localized || id:ukb-saige-740.1	Naive-mature B cell %B cell || id:ebi-a-GCST90001408	Wald ratio	1	-0.0794351	0.18240659017358	0.663211	-0.436952	0.2780817887614	0.923637936284907	0.646002409894898	1.32059420255636	1
ebi-a-GCST90001410	ukb-saige-740.1	Osteoarthritis; localized || id:ukb-saige-740.1	IgD- CD38+ B cell %B cell || id:ebi-a-GCST90001410	Wald ratio	1	-0.0326937	0.07818052594172	0.675814	-0.185928	0.120540156361052	0.967834986736133	0.830333787573598	1.1281060406897	1
ebi-a-GCST90001412	ukb-saige-740.1	Osteoarthritis; localized || id:ukb-saige-740.1	IgD+ CD24+ B cell Absolute Count || id:ebi-a-GCST90001412	Wald ratio	1	0.0967906265919511	0.127356087620988	0.447255	-0.152827	0.346408558329088	1.10162969750896	0.858277929196072	1.41398019120731	1
ebi-a-GCST90001415	ukb-saige-740.1	Osteoarthritis; localized || id:ukb-saige-740.1	IgD+ CD24- B cell %B cell || id:ebi-a-GCST90001415	Wald ratio	1	0.0227743271221532	0.0745341614906832	0.759943	-0.123313	0.168861283643892	1.02303564209706	0.883987258951117	1.18395589348513	1
ebi-a-GCST90001418	ukb-saige-740.1	Osteoarthritis; localized || id:ukb-saige-740.1	CD24+ CD27+ B cell Absolute Count || id:ebi-a-GCST90001418	Wald ratio	1	0.112359550561798	0.147841513897102	0.447255	-0.17741	0.402128917800118	1.11891509487991	0.837436518738868	1.49500405288691	1
ebi-a-GCST90001422	ukb-saige-740.1	Osteoarthritis; localized || id:ukb-saige-740.1	CD20- CD38- B cell %B cell || id:ebi-a-GCST90001422	Wald ratio	1	0.0311451844753234	0.0574988021082894	0.588048	-0.0815525	0.143842836607571	1.03163527043983	0.921684349966967	1.15470261728282	1
ebi-a-GCST90001424	ukb-saige-740.1	Osteoarthritis; localized || id:ukb-saige-740.1	IgD+ B cell %Lymphocyte || id:ebi-a-GCST90001424	Inverse variance weighted	2	0.0568984786130341	0.065130394612427	0.382331	-0.0707571	0.184554052053391	1.05854833964469	0.931688176521054	1.20268198695898	1
ebi-a-GCST90001424	ukb-saige-740.1	Osteoarthritis; localized || id:ukb-saige-740.1	IgD+ B cell %Lymphocyte || id:ebi-a-GCST90001424	Bayesian Weighted Mendelian Randomization	2	0.0579171302361676	0.0674965723363972	0.390851	-0.0743762	0.190210412015506	1.05962718101751	0.928322438241184	1.20950406507291	1
ebi-a-GCST90001426	ieu-a-1169	Hip osteoarthritis || id:ieu-a-1169	IgD- CD38dim B cell %lymphocyte || id:ebi-a-GCST90001426	Wald ratio	1	-0.21633	0.206750710227273	0.295409	-0.621561	0.188901846590909	0.805469819213885	0.537105394966031	1.20792238496409	1
ebi-a-GCST90001426	ieu-a-1170	Knee and hip osteoarthritis || id:ieu-a-1170	IgD- CD38dim B cell %lymphocyte || id:ebi-a-GCST90001426	Wald ratio	1	-0.07138	0.146487926136364	0.626063	-0.358496	0.215736363636364	0.931108030303547	0.698726206356751	1.24077522240965	1
ebi-a-GCST90001426	ukb-saige-740.1	Osteoarthritis; localized || id:ukb-saige-740.1	IgD- CD38dim B cell %lymphocyte || id:ebi-a-GCST90001426	Inverse variance weighted	2	-0.168618	0.0555756962094436	0.00241318	-0.277546	-0.0596894	0.84483173711873	0.75764058830726	0.942057058529175	0.322159619538634
ebi-a-GCST90001426	ukb-saige-740.1	Osteoarthritis; localized || id:ukb-saige-740.1	IgD- CD38dim B cell %lymphocyte || id:ebi-a-GCST90001426	Bayesian Weighted Mendelian Randomization	2	-0.171561	0.0613078066737651	0.00513648	-0.291724	-0.0513972	0.842349269591771	0.746974790303869	0.949901256631627	0.999307653531375
ebi-a-GCST90001429	ukb-saige-740.1	Osteoarthritis; localized || id:ukb-saige-740.1	IgD+ CD38+ B cell %lymphocyte || id:ebi-a-GCST90001429	Wald ratio	1	-0.0722825	0.133444537114262	0.588048	-0.333834	0.189268835140395	0.93026809740079	0.716172835815701	1.20836575999985	1
ebi-a-GCST90001431	ukb-saige-740.1	Osteoarthritis; localized || id:ukb-saige-740.1	IgD+ CD38- B cell %lymphocyte || id:ebi-a-GCST90001431	Inverse variance weighted	2	0.0741861282976174	0.0908278110610446	0.414055	-0.103836	0.252208637977265	1.07700724836726	0.901372766722881	1.2868644980842	1
ebi-a-GCST90001431	ukb-saige-740.1	Osteoarthritis; localized || id:ukb-saige-740.1	IgD+ CD38- B cell %lymphocyte || id:ebi-a-GCST90001431	Bayesian Weighted Mendelian Randomization	2	0.0763909054983302	0.0944883497900678	0.418821	-0.108806	0.261588071086863	1.07938442900733	0.896904166798977	1.29899134011339	1
ebi-a-GCST90001433	ieu-a-1169	Hip osteoarthritis || id:ieu-a-1169	IgD- CD27- B cell %lymphocyte || id:ebi-a-GCST90001433	Wald ratio	1	-0.413338	0.0989520504731861	2.95E-05	-0.607284	-0.219392	0.66143898340491	0.544828856525071	0.803007262790951	0.0394071459051854
ebi-a-GCST90001433	ieu-a-1170	Knee and hip osteoarthritis || id:ieu-a-1170	IgD- CD27- B cell %lymphocyte || id:ebi-a-GCST90001433	Wald ratio	1	-0.183814	0.083192429022082	0.02714	-0.346871	-0.0207564	0.832090920512987	0.706896706032646	0.979457527657759	0.842601455807992
ebi-a-GCST90001433	ukb-saige-740.1	Osteoarthritis; localized || id:ukb-saige-740.1	IgD- CD27- B cell %lymphocyte || id:ebi-a-GCST90001433	Inverse variance weighted	2	-0.00414472	0.0699953604355752	0.952782	-0.141336	0.133046188984988	0.995863860018197	0.868197874817586	1.14230275891739	1
ebi-a-GCST90001433	ukb-saige-740.1	Osteoarthritis; localized || id:ukb-saige-740.1	IgD- CD27- B cell %lymphocyte || id:ebi-a-GCST90001433	Bayesian Weighted Mendelian Randomization	2	-0.0602357	0.109543065130638	0.582401	-0.27494	0.154468695868176	0.941542574742465	0.759617608187904	1.16703774438228	1
ebi-a-GCST90001434	ieu-a-1169	Hip osteoarthritis || id:ieu-a-1169	Switched memory B cell %lymphocyte || id:ebi-a-GCST90001434	Wald ratio	1	-0.211964	0.202578288100209	0.295409	-0.609017	0.185089631176061	0.808993971696908	0.543885105163312	1.20332629084486	1
ebi-a-GCST90001434	ieu-a-1170	Knee and hip osteoarthritis || id:ieu-a-1170	Switched memory B cell %lymphocyte || id:ebi-a-GCST90001434	Wald ratio	1	-0.0699395	0.143531663187196	0.626063	-0.351262	0.211382602644398	0.932450271345019	0.703799674172518	1.23538492619176	1
ebi-a-GCST90001435	ieu-a-1169	Hip osteoarthritis || id:ieu-a-1169	Plasma Blast-Plasma Cell %lymphocyte || id:ebi-a-GCST90001435	Wald ratio	1	-0.0716344	0.220665716322167	0.745462	-0.504139	0.360870449037776	0.930871202035567	0.604025321480493	1.43457759793126	1
ebi-a-GCST90001435	ieu-a-1170	Knee and hip osteoarthritis || id:ieu-a-1170	Plasma Blast-Plasma Cell %lymphocyte || id:ebi-a-GCST90001435	Wald ratio	1	0.0709218104062723	0.162937990021383	0.663367	-0.248437	0.390280270848182	1.07349728627012	0.780019273463148	1.47739480655762	1
ebi-a-GCST90001435	ieu-a-1171	Knee osteoarthritis || id:ieu-a-1171	Plasma Blast-Plasma Cell %lymphocyte || id:ebi-a-GCST90001435	Wald ratio	1	0.0709218104062723	0.216285816108339	0.742981	-0.352998	0.494842009978617	1.07349728627012	0.702578325113333	1.64023907717821	1
ebi-a-GCST90001435	ukb-saige-740.1	Osteoarthritis; localized || id:ukb-saige-740.1	Plasma Blast-Plasma Cell %lymphocyte || id:ebi-a-GCST90001435	Wald ratio	1	0.014967925873129	0.0926585887384177	0.871669	-0.166643	0.196578759800428	1.01508050627264	0.846501836360811	1.21723118598827	1
ebi-a-GCST90001436	ukb-saige-740.1	Osteoarthritis; localized || id:ukb-saige-740.1	Memory B cell %lymphocyte || id:ebi-a-GCST90001436	Inverse variance weighted	2	0.0301280902814667	0.0657155270986265	0.64662	-0.0986743	0.158930523394775	1.03058653361857	0.906037717662318	1.17225649944938	1
ebi-a-GCST90001436	ukb-saige-740.1	Osteoarthritis; localized || id:ukb-saige-740.1	Memory B cell %lymphocyte || id:ebi-a-GCST90001436	Bayesian Weighted Mendelian Randomization	2	0.0308372127709757	0.0677145505781798	0.648821	-0.101883	0.163557731904208	1.03131760488584	0.903134935620949	1.17769334370416	1
ebi-a-GCST90001437	ukb-saige-740.1	Osteoarthritis; localized || id:ukb-saige-740.1	Naive-mature B cell %lymphocyte || id:ebi-a-GCST90001437	Wald ratio	1	-0.0199435	0.0332391557254446	0.548506	-0.0850922	0.0452052517866046	0.980254062531453	0.918427565968997	1.04624258103099	1
ebi-a-GCST90001439	ukb-saige-740.1	Osteoarthritis; localized || id:ukb-saige-740.1	IgD+ CD24+ B cell %lymphocyte || id:ebi-a-GCST90001439	Inverse variance weighted	2	0.0614381052804668	0.0625289259150827	0.325827	-0.0611186	0.183994800074029	1.06336467783341	0.940711674621455	1.20200957271926	1
ebi-a-GCST90001439	ukb-saige-740.1	Osteoarthritis; localized || id:ukb-saige-740.1	IgD+ CD24+ B cell %lymphocyte || id:ebi-a-GCST90001439	Bayesian Weighted Mendelian Randomization	2	0.0621008003349868	0.0643776262294031	0.334729	-0.0640793	0.188280947744617	1.06406959789428	0.937930574530758	1.20717	1
ebi-a-GCST90001441	ukb-saige-740.1	Osteoarthritis; localized || id:ukb-saige-740.1	IgD+ CD24- B cell %lymphocyte || id:ebi-a-GCST90001441	Wald ratio	1	-0.0206612	0.034435261707989	0.548506	-0.0881543	0.046831955922865	0.979550822257441	0.91561961321474	1.04794589318195	1
ebi-a-GCST90001446	ukb-saige-740.1	Osteoarthritis; localized || id:ukb-saige-740.1	IgD- CD38- B cell Absolute Count || id:ebi-a-GCST90001446	Wald ratio	1	0.0334928229665072	0.0526315789473684	0.524539	-0.0696651	0.136650717703349	1.03406002221623	0.932706157219772	1.14642765169812	1
ebi-a-GCST90001451	ukb-saige-740.1	Osteoarthritis; localized || id:ukb-saige-740.1	CD62L- monocyte %monocyte || id:ebi-a-GCST90001451	Inverse variance weighted	4	0.000325082961258945	0.0366103872227066	0.992915	-0.0714313	0.0720814419177639	1.00032513580645	0.931060261586062	1.07474286962005	1
ebi-a-GCST90001451	ukb-saige-740.1	Osteoarthritis; localized || id:ukb-saige-740.1	CD62L- monocyte %monocyte || id:ebi-a-GCST90001451	Bayesian Weighted Mendelian Randomization	4	0.000196485693540578	0.0396755895225567	0.996049	-0.0775677	0.0779606411577517	1.00019650499812	0.925364403080933	1.08108010777129	1
ebi-a-GCST90001451	ukb-saige-740.1	Osteoarthritis; localized || id:ukb-saige-740.1	CD62L- monocyte %monocyte || id:ebi-a-GCST90001451	MR Egger	4	0.203176145586912	0.116720590564297	0.223862	-0.0255962	0.431948503092935	1.22528827836287	0.97472859394556	1.54025579470925	0.998524067790455
ebi-a-GCST90001451	ukb-saige-740.1	Osteoarthritis; localized || id:ukb-saige-740.1	CD62L- monocyte %monocyte || id:ebi-a-GCST90001451	Weighted median	4	0.00609985469557453	0.0325761759243014	0.851465	-0.0577495	0.0699491595072052	1.00611849669445	0.943886408443014	1.07245365579582	0.974299104969666
ebi-a-GCST90001451	ukb-saige-740.1	Osteoarthritis; localized || id:ukb-saige-740.1	CD62L- monocyte %monocyte || id:ebi-a-GCST90001451	Weighted mode	4	0.0294480669905606	0.0361455071372397	0.474902	-0.0413971	0.10029326097955	1.02988594900634	0.959448031563655	1.10549506910975	0.974498079964075
ebi-a-GCST90001452	ukb-saige-740.1	Osteoarthritis; localized || id:ukb-saige-740.1	CD11c+ CD62L- monocyte Absolute Count || id:ebi-a-GCST90001452	Wald ratio	1	-0.0359315	0.0939745715865119	0.7022	-0.220122	0.148258706467662	0.964706418135458	0.802421206254216	1.15981290865449	1
ebi-a-GCST90001457	ieu-a-1169	Hip osteoarthritis || id:ieu-a-1169	CD11c+ HLA DR++ monocyte %monocyte || id:ebi-a-GCST90001457	Wald ratio	1	-0.0635291	0.178451327433628	0.721839	-0.413294	0.286235524652339	0.938446831575084	0.661467995115233	1.33140599726203	1
ebi-a-GCST90001457	ieu-a-1170	Knee and hip osteoarthritis || id:ieu-a-1170	CD11c+ HLA DR++ monocyte %monocyte || id:ebi-a-GCST90001457	Wald ratio	1	-0.0635291	0.145956384323641	0.663373	-0.349604	0.222545436156764	0.938446831575084	0.704967490223049	1.24925257959721	1
ebi-a-GCST90001457	ieu-a-1171	Knee osteoarthritis || id:ieu-a-1171	CD11c+ HLA DR++ monocyte %monocyte || id:ebi-a-GCST90001457	Wald ratio	1	-0.0635291	0.178451327433628	0.721839	-0.413294	0.286235524652339	0.938446831575084	0.661467995115233	1.33140599726203	1
ebi-a-GCST90001457	ukb-saige-740.1	Osteoarthritis; localized || id:ukb-saige-740.1	CD11c+ HLA DR++ monocyte %monocyte || id:ebi-a-GCST90001457	Wald ratio	1	-0.189633	0.0695322376738306	0.00638602	-0.325917	-0.0533502	0.827262373027843	0.721865416420211	0.948047957777877	0.426267054120696
ebi-a-GCST90001458	ukb-saige-740.1	Osteoarthritis; localized || id:ukb-saige-740.1	Myeloid Dendritic Cell Absolute Count || id:ebi-a-GCST90001458	Inverse variance weighted	2	0.00867966381767308	0.0244510439208316	0.722604	-0.0392444	0.056603709902503	1.00871744131924	0.961515703044457	1.05823635869895	1
ebi-a-GCST90001458	ukb-saige-740.1	Osteoarthritis; localized || id:ukb-saige-740.1	Myeloid Dendritic Cell Absolute Count || id:ebi-a-GCST90001458	Bayesian Weighted Mendelian Randomization	2	0.00873762642938918	0.0245546167534268	0.721957	-0.0393894	0.0568646752661057	1.00877591091113	0.961376254785154	1.0585125577727	1
ebi-a-GCST90001459	ukb-saige-740.1	Osteoarthritis; localized || id:ukb-saige-740.1	Myeloid Dendritic Cell %Dendritic Cell || id:ebi-a-GCST90001459	Wald ratio	1	0.0140620006391818	0.0271652285075104	0.604705	-0.0391818	0.0673058485139022	1.01416133564032	0.961575833339454	1.06962257062534	1
ebi-a-GCST90001460	ieu-a-1169	Hip osteoarthritis || id:ieu-a-1169	Plasmacytoid Dendritic Cell Absolute Count || id:ebi-a-GCST90001460	Wald ratio	1	0.0513697986577181	0.182847186370676	0.778753	-0.307011	0.409750283944244	1.05271211283863	0.735642739324357	1.50644155549605	1
ebi-a-GCST90001460	ieu-a-1170	Knee and hip osteoarthritis || id:ieu-a-1170	Plasmacytoid Dendritic Cell Absolute Count || id:ebi-a-GCST90001460	Wald ratio	1	0.0513697986577181	0.130502323180176	0.693853	-0.204415	0.307154352090862	1.05271211283863	0.815124224403507	1.35955080138629	1
ebi-a-GCST90001460	ukb-saige-740.1	Osteoarthritis; localized || id:ukb-saige-740.1	Plasmacytoid Dendritic Cell Absolute Count || id:ebi-a-GCST90001460	Inverse variance weighted	2	-0.0388272	0.0465641592049455	0.40437	-0.130093	0.0524385571197108	0.961916918913226	0.878013818409316	1.0538378092589	1
ebi-a-GCST90001460	ukb-saige-740.1	Osteoarthritis; localized || id:ukb-saige-740.1	Plasmacytoid Dendritic Cell Absolute Count || id:ebi-a-GCST90001460	Bayesian Weighted Mendelian Randomization	2	-0.0392367	0.0476552036780851	0.410312	-0.132641	0.0541675427831912	0.961523131590883	0.875779566930991	1.0556614557978	1
ebi-a-GCST90001461	ukb-saige-740.1	Osteoarthritis; localized || id:ukb-saige-740.1	Dendritic Cell Absolute Count || id:ebi-a-GCST90001461	Inverse variance weighted	2	0.00616963452006445	0.0271688284284922	0.820358	-0.0470813	0.0594205382399092	1.00618870591613	0.954009862821685	1.06122143110632	1
ebi-a-GCST90001461	ukb-saige-740.1	Osteoarthritis; localized || id:ukb-saige-740.1	Dendritic Cell Absolute Count || id:ebi-a-GCST90001461	Bayesian Weighted Mendelian Randomization	2	0.00623343096663008	0.0273061932402378	0.819429	-0.0472867	0.0597535697174962	1.00625289922777	0.953813892516531	1.06157491010412	1
ebi-a-GCST90001463	ieu-a-1169	Hip osteoarthritis || id:ieu-a-1169	CD62L- Dendritic Cell %Dendritic Cell || id:ebi-a-GCST90001463	Wald ratio	1	-0.05691	0.175308040770102	0.745462	-0.400514	0.286693793884485	0.94467911875404	0.66997577368209	1.33201627949218	1
ebi-a-GCST90001463	ieu-a-1170	Knee and hip osteoarthritis || id:ieu-a-1170	CD62L- Dendritic Cell %Dendritic Cell || id:ebi-a-GCST90001463	Wald ratio	1	0.0563438844847112	0.128169309173273	0.660223	-0.194868	0.307555730464326	1.0579614377122	0.822943311087244	1.36009660520519	1
ebi-a-GCST90001463	ieu-a-1171	Knee osteoarthritis || id:ieu-a-1171	CD62L- Dendritic Cell %Dendritic Cell || id:ebi-a-GCST90001463	Wald ratio	1	0.112132502831257	0.155170441676104	0.469901	-0.192002	0.416266568516421	1.11866107658518	0.825305578658626	1.51629001018098	1
ebi-a-GCST90001463	ukb-saige-740.1	Osteoarthritis; localized || id:ukb-saige-740.1	CD62L- Dendritic Cell %Dendritic Cell || id:ebi-a-GCST90001463	Inverse variance weighted	4	0.00748398745302671	0.0201105492183134	0.709787	-0.0319327	0.0469006639209209	1.00751206248114	0.968571775405434	1.04801789791996	1
ebi-a-GCST90001463	ukb-saige-740.1	Osteoarthritis; localized || id:ukb-saige-740.1	CD62L- Dendritic Cell %Dendritic Cell || id:ebi-a-GCST90001463	Bayesian Weighted Mendelian Randomization	4	0.00752324946303897	0.0201862751674949	0.709378	-0.0320418	0.0470883487913289	1.00755162020638	0.968466051057358	1.04821461348301	1
ebi-a-GCST90001463	ukb-saige-740.1	Osteoarthritis; localized || id:ukb-saige-740.1	CD62L- Dendritic Cell %Dendritic Cell || id:ebi-a-GCST90001463	MR Egger	4	0.00790630660989623	0.034859263338091	0.841647	-0.0604179	0.0762304627525546	1.00793764398519	0.94137109991768	1.07921126349774	0.998524067790455
ebi-a-GCST90001463	ukb-saige-740.1	Osteoarthritis; localized || id:ukb-saige-740.1	CD62L- Dendritic Cell %Dendritic Cell || id:ebi-a-GCST90001463	Weighted median	4	0.00946213336034383	0.0210368876264036	0.652864	-0.0317702	0.0506944331080949	1.00950704087274	0.968729203027685	1.05200138737071	0.974299104969666
ebi-a-GCST90001463	ukb-saige-740.1	Osteoarthritis; localized || id:ukb-saige-740.1	CD62L- Dendritic Cell %Dendritic Cell || id:ebi-a-GCST90001463	Weighted mode	4	0.00981315111657115	0.0237738614558034	0.707502	-0.0367836	0.0564099195699459	1.00986145796883	0.963884680719667	1.05803130259266	0.974498079964075
ebi-a-GCST90001470	ukb-saige-740.1	Osteoarthritis; localized || id:ukb-saige-740.1	CD62L- plasmacytoid Dendritic Cell Absolute Count || id:ebi-a-GCST90001470	Wald ratio	1	-0.0393701	0.0429491768074445	0.359317	-0.12355	0.0448103078024338	0.961394851507315	0.883777040060469	1.04582945540374	1
ebi-a-GCST90001471	ukb-saige-740.1	Osteoarthritis; localized || id:ukb-saige-740.1	CD62L- plasmacytoid Dendritic Cell %Dendritic Cell || id:ebi-a-GCST90001471	Inverse variance weighted	2	-0.0314565	0.032429807631709	0.332053	-0.0950189	0.0321059452484705	0.969033130077204	0.909355746874894	1.03262690142367	1
ebi-a-GCST90001471	ukb-saige-740.1	Osteoarthritis; localized || id:ukb-saige-740.1	CD62L- plasmacytoid Dendritic Cell %Dendritic Cell || id:ebi-a-GCST90001471	Bayesian Weighted Mendelian Randomization	2	-0.0315929	0.0327590344118749	0.334845	-0.0958006	0.0326148389435771	0.968900971891948	0.908645203707172	1.03315253247702	1
ebi-a-GCST90001474	ukb-saige-740.1	Osteoarthritis; localized || id:ukb-saige-740.1	Plasmacytoid Dendritic Cell %Dendritic Cell || id:ebi-a-GCST90001474	Inverse variance weighted	2	-0.0211898	0.0264163112291342	0.422467	-0.0729658	0.0305861694666611	0.979033125915512	0.92963265029408	1.03105873200203	1
ebi-a-GCST90001474	ukb-saige-740.1	Osteoarthritis; localized || id:ukb-saige-740.1	Plasmacytoid Dendritic Cell %Dendritic Cell || id:ebi-a-GCST90001474	Bayesian Weighted Mendelian Randomization	2	-0.0212166	0.0265347531775994	0.423956	-0.0732247	0.0307915472773826	0.979006919107846	0.929391985960041	1.03127051033367	1
ebi-a-GCST90001475	ieu-a-1169	Hip osteoarthritis || id:ieu-a-1169	HLA DR++ monocyte %monocyte || id:ebi-a-GCST90001475	Wald ratio	1	0.0522636505460218	0.160995319812793	0.745462	-0.263287	0.367814477379095	1.05365350221718	0.768521164563512	1.44457401295523	1
ebi-a-GCST90001475	ieu-a-1170	Knee and hip osteoarthritis || id:ieu-a-1170	HLA DR++ monocyte %monocyte || id:ebi-a-GCST90001475	Wald ratio	1	0.0522636505460218	0.107256890275611	0.626063	-0.15796	0.26248715548622	1.05365350221718	0.853884060973333	1.30015976814118	1
ebi-a-GCST90001475	ieu-a-1171	Knee osteoarthritis || id:ieu-a-1171	HLA DR++ monocyte %monocyte || id:ebi-a-GCST90001475	Wald ratio	1	-0.0517438	0.145343213728549	0.721832	-0.336616	0.233128913156526	0.949572129587513	0.714182687403625	1.26254422739846	1
ebi-a-GCST90001475	ukb-saige-740.1	Osteoarthritis; localized || id:ukb-saige-740.1	HLA DR++ monocyte %monocyte || id:ebi-a-GCST90001475	Inverse variance weighted	2	0.023795909312141	0.0498320008624816	0.63299	-0.0738748	0.121466631002605	1.02408129110601	0.928787959319305	1.12915168663681	1
ebi-a-GCST90001475	ukb-saige-740.1	Osteoarthritis; localized || id:ukb-saige-740.1	HLA DR++ monocyte %monocyte || id:ebi-a-GCST90001475	Bayesian Weighted Mendelian Randomization	2	0.0241132690807722	0.0511401143473704	0.637274	-0.0761214	0.124347893201618	1.02440634488438	0.926703739565851	1.13240976013652	1
ebi-a-GCST90001478	ieu-a-1169	Hip osteoarthritis || id:ieu-a-1169	CD4 regulatory T cell %CD4+ T cell || id:ebi-a-GCST90001478	Wald ratio	1	0.268149562816383	0.220074551311551	0.223053	-0.163197	0.699495683387023	1.30754268515796	0.849424211089441	2.01273739456677	1
ebi-a-GCST90001478	ieu-a-1170	Knee and hip osteoarthritis || id:ieu-a-1170	CD4 regulatory T cell %CD4+ T cell || id:ebi-a-GCST90001478	Wald ratio	1	0.354169351127474	0.162558214450069	0.0293522	0.0355552508053383	0.672783451449609	1.4249964908091	1.03619489714908	1.95968442269417	0.890573589275716
ebi-a-GCST90001478	ieu-a-1171	Knee osteoarthritis || id:ieu-a-1171	CD4 regulatory T cell %CD4+ T cell || id:ebi-a-GCST90001478	Wald ratio	1	0.438611136677405	0.212099861942016	0.0386451	0.0228954072710538	0.854326866083755	1.55055221725233	1.0231595189043	2.3497921233248	0.900659323502345
ebi-a-GCST90001478	ukb-saige-740.1	Osteoarthritis; localized || id:ukb-saige-740.1	CD4 regulatory T cell %CD4+ T cell || id:ebi-a-GCST90001478	Inverse variance weighted	2	0.00157822829082051	0.0547355916973323	0.976997	-0.105704	0.108859988017592	1.00157947434852	0.899691338740555	1.11500622518002	1
ebi-a-GCST90001478	ukb-saige-740.1	Osteoarthritis; localized || id:ukb-saige-740.1	CD4 regulatory T cell %CD4+ T cell || id:ebi-a-GCST90001478	Bayesian Weighted Mendelian Randomization	2	0.00159815897891524	0.0561518327213431	0.977294	-0.108459	0.111655751112748	1.00159943671556	0.897215291272448	1.11812788010575	1
ebi-a-GCST90001479	ukb-saige-740.1	Osteoarthritis; localized || id:ukb-saige-740.1	CD4 regulatory T cell %T cell || id:ebi-a-GCST90001479	Wald ratio	1	0.00180136319376826	0.0827653359298929	0.982636	-0.160419	0.164021421616358	1.0018029866231	0.851787075109907	1.1782395546181	1
ebi-a-GCST90001480	ieu-a-1169	Hip osteoarthritis || id:ieu-a-1169	Resting CD4 regulatory T cell Absolute Count || id:ebi-a-GCST90001480	Inverse variance weighted	2	-0.124626	0.116553636685912	0.284952	-0.353071	0.103818761984451	0.882826695109977	0.702526965242325	1.10939937135362	1
ebi-a-GCST90001480	ieu-a-1169	Hip osteoarthritis || id:ieu-a-1169	Resting CD4 regulatory T cell Absolute Count || id:ebi-a-GCST90001480	Bayesian Weighted Mendelian Randomization	2	-0.125928	0.119333841120599	0.291307	-0.359822	0.107966219019428	0.881678228725972	0.697800217752811	1.11401011239687	1
ebi-a-GCST90001480	ieu-a-1170	Knee and hip osteoarthritis || id:ieu-a-1170	Resting CD4 regulatory T cell Absolute Count || id:ebi-a-GCST90001480	Inverse variance weighted	2	-0.0374078	0.085283862155169	0.660932	-0.204564	0.129748566786905	0.963283225414533	0.815002439200782	1.13854208003962	1
ebi-a-GCST90001480	ieu-a-1170	Knee and hip osteoarthritis || id:ieu-a-1170	Resting CD4 regulatory T cell Absolute Count || id:ebi-a-GCST90001480	Bayesian Weighted Mendelian Randomization	2	-0.0377681	0.0867047503085623	0.663131	-0.207709	0.132173165562338	0.962936176537394	0.812443053164702	1.14130593704083	1
ebi-a-GCST90001480	ieu-a-1171	Knee osteoarthritis || id:ieu-a-1171	Resting CD4 regulatory T cell Absolute Count || id:ebi-a-GCST90001480	Inverse variance weighted	2	0.0628585754120694	0.105207344319831	0.550191	-0.143348	0.269064970278939	1.06487622889969	0.866452647390971	1.30874016749808	1
ebi-a-GCST90001480	ieu-a-1171	Knee osteoarthritis || id:ieu-a-1171	Resting CD4 regulatory T cell Absolute Count || id:ebi-a-GCST90001480	Bayesian Weighted Mendelian Randomization	2	0.0634456345811944	0.107209411818509	0.55399	-0.146685	0.273576081745472	1.06550155778841	0.86356611970076	1.31465737683518	1
ebi-a-GCST90001481	ieu-a-1169	Hip osteoarthritis || id:ieu-a-1169	Resting CD4 regulatory T cell %CD4 regulatory T cell || id:ebi-a-GCST90001481	Inverse variance weighted	2	-0.0658087	0.0900270982755857	0.464787	-0.242262	0.110644406813971	0.936309957819847	0.784850662283863	1.11699763947645	1
ebi-a-GCST90001481	ieu-a-1169	Hip osteoarthritis || id:ieu-a-1169	Resting CD4 regulatory T cell %CD4 regulatory T cell || id:ebi-a-GCST90001481	Bayesian Weighted Mendelian Randomization	2	-0.0661895	0.0910806867723156	0.467402	-0.244708	0.112328668003412	0.935953504825275	0.782933415608658	1.11888054045273	1
ebi-a-GCST90001481	ieu-a-1170	Knee and hip osteoarthritis || id:ieu-a-1170	Resting CD4 regulatory T cell %CD4 regulatory T cell || id:ebi-a-GCST90001481	Inverse variance weighted	2	-0.0234493	0.065283639714477	0.719452	-0.151405	0.104506596775572	0.976823462159005	0.859499298007147	1.11016271733636	1
ebi-a-GCST90001481	ieu-a-1170	Knee and hip osteoarthritis || id:ieu-a-1170	Resting CD4 regulatory T cell %CD4 regulatory T cell || id:ebi-a-GCST90001481	Bayesian Weighted Mendelian Randomization	2	-0.0237095	0.0659984285380351	0.719414	-0.153066	0.105647466953037	0.976569407871897	0.858072767129544	1.11142999163297	1
ebi-a-GCST90001481	ieu-a-1171	Knee osteoarthritis || id:ieu-a-1171	Resting CD4 regulatory T cell %CD4 regulatory T cell || id:ebi-a-GCST90001481	Inverse variance weighted	2	0.0300173576475957	0.0808907719938194	0.710574	-0.128529	0.188563270755482	1.03047242037541	0.879388450717895	1.2075134808599	1
ebi-a-GCST90001481	ieu-a-1171	Knee osteoarthritis || id:ieu-a-1171	Resting CD4 regulatory T cell %CD4 regulatory T cell || id:ebi-a-GCST90001481	Bayesian Weighted Mendelian Randomization	2	0.030228632044877	0.0817608723419914	0.711591	-0.130023	0.19047994183518	1.0306901558151	0.878075517921711	1.20983010642242	1
ebi-a-GCST90001482	ieu-a-1169	Hip osteoarthritis || id:ieu-a-1169	Resting CD4 regulatory T cell %CD4+ T cell || id:ebi-a-GCST90001482	Inverse variance weighted	2	-0.098229	0.0918336466513258	0.284781	-0.278223	0.0817649561180442	0.906441312795155	0.757128009521733	1.08520071006331	1
ebi-a-GCST90001482	ieu-a-1169	Hip osteoarthritis || id:ieu-a-1169	Resting CD4 regulatory T cell %CD4+ T cell || id:ebi-a-GCST90001482	Bayesian Weighted Mendelian Randomization	2	-0.0988423	0.0931658964053728	0.288723	-0.281447	0.0837628499157696	0.905885548535473	0.754690563062299	1.08737099310684	1
ebi-a-GCST90001482	ieu-a-1170	Knee and hip osteoarthritis || id:ieu-a-1170	Resting CD4 regulatory T cell %CD4+ T cell || id:ebi-a-GCST90001482	Inverse variance weighted	2	-0.0294651	0.0671981120954398	0.661038	-0.161173	0.10224320287195	0.970964766793128	0.851144472802529	1.10765282332082	1
ebi-a-GCST90001482	ieu-a-1170	Knee and hip osteoarthritis || id:ieu-a-1170	Resting CD4 regulatory T cell %CD4+ T cell || id:ebi-a-GCST90001482	Bayesian Weighted Mendelian Randomization	2	-0.0296354	0.0678762354654406	0.662395	-0.162673	0.103402010931748	0.970799412228518	0.849869192860284	1.1089371243254	1
ebi-a-GCST90001482	ieu-a-1171	Knee osteoarthritis || id:ieu-a-1171	Resting CD4 regulatory T cell %CD4+ T cell || id:ebi-a-GCST90001482	Inverse variance weighted	2	0.0495488133171972	0.0828980630959635	0.550035	-0.112931	0.212029016985286	1.05079688384456	0.893211940971612	1.23618375488391	1
ebi-a-GCST90001482	ieu-a-1171	Knee osteoarthritis || id:ieu-a-1171	Resting CD4 regulatory T cell %CD4+ T cell || id:ebi-a-GCST90001482	Bayesian Weighted Mendelian Randomization	2	0.0498247038004364	0.0838559040328841	0.552398	-0.114533	0.214182275704889	1.0510868286993	0.891782626732283	1.23884844618846	1
ebi-a-GCST90001483	ukb-saige-740.1	Osteoarthritis; localized || id:ukb-saige-740.1	CD39+ resting CD4 regulatory T cell Absolute Count || id:ebi-a-GCST90001483	Inverse variance weighted	10	-0.00323997	0.0137472608518716	0.81368	-0.0301846	0.0237046576332535	0.99676526941419	0.970266401076804	1.02398784623245	1
ebi-a-GCST90001483	ukb-saige-740.1	Osteoarthritis; localized || id:ukb-saige-740.1	CD39+ resting CD4 regulatory T cell Absolute Count || id:ebi-a-GCST90001483	Bayesian Weighted Mendelian Randomization	10	-0.00309792	0.0150716992228687	0.837146	-0.0326385	0.0264426083770872	0.996906871509579	0.9678884339066	1.02679531612103	1
ebi-a-GCST90001483	ukb-saige-740.1	Osteoarthritis; localized || id:ukb-saige-740.1	CD39+ resting CD4 regulatory T cell Absolute Count || id:ebi-a-GCST90001483	MR Egger	10	-0.00803526	0.020144448693489	0.700416	-0.0475184	0.0314478581824253	0.991996935161662	0.953592945269456	1.03194756657105	0.998524067790455
ebi-a-GCST90001483	ukb-saige-740.1	Osteoarthritis; localized || id:ukb-saige-740.1	CD39+ resting CD4 regulatory T cell Absolute Count || id:ebi-a-GCST90001483	Weighted median	10	-0.00245908	0.0171672631291448	0.886099	-0.0361069	0.0311887513913065	0.997543936729219	0.964537159584293	1.03168021658606	0.974299104969666
ebi-a-GCST90001483	ukb-saige-740.1	Osteoarthritis; localized || id:ukb-saige-740.1	CD39+ resting CD4 regulatory T cell Absolute Count || id:ebi-a-GCST90001483	Weighted mode	10	-0.00456517	0.0173938452422726	0.798876	-0.0386571	0.0295267637377708	0.995445231625991	0.962080540765059	1.02996700086974	0.97480223228745
ebi-a-GCST90001484	ukb-saige-740.1	Osteoarthritis; localized || id:ukb-saige-740.1	CD39+ resting CD4 regulatory T cell %resting CD4 regulatory T cell || id:ebi-a-GCST90001484	Inverse variance weighted	6	-0.0193531	0.0185787620746763	0.297562	-0.0557674	0.0170613226657203	0.980833017029513	0.945759070544477	1.01720769830034	1
ebi-a-GCST90001484	ukb-saige-740.1	Osteoarthritis; localized || id:ukb-saige-740.1	CD39+ resting CD4 regulatory T cell %resting CD4 regulatory T cell || id:ebi-a-GCST90001484	Bayesian Weighted Mendelian Randomization	6	-0.0205194	0.0197335842675135	0.298422	-0.0591972	0.0181584024204755	0.979689668028251	0.942520840556476	1.0183242686439	1
ebi-a-GCST90001484	ukb-saige-740.1	Osteoarthritis; localized || id:ukb-saige-740.1	CD39+ resting CD4 regulatory T cell %resting CD4 regulatory T cell || id:ebi-a-GCST90001484	MR Egger	6	-0.0433386	0.035298971237042	0.286847	-0.112525	0.0258474297668486	0.957587140361629	0.893575420748387	1.02618437134045	0.998524067790455
ebi-a-GCST90001484	ukb-saige-740.1	Osteoarthritis; localized || id:ukb-saige-740.1	CD39+ resting CD4 regulatory T cell %resting CD4 regulatory T cell || id:ebi-a-GCST90001484	Weighted median	6	-0.0200135	0.022814318853102	0.38036	-0.0647295	0.0247026019397411	0.980185476968754	0.937320948200433	1.02501023913424	0.974299104969666
ebi-a-GCST90001484	ukb-saige-740.1	Osteoarthritis; localized || id:ukb-saige-740.1	CD39+ resting CD4 regulatory T cell %resting CD4 regulatory T cell || id:ebi-a-GCST90001484	Weighted mode	6	-0.0212929	0.0251232373468924	0.435377	-0.0705344	0.0279486411875631	0.97893218940662	0.93189563590227	1.02834286859665	0.974498079964075
ebi-a-GCST90001485	ukb-saige-740.1	Osteoarthritis; localized || id:ukb-saige-740.1	CD39+ resting CD4 regulatory T cell %CD4 regulatory T cell || id:ebi-a-GCST90001485	Inverse variance weighted	12	-0.00257984	0.00814392333732	0.75141	-0.0185419	0.0133822530050547	0.997423488182836	0.981628917486544	1.01347219611881	1
ebi-a-GCST90001485	ukb-saige-740.1	Osteoarthritis; localized || id:ukb-saige-740.1	CD39+ resting CD4 regulatory T cell %CD4 regulatory T cell || id:ebi-a-GCST90001485	Bayesian Weighted Mendelian Randomization	12	-0.00260589	0.00840197387401639	0.756445	-0.0190738	0.0138619774965523	0.997397501090834	0.981106993034154	1.0139585001894	1
ebi-a-GCST90001485	ukb-saige-740.1	Osteoarthritis; localized || id:ukb-saige-740.1	CD39+ resting CD4 regulatory T cell %CD4 regulatory T cell || id:ebi-a-GCST90001485	MR Egger	12	-0.0134042	0.012309614308509	0.301735	-0.037531	0.01072267574984	0.986685267518804	0.963164547271699	1.01078036966411	0.998524067790455
ebi-a-GCST90001485	ukb-saige-740.1	Osteoarthritis; localized || id:ukb-saige-740.1	CD39+ resting CD4 regulatory T cell %CD4 regulatory T cell || id:ebi-a-GCST90001485	Weighted median	12	-0.00353789	0.0100465590229443	0.724726	-0.0232291	0.0161533668479689	0.996468362117809	0.977038575083296	1.0162845378107	0.974299104969666
ebi-a-GCST90001485	ukb-saige-740.1	Osteoarthritis; localized || id:ukb-saige-740.1	CD39+ resting CD4 regulatory T cell %CD4 regulatory T cell || id:ebi-a-GCST90001485	Weighted mode	12	-0.00555017	0.00918124804266375	0.557767	-0.0235454	0.0124450787440973	0.994465206304272	0.976729616869963	1.01252284098749	0.974498079964075
ebi-a-GCST90001486	ukb-saige-740.1	Osteoarthritis; localized || id:ukb-saige-740.1	Activated CD4 regulatory T cell Absolute Count || id:ebi-a-GCST90001486	Inverse variance weighted	2	0.0228872303711926	0.0214568953771049	0.286125	-0.0191683	0.0649427453103182	1.02315115266557	0.981014258790337	1.0670979262745	1
ebi-a-GCST90001486	ukb-saige-740.1	Osteoarthritis; localized || id:ukb-saige-740.1	Activated CD4 regulatory T cell Absolute Count || id:ebi-a-GCST90001486	Bayesian Weighted Mendelian Randomization	2	0.0232444608627138	0.0223103023362803	0.297471	-0.0204837	0.0669726534418232	1.02351671874653	0.979724634783086	1.06926623702342	1
ebi-a-GCST90001487	ukb-saige-740.1	Osteoarthritis; localized || id:ukb-saige-740.1	Activated CD4 regulatory T cell %CD4 regulatory T cell || id:ebi-a-GCST90001487	Inverse variance weighted	4	0.00297471164816161	0.0181301533818071	0.869672	-0.0325604	0.0385098122765034	1.00297914049328	0.96796399370784	1.03926092582352	1
ebi-a-GCST90001487	ukb-saige-740.1	Osteoarthritis; localized || id:ukb-saige-740.1	Activated CD4 regulatory T cell %CD4 regulatory T cell || id:ebi-a-GCST90001487	Bayesian Weighted Mendelian Randomization	4	0.00287393746604012	0.0188876867465136	0.879061	-0.0341459	0.0398938034892068	1.00287807118339	0.966430464543614	1.04070024958854	1
ebi-a-GCST90001487	ukb-saige-740.1	Osteoarthritis; localized || id:ukb-saige-740.1	Activated CD4 regulatory T cell %CD4 regulatory T cell || id:ebi-a-GCST90001487	MR Egger	4	0.0211051326579431	0.0484981900293312	0.705895	-0.0739513	0.116161585115432	1.02132942107009	0.928716902865883	1.12317734621224	0.998524067790455
ebi-a-GCST90001487	ukb-saige-740.1	Osteoarthritis; localized || id:ukb-saige-740.1	Activated CD4 regulatory T cell %CD4 regulatory T cell || id:ebi-a-GCST90001487	Weighted median	4	0.0074325694801138	0.021271749283159	0.726781	-0.0342601	0.0491251980751054	1.00746025958502	0.966320171589686	1.05035184453759	0.974299104969666
ebi-a-GCST90001487	ukb-saige-740.1	Osteoarthritis; localized || id:ukb-saige-740.1	Activated CD4 regulatory T cell %CD4 regulatory T cell || id:ebi-a-GCST90001487	Weighted mode	4	0.00428382046868847	0.0218638908970309	0.857185	-0.0385694	0.0471370466268689	1.00429300914379	0.962164922702453	1.04826566050879	0.978812160446256
ebi-a-GCST90001489	ukb-saige-740.1	Osteoarthritis; localized || id:ukb-saige-740.1	CD39+ activated CD4 regulatory T cell Absolute Count || id:ebi-a-GCST90001489	Inverse variance weighted	4	-0.0175266	0.023774903556442	0.461007	-0.0641254	0.0290722071820076	0.982626093740448	0.93788736723611	1.0294989290079	1
ebi-a-GCST90001489	ukb-saige-740.1	Osteoarthritis; localized || id:ukb-saige-740.1	CD39+ activated CD4 regulatory T cell Absolute Count || id:ebi-a-GCST90001489	Bayesian Weighted Mendelian Randomization	4	-0.0176257	0.0264694399453744	0.505482	-0.0695058	0.0342543826488542	0.982528704741046	0.932854702347427	1.03484782057794	1
ebi-a-GCST90001489	ukb-saige-740.1	Osteoarthritis; localized || id:ukb-saige-740.1	CD39+ activated CD4 regulatory T cell Absolute Count || id:ebi-a-GCST90001489	MR Egger	4	-0.0107438	0.107080374839689	0.929231	-0.220621	0.199133749410565	0.989313723049171	0.802020331883712	1.22034517543294	0.998524067790455
ebi-a-GCST90001489	ukb-saige-740.1	Osteoarthritis; localized || id:ukb-saige-740.1	CD39+ activated CD4 regulatory T cell Absolute Count || id:ebi-a-GCST90001489	Weighted median	4	-0.0301292	0.0284981725002745	0.290406	-0.0859856	0.0257272318360896	0.970320173412757	0.917607440666873	1.02606103351506	0.974299104969666
ebi-a-GCST90001489	ukb-saige-740.1	Osteoarthritis; localized || id:ukb-saige-740.1	CD39+ activated CD4 regulatory T cell Absolute Count || id:ebi-a-GCST90001489	Weighted mode	4	-0.0322364	0.0356774355670185	0.432835	-0.102164	0.0376913754257276	0.968277655843525	0.902881311672804	1.03841	0.974498079964075
ebi-a-GCST90001491	ieu-a-1170	Knee and hip osteoarthritis || id:ieu-a-1170	CD39+ activated CD4 regulatory T cell %CD4 regulatory T cell || id:ebi-a-GCST90001491	Wald ratio	1	0.104997879109226	0.106141569459173	0.322553	-0.10304	0.313035355249205	1.11070825466232	0.902091252639229	1.36756988094683	1
ebi-a-GCST90001491	ieu-a-1171	Knee osteoarthritis || id:ieu-a-1171	CD39+ activated CD4 regulatory T cell %CD4 regulatory T cell || id:ebi-a-GCST90001491	Wald ratio	1	0.30895493107105	0.153289501590668	0.0438523	0.00850750795334043	0.609402354188759	1.36200098519452	1.0085437996434	1.83933180128293	0.900659323502345
ebi-a-GCST90001491	ukb-saige-740.1	Osteoarthritis; localized || id:ukb-saige-740.1	CD39+ activated CD4 regulatory T cell %CD4 regulatory T cell || id:ebi-a-GCST90001491	Inverse variance weighted	6	-0.00616228	0.0147610052676928	0.676335	-0.0350938	0.022769293621268	0.99385667118299	0.965514801310984	1.02303049265921	1
ebi-a-GCST90001491	ukb-saige-740.1	Osteoarthritis; localized || id:ukb-saige-740.1	CD39+ activated CD4 regulatory T cell %CD4 regulatory T cell || id:ebi-a-GCST90001491	Bayesian Weighted Mendelian Randomization	6	-0.00732107	0.0174767505874586	0.675287	-0.0415755	0.0269333639124002	0.992705666494139	0.959276908744867	1.02729934527348	1
ebi-a-GCST90001491	ukb-saige-740.1	Osteoarthritis; localized || id:ukb-saige-740.1	CD39+ activated CD4 regulatory T cell %CD4 regulatory T cell || id:ebi-a-GCST90001491	MR Egger	6	-0.016479	0.0274422361609235	0.58054	-0.0702658	0.0373077583993852	0.983656011874544	0.932146015709732	1.03801242872901	0.998524067790455
ebi-a-GCST90001491	ukb-saige-740.1	Osteoarthritis; localized || id:ukb-saige-740.1	CD39+ activated CD4 regulatory T cell %CD4 regulatory T cell || id:ebi-a-GCST90001491	Weighted median	6	-0.00970636	0.0111017364529263	0.381949	-0.0314658	0.0120530387058593	0.990340589973707	0.969024127336175	1.01212596929407	0.974299104969666
ebi-a-GCST90001491	ukb-saige-740.1	Osteoarthritis; localized || id:ukb-saige-740.1	CD39+ activated CD4 regulatory T cell %CD4 regulatory T cell || id:ebi-a-GCST90001491	Weighted mode	6	-0.0072191	0.011897908963737	0.570508	-0.030539	0.0161008020291429	0.992806895567931	0.969922603272646	1.01623111840209	0.974498079964075
ebi-a-GCST90001492	ukb-saige-740.1	Osteoarthritis; localized || id:ukb-saige-740.1	Secreting CD4 regulatory T cell Absolute Count || id:ebi-a-GCST90001492	Inverse variance weighted	4	0.000600903812851758	0.0231709356812129	0.97931	-0.0448141	0.0460159377480291	1.00060108439172	0.956175189482843	1.04709109909805	1
ebi-a-GCST90001492	ukb-saige-740.1	Osteoarthritis; localized || id:ukb-saige-740.1	Secreting CD4 regulatory T cell Absolute Count || id:ebi-a-GCST90001492	Bayesian Weighted Mendelian Randomization	4	0.00759668526295338	0.0189701894674461	0.688822	-0.0295849	0.0447782566191478	1.0076256132824	0.970848462610179	1.04579593586936	1
ebi-a-GCST90001492	ukb-saige-740.1	Osteoarthritis; localized || id:ukb-saige-740.1	Secreting CD4 regulatory T cell Absolute Count || id:ebi-a-GCST90001492	MR Egger	4	0.0588702322600975	0.0231056439140005	0.125658	0.0135831701886565	0.104157294331539	1.06063759526579	1.01367584055526	1.10977500250473	0.998524067790455
ebi-a-GCST90001492	ukb-saige-740.1	Osteoarthritis; localized || id:ukb-saige-740.1	Secreting CD4 regulatory T cell Absolute Count || id:ebi-a-GCST90001492	Weighted median	4	0.0124014847310152	0.0152109777859047	0.414902	-0.017412	0.0422150011913883	1.01247870201562	0.982738681685085	1.04311872641208	0.974299104969666
ebi-a-GCST90001492	ukb-saige-740.1	Osteoarthritis; localized || id:ukb-saige-740.1	Secreting CD4 regulatory T cell Absolute Count || id:ebi-a-GCST90001492	Weighted mode	4	0.0145799041107454	0.0148256057352022	0.397912	-0.0144783	0.0436380913517418	1.01468670935146	0.98562602321193	1.04460423516346	0.974498079964075
ebi-a-GCST90001493	ieu-a-1169	Hip osteoarthritis || id:ieu-a-1169	Secreting CD4 regulatory T cell %CD4 regulatory T cell || id:ebi-a-GCST90001493	Inverse variance weighted	2	0.06633626646731	0.0910584365714413	0.466306	-0.112138	0.244810802147335	1.06858598639217	0.893920647250683	1.27737961286122	1
ebi-a-GCST90001493	ieu-a-1169	Hip osteoarthritis || id:ieu-a-1169	Secreting CD4 regulatory T cell %CD4 regulatory T cell || id:ebi-a-GCST90001493	Bayesian Weighted Mendelian Randomization	2	0.0667785939076769	0.0922555151099369	0.469162	-0.114042	0.247599403523153	1.06905875584809	0.892220289376326	1.28095	1
ebi-a-GCST90001493	ieu-a-1170	Knee and hip osteoarthritis || id:ieu-a-1170	Secreting CD4 regulatory T cell %CD4 regulatory T cell || id:ebi-a-GCST90001493	Inverse variance weighted	2	0.0229433160499315	0.0660572782715235	0.728347	-0.106529	0.152415581462117	1.02320853840167	0.898949023783601	1.1646441403891	1
ebi-a-GCST90001493	ieu-a-1170	Knee and hip osteoarthritis || id:ieu-a-1170	Secreting CD4 regulatory T cell %CD4 regulatory T cell || id:ebi-a-GCST90001493	Bayesian Weighted Mendelian Randomization	2	0.0232381644187681	0.0668698451944306	0.728206	-0.107827	0.154303060999852	1.02351027425117	0.897783139898065	1.16684445824706	1
ebi-a-GCST90001493	ieu-a-1171	Knee osteoarthritis || id:ieu-a-1171	Secreting CD4 regulatory T cell %CD4 regulatory T cell || id:ebi-a-GCST90001493	Inverse variance weighted	2	-0.0301326	0.0819835838603752	0.713213	-0.19082	0.130555181777917	0.970316819677678	0.826280919565318	1.13946081563242	1
ebi-a-GCST90001493	ieu-a-1171	Knee osteoarthritis || id:ieu-a-1171	Secreting CD4 regulatory T cell %CD4 regulatory T cell || id:ebi-a-GCST90001493	Bayesian Weighted Mendelian Randomization	2	-0.0303737	0.0829713638420026	0.71431	-0.192998	0.132250190022342	0.970082962193018	0.824483988979034	1.14139384889997	1
ebi-a-GCST90001494	ukb-saige-740.1	Osteoarthritis; localized || id:ukb-saige-740.1	Secreting CD4 regulatory T cell %CD4+ T cell || id:ebi-a-GCST90001494	Inverse variance weighted	7	0.00630571445304195	0.012376906936802	0.61042	-0.017953	0.030564452049174	1.00632563732439	0.982207172280326	1.03103634031224	1
ebi-a-GCST90001494	ukb-saige-740.1	Osteoarthritis; localized || id:ukb-saige-740.1	Secreting CD4 regulatory T cell %CD4+ T cell || id:ebi-a-GCST90001494	Bayesian Weighted Mendelian Randomization	7	0.00970398746950232	0.011346168207699	0.392404	-0.0125345	0.0319424771565924	1.00975122382594	0.987543727457525	1.03245811367055	1
ebi-a-GCST90001494	ukb-saige-740.1	Osteoarthritis; localized || id:ukb-saige-740.1	Secreting CD4 regulatory T cell %CD4+ T cell || id:ebi-a-GCST90001494	MR Egger	7	0.0187633502264651	0.014922062415814	0.264134	-0.0104839	0.0480105925614607	1.01894048804749	0.989570872339734	1.04918176878798	0.998524067790455
ebi-a-GCST90001494	ukb-saige-740.1	Osteoarthritis; localized || id:ukb-saige-740.1	Secreting CD4 regulatory T cell %CD4+ T cell || id:ebi-a-GCST90001494	Weighted median	7	0.0157649778920234	0.0117752282584727	0.180627	-0.00731447	0.0388444252786299	1.01588990076141	0.992712216134032	1.03960873422926	0.974299104969666
ebi-a-GCST90001494	ukb-saige-740.1	Osteoarthritis; localized || id:ukb-saige-740.1	Secreting CD4 regulatory T cell %CD4+ T cell || id:ebi-a-GCST90001494	Weighted mode	7	0.0123712589573362	0.0116754312044588	0.330108	-0.0105126	0.0352551041180754	1.01244809952601	0.989542477906618	1.03588393335305	0.974498079964075
ebi-a-GCST90001497	ieu-a-1169	Hip osteoarthritis || id:ieu-a-1169	CD39+ secreting CD4 regulatory T cell %CD4 regulatory T cell || id:ebi-a-GCST90001497	Inverse variance weighted	3	-0.0252266	0.028606576715734	0.377861	-0.0812955	0.0308423187292524	0.975088959500044	0.921921258504215	1.03132287076395	1
ebi-a-GCST90001497	ieu-a-1169	Hip osteoarthritis || id:ieu-a-1169	CD39+ secreting CD4 regulatory T cell %CD4 regulatory T cell || id:ebi-a-GCST90001497	Bayesian Weighted Mendelian Randomization	3	-0.0252557	0.0286424943652525	0.377909	-0.0813949	0.0308836353087892	0.975060602362085	0.9218295497799	1.03136548237764	1
ebi-a-GCST90001497	ieu-a-1169	Hip osteoarthritis || id:ieu-a-1169	CD39+ secreting CD4 regulatory T cell %CD4 regulatory T cell || id:ebi-a-GCST90001497	MR Egger	3	-0.0377397	0.0519643829183397	0.600117	-0.13959	0.0641104664183028	0.962963544478372	0.869714819609733	1.06621017267529	0.998524067790455
ebi-a-GCST90001497	ieu-a-1169	Hip osteoarthritis || id:ieu-a-1169	CD39+ secreting CD4 regulatory T cell %CD4 regulatory T cell || id:ebi-a-GCST90001497	Weighted median	3	-0.0277132	0.0282913589660723	0.327302	-0.0831642	0.0277379106872806	0.972667333606235	0.920200022821923	1.02812618822087	0.974299104969666
ebi-a-GCST90001497	ieu-a-1169	Hip osteoarthritis || id:ieu-a-1169	CD39+ secreting CD4 regulatory T cell %CD4 regulatory T cell || id:ebi-a-GCST90001497	Weighted mode	3	-0.0282791	0.0296328099183548	0.440639	-0.0863594	0.0298012083486747	0.972117011960887	0.917264501117515	1.03024970855456	0.974498079964075
ebi-a-GCST90001497	ieu-a-1170	Knee and hip osteoarthritis || id:ieu-a-1170	CD39+ secreting CD4 regulatory T cell %CD4 regulatory T cell || id:ebi-a-GCST90001497	Inverse variance weighted	3	-0.0324273	0.0212513949477909	0.127037	-0.0740801	0.00922540706515104	0.968092801451623	0.928597346312117	1.00926809229481	1
ebi-a-GCST90001497	ieu-a-1170	Knee and hip osteoarthritis || id:ieu-a-1170	CD39+ secreting CD4 regulatory T cell %CD4 regulatory T cell || id:ebi-a-GCST90001497	Bayesian Weighted Mendelian Randomization	3	-0.0327979	0.0262901451181219	0.212201	-0.0843266	0.0187307674582906	0.967734102466955	0.919131017587144	1.01890728868666	1
ebi-a-GCST90001497	ieu-a-1170	Knee and hip osteoarthritis || id:ieu-a-1170	CD39+ secreting CD4 regulatory T cell %CD4 regulatory T cell || id:ebi-a-GCST90001497	MR Egger	3	-0.0718231	0.0363886197980047	0.298541	-0.143145	-0.000501418	0.930695509283908	0.866628565318262	0.999498707595831	0.998524067790455
ebi-a-GCST90001497	ieu-a-1170	Knee and hip osteoarthritis || id:ieu-a-1170	CD39+ secreting CD4 regulatory T cell %CD4 regulatory T cell || id:ebi-a-GCST90001497	Weighted median	3	-0.0375392	0.0210781643778604	0.0749203	-0.0788524	0.00377399841294887	0.963156657610835	0.924176317306642	1.0037811289123	0.974299104969666
ebi-a-GCST90001497	ieu-a-1170	Knee and hip osteoarthritis || id:ieu-a-1170	CD39+ secreting CD4 regulatory T cell %CD4 regulatory T cell || id:ebi-a-GCST90001497	Weighted mode	3	-0.0382879	0.0210792199843656	0.210958	-0.0796031	0.00302741212595115	0.962435855147692	0.92348277608225	1.00303199936603	0.974498079964075
ebi-a-GCST90001497	ieu-a-1171	Knee osteoarthritis || id:ieu-a-1171	CD39+ secreting CD4 regulatory T cell %CD4 regulatory T cell || id:ebi-a-GCST90001497	Inverse variance weighted	3	-0.0203441	0.0413355429818736	0.622599	-0.101362	0.0606735366664164	0.979861417944061	0.903606056458718	1.06255197329923	1
ebi-a-GCST90001497	ieu-a-1171	Knee osteoarthritis || id:ieu-a-1171	CD39+ secreting CD4 regulatory T cell %CD4 regulatory T cell || id:ebi-a-GCST90001497	Bayesian Weighted Mendelian Randomization	3	-0.0233208	0.0542050434627882	0.667026	-0.129563	0.0829210976521361	0.976949040427176	0.878479529987574	1.08645608123058	1
ebi-a-GCST90001497	ieu-a-1171	Knee osteoarthritis || id:ieu-a-1171	CD39+ secreting CD4 regulatory T cell %CD4 regulatory T cell || id:ebi-a-GCST90001497	MR Egger	3	-0.105291	0.0482327394266291	0.273466	-0.199828	-0.0107552	0.900062257100162	0.818871985857171	0.989302455875611	0.998524067790455
ebi-a-GCST90001497	ieu-a-1171	Knee osteoarthritis || id:ieu-a-1171	CD39+ secreting CD4 regulatory T cell %CD4 regulatory T cell || id:ebi-a-GCST90001497	Weighted median	3	-0.0236409	0.0260837861908251	0.364754	-0.0747651	0.0274833311183678	0.976636366857619	0.927961428895739	1.02786448161308	0.974299104969666
ebi-a-GCST90001497	ieu-a-1171	Knee osteoarthritis || id:ieu-a-1171	CD39+ secreting CD4 regulatory T cell %CD4 regulatory T cell || id:ebi-a-GCST90001497	Weighted mode	3	-0.0294739	0.0245130257977739	0.35226	-0.0775194	0.0185716758160244	0.970956263205896	0.925409084879612	1.01874520194645	0.974498079964075
ebi-a-GCST90001497	ukb-saige-740.1	Osteoarthritis; localized || id:ukb-saige-740.1	CD39+ secreting CD4 regulatory T cell %CD4 regulatory T cell || id:ebi-a-GCST90001497	Inverse variance weighted	7	-0.00360595	0.0145989369468619	0.804907	-0.0322199	0.0250079647982202	0.996400542018315	0.968293661849619	1.02532	1
ebi-a-GCST90001497	ukb-saige-740.1	Osteoarthritis; localized || id:ukb-saige-740.1	CD39+ secreting CD4 regulatory T cell %CD4 regulatory T cell || id:ebi-a-GCST90001497	Bayesian Weighted Mendelian Randomization	7	-0.00143313	0.0166771097446436	0.931519	-0.0341203	0.0312540069750732	0.998567898313285	0.966455268621799	1.0317475416775	1
ebi-a-GCST90001497	ukb-saige-740.1	Osteoarthritis; localized || id:ukb-saige-740.1	CD39+ secreting CD4 regulatory T cell %CD4 regulatory T cell || id:ebi-a-GCST90001497	MR Egger	7	-0.0148906	0.0261124554255917	0.593177	-0.066071	0.0362898078833547	0.985219712063971	0.93606438508627	1.03695632106541	0.998524067790455
ebi-a-GCST90001497	ukb-saige-740.1	Osteoarthritis; localized || id:ukb-saige-740.1	CD39+ secreting CD4 regulatory T cell %CD4 regulatory T cell || id:ebi-a-GCST90001497	Weighted median	7	-0.00818328	0.0102765362122524	0.425853	-0.0283253	0.0119587309868902	0.991850111899427	0.972072109091597	1.01203052250335	0.974299104969666
ebi-a-GCST90001497	ukb-saige-740.1	Osteoarthritis; localized || id:ukb-saige-740.1	CD39+ secreting CD4 regulatory T cell %CD4 regulatory T cell || id:ebi-a-GCST90001497	Weighted mode	7	-0.00693449	0.0112065693683777	0.558801	-0.0288994	0.015030388875943	0.993089500989136	0.971514229777936	1.01514391322943	0.974498079964075
ebi-a-GCST90001498	ieu-a-1169	Hip osteoarthritis || id:ieu-a-1169	Activated & resting CD4 regulatory T cell Absolute Count || id:ebi-a-GCST90001498	Wald ratio	1	-0.134059	0.189238221632382	0.478688	-0.504966	0.236847856668879	0.874538414824096	0.603526111785672	1.26724829972999	1
ebi-a-GCST90001498	ieu-a-1170	Knee and hip osteoarthritis || id:ieu-a-1170	Activated & resting CD4 regulatory T cell Absolute Count || id:ebi-a-GCST90001498	Wald ratio	1	-0.0666908	0.136864631718646	0.626063	-0.334945	0.201563901791639	0.935484430501173	0.715377105857792	1.22331440654751	1
ebi-a-GCST90001498	ieu-a-1171	Knee osteoarthritis || id:ieu-a-1171	Activated & resting CD4 regulatory T cell Absolute Count || id:ebi-a-GCST90001498	Wald ratio	1	0.0660274054412741	0.167739216987392	0.693853	-0.262741	0.394796270736563	1.06825599279171	0.768940673648241	1.48408180922609	1
ebi-a-GCST90001498	ukb-saige-740.1	Osteoarthritis; localized || id:ukb-saige-740.1	Activated & resting CD4 regulatory T cell Absolute Count || id:ebi-a-GCST90001498	Wald ratio	1	0.212342402123424	0.072992700729927	0.00362481	0.0692767086927671	0.355408095554081	1.23657	1.07173272588365	1.42676279104144	0.337734099915754
ebi-a-GCST90001499	ieu-a-1169	Hip osteoarthritis || id:ieu-a-1169	Activated & resting CD4 regulatory T cell %CD4 regulatory T cell || id:ebi-a-GCST90001499	Inverse variance weighted	2	-0.0664069	0.0910799626250321	0.465937	-0.244924	0.112109834102906	0.935750037014006	0.782764323977332	1.11863571824854	1
ebi-a-GCST90001499	ieu-a-1169	Hip osteoarthritis || id:ieu-a-1169	Activated & resting CD4 regulatory T cell %CD4 regulatory T cell || id:ebi-a-GCST90001499	Bayesian Weighted Mendelian Randomization	2	-0.0668537	0.0922932645845312	0.468844	-0.247748	0.114041140242498	0.93533206936649	0.780556262105043	1.12079823384681	1
ebi-a-GCST90001499	ieu-a-1170	Knee and hip osteoarthritis || id:ieu-a-1170	Activated & resting CD4 regulatory T cell %CD4 regulatory T cell || id:ebi-a-GCST90001499	Inverse variance weighted	2	-0.0231228	0.0660670329889926	0.726347	-0.152614	0.106368633253472	0.977142530792735	0.858460907016088	1.11223180657443	1
ebi-a-GCST90001499	ieu-a-1170	Knee and hip osteoarthritis || id:ieu-a-1170	Activated & resting CD4 regulatory T cell %CD4 regulatory T cell || id:ebi-a-GCST90001499	Bayesian Weighted Mendelian Randomization	2	-0.0234212	0.0668902712874529	0.72623	-0.154526	0.107683687075178	0.976850903876073	0.856821063381965	1.11369541341225	1
ebi-a-GCST90001499	ieu-a-1171	Knee osteoarthritis || id:ieu-a-1171	Activated & resting CD4 regulatory T cell %CD4 regulatory T cell || id:ebi-a-GCST90001499	Inverse variance weighted	2	0.0301922800965048	0.0819650888730312	0.712608	-0.130459	0.190843854287646	1.03065268890077	0.877692219478018	1.21027045878351	1
ebi-a-GCST90001499	ieu-a-1171	Knee osteoarthritis || id:ieu-a-1171	Activated & resting CD4 regulatory T cell %CD4 regulatory T cell || id:ebi-a-GCST90001499	Bayesian Weighted Mendelian Randomization	2	0.0304364941719077	0.0829662568402569	0.713728	-0.132177	0.193050357578811	1.03090441953108	0.876185572931442	1.21294387289787	1
ebi-a-GCST90001500	ieu-a-1169	Hip osteoarthritis || id:ieu-a-1169	Activated & resting CD4 regulatory T cell %CD4+ T cell || id:ebi-a-GCST90001500	Inverse variance weighted	2	-0.129646	0.118719046657058	0.274815	-0.362335	0.103043225135843	0.878406238344184	0.696048847612039	1.10853932480332	1
ebi-a-GCST90001500	ieu-a-1169	Hip osteoarthritis || id:ieu-a-1169	Activated & resting CD4 regulatory T cell %CD4+ T cell || id:ebi-a-GCST90001500	Bayesian Weighted Mendelian Randomization	2	-0.131103	0.121873234471559	0.282048	-0.369974	0.107768889793188	0.87712773280878	0.690752159179627	1.11379030733106	1
ebi-a-GCST90001500	ieu-a-1170	Knee and hip osteoarthritis || id:ieu-a-1170	Activated & resting CD4 regulatory T cell %CD4+ T cell || id:ebi-a-GCST90001500	Inverse variance weighted	2	-0.037347	0.08705334926128	0.667914	-0.207972	0.133277598393842	0.963341830342174	0.812230159998453	1.14256712911126	1
ebi-a-GCST90001500	ieu-a-1170	Knee and hip osteoarthritis || id:ieu-a-1170	Activated & resting CD4 regulatory T cell %CD4+ T cell || id:ebi-a-GCST90001500	Bayesian Weighted Mendelian Randomization	2	-0.0377275	0.0886420336303106	0.670387	-0.211466	0.136010852134883	0.962975283384754	0.809396865073959	1.14569432675677	1
ebi-a-GCST90001500	ieu-a-1171	Knee osteoarthritis || id:ieu-a-1171	Activated & resting CD4 regulatory T cell %CD4+ T cell || id:ebi-a-GCST90001500	Inverse variance weighted	2	0.0657764579045307	0.107521164427315	0.540701	-0.144965	0.276517940182069	1.06798795021543	0.8650525483369	1.31853060718473	1
ebi-a-GCST90001500	ieu-a-1171	Knee osteoarthritis || id:ieu-a-1171	Activated & resting CD4 regulatory T cell %CD4+ T cell || id:ebi-a-GCST90001500	Bayesian Weighted Mendelian Randomization	2	0.0664421240937605	0.109790976774986	0.545067	-0.148748	0.281632438572734	1.06869911035576	0.861786093603409	1.32529150441455	1
ebi-a-GCST90001501	ukb-saige-740.1	Osteoarthritis; localized || id:ukb-saige-740.1	Activated & secreting CD4 regulatory T cell Absolute Count || id:ebi-a-GCST90001501	Inverse variance weighted	4	0.00108709631179324	0.0231685348001066	0.962576	-0.0443232	0.0464974245200022	1.00108768741516	0.956644689415933	1.04759538100411	1
ebi-a-GCST90001501	ukb-saige-740.1	Osteoarthritis; localized || id:ukb-saige-740.1	Activated & secreting CD4 regulatory T cell Absolute Count || id:ebi-a-GCST90001501	Bayesian Weighted Mendelian Randomization	4	0.00787621670160412	0.0188894658838599	0.676705	-0.0291471	0.0448995698339695	1.00790731569021	0.971273544229885	1.04592281243213	1
ebi-a-GCST90001501	ukb-saige-740.1	Osteoarthritis; localized || id:ukb-saige-740.1	Activated & secreting CD4 regulatory T cell Absolute Count || id:ebi-a-GCST90001501	MR Egger	4	0.0584977539776743	0.0228056899913276	0.12428	0.0137986015946721	0.103196906360676	1.06024260436336	1.01389424169122	1.1087096995759	0.998524067790455
ebi-a-GCST90001501	ukb-saige-740.1	Osteoarthritis; localized || id:ukb-saige-740.1	Activated & secreting CD4 regulatory T cell Absolute Count || id:ebi-a-GCST90001501	Weighted median	4	0.0134844845162422	0.015310456841498	0.37846	-0.016524	0.0434929799255782	1.01357581020919	0.983611761710277	1.04445266215087	0.974299104969666
ebi-a-GCST90001501	ukb-saige-740.1	Osteoarthritis; localized || id:ukb-saige-740.1	Activated & secreting CD4 regulatory T cell Absolute Count || id:ebi-a-GCST90001501	Weighted mode	4	0.0152094113354006	0.0151619963747979	0.389711	-0.0145081	0.0449269242300044	1.01532566305765	0.985596633830558	1.04595142341028	0.974498079964075
ebi-a-GCST90001502	ieu-a-1169	Hip osteoarthritis || id:ieu-a-1169	Activated & secreting CD4 regulatory T cell %CD4 regulatory T cell || id:ebi-a-GCST90001502	Inverse variance weighted	2	0.0666857152847461	0.0912554278995716	0.464926	-0.112175	0.245546353967906	1.06895946775396	0.893887881917776	1.27831953740025	1
ebi-a-GCST90001502	ieu-a-1169	Hip osteoarthritis || id:ieu-a-1169	Activated & secreting CD4 regulatory T cell %CD4 regulatory T cell || id:ebi-a-GCST90001502	Bayesian Weighted Mendelian Randomization	2	0.0670738873374473	0.0923267942302621	0.467542	-0.113887	0.248034404028761	1.06937448848932	0.892359117477654	1.28150402033679	1
ebi-a-GCST90001502	ieu-a-1170	Knee and hip osteoarthritis || id:ieu-a-1170	Activated & secreting CD4 regulatory T cell %CD4 regulatory T cell || id:ebi-a-GCST90001502	Inverse variance weighted	2	0.0236902942166664	0.0661769552027812	0.720355	-0.106017	0.153397126414118	1.02397313837406	0.899409773531375	1.16578785217642	1
ebi-a-GCST90001502	ieu-a-1170	Knee and hip osteoarthritis || id:ieu-a-1170	Activated & secreting CD4 regulatory T cell %CD4 regulatory T cell || id:ebi-a-GCST90001502	Bayesian Weighted Mendelian Randomization	2	0.0239541539656631	0.0669036689159863	0.720314	-0.107177	0.155085345040996	1.02424335931798	0.898366614682222	1.16775761917429	1
ebi-a-GCST90001502	ieu-a-1171	Knee osteoarthritis || id:ieu-a-1171	Activated & secreting CD4 regulatory T cell %CD4 regulatory T cell || id:ebi-a-GCST90001502	Inverse variance weighted	2	-0.0304042	0.0820110856777903	0.710836	-0.191146	0.130337504516962	0.970053336017308	0.826012021791581	1.13921280791691	1
ebi-a-GCST90001502	ieu-a-1171	Knee osteoarthritis || id:ieu-a-1171	Activated & secreting CD4 regulatory T cell %CD4 regulatory T cell || id:ebi-a-GCST90001502	Bayesian Weighted Mendelian Randomization	2	-0.030619	0.0828957927150319	0.711854	-0.193095	0.131856709779168	0.969844971026113	0.824403818878677	1.14094482131828	1
ebi-a-GCST90001503	ukb-saige-740.1	Osteoarthritis; localized || id:ukb-saige-740.1	Activated & secreting CD4 regulatory T cell %CD4+ T cell || id:ebi-a-GCST90001503	Inverse variance weighted	9	0.000745307456926131	0.0116466476402907	0.948976	-0.0220821	0.0235727368318958	1.00074558526754	0.978159903385341	1.02385276984508	1
ebi-a-GCST90001503	ukb-saige-740.1	Osteoarthritis; localized || id:ukb-saige-740.1	Activated & secreting CD4 regulatory T cell %CD4+ T cell || id:ebi-a-GCST90001503	Bayesian Weighted Mendelian Randomization	9	0.00300442160479697	0.0105636749274267	0.776096	-0.0177004	0.0237092244625533	1.00300893940271	0.982455350305594	1.02399252262082	1
ebi-a-GCST90001503	ukb-saige-740.1	Osteoarthritis; localized || id:ukb-saige-740.1	Activated & secreting CD4 regulatory T cell %CD4+ T cell || id:ebi-a-GCST90001503	MR Egger	9	0.00953105408845036	0.0145047940187689	0.532121	-0.0188983	0.0379604503652375	1.0095766192307	0.981279111859699	1.03869015224999	0.998524067790455
ebi-a-GCST90001503	ukb-saige-740.1	Osteoarthritis; localized || id:ukb-saige-740.1	Activated & secreting CD4 regulatory T cell %CD4+ T cell || id:ebi-a-GCST90001503	Weighted median	9	0.0131462197157055	0.0121381043573165	0.278785	-0.0106445	0.0369369042560458	1.01323301117161	0.98941198701365	1.03762754889053	0.974299104969666
ebi-a-GCST90001503	ukb-saige-740.1	Osteoarthritis; localized || id:ukb-saige-740.1	Activated & secreting CD4 regulatory T cell %CD4+ T cell || id:ebi-a-GCST90001503	Weighted mode	9	0.009807741780613	0.011029308122927	0.399821	-0.0118097	0.0314251857015499	1.00985599530371	0.988259758685886	1.03192417002481	0.974498079964075
ebi-a-GCST90001504	ukb-saige-740.1	Osteoarthritis; localized || id:ukb-saige-740.1	CD25++ CD4+ T cell Absolute Count || id:ebi-a-GCST90001504	Wald ratio	1	-0.118919	0.0410810810810811	0.00379476	-0.199438	-0.0384	0.887879788096594	0.819191141922831	0.962327932721611	0.337734099915754
ebi-a-GCST90001505	ukb-saige-740.1	Osteoarthritis; localized || id:ukb-saige-740.1	CD25++ CD4+ T cell %CD4+ T cell || id:ebi-a-GCST90001505	Inverse variance weighted	2	-0.0878016	0.03089720770406	0.00448691	-0.14836	-0.0272431	0.915942576928042	0.862120581546984	0.973124667461452	0.35235436342728
ebi-a-GCST90001505	ukb-saige-740.1	Osteoarthritis; localized || id:ukb-saige-740.1	CD25++ CD4+ T cell %CD4+ T cell || id:ebi-a-GCST90001505	Bayesian Weighted Mendelian Randomization	2	-0.0886408	0.032231482898732	0.00595712	-0.151815	-0.0254671	0.915174212775907	0.859147601904814	0.974854423003782	0.999307653531375
ebi-a-GCST90001506	ukb-saige-740.1	Osteoarthritis; localized || id:ukb-saige-740.1	CD25++ CD4+ T cell %T cell || id:ebi-a-GCST90001506	Wald ratio	1	-0.106672	0.0368502715283165	0.00379476	-0.178898	-0.0344453	0.898820582788355	0.83619087646354	0.966141179942931	0.337734099915754
ebi-a-GCST90001507	ukb-saige-740.1	Osteoarthritis; localized || id:ukb-saige-740.1	CD25++ CD45RA+ CD4 not regulatory T cell Absolute Count || id:ebi-a-GCST90001507	Inverse variance weighted	3	0.0283934761040585	0.0237956102647132	0.232782	-0.0182459	0.0750328722228963	1.02880041316909	0.981919528999179	1.07791958391507	1
ebi-a-GCST90001507	ukb-saige-740.1	Osteoarthritis; localized || id:ukb-saige-740.1	CD25++ CD45RA+ CD4 not regulatory T cell Absolute Count || id:ebi-a-GCST90001507	Bayesian Weighted Mendelian Randomization	3	0.0289731033848716	0.0245600430878097	0.238126	-0.0191646	0.0771107878369786	1.02939690681036	0.981017891984057	1.08016173854652	1
ebi-a-GCST90001507	ukb-saige-740.1	Osteoarthritis; localized || id:ukb-saige-740.1	CD25++ CD45RA+ CD4 not regulatory T cell Absolute Count || id:ebi-a-GCST90001507	MR Egger	3	0.026908453457619	0.0326648352994114	0.561324	-0.0371146	0.0909315306444652	1.02727375509833	0.963565681527088	1.09519401546282	0.998524067790455
ebi-a-GCST90001507	ukb-saige-740.1	Osteoarthritis; localized || id:ukb-saige-740.1	CD25++ CD45RA+ CD4 not regulatory T cell Absolute Count || id:ebi-a-GCST90001507	Weighted median	3	0.0282759026192895	0.0261687390653869	0.27991	-0.0230148	0.0795666311874478	1.02867946062992	0.977247995037066	1.08281770655537	0.974299104969666
ebi-a-GCST90001507	ukb-saige-740.1	Osteoarthritis; localized || id:ukb-saige-740.1	CD25++ CD45RA+ CD4 not regulatory T cell Absolute Count || id:ebi-a-GCST90001507	Weighted mode	3	0.0275202535337743	0.0293846472414566	0.447856	-0.0300737	0.0851141621270292	1.02790243355308	0.970374057957314	1.08884136404936	0.974498079964075
ebi-a-GCST90001508	ukb-saige-740.1	Osteoarthritis; localized || id:ukb-saige-740.1	CD25++ CD45RA+ CD4 not regulatory T cell %CD4+ T cell || id:ebi-a-GCST90001508	Inverse variance weighted	4	0.0281797545376798	0.0186492057647424	0.130777	-0.00837269	0.0647321978365748	1.02858055982783	0.991662264578161	1.06687327515258	1
ebi-a-GCST90001508	ukb-saige-740.1	Osteoarthritis; localized || id:ukb-saige-740.1	CD25++ CD45RA+ CD4 not regulatory T cell %CD4+ T cell || id:ebi-a-GCST90001508	Bayesian Weighted Mendelian Randomization	4	0.0285515996668356	0.0194928075353821	0.142996	-0.0096543	0.0667575024361844	1.02896310361806	0.990392150070488	1.0690362080636	1
ebi-a-GCST90001508	ukb-saige-740.1	Osteoarthritis; localized || id:ukb-saige-740.1	CD25++ CD45RA+ CD4 not regulatory T cell %CD4+ T cell || id:ebi-a-GCST90001508	MR Egger	4	0.0102604265541474	0.0261393250909793	0.732551	-0.0409727	0.0614935037324669	1.01031324522348	0.959855381034378	1.06342358822223	0.998524067790455
ebi-a-GCST90001508	ukb-saige-740.1	Osteoarthritis; localized || id:ukb-saige-740.1	CD25++ CD45RA+ CD4 not regulatory T cell %CD4+ T cell || id:ebi-a-GCST90001508	Weighted median	4	0.0233423753829899	0.0207988894080326	0.261739	-0.0174234	0.0641081986227338	1.02361694080155	0.982727462679137	1.06620775473132	0.974299104969666
ebi-a-GCST90001508	ukb-saige-740.1	Osteoarthritis; localized || id:ukb-saige-740.1	CD25++ CD45RA+ CD4 not regulatory T cell %CD4+ T cell || id:ebi-a-GCST90001508	Weighted mode	4	0.0231496734683344	0.0233466308388436	0.394505	-0.0226097	0.0689090699124679	1.02341970686148	0.977643961303423	1.0713387877894	0.974498079964075
ebi-a-GCST90001509	ukb-saige-740.1	Osteoarthritis; localized || id:ukb-saige-740.1	CD25++ CD45RA+ CD4 not regulatory T cell %T cell || id:ebi-a-GCST90001509	Inverse variance weighted	4	0.0292806837274489	0.0194973644500518	0.133155	-0.00893415	0.0674955180495505	1.02971357776199	0.991105640341195	1.06982546468243	1
ebi-a-GCST90001509	ukb-saige-740.1	Osteoarthritis; localized || id:ukb-saige-740.1	CD25++ CD45RA+ CD4 not regulatory T cell %T cell || id:ebi-a-GCST90001509	Bayesian Weighted Mendelian Randomization	4	0.0297192314900515	0.020449256914814	0.146136	-0.0103613	0.0697997750430868	1.03016525538151	0.989692181417221	1.07229345984685	1
ebi-a-GCST90001509	ukb-saige-740.1	Osteoarthritis; localized || id:ukb-saige-740.1	CD25++ CD45RA+ CD4 not regulatory T cell %T cell || id:ebi-a-GCST90001509	MR Egger	4	0.0108233123538434	0.0268929328339616	0.726286	-0.0418868	0.0635334607084081	1.01088209628653	0.95897829625156	1.06559514077323	0.998524067790455
ebi-a-GCST90001509	ukb-saige-740.1	Osteoarthritis; localized || id:ukb-saige-740.1	CD25++ CD45RA+ CD4 not regulatory T cell %T cell || id:ebi-a-GCST90001509	Weighted median	4	0.0237370686748613	0.0225034339192226	0.291508	-0.0203697	0.0678437991565377	1.02402103528298	0.979836398257893	1.07019812957186	0.974299104969666
ebi-a-GCST90001509	ukb-saige-740.1	Osteoarthritis; localized || id:ukb-saige-740.1	CD25++ CD45RA+ CD4 not regulatory T cell %T cell || id:ebi-a-GCST90001509	Weighted mode	4	0.0237860438284086	0.0249170385526781	0.4102	-0.0250514	0.0726234393916577	1.02407118809853	0.975259829458267	1.0753255354279	0.974498079964075
ebi-a-GCST90001514	ukb-saige-740.1	Osteoarthritis; localized || id:ukb-saige-740.1	Hematopoietic Stem Cell Absolute Count || id:ebi-a-GCST90001514	Inverse variance weighted	2	0.00654651932091888	0.0227045331269432	0.77309	-0.0379544	0.0510474042497276	1.00656799461576	0.962756874713473	1.05237277904282	1
ebi-a-GCST90001514	ukb-saige-740.1	Osteoarthritis; localized || id:ukb-saige-740.1	Hematopoietic Stem Cell Absolute Count || id:ebi-a-GCST90001514	Bayesian Weighted Mendelian Randomization	2	0.00672836020508394	0.0232219023337114	0.772014	-0.0387866	0.0522432887791583	1.00675104647253	0.961955999075747	1.05363204818864	1
ebi-a-GCST90001515	ieu-a-1169	Hip osteoarthritis || id:ieu-a-1169	Immature Myeloid-Derived Suppressor Cells Absolute Count || id:ebi-a-GCST90001515	Wald ratio	1	-0.0513019	0.0724179786693753	0.478688	-0.193241	0.0906373082783139	0.949991796285616	0.824283159358129	1.09487183228727	1
ebi-a-GCST90001515	ieu-a-1171	Knee osteoarthritis || id:ieu-a-1171	Immature Myeloid-Derived Suppressor Cells Absolute Count || id:ebi-a-GCST90001515	Wald ratio	1	0.0502859319451498	0.0695863382427628	0.469901	-0.0861033	0.186675154900965	1.05157173134401	0.917499456879381	1.20523570653974	1
ebi-a-GCST90001515	ukb-saige-740.1	Osteoarthritis; localized || id:ukb-saige-740.1	Immature Myeloid-Derived Suppressor Cells Absolute Count || id:ebi-a-GCST90001515	Inverse variance weighted	2	0.0376169639082797	0.0250674595685234	0.133451	-0.0115153	0.0867491846625856	1.03833343751656	0.988550789965668	1.09062310040985	1
ebi-a-GCST90001515	ukb-saige-740.1	Osteoarthritis; localized || id:ukb-saige-740.1	Immature Myeloid-Derived Suppressor Cells Absolute Count || id:ebi-a-GCST90001515	Bayesian Weighted Mendelian Randomization	2	0.0378179836316145	0.0255051345214182	0.138138	-0.0121721	0.0878080472935941	1.03854218399728	0.9879017000799	1.09177853206913	1
ebi-a-GCST90001516	ieu-a-1169	Hip osteoarthritis || id:ieu-a-1169	Immature Myeloid-Derived Suppressor Cells %CD33dim HLA DR- CD66b- || id:ebi-a-GCST90001516	Wald ratio	1	-0.0801059	0.113077716098335	0.478688	-0.301738	0.14152645519429	0.923018622747401	0.739531654915903	1.1520309810611	1
ebi-a-GCST90001516	ieu-a-1171	Knee osteoarthritis || id:ieu-a-1171	Immature Myeloid-Derived Suppressor Cells %CD33dim HLA DR- CD66b- || id:ebi-a-GCST90001516	Wald ratio	1	0.0785194290245837	0.108656225218081	0.469901	-0.134447	0.291485630452022	1.08168437103035	0.874199409172189	1.33841440094233	1
ebi-a-GCST90001516	ukb-saige-740.1	Osteoarthritis; localized || id:ukb-saige-740.1	Immature Myeloid-Derived Suppressor Cells %CD33dim HLA DR- CD66b- || id:ebi-a-GCST90001516	Inverse variance weighted	2	0.0286268204584651	0.0305336811577646	0.348476	-0.0312192	0.0884728355276837	1.02904050594837	0.969263092543295	1.09250457489711	1
ebi-a-GCST90001516	ukb-saige-740.1	Osteoarthritis; localized || id:ukb-saige-740.1	Immature Myeloid-Derived Suppressor Cells %CD33dim HLA DR- CD66b- || id:ebi-a-GCST90001516	Bayesian Weighted Mendelian Randomization	2	0.0303073296457727	0.0320399295248678	0.344187	-0.0324909	0.0931055915145135	1.0307712718494	0.968031227682841	1.09757762403316	1
ebi-a-GCST90001517	ieu-a-1169	Hip osteoarthritis || id:ieu-a-1169	CD33+ HLA DR+ Absolute Count || id:ebi-a-GCST90001517	Wald ratio	1	-0.106117	0.079728354978355	0.183197	-0.262384	0.0501509632034632	0.89931976998565	0.769215443349447	1.05142981160822	1
ebi-a-GCST90001517	ieu-a-1170	Knee and hip osteoarthritis || id:ieu-a-1170	CD33+ HLA DR+ Absolute Count || id:ebi-a-GCST90001517	Wald ratio	1	-0.0269219	0.0612410714285714	0.660223	-0.146954	0.0931106114718615	0.973437275173077	0.863333354423293	1.09758313383985	1
ebi-a-GCST90001517	ieu-a-1171	Knee osteoarthritis || id:ieu-a-1171	CD33+ HLA DR+ Absolute Count || id:ebi-a-GCST90001517	Wald ratio	1	0.0546609848484849	0.0846214826839827	0.518314	-0.111197	0.220519090909091	1.05618249210685	0.894762354904141	1.24672372560035	1
ebi-a-GCST90001517	ukb-saige-740.1	Osteoarthritis; localized || id:ukb-saige-740.1	CD33+ HLA DR+ Absolute Count || id:ebi-a-GCST90001517	Wald ratio	1	0.0487012987012987	0.0324675324675325	0.133614	-0.0149351	0.112337662337662	1.0499066954043	0.985175909987767	1.11889060408355	1
ebi-a-GCST90001518	ieu-a-1169	Hip osteoarthritis || id:ieu-a-1169	CD33+ HLA DR+ CD14- Absolute Count || id:ebi-a-GCST90001518	Wald ratio	1	-0.104117	0.0782256437483409	0.183197	-0.257439	0.0492057233873109	0.901120276223178	0.773028934154537	1.0504364278533	1
ebi-a-GCST90001518	ieu-a-1170	Knee and hip osteoarthritis || id:ieu-a-1170	CD33+ HLA DR+ CD14- Absolute Count || id:ebi-a-GCST90001518	Wald ratio	1	-0.0264145	0.0600868064773029	0.660223	-0.144185	0.0913556729492965	0.97393134281589	0.865727912625261	1.0956586321016	1
ebi-a-GCST90001518	ieu-a-1171	Knee osteoarthritis || id:ieu-a-1171	CD33+ HLA DR+ CD14- Absolute Count || id:ebi-a-GCST90001518	Wald ratio	1	0.053630740642421	0.0830265463233342	0.518314	-0.109101	0.216362771436156	1.05509492653907	0.896639592138494	1.24155269716946	1
ebi-a-GCST90001518	ukb-saige-740.1	Osteoarthritis; localized || id:ukb-saige-740.1	CD33+ HLA DR+ CD14- Absolute Count || id:ebi-a-GCST90001518	Wald ratio	1	0.0477833820015928	0.0318555880010619	0.133614	-0.0146536	0.110220334483674	1.04894341069065	0.985453270579114	1.11652405210929	1
ebi-a-GCST90001519	ukb-saige-740.1	Osteoarthritis; localized || id:ukb-saige-740.1	CD33+ HLA DR+ CD14- %CD33+ HLA DR+ || id:ebi-a-GCST90001519	Wald ratio	1	0.0703324808184143	0.0383631713554987	0.066753	-0.00485934	0.145524296675192	1.07286482893805	0.99515245242933	1.15665	1
ebi-a-GCST90001520	ieu-a-1169	Hip osteoarthritis || id:ieu-a-1169	CD33+ HLA DR+ CD14dim Absolute Count || id:ebi-a-GCST90001520	Wald ratio	1	-0.119648	0.0898950579621721	0.183197	-0.295843	0.0565460524710189	0.88723245597649	0.743904528165922	1.05817534526756	1
ebi-a-GCST90001520	ieu-a-1170	Knee and hip osteoarthritis || id:ieu-a-1170	CD33+ HLA DR+ CD14dim Absolute Count || id:ebi-a-GCST90001520	Wald ratio	1	-0.0303549	0.0690503355704698	0.660223	-0.165694	0.104983776693106	0.970101201944831	0.847305860823672	1.11069259110277	1
ebi-a-GCST90001520	ieu-a-1171	Knee osteoarthritis || id:ieu-a-1171	CD33+ HLA DR+ CD14dim Absolute Count || id:ebi-a-GCST90001520	Wald ratio	1	0.0616311775472849	0.0954121415497255	0.518314	-0.125377	0.248638974984747	1.06357000388296	0.882164599278008	1.28227901469339	1
ebi-a-GCST90001520	ukb-saige-740.1	Osteoarthritis; localized || id:ukb-saige-740.1	CD33+ HLA DR+ CD14dim Absolute Count || id:ebi-a-GCST90001520	Inverse variance weighted	2	0.0437736031866439	0.0325419555692094	0.178579	-0.0200086	0.107555836102294	1.04474580099182	0.980190214494331	1.11355303547192	1
ebi-a-GCST90001520	ukb-saige-740.1	Osteoarthritis; localized || id:ukb-saige-740.1	CD33+ HLA DR+ CD14dim Absolute Count || id:ebi-a-GCST90001520	Bayesian Weighted Mendelian Randomization	2	0.04435013768291	0.0334946949900353	0.185472	-0.0212995	0.109999739863379	1.04534830665188	0.978925767157533	1.1162777800741	1
ebi-a-GCST90001521	ukb-saige-740.1	Osteoarthritis; localized || id:ukb-saige-740.1	CD33+ HLA DR+ CD14dim %CD33+ HLA DR+ || id:ebi-a-GCST90001521	Wald ratio	1	0.0104501607717042	0.0321543408360129	0.745181	-0.0525723	0.0734726688102894	1.01050495440287	0.948785676522157	1.07623912137432	1
ebi-a-GCST90001522	ukb-saige-740.1	Osteoarthritis; localized || id:ukb-saige-740.1	CD33- HLA DR- Absolute Count || id:ebi-a-GCST90001522	Wald ratio	1	-0.0577731	0.0577731092436975	0.317311	-0.171008	0.0554621848739496	0.943864077178168	0.842814490967148	1.05702904463008	1
ebi-a-GCST90001523	ukb-saige-740.1	Osteoarthritis; localized || id:ukb-saige-740.1	CD33- HLA DR+ Absolute Count || id:ebi-a-GCST90001523	Wald ratio	1	-0.0473747	0.0473746545598105	0.317311	-0.140229	0.0454796683774181	0.953730011348779	0.869159194714822	1.04652972675022	1
ebi-a-GCST90001524	ieu-a-1169	Hip osteoarthritis || id:ieu-a-1169	Granulocytic Myeloid-Derived Suppressor Cells Absolute Count || id:ebi-a-GCST90001524	Wald ratio	1	-0.145965	0.109667286937105	0.183197	-0.360913	0.0689832378116859	0.864188256378938	0.697039967990071	1.07141824968336	1
ebi-a-GCST90001524	ieu-a-1170	Knee and hip osteoarthritis || id:ieu-a-1170	Granulocytic Myeloid-Derived Suppressor Cells Absolute Count || id:ebi-a-GCST90001524	Wald ratio	1	-0.0370314	0.0842378116858951	0.660223	-0.202137	0.128074737625605	0.963645902143295	0.81698259803552	1.13663794914416	1
ebi-a-GCST90001524	ieu-a-1171	Knee osteoarthritis || id:ieu-a-1171	Granulocytic Myeloid-Derived Suppressor Cells Absolute Count || id:ebi-a-GCST90001524	Wald ratio	1	0.0751868254558988	0.116397841458876	0.518314	-0.152953	0.303326594715296	1.0780855458948	0.858170103082294	1.35435671796624	1
ebi-a-GCST90001524	ukb-saige-740.1	Osteoarthritis; localized || id:ukb-saige-740.1	Granulocytic Myeloid-Derived Suppressor Cells Absolute Count || id:ebi-a-GCST90001524	Inverse variance weighted	2	0.078204922253522	0.0383366617921101	0.0413552	0.00306506514098609	0.153344779366058	1.08134422746304	1.00306976725601	1.16572682822092	0.900659323502345
ebi-a-GCST90001524	ukb-saige-740.1	Osteoarthritis; localized || id:ukb-saige-740.1	Granulocytic Myeloid-Derived Suppressor Cells Absolute Count || id:ebi-a-GCST90001524	Bayesian Weighted Mendelian Randomization	2	0.0798455731497999	0.0406430163265975	0.0494654	0.00018526114966877	0.159505885149931	1.0831197919815	1.00018527831158	1.17293116507618	1
ebi-a-GCST90001525	ieu-a-1170	Knee and hip osteoarthritis || id:ieu-a-1170	CD33dim HLA DR+ CD11b+ Absolute Count || id:ebi-a-GCST90001525	Wald ratio	1	0.0380218952999618	0.0772514329384792	0.622589	-0.113391	0.189434703859381	1.03875397645941	0.892801583913986	1.20856620670398	1
ebi-a-GCST90001525	ieu-a-1171	Knee osteoarthritis || id:ieu-a-1171	CD33dim HLA DR+ CD11b+ Absolute Count || id:ebi-a-GCST90001525	Wald ratio	1	0.112949178448605	0.113696217042415	0.320501	-0.109895	0.335793763851739	1.11957503296265	0.895927838217228	1.39905046027758	1
ebi-a-GCST90001525	ukb-saige-740.1	Osteoarthritis; localized || id:ukb-saige-740.1	CD33dim HLA DR+ CD11b+ Absolute Count || id:ebi-a-GCST90001525	Wald ratio	1	-0.0420329	0.0420328620557891	0.317311	-0.124417	0.0403515475735575	0.958838270658004	0.883011308382367	1.04117673301679	1
ebi-a-GCST90001526	ieu-a-1171	Knee osteoarthritis || id:ieu-a-1171	CD33dim HLA DR+ CD11b+ %CD33dim HLA DR+ || id:ebi-a-GCST90001526	Inverse variance weighted	3	0.0175574874167495	0.0424847261849957	0.679412	-0.0657126	0.100827550739341	1.01771252613325	0.936399969529113	1.10608588162316	1
ebi-a-GCST90001526	ieu-a-1171	Knee osteoarthritis || id:ieu-a-1171	CD33dim HLA DR+ CD11b+ %CD33dim HLA DR+ || id:ebi-a-GCST90001526	Bayesian Weighted Mendelian Randomization	3	0.018180272185872	0.0430278139590586	0.672643	-0.0661542	0.102514787545627	1.01834653940028	0.935986483631093	1.10795368570435	1
ebi-a-GCST90001526	ieu-a-1171	Knee osteoarthritis || id:ieu-a-1171	CD33dim HLA DR+ CD11b+ %CD33dim HLA DR+ || id:ebi-a-GCST90001526	MR Egger	3	0.193483807730961	0.235052709717637	0.561561	-0.26722	0.654187118777529	1.21346973756396	0.765505022131884	1.92357824104497	0.998524067790455
ebi-a-GCST90001526	ieu-a-1171	Knee osteoarthritis || id:ieu-a-1171	CD33dim HLA DR+ CD11b+ %CD33dim HLA DR+ || id:ebi-a-GCST90001526	Weighted median	3	0.0293466449742934	0.0455608104217583	0.519497	-0.0599525	0.11864583340094	1.02978150119361	0.941809227538211	1.1259710663193	0.974299104969666
ebi-a-GCST90001526	ieu-a-1171	Knee osteoarthritis || id:ieu-a-1171	CD33dim HLA DR+ CD11b+ %CD33dim HLA DR+ || id:ebi-a-GCST90001526	Weighted mode	3	0.0411459265078055	0.0519866159989483	0.511626	-0.0607478	0.143039693865744	1.04200415047831	0.941060506877605	1.15377559857079	0.974498079964075
ebi-a-GCST90001526	ukb-saige-740.1	Osteoarthritis; localized || id:ukb-saige-740.1	CD33dim HLA DR+ CD11b+ %CD33dim HLA DR+ || id:ebi-a-GCST90001526	Inverse variance weighted	3	-0.00516516	0.0161054297435116	0.748431	-0.0367318	0.0264014793565991	0.994848153576226	0.963934622901805	1.02675308590389	1
ebi-a-GCST90001526	ukb-saige-740.1	Osteoarthritis; localized || id:ukb-saige-740.1	CD33dim HLA DR+ CD11b+ %CD33dim HLA DR+ || id:ebi-a-GCST90001526	Bayesian Weighted Mendelian Randomization	3	-0.0053109	0.0162768874285769	0.744209	-0.0372136	0.0265917978511744	0.994703176395435	0.963470315271712	1.02694851460175	1
ebi-a-GCST90001526	ukb-saige-740.1	Osteoarthritis; localized || id:ukb-saige-740.1	CD33dim HLA DR+ CD11b+ %CD33dim HLA DR+ || id:ebi-a-GCST90001526	MR Egger	3	-0.106665	0.088124415440103	0.439588	-0.279388	0.0660593356068994	0.898827162160135	0.756246140653426	1.06829010292706	0.998524067790455
ebi-a-GCST90001526	ukb-saige-740.1	Osteoarthritis; localized || id:ukb-saige-740.1	CD33dim HLA DR+ CD11b+ %CD33dim HLA DR+ || id:ebi-a-GCST90001526	Weighted median	3	-0.00284625	0.0176036066745376	0.871553	-0.0373493	0.0316568197272287	0.997157797372588	0.963339564296378	1.03216322646024	0.974299104969666
ebi-a-GCST90001526	ukb-saige-740.1	Osteoarthritis; localized || id:ukb-saige-740.1	CD33dim HLA DR+ CD11b+ %CD33dim HLA DR+ || id:ebi-a-GCST90001526	Weighted mode	3	-0.0199101	0.018988540520758	0.404418	-0.0571276	0.0173074446201195	0.980286802225528	0.944473514531705	1.0174580862588	0.974498079964075
ebi-a-GCST90001527	ukb-saige-740.1	Osteoarthritis; localized || id:ukb-saige-740.1	CD33dim HLA DR+ CD11b- Absolute Count || id:ebi-a-GCST90001527	Inverse variance weighted	2	-0.0262217	0.034062994553489	0.441418	-0.0929852	0.0405417393830121	0.974119074295427	0.911206986727959	1.04137	1
ebi-a-GCST90001527	ukb-saige-740.1	Osteoarthritis; localized || id:ukb-saige-740.1	CD33dim HLA DR+ CD11b- Absolute Count || id:ebi-a-GCST90001527	Bayesian Weighted Mendelian Randomization	2	-0.026238	0.0347485205602939	0.4502	-0.0943451	0.0418691045500049	0.974103229592072	0.909968681455595	1.04275797754256	1
ebi-a-GCST90001528	ieu-a-1171	Knee osteoarthritis || id:ieu-a-1171	CD33dim HLA DR+ CD11b- %CD33dim HLA DR+ || id:ebi-a-GCST90001528	Inverse variance weighted	3	-0.0178248	0.0426662320439283	0.676113	-0.101451	0.0658009883627552	0.982333096069614	0.903525775144971	1.06801414877056	1
ebi-a-GCST90001528	ieu-a-1171	Knee osteoarthritis || id:ieu-a-1171	CD33dim HLA DR+ CD11b- %CD33dim HLA DR+ || id:ebi-a-GCST90001528	Bayesian Weighted Mendelian Randomization	3	-0.0184593	0.0432172881052919	0.669287	-0.103165	0.0662466183737687	0.981710062448158	0.901977998612656	1.06849019398957	1
ebi-a-GCST90001528	ieu-a-1171	Knee osteoarthritis || id:ieu-a-1171	CD33dim HLA DR+ CD11b- %CD33dim HLA DR+ || id:ebi-a-GCST90001528	MR Egger	3	-0.184472	0.227994176573465	0.566927	-0.63134	0.262396706558306	0.831543322963285	0.531878358293191	1.30004217540218	0.998524067790455
ebi-a-GCST90001528	ieu-a-1171	Knee osteoarthritis || id:ieu-a-1171	CD33dim HLA DR+ CD11b- %CD33dim HLA DR+ || id:ebi-a-GCST90001528	Weighted median	3	-0.0297535	0.0458835775546696	0.516689	-0.119685	0.0601782759370569	0.970684742845486	0.887199551847652	1.06202586332551	0.974299104969666
ebi-a-GCST90001528	ieu-a-1171	Knee osteoarthritis || id:ieu-a-1171	CD33dim HLA DR+ CD11b- %CD33dim HLA DR+ || id:ebi-a-GCST90001528	Weighted mode	3	-0.0410626	0.0494134905737371	0.493383	-0.137913	0.055787825667758	0.959769031306061	0.871174430639633	1.05737331245804	0.974498079964075
ebi-a-GCST90001528	ukb-saige-740.1	Osteoarthritis; localized || id:ukb-saige-740.1	CD33dim HLA DR+ CD11b- %CD33dim HLA DR+ || id:ebi-a-GCST90001528	Inverse variance weighted	3	0.00532140235437996	0.016167552124565	0.742049	-0.026367	0.0370098045185273	1.00533558616398	0.973977574424228	1.03770319496848	1
ebi-a-GCST90001528	ukb-saige-740.1	Osteoarthritis; localized || id:ukb-saige-740.1	CD33dim HLA DR+ CD11b- %CD33dim HLA DR+ || id:ebi-a-GCST90001528	Bayesian Weighted Mendelian Randomization	3	0.00547085528438071	0.0163411644048024	0.737784	-0.0265578	0.0374995375177934	1.0054858477412	0.97379173080256	1.03821151692736	1
ebi-a-GCST90001528	ukb-saige-740.1	Osteoarthritis; localized || id:ukb-saige-740.1	CD33dim HLA DR+ CD11b- %CD33dim HLA DR+ || id:ebi-a-GCST90001528	MR Egger	3	0.102451433391264	0.0849022227451036	0.440542	-0.0639569	0.268859789971667	1.10788349445899	0.93804540666498	1.30847166733479	0.998524067790455
ebi-a-GCST90001528	ukb-saige-740.1	Osteoarthritis; localized || id:ukb-saige-740.1	CD33dim HLA DR+ CD11b- %CD33dim HLA DR+ || id:ebi-a-GCST90001528	Weighted median	3	0.00298907090977435	0.0169372988243578	0.859918	-0.030208	0.0361861766055157	1.00299354263655	0.970243668117888	1.03684886552477	0.974299104969666
ebi-a-GCST90001528	ukb-saige-740.1	Osteoarthritis; localized || id:ukb-saige-740.1	CD33dim HLA DR+ CD11b- %CD33dim HLA DR+ || id:ebi-a-GCST90001528	Weighted mode	3	0.0199287622137297	0.0202603127764794	0.429	-0.0197815	0.0596389752556293	1.02012866573035	0.980412918325718	1.06145326646854	0.974498079964075
ebi-a-GCST90001530	ieu-a-1169	Hip osteoarthritis || id:ieu-a-1169	Monocytic Myeloid-Derived Suppressor Cells Absolute Count || id:ebi-a-GCST90001530	Inverse variance weighted	2	-0.0507158	0.0593937607603096	0.393166	-0.167128	0.0656960038402102	0.950548809241537	0.846091695325139	1.06790202970056	1
ebi-a-GCST90001530	ieu-a-1169	Hip osteoarthritis || id:ieu-a-1169	Monocytic Myeloid-Derived Suppressor Cells Absolute Count || id:ebi-a-GCST90001530	Bayesian Weighted Mendelian Randomization	2	-0.0511008	0.0603221076501714	0.396921	-0.169332	0.0671305176648347	0.950182874604531	0.844228451125236	1.06943504923148	1
ebi-a-GCST90001530	ieu-a-1170	Knee and hip osteoarthritis || id:ieu-a-1170	Monocytic Myeloid-Derived Suppressor Cells Absolute Count || id:ebi-a-GCST90001530	Inverse variance weighted	2	-0.0374057	0.0462398324336372	0.418544	-0.128036	0.0532243860003679	0.963285265137775	0.879821918667107	1.05466627091686	1
ebi-a-GCST90001530	ieu-a-1170	Knee and hip osteoarthritis || id:ieu-a-1170	Monocytic Myeloid-Derived Suppressor Cells Absolute Count || id:ebi-a-GCST90001530	Bayesian Weighted Mendelian Randomization	2	-0.0377085	0.0469513526492516	0.421894	-0.129733	0.0543161755990626	0.962993636122718	0.878329802342743	1.05581837339385	1
ebi-a-GCST90001530	ieu-a-1171	Knee osteoarthritis || id:ieu-a-1171	Monocytic Myeloid-Derived Suppressor Cells Absolute Count || id:ebi-a-GCST90001530	Inverse variance weighted	2	0.0185624423663825	0.058515459399635	0.751074	-0.0961279	0.133252742789667	1.01873579545735	0.90834786905017	1.14253873026789	1
ebi-a-GCST90001530	ieu-a-1171	Knee osteoarthritis || id:ieu-a-1171	Monocytic Myeloid-Derived Suppressor Cells Absolute Count || id:ebi-a-GCST90001530	Bayesian Weighted Mendelian Randomization	2	0.018743195631036	0.059442790567522	0.752523	-0.0977647	0.135251065143379	1.01891995192114	0.906862287027803	1.1448241737184	1
ebi-a-GCST90001530	ukb-saige-740.1	Osteoarthritis; localized || id:ukb-saige-740.1	Monocytic Myeloid-Derived Suppressor Cells Absolute Count || id:ebi-a-GCST90001530	Inverse variance weighted	3	0.0333233790337842	0.0262958232758373	0.205066	-0.0182164	0.0848631926544253	1.03388482186314	0.981948481743517	1.08856813239431	1
ebi-a-GCST90001530	ukb-saige-740.1	Osteoarthritis; localized || id:ukb-saige-740.1	Monocytic Myeloid-Derived Suppressor Cells Absolute Count || id:ebi-a-GCST90001530	Bayesian Weighted Mendelian Randomization	3	0.0314403360471066	0.0321972608353764	0.328821	-0.0316663	0.0945469672844442	1.03194	0.968829831315843	1.09916078651799	1
ebi-a-GCST90001530	ukb-saige-740.1	Osteoarthritis; localized || id:ukb-saige-740.1	Monocytic Myeloid-Derived Suppressor Cells Absolute Count || id:ebi-a-GCST90001530	MR Egger	3	0.144243381170439	0.0879337429370377	0.348526	-0.0281068	0.316593517327033	1.15516521977817	0.972284565035389	1.37244458358401	0.998524067790455
ebi-a-GCST90001530	ukb-saige-740.1	Osteoarthritis; localized || id:ukb-saige-740.1	Monocytic Myeloid-Derived Suppressor Cells Absolute Count || id:ebi-a-GCST90001530	Weighted median	3	0.0328242571431203	0.0258915292138784	0.204884	-0.0179231	0.083571654402322	1.03336891607676	0.982236524042341	1.08716311252506	0.974299104969666
ebi-a-GCST90001530	ukb-saige-740.1	Osteoarthritis; localized || id:ukb-saige-740.1	Monocytic Myeloid-Derived Suppressor Cells Absolute Count || id:ebi-a-GCST90001530	Weighted mode	3	0.0557624228919587	0.0252060437297052	0.157446	0.00635857718173653	0.105166268602181	1.05734645258201	1.00637883584963	1.1108953020101	0.974498079964075
ebi-a-GCST90001531	ukb-saige-740.1	Osteoarthritis; localized || id:ukb-saige-740.1	CD33dim HLA DR- Absolute Count || id:ebi-a-GCST90001531	Inverse variance weighted	3	0.0110270162393404	0.01658111475124	0.506028	-0.021472	0.0435260011517709	1.01108803787216	0.978756912939611	1.04448715182792	1
ebi-a-GCST90001531	ukb-saige-740.1	Osteoarthritis; localized || id:ukb-saige-740.1	CD33dim HLA DR- Absolute Count || id:ebi-a-GCST90001531	Bayesian Weighted Mendelian Randomization	3	0.00828841881651264	0.0151198007307841	0.583566	-0.0213464	0.0379232282488495	1.0083228628562	0.978879831049021	1.03865149072379	1
ebi-a-GCST90001531	ukb-saige-740.1	Osteoarthritis; localized || id:ukb-saige-740.1	CD33dim HLA DR- Absolute Count || id:ebi-a-GCST90001531	MR Egger	3	0.0037484818547614	0.0351226917142962	0.932313	-0.065092	0.072588957614782	1.00375551619949	0.936981262846978	1.07528845693199	0.998524067790455
ebi-a-GCST90001531	ukb-saige-740.1	Osteoarthritis; localized || id:ukb-saige-740.1	CD33dim HLA DR- Absolute Count || id:ebi-a-GCST90001531	Weighted median	3	0.0128059531657401	0.0133518139083865	0.3375	-0.0133636	0.0389755084261777	1.01288830052066	0.986725294402705	1.03974501834644	0.974299104969666
ebi-a-GCST90001531	ukb-saige-740.1	Osteoarthritis; localized || id:ukb-saige-740.1	CD33dim HLA DR- Absolute Count || id:ebi-a-GCST90001531	Weighted mode	3	0.0121607570925185	0.0136690721916299	0.467519	-0.0146306	0.038952138588113	1.01223499974277	0.98547588312558	1.03972071995766	0.974498079964075
ebi-a-GCST90001532	ieu-a-1169	Hip osteoarthritis || id:ieu-a-1169	Basophil Absolute Count || id:ebi-a-GCST90001532	Wald ratio	1	-0.0807841	0.0606953656024717	0.183197	-0.199747	0.0381787765190525	0.922392777604449	0.818937871776987	1.03892	1
ebi-a-GCST90001532	ieu-a-1170	Knee and hip osteoarthritis || id:ieu-a-1170	Basophil Absolute Count || id:ebi-a-GCST90001532	Wald ratio	1	-0.020495	0.046621421215242	0.660223	-0.111873	0.0708829701338826	0.979713579895639	0.894157807410522	1.07345559215282	1
ebi-a-GCST90001532	ieu-a-1171	Knee osteoarthritis || id:ieu-a-1171	Basophil Absolute Count || id:ebi-a-GCST90001532	Wald ratio	1	0.0416121524201854	0.0644203913491246	0.518314	-0.0846518	0.16787611946447	1.04249007308013	0.91883215262996	1.18279007690351	1
ebi-a-GCST90001532	ukb-saige-740.1	Osteoarthritis; localized || id:ukb-saige-740.1	Basophil Absolute Count || id:ebi-a-GCST90001532	Inverse variance weighted	3	0.00949096907552202	0.0147518899696377	0.519982	-0.0194227	0.038404673416012	1.00953615114995	0.980764670783655	1.03915166485791	1
ebi-a-GCST90001532	ukb-saige-740.1	Osteoarthritis; localized || id:ukb-saige-740.1	Basophil Absolute Count || id:ebi-a-GCST90001532	Bayesian Weighted Mendelian Randomization	3	0.00785576885133708	0.0142179313670509	0.580588	-0.0200114	0.0357229143307568	1.00788670636304	0.980187522014434	1.03636864380364	1
ebi-a-GCST90001532	ukb-saige-740.1	Osteoarthritis; localized || id:ukb-saige-740.1	Basophil Absolute Count || id:ebi-a-GCST90001532	MR Egger	3	0.00580547777840315	0.0323287052666378	0.886884	-0.0575588	0.0691697401010132	1.0058223622228	0.944066392242653	1.07161809027454	0.998524067790455
ebi-a-GCST90001532	ukb-saige-740.1	Osteoarthritis; localized || id:ukb-saige-740.1	Basophil Absolute Count || id:ebi-a-GCST90001532	Weighted median	3	0.0120301842251098	0.0130829147171233	0.357816	-0.0136123	0.0376726970706714	1.01210283794492	0.986479900167647	1.03839130873531	0.974299104969666
ebi-a-GCST90001532	ukb-saige-740.1	Osteoarthritis; localized || id:ukb-saige-740.1	Basophil Absolute Count || id:ebi-a-GCST90001532	Weighted mode	3	0.0125188551884543	0.0137405755078984	0.458423	-0.0144127	0.0394503831839352	1.01259754407816	0.985690692575357	1.04023888426311	0.974498079964075
ebi-a-GCST90001533	ieu-a-1169	Hip osteoarthritis || id:ieu-a-1169	Basophil %CD33dim HLA DR- CD66b- || id:ebi-a-GCST90001533	Inverse variance weighted	2	-0.0524951	0.0539965133941685	0.330954	-0.158328	0.0533381061781848	0.948859008337144	0.853569571979438	1.0547862145726	1
ebi-a-GCST90001533	ieu-a-1169	Hip osteoarthritis || id:ieu-a-1169	Basophil %CD33dim HLA DR- CD66b- || id:ebi-a-GCST90001533	Bayesian Weighted Mendelian Randomization	2	-0.0520085	0.0561640741470944	0.354441	-0.16209	0.0580731089368821	0.949320819993929	0.850364615791734	1.05979247317914	1
ebi-a-GCST90001533	ieu-a-1170	Knee and hip osteoarthritis || id:ieu-a-1170	Basophil %CD33dim HLA DR- CD66b- || id:ebi-a-GCST90001533	Inverse variance weighted	2	-0.00924265	0.0395736668988974	0.81533	-0.086807	0.0683217403949281	0.990799935241336	0.916854000351998	1.07070974364222	1
ebi-a-GCST90001533	ieu-a-1170	Knee and hip osteoarthritis || id:ieu-a-1170	Basophil %CD33dim HLA DR- CD66b- || id:ebi-a-GCST90001533	Bayesian Weighted Mendelian Randomization	2	-0.00928335	0.0399520099478242	0.816257	-0.0875893	0.0690225940915954	0.990759611813152	0.916137070788839	1.07146041754968	1
ebi-a-GCST90001533	ieu-a-1171	Knee osteoarthritis || id:ieu-a-1171	Basophil %CD33dim HLA DR- CD66b- || id:ebi-a-GCST90001533	Inverse variance weighted	2	0.0327532047315682	0.0553151610459346	0.55377	-0.0756645	0.1411709203816	1.03329549533165	0.927127195441044	1.15162146674465	1
ebi-a-GCST90001533	ieu-a-1171	Knee osteoarthritis || id:ieu-a-1171	Basophil %CD33dim HLA DR- CD66b- || id:ebi-a-GCST90001533	Bayesian Weighted Mendelian Randomization	2	0.0329167641671172	0.0558666623745434	0.555726	-0.0765819	0.142415422421222	1.03346451438157	0.926277054568951	1.15305555418617	1
ebi-a-GCST90001533	ukb-saige-740.1	Osteoarthritis; localized || id:ukb-saige-740.1	Basophil %CD33dim HLA DR- CD66b- || id:ebi-a-GCST90001533	Inverse variance weighted	3	0.0286143974333167	0.0201811783203247	0.156227	-0.0109407	0.0681695069411531	1.02902772223169	0.989118919845809	1.07054675820619	1
ebi-a-GCST90001533	ukb-saige-740.1	Osteoarthritis; localized || id:ukb-saige-740.1	Basophil %CD33dim HLA DR- CD66b- || id:ebi-a-GCST90001533	Bayesian Weighted Mendelian Randomization	3	0.028980004170917	0.0205264689211995	0.157998	-0.0112519	0.069211883256468	1.02940401048268	0.988811190672923	1.07166325259394	1
ebi-a-GCST90001533	ukb-saige-740.1	Osteoarthritis; localized || id:ukb-saige-740.1	Basophil %CD33dim HLA DR- CD66b- || id:ebi-a-GCST90001533	MR Egger	3	0.068583338674783	0.0777111847882042	0.53967	-0.0837306	0.220897260859663	1.07098987610887	0.919678999408417	1.24719528820982	0.998524067790455
ebi-a-GCST90001533	ukb-saige-740.1	Osteoarthritis; localized || id:ukb-saige-740.1	Basophil %CD33dim HLA DR- CD66b- || id:ebi-a-GCST90001533	Weighted median	3	0.0354964337475518	0.0215458064632043	0.099458	-0.00673335	0.0777262144154322	1.03613395300623	0.993289271266208	1.08082670338698	0.974299104969666
ebi-a-GCST90001533	ukb-saige-740.1	Osteoarthritis; localized || id:ukb-saige-740.1	Basophil %CD33dim HLA DR- CD66b- || id:ebi-a-GCST90001533	Weighted mode	3	0.0373006010940422	0.0230150330060467	0.246525	-0.00780886	0.0824100657858937	1.0380049993837	0.992221546370288	1.08590100939358	0.974498079964075
ebi-a-GCST90001534	ieu-a-1169	Hip osteoarthritis || id:ieu-a-1169	CD45RA- CD4+ T cell Absolute Count || id:ebi-a-GCST90001534	Wald ratio	1	-0.0620772	0.176147004323657	0.724526	-0.407325	0.283170920321186	0.939810322970489	0.665427667088877	1.32733201044363	1
ebi-a-GCST90001534	ieu-a-1170	Knee and hip osteoarthritis || id:ieu-a-1170	CD45RA- CD4+ T cell Absolute Count || id:ebi-a-GCST90001534	Wald ratio	1	-0.124785	0.128697961704756	0.332248	-0.377033	0.127462952439778	0.882686613474411	0.685893399639375	1.13594278355292	1
ebi-a-GCST90001534	ieu-a-1171	Knee osteoarthritis || id:ieu-a-1171	CD45RA- CD4+ T cell Absolute Count || id:ebi-a-GCST90001534	Wald ratio	1	-0.188136	0.162584928968499	0.247209	-0.506802	0.13053057442866	0.828502117454771	0.602418828528287	1.13943277686715	1
ebi-a-GCST90001534	ukb-saige-740.1	Osteoarthritis; localized || id:ukb-saige-740.1	CD45RA- CD4+ T cell Absolute Count || id:ebi-a-GCST90001534	Inverse variance weighted	2	0.0125035332574631	0.0229863301126567	0.586472	-0.0325497	0.0575567402782702	1.01258202924733	0.967974365707491	1.05924537082676	1
ebi-a-GCST90001534	ukb-saige-740.1	Osteoarthritis; localized || id:ukb-saige-740.1	CD45RA- CD4+ T cell Absolute Count || id:ebi-a-GCST90001534	Bayesian Weighted Mendelian Randomization	2	0.0129790522082016	0.024164710265859	0.591193	-0.0343838	0.0603418843292852	1.01306364569121	0.966200625082277	1.06219963388428	1
ebi-a-GCST90001536	ukb-saige-740.1	Osteoarthritis; localized || id:ukb-saige-740.1	CD45RA- CD4+ T cell %T cell || id:ebi-a-GCST90001536	Inverse variance weighted	2	0.00817328740501906	0.0237732521578888	0.730995	-0.0384223	0.0547688616344811	1.00820677990428	0.962306485726911	1.05629643582535	1
ebi-a-GCST90001536	ukb-saige-740.1	Osteoarthritis; localized || id:ukb-saige-740.1	CD45RA- CD4+ T cell %T cell || id:ebi-a-GCST90001536	Bayesian Weighted Mendelian Randomization	2	0.00823985278021181	0.0248288181347087	0.73999	-0.0404246	0.0569043363242409	1.00827389380056	0.960381545007239	1.05855454033332	1
ebi-a-GCST90001537	ieu-a-1169	Hip osteoarthritis || id:ieu-a-1169	Central Memory CD4+ T cell Absolute Count || id:ebi-a-GCST90001537	Wald ratio	1	-0.0618417	0.171992541951523	0.719176	-0.398947	0.275263679303916	0.940031679283003	0.671026207667805	1.31687786253064	1
ebi-a-GCST90001537	ieu-a-1170	Knee and hip osteoarthritis || id:ieu-a-1170	Central Memory CD4+ T cell Absolute Count || id:ebi-a-GCST90001537	Wald ratio	1	-0.123074	0.139301429459292	0.376962	-0.396105	0.149956842759478	0.884198265740009	0.67293619496365	1.16178410225039	1
ebi-a-GCST90001537	ieu-a-1171	Knee osteoarthritis || id:ieu-a-1171	Central Memory CD4+ T cell Absolute Count || id:ebi-a-GCST90001537	Wald ratio	1	-0.183709	0.168663144810441	0.276062	-0.514289	0.14687062771908	0.832177819106362	0.597925628431081	1.15820411382892	1
ebi-a-GCST90001537	ukb-saige-740.1	Osteoarthritis; localized || id:ukb-saige-740.1	Central Memory CD4+ T cell Absolute Count || id:ebi-a-GCST90001537	Wald ratio	1	0.0254816656308266	0.0683654443753884	0.709351	-0.108515	0.159477936606588	1.02580909853532	0.897165791305435	1.17289838381677	1
ebi-a-GCST90001538	ieu-a-1169	Hip osteoarthritis || id:ieu-a-1169	Central Memory CD4+ T cell %CD4+ T cell || id:ebi-a-GCST90001538	Wald ratio	1	0.117049246813442	0.165227114716107	0.478688	-0.206796	0.44089439165701	1.12417479035353	0.81318560583506	1.55409656811208	1
ebi-a-GCST90001538	ieu-a-1170	Knee and hip osteoarthritis || id:ieu-a-1170	Central Memory CD4+ T cell %CD4+ T cell || id:ebi-a-GCST90001538	Wald ratio	1	0.0582288528389339	0.119498841251448	0.626063	-0.175989	0.292446581691773	1.05995754224819	0.838627312163746	1.33970117008239	1
ebi-a-GCST90001538	ieu-a-1171	Knee osteoarthritis || id:ieu-a-1171	Central Memory CD4+ T cell %CD4+ T cell || id:ebi-a-GCST90001538	Wald ratio	1	-0.0576497	0.146455967555041	0.693853	-0.344703	0.229404044032445	0.943980610874497	0.708430479062804	1.2578501632028	1
ebi-a-GCST90001538	ukb-saige-740.1	Osteoarthritis; localized || id:ukb-saige-740.1	Central Memory CD4+ T cell %CD4+ T cell || id:ebi-a-GCST90001538	Wald ratio	1	-0.1854	0.0637311703360371	0.00362481	-0.310313	-0.0604867	0.830772101149235	0.733217524354923	0.941306312414081	0.337734099915754
ebi-a-GCST90001540	ieu-a-1169	Hip osteoarthritis || id:ieu-a-1169	Naive CD4+ T cell Absolute Count || id:ebi-a-GCST90001540	Wald ratio	1	-0.0455393	0.149738672768879	0.761033	-0.339027	0.247948530892449	0.955482082218514	0.712463165042598	1.28139397829226	1
ebi-a-GCST90001540	ieu-a-1170	Knee and hip osteoarthritis || id:ieu-a-1170	Naive CD4+ T cell Absolute Count || id:ebi-a-GCST90001540	Wald ratio	1	-0.135281	0.125414645308924	0.280737	-0.381093	0.110532155606407	0.873470825769719	0.683114183516325	1.11687226217958	1
ebi-a-GCST90001540	ieu-a-1171	Knee osteoarthritis || id:ieu-a-1171	Naive CD4+ T cell Absolute Count || id:ebi-a-GCST90001540	Wald ratio	1	-0.0906297	0.14827414187643	0.541047	-0.381247	0.19998756979405	0.91335581986254	0.683009120193898	1.2213875759667	1
ebi-a-GCST90001540	ukb-saige-740.1	Osteoarthritis; localized || id:ukb-saige-740.1	Naive CD4+ T cell Absolute Count || id:ebi-a-GCST90001540	Wald ratio	1	-0.242563	0.0640732265446224	0.000153268	-0.368146	-0.116979	0.784614370978899	0.692015826411431	0.889603514328591	0.102306185747997
ebi-a-GCST90001541	ukb-saige-740.1	Osteoarthritis; localized || id:ukb-saige-740.1	Naive CD4+ T cell %CD4+ T cell || id:ebi-a-GCST90001541	Inverse variance weighted	2	-0.00983895	0.0312313796082074	0.752736	-0.0710525	0.0513745494558324	0.990209289583645	0.931413030214634	1.05271711407323	1
ebi-a-GCST90001541	ukb-saige-740.1	Osteoarthritis; localized || id:ukb-saige-740.1	Naive CD4+ T cell %CD4+ T cell || id:ebi-a-GCST90001541	Bayesian Weighted Mendelian Randomization	2	-0.00982105	0.033541104456193	0.76967	-0.0755616	0.0559195176691633	0.990227021926438	0.927222600921466	1.05751256923509	1
ebi-a-GCST90001542	ukb-saige-740.1	Osteoarthritis; localized || id:ukb-saige-740.1	Effector Memory CD4+ T cell Absolute Count || id:ebi-a-GCST90001542	Wald ratio	1	0.0123013839056894	0.0251153254741158	0.624278	-0.0369247	0.0615274218349564	1.01237735713436	0.963748747203898	1.06345965814419	1
ebi-a-GCST90001543	ukb-saige-740.1	Osteoarthritis; localized || id:ukb-saige-740.1	Effector Memory CD4+ T cell %CD4+ T cell || id:ebi-a-GCST90001543	Inverse variance weighted	2	0.0200960543435123	0.0294867344842645	0.495537	-0.0376979	0.0778900539326708	1.02029933950328	0.963003776834052	1.0810038000196	1
ebi-a-GCST90001543	ukb-saige-740.1	Osteoarthritis; localized || id:ukb-saige-740.1	Effector Memory CD4+ T cell %CD4+ T cell || id:ebi-a-GCST90001543	Bayesian Weighted Mendelian Randomization	2	0.0218240697062435	0.0320846484664313	0.496376	-0.0410618	0.0847099807004488	1.02206395664019	0.959769774713501	1.08840136351953	1
ebi-a-GCST90001544	ukb-saige-740.1	Osteoarthritis; localized || id:ukb-saige-740.1	Effector Memory CD4+ T cell %T cell || id:ebi-a-GCST90001544	Inverse variance weighted	2	0.01886338916536	0.0326961715495796	0.563987	-0.0452211	0.082947885402536	1.01904242687156	0.95578612739607	1.08648518533472	1
ebi-a-GCST90001544	ukb-saige-740.1	Osteoarthritis; localized || id:ukb-saige-740.1	Effector Memory CD4+ T cell %T cell || id:ebi-a-GCST90001544	Bayesian Weighted Mendelian Randomization	2	0.0201032843164525	0.0347992845366413	0.563472	-0.0481033	0.0883098820082694	1.02030671626657	0.953035320695323	1.09232656193597	1
ebi-a-GCST90001545	ukb-saige-740.1	Osteoarthritis; localized || id:ukb-saige-740.1	Terminally Differentiated CD4+ T cell Absolute Count || id:ebi-a-GCST90001545	Wald ratio	1	0.040983606557377	0.0819672131147541	0.617075	-0.119672	0.201639344262295	1.04183502614276	0.887211277979256	1.22340669989011	1
ebi-a-GCST90001546	ukb-saige-740.1	Osteoarthritis; localized || id:ukb-saige-740.1	Terminally Differentiated CD4+ T cell %CD4+ T cell || id:ebi-a-GCST90001546	Inverse variance weighted	2	-0.0379271	0.0436399182848012	0.384797	-0.123461	0.0476071632799956	0.962783147792134	0.883855831311373	1.04875858350928	1
ebi-a-GCST90001546	ukb-saige-740.1	Osteoarthritis; localized || id:ukb-saige-740.1	Terminally Differentiated CD4+ T cell %CD4+ T cell || id:ebi-a-GCST90001546	Bayesian Weighted Mendelian Randomization	2	-0.0423427	0.0493039975388418	0.390446	-0.138979	0.0542931156752775	0.958541213506291	0.870246690979532	1.05579402658335	1
ebi-a-GCST90001548	ukb-saige-740.1	Osteoarthritis; localized || id:ukb-saige-740.1	Central Memory CD8+ T cell Absolute Count || id:ebi-a-GCST90001548	Wald ratio	1	0.0277324632952692	0.0350734094616639	0.42912	-0.0410114	0.0964763458401305	1.02812058762974	0.959818169481979	1.10128	1
ebi-a-GCST90001551	ukb-saige-740.1	Osteoarthritis; localized || id:ukb-saige-740.1	Naive CD8+ T cell Absolute Count || id:ebi-a-GCST90001551	Wald ratio	1	0.149402390438247	0.119521912350598	0.2113	-0.0848606	0.383665338645418	1.16114012690144	0.918640372733919	1.46765419234542	1
ebi-a-GCST90001552	ukb-saige-740.1	Osteoarthritis; localized || id:ukb-saige-740.1	Naive CD8+ T cell %CD8+ T cell || id:ebi-a-GCST90001552	Wald ratio	1	-0.188324	0.112994350282486	0.0955807	-0.409793	0.0331450094161959	0.828346348194035	0.663787743713345	1.03370042466875	1
ebi-a-GCST90001553	ieu-a-1169	Hip osteoarthritis || id:ieu-a-1169	Naive CD8+ T cell %T cell || id:ebi-a-GCST90001553	Wald ratio	1	0.404562189054726	0.260980099502488	0.121102	-0.106959	0.916083184079602	1.49864623268297	0.898562687646087	2.49948	1
ebi-a-GCST90001553	ieu-a-1170	Knee and hip osteoarthritis || id:ieu-a-1170	Naive CD8+ T cell %T cell || id:ebi-a-GCST90001553	Wald ratio	1	0.325213101160862	0.203548922056385	0.110106	-0.0737428	0.724168988391376	1.38432561594618	0.928910591860295	2.06301599718759	1
ebi-a-GCST90001553	ieu-a-1171	Knee osteoarthritis || id:ieu-a-1171	Naive CD8+ T cell %T cell || id:ebi-a-GCST90001553	Wald ratio	1	0.0825068822553897	0.251616086235489	0.742981	-0.410661	0.575674411276949	1.08601	0.663211956539264	1.77832944801951	1
ebi-a-GCST90001553	ukb-saige-740.1	Osteoarthritis; localized || id:ukb-saige-740.1	Naive CD8+ T cell %T cell || id:ebi-a-GCST90001553	Inverse variance weighted	3	0.00185444262397103	0.00412196001639524	0.652787	-0.0062246	0.0099334842561057	1.00185616316608	0.993794733674711	1.00998298508029	1
ebi-a-GCST90001553	ukb-saige-740.1	Osteoarthritis; localized || id:ukb-saige-740.1	Naive CD8+ T cell %T cell || id:ebi-a-GCST90001553	Bayesian Weighted Mendelian Randomization	3	0.00198551769996731	0.00446820052938863	0.656778	-0.00677216	0.010743190737569	1.00198749014546	0.993250724029647	1.01080110602369	1
ebi-a-GCST90001553	ukb-saige-740.1	Osteoarthritis; localized || id:ukb-saige-740.1	Naive CD8+ T cell %T cell || id:ebi-a-GCST90001553	MR Egger	3	0.000105526795059505	0.00398320818969994	0.983138	-0.00770156	0.00791261484687139	1.00010553236321	0.992328019777382	1.00794400231476	0.998524067790455
ebi-a-GCST90001553	ukb-saige-740.1	Osteoarthritis; localized || id:ukb-saige-740.1	Naive CD8+ T cell %T cell || id:ebi-a-GCST90001553	Weighted median	3	0.00168423836298632	0.00399506303731098	0.673332	-0.00614608	0.00951456191611584	1.00168565748902	0.993872763356745	1.00955996925641	0.974299104969666
ebi-a-GCST90001553	ukb-saige-740.1	Osteoarthritis; localized || id:ukb-saige-740.1	Naive CD8+ T cell %T cell || id:ebi-a-GCST90001553	Weighted mode	3	0.00144619463984935	0.00352294194047429	0.721234	-0.00545877	0.00835116084317897	1.00144724088361	0.994556100456718	1.00838612906085	0.974498079964075
ebi-a-GCST90001554	ieu-a-1169	Hip osteoarthritis || id:ieu-a-1169	Effector Memory CD8+ T cell Absolute Count || id:ebi-a-GCST90001554	Wald ratio	1	0.226411536328342	0.147516361619523	0.124827	-0.0627205	0.515543605102607	1.25409166337347	0.939205914595292	1.67454854755737	1
ebi-a-GCST90001554	ieu-a-1170	Knee and hip osteoarthritis || id:ieu-a-1170	Effector Memory CD8+ T cell Absolute Count || id:ebi-a-GCST90001554	Wald ratio	1	0.284488630061009	0.119217970049917	0.0170193	0.0508214087631725	0.518155851358847	1.32908220163051	1.05213497441698	1.67892859912755	0.697643028917994
ebi-a-GCST90001554	ieu-a-1171	Knee osteoarthritis || id:ieu-a-1171	Effector Memory CD8+ T cell Absolute Count || id:ebi-a-GCST90001554	Wald ratio	1	0.226411536328342	0.161455906821963	0.160822	-0.090042	0.54286511369939	1.25409166337347	0.913892763458889	1.72093046692955	1
ebi-a-GCST90001554	ukb-saige-740.1	Osteoarthritis; localized || id:ukb-saige-740.1	Effector Memory CD8+ T cell Absolute Count || id:ebi-a-GCST90001554	Inverse variance weighted	2	0.0203993318933305	0.0500636976475417	0.683665	-0.0777255	0.118524179282512	1.02060882031397	0.925218349792919	1.12583409563355	1
ebi-a-GCST90001554	ukb-saige-740.1	Osteoarthritis; localized || id:ukb-saige-740.1	Effector Memory CD8+ T cell Absolute Count || id:ebi-a-GCST90001554	Bayesian Weighted Mendelian Randomization	2	0.00627143296218739	0.0308993333424893	0.839164	-0.0542913	0.0668341263134664	1.00629113957258	0.947156197240491	1.06911812490117	1
ebi-a-GCST90001555	ukb-saige-740.1	Osteoarthritis; localized || id:ukb-saige-740.1	Effector Memory CD8+ T cell %CD8+ T cell || id:ebi-a-GCST90001555	Inverse variance weighted	4	0.00848941620223162	0.0272956610101112	0.755788	-0.0450101	0.0619889117820496	1.00852555348505	0.955987846022071	1.06395054734707	1
ebi-a-GCST90001555	ukb-saige-740.1	Osteoarthritis; localized || id:ukb-saige-740.1	Effector Memory CD8+ T cell %CD8+ T cell || id:ebi-a-GCST90001555	Bayesian Weighted Mendelian Randomization	4	0.0089850778234906	0.020915227272978	0.66749	-0.0320088	0.0499789232785274	1.00902556480395	0.968498090607561	1.05124893926143	1
ebi-a-GCST90001555	ukb-saige-740.1	Osteoarthritis; localized || id:ukb-saige-740.1	Effector Memory CD8+ T cell %CD8+ T cell || id:ebi-a-GCST90001555	MR Egger	4	0.0169077921824379	0.043431023803608	0.734594	-0.068217	0.10203259883751	1.01705153789882	0.934057747531276	1.10741957173019	0.998524067790455
ebi-a-GCST90001555	ukb-saige-740.1	Osteoarthritis; localized || id:ukb-saige-740.1	Effector Memory CD8+ T cell %CD8+ T cell || id:ebi-a-GCST90001555	Weighted median	4	0.00786585546170761	0.0192999773057193	0.683598	-0.0299621	0.0456938109809175	1.00789687257482	0.970482314075412	1.04675385734764	0.974299104969666
ebi-a-GCST90001555	ukb-saige-740.1	Osteoarthritis; localized || id:ukb-saige-740.1	Effector Memory CD8+ T cell %CD8+ T cell || id:ebi-a-GCST90001555	Weighted mode	4	0.0090447607252625	0.0199202366232346	0.68063	-0.0299989	0.0480884245068024	1.00908578817475	0.970446598073228	1.04926343182402	0.974498079964075
ebi-a-GCST90001556	ukb-saige-740.1	Osteoarthritis; localized || id:ukb-saige-740.1	Effector Memory CD8+ T cell %T cell || id:ebi-a-GCST90001556	Inverse variance weighted	2	-0.0151806	0.0374452142589535	0.685178	-0.0885732	0.0582120553832122	0.984934079352978	0.91523612717572	1.05993973780784	1
ebi-a-GCST90001556	ukb-saige-740.1	Osteoarthritis; localized || id:ukb-saige-740.1	Effector Memory CD8+ T cell %T cell || id:ebi-a-GCST90001556	Bayesian Weighted Mendelian Randomization	2	-0.0085529	0.0285855582909916	0.764785	-0.0645806	0.0474747939384186	0.991483571685426	0.937460556994103	1.04861976921369	1
ebi-a-GCST90001557	ukb-saige-740.1	Osteoarthritis; localized || id:ukb-saige-740.1	Terminally Differentiated CD8+ T cell Absolute Count || id:ebi-a-GCST90001557	Wald ratio	1	0.0339958158995816	0.0784518828451883	0.664773	-0.11977	0.187761506276151	1.03458027793129	0.887124563232987	1.20654572744963	1
ebi-a-GCST90001558	ukb-saige-740.1	Osteoarthritis; localized || id:ukb-saige-740.1	Terminally Differentiated CD8+ T cell %CD8+ T cell || id:ebi-a-GCST90001558	Inverse variance weighted	3	-0.0127466	0.0224905345053816	0.570881	-0.0568281	0.0313348281187137	0.987334274569182	0.944756490086488	1.03183093206358	1
ebi-a-GCST90001558	ukb-saige-740.1	Osteoarthritis; localized || id:ukb-saige-740.1	Terminally Differentiated CD8+ T cell %CD8+ T cell || id:ebi-a-GCST90001558	Bayesian Weighted Mendelian Randomization	3	-0.0133926	0.0238895227386089	0.575066	-0.0602161	0.0334308572773267	0.986696674657552	0.941561066754179	1.03399594795953	1
ebi-a-GCST90001558	ukb-saige-740.1	Osteoarthritis; localized || id:ukb-saige-740.1	Terminally Differentiated CD8+ T cell %CD8+ T cell || id:ebi-a-GCST90001558	MR Egger	3	-0.0152737	0.0354602919003	0.74108	-0.0847758	0.0542284953940213	0.984842374276751	0.918718193058029	1.05572580308073	0.998524067790455
ebi-a-GCST90001558	ukb-saige-740.1	Osteoarthritis; localized || id:ukb-saige-740.1	Terminally Differentiated CD8+ T cell %CD8+ T cell || id:ebi-a-GCST90001558	Weighted median	3	-0.00924237	0.0241550125999062	0.701996	-0.0565862	0.0381014541651031	0.990800208896548	0.944985027786071	1.03883662183448	0.974299104969666
ebi-a-GCST90001558	ukb-saige-740.1	Osteoarthritis; localized || id:ukb-saige-740.1	Terminally Differentiated CD8+ T cell %CD8+ T cell || id:ebi-a-GCST90001558	Weighted mode	3	-0.0092908	0.0231902069994469	0.727435	-0.0547436	0.036162004582017	0.990752225003776	0.946727851368908	1.03682380309253	0.974498079964075
ebi-a-GCST90001559	ukb-saige-740.1	Osteoarthritis; localized || id:ukb-saige-740.1	Terminally Differentiated CD8+ T cell %T cell || id:ebi-a-GCST90001559	Inverse variance weighted	2	-0.00833126	0.0288113073289977	0.772454	-0.0648014	0.0481389036498042	0.991703350042662	0.937253563699562	1.0493163990797	1
ebi-a-GCST90001559	ukb-saige-740.1	Osteoarthritis; localized || id:ukb-saige-740.1	Terminally Differentiated CD8+ T cell %T cell || id:ebi-a-GCST90001559	Bayesian Weighted Mendelian Randomization	2	-0.00815268	0.0309567059588847	0.792275	-0.0688278	0.0525224589846898	0.991880458309828	0.933487386284299	1.05392623192584	1
ebi-a-GCST90001560	ieu-a-1169	Hip osteoarthritis || id:ieu-a-1169	CD45RA+ CD8+ T cell Absolute Count || id:ebi-a-GCST90001560	Wald ratio	1	-0.387284	0.191331425300515	0.0429542	-0.762294	-0.0122749	0.678897929345494	0.46659479189241	0.987800135102832	0.900659323502345
ebi-a-GCST90001560	ieu-a-1170	Knee and hip osteoarthritis || id:ieu-a-1170	CD45RA+ CD8+ T cell Absolute Count || id:ebi-a-GCST90001560	Wald ratio	1	-0.169197	0.141881511161992	0.233055	-0.447285	0.108890280480824	0.844342145054661	0.639361508691784	1.11504000197669	1
ebi-a-GCST90001560	ieu-a-1171	Knee osteoarthritis || id:ieu-a-1171	CD45RA+ CD8+ T cell Absolute Count || id:ebi-a-GCST90001560	Wald ratio	1	0.115642243846594	0.194986262163709	0.553128	-0.266531	0.497815317687464	1.12259	0.766032386588044	1.64512327017684	1
ebi-a-GCST90001560	ukb-saige-740.1	Osteoarthritis; localized || id:ukb-saige-740.1	CD45RA+ CD8+ T cell Absolute Count || id:ebi-a-GCST90001560	Inverse variance weighted	3	-0.0275462	0.0797117806862159	0.729664	-0.183781	0.128688875002437	0.972829722050256	0.832117763684187	1.13733621538641	1
ebi-a-GCST90001560	ukb-saige-740.1	Osteoarthritis; localized || id:ukb-saige-740.1	CD45RA+ CD8+ T cell Absolute Count || id:ebi-a-GCST90001560	Bayesian Weighted Mendelian Randomization	3	-0.0336492	0.0849517222653508	0.692033	-0.200155	0.132856211573279	0.966910672145928	0.818604236443548	1.14208576780822	1
ebi-a-GCST90001560	ukb-saige-740.1	Osteoarthritis; localized || id:ukb-saige-740.1	CD45RA+ CD8+ T cell Absolute Count || id:ebi-a-GCST90001560	MR Egger	3	-1.10341	1.00564750701528	0.470512	-3.07448	0.867660334261449	0.331738331324041	0.0462137505956084	2.38133280790496	0.998524067790455
ebi-a-GCST90001560	ukb-saige-740.1	Osteoarthritis; localized || id:ukb-saige-740.1	CD45RA+ CD8+ T cell Absolute Count || id:ebi-a-GCST90001560	Weighted median	3	-0.032332	0.0665281817189845	0.626975	-0.162727	0.0980632391750896	0.968185094174624	0.849822960323925	1.10303253777072	0.974299104969666
ebi-a-GCST90001560	ukb-saige-740.1	Osteoarthritis; localized || id:ukb-saige-740.1	CD45RA+ CD8+ T cell Absolute Count || id:ebi-a-GCST90001560	Weighted mode	3	-0.119628	0.12987669633698	0.454243	-0.374186	0.134930729039739	0.887250791138809	0.687849014637635	1.14445750393516	0.974498079964075
ebi-a-GCST90001568	ukb-saige-740.1	Osteoarthritis; localized || id:ukb-saige-740.1	Naive CD4-CD8- T cell %T cell || id:ebi-a-GCST90001568	Wald ratio	1	0.00919842312746386	0.0854139290407359	0.91424	-0.158213	0.176609724047306	1.00924085863493	0.853668035657437	1.19316533850743	1
ebi-a-GCST90001571	ukb-saige-740.1	Osteoarthritis; localized || id:ukb-saige-740.1	Effector Memory CD4-CD8- T cell %T cell || id:ebi-a-GCST90001571	Inverse variance weighted	3	-0.0940779	0.0444814487244751	0.0344307	-0.181262	-0.00689426	0.910211859116124	0.834217154137159	0.993129456001828	0.900659323502345
ebi-a-GCST90001571	ukb-saige-740.1	Osteoarthritis; localized || id:ukb-saige-740.1	Effector Memory CD4-CD8- T cell %T cell || id:ebi-a-GCST90001571	Bayesian Weighted Mendelian Randomization	3	-0.101006	0.0499786500409562	0.0432819	-0.198964	-0.00304765	0.903927783760154	0.819579429556308	0.996956986458146	1
ebi-a-GCST90001571	ukb-saige-740.1	Osteoarthritis; localized || id:ukb-saige-740.1	Effector Memory CD4-CD8- T cell %T cell || id:ebi-a-GCST90001571	MR Egger	3	-0.218186	0.136364998810096	0.355613	-0.485461	0.0490897003734439	0.803976131611395	0.615413367329849	1.05031456012293	0.998524067790455
ebi-a-GCST90001571	ukb-saige-740.1	Osteoarthritis; localized || id:ukb-saige-740.1	Effector Memory CD4-CD8- T cell %T cell || id:ebi-a-GCST90001571	Weighted median	3	-0.0812382	0.0515032004890872	0.114717	-0.182184	0.0197080623511969	0.921974041287753	0.833447568852412	1.01990354831666	0.974299104969666
ebi-a-GCST90001571	ukb-saige-740.1	Osteoarthritis; localized || id:ukb-saige-740.1	Effector Memory CD4-CD8- T cell %T cell || id:ebi-a-GCST90001571	Weighted mode	3	-0.0628023	0.057622018605452	0.38957	-0.175741	0.0501368999802157	0.939129162029354	0.838834867125276	1.05141502522002	0.974498079964075
ebi-a-GCST90001573	ukb-saige-740.1	Osteoarthritis; localized || id:ukb-saige-740.1	Terminally Differentiated CD4-CD8- T cell %CD4-CD8- T cell || id:ebi-a-GCST90001573	Inverse variance weighted	2	-0.0152744	0.0240224784834216	0.524882	-0.0623585	0.0318096547262657	0.984841658916392	0.939546035876129	1.03232098918149	1
ebi-a-GCST90001573	ukb-saige-740.1	Osteoarthritis; localized || id:ukb-saige-740.1	Terminally Differentiated CD4-CD8- T cell %CD4-CD8- T cell || id:ebi-a-GCST90001573	Bayesian Weighted Mendelian Randomization	2	-0.015531	0.0250368418908622	0.535044	-0.0646032	0.033541229688303	0.98458900330056	0.937439374410669	1.03411007888358	1
ebi-a-GCST90001574	ukb-saige-740.1	Osteoarthritis; localized || id:ukb-saige-740.1	Terminally Differentiated CD4-CD8- T cell %T cell || id:ebi-a-GCST90001574	Inverse variance weighted	4	-0.0456696	0.0254753637634237	0.0730215	-0.0956013	0.00426212206426842	0.95535756887119	0.90882628935316	1.00427121782434	1
ebi-a-GCST90001574	ukb-saige-740.1	Osteoarthritis; localized || id:ukb-saige-740.1	Terminally Differentiated CD4-CD8- T cell %T cell || id:ebi-a-GCST90001574	Bayesian Weighted Mendelian Randomization	4	-0.0519426	0.0290574009335929	0.0738426	-0.108895	0.00500986526602704	0.949383321373171	0.896824447846052	1.00502243562419	1
ebi-a-GCST90001574	ukb-saige-740.1	Osteoarthritis; localized || id:ukb-saige-740.1	Terminally Differentiated CD4-CD8- T cell %T cell || id:ebi-a-GCST90001574	MR Egger	4	-0.0177028	0.038511399681406	0.690879	-0.0931852	0.0577795243597271	0.982452955315339	0.911024797147833	1.05948138012232	0.998524067790455
ebi-a-GCST90001574	ukb-saige-740.1	Osteoarthritis; localized || id:ukb-saige-740.1	Terminally Differentiated CD4-CD8- T cell %T cell || id:ebi-a-GCST90001574	Weighted median	4	-0.0273768	0.0282552240160535	0.332589	-0.082757	0.0280034335019838	0.972994542678836	0.920574778628678	1.02839921542611	0.974299104969666
ebi-a-GCST90001574	ukb-saige-740.1	Osteoarthritis; localized || id:ukb-saige-740.1	Terminally Differentiated CD4-CD8- T cell %T cell || id:ebi-a-GCST90001574	Weighted mode	4	-0.0282959	0.032108803542725	0.443073	-0.0912291	0.0346373785787102	0.972100702624494	0.912808533921648	1.03524423898972	0.974498079964075
ebi-a-GCST90001577	ukb-saige-740.1	Osteoarthritis; localized || id:ukb-saige-740.1	Transitional B cell Absolute Count || id:ebi-a-GCST90001577	Wald ratio	1	0.137142857142857	0.08	0.0864763	-0.0196571	0.293942857142857	1.14699199281593	0.980534799041579	1.34170723249167	1
ebi-a-GCST90001580	ukb-saige-740.1	Osteoarthritis; localized || id:ukb-saige-740.1	CD14+ CD16+ monocyte Absolute Count || id:ebi-a-GCST90001580	Inverse variance weighted	3	-0.000491962	0.0313861141612018	0.987494	-0.0620087	0.0610248214614267	0.999508158699079	0.939874666563859	1.06292529721903	1
ebi-a-GCST90001580	ukb-saige-740.1	Osteoarthritis; localized || id:ukb-saige-740.1	CD14+ CD16+ monocyte Absolute Count || id:ebi-a-GCST90001580	Bayesian Weighted Mendelian Randomization	3	-0.000578468	0.0246285015042894	0.981261	-0.0488503	0.0476933951607648	0.999421699492591	0.952323652612718	1.04884902383377	1
ebi-a-GCST90001580	ukb-saige-740.1	Osteoarthritis; localized || id:ukb-saige-740.1	CD14+ CD16+ monocyte Absolute Count || id:ebi-a-GCST90001580	MR Egger	3	-0.0297203	0.0711271720206328	0.748028	-0.16913	0.109688966763335	0.970717014449466	0.844399506406484	1.11593092486731	0.998524067790455
ebi-a-GCST90001580	ukb-saige-740.1	Osteoarthritis; localized || id:ukb-saige-740.1	CD14+ CD16+ monocyte Absolute Count || id:ebi-a-GCST90001580	Weighted median	3	-0.00728311	0.0251673221497344	0.772285	-0.0566111	0.0420448399715038	0.992743346144015	0.944961528541246	1.04294124315792	0.974299104969666
ebi-a-GCST90001580	ukb-saige-740.1	Osteoarthritis; localized || id:ukb-saige-740.1	CD14+ CD16+ monocyte Absolute Count || id:ebi-a-GCST90001580	Weighted mode	3	-0.0103308	0.0247654279277707	0.717084	-0.058871	0.038209439432087	0.989722380114622	0.942828350304758	1.0389488069415	0.974498079964075
ebi-a-GCST90001581	ieu-a-1169	Hip osteoarthritis || id:ieu-a-1169	CD14- CD16- Absolute Count || id:ebi-a-GCST90001581	Inverse variance weighted	2	-0.0405041	0.152561889563463	0.79063	-0.339525	0.258517213127223	0.960305236454358	0.712108213431916	1.29500844080607	1
ebi-a-GCST90001581	ieu-a-1169	Hip osteoarthritis || id:ieu-a-1169	CD14- CD16- Absolute Count || id:ebi-a-GCST90001581	Bayesian Weighted Mendelian Randomization	2	-0.0412382	0.1569635109402	0.792763	-0.348887	0.266410297334141	0.959600541126218	0.705473080141841	1.30527049784039	1
ebi-a-GCST90001581	ieu-a-1170	Knee and hip osteoarthritis || id:ieu-a-1170	CD14- CD16- Absolute Count || id:ebi-a-GCST90001581	Inverse variance weighted	2	-0.0954349	0.223688487914253	0.66964	-0.533864	0.342994525734823	0.908977524550701	0.586334785110325	1.40916104778408	1
ebi-a-GCST90001581	ieu-a-1170	Knee and hip osteoarthritis || id:ieu-a-1170	CD14- CD16- Absolute Count || id:ebi-a-GCST90001581	Bayesian Weighted Mendelian Randomization	2	-0.0687151	0.219313332836465	0.754038	-0.498569	0.361139027582479	0.933592618271324	0.60739908236144	1.43496294644063	1
ebi-a-GCST90001581	ieu-a-1171	Knee osteoarthritis || id:ieu-a-1171	CD14- CD16- Absolute Count || id:ebi-a-GCST90001581	Inverse variance weighted	2	-0.15059	0.49366833952955	0.760333	-1.11818	0.816999627541385	0.860200035006672	0.326874078458464	2.26369770192562	1
ebi-a-GCST90001581	ieu-a-1171	Knee osteoarthritis || id:ieu-a-1171	CD14- CD16- Absolute Count || id:ebi-a-GCST90001581	Bayesian Weighted Mendelian Randomization	2	-0.0766585	0.477192085564489	0.872373	-1.01195	0.858638002894054	0.926206113054228	0.363507637029775	2.35994426655953	1
ebi-a-GCST90001581	ukb-saige-740.1	Osteoarthritis; localized || id:ukb-saige-740.1	CD14- CD16- Absolute Count || id:ebi-a-GCST90001581	Inverse variance weighted	4	0.0155086606024001	0.0507510341417304	0.759922	-0.0839634	0.114980687520192	1.01562954398389	0.919464938866738	1.12185177162304	1
ebi-a-GCST90001581	ukb-saige-740.1	Osteoarthritis; localized || id:ukb-saige-740.1	CD14- CD16- Absolute Count || id:ebi-a-GCST90001581	Bayesian Weighted Mendelian Randomization	4	0.0248254464436769	0.0527738759308359	0.638061	-0.0786113	0.128262243268115	1.02513616374302	0.92439912200636	1.13685109515554	1
ebi-a-GCST90001581	ukb-saige-740.1	Osteoarthritis; localized || id:ukb-saige-740.1	CD14- CD16- Absolute Count || id:ebi-a-GCST90001581	MR Egger	4	0.3915811957582	0.173968302904163	0.153258	0.0506033220660406	0.73255906945036	1.47931803698135	1.05190554279438	2.08039768354575	0.998524067790455
ebi-a-GCST90001581	ukb-saige-740.1	Osteoarthritis; localized || id:ukb-saige-740.1	CD14- CD16- Absolute Count || id:ebi-a-GCST90001581	Weighted median	4	0.0173692371503427	0.0430479694835159	0.686591	-0.0670048	0.101743257338034	1.01752095951087	0.935190728273898	1.10709919564205	0.974299104969666
ebi-a-GCST90001581	ukb-saige-740.1	Osteoarthritis; localized || id:ukb-saige-740.1	CD14- CD16- Absolute Count || id:ebi-a-GCST90001581	Weighted mode	4	0.0211418848195233	0.0548006448716066	0.725379	-0.0862674	0.128551148767872	1.02136695782377	0.917348918471208	1.13717958513833	0.974498079964075
ebi-a-GCST90001582	ieu-a-1169	Hip osteoarthritis || id:ieu-a-1169	CD14+ CD16- monocyte Absolute Count || id:ebi-a-GCST90001582	Wald ratio	1	-0.0551608	0.255272228320527	0.828921	-0.555494	0.44517275521405	0.94633295374311	0.573788521608714	1.56075980193773	1
ebi-a-GCST90001582	ieu-a-1170	Knee and hip osteoarthritis || id:ieu-a-1170	CD14+ CD16- monocyte Absolute Count || id:ebi-a-GCST90001582	Wald ratio	1	-0.398302	0.194983534577387	0.0410773	-0.78047	-0.0161347	0.671458937748096	0.458190545718976	0.983994779670394	0.900659323502345
ebi-a-GCST90001582	ieu-a-1171	Knee osteoarthritis || id:ieu-a-1171	CD14+ CD16- monocyte Absolute Count || id:ebi-a-GCST90001582	Wald ratio	1	-0.827788	0.243406695938529	0.000671782	-1.30487	-0.350711	0.437014831590675	0.271209072871316	0.70418721987536	0.112103637609876
ebi-a-GCST90001583	ukb-saige-740.1	Osteoarthritis; localized || id:ukb-saige-740.1	Monocyte Absolute Count || id:ebi-a-GCST90001583	Wald ratio	1	0.145137880986938	0.0798258345428157	0.0690363	-0.0113208	0.301596516690856	1.15619897713424	0.988743083899169	1.35201560091276	1
ebi-a-GCST90001584	ieu-a-1169	Hip osteoarthritis || id:ieu-a-1169	CD14- CD16+ monocyte %monocyte || id:ebi-a-GCST90001584	Wald ratio	1	-0.113873	0.186301897642323	0.541047	-0.479025	0.251278228867165	0.892370842120199	0.61938686982066	1.28566774445329	1
ebi-a-GCST90001584	ieu-a-1170	Knee and hip osteoarthritis || id:ieu-a-1170	CD14- CD16+ monocyte %monocyte || id:ebi-a-GCST90001584	Wald ratio	1	-0.0572187	0.13145600920069	0.663367	-0.314872	0.200435089131685	0.944387519712853	0.729881952416125	1.22193429284975	1
ebi-a-GCST90001584	ukb-saige-740.1	Osteoarthritis; localized || id:ukb-saige-740.1	CD14- CD16+ monocyte %monocyte || id:ebi-a-GCST90001584	Wald ratio	1	-0.0454284	0.0747556066705003	0.543392	-0.191949	0.101092581943646	0.955588013410968	0.82534863320822	1.10637906774645	1
ebi-a-GCST90001585	ukb-saige-740.1	Osteoarthritis; localized || id:ukb-saige-740.1	CD14+ CD16+ monocyte %monocyte || id:ebi-a-GCST90001585	Inverse variance weighted	3	-0.00177225	0.0289892288132964	0.951252	-0.0585911	0.0550466413434315	0.998229322371997	0.943092287197155	1.05658989429838	1
ebi-a-GCST90001585	ukb-saige-740.1	Osteoarthritis; localized || id:ukb-saige-740.1	CD14+ CD16+ monocyte %monocyte || id:ebi-a-GCST90001585	Bayesian Weighted Mendelian Randomization	3	-0.00184291	0.0227502161281967	0.935437	-0.0464333	0.0427475180265826	0.998158791523118	0.954628204278308	1.04367435262203	1
ebi-a-GCST90001585	ukb-saige-740.1	Osteoarthritis; localized || id:ukb-saige-740.1	CD14+ CD16+ monocyte %monocyte || id:ebi-a-GCST90001585	MR Egger	3	-0.0288472	0.0621527784250289	0.72336	-0.150667	0.0929722075452254	0.971564871160666	0.86013434752684	1.09743123453628	0.998524067790455
ebi-a-GCST90001585	ukb-saige-740.1	Osteoarthritis; localized || id:ukb-saige-740.1	CD14+ CD16+ monocyte %monocyte || id:ebi-a-GCST90001585	Weighted median	3	-0.00731937	0.0232058585619879	0.75245	-0.0528029	0.0381641085420655	0.992707347145845	0.948566997374026	1.03890171153484	0.974299104969666
ebi-a-GCST90001585	ukb-saige-740.1	Osteoarthritis; localized || id:ukb-saige-740.1	CD14+ CD16+ monocyte %monocyte || id:ebi-a-GCST90001585	Weighted mode	3	-0.00982149	0.0226906458689905	0.707335	-0.0542952	0.0346521790171098	0.990226586403759	0.947152510536655	1.03525956117169	0.974498079964075
ebi-a-GCST90001586	ukb-saige-740.1	Osteoarthritis; localized || id:ukb-saige-740.1	CD14+ CD16- monocyte %monocyte || id:ebi-a-GCST90001586	Wald ratio	1	-0.114173	0.149606299212598	0.445369	-0.407402	0.179055118110236	0.89210340489879	0.665376938031314	1.1960866683879	1
ebi-a-GCST90001587	ukb-saige-740.1	Osteoarthritis; localized || id:ukb-saige-740.1	CD16+ monocyte %monocyte || id:ebi-a-GCST90001587	Wald ratio	1	0.113458528951487	0.148669796557121	0.445369	-0.177934	0.404851330203443	1.12014543432348	0.836997435596793	1.49907961562761	1
ebi-a-GCST90001588	ukb-saige-740.1	Osteoarthritis; localized || id:ukb-saige-740.1	T/B cell || id:ebi-a-GCST90001588	Inverse variance weighted	2	-0.0283924	0.0633571072065121	0.654057	-0.152572	0.0957875428330961	0.972006888812001	0.858496807440325	1.1005252246831	1
ebi-a-GCST90001588	ukb-saige-740.1	Osteoarthritis; localized || id:ukb-saige-740.1	T/B cell || id:ebi-a-GCST90001588	Bayesian Weighted Mendelian Randomization	2	-0.0289762	0.065065663587168	0.656076	-0.156505	0.0985525351044141	0.971439617942572	0.855127356508571	1.10357237916169	1
ebi-a-GCST90001589	ukb-saige-740.1	Osteoarthritis; localized || id:ukb-saige-740.1	CD4+/CD8+ T cell || id:ebi-a-GCST90001589	Wald ratio	1	0.0509186351706037	0.125984251968504	0.68609	-0.19601	0.297847769028871	1.05223727469374	0.822003604673781	1.34695672374127	1
ebi-a-GCST90001590	ieu-a-1169	Hip osteoarthritis || id:ieu-a-1169	CD4+ T cell Absolute Count || id:ebi-a-GCST90001590	Wald ratio	1	-0.0541367	0.150563656147987	0.719176	-0.349241	0.240968041349293	0.94730257798562	0.705222804920131	1.27248036790279	1
ebi-a-GCST90001590	ieu-a-1170	Knee and hip osteoarthritis || id:ieu-a-1170	CD4+ T cell Absolute Count || id:ebi-a-GCST90001590	Wald ratio	1	-0.10774	0.121945593035909	0.376962	-0.346753	0.131273427638738	0.897861068567821	0.70697972071949	1.14027952262808	1
ebi-a-GCST90001590	ieu-a-1171	Knee osteoarthritis || id:ieu-a-1171	CD4+ T cell Absolute Count || id:ebi-a-GCST90001590	Wald ratio	1	-0.16082	0.14764907508161	0.276062	-0.450213	0.128571730141458	0.851444928345538	0.637492578122281	1.13720299009706	1
ebi-a-GCST90001590	ukb-saige-740.1	Osteoarthritis; localized || id:ukb-saige-740.1	CD4+ T cell Absolute Count || id:ebi-a-GCST90001590	Wald ratio	1	0.0223068552774755	0.0598476605005441	0.709351	-0.0949946	0.139608269858542	1.02255751350281	0.90937788210375	1.14982329018396	1
ebi-a-GCST90001592	ieu-a-1169	Hip osteoarthritis || id:ieu-a-1169	CD8+ T cell Absolute Count || id:ebi-a-GCST90001592	Wald ratio	1	0.216332803391627	0.140949655537891	0.124827	-0.0599285	0.492594128245893	1.24151549082045	0.941831851941528	1.63655615465726	1
ebi-a-GCST90001592	ieu-a-1170	Knee and hip osteoarthritis || id:ieu-a-1170	CD8+ T cell Absolute Count || id:ebi-a-GCST90001592	Wald ratio	1	0.271824589295178	0.113910969793323	0.0170193	0.048559088500265	0.49509009009009	1.31235677969233	1.0497573985781	1.64064603834872	0.697643028917994
ebi-a-GCST90001592	ieu-a-1171	Knee osteoarthritis || id:ieu-a-1171	CD8+ T cell Absolute Count || id:ebi-a-GCST90001592	Wald ratio	1	0.216332803391627	0.154268680445151	0.160822	-0.0860338	0.518699417064123	1.24151549082045	0.917563207625931	1.6798414552118	1
ebi-a-GCST90001592	ukb-saige-740.1	Osteoarthritis; localized || id:ukb-saige-740.1	CD8+ T cell Absolute Count || id:ebi-a-GCST90001592	Wald ratio	1	0.132485426603074	0.0582935877053524	0.0230426	0.018229994700583	0.246740858505564	1.14166237806896	1.01839717540993	1.2798474082309	0.750290190662488
ebi-a-GCST90001593	ukb-saige-740.1	Osteoarthritis; localized || id:ukb-saige-740.1	CD8+ T cell %T cell || id:ebi-a-GCST90001593	Wald ratio	1	-0.0501551	0.124095139607032	0.68609	-0.293382	0.193071354705274	0.951081882259017	0.745737518511302	1.21296934150115	1
ebi-a-GCST90001594	ukb-saige-740.1	Osteoarthritis; localized || id:ukb-saige-740.1	CD4+CD8+ T cell Absolute Count || id:ebi-a-GCST90001594	Inverse variance weighted	2	-0.00167469	0.036141597938262	0.963042	-0.0725122	0.0691628404630365	0.998326710017369	0.930054378113005	1.07161069652317	1
ebi-a-GCST90001594	ukb-saige-740.1	Osteoarthritis; localized || id:ukb-saige-740.1	CD4+CD8+ T cell Absolute Count || id:ebi-a-GCST90001594	Bayesian Weighted Mendelian Randomization	2	-0.00216701	0.0369076342920292	0.95318	-0.074506	0.0701719571457843	0.997835340195959	0.928201933346165	1.07269262255744	1
ebi-a-GCST90001596	ieu-a-1170	Knee and hip osteoarthritis || id:ieu-a-1170	CD8dim T cell Absolute Count || id:ebi-a-GCST90001596	Wald ratio	1	-0.0750583	0.154036594473488	0.626063	-0.37697	0.226853472740851	0.927689444592716	0.685936667055162	1.25464601462912	1
ebi-a-GCST90001596	ieu-a-1171	Knee osteoarthritis || id:ieu-a-1171	CD8dim T cell Absolute Count || id:ebi-a-GCST90001596	Wald ratio	1	-0.150879	0.212981329350261	0.478688	-0.568322	0.266564391336819	0.85995173432306	0.566474949242885	1.30547164769357	1
ebi-a-GCST90001596	ukb-saige-740.1	Osteoarthritis; localized || id:ukb-saige-740.1	CD8dim T cell Absolute Count || id:ebi-a-GCST90001596	Inverse variance weighted	3	-0.0168299	0.0885717662855402	0.849298	-0.190431	0.156770780260097	0.983310949633971	0.826603168632753	1.16972745854503	1
ebi-a-GCST90001596	ukb-saige-740.1	Osteoarthritis; localized || id:ukb-saige-740.1	CD8dim T cell Absolute Count || id:ebi-a-GCST90001596	Bayesian Weighted Mendelian Randomization	3	-0.0708999	0.0712939158025387	0.319993	-0.210636	0.0688361995462764	0.931555159021163	0.810068918473723	1.07126	1
ebi-a-GCST90001596	ukb-saige-740.1	Osteoarthritis; localized || id:ukb-saige-740.1	CD8dim T cell Absolute Count || id:ebi-a-GCST90001596	MR Egger	3	-0.216368	0.0907424403343392	0.252808	-0.394223	-0.0385126	0.805439039059781	0.674203730378151	0.962219602786354	0.998524067790455
ebi-a-GCST90001596	ukb-saige-740.1	Osteoarthritis; localized || id:ukb-saige-740.1	CD8dim T cell Absolute Count || id:ebi-a-GCST90001596	Weighted median	3	-0.0867395	0.062593748749008	0.165822	-0.209423	0.0359442437742826	0.916915917662001	0.811051884204501	1.03659804808488	0.974299104969666
ebi-a-GCST90001596	ukb-saige-740.1	Osteoarthritis; localized || id:ukb-saige-740.1	CD8dim T cell Absolute Count || id:ebi-a-GCST90001596	Weighted mode	3	-0.0966467	0.0609029201091273	0.253441	-0.216016	0.022723046323854	0.907876723117308	0.80572208751686	1.02298318135777	0.974498079964075
ebi-a-GCST90001597	ukb-saige-740.1	Osteoarthritis; localized || id:ukb-saige-740.1	CD8dim T cell %T cell || id:ebi-a-GCST90001597	Inverse variance weighted	2	-0.0847694	0.0482621786110637	0.0790142	-0.179363	0.00982451454907579	0.918724158614628	0.835802259473037	1.00987293352655	1
ebi-a-GCST90001597	ukb-saige-740.1	Osteoarthritis; localized || id:ukb-saige-740.1	CD8dim T cell %T cell || id:ebi-a-GCST90001597	Bayesian Weighted Mendelian Randomization	2	-0.0855297	0.0498280055680996	0.0860709	-0.183193	0.0121332150504653	0.918025899439091	0.83260780769713	1.01220712110776	1
ebi-a-GCST90001598	ukb-saige-740.1	Osteoarthritis; localized || id:ukb-saige-740.1	CD4-CD8- T cell Absolute Count || id:ebi-a-GCST90001598	Inverse variance weighted	2	0.0594048080642845	0.107921437785228	0.582014	-0.152121	0.270930826123332	1.06120473803812	0.858884169085928	1.31118436754176	1
ebi-a-GCST90001598	ukb-saige-740.1	Osteoarthritis; localized || id:ukb-saige-740.1	CD4-CD8- T cell Absolute Count || id:ebi-a-GCST90001598	Bayesian Weighted Mendelian Randomization	2	0.0476709706173294	0.107434752446462	0.657245	-0.162901	0.258243085412394	1.04882550413699	0.84967517960155	1.29465349175442	1
ebi-a-GCST90001599	ukb-saige-740.1	Osteoarthritis; localized || id:ukb-saige-740.1	CD4-CD8- T cell %T cell || id:ebi-a-GCST90001599	Inverse variance weighted	3	-0.0582032	0.0410430566328928	0.156161	-0.138648	0.0222411951714821	0.943458221183102	0.870534762322208	1.02249037447229	1
ebi-a-GCST90001599	ukb-saige-740.1	Osteoarthritis; localized || id:ukb-saige-740.1	CD4-CD8- T cell %T cell || id:ebi-a-GCST90001599	Bayesian Weighted Mendelian Randomization	3	-0.0586101	0.0423836646727712	0.166712	-0.141682	0.0244619200294172	0.943074437340921	0.867897164440019	1.02476356739769	1
ebi-a-GCST90001599	ukb-saige-740.1	Osteoarthritis; localized || id:ukb-saige-740.1	CD4-CD8- T cell %T cell || id:ebi-a-GCST90001599	MR Egger	3	-0.232687	0.179896452746689	0.418984	-0.585284	0.119910420534608	0.792401852085689	0.556947847647785	1.12739585553783	0.998524067790455
ebi-a-GCST90001599	ukb-saige-740.1	Osteoarthritis; localized || id:ukb-saige-740.1	CD4-CD8- T cell %T cell || id:ebi-a-GCST90001599	Weighted median	3	-0.0681697	0.0453392708457649	0.132698	-0.157035	0.0206952365601919	0.934101910989178	0.854674396695386	1.02091086791338	0.974299104969666
ebi-a-GCST90001599	ukb-saige-740.1	Osteoarthritis; localized || id:ukb-saige-740.1	CD4-CD8- T cell %T cell || id:ebi-a-GCST90001599	Weighted mode	3	-0.0231179	0.0506055465691389	0.692615	-0.122305	0.0760690125017417	0.977147311602446	0.884878678290114	1.07903703863327	0.974498079964075
ebi-a-GCST90001601	ukb-saige-740.1	Osteoarthritis; localized || id:ukb-saige-740.1	Lymphocyte Absolute Count || id:ebi-a-GCST90001601	Wald ratio	1	0.0213869086195723	0.0712896953985742	0.764177	-0.118341	0.161114711600778	1.02161724769926	0.888393152772433	1.17481972653604	1
ebi-a-GCST90001602	ukb-saige-740.1	Osteoarthritis; localized || id:ukb-saige-740.1	Lymphocyte %leukocyte || id:ebi-a-GCST90001602	Wald ratio	1	-0.0366178	0.0932090545938748	0.694425	-0.219308	0.14607190412783	0.964044481427803	0.803074662520464	1.15727939822497	1
ebi-a-GCST90001603	ieu-a-1169	Hip osteoarthritis || id:ieu-a-1169	T cell Absolute Count || id:ebi-a-GCST90001603	Wald ratio	1	-0.0677815	0.188512261580381	0.719176	-0.437266	0.301702493188011	0.934464594873899	0.645799902129584	1.35215889038277	1
ebi-a-GCST90001603	ieu-a-1170	Knee and hip osteoarthritis || id:ieu-a-1170	T cell Absolute Count || id:ebi-a-GCST90001603	Wald ratio	1	-0.134895	0.152681198910082	0.376962	-0.43415	0.164360054495913	0.873807573342138	0.647814917070963	1.17863861283459	1
ebi-a-GCST90001603	ieu-a-1171	Knee osteoarthritis || id:ieu-a-1171	T cell Absolute Count || id:ebi-a-GCST90001603	Wald ratio	1	-0.201354	0.184863079019074	0.276062	-0.563686	0.160977411444142	0.817622759111675	0.569107543506025	1.17465843467652	1
ebi-a-GCST90001603	ukb-saige-740.1	Osteoarthritis; localized || id:ukb-saige-740.1	T cell Absolute Count || id:ebi-a-GCST90001603	Wald ratio	1	0.0279291553133515	0.0749318801089918	0.709351	-0.118937	0.174795640326975	1.02832283063209	0.887863441686423	1.19100279879828	1
ebi-a-GCST90001604	ieu-a-1169	Hip osteoarthritis || id:ieu-a-1169	T cell %lymphocyte || id:ebi-a-GCST90001604	Wald ratio	1	0.263860980810235	0.160606396588486	0.100403	-0.0509276	0.578649518123668	1.30194718807617	0.950347514535876	1.78362804617559	1
ebi-a-GCST90001604	ieu-a-1170	Knee and hip osteoarthritis || id:ieu-a-1170	T cell %lymphocyte || id:ebi-a-GCST90001604	Wald ratio	1	0.0428584221748401	0.120388059701493	0.721839	-0.193102	0.278819019189765	1.04379010685586	0.824397737128772	1.32156814375144	1
ebi-a-GCST90001604	ieu-a-1171	Knee osteoarthritis || id:ieu-a-1171	T cell %lymphocyte || id:ebi-a-GCST90001604	Wald ratio	1	-0.12605	0.157936886993603	0.424809	-0.435607	0.183505978678038	0.881570485190851	0.646872143530194	1.20142214830643	1
ebi-a-GCST90001604	ukb-saige-740.1	Osteoarthritis; localized || id:ukb-saige-740.1	T cell %lymphocyte || id:ebi-a-GCST90001604	Inverse variance weighted	2	-0.000513129	0.0645381940468386	0.993656	-0.127008	0.125981731536593	0.999487002832855	0.880726636332088	1.13426144688002	1
ebi-a-GCST90001604	ukb-saige-740.1	Osteoarthritis; localized || id:ukb-saige-740.1	T cell %lymphocyte || id:ebi-a-GCST90001604	Bayesian Weighted Mendelian Randomization	2	-0.0115477	0.0664689676509372	0.862078	-0.141827	0.118731518539397	0.988518760242421	0.867771511431585	1.12606754943954	1
ebi-a-GCST90001606	ukb-saige-740.1	Osteoarthritis; localized || id:ukb-saige-740.1	CD4+ T cell %leukocyte || id:ebi-a-GCST90001606	Wald ratio	1	0.120967741935484	0.100806451612903	0.230139	-0.0766129	0.318548387096774	1.12858850569931	0.926248331960516	1.37513015813011	1
ebi-a-GCST90001607	ieu-a-1169	Hip osteoarthritis || id:ieu-a-1169	CD8+ T cell %leukocyte || id:ebi-a-GCST90001607	Wald ratio	1	0.226662965019434	0.147680177679067	0.124827	-0.0627902	0.516116113270405	1.2544070176418	0.939140500443587	1.67550751476031	1
ebi-a-GCST90001607	ieu-a-1170	Knee and hip osteoarthritis || id:ieu-a-1170	CD8+ T cell %leukocyte || id:ebi-a-GCST90001607	Wald ratio	1	0.284804553026097	0.119350360910605	0.0170193	0.0508778456413104	0.518731260410883	1.32950215555355	1.05219435530594	1.67989494783745	0.697643028917994
ebi-a-GCST90001607	ieu-a-1171	Knee osteoarthritis || id:ieu-a-1171	CD8+ T cell %leukocyte || id:ebi-a-GCST90001607	Wald ratio	1	0.226662965019434	0.161635202665186	0.160822	-0.090142	0.543467962243198	1.2544070176418	0.913801386828375	1.72196824013414	1
ebi-a-GCST90001607	ukb-saige-740.1	Osteoarthritis; localized || id:ukb-saige-740.1	CD8+ T cell %leukocyte || id:ebi-a-GCST90001607	Wald ratio	1	0.138811771238201	0.0610771793448084	0.0230426	0.0191004997223765	0.258523042754026	1.1489078221526	1.01928408123728	1.29501599024399	0.750290190662488
ebi-a-GCST90001608	ukb-saige-740.1	Osteoarthritis; localized || id:ukb-saige-740.1	CD4+CD8+ T cell %leukocyte || id:ebi-a-GCST90001608	Wald ratio	1	-0.0150737	0.0411099691675231	0.713868	-0.0956492	0.0655018842069202	0.985039383499213	0.908782765757899	1.06769474906944	1
ebi-a-GCST90001609	ukb-saige-740.1	Osteoarthritis; localized || id:ukb-saige-740.1	CD4+ CD8dim T cell Absolute Count || id:ebi-a-GCST90001609	Inverse variance weighted	3	0.0101424434375657	0.0313187741317831	0.746055	-0.0512424	0.0715272407358606	1.01019405234959	0.950048394733096	1.07414741086867	1
ebi-a-GCST90001609	ukb-saige-740.1	Osteoarthritis; localized || id:ukb-saige-740.1	CD4+ CD8dim T cell Absolute Count || id:ebi-a-GCST90001609	Bayesian Weighted Mendelian Randomization	3	0.0106774162229232	0.0342203776493158	0.755026	-0.0563945	0.0777493564155822	1.01073	0.945166171613475	1.08085171616814	1
ebi-a-GCST90001609	ukb-saige-740.1	Osteoarthritis; localized || id:ukb-saige-740.1	CD4+ CD8dim T cell Absolute Count || id:ebi-a-GCST90001609	MR Egger	3	0.102416994011505	0.154924668797799	0.628136	-0.201235	0.406069344855192	1.1078453402956	0.817719952926436	1.50090662900224	0.998524067790455
ebi-a-GCST90001609	ukb-saige-740.1	Osteoarthritis; localized || id:ukb-saige-740.1	CD4+ CD8dim T cell Absolute Count || id:ebi-a-GCST90001609	Weighted median	3	0.0101872976086519	0.0333051166443871	0.759698	-0.0550907	0.0754653262316506	1.01023936478267	0.946399276291616	1.07838583536914	0.974299104969666
ebi-a-GCST90001609	ukb-saige-740.1	Osteoarthritis; localized || id:ukb-saige-740.1	CD4+ CD8dim T cell Absolute Count || id:ebi-a-GCST90001609	Weighted mode	3	0.0166563349511472	0.0386711542198077	0.70865	-0.0591391	0.0924517972219702	1.01679582508679	0.942575622014353	1.09686026857395	0.974498079964075
ebi-a-GCST90001610	ukb-saige-740.1	Osteoarthritis; localized || id:ukb-saige-740.1	CD4+ CD8dim T cell %lymphocyte || id:ebi-a-GCST90001610	Inverse variance weighted	2	0.0283536269053198	0.0317139165514757	0.371299	-0.0338056	0.0905129033462122	1.02875941711379	0.966759376514237	1.0947356333034	1
ebi-a-GCST90001610	ukb-saige-740.1	Osteoarthritis; localized || id:ukb-saige-740.1	CD4+ CD8dim T cell %lymphocyte || id:ebi-a-GCST90001610	Bayesian Weighted Mendelian Randomization	2	0.0285891310518906	0.0321536084185871	0.373927	-0.0344319	0.0916102035523213	1.02900172275322	0.966154092496968	1.09593754624852	1
ebi-a-GCST90001611	ukb-saige-740.1	Osteoarthritis; localized || id:ukb-saige-740.1	CD4+ CD8dim T cell %leukocyte || id:ebi-a-GCST90001611	Inverse variance weighted	3	0.00967677818551539	0.0291298894561431	0.739743	-0.0474178	0.0667713615195558	1.00972374959191	0.953688858225212	1.0690510240282	1
ebi-a-GCST90001611	ukb-saige-740.1	Osteoarthritis; localized || id:ukb-saige-740.1	CD4+ CD8dim T cell %leukocyte || id:ebi-a-GCST90001611	Bayesian Weighted Mendelian Randomization	3	0.0101747907324608	0.0315400070803757	0.746999	-0.0516436	0.0719932046099973	1.01022672992302	0.949667245970407	1.07464804138644	1
ebi-a-GCST90001611	ukb-saige-740.1	Osteoarthritis; localized || id:ukb-saige-740.1	CD4+ CD8dim T cell %leukocyte || id:ebi-a-GCST90001611	MR Egger	3	0.119892832516826	0.147929636107853	0.566402	-0.170049	0.409834919288219	1.12737602705385	0.843623263538079	1.50656905909086	0.998524067790455
ebi-a-GCST90001611	ukb-saige-740.1	Osteoarthritis; localized || id:ukb-saige-740.1	CD4+ CD8dim T cell %leukocyte || id:ebi-a-GCST90001611	Weighted median	3	0.0104055260627192	0.0318001886934085	0.743505	-0.0519228	0.0727338959017999	1.01045985181488	0.949402116299036	1.07544431869388	0.974299104969666
ebi-a-GCST90001611	ukb-saige-740.1	Osteoarthritis; localized || id:ukb-saige-740.1	CD4+ CD8dim T cell %leukocyte || id:ebi-a-GCST90001611	Weighted mode	3	0.0170513099613759	0.0360085712991491	0.682487	-0.0535255	0.0876281097077081	1.01719751335139	0.947881779393147	1.09158209774924	0.974498079964075
ebi-a-GCST90001612	ukb-saige-740.1	Osteoarthritis; localized || id:ukb-saige-740.1	CD8dim T cell %leukocyte || id:ebi-a-GCST90001612	Inverse variance weighted	2	-0.0891808	0.0507992298826496	0.0791644	-0.188747	0.0103856550765545	0.914680151981233	0.827995693196894	1.01043977318063	1
ebi-a-GCST90001612	ukb-saige-740.1	Osteoarthritis; localized || id:ukb-saige-740.1	CD8dim T cell %leukocyte || id:ebi-a-GCST90001612	Bayesian Weighted Mendelian Randomization	2	-0.0901505	0.0527191403537985	0.0872632	-0.19348	0.0131790097379867	0.913793644083927	0.824086300904988	1.01326623564933	1
ebi-a-GCST90001614	ukb-saige-740.1	Osteoarthritis; localized || id:ukb-saige-740.1	CD8+ and CD8dim T cell %leukocyte || id:ebi-a-GCST90001614	Inverse variance weighted	2	-0.0389265	0.06988891326571	0.577543	-0.175909	0.0980557314472109	0.961821363339703	0.838694461610333	1.10302425653367	1
ebi-a-GCST90001614	ukb-saige-740.1	Osteoarthritis; localized || id:ukb-saige-740.1	CD8+ and CD8dim T cell %leukocyte || id:ebi-a-GCST90001614	Bayesian Weighted Mendelian Randomization	2	-0.0394846	0.0721146595565445	0.584018	-0.180829	0.101860144979638	0.961284769436473	0.834577791875468	1.10722860941933	1
ebi-a-GCST90001621	ieu-a-1169	Hip osteoarthritis || id:ieu-a-1169	Natural Killer T Absolute Count || id:ebi-a-GCST90001621	Inverse variance weighted	2	0.147211869250703	0.147159327321443	0.317138	-0.14122	0.435644150800731	1.15859940861632	0.86829790706628	1.54595856873765	1
ebi-a-GCST90001621	ieu-a-1169	Hip osteoarthritis || id:ieu-a-1169	Natural Killer T Absolute Count || id:ebi-a-GCST90001621	Bayesian Weighted Mendelian Randomization	2	0.150424007069281	0.154848762140784	0.331337	-0.15308	0.453927580865217	1.16232697311373	0.858061445954664	1.57448397057932	1
ebi-a-GCST90001621	ieu-a-1170	Knee and hip osteoarthritis || id:ieu-a-1170	Natural Killer T Absolute Count || id:ebi-a-GCST90001621	Inverse variance weighted	2	0.0319718243792005	0.107129420391959	0.765367	-0.178002	0.24194548834744	1.03248841389326	0.836940883860076	1.27372475808224	1
ebi-a-GCST90001621	ieu-a-1170	Knee and hip osteoarthritis || id:ieu-a-1170	Natural Killer T Absolute Count || id:ebi-a-GCST90001621	Bayesian Weighted Mendelian Randomization	2	0.033058470015425	0.1117765793296	0.767417	-0.186024	0.252140565501441	1.03361097272403	0.830253979609245	1.28677690101328	1
ebi-a-GCST90001621	ieu-a-1171	Knee osteoarthritis || id:ieu-a-1171	Natural Killer T Absolute Count || id:ebi-a-GCST90001621	Inverse variance weighted	2	-0.0713462	0.140401965338114	0.611343	-0.346534	0.203841607221785	0.931139434080871	0.707134707772232	1.2261039320668	1
ebi-a-GCST90001621	ieu-a-1171	Knee osteoarthritis || id:ieu-a-1171	Natural Killer T Absolute Count || id:ebi-a-GCST90001621	Bayesian Weighted Mendelian Randomization	2	-0.0728312	0.145559978734291	0.616827	-0.358129	0.212466372844901	0.929757773395783	0.698983079480209	1.23672452533861	1
ebi-a-GCST90001622	ieu-a-1169	Hip osteoarthritis || id:ieu-a-1169	Natural Killer T %T cell || id:ebi-a-GCST90001622	Wald ratio	1	0.275824324324324	0.179710810810811	0.124827	-0.0764089	0.628057513513514	1.31761637054783	0.92643734143393	1.87396688614528	1
ebi-a-GCST90001622	ieu-a-1170	Knee and hip osteoarthritis || id:ieu-a-1170	Natural Killer T %T cell || id:ebi-a-GCST90001622	Wald ratio	1	0.13650472972973	0.140785135135135	0.332248	-0.139434	0.412443594594595	1.14626029926436	0.869850313891033	1.51050433929512	1
ebi-a-GCST90001622	ukb-saige-740.1	Osteoarthritis; localized || id:ukb-saige-740.1	Natural Killer T %T cell || id:ebi-a-GCST90001622	Inverse variance weighted	6	-0.0123694	0.0402535197520192	0.758624	-0.0912663	0.0665274694069351	0.987706757630489	0.912774581076782	1.06879032270824	1
ebi-a-GCST90001622	ukb-saige-740.1	Osteoarthritis; localized || id:ukb-saige-740.1	Natural Killer T %T cell || id:ebi-a-GCST90001622	Bayesian Weighted Mendelian Randomization	6	-0.0328063	0.0388434407798175	0.398347	-0.108939	0.0433268439815717	0.967725990011484	0.896784721661416	1.04427915543513	1
ebi-a-GCST90001622	ukb-saige-740.1	Osteoarthritis; localized || id:ukb-saige-740.1	Natural Killer T %T cell || id:ebi-a-GCST90001622	MR Egger	6	-0.125022	0.0672223433900179	0.136427	-0.256778	0.00673335795826618	0.882477103912635	0.773539744099546	1.00675607797835	0.998524067790455
ebi-a-GCST90001622	ukb-saige-740.1	Osteoarthritis; localized || id:ukb-saige-740.1	Natural Killer T %T cell || id:ebi-a-GCST90001622	Weighted median	6	-0.0416473	0.0407876463228424	0.307219	-0.121591	0.0382965117148503	0.959208057496965	0.885510413442547	1.03903927452435	0.974299104969666
ebi-a-GCST90001622	ukb-saige-740.1	Osteoarthritis; localized || id:ukb-saige-740.1	Natural Killer T %T cell || id:ebi-a-GCST90001622	Weighted mode	6	-0.0611608	0.0557351862031119	0.322504	-0.170402	0.0480801300513196	0.940671934725837	0.843325900279897	1.04925472879129	0.974498079964075
ebi-a-GCST90001623	ieu-a-1169	Hip osteoarthritis || id:ieu-a-1169	Natural Killer T %lymphocyte || id:ebi-a-GCST90001623	Inverse variance weighted	2	0.290563288535665	0.135216891075068	0.0316448	0.0255381820285325	0.555588395042798	1.33718049436823	1.0258670752086	1.7429662358111	0.900659323502345
ebi-a-GCST90001623	ieu-a-1169	Hip osteoarthritis || id:ieu-a-1169	Natural Killer T %lymphocyte || id:ebi-a-GCST90001623	Bayesian Weighted Mendelian Randomization	2	0.295190118350377	0.144323897175714	0.0408223	0.0123152798859771	0.578064956814777	1.34338173592912	1.0123914252079	1.78258571091446	1
ebi-a-GCST90001623	ieu-a-1170	Knee and hip osteoarthritis || id:ieu-a-1170	Natural Killer T %lymphocyte || id:ebi-a-GCST90001623	Inverse variance weighted	2	0.0969121658344257	0.101815053242252	0.341176	-0.102645	0.296469670189241	1.10176359688473	0.902446979912351	1.34510176269665	1
ebi-a-GCST90001623	ieu-a-1170	Knee and hip osteoarthritis || id:ieu-a-1170	Natural Killer T %lymphocyte || id:ebi-a-GCST90001623	Bayesian Weighted Mendelian Randomization	2	0.0991508450750459	0.106002714227983	0.349602	-0.108614	0.306916164961893	1.10423285508442	0.897076196310143	1.35922701244693	1
ebi-a-GCST90001623	ieu-a-1171	Knee osteoarthritis || id:ieu-a-1171	Natural Killer T %lymphocyte || id:ebi-a-GCST90001623	Inverse variance weighted	2	-0.0774585	0.136158801787114	0.569435	-0.34433	0.1894127489876	0.925465428087391	0.70869519442651	1.20853967307915	1
ebi-a-GCST90001623	ieu-a-1171	Knee osteoarthritis || id:ieu-a-1171	Natural Killer T %lymphocyte || id:ebi-a-GCST90001623	Bayesian Weighted Mendelian Randomization	2	-0.0783615	0.141350103661719	0.57932	-0.355408	0.198684710754299	0.924630119340505	0.700887636146292	1.21979731628936	1
ebi-a-GCST90001623	ukb-saige-740.1	Osteoarthritis; localized || id:ukb-saige-740.1	Natural Killer T %lymphocyte || id:ebi-a-GCST90001623	Inverse variance weighted	7	-0.00666541	0.0381037940193672	0.861137	-0.0813488	0.0680180304242723	0.993356758691339	0.921872047536228	1.0703846077934	1
ebi-a-GCST90001623	ukb-saige-740.1	Osteoarthritis; localized || id:ukb-saige-740.1	Natural Killer T %lymphocyte || id:ebi-a-GCST90001623	Bayesian Weighted Mendelian Randomization	7	-0.0293172	0.0379184583427053	0.439426	-0.103637	0.0450030281668291	0.971108428404739	0.901552205395209	1.04603102746038	1
ebi-a-GCST90001623	ukb-saige-740.1	Osteoarthritis; localized || id:ukb-saige-740.1	Natural Killer T %lymphocyte || id:ebi-a-GCST90001623	MR Egger	7	-0.133	0.0681100006141342	0.108292	-0.266495	0.000495783538459999	0.8754652517365	0.76605951313718	1.00049590645943	0.998524067790455
ebi-a-GCST90001623	ukb-saige-740.1	Osteoarthritis; localized || id:ukb-saige-740.1	Natural Killer T %lymphocyte || id:ebi-a-GCST90001623	Weighted median	7	-0.0352975	0.0426721448609679	0.408135	-0.118935	0.0483398786157303	0.965318166939141	0.887865572970554	1.0495273066001	0.974299104969666
ebi-a-GCST90001623	ukb-saige-740.1	Osteoarthritis; localized || id:ukb-saige-740.1	Natural Killer T %lymphocyte || id:ebi-a-GCST90001623	Weighted mode	7	-0.0732939	0.0604517012783881	0.270914	-0.191779	0.0451914092345888	0.929327637000991	0.825489067022663	1.04622809846388	0.974498079964075
ebi-a-GCST90001624	ieu-a-1169	Hip osteoarthritis || id:ieu-a-1169	HLA DR+ CD4+ T cell Absolute Count || id:ebi-a-GCST90001624	Wald ratio	1	0.0665142289874255	0.188737260092654	0.724526	-0.303411	0.436439258769027	1.06877617156969	0.738295741588575	1.54718826151879	1
ebi-a-GCST90001624	ieu-a-1170	Knee and hip osteoarthritis || id:ieu-a-1170	HLA DR+ CD4+ T cell Absolute Count || id:ebi-a-GCST90001624	Wald ratio	1	-0.131056	0.132483785572469	0.322553	-0.390724	0.128611965585705	0.877168428650733	0.676566542129898	1.13724874688508	1
ebi-a-GCST90001624	ieu-a-1171	Knee osteoarthritis || id:ieu-a-1171	HLA DR+ CD4+ T cell Absolute Count || id:ebi-a-GCST90001624	Wald ratio	1	-0.259568	0.177880211780278	0.144502	-0.608213	0.0890773792190603	0.771384878654531	0.544322677415972	1.09316524132641	1
ebi-a-GCST90001624	ukb-saige-740.1	Osteoarthritis; localized || id:ukb-saige-740.1	HLA DR+ CD4+ T cell Absolute Count || id:ebi-a-GCST90001624	Inverse variance weighted	2	-0.0250015	0.0493660598560735	0.61254	-0.121759	0.0717560010936807	0.975308472253278	0.885361756098675	1.07439316132264	1
ebi-a-GCST90001624	ukb-saige-740.1	Osteoarthritis; localized || id:ukb-saige-740.1	HLA DR+ CD4+ T cell Absolute Count || id:ebi-a-GCST90001624	Bayesian Weighted Mendelian Randomization	2	-0.0225552	0.0488488996638245	0.644272	-0.118299	0.0731886242693895	0.977697248168284	0.888430316766657	1.07593346493926	1
ebi-a-GCST90001625	ukb-saige-740.1	Osteoarthritis; localized || id:ukb-saige-740.1	HLA DR+ CD4+ T cell %T cell || id:ebi-a-GCST90001625	Wald ratio	1	0.007694881231181	0.0434928069588491	0.859569	-0.077551	0.0929407828705252	1.00772456291326	0.925379809936588	1.09739674865859	1
ebi-a-GCST90001626	ukb-saige-740.1	Osteoarthritis; localized || id:ukb-saige-740.1	HLA DR+ CD4+ T cell %lymphocyte || id:ebi-a-GCST90001626	Inverse variance weighted	2	-0.0221656	0.0532960837415853	0.677486	-0.126626	0.0822947176569914	0.978078245546323	0.881063189732092	1.08577575996775	1
ebi-a-GCST90001626	ukb-saige-740.1	Osteoarthritis; localized || id:ukb-saige-740.1	HLA DR+ CD4+ T cell %lymphocyte || id:ebi-a-GCST90001626	Bayesian Weighted Mendelian Randomization	2	-0.0190824	0.0515626062779724	0.711322	-0.120145	0.0819803458542724	0.981098553233959	0.886791779831843	1.08543447633253	1
ebi-a-GCST90001630	ukb-saige-740.1	Osteoarthritis; localized || id:ukb-saige-740.1	CD8+ Natural Killer T Absolute Count || id:ebi-a-GCST90001630	Wald ratio	1	-0.0605449	0.0807265388496468	0.453255	-0.218769	0.0976791120080727	0.941251501982813	0.803507370958757	1.10260891437469	1
ebi-a-GCST90001631	ukb-saige-740.1	Osteoarthritis; localized || id:ukb-saige-740.1	CD8+ Natural Killer T %T cell || id:ebi-a-GCST90001631	Wald ratio	1	-0.0714286	0.0788177339901478	0.364804	-0.225911	0.0830541871921182	0.931062779704023	0.797788838426519	1.08660068679317	1
ebi-a-GCST90001632	ukb-saige-740.1	Osteoarthritis; localized || id:ukb-saige-740.1	CD8+ Natural Killer T %lymphocyte || id:ebi-a-GCST90001632	Wald ratio	1	-0.0605908	0.0807876798788185	0.453255	-0.218935	0.0977530926533703	0.941208341158251	0.803374247092638	1.10269048911113	1
ebi-a-GCST90001633	ukb-saige-740.1	Osteoarthritis; localized || id:ukb-saige-740.1	CD8dim Natural Killer T Absolute Count || id:ebi-a-GCST90001633	Inverse variance weighted	5	-0.0230888	0.0307909915093214	0.453342	-0.0834391	0.0372615752400962	0.977175737871823	0.919947099186579	1.03796449114264	1
ebi-a-GCST90001633	ukb-saige-740.1	Osteoarthritis; localized || id:ukb-saige-740.1	CD8dim Natural Killer T Absolute Count || id:ebi-a-GCST90001633	Bayesian Weighted Mendelian Randomization	5	-0.0308449	0.0340089294258318	0.364426	-0.0975024	0.0358126423826652	0.969625989870438	0.907100199920003	1.03646163931519	1
ebi-a-GCST90001633	ukb-saige-740.1	Osteoarthritis; localized || id:ukb-saige-740.1	CD8dim Natural Killer T Absolute Count || id:ebi-a-GCST90001633	MR Egger	5	-0.0902772	0.0556194404540449	0.203021	-0.199291	0.0187368896976232	0.913677866237602	0.819311179385555	1.01891352670003	0.998524067790455
ebi-a-GCST90001633	ukb-saige-740.1	Osteoarthritis; localized || id:ukb-saige-740.1	CD8dim Natural Killer T Absolute Count || id:ebi-a-GCST90001633	Weighted median	5	-0.0362194	0.0401116029113928	0.366545	-0.114838	0.0423993885618633	0.964428719806992	0.8915104723588	1.04331108206457	0.974299104969666
ebi-a-GCST90001633	ukb-saige-740.1	Osteoarthritis; localized || id:ukb-saige-740.1	CD8dim Natural Killer T Absolute Count || id:ebi-a-GCST90001633	Weighted mode	5	-0.0459224	0.0531033347728433	0.435942	-0.150005	0.0581601398247579	0.955116079827834	0.860703731006528	1.05988471187279	0.974498079964075
ebi-a-GCST90001634	ukb-saige-740.1	Osteoarthritis; localized || id:ukb-saige-740.1	CD8dim Natural Killer T %T cell || id:ebi-a-GCST90001634	Inverse variance weighted	5	-0.00817322	0.0432832320728439	0.850225	-0.0930084	0.0766619165870808	0.991860091661227	0.911185889002451	1.07967699379898	1
ebi-a-GCST90001634	ukb-saige-740.1	Osteoarthritis; localized || id:ukb-saige-740.1	CD8dim Natural Killer T %T cell || id:ebi-a-GCST90001634	Bayesian Weighted Mendelian Randomization	5	-0.0297033	0.0369710582904942	0.421731	-0.102167	0.0427599374216739	0.970733471707252	0.902879109475669	1.04368731450665	1
ebi-a-GCST90001634	ukb-saige-740.1	Osteoarthritis; localized || id:ukb-saige-740.1	CD8dim Natural Killer T %T cell || id:ebi-a-GCST90001634	MR Egger	5	-0.109174	0.0485506434586182	0.110075	-0.204333	-0.0140146	0.896574548736326	0.815190789768834	0.986083174062473	0.998524067790455
ebi-a-GCST90001634	ukb-saige-740.1	Osteoarthritis; localized || id:ukb-saige-740.1	CD8dim Natural Killer T %T cell || id:ebi-a-GCST90001634	Weighted median	5	-0.0346087	0.0363369290658822	0.340874	-0.105829	0.036611654956683	0.965983306463672	0.899578366603217	1.03729011613512	0.974299104969666
ebi-a-GCST90001634	ukb-saige-740.1	Osteoarthritis; localized || id:ukb-saige-740.1	CD8dim Natural Killer T %T cell || id:ebi-a-GCST90001634	Weighted mode	5	-0.0409747	0.0382760759121294	0.344688	-0.115996	0.0340463937824636	0.95985339952908	0.890478942114024	1.03463260613473	0.974498079964075
ebi-a-GCST90001636	ukb-saige-740.1	Osteoarthritis; localized || id:ukb-saige-740.1	CD4-CD8- Natural Killer T Absolute Count || id:ebi-a-GCST90001636	Wald ratio	1	-0.0390221	0.0611189468735308	0.523173	-0.158815	0.0807710390220968	0.961729457719983	0.853153979345495	1.08412264636676	1
ebi-a-GCST90001637	ukb-saige-740.1	Osteoarthritis; localized || id:ukb-saige-740.1	CD4-CD8- Natural Killer T %T cell || id:ebi-a-GCST90001637	Inverse variance weighted	5	-0.0402152	0.0279960766054874	0.150872	-0.0950875	0.0146571177886506	0.960582706851673	0.909293365539905	1.01476506006905	1
ebi-a-GCST90001637	ukb-saige-740.1	Osteoarthritis; localized || id:ukb-saige-740.1	CD4-CD8- Natural Killer T %T cell || id:ebi-a-GCST90001637	Bayesian Weighted Mendelian Randomization	5	-0.0405995	0.0285107346967209	0.154444	-0.0964806	0.0152815214645385	0.960213600699683	0.908027550803455	1.01539888096217	1
ebi-a-GCST90001637	ukb-saige-740.1	Osteoarthritis; localized || id:ukb-saige-740.1	CD4-CD8- Natural Killer T %T cell || id:ebi-a-GCST90001637	MR Egger	5	-0.052161	0.0668709005001644	0.492261	-0.183228	0.0789060049626111	0.949176075148676	0.83257836868626	1.08210260501512	0.998524067790455
ebi-a-GCST90001637	ukb-saige-740.1	Osteoarthritis; localized || id:ukb-saige-740.1	CD4-CD8- Natural Killer T %T cell || id:ebi-a-GCST90001637	Weighted median	5	-0.0364586	0.0325306173946451	0.262395	-0.100219	0.0273013793290053	0.964197981204619	0.904639605232295	1.02767747684487	0.974299104969666
ebi-a-GCST90001637	ukb-saige-740.1	Osteoarthritis; localized || id:ukb-saige-740.1	CD4-CD8- Natural Killer T %T cell || id:ebi-a-GCST90001637	Weighted mode	5	-0.0455065	0.0408303105232528	0.327499	-0.125534	0.0345209121623951	0.955513395094202	0.882025858755032	1.03512367482416	0.974498079964075
ebi-a-GCST90001638	ieu-a-1170	Knee and hip osteoarthritis || id:ieu-a-1170	CD4-CD8- Natural Killer T %lymphocyte || id:ebi-a-GCST90001638	Wald ratio	1	-0.072934	0.149677068214804	0.626063	-0.366301	0.220433091436865	0.929662220786882	0.693294077210908	1.24661651262813	1
ebi-a-GCST90001638	ieu-a-1171	Knee osteoarthritis || id:ieu-a-1171	CD4-CD8- Natural Killer T %lymphocyte || id:ebi-a-GCST90001638	Wald ratio	1	-0.146609	0.206953555878084	0.478688	-0.552238	0.259020116110305	0.863631717959839	0.575660142426794	1.29565986820273	1
ebi-a-GCST90001638	ukb-saige-740.1	Osteoarthritis; localized || id:ukb-saige-740.1	CD4-CD8- Natural Killer T %lymphocyte || id:ebi-a-GCST90001638	Inverse variance weighted	6	-0.020299	0.0334669715258227	0.544157	-0.0858943	0.0452962412983273	0.979905615282162	0.917691237910389	1.04633778246369	1
ebi-a-GCST90001638	ukb-saige-740.1	Osteoarthritis; localized || id:ukb-saige-740.1	CD4-CD8- Natural Killer T %lymphocyte || id:ebi-a-GCST90001638	Bayesian Weighted Mendelian Randomization	6	-0.0311198	0.0335275885908747	0.353312	-0.0968339	0.0345942725595164	0.969359435813521	0.907706786655773	1.03519961469347	1
ebi-a-GCST90001638	ukb-saige-740.1	Osteoarthritis; localized || id:ukb-saige-740.1	CD4-CD8- Natural Killer T %lymphocyte || id:ebi-a-GCST90001638	MR Egger	6	-0.111789	0.0541799671066849	0.108048	-0.217982	-0.0055964	0.894232803360234	0.804140023170739	0.99441923491441	0.998524067790455
ebi-a-GCST90001638	ukb-saige-740.1	Osteoarthritis; localized || id:ukb-saige-740.1	CD4-CD8- Natural Killer T %lymphocyte || id:ebi-a-GCST90001638	Weighted median	6	-0.0363832	0.0341450332224062	0.286628	-0.103307	0.0305411096747299	0.964270757105345	0.901849683729221	1.0310122737568	0.974299104969666
ebi-a-GCST90001638	ukb-saige-740.1	Osteoarthritis; localized || id:ukb-saige-740.1	CD4-CD8- Natural Killer T %lymphocyte || id:ebi-a-GCST90001638	Weighted mode	6	-0.0460265	0.0402050323416969	0.304119	-0.124828	0.0327753858424892	0.955016675356816	0.882648404178965	1.03331841522783	0.974498079964075
ebi-a-GCST90001639	ukb-saige-740.1	Osteoarthritis; localized || id:ukb-saige-740.1	CD3- lymphocyte Absolute Count || id:ebi-a-GCST90001639	Wald ratio	1	0.0133037694013304	0.0376940133037694	0.724133	-0.0605765	0.0871840354767184	1.01339265828983	0.941221765929798	1.09109746188373	1
ebi-a-GCST90001641	ieu-a-1169	Hip osteoarthritis || id:ieu-a-1169	CD3- lymphocyte %leukocyte || id:ebi-a-GCST90001641	Wald ratio	1	-0.233789	0.232095259799453	0.313792	-0.688696	0.22111773928897	0.79152883466689	0.502230712042837	1.24747029818377	1
ebi-a-GCST90001641	ieu-a-1170	Knee and hip osteoarthritis || id:ieu-a-1170	CD3- lymphocyte %leukocyte || id:ebi-a-GCST90001641	Wald ratio	1	-0.0458081	0.164700546946217	0.780913	-0.368621	0.277004958979034	0.955225239877498	0.691687382348805	1.31917291276956	1
ebi-a-GCST90001641	ieu-a-1171	Knee osteoarthritis || id:ieu-a-1171	CD3- lymphocyte %leukocyte || id:ebi-a-GCST90001641	Wald ratio	1	0.0453524612579763	0.230999544211486	0.844351	-0.407407	0.498111567912489	1.0463966091852	0.665373564183966	1.64561071051441	1
ebi-a-GCST90001641	ukb-saige-740.1	Osteoarthritis; localized || id:ukb-saige-740.1	CD3- lymphocyte %leukocyte || id:ebi-a-GCST90001641	Wald ratio	1	0.0428441203281677	0.0911577028258888	0.638355	-0.135825	0.22151321786691	1.04377517883654	0.872995413210651	1.24796374353042	1
ebi-a-GCST90001642	ukb-saige-740.1	Osteoarthritis; localized || id:ukb-saige-740.1	B cell Absolute Count || id:ebi-a-GCST90001642	Wald ratio	1	-0.06311	0.0845803513337671	0.455574	-0.228887	0.10266753415745	0.938840238345277	0.79541805828066	1.10812293480168	1
ebi-a-GCST90001643	ukb-saige-740.1	Osteoarthritis; localized || id:ukb-saige-740.1	B cell %CD3- lymphocyte || id:ebi-a-GCST90001643	Inverse variance weighted	3	-0.00979719	0.0164925603271148	0.552487	-0.0421226	0.022528226230609	0.990250644127706	0.958752220514541	1.02278390309133	1
ebi-a-GCST90001643	ukb-saige-740.1	Osteoarthritis; localized || id:ukb-saige-740.1	B cell %CD3- lymphocyte || id:ebi-a-GCST90001643	Bayesian Weighted Mendelian Randomization	3	-0.0103315	0.0182858339540669	0.572072	-0.0461718	0.0255087004483766	0.989721652871584	0.954877930008877	1.02583683147201	1
ebi-a-GCST90001643	ukb-saige-740.1	Osteoarthritis; localized || id:ukb-saige-740.1	B cell %CD3- lymphocyte || id:ebi-a-GCST90001643	MR Egger	3	-0.0144789	0.0237238729920102	0.651154	-0.0609777	0.0320198680649934	0.985625392540499	0.940844207136452	1.03253801963381	0.998524067790455
ebi-a-GCST90001643	ukb-saige-740.1	Osteoarthritis; localized || id:ukb-saige-740.1	B cell %CD3- lymphocyte || id:ebi-a-GCST90001643	Weighted median	3	-0.0103505	0.0178305821872599	0.561582	-0.0452985	0.0245974199003276	0.98970286112073	0.955712195226753	1.02490243213665	0.974299104969666
ebi-a-GCST90001643	ukb-saige-740.1	Osteoarthritis; localized || id:ukb-saige-740.1	B cell %CD3- lymphocyte || id:ebi-a-GCST90001643	Weighted mode	3	-0.0124076	0.0182261389754099	0.566266	-0.0481308	0.0233156212067918	0.987669045851538	0.953009083802109	1.0235895551399	0.974498079964075
ebi-a-GCST90001644	ukb-saige-740.1	Osteoarthritis; localized || id:ukb-saige-740.1	B cell %lymphocyte || id:ebi-a-GCST90001644	Inverse variance weighted	2	0.0568714317722337	0.0612207158682885	0.352911	-0.0631212	0.176864034874079	1.05851970964345	0.938829707552732	1.1934688119578	1
ebi-a-GCST90001644	ukb-saige-740.1	Osteoarthritis; localized || id:ukb-saige-740.1	B cell %lymphocyte || id:ebi-a-GCST90001644	Bayesian Weighted Mendelian Randomization	2	0.0575859948463528	0.0630559169943887	0.36111	-0.0660036	0.181175592155355	1.05927635904585	0.93612749192122	1.19862563007375	1
ebi-a-GCST90001645	ieu-a-1169	Hip osteoarthritis || id:ieu-a-1169	Natural Killer Absolute Count || id:ebi-a-GCST90001645	Wald ratio	1	-0.253676	0.186262116716123	0.17322	-0.61875	0.111397685459941	0.775943117789207	0.538617389809759	1.11783936693372	1
ebi-a-GCST90001645	ieu-a-1170	Knee and hip osteoarthritis || id:ieu-a-1170	Natural Killer Absolute Count || id:ebi-a-GCST90001645	Wald ratio	1	-0.0497047	0.13961918892186	0.721839	-0.323358	0.223948862512364	0.951510318570536	0.723714458982004	1.25100704443535	1
ebi-a-GCST90001645	ieu-a-1171	Knee osteoarthritis || id:ieu-a-1171	Natural Killer Absolute Count || id:ebi-a-GCST90001645	Wald ratio	1	0.146185954500495	0.171748763600396	0.39468	-0.190442	0.48281353115727	1.15741139389855	0.826594011096578	1.62062768026717	1
ebi-a-GCST90001645	ukb-saige-740.1	Osteoarthritis; localized || id:ukb-saige-740.1	Natural Killer Absolute Count || id:ebi-a-GCST90001645	Inverse variance weighted	3	-0.00670701	0.046701820772384	0.885806	-0.0982426	0.0848285598699715	0.993315432939472	0.906428997750299	1.08853043290164	1
ebi-a-GCST90001645	ukb-saige-740.1	Osteoarthritis; localized || id:ukb-saige-740.1	Natural Killer Absolute Count || id:ebi-a-GCST90001645	Bayesian Weighted Mendelian Randomization	3	-0.000242902	0.0588458613933662	0.996707	-0.115581	0.115094986704438	0.999757127871652	0.890848597709309	1.12198000569377	1
ebi-a-GCST90001645	ukb-saige-740.1	Osteoarthritis; localized || id:ukb-saige-740.1	Natural Killer Absolute Count || id:ebi-a-GCST90001645	MR Egger	3	-0.0517308	0.446857746671293	0.926628	-0.927572	0.824110391961744	0.949584468633399	0.395512860597441	2.27985168853346	0.998524067790455
ebi-a-GCST90001645	ukb-saige-740.1	Osteoarthritis; localized || id:ukb-saige-740.1	Natural Killer Absolute Count || id:ebi-a-GCST90001645	Weighted median	3	-0.041829	0.0497588114971668	0.400552	-0.139356	0.0556982348049698	0.959033727059143	0.869918015993641	1.05727858571408	0.974299104969666
ebi-a-GCST90001645	ukb-saige-740.1	Osteoarthritis; localized || id:ukb-saige-740.1	Natural Killer Absolute Count || id:ebi-a-GCST90001645	Weighted mode	3	-0.052589	0.0577421858548532	0.458562	-0.165764	0.0605857314904585	0.948769921575173	0.847246468190166	1.06245867983213	0.974498079964075
ebi-a-GCST90001646	ieu-a-1169	Hip osteoarthritis || id:ieu-a-1169	Natural Killer %CD3- lymphocyte || id:ebi-a-GCST90001646	Wald ratio	1	-0.319807	0.211741492864984	0.13095	-0.734821	0.0952059714599341	0.726288939853143	0.479591451329915	1.09988537679362	1
ebi-a-GCST90001646	ieu-a-1170	Knee and hip osteoarthritis || id:ieu-a-1170	Natural Killer %CD3- lymphocyte || id:ebi-a-GCST90001646	Wald ratio	1	-0.0546121	0.151885839736553	0.719176	-0.352308	0.243084116355653	0.946852332800046	0.703063281115145	1.27517588275537	1
ebi-a-GCST90001646	ieu-a-1171	Knee osteoarthritis || id:ieu-a-1171	Natural Killer %CD3- lymphocyte || id:ebi-a-GCST90001646	Wald ratio	1	0.167174533479693	0.202431394072448	0.408899	-0.229591	0.56394006586169	1.18196053899274	0.794858634083519	1.75758387193817	1
ebi-a-GCST90001646	ukb-saige-740.1	Osteoarthritis; localized || id:ukb-saige-740.1	Natural Killer %CD3- lymphocyte || id:ebi-a-GCST90001646	Inverse variance weighted	5	0.00880216932948717	0.0163474587029905	0.590271	-0.0232388	0.0408431883873485	1.00884102233518	0.977029092768276	1.04168874384551	1
ebi-a-GCST90001646	ukb-saige-740.1	Osteoarthritis; localized || id:ukb-saige-740.1	Natural Killer %CD3- lymphocyte || id:ebi-a-GCST90001646	Bayesian Weighted Mendelian Randomization	5	0.0101796118415483	0.0197327742136924	0.605943	-0.0284966	0.0488558493003853	1.01023160034803	0.971905573721968	1.05006897165268	1
ebi-a-GCST90001646	ukb-saige-740.1	Osteoarthritis; localized || id:ukb-saige-740.1	Natural Killer %CD3- lymphocyte || id:ebi-a-GCST90001646	MR Egger	5	0.0162086105619316	0.0198248165081231	0.473483	-0.022648	0.0550652509178529	1.01634068269382	0.977606511591236	1.05660955716961	0.998524067790455
ebi-a-GCST90001646	ukb-saige-740.1	Osteoarthritis; localized || id:ukb-saige-740.1	Natural Killer %CD3- lymphocyte || id:ebi-a-GCST90001646	Weighted median	5	0.0099340781932871	0.0174997765997124	0.57026	-0.0243655	0.0442336403287233	1.00998358494691	0.975928958205496	1.04522653343322	0.974299104969666
ebi-a-GCST90001646	ukb-saige-740.1	Osteoarthritis; localized || id:ukb-saige-740.1	Natural Killer %CD3- lymphocyte || id:ebi-a-GCST90001646	Weighted mode	5	0.0111557307763208	0.0173728541138552	0.555737	-0.0228951	0.045206524839477	1.01121818797673	0.977365039867079	1.04624391295397	0.974498079964075
ebi-a-GCST90001647	ieu-a-1169	Hip osteoarthritis || id:ieu-a-1169	Natural Killer %lymphocyte || id:ebi-a-GCST90001647	Wald ratio	1	-0.248496	0.151253815261044	0.100403	-0.544953	0.0479618955823293	0.779973306492731	0.57986900161224	1.04913067804927	1
ebi-a-GCST90001647	ieu-a-1170	Knee and hip osteoarthritis || id:ieu-a-1170	Natural Killer %lymphocyte || id:ebi-a-GCST90001647	Wald ratio	1	-0.0403627	0.113377510040161	0.721839	-0.262583	0.181857269076305	0.960441071455121	0.769062860010267	1.19944298405666	1
ebi-a-GCST90001647	ieu-a-1171	Knee osteoarthritis || id:ieu-a-1171	Natural Killer %lymphocyte || id:ebi-a-GCST90001647	Wald ratio	1	0.118710040160643	0.148739759036145	0.424809	-0.17282	0.410239967871486	1.12604336359395	0.84128912784533	1.50717941635767	1
ebi-a-GCST90001649	ieu-a-1169	Hip osteoarthritis || id:ieu-a-1169	HLA DR+ Natural Killer %Natural Killer || id:ebi-a-GCST90001649	Inverse variance weighted	2	-0.172302	0.186481795518987	0.355507	-0.537806	0.193202480652303	0.841725069734222	0.584028113485784	1.21312840368313	1
ebi-a-GCST90001649	ieu-a-1169	Hip osteoarthritis || id:ieu-a-1169	HLA DR+ Natural Killer %Natural Killer || id:ebi-a-GCST90001649	Bayesian Weighted Mendelian Randomization	2	-0.174738	0.19560128438578	0.371675	-0.558117	0.2086400488324	0.839676593880922	0.572285671851778	1.23200145834522	1
ebi-a-GCST90001649	ieu-a-1170	Knee and hip osteoarthritis || id:ieu-a-1170	HLA DR+ Natural Killer %Natural Killer || id:ebi-a-GCST90001649	Inverse variance weighted	2	-0.1952	0.152553739784161	0.200704	-0.494205	0.103805234723591	0.822670029217911	0.610055449436565	1.10938436432043	1
ebi-a-GCST90001649	ieu-a-1170	Knee and hip osteoarthritis || id:ieu-a-1170	HLA DR+ Natural Killer %Natural Killer || id:ebi-a-GCST90001649	Bayesian Weighted Mendelian Randomization	2	-0.205852	0.161775226725434	0.203212	-0.522931	0.111227928305853	0.813953926383497	0.592780582882753	1.11764962180982	1
ebi-a-GCST90001649	ieu-a-1171	Knee osteoarthritis || id:ieu-a-1171	HLA DR+ Natural Killer %Natural Killer || id:ebi-a-GCST90001649	Inverse variance weighted	2	-0.140166	0.148621710043753	0.345625	-0.431465	0.151132085019542	0.869213528276404	0.649556784707575	1.16315028266366	1
ebi-a-GCST90001649	ieu-a-1171	Knee osteoarthritis || id:ieu-a-1171	HLA DR+ Natural Killer %Natural Killer || id:ebi-a-GCST90001649	Bayesian Weighted Mendelian Randomization	2	-0.143165	0.156183172756074	0.359326	-0.449284	0.162953751074505	0.866610834429988	0.638084674284548	1.1769822542651	1
ebi-a-GCST90001649	ukb-saige-740.1	Osteoarthritis; localized || id:ukb-saige-740.1	HLA DR+ Natural Killer %Natural Killer || id:ebi-a-GCST90001649	Inverse variance weighted	5	-0.0152837	0.0198910072612314	0.442267	-0.05427	0.0237026997759125	0.984832528142218	0.947176288247607	1.02398584141229	1
ebi-a-GCST90001649	ukb-saige-740.1	Osteoarthritis; localized || id:ukb-saige-740.1	HLA DR+ Natural Killer %Natural Killer || id:ebi-a-GCST90001649	Bayesian Weighted Mendelian Randomization	5	-0.0153374	0.0200184397866968	0.44358	-0.0545735	0.0238987840206051	0.984779660299131	0.946888910018954	1.0241866485895	1
ebi-a-GCST90001649	ukb-saige-740.1	Osteoarthritis; localized || id:ukb-saige-740.1	HLA DR+ Natural Killer %Natural Killer || id:ebi-a-GCST90001649	MR Egger	5	-0.0142913	0.0334856004845423	0.698309	-0.079923	0.0513405044686348	0.985810363010598	0.923187383448091	1.05268127494263	0.998524067790455
ebi-a-GCST90001649	ukb-saige-740.1	Osteoarthritis; localized || id:ukb-saige-740.1	HLA DR+ Natural Killer %Natural Killer || id:ebi-a-GCST90001649	Weighted median	5	-0.014976	0.0214801100700662	0.485674	-0.0570771	0.027124968059369	0.985135535604073	0.944521278526266	1.0274961989466	0.974299104969666
ebi-a-GCST90001649	ukb-saige-740.1	Osteoarthritis; localized || id:ukb-saige-740.1	HLA DR+ Natural Killer %Natural Killer || id:ebi-a-GCST90001649	Weighted mode	5	-0.0153273	0.0232201426474112	0.545271	-0.0608388	0.0301841611996066	0.984789547115066	0.940974914609192	1.03064432117181	0.974498079964075
ebi-a-GCST90001650	ieu-a-1170	Knee and hip osteoarthritis || id:ieu-a-1170	HLA DR+ Natural Killer %CD3- lymphocyte || id:ebi-a-GCST90001650	Wald ratio	1	-0.0623081	0.127870427774334	0.626063	-0.312934	0.188317916924985	0.939593333265367	0.73129805968438	1.20721724914428	1
ebi-a-GCST90001650	ukb-saige-740.1	Osteoarthritis; localized || id:ukb-saige-740.1	HLA DR+ Natural Killer %CD3- lymphocyte || id:ebi-a-GCST90001650	Inverse variance weighted	2	-0.0127635	0.0225238638804973	0.570942	-0.0569102	0.0313832982783872	0.987317632779947	0.944678852252307	1.0318809462857	1
ebi-a-GCST90001650	ukb-saige-740.1	Osteoarthritis; localized || id:ukb-saige-740.1	HLA DR+ Natural Killer %CD3- lymphocyte || id:ebi-a-GCST90001650	Bayesian Weighted Mendelian Randomization	2	-0.0127637	0.0225796289922156	0.571887	-0.0570198	0.0314923892059903	0.987317426735304	0.944575407731511	1.03199352127565	1
ebi-a-GCST90001652	ukb-saige-740.1	Osteoarthritis; localized || id:ukb-saige-740.1	Granulocyte %leukocyte || id:ebi-a-GCST90001652	Wald ratio	1	0.0363756613756614	0.0925925925925926	0.694425	-0.145106	0.217857142857143	1.03704535120866	0.864930761203191	1.24340942501275	1
ebi-a-GCST90001653	ieu-a-1169	Hip osteoarthritis || id:ieu-a-1169	CD28- CD4-CD8- T cell %CD4-CD8- T cell || id:ebi-a-GCST90001653	Wald ratio	1	0.210650102669405	0.209124024640657	0.313792	-0.199233	0.620533190965093	1.23448033811004	0.819358972229557	1.85991946976973	1
ebi-a-GCST90001653	ieu-a-1170	Knee and hip osteoarthritis || id:ieu-a-1170	CD28- CD4-CD8- T cell %CD4-CD8- T cell || id:ebi-a-GCST90001653	Wald ratio	1	0.0412743326488706	0.148399589322382	0.780913	-0.249589	0.332137527720739	1.04213795880097	0.779121043169293	1.39394454134628	1
ebi-a-GCST90001653	ieu-a-1171	Knee osteoarthritis || id:ieu-a-1171	CD28- CD4-CD8- T cell %CD4-CD8- T cell || id:ebi-a-GCST90001653	Wald ratio	1	-0.0408638	0.208136755646817	0.844351	-0.448812	0.367084262833676	0.959959888472732	0.638386219355668	1.44351954903833	1
ebi-a-GCST90001653	ukb-saige-740.1	Osteoarthritis; localized || id:ukb-saige-740.1	CD28- CD4-CD8- T cell %CD4-CD8- T cell || id:ebi-a-GCST90001653	Wald ratio	1	-0.0386037	0.0821355236139631	0.638355	-0.199589	0.122381930184805	0.962131930239325	0.819067056524919	1.13018567138268	1
ebi-a-GCST90001654	ukb-saige-740.1	Osteoarthritis; localized || id:ukb-saige-740.1	CD28- CD4-CD8- T cell Absolute Count || id:ebi-a-GCST90001654	Inverse variance weighted	2	0.0740801207886811	0.0876263217093583	0.397882	-0.0976675	0.245827711339023	1.07689308356302	0.9069504420625	1.27867925262663	1
ebi-a-GCST90001654	ukb-saige-740.1	Osteoarthritis; localized || id:ukb-saige-740.1	CD28- CD4-CD8- T cell Absolute Count || id:ebi-a-GCST90001654	Bayesian Weighted Mendelian Randomization	2	0.0653422938069599	0.0915552622317	0.475417	-0.114106	0.244790607781092	1.06752436883328	0.892163363559201	1.27735381724995	1
ebi-a-GCST90001655	ukb-saige-740.1	Osteoarthritis; localized || id:ukb-saige-740.1	CD28+ CD4-CD8- T cell %T cell || id:ebi-a-GCST90001655	Wald ratio	1	-0.0500301	0.0783604581072936	0.523173	-0.203617	0.103556359252562	0.951200756173702	0.815775049604085	1.10910830011844	1
ebi-a-GCST90001656	ieu-a-1169	Hip osteoarthritis || id:ieu-a-1169	CD28+ CD4-CD8- T cell %CD4-CD8- T cell || id:ebi-a-GCST90001656	Wald ratio	1	-0.21065	0.209124024640657	0.313792	-0.620533	0.199232985626283	0.810057454241013	0.537657686934051	1.22046628387909	1
ebi-a-GCST90001656	ieu-a-1170	Knee and hip osteoarthritis || id:ieu-a-1170	CD28+ CD4-CD8- T cell %CD4-CD8- T cell || id:ebi-a-GCST90001656	Wald ratio	1	-0.0412743	0.148399589322382	0.780913	-0.332138	0.249588862422998	0.959565853594418	0.717388655243193	1.28349761409629	1
ebi-a-GCST90001656	ieu-a-1171	Knee osteoarthritis || id:ieu-a-1171	CD28+ CD4-CD8- T cell %CD4-CD8- T cell || id:ebi-a-GCST90001656	Wald ratio	1	0.0408637782340862	0.208136755646817	0.844351	-0.367084	0.448811819301848	1.0417101922779	0.692751269399986	1.56644985383506	1
ebi-a-GCST90001656	ukb-saige-740.1	Osteoarthritis; localized || id:ukb-saige-740.1	CD28+ CD4-CD8- T cell %CD4-CD8- T cell || id:ebi-a-GCST90001656	Wald ratio	1	0.0386036960985626	0.0821355236139631	0.638355	-0.122382	0.19958932238193	1.03935850019161	0.884810368173038	1.22090125836916	1
ebi-a-GCST90001658	ieu-a-1169	Hip osteoarthritis || id:ieu-a-1169	CD39+ CD4+ T cell %T cell || id:ebi-a-GCST90001658	Inverse variance weighted	2	0.0615195248058004	0.141227602479395	0.663123	-0.215287	0.338325625665415	1.06345126000543	0.806310337829945	1.40259715068375	1
ebi-a-GCST90001658	ieu-a-1169	Hip osteoarthritis || id:ieu-a-1169	CD39+ CD4+ T cell %T cell || id:ebi-a-GCST90001658	Bayesian Weighted Mendelian Randomization	2	0.0616595081728511	0.143617243523463	0.667681	-0.21983	0.343149305478839	1.06360013591333	0.802655005680993	1.40937917425068	1
ebi-a-GCST90001658	ieu-a-1170	Knee and hip osteoarthritis || id:ieu-a-1170	CD39+ CD4+ T cell %T cell || id:ebi-a-GCST90001658	Inverse variance weighted	2	0.076230207234465	0.0981103615905457	0.437168	-0.116066	0.268526515951935	1.07921098773978	0.890416363510015	1.30803566038144	1
ebi-a-GCST90001658	ieu-a-1170	Knee and hip osteoarthritis || id:ieu-a-1170	CD39+ CD4+ T cell %T cell || id:ebi-a-GCST90001658	Bayesian Weighted Mendelian Randomization	2	0.0764433944963004	0.0992507363722857	0.441178	-0.118088	0.27097483778598	1.07944108630137	0.888617807444251	1.31124207621573	1
ebi-a-GCST90001658	ieu-a-1171	Knee osteoarthritis || id:ieu-a-1171	CD39+ CD4+ T cell %T cell || id:ebi-a-GCST90001658	Inverse variance weighted	2	0.177132091854789	0.226166228388436	0.433513	-0.266154	0.620417899496122	1.19378877248601	0.766321322762152	1.85970504928256	1
ebi-a-GCST90001658	ieu-a-1171	Knee osteoarthritis || id:ieu-a-1171	CD39+ CD4+ T cell %T cell || id:ebi-a-GCST90001658	Bayesian Weighted Mendelian Randomization	2	0.00707547013229393	0.225148226763198	0.97493	-0.434215	0.448365994588162	1.00710056041136	0.647772934134878	1.56575164742787	1
ebi-a-GCST90001658	ukb-saige-740.1	Osteoarthritis; localized || id:ukb-saige-740.1	CD39+ CD4+ T cell %T cell || id:ebi-a-GCST90001658	Inverse variance weighted	6	-0.0064737	0.0132999074863593	0.626437	-0.0325415	0.0195941149188271	0.99354720552123	0.967982256023598	1.01978733954704	1
ebi-a-GCST90001658	ukb-saige-740.1	Osteoarthritis; localized || id:ukb-saige-740.1	CD39+ CD4+ T cell %T cell || id:ebi-a-GCST90001658	Bayesian Weighted Mendelian Randomization	6	-0.00748995	0.0157249868046422	0.633854	-0.0383109	0.0233310197103412	0.992538025382488	0.962413652470153	1.02360531700866	1
ebi-a-GCST90001658	ukb-saige-740.1	Osteoarthritis; localized || id:ukb-saige-740.1	CD39+ CD4+ T cell %T cell || id:ebi-a-GCST90001658	MR Egger	6	-0.0166094	0.0238670860513696	0.5248	-0.0633889	0.0301700687881547	0.983527756021019	0.938578381558334	1.03062979701032	0.998524067790455
ebi-a-GCST90001658	ukb-saige-740.1	Osteoarthritis; localized || id:ukb-saige-740.1	CD39+ CD4+ T cell %T cell || id:ebi-a-GCST90001658	Weighted median	6	-0.00904681	0.00998566183265236	0.364946	-0.0286187	0.010525085596682	0.990993987677559	0.971786927651053	1.01058066914614	0.974299104969666
ebi-a-GCST90001658	ukb-saige-740.1	Osteoarthritis; localized || id:ukb-saige-740.1	CD39+ CD4+ T cell %T cell || id:ebi-a-GCST90001658	Weighted mode	6	-0.00651651	0.0102757439750721	0.553849	-0.026657	0.0136239457418897	0.993504673972492	0.973695190281523	1.01371717459116	0.974498079964075
ebi-a-GCST90001659	ieu-a-1169	Hip osteoarthritis || id:ieu-a-1169	CD39+ CD4+ T cell %CD4+ T cell || id:ebi-a-GCST90001659	Inverse variance weighted	2	0.0577737998488523	0.132185263330312	0.662063	-0.201309	0.316856915976263	1.05948	0.817659477047834	1.37280613124696	1
ebi-a-GCST90001659	ieu-a-1169	Hip osteoarthritis || id:ieu-a-1169	CD39+ CD4+ T cell %CD4+ T cell || id:ebi-a-GCST90001659	Bayesian Weighted Mendelian Randomization	2	0.0578845991281283	0.134143553342732	0.666096	-0.205037	0.320805963679882	1.05959271073188	0.814617366108293	1.37823812669233	1
ebi-a-GCST90001659	ieu-a-1170	Knee and hip osteoarthritis || id:ieu-a-1170	CD39+ CD4+ T cell %CD4+ T cell || id:ebi-a-GCST90001659	Inverse variance weighted	2	0.0712422819238876	0.0918692158218892	0.438059	-0.108821	0.25130594493479	1.07384136670565	0.896890604816466	1.28570337860126	1
ebi-a-GCST90001659	ieu-a-1170	Knee and hip osteoarthritis || id:ieu-a-1170	CD39+ CD4+ T cell %CD4+ T cell || id:ebi-a-GCST90001659	Bayesian Weighted Mendelian Randomization	2	0.0714112322905233	0.0927998337639324	0.441585	-0.110476	0.253298906467831	1.07402280792511	0.895407424050489	1.28826829101464	1
ebi-a-GCST90001659	ieu-a-1171	Knee osteoarthritis || id:ieu-a-1171	CD39+ CD4+ T cell %CD4+ T cell || id:ebi-a-GCST90001659	Inverse variance weighted	2	0.165284779929805	0.212142545656971	0.435908	-0.250515	0.581084169417469	1.17972903402965	0.778400107849261	1.78797584905018	1
ebi-a-GCST90001659	ieu-a-1171	Knee osteoarthritis || id:ieu-a-1171	CD39+ CD4+ T cell %CD4+ T cell || id:ebi-a-GCST90001659	Bayesian Weighted Mendelian Randomization	2	0.00590780933350323	0.209836243454022	0.977539	-0.405371	0.417186846503387	1.00592529485582	0.66672925645245	1.51768606077799	1
ebi-a-GCST90001659	ukb-saige-740.1	Osteoarthritis; localized || id:ukb-saige-740.1	CD39+ CD4+ T cell %CD4+ T cell || id:ebi-a-GCST90001659	Inverse variance weighted	6	-0.00619263	0.0131685169469679	0.638169	-0.0320029	0.0196176668595309	0.993826508435489	0.968503754458061	1.01981135780083	1
ebi-a-GCST90001659	ukb-saige-740.1	Osteoarthritis; localized || id:ukb-saige-740.1	CD39+ CD4+ T cell %CD4+ T cell || id:ebi-a-GCST90001659	Bayesian Weighted Mendelian Randomization	6	-0.00723335	0.0155296853250919	0.641376	-0.0376715	0.0232048343355385	0.99279274880401	0.963029213091606	1.02347616113704	1
ebi-a-GCST90001659	ukb-saige-740.1	Osteoarthritis; localized || id:ukb-saige-740.1	CD39+ CD4+ T cell %CD4+ T cell || id:ebi-a-GCST90001659	MR Egger	6	-0.0160942	0.0238602922103774	0.536958	-0.0628604	0.0306719584733363	0.984034605596642	0.939074571563725	1.03114718930075	0.998524067790455
ebi-a-GCST90001659	ukb-saige-740.1	Osteoarthritis; localized || id:ukb-saige-740.1	CD39+ CD4+ T cell %CD4+ T cell || id:ebi-a-GCST90001659	Weighted median	6	-0.00876605	0.0106166527612835	0.408981	-0.0295747	0.0120425878724124	0.991272258266457	0.97085836059801	1.01211539178941	0.974299104969666
ebi-a-GCST90001659	ukb-saige-740.1	Osteoarthritis; localized || id:ukb-saige-740.1	CD39+ CD4+ T cell %CD4+ T cell || id:ebi-a-GCST90001659	Weighted mode	6	-0.00666564	0.0102335550876371	0.543566	-0.0267234	0.0133921280712253	0.99335652619934	0.973630502817199	1.01348220427322	0.974498079964075
ebi-a-GCST90001660	ieu-a-1170	Knee and hip osteoarthritis || id:ieu-a-1170	CD39+ CD4+ T cell Absolute Count || id:ebi-a-GCST90001660	Wald ratio	1	0.107273022751896	0.108441495124594	0.322553	-0.105272	0.3198183531961	1.11323815233579	0.90007939067036	1.37687763619718	1
ebi-a-GCST90001660	ieu-a-1171	Knee osteoarthritis || id:ieu-a-1171	CD39+ CD4+ T cell Absolute Count || id:ebi-a-GCST90001660	Wald ratio	1	0.315649512459372	0.15661105092091	0.0438523	0.00869185265438788	0.622607172264355	1.37114960054783	1.00872973648635	1.86378091086234	0.900659323502345
ebi-a-GCST90001660	ukb-saige-740.1	Osteoarthritis; localized || id:ukb-saige-740.1	CD39+ CD4+ T cell Absolute Count || id:ebi-a-GCST90001660	Inverse variance weighted	5	-0.00890701	0.03243480984835	0.783614	-0.0724792	0.0546652130110299	0.991132535648992	0.930085053542577	1.05618695782754	1
ebi-a-GCST90001660	ukb-saige-740.1	Osteoarthritis; localized || id:ukb-saige-740.1	CD39+ CD4+ T cell Absolute Count || id:ebi-a-GCST90001660	Bayesian Weighted Mendelian Randomization	5	-0.0134209	0.0344728413690839	0.697042	-0.0809876	0.0541459128505395	0.986668801913596	0.922205103370487	1.05563862215856	1
ebi-a-GCST90001660	ukb-saige-740.1	Osteoarthritis; localized || id:ukb-saige-740.1	CD39+ CD4+ T cell Absolute Count || id:ebi-a-GCST90001660	MR Egger	5	-0.105275	0.0854227974312696	0.305576	-0.272704	0.0621533671293349	0.900076683106333	0.761318105351952	1.06412553409219	0.998524067790455
ebi-a-GCST90001660	ukb-saige-740.1	Osteoarthritis; localized || id:ukb-saige-740.1	CD39+ CD4+ T cell Absolute Count || id:ebi-a-GCST90001660	Weighted median	5	-0.0268769	0.0260107247805943	0.301464	-0.0778579	0.0241041524279366	0.973481100681572	0.925095883770113	1.02439700576995	0.974299104969666
ebi-a-GCST90001660	ukb-saige-740.1	Osteoarthritis; localized || id:ukb-saige-740.1	CD39+ CD4+ T cell Absolute Count || id:ebi-a-GCST90001660	Weighted mode	5	-0.0265885	0.0267348927573956	0.376259	-0.0789889	0.02581191125913	0.973761882988959	0.924050210591491	1.02614792345023	0.974498079964075
ebi-a-GCST90001661	ieu-a-1169	Hip osteoarthritis || id:ieu-a-1169	CD28- CD8dim T cell %T cell || id:ebi-a-GCST90001661	Inverse variance weighted	2	0.0185550541278991	0.17350321405603	0.914834	-0.321511	0.358621353677719	1.01872826882215	0.725052476460584	1.4313547217486	1
ebi-a-GCST90001661	ieu-a-1169	Hip osteoarthritis || id:ieu-a-1169	CD28- CD8dim T cell %T cell || id:ebi-a-GCST90001661	Bayesian Weighted Mendelian Randomization	2	0.0465110845891531	0.184676078713941	0.801155	-0.315454	0.408476198868478	1.0476096913272	0.729457603661618	1.50452344297143	1
ebi-a-GCST90001661	ieu-a-1170	Knee and hip osteoarthritis || id:ieu-a-1170	CD28- CD8dim T cell %T cell || id:ebi-a-GCST90001661	Inverse variance weighted	2	0.0171907663231523	0.100190089059929	0.863767	-0.179182	0.213563340880613	1.01733937790754	0.835953902277354	1.2380819169834	1
ebi-a-GCST90001661	ieu-a-1170	Knee and hip osteoarthritis || id:ieu-a-1170	CD28- CD8dim T cell %T cell || id:ebi-a-GCST90001661	Bayesian Weighted Mendelian Randomization	2	0.0173601747603392	0.1033423149898	0.866593	-0.185191	0.219911112140346	1.01751173838089	0.830945755342858	1.24596597441635	1
ebi-a-GCST90001661	ieu-a-1171	Knee osteoarthritis || id:ieu-a-1171	CD28- CD8dim T cell %T cell || id:ebi-a-GCST90001661	Inverse variance weighted	2	0.0177803566474796	0.147256053447633	0.903893	-0.270842	0.30640222140484	1.01793936821817	0.762737374513864	1.3585286259623	1
ebi-a-GCST90001661	ieu-a-1171	Knee osteoarthritis || id:ieu-a-1171	CD28- CD8dim T cell %T cell || id:ebi-a-GCST90001661	Bayesian Weighted Mendelian Randomization	2	0.0183615604024183	0.151919852199857	0.903799	-0.279401	0.316124470714139	1.01853117036343	0.756236326917743	1.37180099404924	1
ebi-a-GCST90001661	ukb-saige-740.1	Osteoarthritis; localized || id:ukb-saige-740.1	CD28- CD8dim T cell %T cell || id:ebi-a-GCST90001661	Inverse variance weighted	3	-0.0190104	0.0468748369521686	0.685068	-0.110885	0.0728642377041883	0.981169116112932	0.895041562580302	1.0755845031805	1
ebi-a-GCST90001661	ukb-saige-740.1	Osteoarthritis; localized || id:ukb-saige-740.1	CD28- CD8dim T cell %T cell || id:ebi-a-GCST90001661	Bayesian Weighted Mendelian Randomization	3	-0.0188157	0.0482123227942402	0.696339	-0.113312	0.0756804982310396	0.981360254969107	0.892872212792017	1.07861789877133	1
ebi-a-GCST90001661	ukb-saige-740.1	Osteoarthritis; localized || id:ukb-saige-740.1	CD28- CD8dim T cell %T cell || id:ebi-a-GCST90001661	MR Egger	3	-0.0820497	0.124715749584188	0.629548	-0.326493	0.162393216005119	0.921226215749708	0.721449769766567	1.17632269930465	0.998524067790455
ebi-a-GCST90001661	ukb-saige-740.1	Osteoarthritis; localized || id:ukb-saige-740.1	CD28- CD8dim T cell %T cell || id:ebi-a-GCST90001661	Weighted median	3	-0.0368703	0.0555887330513454	0.507158	-0.145824	0.0720835865358381	0.963801103099711	0.864309594818782	1.0747451745355	0.974299104969666
ebi-a-GCST90001661	ukb-saige-740.1	Osteoarthritis; localized || id:ukb-saige-740.1	CD28- CD8dim T cell %T cell || id:ebi-a-GCST90001661	Weighted mode	3	-0.0430436	0.0677402237063244	0.590158	-0.175814	0.0897272071516181	0.957869596047328	0.838773586752511	1.09387584149403	0.974498079964075
ebi-a-GCST90001662	ieu-a-1169	Hip osteoarthritis || id:ieu-a-1169	CD28- CD8dim T cell %CD8dim T cell || id:ebi-a-GCST90001662	Wald ratio	1	0.224674989049496	0.223047306176084	0.313792	-0.212498	0.661847709154621	1.25191576373112	0.808562150901912	1.93837057266438	1
ebi-a-GCST90001662	ieu-a-1170	Knee and hip osteoarthritis || id:ieu-a-1170	CD28- CD8dim T cell %CD8dim T cell || id:ebi-a-GCST90001662	Wald ratio	1	0.0440223390275953	0.158279894875164	0.780913	-0.266206	0.354250932982917	1.04500569903885	0.766281061955629	1.42511274940905	1
ebi-a-GCST90001662	ieu-a-1171	Knee osteoarthritis || id:ieu-a-1171	CD28- CD8dim T cell %CD8dim T cell || id:ebi-a-GCST90001662	Wald ratio	1	-0.0435844	0.221994305738064	0.844351	-0.478693	0.391524388961892	0.957351702053217	0.619592491056163	1.47923400404979	1
ebi-a-GCST90001662	ukb-saige-740.1	Osteoarthritis; localized || id:ukb-saige-740.1	CD28- CD8dim T cell %CD8dim T cell || id:ebi-a-GCST90001662	Wald ratio	1	-0.0411739	0.0876040297853701	0.638355	-0.212878	0.130530004380201	0.959662235933271	0.808254906090891	1.13943212733543	1
ebi-a-GCST90001663	ieu-a-1169	Hip osteoarthritis || id:ieu-a-1169	CD28- CD8dim T cell Absolute Count || id:ebi-a-GCST90001663	Wald ratio	1	-0.126292	0.191624362244898	0.509857	-0.501876	0.249291658163265	0.881357371888515	0.605393970583707	1.28311620981832	1
ebi-a-GCST90001663	ieu-a-1171	Knee osteoarthritis || id:ieu-a-1171	CD28- CD8dim T cell Absolute Count || id:ebi-a-GCST90001663	Wald ratio	1	0.0640963010204082	0.197445153061225	0.745462	-0.322896	0.451088801020408	1.06619506949092	0.724049007493166	1.5700206953429	1
ebi-a-GCST90001663	ukb-saige-740.1	Osteoarthritis; localized || id:ukb-saige-740.1	CD28- CD8dim T cell Absolute Count || id:ebi-a-GCST90001663	Inverse variance weighted	2	0.0526636494978315	0.0500612118562279	0.292806	-0.0454563	0.150783624736038	1.05407504681672	0.955561335094466	1.16274504159571	1
ebi-a-GCST90001663	ukb-saige-740.1	Osteoarthritis; localized || id:ukb-saige-740.1	CD28- CD8dim T cell Absolute Count || id:ebi-a-GCST90001663	Bayesian Weighted Mendelian Randomization	2	0.0537879500329075	0.0520432748153331	0.301359	-0.0482169	0.15579276867096	1.05526081040828	0.952927104694854	1.16858401077817	1
ebi-a-GCST90001664	ieu-a-1171	Knee osteoarthritis || id:ieu-a-1171	CD28+ CD45RA+ CD8dim T cell %T cell || id:ebi-a-GCST90001664	Wald ratio	1	-0.0582289	0.16356315179606	0.721839	-0.378813	0.262354924681344	0.943434015176665	0.684673887748879	1.29998785833471	1
ebi-a-GCST90001664	ukb-saige-740.1	Osteoarthritis; localized || id:ukb-saige-740.1	CD28+ CD45RA+ CD8dim T cell %T cell || id:ebi-a-GCST90001664	Inverse variance weighted	6	-0.00530328	0.0136471775857121	0.697573	-0.0320517	0.0214451917941267	0.994710761269796	0.968456468640071	1.02167679253085	1
ebi-a-GCST90001664	ukb-saige-740.1	Osteoarthritis; localized || id:ukb-saige-740.1	CD28+ CD45RA+ CD8dim T cell %T cell || id:ebi-a-GCST90001664	Bayesian Weighted Mendelian Randomization	6	-0.00538014	0.0140370961010809	0.701512	-0.0328928	0.0221325730399029	0.994634311689242	0.967642243019151	1.02237931542014	1
ebi-a-GCST90001664	ukb-saige-740.1	Osteoarthritis; localized || id:ukb-saige-740.1	CD28+ CD45RA+ CD8dim T cell %T cell || id:ebi-a-GCST90001664	MR Egger	6	-0.00848498	0.0170941650721353	0.645674	-0.0419895	0.0250195797090705	0.991550912045941	0.958879803332353	1.02533519609273	0.998524067790455
ebi-a-GCST90001664	ukb-saige-740.1	Osteoarthritis; localized || id:ukb-saige-740.1	CD28+ CD45RA+ CD8dim T cell %T cell || id:ebi-a-GCST90001664	Weighted median	6	-0.00492081	0.0157680437872882	0.754984	-0.0358262	0.0259845609245125	0.995091282427268	0.964807990784128	1.02632510284038	0.974299104969666
ebi-a-GCST90001664	ukb-saige-740.1	Osteoarthritis; localized || id:ukb-saige-740.1	CD28+ CD45RA+ CD8dim T cell %T cell || id:ebi-a-GCST90001664	Weighted mode	6	-0.00484617	0.0151505150202845	0.762002	-0.0345412	0.0248488405053174	0.995165554796192	0.966048558558399	1.02516014612214	0.974498079964075
ebi-a-GCST90001665	ukb-saige-740.1	Osteoarthritis; localized || id:ukb-saige-740.1	CD28+ CD45RA+ CD8dim T cell %CD8dim T cell || id:ebi-a-GCST90001665	Inverse variance weighted	5	-0.000281449	0.0128991356029231	0.982592	-0.0255638	0.0250008563813965	0.999718590202834	0.974760230968641	1.0253159985856	1
ebi-a-GCST90001665	ukb-saige-740.1	Osteoarthritis; localized || id:ukb-saige-740.1	CD28+ CD45RA+ CD8dim T cell %CD8dim T cell || id:ebi-a-GCST90001665	Bayesian Weighted Mendelian Randomization	5	-0.000146433	0.0132429995857779	0.991178	-0.0261027	0.0258098463538889	0.999853577886528	0.974235018820563	1.02614580455419	1
ebi-a-GCST90001665	ukb-saige-740.1	Osteoarthritis; localized || id:ukb-saige-740.1	CD28+ CD45RA+ CD8dim T cell %CD8dim T cell || id:ebi-a-GCST90001665	MR Egger	5	-0.00680572	0.0154709200191717	0.68977	-0.0371287	0.0235172814309593	0.993217384669572	0.963552094079722	1.02379599325353	0.998524067790455
ebi-a-GCST90001665	ukb-saige-740.1	Osteoarthritis; localized || id:ukb-saige-740.1	CD28+ CD45RA+ CD8dim T cell %CD8dim T cell || id:ebi-a-GCST90001665	Weighted median	5	-0.00235515	0.014383239974804	0.869934	-0.0305463	0.025835998272983	0.997647619117066	0.969915521583641	1.02617264058715	0.974299104969666
ebi-a-GCST90001665	ukb-saige-740.1	Osteoarthritis; localized || id:ukb-saige-740.1	CD28+ CD45RA+ CD8dim T cell %CD8dim T cell || id:ebi-a-GCST90001665	Weighted mode	5	-0.00329851	0.0151434793271695	0.838232	-0.0329797	0.0263827053529283	0.99670691999292	0.967558168301929	1.02673380981863	0.978812160446256
ebi-a-GCST90001667	ukb-saige-740.1	Osteoarthritis; localized || id:ukb-saige-740.1	CD28+ CD45RA- CD8dim T cell %T cell || id:ebi-a-GCST90001667	Inverse variance weighted	3	0.00673157936221356	0.013570645025428	0.619866	-0.0198669	0.0333300436120524	1.00675428736755	0.980329161248068	1.03389171229241	1
ebi-a-GCST90001667	ukb-saige-740.1	Osteoarthritis; localized || id:ukb-saige-740.1	CD28+ CD45RA- CD8dim T cell %T cell || id:ebi-a-GCST90001667	Bayesian Weighted Mendelian Randomization	3	0.00678075367009543	0.0138220372192663	0.623727	-0.0203104	0.0338719466198574	1.00680379503008	0.979894428363918	1.03445213315421	1
ebi-a-GCST90001667	ukb-saige-740.1	Osteoarthritis; localized || id:ukb-saige-740.1	CD28+ CD45RA- CD8dim T cell %T cell || id:ebi-a-GCST90001667	MR Egger	3	0.00839317686484381	0.0391828119403445	0.865663	-0.0684051	0.0851914882679191	1.00842849832438	0.933882049053261	1.08892556320544	0.998524067790455
ebi-a-GCST90001667	ukb-saige-740.1	Osteoarthritis; localized || id:ukb-saige-740.1	CD28+ CD45RA- CD8dim T cell %T cell || id:ebi-a-GCST90001667	Weighted median	3	0.00659307256152011	0.014881704152814	0.657743	-0.0225751	0.0357612127010356	1.00661485470853	0.977677842530893	1.03640833579377	0.974299104969666
ebi-a-GCST90001667	ukb-saige-740.1	Osteoarthritis; localized || id:ukb-saige-740.1	CD28+ CD45RA- CD8dim T cell %T cell || id:ebi-a-GCST90001667	Weighted mode	3	0.00716388430446616	0.0184464430785511	0.735191	-0.0289911	0.0433189127384264	1.0071896063101	0.971425067243114	1.04427087303608	0.974498079964075
ebi-a-GCST90001668	ukb-saige-740.1	Osteoarthritis; localized || id:ukb-saige-740.1	CD28+ CD45RA- CD8dim T cell %CD8dim T cell || id:ebi-a-GCST90001668	Inverse variance weighted	2	0.00354678893421941	0.0149388370443734	0.81233	-0.0257333	0.0328269095411913	1.00355308623295	0.97459494856381	1.03337165698612	1
ebi-a-GCST90001668	ukb-saige-740.1	Osteoarthritis; localized || id:ukb-saige-740.1	CD28+ CD45RA- CD8dim T cell %CD8dim T cell || id:ebi-a-GCST90001668	Bayesian Weighted Mendelian Randomization	2	0.00354752156701611	0.0152134034234104	0.815619	-0.0262707	0.0333657922769004	1.00355382146913	0.974071324927013	1.03392867320137	1
ebi-a-GCST90001669	ukb-saige-740.1	Osteoarthritis; localized || id:ukb-saige-740.1	CD28+ CD45RA- CD8dim T cell Absolute Count || id:ebi-a-GCST90001669	Inverse variance weighted	3	0.00750626706381707	0.0137608790586818	0.585424	-0.0194651	0.0344775900188335	1.00753450970782	0.980723165086881	1.03507883201907	1
ebi-a-GCST90001669	ukb-saige-740.1	Osteoarthritis; localized || id:ukb-saige-740.1	CD28+ CD45RA- CD8dim T cell Absolute Count || id:ebi-a-GCST90001669	Bayesian Weighted Mendelian Randomization	3	0.00754732128405321	0.0139992409710259	0.589802	-0.0198912	0.034985833587264	1.00757587410056	0.980305333528111	1.03560503788731	1
ebi-a-GCST90001669	ukb-saige-740.1	Osteoarthritis; localized || id:ukb-saige-740.1	CD28+ CD45RA- CD8dim T cell Absolute Count || id:ebi-a-GCST90001669	MR Egger	3	0.0162846608631718	0.040666970464347	0.757521	-0.0634226	0.0959919229732918	1.01641797864805	0.938546758838338	1.10075017316953	0.998524067790455
ebi-a-GCST90001669	ukb-saige-740.1	Osteoarthritis; localized || id:ukb-saige-740.1	CD28+ CD45RA- CD8dim T cell Absolute Count || id:ebi-a-GCST90001669	Weighted median	3	0.00719108211149818	0.0153757449883516	0.640006	-0.0229454	0.0373275422886674	1.00721700003118	0.977315865198373	1.03803296485512	0.974299104969666
ebi-a-GCST90001669	ukb-saige-740.1	Osteoarthritis; localized || id:ukb-saige-740.1	CD28+ CD45RA- CD8dim T cell Absolute Count || id:ebi-a-GCST90001669	Weighted mode	3	0.00740488915678351	0.0186471638534602	0.72966	-0.0291436	0.0439533303095655	1.00743237314524	0.971277025702781	1.04493358702343	0.974498079964075
ebi-a-GCST90001675	ukb-saige-740.1	Osteoarthritis; localized || id:ukb-saige-740.1	CD28- CD127- CD25++ CD8+ T cell Absolute Count || id:ebi-a-GCST90001675	Wald ratio	1	-0.0894354	0.0614868641699273	0.145795	-0.20995	0.031078814980436	0.914447301040408	0.810625025409649	1.03156680360011	1
ebi-a-GCST90001680	ukb-saige-740.1	Osteoarthritis; localized || id:ukb-saige-740.1	CD25++ CD8+ T cell %CD8+ T cell || id:ebi-a-GCST90001680	Wald ratio	1	0.0563985497515778	0.0349133879414529	0.106227	-0.0120317	0.124828790116826	1.05801927303731	0.988040400759153	1.1329544634595	1
ebi-a-GCST90001681	ieu-a-1171	Knee osteoarthritis || id:ieu-a-1171	CD25++ CD8+ T cell Absolute Count || id:ebi-a-GCST90001681	Inverse variance weighted	2	-0.15497	0.255964782495807	0.544889	-0.656661	0.346720561101509	0.856440516965229	0.51857978515623	1.41442142577674	1
ebi-a-GCST90001681	ieu-a-1171	Knee osteoarthritis || id:ieu-a-1171	CD25++ CD8+ T cell Absolute Count || id:ebi-a-GCST90001681	Bayesian Weighted Mendelian Randomization	2	-0.0726963	0.255364768267077	0.775892	-0.573211	0.427818682403008	0.929883226705763	0.563712330897999	1.53390793125152	1
ebi-a-GCST90001681	ukb-saige-740.1	Osteoarthritis; localized || id:ukb-saige-740.1	CD25++ CD8+ T cell Absolute Count || id:ebi-a-GCST90001681	Inverse variance weighted	3	0.00567907876872727	0.0540527138541837	0.916324	-0.100264	0.111622397922927	1.00569523530683	0.904598355034268	1.11809058759624	1
ebi-a-GCST90001681	ukb-saige-740.1	Osteoarthritis; localized || id:ukb-saige-740.1	CD25++ CD8+ T cell Absolute Count || id:ebi-a-GCST90001681	Bayesian Weighted Mendelian Randomization	3	0.0134973146155963	0.0522183687002401	0.796038	-0.0888507	0.115845317268067	1.01358881457096	0.914982181161319	1.12282217749793	1
ebi-a-GCST90001681	ukb-saige-740.1	Osteoarthritis; localized || id:ukb-saige-740.1	CD25++ CD8+ T cell Absolute Count || id:ebi-a-GCST90001681	MR Egger	3	0.0878789785831927	0.0677932334773792	0.418311	-0.0449958	0.220753716198856	1.09185597607494	0.956001536195976	1.24701627283387	0.998524067790455
ebi-a-GCST90001681	ukb-saige-740.1	Osteoarthritis; localized || id:ukb-saige-740.1	CD25++ CD8+ T cell Absolute Count || id:ebi-a-GCST90001681	Weighted median	3	0.00814469571200378	0.0338425454978566	0.809815	-0.0581867	0.0744760848878027	1.00817795397763	0.943473790603678	1.07731957899557	0.974299104969666
ebi-a-GCST90001681	ukb-saige-740.1	Osteoarthritis; localized || id:ukb-saige-740.1	CD25++ CD8+ T cell Absolute Count || id:ebi-a-GCST90001681	Weighted mode	3	0.045384770392812	0.0343475706325323	0.317294	-0.0219365	0.112706008832575	1.0464304179005	0.978302386538175	1.11930281943014	0.974498079964075
ebi-a-GCST90001684	ieu-a-1169	Hip osteoarthritis || id:ieu-a-1169	CD127- CD8+ T cell Absolute Count || id:ebi-a-GCST90001684	Wald ratio	1	0.214288713910761	0.139617847769029	0.124827	-0.0593623	0.487939695538058	1.23898031401219	0.942365318780433	1.62895661365845	1
ebi-a-GCST90001684	ieu-a-1170	Knee and hip osteoarthritis || id:ieu-a-1170	CD127- CD8+ T cell Absolute Count || id:ebi-a-GCST90001684	Wald ratio	1	0.269256167979003	0.112834645669291	0.0170193	0.0481002624671916	0.490412073490814	1.30899041953113	1.04927585303648	1.63298899280466	0.697643028917994
ebi-a-GCST90001684	ieu-a-1171	Knee osteoarthritis || id:ieu-a-1171	CD127- CD8+ T cell Absolute Count || id:ebi-a-GCST90001684	Wald ratio	1	0.214288713910761	0.152811023622047	0.160822	-0.0852209	0.513798320209974	1.23898031401219	0.918309414436174	1.67162853214594	1
ebi-a-GCST90001684	ukb-saige-740.1	Osteoarthritis; localized || id:ukb-saige-740.1	CD127- CD8+ T cell Absolute Count || id:ebi-a-GCST90001684	Wald ratio	1	0.131233595800525	0.057742782152231	0.0230426	0.0180577427821522	0.244409448818898	1.14023410410317	1.01822176965016	1.27686703517119	0.750290190662488
ebi-a-GCST90001686	ieu-a-1169	Hip osteoarthritis || id:ieu-a-1169	CD28- CD8+ T cell %CD8+ T cell || id:ebi-a-GCST90001686	Inverse variance weighted	2	0.269175937054518	0.156097506962513	0.084634	-0.0367752	0.575127050701044	1.30888540223251	0.963892816658606	1.77735632693705	1
ebi-a-GCST90001686	ieu-a-1169	Hip osteoarthritis || id:ieu-a-1169	CD28- CD8+ T cell %CD8+ T cell || id:ebi-a-GCST90001686	Bayesian Weighted Mendelian Randomization	2	0.272892077345378	0.164345174971198	0.0968177	-0.0492245	0.595008620288926	1.31375845287383	0.951967421777596	1.8130465738781	1
ebi-a-GCST90001686	ieu-a-1170	Knee and hip osteoarthritis || id:ieu-a-1170	CD28- CD8+ T cell %CD8+ T cell || id:ebi-a-GCST90001686	Inverse variance weighted	2	0.187120786585239	0.11308598848115	0.09799	-0.0345278	0.408769324008292	1.2057729174478	0.966061530297655	1.50496452125841	1
ebi-a-GCST90001686	ieu-a-1170	Knee and hip osteoarthritis || id:ieu-a-1170	CD28- CD8+ T cell %CD8+ T cell || id:ebi-a-GCST90001686	Bayesian Weighted Mendelian Randomization	2	0.187169803709179	0.123448157186791	0.129473	-0.0547886	0.42912819179529	1.2058320224169	0.946685270854571	1.53591791385271	1
ebi-a-GCST90001686	ieu-a-1171	Knee osteoarthritis || id:ieu-a-1171	CD28- CD8+ T cell %CD8+ T cell || id:ebi-a-GCST90001686	Inverse variance weighted	2	0.0748889758334322	0.14521126300687	0.606047	-0.209725	0.359503051326898	1.07776448633807	0.810807106485788	1.43261730036641	1
ebi-a-GCST90001686	ieu-a-1171	Knee osteoarthritis || id:ieu-a-1171	CD28- CD8+ T cell %CD8+ T cell || id:ebi-a-GCST90001686	Bayesian Weighted Mendelian Randomization	2	0.0762857957545796	0.149867283455245	0.610737	-0.217454	0.37002567132686	1.07927098114893	0.804564549822362	1.44777178040887	1
ebi-a-GCST90001687	ieu-a-1169	Hip osteoarthritis || id:ieu-a-1169	CD28- CD8+ T cell Absolute Count || id:ebi-a-GCST90001687	Inverse variance weighted	2	0.222674242270291	0.121477736006164	0.0667958	-0.0154221	0.460770604842373	1.24941350133043	0.984696191607827	1.5852951505356	1
ebi-a-GCST90001687	ieu-a-1169	Hip osteoarthritis || id:ieu-a-1169	CD28- CD8+ T cell Absolute Count || id:ebi-a-GCST90001687	Bayesian Weighted Mendelian Randomization	2	0.226345158809017	0.12850838877667	0.0781833	-0.0255313	0.478221600811291	1.25400842264254	0.974791883885864	1.61320293085509	1
ebi-a-GCST90001687	ieu-a-1170	Knee and hip osteoarthritis || id:ieu-a-1170	CD28- CD8+ T cell Absolute Count || id:ebi-a-GCST90001687	Inverse variance weighted	2	0.203076970347159	0.102565018324528	0.0477055	0.0020495344310843	0.404104406263234	1.2251667661297	1.00205163616239	1.49796033523511	0.964951418910509
ebi-a-GCST90001687	ieu-a-1170	Knee and hip osteoarthritis || id:ieu-a-1170	CD28- CD8+ T cell Absolute Count || id:ebi-a-GCST90001687	Bayesian Weighted Mendelian Randomization	2	0.196819223570029	0.115504098526034	0.0883807	-0.0295688	0.423207256681055	1.21752392118242	0.97086407063167	1.52685071318681	1
ebi-a-GCST90001687	ieu-a-1171	Knee osteoarthritis || id:ieu-a-1171	CD28- CD8+ T cell Absolute Count || id:ebi-a-GCST90001687	Inverse variance weighted	2	0.139533543376937	0.129587159295184	0.28159	-0.114457	0.393524375595498	1.14973737114527	0.891850029552522	1.48219541268759	1
ebi-a-GCST90001687	ieu-a-1171	Knee osteoarthritis || id:ieu-a-1171	CD28- CD8+ T cell Absolute Count || id:ebi-a-GCST90001687	Bayesian Weighted Mendelian Randomization	2	0.142670321945368	0.134409668884316	0.288481	-0.120773	0.406113272958626	1.15334950496061	0.886235440864773	1.50097256243203	1
ebi-a-GCST90001689	ukb-saige-740.1	Osteoarthritis; localized || id:ukb-saige-740.1	CD28+ CD45RA+ CD8+ T cell %CD8+ T cell || id:ebi-a-GCST90001689	Wald ratio	1	0.00120252530313659	0.0390820723519391	0.975454	-0.0753983	0.0778033871129372	1.0012032486266	0.927374005822801	1.0809101169178	1
ebi-a-GCST90001690	ukb-saige-740.1	Osteoarthritis; localized || id:ukb-saige-740.1	CD28+ CD45RA+ CD8+ T cell Absolute Count || id:ebi-a-GCST90001690	Inverse variance weighted	3	0.0326107169904429	0.120869238790833	0.787313	-0.204293	0.269514425020476	1.03314827387948	0.815223483017167	1.30932851918063	1
ebi-a-GCST90001690	ukb-saige-740.1	Osteoarthritis; localized || id:ukb-saige-740.1	CD28+ CD45RA+ CD8+ T cell Absolute Count || id:ebi-a-GCST90001690	Bayesian Weighted Mendelian Randomization	3	0.0585410028864859	0.13286358532091	0.659495	-0.201872	0.31895363011547	1.06028845969067	0.817199829774129	1.37568753295499	1
ebi-a-GCST90001690	ukb-saige-740.1	Osteoarthritis; localized || id:ukb-saige-740.1	CD28+ CD45RA+ CD8+ T cell Absolute Count || id:ebi-a-GCST90001690	MR Egger	3	1.02229817659798	0.399703033233889	0.237275	0.238880231459555	1.8057161217364	2.77957538436038	1.26982644221636	6.08432700760043	0.998524067790455
ebi-a-GCST90001690	ukb-saige-740.1	Osteoarthritis; localized || id:ukb-saige-740.1	CD28+ CD45RA+ CD8+ T cell Absolute Count || id:ebi-a-GCST90001690	Weighted median	3	0.07869085970259	0.0782813573510971	0.314786	-0.0747406	0.23212232011074	1.0818698208109	0.927984173550026	1.26127399856817	0.974299104969666
ebi-a-GCST90001690	ukb-saige-740.1	Osteoarthritis; localized || id:ukb-saige-740.1	CD28+ CD45RA+ CD8+ T cell Absolute Count || id:ebi-a-GCST90001690	Weighted mode	3	0.102697477662747	0.0838733381406409	0.345441	-0.0616943	0.267089220418403	1.10815611638343	0.940170285729863	1.30615697700411	0.974498079964075
ebi-a-GCST90001693	ukb-saige-740.1	Osteoarthritis; localized || id:ukb-saige-740.1	CD28+ CD45RA- CD8+ T cell Absolute Count || id:ebi-a-GCST90001693	Inverse variance weighted	2	0.00657279145514568	0.0150379085605524	0.662052	-0.0229015	0.0360470922338284	1.00659443965261	0.977358739756466	1.03670466607995	1
ebi-a-GCST90001693	ukb-saige-740.1	Osteoarthritis; localized || id:ukb-saige-740.1	CD28+ CD45RA- CD8+ T cell Absolute Count || id:ebi-a-GCST90001693	Bayesian Weighted Mendelian Randomization	2	0.00664768561237015	0.0153478373702632	0.664917	-0.0234341	0.036729446858086	1.00666983051796	0.976838369997076	1.03741230770665	1
ebi-a-GCST90001696	ieu-a-1169	Hip osteoarthritis || id:ieu-a-1169	CD45RA- CD28- CD8+ T cell %CD8+ T cell || id:ebi-a-GCST90001696	Inverse variance weighted	2	0.00714200375122791	0.00838474247950999	0.394333	-0.00929209	0.0235760990110675	1.0071675686854	0.990750946565956	1.02385621222732	1
ebi-a-GCST90001696	ieu-a-1169	Hip osteoarthritis || id:ieu-a-1169	CD45RA- CD28- CD8+ T cell %CD8+ T cell || id:ebi-a-GCST90001696	Bayesian Weighted Mendelian Randomization	2	0.00729127987091118	0.00893153815670759	0.414299	-0.0102145	0.024797094658058	1.00731792597402	0.989837456273022	1.02510709971428	1
ebi-a-GCST90001696	ieu-a-1170	Knee and hip osteoarthritis || id:ieu-a-1170	CD45RA- CD28- CD8+ T cell %CD8+ T cell || id:ebi-a-GCST90001696	Inverse variance weighted	2	0.0045838894540554	0.0111763658219498	0.681702	-0.0173218	0.0264895664650771	1.00459441154655	0.982827372125928	1.02684353359792	1
ebi-a-GCST90001696	ieu-a-1170	Knee and hip osteoarthritis || id:ieu-a-1170	CD45RA- CD28- CD8+ T cell %CD8+ T cell || id:ebi-a-GCST90001696	Bayesian Weighted Mendelian Randomization	2	0.0108133982893758	0.00837289215245808	0.196538	-0.00559747	0.0272242669081937	1.01087207438594	0.994418166318774	1.02759823320219	1
ebi-a-GCST90001696	ieu-a-1171	Knee osteoarthritis || id:ieu-a-1171	CD45RA- CD28- CD8+ T cell %CD8+ T cell || id:ebi-a-GCST90001696	Inverse variance weighted	2	0.00861680357329526	0.0096310574361586	0.370953	-0.0102601	0.0274936761481661	1.00865403508725	0.989792385955941	1.02787511495677	1
ebi-a-GCST90001696	ieu-a-1171	Knee osteoarthritis || id:ieu-a-1171	CD45RA- CD28- CD8+ T cell %CD8+ T cell || id:ebi-a-GCST90001696	Bayesian Weighted Mendelian Randomization	2	0.011042876211649	0.00927532277427577	0.233824	-0.00713676	0.0292225088492295	1.01110407382761	0.992888649745064	1.02965367604241	1
ebi-a-GCST90001696	ukb-saige-740.1	Osteoarthritis; localized || id:ukb-saige-740.1	CD45RA- CD28- CD8+ T cell %CD8+ T cell || id:ebi-a-GCST90001696	Inverse variance weighted	9	0.00105025489443464	0.000711221307911851	0.139758	-0.000343739	0.00244424865794187	1.00105080660524	0.999656320202364	1.00244723826898	1
ebi-a-GCST90001696	ukb-saige-740.1	Osteoarthritis; localized || id:ukb-saige-740.1	CD45RA- CD28- CD8+ T cell %CD8+ T cell || id:ebi-a-GCST90001696	MR Egger	9	0.00143399679438623	0.000802951360162202	0.117278	-0.000139788	0.00300778146030415	1.00143502545943	0.999860221898338	1.00301230937348	0.998524067790455
ebi-a-GCST90001696	ukb-saige-740.1	Osteoarthritis; localized || id:ukb-saige-740.1	CD45RA- CD28- CD8+ T cell %CD8+ T cell || id:ebi-a-GCST90001696	Weighted median	9	0.00129273449366387	0.000580813698239256	0.0260323	0.000154339645114933	0.00243112934221281	1.00129357043508	1.00015435155609	1.00243408693343	0.974299104969666
ebi-a-GCST90001696	ukb-saige-740.1	Osteoarthritis; localized || id:ukb-saige-740.1	CD45RA- CD28- CD8+ T cell %CD8+ T cell || id:ebi-a-GCST90001696	Weighted mode	9	0.00131547790248418	0.000532648583174004	0.038729	0.000271486679463136	0.00235946912550523	1.00131634352307	1.00027152353531	1.00236225486331	0.974498079964075
ebi-a-GCST90001697	ieu-a-1169	Hip osteoarthritis || id:ieu-a-1169	CD45RA- CD28- CD8+ T cell %T cell || id:ebi-a-GCST90001697	Inverse variance weighted	2	0.0122704716438133	0.0138263482438935	0.374826	-0.0148292	0.0393701142018446	1.01234606274407	0.985280239749969	1.04015538869783	1
ebi-a-GCST90001697	ieu-a-1169	Hip osteoarthritis || id:ieu-a-1169	CD45RA- CD28- CD8+ T cell %T cell || id:ebi-a-GCST90001697	Bayesian Weighted Mendelian Randomization	2	0.0125643897801935	0.0144567652376535	0.384792	-0.0157709	0.0408996496459943	1.0126436533437	0.984352838899451	1.04174756056352	1
ebi-a-GCST90001697	ieu-a-1170	Knee and hip osteoarthritis || id:ieu-a-1170	CD45RA- CD28- CD8+ T cell %T cell || id:ebi-a-GCST90001697	Inverse variance weighted	2	0.00905069941774831	0.0156618376996116	0.563344	-0.0216465	0.0397479013089871	1.00909178084273	0.97858610168253	1.04054842022956	1
ebi-a-GCST90001697	ieu-a-1170	Knee and hip osteoarthritis || id:ieu-a-1170	CD45RA- CD28- CD8+ T cell %T cell || id:ebi-a-GCST90001697	Bayesian Weighted Mendelian Randomization	2	0.0134671765422141	0.0167455851403143	0.421268	-0.0193542	0.0462885234172302	1.0135582674172	0.980831919152191	1.04737656003053	1
ebi-a-GCST90001697	ieu-a-1171	Knee osteoarthritis || id:ieu-a-1171	CD45RA- CD28- CD8+ T cell %T cell || id:ebi-a-GCST90001697	Inverse variance weighted	2	0.0140330598346592	0.016224467679995	0.387076	-0.0177669	0.0458330164874493	1.01413198542006	0.982390003906013	1.04689958139113	1
ebi-a-GCST90001697	ieu-a-1171	Knee osteoarthritis || id:ieu-a-1171	CD45RA- CD28- CD8+ T cell %T cell || id:ebi-a-GCST90001697	Bayesian Weighted Mendelian Randomization	2	0.0165250854978062	0.0172699969950968	0.338635	-0.0173241	0.0503742796081959	1.01666237994808	0.982825090931583	1.05166463935304	1
ebi-a-GCST90001697	ukb-saige-740.1	Osteoarthritis; localized || id:ukb-saige-740.1	CD45RA- CD28- CD8+ T cell %T cell || id:ebi-a-GCST90001697	Inverse variance weighted	41	0.000263525572423342	0.000350413015039645	0.452025	-0.000423284	0.000950335081901047	1.00026356029834	0.999576805634953	1.00095078679337	1
ebi-a-GCST90001697	ukb-saige-740.1	Osteoarthritis; localized || id:ukb-saige-740.1	CD45RA- CD28- CD8+ T cell %T cell || id:ebi-a-GCST90001697	MR Egger	41	0.000316785372537943	0.000481690322027219	0.514624	-0.000627328	0.00126089840371129	1.00031683555432	0.99937286907022	1.00126169367032	0.998524067790455
ebi-a-GCST90001697	ukb-saige-740.1	Osteoarthritis; localized || id:ukb-saige-740.1	CD45RA- CD28- CD8+ T cell %T cell || id:ebi-a-GCST90001697	Weighted median	41	0.000602327627632332	0.000493474164884677	0.222243	-0.000364882	0.0015695369908063	1.00060250906334	0.999635184825703	1.00157076935865	0.974299104969666
ebi-a-GCST90001697	ukb-saige-740.1	Osteoarthritis; localized || id:ukb-saige-740.1	CD45RA- CD28- CD8+ T cell %T cell || id:ebi-a-GCST90001697	Weighted mode	41	0.000636935409335914	0.000521629063079728	0.229216	-0.000385458	0.00165932837297218	1.00063713829577	0.999614616724919	1.00166070582007	0.974498079964075
ebi-a-GCST90001698	ieu-a-1169	Hip osteoarthritis || id:ieu-a-1169	CD45RA+ CD28- CD8+ T cell Absolute Count || id:ebi-a-GCST90001698	Inverse variance weighted	5	-8.07e-05	8.20988066596091e-05	0.325895	-0.000241569	8.02584247541582e-05	0.999919348016248	0.999758460278065	1.00008026164555	1
ebi-a-GCST90001698	ieu-a-1169	Hip osteoarthritis || id:ieu-a-1169	CD45RA+ CD28- CD8+ T cell Absolute Count || id:ebi-a-GCST90001698	MR Egger	5	-0.000122984	0.000129776324152018	0.413214	-0.000377346	0.000131377297469312	0.99987702326439	0.999622725292801	1.00013138592784	0.998524067790455
ebi-a-GCST90001698	ieu-a-1169	Hip osteoarthritis || id:ieu-a-1169	CD45RA+ CD28- CD8+ T cell Absolute Count || id:ebi-a-GCST90001698	Weighted median	5	-7.5e-05	9.11463106651517e-05	0.410572	-0.00025365	0.000103643683214297	0.999924999726972	0.999746382311812	1.00010364905441	0.974299104969666
ebi-a-GCST90001698	ieu-a-1169	Hip osteoarthritis || id:ieu-a-1169	CD45RA+ CD28- CD8+ T cell Absolute Count || id:ebi-a-GCST90001698	Weighted mode	5	-8.59e-05	0.000103285930559266	0.452367	-0.000288339	0.00011654184415713	0.999914105109438	0.99971170256206	1.00011654863542	0.974498079964075
ebi-a-GCST90001698	ukb-saige-740.1	Osteoarthritis; localized || id:ukb-saige-740.1	CD45RA+ CD28- CD8+ T cell Absolute Count || id:ebi-a-GCST90001698	Inverse variance weighted	430	2.51520244101004e-07	4.24369071952691e-06	0.952738	-8.07e-06	8.56915405437375e-06	1.00000025152028	0.999991933918965	1.00000856919077	1
ebi-a-GCST90001698	ukb-saige-740.1	Osteoarthritis; localized || id:ukb-saige-740.1	CD45RA+ CD28- CD8+ T cell Absolute Count || id:ebi-a-GCST90001698	MR Egger	430	4.46017808872011e-06	5.9113459052176e-06	0.450957	-7.13e-06	1.60464160629466e-05	1.00000446018804	0.999992873965505	1.00001604654481	0.998524067790455
ebi-a-GCST90001698	ukb-saige-740.1	Osteoarthritis; localized || id:ukb-saige-740.1	CD45RA+ CD28- CD8+ T cell Absolute Count || id:ebi-a-GCST90001698	Weighted median	430	4.9591386217123e-06	7.34129975287253e-06	0.49935	-9.43e-06	1.93480861373425e-05	1.00000495915092	0.999990570235567	1.00001934827331	0.974299104969666
ebi-a-GCST90001698	ukb-saige-740.1	Osteoarthritis; localized || id:ukb-saige-740.1	CD45RA+ CD28- CD8+ T cell Absolute Count || id:ebi-a-GCST90001698	Weighted mode	430	2.67534332977211e-06	5.70754423677066e-06	0.639495	-8.51e-06	1.38621300338426e-05	1.00000267534691	0.999991488592848	1.00001386222611	0.974498079964075
ebi-a-GCST90001699	ieu-a-1169	Hip osteoarthritis || id:ieu-a-1169	CD45RA+ CD28- CD8+ T cell %CD8+ T cell || id:ebi-a-GCST90001699	Wald ratio	1	-0.0142881	0.0107350091074681	0.183197	-0.0353287	0.00675256684881603	0.985813538783338	0.965288103981664	1.0067754168314	1
ebi-a-GCST90001699	ieu-a-1170	Knee and hip osteoarthritis || id:ieu-a-1170	CD45RA+ CD28- CD8+ T cell %CD8+ T cell || id:ebi-a-GCST90001699	Wald ratio	1	-0.00362489	0.00824579234972678	0.660223	-0.0197866	0.0125368604735883	0.996381669459825	0.980407825378969	1.0126157763498	1
ebi-a-GCST90001699	ukb-saige-740.1	Osteoarthritis; localized || id:ukb-saige-740.1	CD45RA+ CD28- CD8+ T cell %CD8+ T cell || id:ebi-a-GCST90001699	Wald ratio	1	0.00619307832422587	0.00437158469945355	0.15658	-0.00237523	0.0147613843351548	1.00621229508361	0.997627590934515	1.01487087163358	1
ebi-a-GCST90001700	ieu-a-1169	Hip osteoarthritis || id:ieu-a-1169	CD45RA+ CD28- CD8+ T cell %T cell || id:ebi-a-GCST90001700	Inverse variance weighted	2	-0.00350647	0.00463009758030265	0.448857	-0.0125815	0.00556851780502751	0.996499667046408	0.98749735103194	1.00558405081887	1
ebi-a-GCST90001700	ieu-a-1169	Hip osteoarthritis || id:ieu-a-1169	CD45RA+ CD28- CD8+ T cell %T cell || id:ebi-a-GCST90001700	Bayesian Weighted Mendelian Randomization	2	-0.00357657	0.00483584239903069	0.459545	-0.0130548	0.00590168364224018	0.996429820839207	0.987030025970576	1.0059191328869	1
ebi-a-GCST90001700	ieu-a-1170	Knee and hip osteoarthritis || id:ieu-a-1170	CD45RA+ CD28- CD8+ T cell %T cell || id:ebi-a-GCST90001700	Inverse variance weighted	2	-0.000853229	0.00343987318515489	0.804103	-0.00759538	0.00588892201774386	0.999147134471563	0.992433391146316	1.00590629580656	1
ebi-a-GCST90001700	ieu-a-1170	Knee and hip osteoarthritis || id:ieu-a-1170	CD45RA+ CD28- CD8+ T cell %T cell || id:ebi-a-GCST90001700	Bayesian Weighted Mendelian Randomization	2	-0.000870614	0.00357075343721808	0.807372	-0.00786929	0.00612806319440923	0.999129765331473	0.992161591526208	1.00614687818719	1
ebi-a-GCST90001700	ieu-a-1171	Knee osteoarthritis || id:ieu-a-1171	CD45RA+ CD28- CD8+ T cell %T cell || id:ebi-a-GCST90001700	Inverse variance weighted	2	-0.000474582	0.00439595156649466	0.914028	-0.00909065	0.00814148296085355	0.999525530486801	0.990950547828997	1.00817471495795	1
ebi-a-GCST90001700	ieu-a-1171	Knee osteoarthritis || id:ieu-a-1171	CD45RA+ CD28- CD8+ T cell %T cell || id:ebi-a-GCST90001700	Bayesian Weighted Mendelian Randomization	2	-0.000485826	0.00456245803514699	0.915199	-0.00942824	0.00845659164971655	0.999514291895219	0.990616062689356	1.00849244962837	1
ebi-a-GCST90001701	ukb-saige-740.1	Osteoarthritis; localized || id:ukb-saige-740.1	BAFF-R on CD20- CD38- B cell || id:ebi-a-GCST90001701	Wald ratio	1	0.0123290310152186	0.0404546330186862	0.760547	-0.066962	0.0916201117318436	1.01240534682895	0.935230692947365	1.09594840504827	1
ebi-a-GCST90001702	ieu-a-1169	Hip osteoarthritis || id:ieu-a-1169	BAFF-R on CD24+ CD27+ B cell || id:ebi-a-GCST90001702	Wald ratio	1	0.0328659508703433	0.142484138604197	0.817576	-0.246403	0.31213486253457	1.03341200197667	0.78160720439969	1.3663389485383	1
ebi-a-GCST90001702	ieu-a-1170	Knee and hip osteoarthritis || id:ieu-a-1170	BAFF-R on CD24+ CD27+ B cell || id:ebi-a-GCST90001702	Wald ratio	1	0.0328659508703433	0.10962355620628	0.764324	-0.181996	0.247728121034651	1.03341200197667	0.833604492023312	1.28111157755082	1
ebi-a-GCST90001702	ieu-a-1171	Knee osteoarthritis || id:ieu-a-1171	BAFF-R on CD24+ CD27+ B cell || id:ebi-a-GCST90001702	Wald ratio	1	0.0495513258500081	0.140359199609566	0.724064	-0.225553	0.324655357084757	1.05079952400952	0.79807499648966	1.3835537318114	1
ebi-a-GCST90001702	ukb-saige-740.1	Osteoarthritis; localized || id:ukb-saige-740.1	BAFF-R on CD24+ CD27+ B cell || id:ebi-a-GCST90001702	Inverse variance weighted	9	0.00219383159111508	0.0159367743994131	0.89051	-0.0290422	0.0334299094139648	1.00219623980039	0.971375426648389	1.03399496787312	1
ebi-a-GCST90001702	ukb-saige-740.1	Osteoarthritis; localized || id:ukb-saige-740.1	BAFF-R on CD24+ CD27+ B cell || id:ebi-a-GCST90001702	Bayesian Weighted Mendelian Randomization	9	0.00528441931408749	0.0166909412334886	0.751544	-0.0274298	0.0379986641317252	1.0053	0.972942955939908	1.03872984527132	1
ebi-a-GCST90001702	ukb-saige-740.1	Osteoarthritis; localized || id:ukb-saige-740.1	BAFF-R on CD24+ CD27+ B cell || id:ebi-a-GCST90001702	MR Egger	9	0.00940129585329598	0.0284574762395454	0.750793	-0.0463754	0.065177949282805	1.00944562684919	0.954683547225699	1.06734894146452	0.998524067790455
ebi-a-GCST90001702	ukb-saige-740.1	Osteoarthritis; localized || id:ukb-saige-740.1	BAFF-R on CD24+ CD27+ B cell || id:ebi-a-GCST90001702	Weighted median	9	0.00354993558355322	0.0135559338243311	0.793419	-0.0230197	0.0301195658792421	1.00355624406757	0.977243237059508	1.03057774852187	0.974299104969666
ebi-a-GCST90001702	ukb-saige-740.1	Osteoarthritis; localized || id:ukb-saige-740.1	BAFF-R on CD24+ CD27+ B cell || id:ebi-a-GCST90001702	Weighted mode	9	0.00345181944338768	0.0147038045822615	0.820294	-0.0253676	0.0322712764246202	1.00345778383281	0.974951417395719	1.0327976409577	0.978812160446256
ebi-a-GCST90001703	ieu-a-1169	Hip osteoarthritis || id:ieu-a-1169	BAFF-R on IgD+ CD24+ B cell || id:ebi-a-GCST90001703	Wald ratio	1	0.0342302609284988	0.148398847848187	0.817576	-0.256631	0.325092002710945	1.03482285856927	0.773653267279783	1.38415798640996	1
ebi-a-GCST90001703	ieu-a-1170	Knee and hip osteoarthritis || id:ieu-a-1170	BAFF-R on IgD+ CD24+ B cell || id:ebi-a-GCST90001703	Wald ratio	1	0.0342302609284988	0.114174178244663	0.764324	-0.189551	0.258011650288038	1.03482285856927	0.827330415709962	1.29435389813213	1
ebi-a-GCST90001703	ieu-a-1171	Knee osteoarthritis || id:ieu-a-1171	BAFF-R on IgD+ CD24+ B cell || id:ebi-a-GCST90001703	Wald ratio	1	0.0516082683835988	0.146185699762792	0.724064	-0.234916	0.338132239918672	1.0529631827427	0.790637495068857	1.40232593461189	1
ebi-a-GCST90001703	ukb-saige-740.1	Osteoarthritis; localized || id:ukb-saige-740.1	BAFF-R on IgD+ CD24+ B cell || id:ebi-a-GCST90001703	Inverse variance weighted	8	0.000865614511806995	0.0185733696180609	0.962828	-0.0355382	0.0372694189632064	1.00086598926417	0.965085876954874	1.03797263268063	1
ebi-a-GCST90001703	ukb-saige-740.1	Osteoarthritis; localized || id:ukb-saige-740.1	BAFF-R on IgD+ CD24+ B cell || id:ebi-a-GCST90001703	Bayesian Weighted Mendelian Randomization	8	0.00162213967446483	0.018437300507431	0.929891	-0.034515	0.0377592486690295	1.00162345605471	0.96607387810913	1.0384811870523	1
ebi-a-GCST90001703	ukb-saige-740.1	Osteoarthritis; localized || id:ukb-saige-740.1	BAFF-R on IgD+ CD24+ B cell || id:ebi-a-GCST90001703	MR Egger	8	0.010147628297025	0.0333358069607116	0.7711	-0.0551906	0.0754858099400198	1.01019929007736	0.94630480922425	1.07840792493634	0.998524067790455
ebi-a-GCST90001703	ukb-saige-740.1	Osteoarthritis; localized || id:ukb-saige-740.1	BAFF-R on IgD+ CD24+ B cell || id:ebi-a-GCST90001703	Weighted median	8	0.00272439822579836	0.0138983276179359	0.844592	-0.0245163	0.0299651203569526	1.00272811277118	0.975781760219297	1.03041859269401	0.974299104969666
ebi-a-GCST90001703	ukb-saige-740.1	Osteoarthritis; localized || id:ukb-saige-740.1	BAFF-R on IgD+ CD24+ B cell || id:ebi-a-GCST90001703	Weighted mode	8	0.00392956418797941	0.0147648436737837	0.797798	-0.0250095	0.0328686577885954	1.00393729504832	0.975300617942016	1.03341479934227	0.97480223228745
ebi-a-GCST90001704	ieu-a-1169	Hip osteoarthritis || id:ieu-a-1169	BAFF-R on IgD+ CD24- B cell || id:ebi-a-GCST90001704	Inverse variance weighted	2	0.0503043788913799	0.105436162899245	0.633286	-0.156351	0.2569592581739	1.05159112981012	0.855259369086958	1.29299244681281	1
ebi-a-GCST90001704	ieu-a-1169	Hip osteoarthritis || id:ieu-a-1169	BAFF-R on IgD+ CD24- B cell || id:ebi-a-GCST90001704	Bayesian Weighted Mendelian Randomization	2	0.0509217082218299	0.107587398292197	0.635995	-0.15995	0.261793008874536	1.05224050827776	0.852186744545791	1.29925757980519	1
ebi-a-GCST90001704	ieu-a-1170	Knee and hip osteoarthritis || id:ieu-a-1170	BAFF-R on IgD+ CD24- B cell || id:ebi-a-GCST90001704	Inverse variance weighted	2	0.0351511729724289	0.0968349128209768	0.716604	-0.154645	0.224947602101543	1.03577627834355	0.85671903938853	1.25225709883247	1
ebi-a-GCST90001704	ieu-a-1170	Knee and hip osteoarthritis || id:ieu-a-1170	BAFF-R on IgD+ CD24- B cell || id:ebi-a-GCST90001704	Bayesian Weighted Mendelian Randomization	2	0.043458695831085	0.0996793693328861	0.662848	-0.151913	0.238830259723542	1.04441685465093	0.859063129316087	1.26976298837007	1
ebi-a-GCST90001704	ieu-a-1171	Knee osteoarthritis || id:ieu-a-1171	BAFF-R on IgD+ CD24- B cell || id:ebi-a-GCST90001704	Inverse variance weighted	2	0.0327419357145885	0.173717732114359	0.850502	-0.307745	0.373228690658731	1.03328385117277	0.735102878195989	1.45241645593146	1
ebi-a-GCST90001704	ieu-a-1171	Knee osteoarthritis || id:ieu-a-1171	BAFF-R on IgD+ CD24- B cell || id:ebi-a-GCST90001704	Bayesian Weighted Mendelian Randomization	2	0.0409781018852455	0.177215390630044	0.817134	-0.306364	0.388320267520131	1.04182929119831	0.736118576577545	1.47450194375639	1
ebi-a-GCST90001704	ukb-saige-740.1	Osteoarthritis; localized || id:ukb-saige-740.1	BAFF-R on IgD+ CD24- B cell || id:ebi-a-GCST90001704	Inverse variance weighted	10	0.00135370738686583	0.012052327694417	0.91057	-0.0222689	0.0249762696679232	1.0013546240623	0.9779772657282	1.02529078974483	1
ebi-a-GCST90001704	ukb-saige-740.1	Osteoarthritis; localized || id:ukb-saige-740.1	BAFF-R on IgD+ CD24- B cell || id:ebi-a-GCST90001704	Bayesian Weighted Mendelian Randomization	10	0.00132821704348263	0.0125967420012526	0.916026	-0.0233614	0.0260178313659378	1.0013290995144	0.976909367582258	1.02635924969764	1
ebi-a-GCST90001704	ukb-saige-740.1	Osteoarthritis; localized || id:ukb-saige-740.1	BAFF-R on IgD+ CD24- B cell || id:ebi-a-GCST90001704	MR Egger	10	0.00462844429823697	0.0186185779304673	0.809939	-0.031864	0.0411208570419528	1.00463917209116	0.968638338496434	1.04197802831828	0.998524067790455
ebi-a-GCST90001704	ukb-saige-740.1	Osteoarthritis; localized || id:ukb-saige-740.1	BAFF-R on IgD+ CD24- B cell || id:ebi-a-GCST90001704	Weighted median	10	0.00496968829281583	0.0132621901605987	0.707864	-0.0210242	0.0309635810075893	1.00498205767585	0.97919526342729	1.03144793890783	0.974299104969666
ebi-a-GCST90001704	ukb-saige-740.1	Osteoarthritis; localized || id:ukb-saige-740.1	BAFF-R on IgD+ CD24- B cell || id:ebi-a-GCST90001704	Weighted mode	10	0.00686513448088494	0.0139671579524648	0.634823	-0.0205105	0.034240764067716	1.00689	0.979698414381908	1.03483372751489	0.974498079964075
ebi-a-GCST90001705	ieu-a-1169	Hip osteoarthritis || id:ieu-a-1169	BAFF-R on IgD+ CD38- B cell || id:ebi-a-GCST90001705	Wald ratio	1	0.0958837209302326	0.148439012814428	0.518314	-0.195057	0.386824186046512	1.10063107619527	0.822787968297795	1.4722976180521	1
ebi-a-GCST90001705	ieu-a-1170	Knee and hip osteoarthritis || id:ieu-a-1170	BAFF-R on IgD+ CD38- B cell || id:ebi-a-GCST90001705	Wald ratio	1	0.144561936402468	0.124928808732795	0.247209	-0.100299	0.389422401518747	1.15553326232062	0.904567338400614	1.47613	1
ebi-a-GCST90001705	ieu-a-1171	Knee osteoarthritis || id:ieu-a-1171	BAFF-R on IgD+ CD38- B cell || id:ebi-a-GCST90001705	Wald ratio	1	0.19374466065496	0.151539629805411	0.20107	-0.103273	0.490762335073564	1.21378631598159	0.901880714018842	1.63356106629572	1
ebi-a-GCST90001706	ieu-a-1169	Hip osteoarthritis || id:ieu-a-1169	BAFF-R on IgD+ CD38- naive B cell || id:ebi-a-GCST90001706	Inverse variance weighted	2	0.0131118161860901	0.0889318047214617	0.882787	-0.161195	0.187418153440155	1.01319815297933	0.851126492969061	1.20613152766476	1
ebi-a-GCST90001706	ieu-a-1169	Hip osteoarthritis || id:ieu-a-1169	BAFF-R on IgD+ CD38- naive B cell || id:ebi-a-GCST90001706	Bayesian Weighted Mendelian Randomization	2	0.013407366514577	0.0904560548479514	0.882169	-0.163887	0.190701234016562	1.01349764828205	0.848838358728601	1.21009786199079	1
ebi-a-GCST90001706	ieu-a-1170	Knee and hip osteoarthritis || id:ieu-a-1170	BAFF-R on IgD+ CD38- naive B cell || id:ebi-a-GCST90001706	Inverse variance weighted	2	0.0759282973235288	0.0696874990166712	0.27591	-0.0606592	0.212515795396204	1.07888521242646	0.941143926273066	1.23678564893034	1
ebi-a-GCST90001706	ieu-a-1170	Knee and hip osteoarthritis || id:ieu-a-1170	BAFF-R on IgD+ CD38- naive B cell || id:ebi-a-GCST90001706	Bayesian Weighted Mendelian Randomization	2	0.0767871278481624	0.0711102026175271	0.280217	-0.0625889	0.216163124978515	1.0798121899808	0.939329581558417	1.2413048503132	1
ebi-a-GCST90001706	ieu-a-1171	Knee osteoarthritis || id:ieu-a-1171	BAFF-R on IgD+ CD38- naive B cell || id:ebi-a-GCST90001706	Inverse variance weighted	2	0.163824882799135	0.0889775176750713	0.0655931	-0.0105711	0.338220817442274	1.17800800756437	0.989484625362954	1.40245015467193	1
ebi-a-GCST90001706	ieu-a-1171	Knee osteoarthritis || id:ieu-a-1171	BAFF-R on IgD+ CD38- naive B cell || id:ebi-a-GCST90001706	Bayesian Weighted Mendelian Randomization	2	0.164822338112657	0.0914452856552844	0.0714802	-0.0144104	0.344055097997015	1.17918360411593	0.985692911402424	1.41065635770628	1
ebi-a-GCST90001707	ieu-a-1169	Hip osteoarthritis || id:ieu-a-1169	BAFF-R on IgD+ CD38- unswitched memory B cell || id:ebi-a-GCST90001707	Wald ratio	1	0.0325430090206186	0.141084085051546	0.817576	-0.243982	0.30906781572165	1.03307832387544	0.783501895684969	1.36215474287812	1
ebi-a-GCST90001707	ieu-a-1170	Knee and hip osteoarthritis || id:ieu-a-1170	BAFF-R on IgD+ CD38- unswitched memory B cell || id:ebi-a-GCST90001707	Wald ratio	1	0.0325430090206186	0.108546391752577	0.764324	-0.180208	0.24529393685567	1.03307832387544	0.835096561072396	1.27799690839436	1
ebi-a-GCST90001707	ieu-a-1171	Knee osteoarthritis || id:ieu-a-1171	BAFF-R on IgD+ CD38- unswitched memory B cell || id:ebi-a-GCST90001707	Wald ratio	1	0.0490644329896907	0.138980025773196	0.724064	-0.223336	0.321465283505155	1.05028802175716	0.799845721908743	1.37914712604092	1
ebi-a-GCST90001708	ieu-a-1169	Hip osteoarthritis || id:ieu-a-1169	BAFF-R on IgD+ CD38+ B cell || id:ebi-a-GCST90001708	Wald ratio	1	0.0899496883348175	0.139252448797863	0.518314	-0.182985	0.362884487978629	1.0941192353598	0.832780554657143	1.43746980460795	1
ebi-a-GCST90001708	ieu-a-1170	Knee and hip osteoarthritis || id:ieu-a-1170	BAFF-R on IgD+ CD38+ B cell || id:ebi-a-GCST90001708	Wald ratio	1	0.135615316117542	0.117197239536955	0.247209	-0.0940913	0.365321905609973	1.14524125299507	0.910199681452544	1.44097779233305	1
ebi-a-GCST90001708	ieu-a-1171	Knee osteoarthritis || id:ieu-a-1171	BAFF-R on IgD+ CD38+ B cell || id:ebi-a-GCST90001708	Wald ratio	1	0.181754229741763	0.142161175422974	0.20107	-0.0968817	0.460390133570793	1.19931940061685	0.907663399879662	1.58469210600169	1
ebi-a-GCST90001708	ukb-saige-740.1	Osteoarthritis; localized || id:ukb-saige-740.1	BAFF-R on IgD+ CD38+ B cell || id:ebi-a-GCST90001708	Inverse variance weighted	10	0.0010993376045716	0.0125721094775241	0.93032	-0.023542	0.0257406721805189	1.00109994209765	0.976732953981567	1.02607482422143	1
ebi-a-GCST90001708	ukb-saige-740.1	Osteoarthritis; localized || id:ukb-saige-740.1	BAFF-R on IgD+ CD38+ B cell || id:ebi-a-GCST90001708	Bayesian Weighted Mendelian Randomization	10	0.00120195514404186	0.013127211053425	0.927046	-0.0245274	0.0269312888087548	1.00120267778162	0.975770973386928	1.02729721352308	1
ebi-a-GCST90001708	ukb-saige-740.1	Osteoarthritis; localized || id:ukb-saige-740.1	BAFF-R on IgD+ CD38+ B cell || id:ebi-a-GCST90001708	MR Egger	10	0.00394871685125725	0.0193519132377813	0.843411	-0.033981	0.0418784667973087	1.00395652330542	0.96658983768147	1.04276774014632	0.998524067790455
ebi-a-GCST90001708	ukb-saige-740.1	Osteoarthritis; localized || id:ukb-saige-740.1	BAFF-R on IgD+ CD38+ B cell || id:ebi-a-GCST90001708	Weighted median	10	0.00544222102871559	0.0136141661723375	0.689343	-0.0212415	0.0321259867264971	1.00545705681458	0.978982468012111	1.0326475970004	0.974299104969666
ebi-a-GCST90001708	ukb-saige-740.1	Osteoarthritis; localized || id:ukb-saige-740.1	BAFF-R on IgD+ CD38+ B cell || id:ebi-a-GCST90001708	Weighted mode	10	0.00642148081343169	0.0140187495597378	0.657766	-0.0210553	0.0338982299505178	1.00644214272436	0.979164846274325	1.03447932235899	0.974498079964075
ebi-a-GCST90001709	ieu-a-1169	Hip osteoarthritis || id:ieu-a-1169	BAFF-R on IgD+ CD38dim B cell || id:ebi-a-GCST90001709	Inverse variance weighted	2	0.0513450765746786	0.10669178264913	0.630341	-0.157771	0.260460970566973	1.05268608792405	0.854045491892278	1.29752807107916	1
ebi-a-GCST90001709	ieu-a-1169	Hip osteoarthritis || id:ieu-a-1169	BAFF-R on IgD+ CD38dim B cell || id:ebi-a-GCST90001709	Bayesian Weighted Mendelian Randomization	2	0.051985011146378	0.108916538366744	0.633154	-0.161491	0.265461426345197	1.05335995373688	0.850873845500893	1.30403255195061	1
ebi-a-GCST90001709	ieu-a-1170	Knee and hip osteoarthritis || id:ieu-a-1170	BAFF-R on IgD+ CD38dim B cell || id:ebi-a-GCST90001709	Inverse variance weighted	2	0.036564088896072	0.0977937560755745	0.708486	-0.155112	0.228239850804198	1.03724077750401	0.856319544361094	1.25638663464097	1
ebi-a-GCST90001709	ieu-a-1170	Knee and hip osteoarthritis || id:ieu-a-1170	BAFF-R on IgD+ CD38dim B cell || id:ebi-a-GCST90001709	Bayesian Weighted Mendelian Randomization	2	0.0448373131214686	0.100576150347314	0.655738	-0.152292	0.241966567802204	1.0458576987432	0.858737542965222	1.27375160778865	1
ebi-a-GCST90001709	ieu-a-1171	Knee osteoarthritis || id:ieu-a-1171	BAFF-R on IgD+ CD38dim B cell || id:ebi-a-GCST90001709	Inverse variance weighted	2	0.0347934215362896	0.175410118672068	0.842768	-0.30901	0.378597254133543	1.03540579416703	0.734173126465297	1.4602348137641	1
ebi-a-GCST90001709	ieu-a-1171	Knee osteoarthritis || id:ieu-a-1171	BAFF-R on IgD+ CD38dim B cell || id:ebi-a-GCST90001709	Bayesian Weighted Mendelian Randomization	2	0.0431196099896099	0.178900014108699	0.809535	-0.307524	0.393763637642659	1.04406276771924	0.735264913877402	1.48255008822483	1
ebi-a-GCST90001709	ukb-saige-740.1	Osteoarthritis; localized || id:ukb-saige-740.1	BAFF-R on IgD+ CD38dim B cell || id:ebi-a-GCST90001709	Inverse variance weighted	10	0.00107841003275505	0.0119169806184267	0.927895	-0.0222789	0.0244356920448713	1.00107899172594	0.977967469295701	1.02473669026715	1
ebi-a-GCST90001709	ukb-saige-740.1	Osteoarthritis; localized || id:ukb-saige-740.1	BAFF-R on IgD+ CD38dim B cell || id:ebi-a-GCST90001709	Bayesian Weighted Mendelian Randomization	10	0.00109629260979897	0.0125455315393377	0.930365	-0.0234929	0.0256855344269008	1.0010968937582	0.976780861723931	1.02601825032027	1
ebi-a-GCST90001709	ukb-saige-740.1	Osteoarthritis; localized || id:ukb-saige-740.1	BAFF-R on IgD+ CD38dim B cell || id:ebi-a-GCST90001709	MR Egger	10	0.00498943430482278	0.0182592691541971	0.791579	-0.0307987	0.0407776018470491	1.00500190225955	0.969670715923261	1.04162042532514	0.998524067790455
ebi-a-GCST90001709	ukb-saige-740.1	Osteoarthritis; localized || id:ukb-saige-740.1	BAFF-R on IgD+ CD38dim B cell || id:ebi-a-GCST90001709	Weighted median	10	0.00525489127506159	0.013052195691825	0.687238	-0.0203274	0.0308371948310386	1.00526872243268	0.979877796755706	1.03131758638407	0.974299104969666
ebi-a-GCST90001709	ukb-saige-740.1	Osteoarthritis; localized || id:ukb-saige-740.1	BAFF-R on IgD+ CD38dim B cell || id:ebi-a-GCST90001709	Weighted mode	10	0.00681825046476631	0.013459870404219	0.624639	-0.0195631	0.0331995964570355	1.00684154765306	0.980627020057551	1.03375685285615	0.974498079964075
ebi-a-GCST90001710	ieu-a-1169	Hip osteoarthritis || id:ieu-a-1169	BAFF-R on IgD- CD24- B cell || id:ebi-a-GCST90001710	Wald ratio	1	0.0336487341772152	0.145877748167888	0.817576	-0.252272	0.319569120586276	1.03422125633502	0.777033626476925	1.37653451615063	1
ebi-a-GCST90001710	ieu-a-1170	Knee and hip osteoarthritis || id:ieu-a-1170	BAFF-R on IgD- CD24- B cell || id:ebi-a-GCST90001710	Wald ratio	1	0.0336487341772152	0.112234510326449	0.764324	-0.186331	0.253628374417055	1.03422125633502	0.829998897867693	1.28869280405441	1
ebi-a-GCST90001710	ieu-a-1171	Knee osteoarthritis || id:ieu-a-1171	BAFF-R on IgD- CD24- B cell || id:ebi-a-GCST90001710	Wald ratio	1	0.0507315123251166	0.14370219853431	0.724064	-0.230925	0.332387821452365	1.05204039548165	0.793799160025924	1.39429348059405	1
ebi-a-GCST90001710	ukb-saige-740.1	Osteoarthritis; localized || id:ukb-saige-740.1	BAFF-R on IgD- CD24- B cell || id:ebi-a-GCST90001710	Inverse variance weighted	9	0.000868130467659623	0.0154893193294803	0.955304	-0.0294909	0.0312271963534411	1.00086850740198	0.970939678763522	1.03171988025535	1
ebi-a-GCST90001710	ukb-saige-740.1	Osteoarthritis; localized || id:ukb-saige-740.1	BAFF-R on IgD- CD24- B cell || id:ebi-a-GCST90001710	Bayesian Weighted Mendelian Randomization	9	0.00469987116884101	0.0160005788066699	0.768963	-0.0266613	0.036061005629914	1.0047109328861	0.973691010556045	1.03671909026294	1
ebi-a-GCST90001710	ukb-saige-740.1	Osteoarthritis; localized || id:ukb-saige-740.1	BAFF-R on IgD- CD24- B cell || id:ebi-a-GCST90001710	MR Egger	9	0.00500340940045534	0.0236218530974662	0.838288	-0.0412954	0.0513022414714891	1.00501594735539	0.959545616543136	1.05264099697259	0.998524067790455
ebi-a-GCST90001710	ukb-saige-740.1	Osteoarthritis; localized || id:ukb-saige-740.1	BAFF-R on IgD- CD24- B cell || id:ebi-a-GCST90001710	Weighted median	9	0.00432165943352808	0.0136841796846531	0.752143	-0.0224993	0.0311426516154482	1.00433101127062	0.977751889599639	1.03163265745556	0.974299104969666
ebi-a-GCST90001710	ukb-saige-740.1	Osteoarthritis; localized || id:ukb-saige-740.1	BAFF-R on IgD- CD24- B cell || id:ebi-a-GCST90001710	Weighted mode	9	0.00578491959024111	0.015678610311183	0.721725	-0.0249452	0.0365149958001597	1.00580168454996	0.975363402787564	1.03718985739296	0.974498079964075
ebi-a-GCST90001711	ieu-a-1169	Hip osteoarthritis || id:ieu-a-1169	BAFF-R on IgD- CD27- B cell || id:ebi-a-GCST90001711	Wald ratio	1	0.0349588164042222	0.151557362865548	0.817576	-0.262094	0.332011247620696	1.0355770591344	0.769438989449356	1.39376852500406	1
ebi-a-GCST90001711	ieu-a-1170	Knee and hip osteoarthritis || id:ieu-a-1170	BAFF-R on IgD- CD27- B cell || id:ebi-a-GCST90001711	Wald ratio	1	0.0349588164042222	0.116604256791833	0.764324	-0.193586	0.263503159716214	1.0355770591344	0.823999359064123	1.30148140724705	1
ebi-a-GCST90001711	ieu-a-1171	Knee osteoarthritis || id:ieu-a-1171	BAFF-R on IgD- CD27- B cell || id:ebi-a-GCST90001711	Wald ratio	1	0.0527066966603219	0.149297110226683	0.724064	-0.239916	0.34532903270462	1.05412042273318	0.786694224276676	1.41245	1
ebi-a-GCST90001711	ukb-saige-740.1	Osteoarthritis; localized || id:ukb-saige-740.1	BAFF-R on IgD- CD27- B cell || id:ebi-a-GCST90001711	Inverse variance weighted	9	0.000914725479741887	0.0154333937968878	0.952738	-0.0293347	0.0311641773216419	1.00091514396868	0.971091360180836	1.03165486431605	1
ebi-a-GCST90001711	ukb-saige-740.1	Osteoarthritis; localized || id:ukb-saige-740.1	BAFF-R on IgD- CD27- B cell || id:ebi-a-GCST90001711	Bayesian Weighted Mendelian Randomization	9	0.00472536344707819	0.0159725963549648	0.767351	-0.0265809	0.0360316523028091	1.00473654558321	0.973769237973363	1.03668865955499	1
ebi-a-GCST90001711	ukb-saige-740.1	Osteoarthritis; localized || id:ukb-saige-740.1	BAFF-R on IgD- CD27- B cell || id:ebi-a-GCST90001711	MR Egger	9	0.00508673845534036	0.0235326795464045	0.83503	-0.0410373	0.0512107903662931	1.0050996978738	0.959793316074337	1.05254473619169	0.998524067790455
ebi-a-GCST90001711	ukb-saige-740.1	Osteoarthritis; localized || id:ukb-saige-740.1	BAFF-R on IgD- CD27- B cell || id:ebi-a-GCST90001711	Weighted median	9	0.0042993129064808	0.0148471255356898	0.772144	-0.0248011	0.0333996789564328	1.00430856821128	0.975503966172063	1.03396371020462	0.974299104969666
ebi-a-GCST90001711	ukb-saige-740.1	Osteoarthritis; localized || id:ukb-saige-740.1	BAFF-R on IgD- CD27- B cell || id:ebi-a-GCST90001711	Weighted mode	9	0.00482855799189333	0.0144086159566357	0.746156	-0.0234123	0.0330694452668994	1.00484023426365	0.976859612897367	1.03362231692664	0.974498079964075
ebi-a-GCST90001712	ieu-a-1169	Hip osteoarthritis || id:ieu-a-1169	BAFF-R on IgD- CD38- B cell || id:ebi-a-GCST90001712	Wald ratio	1	0.0303891395908544	0.131746389891697	0.817576	-0.227834	0.28861206377858	1.03085560264004	0.796256598948338	1.33457389853709	1
ebi-a-GCST90001712	ieu-a-1170	Knee and hip osteoarthritis || id:ieu-a-1170	BAFF-R on IgD- CD38- B cell || id:ebi-a-GCST90001712	Wald ratio	1	0.0303891395908544	0.101362214199759	0.764324	-0.168281	0.229059079422383	1.03085560264004	0.845116492448863	1.25741632424558	1
ebi-a-GCST90001712	ieu-a-1171	Knee osteoarthritis || id:ieu-a-1171	BAFF-R on IgD- CD38- B cell || id:ebi-a-GCST90001712	Wald ratio	1	0.0458170878459687	0.129781588447653	0.724064	-0.208555	0.300189001203369	1.04688290583584	0.811756528515684	1.35011395662599	1
ebi-a-GCST90001712	ukb-saige-740.1	Osteoarthritis; localized || id:ukb-saige-740.1	BAFF-R on IgD- CD38- B cell || id:ebi-a-GCST90001712	Inverse variance weighted	8	0.00461917068538887	0.0176006677322732	0.79298	-0.0298781	0.0391164794406442	1.00462985549962	0.970563801120327	1.03989160258829	1
ebi-a-GCST90001712	ukb-saige-740.1	Osteoarthritis; localized || id:ukb-saige-740.1	BAFF-R on IgD- CD38- B cell || id:ebi-a-GCST90001712	Bayesian Weighted Mendelian Randomization	8	0.00810132677199815	0.0176359952196632	0.645973	-0.0264652	0.0426678774025381	1.00813423131653	0.973881911101749	1.04359123705502	1
ebi-a-GCST90001712	ukb-saige-740.1	Osteoarthritis; localized || id:ukb-saige-740.1	BAFF-R on IgD- CD38- B cell || id:ebi-a-GCST90001712	MR Egger	8	0.0133329257685039	0.0324848377675701	0.695741	-0.0503374	0.0770032077929413	1.01342220556901	0.950908575426795	1.08004554094951	0.998524067790455
ebi-a-GCST90001712	ukb-saige-740.1	Osteoarthritis; localized || id:ukb-saige-740.1	BAFF-R on IgD- CD38- B cell || id:ebi-a-GCST90001712	Weighted median	8	0.00625005848040314	0.0138093065521046	0.650839	-0.0208162	0.0333162993225282	1.00626963085081	0.979398978831275	1.03387750228303	0.974299104969666
ebi-a-GCST90001712	ukb-saige-740.1	Osteoarthritis; localized || id:ukb-saige-740.1	BAFF-R on IgD- CD38- B cell || id:ebi-a-GCST90001712	Weighted mode	8	0.00611661732006846	0.01474875147028	0.690761	-0.0227909	0.0350241702018173	1.00613536202236	0.977466815964091	1.0356447402395	0.974498079964075
ebi-a-GCST90001713	ieu-a-1169	Hip osteoarthritis || id:ieu-a-1169	BAFF-R on IgD- CD38+ B cell || id:ebi-a-GCST90001713	Wald ratio	1	-0.207629	0.196396046353102	0.290422	-0.592565	0.177307075664622	0.812508279084695	0.552907021652715	1.19399768447113	1
ebi-a-GCST90001713	ieu-a-1170	Knee and hip osteoarthritis || id:ieu-a-1170	BAFF-R on IgD- CD38+ B cell || id:ebi-a-GCST90001713	Wald ratio	1	-0.137714	0.158998636673483	0.386416	-0.449352	0.173922944785276	0.8713475277925	0.638041652974354	1.1899638693661	1
ebi-a-GCST90001713	ieu-a-1171	Knee osteoarthritis || id:ieu-a-1171	BAFF-R on IgD- CD38+ B cell || id:ebi-a-GCST90001713	Wald ratio	1	-0.0685092	0.194398091342877	0.724526	-0.449529	0.31251105657805	0.933784866951711	0.637928250823285	1.36685305380772	1
ebi-a-GCST90001713	ukb-saige-740.1	Osteoarthritis; localized || id:ukb-saige-740.1	BAFF-R on IgD- CD38+ B cell || id:ebi-a-GCST90001713	Inverse variance weighted	3	0.018265333633835	0.0334109553622718	0.584594	-0.0472201	0.0837508061438878	1.01843316511565	0.95387738897923	1.08735789713751	1
ebi-a-GCST90001713	ukb-saige-740.1	Osteoarthritis; localized || id:ukb-saige-740.1	BAFF-R on IgD- CD38+ B cell || id:ebi-a-GCST90001713	Bayesian Weighted Mendelian Randomization	3	0.0183311683736029	0.033775577257912	0.587313	-0.047869	0.0845312997991105	1.01850021560515	0.953258691003426	1.08820690435646	1
ebi-a-GCST90001713	ukb-saige-740.1	Osteoarthritis; localized || id:ukb-saige-740.1	BAFF-R on IgD- CD38+ B cell || id:ebi-a-GCST90001713	MR Egger	3	0.00663248714605997	0.0614041172002388	0.931502	-0.11372	0.126984556858528	1.00665453079673	0.892508195652656	1.13539948351124	0.998524067790455
ebi-a-GCST90001713	ukb-saige-740.1	Osteoarthritis; localized || id:ukb-saige-740.1	BAFF-R on IgD- CD38+ B cell || id:ebi-a-GCST90001713	Weighted median	3	0.0180714498186518	0.0350716976150252	0.606363	-0.0506691	0.0868119771441012	1.01823572654878	0.950593191157421	1.09069158549087	0.974299104969666
ebi-a-GCST90001713	ukb-saige-740.1	Osteoarthritis; localized || id:ukb-saige-740.1	BAFF-R on IgD- CD38+ B cell || id:ebi-a-GCST90001713	Weighted mode	3	0.0127448455793507	0.0360151597561173	0.757257	-0.0578449	0.0833345587013405	1.01282640725243	0.943796349527597	1.08690538137949	0.974498079964075
ebi-a-GCST90001714	ukb-saige-740.1	Osteoarthritis; localized || id:ukb-saige-740.1	BAFF-R on IgD- CD38dim B cell || id:ebi-a-GCST90001714	Wald ratio	1	0.0632547441058079	0.0632547441058079	0.317311	-0.0607246	0.187234042553192	1.06529818310129	0.941082421146304	1.20590948616016	1
ebi-a-GCST90001715	ieu-a-1169	Hip osteoarthritis || id:ieu-a-1169	BAFF-R on memory B cell || id:ebi-a-GCST90001715	Wald ratio	1	0.0335816156914894	0.145586768617021	0.817576	-0.251768	0.318931682180851	1.03415184329986	0.777424729305514	1.3756573397863	1
ebi-a-GCST90001715	ieu-a-1170	Knee and hip osteoarthritis || id:ieu-a-1170	BAFF-R on memory B cell || id:ebi-a-GCST90001715	Wald ratio	1	0.0335816156914894	0.112010638297872	0.764324	-0.185959	0.253122466755319	1.03415184329986	0.830307441465753	1.28804100937907	1
ebi-a-GCST90001715	ieu-a-1171	Knee osteoarthritis || id:ieu-a-1171	BAFF-R on memory B cell || id:ebi-a-GCST90001715	Wald ratio	1	0.0506303191489362	0.143415558510638	0.724064	-0.230464	0.331724813829787	1.05193394155885	0.794164885027203	1.39336935977173	1
ebi-a-GCST90001716	ieu-a-1169	Hip osteoarthritis || id:ieu-a-1169	BAFF-R on naive-mature B cell || id:ebi-a-GCST90001716	Inverse variance weighted	2	0.0488151537374881	0.104582214314863	0.640669	-0.156166	0.25379629379462	1.05002623937431	0.855417191035071	1.28890921871753	1
ebi-a-GCST90001716	ieu-a-1169	Hip osteoarthritis || id:ieu-a-1169	BAFF-R on naive-mature B cell || id:ebi-a-GCST90001716	Bayesian Weighted Mendelian Randomization	2	0.0494233382884268	0.106709465742301	0.643251	-0.159727	0.258573891143336	1.05066504334684	0.852376273086803	1.29508184139542	1
ebi-a-GCST90001716	ieu-a-1170	Knee and hip osteoarthritis || id:ieu-a-1170	BAFF-R on naive-mature B cell || id:ebi-a-GCST90001716	Inverse variance weighted	2	0.0324856174038189	0.0964743026312	0.736322	-0.156604	0.221575250560971	1.03301903554149	0.855042575179689	1.24804116048469	1
ebi-a-GCST90001716	ieu-a-1170	Knee and hip osteoarthritis || id:ieu-a-1170	BAFF-R on naive-mature B cell || id:ebi-a-GCST90001716	Bayesian Weighted Mendelian Randomization	2	0.0410620595133051	0.0996389004792043	0.68026	-0.15423	0.236354304452546	1.04191676438641	0.857074712195837	1.26662300084453	1
ebi-a-GCST90001716	ieu-a-1171	Knee osteoarthritis || id:ieu-a-1171	BAFF-R on naive-mature B cell || id:ebi-a-GCST90001716	Inverse variance weighted	2	0.0284585048597853	0.173152075351217	0.869451	-0.31092	0.36783657254817	1.02886731695516	0.732772815671397	1.44460593141491	1
ebi-a-GCST90001716	ieu-a-1171	Knee osteoarthritis || id:ieu-a-1171	BAFF-R on naive-mature B cell || id:ebi-a-GCST90001716	Bayesian Weighted Mendelian Randomization	2	0.0366857397957706	0.176944682286867	0.835753	-0.310126	0.38349731707803	1.03736696645314	0.733354666909695	1.46740761550333	1
ebi-a-GCST90001716	ukb-saige-740.1	Osteoarthritis; localized || id:ukb-saige-740.1	BAFF-R on naive-mature B cell || id:ebi-a-GCST90001716	Inverse variance weighted	10	0.00104242248487572	0.0119744033316149	0.930628	-0.0224274	0.024512253014841	1.00104296599603	0.977822216643298	1.02481514810549	1
ebi-a-GCST90001716	ukb-saige-740.1	Osteoarthritis; localized || id:ukb-saige-740.1	BAFF-R on naive-mature B cell || id:ebi-a-GCST90001716	Bayesian Weighted Mendelian Randomization	10	0.00103034653523988	0.0126190445129384	0.934925	-0.023703	0.0257636737805992	1.00103087752458	0.976575728514593	1.02609842585563	1
ebi-a-GCST90001716	ukb-saige-740.1	Osteoarthritis; localized || id:ukb-saige-740.1	BAFF-R on naive-mature B cell || id:ebi-a-GCST90001716	MR Egger	10	0.00520323833070036	0.0185057844749871	0.785717	-0.0310681	0.0414745759016752	1.00521679868431	0.969409554773959	1.0423466607906	0.998524067790455
ebi-a-GCST90001716	ukb-saige-740.1	Osteoarthritis; localized || id:ukb-saige-740.1	BAFF-R on naive-mature B cell || id:ebi-a-GCST90001716	Weighted median	10	0.00506171702711383	0.0131174116531209	0.699587	-0.0206484	0.0307718438672308	1.00507454915848	0.979563308878816	1.03125019098801	0.974299104969666
ebi-a-GCST90001716	ukb-saige-740.1	Osteoarthritis; localized || id:ukb-saige-740.1	BAFF-R on naive-mature B cell || id:ebi-a-GCST90001716	Weighted mode	10	0.00675835096718896	0.0139000343453552	0.638437	-0.0204857	0.0340024182840852	1.00678124015642	0.979722690390869	1.03458710865063	0.974498079964075
ebi-a-GCST90001717	ieu-a-1169	Hip osteoarthritis || id:ieu-a-1169	BAFF-R on unswitched memory B cell || id:ebi-a-GCST90001717	Wald ratio	1	0.0335648778866921	0.145514205017445	0.817576	-0.251643	0.318772719720884	1.03413453401304	0.777522292007486	1.37543867929136	1
ebi-a-GCST90001717	ieu-a-1170	Knee and hip osteoarthritis || id:ieu-a-1170	BAFF-R on unswitched memory B cell || id:ebi-a-GCST90001717	Wald ratio	1	0.0335648778866921	0.111954809769065	0.764324	-0.185867	0.252996305034059	1.03413453401304	0.830384403000567	1.28787851815858	1
ebi-a-GCST90001717	ieu-a-1171	Knee osteoarthritis || id:ieu-a-1171	BAFF-R on unswitched memory B cell || id:ebi-a-GCST90001717	Wald ratio	1	0.0506050839009802	0.143344077089217	0.724064	-0.230349	0.331559474995847	1.05190739607995	0.794256114667266	1.39313900075071	1
ebi-a-GCST90001718	ieu-a-1169	Hip osteoarthritis || id:ieu-a-1169	BAFF-R on switched memory B cell || id:ebi-a-GCST90001718	Wald ratio	1	0.0315864602876798	0.136937148217636	0.817576	-0.23681	0.299983270794246	1.03209060658888	0.78914093423242	1.34983622569916	1
ebi-a-GCST90001718	ieu-a-1170	Knee and hip osteoarthritis || id:ieu-a-1170	BAFF-R on switched memory B cell || id:ebi-a-GCST90001718	Wald ratio	1	0.0315864602876798	0.105355847404628	0.764324	-0.174911	0.238083921200751	1.03209060658888	0.839531735243788	1.26881566889151	1
ebi-a-GCST90001718	ieu-a-1171	Knee osteoarthritis || id:ieu-a-1171	BAFF-R on switched memory B cell || id:ebi-a-GCST90001718	Wald ratio	1	0.0476222639149469	0.134894934333959	0.724064	-0.216772	0.312016335209506	1.04877442054937	0.805113669342625	1.36617700963488	1
ebi-a-GCST90001718	ukb-saige-740.1	Osteoarthritis; localized || id:ukb-saige-740.1	BAFF-R on switched memory B cell || id:ebi-a-GCST90001718	Inverse variance weighted	10	0.00494979875999485	0.0154377917773928	0.748492	-0.0253083	0.0352078706436848	1.00496206925101	0.9750092965334	1.03583500611132	1
ebi-a-GCST90001718	ukb-saige-740.1	Osteoarthritis; localized || id:ukb-saige-740.1	BAFF-R on switched memory B cell || id:ebi-a-GCST90001718	Bayesian Weighted Mendelian Randomization	10	0.00664122399572196	0.0156119699961053	0.67055	-0.0239582	0.0372406851880884	1.00666332582444	0.976326483037422	1.03794280823691	1
ebi-a-GCST90001718	ukb-saige-740.1	Osteoarthritis; localized || id:ukb-saige-740.1	BAFF-R on switched memory B cell || id:ebi-a-GCST90001718	MR Egger	10	0.00163554832578925	0.0244511517719341	0.94831	-0.0462887	0.0495598057987801	1.00163688656444	0.954766272639231	1.05080843477344	0.998524067790455
ebi-a-GCST90001718	ukb-saige-740.1	Osteoarthritis; localized || id:ukb-saige-740.1	BAFF-R on switched memory B cell || id:ebi-a-GCST90001718	Weighted median	10	0.00549873840459975	0.0141316593599809	0.697196	-0.0221993	0.0331967907501624	1.00551388421484	0.978045277564271	1.03375395244152	0.974299104969666
ebi-a-GCST90001718	ukb-saige-740.1	Osteoarthritis; localized || id:ukb-saige-740.1	BAFF-R on switched memory B cell || id:ebi-a-GCST90001718	Weighted mode	10	0.00491946848098404	0.0142926644577113	0.738605	-0.0230942	0.0329330908180981	1.0049315889333	0.977170475073533	1.03348138753374	0.974498079964075
ebi-a-GCST90001719	ieu-a-1169	Hip osteoarthritis || id:ieu-a-1169	BAFF-R on IgD+ B cell || id:ebi-a-GCST90001719	Inverse variance weighted	2	0.0532261542385591	0.108728196134979	0.624464	-0.159881	0.266333418663118	1.05466813581969	0.852245106205458	1.30517015423638	1
ebi-a-GCST90001719	ieu-a-1169	Hip osteoarthritis || id:ieu-a-1169	BAFF-R on IgD+ B cell || id:ebi-a-GCST90001719	Bayesian Weighted Mendelian Randomization	2	0.0538994271029611	0.11106473196504	0.627465	-0.163787	0.271586301754439	1.05537845434875	0.848922443251457	1.3120440986782	1
ebi-a-GCST90001719	ieu-a-1170	Knee and hip osteoarthritis || id:ieu-a-1170	BAFF-R on IgD+ B cell || id:ebi-a-GCST90001719	Inverse variance weighted	2	0.0393319863200479	0.0992231119362221	0.69181	-0.155145	0.233809285715043	1.04011573053217	0.856290738202288	1.26340352013115	1
ebi-a-GCST90001719	ieu-a-1170	Knee and hip osteoarthritis || id:ieu-a-1170	BAFF-R on IgD+ B cell || id:ebi-a-GCST90001719	Bayesian Weighted Mendelian Randomization	2	0.0474603626899704	0.101874654465743	0.641308	-0.152214	0.247134685442826	1.04860463643046	0.858804511214929	1.28035154588083	1
ebi-a-GCST90001719	ieu-a-1171	Knee osteoarthritis || id:ieu-a-1171	BAFF-R on IgD+ B cell || id:ebi-a-GCST90001719	Inverse variance weighted	2	0.0388869893019391	0.177929454146157	0.826998	-0.309855	0.387628719428407	1.0396529851014	0.733553503862726	1.47348260725167	1
ebi-a-GCST90001719	ieu-a-1171	Knee osteoarthritis || id:ieu-a-1171	BAFF-R on IgD+ B cell || id:ebi-a-GCST90001719	Bayesian Weighted Mendelian Randomization	2	0.0473245768972431	0.181267768066453	0.794034	-0.30796	0.402609402307491	1.04846226048518	0.734944532566433	1.49572255177275	1
ebi-a-GCST90001719	ukb-saige-740.1	Osteoarthritis; localized || id:ukb-saige-740.1	BAFF-R on IgD+ B cell || id:ebi-a-GCST90001719	Inverse variance weighted	10	0.00104455427187602	0.0119765901037875	0.9305	-0.0224296	0.0245186708752995	1.00104510000869	0.977820110136407	1.02482172524721	1
ebi-a-GCST90001719	ukb-saige-740.1	Osteoarthritis; localized || id:ukb-saige-740.1	BAFF-R on IgD+ B cell || id:ebi-a-GCST90001719	Bayesian Weighted Mendelian Randomization	10	0.00110006107156458	0.0126029520661521	0.930444	-0.0236017	0.0258018471212226	1.00110066636068	0.976674617411311	1.02613759620798	1
ebi-a-GCST90001719	ukb-saige-740.1	Osteoarthritis; localized || id:ukb-saige-740.1	BAFF-R on IgD+ B cell || id:ebi-a-GCST90001719	MR Egger	10	0.00491187080530658	0.0182837520178863	0.794999	-0.0309243	0.0407480247603637	1.00492395381801	0.969548981491905	1.04158961768313	0.998524067790455
ebi-a-GCST90001719	ukb-saige-740.1	Osteoarthritis; localized || id:ukb-saige-740.1	BAFF-R on IgD+ B cell || id:ebi-a-GCST90001719	Weighted median	10	0.00519817946860994	0.0135407362624892	0.701059	-0.0213417	0.0317380225430887	1.00521171344402	0.978884458234664	1.03224704442374	0.974299104969666
ebi-a-GCST90001719	ukb-saige-740.1	Osteoarthritis; localized || id:ukb-saige-740.1	BAFF-R on IgD+ B cell || id:ebi-a-GCST90001719	Weighted mode	10	0.00720851303945225	0.0140742151983392	0.620857	-0.0203769	0.0347939748281972	1.00723455691116	0.979829258272436	1.03540636704884	0.974498079964075
ebi-a-GCST90001720	ieu-a-1169	Hip osteoarthritis || id:ieu-a-1169	BAFF-R on transitional B cell || id:ebi-a-GCST90001720	Wald ratio	1	0.0956114529105537	0.148017510648367	0.518314	-0.194503	0.385725773781354	1.10033145034288	0.823243817222597	1.4706813161359	1
ebi-a-GCST90001720	ieu-a-1170	Knee and hip osteoarthritis || id:ieu-a-1170	BAFF-R on transitional B cell || id:ebi-a-GCST90001720	Wald ratio	1	0.144151443445338	0.124574065309986	0.247209	-0.100014	0.388316611452911	1.15505902139765	0.904824999623723	1.47449655288802	1
ebi-a-GCST90001720	ieu-a-1171	Knee osteoarthritis || id:ieu-a-1171	BAFF-R on transitional B cell || id:ebi-a-GCST90001720	Wald ratio	1	0.193194510175106	0.151109323237104	0.20107	-0.10298	0.48936878371983	1.21311873450939	0.902145229676359	1.63128620049968	1
ebi-a-GCST90001720	ukb-saige-740.1	Osteoarthritis; localized || id:ukb-saige-740.1	BAFF-R on transitional B cell || id:ebi-a-GCST90001720	Inverse variance weighted	8	0.00102096219249069	0.0126468880517898	0.935658	-0.0237669	0.0258088627739987	1.0010214835518	0.976513270995069	1.02614479525831	1
ebi-a-GCST90001720	ukb-saige-740.1	Osteoarthritis; localized || id:ukb-saige-740.1	BAFF-R on transitional B cell || id:ebi-a-GCST90001720	Bayesian Weighted Mendelian Randomization	8	0.00235160733316171	0.0144924023036447	0.871097	-0.0260535	0.0307567158483054	1.00235437453038	0.974282962924241	1.03123459033361	1
ebi-a-GCST90001720	ukb-saige-740.1	Osteoarthritis; localized || id:ukb-saige-740.1	BAFF-R on transitional B cell || id:ebi-a-GCST90001720	MR Egger	8	0.0188385982450607	0.0206996510862929	0.397859	-0.0217327	0.0594099143741947	1.01901716418511	0.978501736116841	1.06121015689223	0.998524067790455
ebi-a-GCST90001720	ukb-saige-740.1	Osteoarthritis; localized || id:ukb-saige-740.1	BAFF-R on transitional B cell || id:ebi-a-GCST90001720	Weighted median	8	0.00545488764210171	0.0142869740250767	0.702603	-0.0225476	0.033457356731252	1.00546979263105	0.977704715481411	1.03402334865056	0.974299104969666
ebi-a-GCST90001720	ukb-saige-740.1	Osteoarthritis; localized || id:ukb-saige-740.1	BAFF-R on transitional B cell || id:ebi-a-GCST90001720	Weighted mode	8	0.00637027083092975	0.0153930028569778	0.691375	-0.0238	0.0365405564306062	1.0063906041595	0.976480972005477	1.03721636895843	0.974498079964075
ebi-a-GCST90001721	ukb-saige-740.1	Osteoarthritis; localized || id:ukb-saige-740.1	CD19 on CD20- B cell || id:ebi-a-GCST90001721	Wald ratio	1	0.0317145688800793	0.0356788899900892	0.374063	-0.0382161	0.101645193260654	1.03222283473332	0.962504963933014	1.10699063430393	1
ebi-a-GCST90001722	ukb-saige-740.1	Osteoarthritis; localized || id:ukb-saige-740.1	CD19 on CD20- CD38- B cell || id:ebi-a-GCST90001722	Wald ratio	1	-0.0431344	0.0862688713156003	0.617075	-0.212221	0.125952552120776	0.957782621274945	0.808785593652891	1.13422835027648	1
ebi-a-GCST90001723	ukb-saige-740.1	Osteoarthritis; localized || id:ukb-saige-740.1	CD19 on CD24+ CD27+ B cell || id:ebi-a-GCST90001723	Inverse variance weighted	2	0.0475067819892042	0.0605849852738664	0.432961	-0.0712398	0.166253353125982	1.04865331305262	0.931238564451328	1.18087224150145	1
ebi-a-GCST90001723	ukb-saige-740.1	Osteoarthritis; localized || id:ukb-saige-740.1	CD19 on CD24+ CD27+ B cell || id:ebi-a-GCST90001723	Bayesian Weighted Mendelian Randomization	2	0.0475068406940783	0.0626314475291847	0.448143	-0.0752508	0.17026447785128	1.04865337461368	0.927510840718063	1.18561837965938	1
ebi-a-GCST90001724	ukb-saige-740.1	Osteoarthritis; localized || id:ukb-saige-740.1	CD19 on IgD+ CD24+ B cell || id:ebi-a-GCST90001724	Inverse variance weighted	3	0.0312929620273056	0.0467857591449191	0.503587	-0.0604071	0.122993049951347	1.03178773423972	0.941381194892848	1.13087656127306	1
ebi-a-GCST90001724	ukb-saige-740.1	Osteoarthritis; localized || id:ukb-saige-740.1	CD19 on IgD+ CD24+ B cell || id:ebi-a-GCST90001724	Bayesian Weighted Mendelian Randomization	3	0.0316837120786679	0.0481963376259031	0.510931	-0.0627811	0.126148533825438	1.0321909841297	0.939149021833152	1.13445066006566	1
ebi-a-GCST90001724	ukb-saige-740.1	Osteoarthritis; localized || id:ukb-saige-740.1	CD19 on IgD+ CD24+ B cell || id:ebi-a-GCST90001724	MR Egger	3	0.0446491090609994	0.0829782148474247	0.685734	-0.117988	0.207286410161952	1.04566	0.888706546364055	1.23033490174137	0.998524067790455
ebi-a-GCST90001724	ukb-saige-740.1	Osteoarthritis; localized || id:ukb-saige-740.1	CD19 on IgD+ CD24+ B cell || id:ebi-a-GCST90001724	Weighted median	3	0.0154679042964752	0.0570465124036076	0.786279	-0.0963433	0.127279068607546	1.01558815151899	0.908152230212161	1.13573392124447	0.974299104969666
ebi-a-GCST90001724	ukb-saige-740.1	Osteoarthritis; localized || id:ukb-saige-740.1	CD19 on IgD+ CD24+ B cell || id:ebi-a-GCST90001724	Weighted mode	3	0.00877806137886062	0.0625956116049985	0.901323	-0.113909	0.131465460124658	1.00881670153879	0.892338854005224	1.14049851436554	0.991135485068117
ebi-a-GCST90001733	ieu-a-1169	Hip osteoarthritis || id:ieu-a-1169	CD19 on IgD- CD38- B cell || id:ebi-a-GCST90001733	Wald ratio	1	0.0700857740585774	0.19686889818689	0.721839	-0.315777	0.455948814504882	1.07260017857922	0.72922185429828	1.57766958890069	1
ebi-a-GCST90001733	ieu-a-1170	Knee and hip osteoarthritis || id:ieu-a-1170	CD19 on IgD- CD38- B cell || id:ebi-a-GCST90001733	Wald ratio	1	0.284672245467225	0.166033472803347	0.0864283	-0.0407534	0.610097852161785	1.32932626400498	0.960065890222308	1.84061149778402	1
ebi-a-GCST90001733	ieu-a-1171	Knee osteoarthritis || id:ieu-a-1171	CD19 on IgD- CD38- B cell || id:ebi-a-GCST90001733	Wald ratio	1	0.506071827057183	0.191470013947001	0.0082154	0.13079059972106	0.881353054393306	1.65876247449863	1.13972909673178	2.41416399273726	0.498525538404548
ebi-a-GCST90001733	ukb-saige-740.1	Osteoarthritis; localized || id:ukb-saige-740.1	CD19 on IgD- CD38- B cell || id:ebi-a-GCST90001733	Wald ratio	1	-0.00578801	0.0836820083682008	0.944857	-0.169805	0.158228730822873	0.994228712654861	0.843829565001316	1.17143410715386	1
ebi-a-GCST90001735	ukb-saige-740.1	Osteoarthritis; localized || id:ukb-saige-740.1	CD19 on IgD- CD38dim B cell || id:ebi-a-GCST90001735	Inverse variance weighted	3	0.0189358954061967	0.0460481325807522	0.680912	-0.0713184	0.109190235264471	1.01911631648588	0.931165320479027	1.11537451372593	1
ebi-a-GCST90001735	ukb-saige-740.1	Osteoarthritis; localized || id:ukb-saige-740.1	CD19 on IgD- CD38dim B cell || id:ebi-a-GCST90001735	Bayesian Weighted Mendelian Randomization	3	0.0188087421497532	0.047306249189807	0.690929	-0.0739115	0.111528990561775	1.01898674076571	0.928753879106988	1.11798615458241	1
ebi-a-GCST90001735	ukb-saige-740.1	Osteoarthritis; localized || id:ukb-saige-740.1	CD19 on IgD- CD38dim B cell || id:ebi-a-GCST90001735	MR Egger	3	0.0447664622684011	0.113556963933528	0.76094	-0.177805	0.267338111578116	1.04578360145802	0.837105486601426	1.30648210838837	0.998524067790455
ebi-a-GCST90001735	ukb-saige-740.1	Osteoarthritis; localized || id:ukb-saige-740.1	CD19 on IgD- CD38dim B cell || id:ebi-a-GCST90001735	Weighted median	3	0.00867929333524168	0.056064404551341	0.876972	-0.101207	0.11856552625587	1.00871706760722	0.903745992712497	1.12588064642826	0.974299104969666
ebi-a-GCST90001735	ukb-saige-740.1	Osteoarthritis; localized || id:ukb-saige-740.1	CD19 on IgD- CD38dim B cell || id:ebi-a-GCST90001735	Weighted mode	3	0.00167986871838674	0.063502815486206	0.981298	-0.122786	0.126145387071351	1.00168128048826	0.884453225115697	1.13444709023403	0.995327867031965
ebi-a-GCST90001736	ukb-saige-740.1	Osteoarthritis; localized || id:ukb-saige-740.1	CD19 on memory B cell || id:ebi-a-GCST90001736	Inverse variance weighted	2	0.0497687648620698	0.0639840708579757	0.436669	-0.07564	0.175177543743702	1.05102803366245	0.927149907460405	1.19145773370154	1
ebi-a-GCST90001736	ukb-saige-740.1	Osteoarthritis; localized || id:ukb-saige-740.1	CD19 on memory B cell || id:ebi-a-GCST90001736	Bayesian Weighted Mendelian Randomization	2	0.0497419603078292	0.0664217622479656	0.453929	-0.0804447	0.179928614313842	1.05099986170209	0.922705933625455	1.19713190198925	1
ebi-a-GCST90001737	ukb-saige-740.1	Osteoarthritis; localized || id:ukb-saige-740.1	CD19 on naive-mature B cell || id:ebi-a-GCST90001737	Inverse variance weighted	2	-0.174797	0.0738218010654456	0.0178932	-0.319487	-0.030106	0.839627683235591	0.726521320354794	0.970342681906836	0.697643028917994
ebi-a-GCST90001737	ukb-saige-740.1	Osteoarthritis; localized || id:ukb-saige-740.1	CD19 on naive-mature B cell || id:ebi-a-GCST90001737	Bayesian Weighted Mendelian Randomization	2	-0.179385	0.081144431531162	0.0270579	-0.338428	-0.0203414	0.835784472137444	0.712890395500697	0.979864069252119	1
ebi-a-GCST90001740	ieu-a-1169	Hip osteoarthritis || id:ieu-a-1169	CD19 on switched memory B cell || id:ebi-a-GCST90001740	Wald ratio	1	0.0601814371257485	0.169047904191617	0.721839	-0.271152	0.391515329341317	1.06202922059496	0.762500240500735	1.47922060281168	1
ebi-a-GCST90001740	ieu-a-1170	Knee and hip osteoarthritis || id:ieu-a-1170	CD19 on switched memory B cell || id:ebi-a-GCST90001740	Wald ratio	1	0.244443113772455	0.14257005988024	0.0864283	-0.0349942	0.523880431137725	1.27691002156419	0.965611013315961	1.68856732233389	1
ebi-a-GCST90001740	ieu-a-1171	Knee osteoarthritis || id:ieu-a-1171	CD19 on switched memory B cell || id:ebi-a-GCST90001740	Wald ratio	1	0.434555089820359	0.164411976047904	0.0082154	0.112307616766467	0.756802562874251	1.54427584204548	1.11885698688128	2.13145013552865	0.498525538404548
ebi-a-GCST90001740	ukb-saige-740.1	Osteoarthritis; localized || id:ukb-saige-740.1	CD19 on switched memory B cell || id:ebi-a-GCST90001740	Inverse variance weighted	2	0.0285730493264949	0.0596579004755695	0.631975	-0.0883564	0.145502534258611	1.02898517476314	0.91543452510575	1.15662066575436	1
ebi-a-GCST90001740	ukb-saige-740.1	Osteoarthritis; localized || id:ukb-saige-740.1	CD19 on switched memory B cell || id:ebi-a-GCST90001740	Bayesian Weighted Mendelian Randomization	2	0.0279426824243672	0.0615872972264826	0.650039	-0.0927684	0.148653784988273	1.02833674096327	0.911404538794982	1.16027121635043	1
ebi-a-GCST90001741	ukb-saige-740.1	Osteoarthritis; localized || id:ukb-saige-740.1	CD19 on IgD+ B cell || id:ebi-a-GCST90001741	Inverse variance weighted	2	0.0382814183662856	0.0631820151537816	0.544587	-0.0855553	0.162118168067697	1.03902359206076	0.918002347353347	1.1759991986636	1
ebi-a-GCST90001741	ukb-saige-740.1	Osteoarthritis; localized || id:ukb-saige-740.1	CD19 on IgD+ B cell || id:ebi-a-GCST90001741	Bayesian Weighted Mendelian Randomization	2	0.039596495642787	0.0660979527024243	0.549134	-0.0899555	0.169148482939539	1.04039088722877	0.913971863741934	1.18429597361687	1
ebi-a-GCST90001743	ieu-a-1169	Hip osteoarthritis || id:ieu-a-1169	CD20 on B cell || id:ebi-a-GCST90001743	Inverse variance weighted	2	0.0487233681599326	0.122553172045559	0.690948	-0.191481	0.288927585369228	1.04992986653237	0.825735438573684	1.33499505185439	1
ebi-a-GCST90001743	ieu-a-1169	Hip osteoarthritis || id:ieu-a-1169	CD20 on B cell || id:ebi-a-GCST90001743	Bayesian Weighted Mendelian Randomization	2	0.0492858205569534	0.12550965290991	0.694552	-0.196713	0.295284740260376	1.05052056820772	0.821426267406462	1.34350885528887	1
ebi-a-GCST90001743	ieu-a-1170	Knee and hip osteoarthritis || id:ieu-a-1170	CD20 on B cell || id:ebi-a-GCST90001743	Inverse variance weighted	2	-0.00773962	0.0860732030746462	0.928352	-0.176443	0.160963856369777	0.99229025209497	0.838246474288486	1.17464	1
ebi-a-GCST90001743	ieu-a-1170	Knee and hip osteoarthritis || id:ieu-a-1170	CD20 on B cell || id:ebi-a-GCST90001743	Bayesian Weighted Mendelian Randomization	2	-0.00788716	0.088215715594782	0.928758	-0.18079	0.16501564206301	0.99214386153546	0.834610639345096	1.17941156699715	1
ebi-a-GCST90001743	ieu-a-1171	Knee osteoarthritis || id:ieu-a-1171	CD20 on B cell || id:ebi-a-GCST90001743	Inverse variance weighted	2	0.0113759710905213	0.118969340000652	0.923822	-0.221804	0.244555877491799	1.01144092351495	0.801072410951823	1.27705401880617	1
ebi-a-GCST90001743	ieu-a-1171	Knee osteoarthritis || id:ieu-a-1171	CD20 on B cell || id:ebi-a-GCST90001743	Bayesian Weighted Mendelian Randomization	2	0.0118769537268214	0.12395734248335	0.923668	-0.231079	0.254833344994187	1.01194776480401	0.793676415828538	1.29024657690354	1
ebi-a-GCST90001745	ieu-a-1169	Hip osteoarthritis || id:ieu-a-1169	CD20 on CD24+ CD27+ B cell || id:ebi-a-GCST90001745	Wald ratio	1	-0.183446	0.240589803554724	0.445772	-0.655002	0.288110271281572	0.832397037308022	0.519441149069538	1.3339	1
ebi-a-GCST90001745	ieu-a-1170	Knee and hip osteoarthritis || id:ieu-a-1170	CD20 on CD24+ CD27+ B cell || id:ebi-a-GCST90001745	Wald ratio	1	-0.0465404	0.189415341440599	0.80591	-0.417794	0.324713704396632	0.954526030514314	0.658497579192697	1.38363446080762	1
ebi-a-GCST90001745	ieu-a-1171	Knee osteoarthritis || id:ieu-a-1171	CD20 on CD24+ CD27+ B cell || id:ebi-a-GCST90001745	Wald ratio	1	0.0944934518241347	0.241871375116932	0.696036	-0.379574	0.568561347053321	1.09910196599646	0.684152492876971	1.76572495786333	1
ebi-a-GCST90001745	ukb-saige-740.1	Osteoarthritis; localized || id:ukb-saige-740.1	CD20 on CD24+ CD27+ B cell || id:ebi-a-GCST90001745	Inverse variance weighted	6	0.0247114345613631	0.0313258678257919	0.430199	-0.0366873	0.0861101354999152	1.02501929270183	0.963977556407871	1.08992636127973	1
ebi-a-GCST90001745	ukb-saige-740.1	Osteoarthritis; localized || id:ukb-saige-740.1	CD20 on CD24+ CD27+ B cell || id:ebi-a-GCST90001745	Bayesian Weighted Mendelian Randomization	6	0.0252924348708095	0.0318987949333829	0.427838	-0.0372292	0.08781407294024	1.02561500226504	0.963455283007395	1.0917851107606	1
ebi-a-GCST90001745	ukb-saige-740.1	Osteoarthritis; localized || id:ukb-saige-740.1	CD20 on CD24+ CD27+ B cell || id:ebi-a-GCST90001745	MR Egger	6	0.0174150228831589	0.159971845779197	0.918554	-0.29613	0.330959840610386	1.01756754852021	0.743690894511851	1.39230387711158	0.998524067790455
ebi-a-GCST90001745	ukb-saige-740.1	Osteoarthritis; localized || id:ukb-saige-740.1	CD20 on CD24+ CD27+ B cell || id:ebi-a-GCST90001745	Weighted median	6	0.0375305000374403	0.036822724271413	0.308098	-0.034642	0.10970303960941	1.03824366306951	0.965951126693474	1.11594662930194	0.974299104969666
ebi-a-GCST90001745	ukb-saige-740.1	Osteoarthritis; localized || id:ukb-saige-740.1	CD20 on CD24+ CD27+ B cell || id:ebi-a-GCST90001745	Weighted mode	6	0.0409294321440543	0.0400918384097704	0.354134	-0.0376506	0.119509435427204	1.04177858687024	0.963049399358239	1.12694387721396	0.974498079964075
ebi-a-GCST90001746	ieu-a-1170	Knee and hip osteoarthritis || id:ieu-a-1170	CD20 on IgD+ CD24+ B cell || id:ebi-a-GCST90001746	Wald ratio	1	0.0970350624399616	0.200490874159462	0.628395	-0.295927	0.489997175792507	1.10189900821151	0.743841688613391	1.63231160996219	1
ebi-a-GCST90001746	ieu-a-1171	Knee osteoarthritis || id:ieu-a-1171	CD20 on IgD+ CD24+ B cell || id:ebi-a-GCST90001746	Wald ratio	1	0.146297790585975	0.253534582132565	0.563917	-0.35063	0.643225571565802	1.15754084149645	0.704244282803254	1.9026079905098	1
ebi-a-GCST90001746	ukb-saige-740.1	Osteoarthritis; localized || id:ukb-saige-740.1	CD20 on IgD+ CD24+ B cell || id:ebi-a-GCST90001746	Inverse variance weighted	2	0.0886422929582287	0.0523073074854642	0.0901429	-0.01388	0.191164615629738	1.0926897236022	0.98621585376465	1.21065872902788	1
ebi-a-GCST90001746	ukb-saige-740.1	Osteoarthritis; localized || id:ukb-saige-740.1	CD20 on IgD+ CD24+ B cell || id:ebi-a-GCST90001746	Bayesian Weighted Mendelian Randomization	2	0.0905480296422771	0.0550269246761481	0.0998622	-0.0173047	0.198400802007527	1.09477408798675	0.9828441243981	1.2194510543177	1
ebi-a-GCST90001748	ieu-a-1169	Hip osteoarthritis || id:ieu-a-1169	CD20 on IgD+ CD38- B cell || id:ebi-a-GCST90001748	Wald ratio	1	0.0785791520809024	0.201136133800078	0.696036	-0.315648	0.472805974329055	1.0817489744561	0.729316364818456	1.60449004051638	1
ebi-a-GCST90001748	ieu-a-1171	Knee osteoarthritis || id:ieu-a-1171	CD20 on IgD+ CD38- B cell || id:ebi-a-GCST90001748	Wald ratio	1	-0.0387022	0.195181641384675	0.84282	-0.421258	0.343853838973162	0.9620371821875	0.656220646476884	1.41037247895227	1
ebi-a-GCST90001751	ieu-a-1169	Hip osteoarthritis || id:ieu-a-1169	CD20 on IgD+ CD38+ B cell || id:ebi-a-GCST90001751	Wald ratio	1	-0.304592	0.206530285035629	0.140265	-0.709391	0.100207315914489	0.737424150560153	0.491943502487927	1.1054000613469	1
ebi-a-GCST90001751	ieu-a-1170	Knee and hip osteoarthritis || id:ieu-a-1170	CD20 on IgD+ CD38+ B cell || id:ebi-a-GCST90001751	Wald ratio	1	-0.180874	0.156309382422803	0.247209	-0.48724	0.125492280285036	0.834540412990068	0.614319272121842	1.13370641703635	1
ebi-a-GCST90001751	ieu-a-1171	Knee osteoarthritis || id:ieu-a-1171	CD20 on IgD+ CD38+ B cell || id:ebi-a-GCST90001751	Wald ratio	1	-0.119969	0.202280878859857	0.553128	-0.516439	0.276501995249406	0.886948350923137	0.596641379833258	1.3185095834706	1
ebi-a-GCST90001752	ieu-a-1169	Hip osteoarthritis || id:ieu-a-1169	CD20 on IgD+ CD38dim B cell || id:ebi-a-GCST90001752	Inverse variance weighted	2	-0.301172	0.154339559976657	0.0510141	-0.603678	0.00133332008567327	0.739950329400438	0.546796948377602	1.00133420935208	0.986957653351087
ebi-a-GCST90001752	ieu-a-1169	Hip osteoarthritis || id:ieu-a-1169	CD20 on IgD+ CD38dim B cell || id:ebi-a-GCST90001752	Bayesian Weighted Mendelian Randomization	2	-0.305655	0.163054104936278	0.0608527	-0.625241	0.0139306976848868	0.736640460325342	0.535132235394682	1.01402818200274	1
ebi-a-GCST90001752	ieu-a-1170	Knee and hip osteoarthritis || id:ieu-a-1170	CD20 on IgD+ CD38dim B cell || id:ebi-a-GCST90001752	Inverse variance weighted	2	-0.199485	0.115473481337206	0.084071	-0.425813	0.0268431609908323	0.819152620699134	0.653238560863292	1.02720668405043	1
ebi-a-GCST90001752	ieu-a-1170	Knee and hip osteoarthritis || id:ieu-a-1170	CD20 on IgD+ CD38dim B cell || id:ebi-a-GCST90001752	Bayesian Weighted Mendelian Randomization	2	-0.202469	0.121296088058371	0.0950747	-0.44021	0.0352710588315601	0.816711576686177	0.643901441101805	1.03590046071626	1
ebi-a-GCST90001752	ieu-a-1171	Knee osteoarthritis || id:ieu-a-1171	CD20 on IgD+ CD38dim B cell || id:ebi-a-GCST90001752	Inverse variance weighted	2	-0.0596642	0.143248811796841	0.677039	-0.340432	0.221103432277877	0.942080794623904	0.711462968446364	1.24745245074005	1
ebi-a-GCST90001752	ieu-a-1171	Knee osteoarthritis || id:ieu-a-1171	CD20 on IgD+ CD38dim B cell || id:ebi-a-GCST90001752	Bayesian Weighted Mendelian Randomization	2	-0.0607477	0.148034054077009	0.68154	-0.350894	0.229399055049235	0.941060647950519	0.704058072462631	1.25784388782511	1
ebi-a-GCST90001753	ieu-a-1169	Hip osteoarthritis || id:ieu-a-1169	CD20 on IgD- CD24- B cell || id:ebi-a-GCST90001753	Wald ratio	1	0.0512770408163265	0.172027040816327	0.765646	-0.285896	0.388450040816327	1.05261447006407	0.751340781988884	1.47469330715054	1
ebi-a-GCST90001753	ieu-a-1170	Knee and hip osteoarthritis || id:ieu-a-1170	CD20 on IgD- CD24- B cell || id:ebi-a-GCST90001753	Wald ratio	1	-0.050767	0.116633673469388	0.663367	-0.279369	0.177835010204082	0.950500120958485	0.756260799206988	1.19462820351055	1
ebi-a-GCST90001753	ieu-a-1171	Knee osteoarthritis || id:ieu-a-1171	CD20 on IgD- CD24- B cell || id:ebi-a-GCST90001753	Wald ratio	1	-0.101034	0.165295408163265	0.541047	-0.425013	0.222945326530612	0.903902594837033	0.653761499650992	1.24975224357705	1
ebi-a-GCST90001753	ukb-saige-740.1	Osteoarthritis; localized || id:ukb-saige-740.1	CD20 on IgD- CD24- B cell || id:ebi-a-GCST90001753	Wald ratio	1	0.0561224489795918	0.0663265306122449	0.397467	-0.0738776	0.186122448979592	1.05772719342281	0.928785415704995	1.20456974968418	1
ebi-a-GCST90001754	ieu-a-1169	Hip osteoarthritis || id:ieu-a-1169	CD20 on IgD- CD27- B cell || id:ebi-a-GCST90001754	Wald ratio	1	0.0527021499737808	0.176808075511274	0.765646	-0.293842	0.399245977975878	1.05411562998894	0.745394494427849	1.49070025294443	1
ebi-a-GCST90001754	ieu-a-1170	Knee and hip osteoarthritis || id:ieu-a-1170	CD20 on IgD- CD27- B cell || id:ebi-a-GCST90001754	Wald ratio	1	-0.0521779	0.119875196643943	0.663367	-0.287133	0.182777461982171	0.949159974010692	0.750411685640984	1.20054721095454	1
ebi-a-GCST90001754	ieu-a-1171	Knee osteoarthritis || id:ieu-a-1171	CD20 on IgD- CD27- B cell || id:ebi-a-GCST90001754	Wald ratio	1	-0.103842	0.169889355007866	0.541047	-0.436825	0.229141499737808	0.901368030295833	0.64608463367953	1.25751996516665	1
ebi-a-GCST90001754	ukb-saige-740.1	Osteoarthritis; localized || id:ukb-saige-740.1	CD20 on IgD- CD27- B cell || id:ebi-a-GCST90001754	Inverse variance weighted	4	-0.0100202	0.0389951078819432	0.79721	-0.0864506	0.0664102303529646	0.990029853660392	0.917180863238173	1.06866502608689	1
ebi-a-GCST90001754	ukb-saige-740.1	Osteoarthritis; localized || id:ukb-saige-740.1	CD20 on IgD- CD27- B cell || id:ebi-a-GCST90001754	Bayesian Weighted Mendelian Randomization	4	-0.0100781	0.039951912973161	0.800844	-0.0883838	0.0682276751873054	0.989972539378136	0.915409453471677	1.0706090318447	1
ebi-a-GCST90001754	ukb-saige-740.1	Osteoarthritis; localized || id:ukb-saige-740.1	CD20 on IgD- CD27- B cell || id:ebi-a-GCST90001754	MR Egger	4	-0.335756	0.61498532596241	0.639855	-1.54113	0.869615338946289	0.714797566651123	0.214139600292143	2.38599287844619	0.998524067790455
ebi-a-GCST90001754	ukb-saige-740.1	Osteoarthritis; localized || id:ukb-saige-740.1	CD20 on IgD- CD27- B cell || id:ebi-a-GCST90001754	Weighted median	4	-0.0345568	0.0481027051516962	0.472513	-0.128838	0.0597245066938628	0.966033471867594	0.879116285147988	1.06154405797575	0.974299104969666
ebi-a-GCST90001754	ukb-saige-740.1	Osteoarthritis; localized || id:ukb-saige-740.1	CD20 on IgD- CD27- B cell || id:ebi-a-GCST90001754	Weighted mode	4	-0.0381114	0.065067119289436	0.59921	-0.165643	0.0894201891999527	0.962605734712152	0.84734875281028	1.09354005352291	0.974498079964075
ebi-a-GCST90001755	ieu-a-1169	Hip osteoarthritis || id:ieu-a-1169	CD20 on IgD- CD38- B cell || id:ebi-a-GCST90001755	Inverse variance weighted	2	0.0690194509592037	0.17543527664717	0.694011	-0.274834	0.412872593187657	1.07145704981302	0.759698457205626	1.51115248254782	1
ebi-a-GCST90001755	ieu-a-1169	Hip osteoarthritis || id:ieu-a-1169	CD20 on IgD- CD38- B cell || id:ebi-a-GCST90001755	Bayesian Weighted Mendelian Randomization	2	0.0719785269569566	0.183080258338728	0.694207	-0.286859	0.430815833300863	1.07463226819111	0.750617724047694	1.53851218115413	1
ebi-a-GCST90001755	ieu-a-1170	Knee and hip osteoarthritis || id:ieu-a-1170	CD20 on IgD- CD38- B cell || id:ebi-a-GCST90001755	Inverse variance weighted	2	0.0839669175933631	0.13336476908653	0.528954	-0.177428	0.345361865002963	1.08759291302266	0.837421266529447	1.41250096186269	1
ebi-a-GCST90001755	ieu-a-1170	Knee and hip osteoarthritis || id:ieu-a-1170	CD20 on IgD- CD38- B cell || id:ebi-a-GCST90001755	Bayesian Weighted Mendelian Randomization	2	0.0858037018813178	0.138659096612195	0.536041	-0.185968	0.35757553124122	1.08959242236851	0.830300058316594	1.42985856136143	1
ebi-a-GCST90001755	ieu-a-1171	Knee osteoarthritis || id:ieu-a-1171	CD20 on IgD- CD38- B cell || id:ebi-a-GCST90001755	Inverse variance weighted	2	0.133817656928174	0.172459397934943	0.437786	-0.204203	0.471838076880663	1.14318434889279	0.815297042332552	1.60293781002135	1
ebi-a-GCST90001755	ieu-a-1171	Knee osteoarthritis || id:ieu-a-1171	CD20 on IgD- CD38- B cell || id:ebi-a-GCST90001755	Bayesian Weighted Mendelian Randomization	2	0.136176892450812	0.179228543836651	0.447377	-0.215111	0.487464838370648	1.14588457399866	0.806451875925787	1.62818327556215	1
ebi-a-GCST90001755	ukb-saige-740.1	Osteoarthritis; localized || id:ukb-saige-740.1	CD20 on IgD- CD38- B cell || id:ebi-a-GCST90001755	Inverse variance weighted	4	0.0177246231269581	0.0400451515286889	0.658044	-0.0607639	0.0962131201231883	1.01788263645445	0.94104541895744	1.10099368290142	1
ebi-a-GCST90001755	ukb-saige-740.1	Osteoarthritis; localized || id:ukb-saige-740.1	CD20 on IgD- CD38- B cell || id:ebi-a-GCST90001755	Bayesian Weighted Mendelian Randomization	4	0.0181646225156304	0.0409358747500659	0.657235	-0.0620697	0.0983989370257596	1.01833060273745	0.939817386760554	1.10340288558187	1
ebi-a-GCST90001755	ukb-saige-740.1	Osteoarthritis; localized || id:ukb-saige-740.1	CD20 on IgD- CD38- B cell || id:ebi-a-GCST90001755	MR Egger	4	0.838560714114708	0.634408090196606	0.317166	-0.404879	2.08200057090006	2.3130354605635	0.667057424765873	8.02049845064244	0.998524067790455
ebi-a-GCST90001755	ukb-saige-740.1	Osteoarthritis; localized || id:ukb-saige-740.1	CD20 on IgD- CD38- B cell || id:ebi-a-GCST90001755	Weighted median	4	0.0407556753576464	0.0441765675250342	0.356235	-0.0458304	0.127341747706713	1.04159758649631	0.955203953917576	1.13580511025456	0.974299104969666
ebi-a-GCST90001755	ukb-saige-740.1	Osteoarthritis; localized || id:ukb-saige-740.1	CD20 on IgD- CD38- B cell || id:ebi-a-GCST90001755	Weighted mode	4	0.042914907417902	0.048050910011077	0.4376	-0.0512649	0.137094691039613	1.04384906725893	0.950026997658165	1.14693674801166	0.974498079964075
ebi-a-GCST90001757	ieu-a-1169	Hip osteoarthritis || id:ieu-a-1169	CD20 on IgD- CD38dim B cell || id:ebi-a-GCST90001757	Wald ratio	1	0.0760357546104629	0.194625893865262	0.696036	-0.305431	0.457502506586376	1.0790011527335	0.736805744612969	1.58012270684967	1
ebi-a-GCST90001757	ieu-a-1171	Knee osteoarthritis || id:ieu-a-1171	CD20 on IgD- CD38dim B cell || id:ebi-a-GCST90001757	Wald ratio	1	-0.0374495	0.188864132480241	0.84282	-0.407623	0.332724207753105	0.963243068061533	0.665229495684395	1.39476258071513	1
ebi-a-GCST90001757	ukb-saige-740.1	Osteoarthritis; localized || id:ukb-saige-740.1	CD20 on IgD- CD38dim B cell || id:ebi-a-GCST90001757	Inverse variance weighted	7	0.00961968628198928	0.0268508580320934	0.720146	-0.043008	0.0622473680248924	1.00966610418657	0.957903731154571	1.06422556754692	1
ebi-a-GCST90001757	ukb-saige-740.1	Osteoarthritis; localized || id:ukb-saige-740.1	CD20 on IgD- CD38dim B cell || id:ebi-a-GCST90001757	Bayesian Weighted Mendelian Randomization	7	0.00985953608831984	0.0274271366144716	0.719235	-0.0438977	0.0636167238526842	1.00990830145044	0.957052	1.06568386926903	1
ebi-a-GCST90001757	ukb-saige-740.1	Osteoarthritis; localized || id:ukb-saige-740.1	CD20 on IgD- CD38dim B cell || id:ebi-a-GCST90001757	MR Egger	7	0.0801250126549535	0.12077032870494	0.536403	-0.156585	0.316834856916636	1.08342250073261	0.855058978599147	1.37277584876866	0.998524067790455
ebi-a-GCST90001757	ukb-saige-740.1	Osteoarthritis; localized || id:ukb-saige-740.1	CD20 on IgD- CD38dim B cell || id:ebi-a-GCST90001757	Weighted median	7	0.00804810078915337	0.0338455936503139	0.812045	-0.0582893	0.0743854643437686	1.00808057380923	0.943377024118555	1.07722195613261	0.974299104969666
ebi-a-GCST90001757	ukb-saige-740.1	Osteoarthritis; localized || id:ukb-saige-740.1	CD20 on IgD- CD38dim B cell || id:ebi-a-GCST90001757	Weighted mode	7	0.0188825424584002	0.0368987724256857	0.627116	-0.0534391	0.0912041364127442	1.0190619450767	0.947963716213532	1.09549261236659	0.974498079964075
ebi-a-GCST90001758	ieu-a-1169	Hip osteoarthritis || id:ieu-a-1169	CD20 on memory B cell || id:ebi-a-GCST90001758	Inverse variance weighted	2	0.0466799008200349	0.150802176713182	0.756908	-0.248892	0.342252167177871	1.04778655977543	0.779663887571824	1.40811533321774	1
ebi-a-GCST90001758	ieu-a-1169	Hip osteoarthritis || id:ieu-a-1169	CD20 on memory B cell || id:ebi-a-GCST90001758	Bayesian Weighted Mendelian Randomization	2	0.0471893007558776	0.155128914122224	0.76098	-0.256863	0.351241972435438	1.04832043814902	0.773473885568905	1.42083108627854	1
ebi-a-GCST90001758	ieu-a-1170	Knee and hip osteoarthritis || id:ieu-a-1170	CD20 on memory B cell || id:ebi-a-GCST90001758	Inverse variance weighted	2	0.032724656166557	0.111825897827487	0.769798	-0.186454	0.251903415908432	1.0332659966491	0.829896650366386	1.28647177857617	1
ebi-a-GCST90001758	ieu-a-1170	Knee and hip osteoarthritis || id:ieu-a-1170	CD20 on memory B cell || id:ebi-a-GCST90001758	Bayesian Weighted Mendelian Randomization	2	0.0335122545386827	0.115195356318799	0.771115	-0.192271	0.259295152923529	1.03408011582341	0.825083534489878	1.29601627137365	1
ebi-a-GCST90001758	ieu-a-1171	Knee osteoarthritis || id:ieu-a-1171	CD20 on memory B cell || id:ebi-a-GCST90001758	Inverse variance weighted	2	0.0292798035085941	0.144946349373595	0.839913	-0.254815	0.31337464828084	1.02971267138908	0.77505983879298	1.36803396660378	1
ebi-a-GCST90001758	ieu-a-1171	Knee osteoarthritis || id:ieu-a-1171	CD20 on memory B cell || id:ebi-a-GCST90001758	Bayesian Weighted Mendelian Randomization	2	0.0302562380766237	0.149408783190605	0.839521	-0.262585	0.323097453130209	1.03072	0.769061009112111	1.38139996609695	1
ebi-a-GCST90001760	ieu-a-1169	Hip osteoarthritis || id:ieu-a-1169	CD20 on unswitched memory B cell || id:ebi-a-GCST90001760	Inverse variance weighted	2	-0.0548571	0.150737167261841	0.715914	-0.350302	0.240587766173876	0.946620427707044	0.704475355718335	1.27199656720219	1
ebi-a-GCST90001760	ieu-a-1169	Hip osteoarthritis || id:ieu-a-1169	CD20 on unswitched memory B cell || id:ebi-a-GCST90001760	Bayesian Weighted Mendelian Randomization	2	-0.0565734	0.155942515824662	0.716766	-0.362221	0.249073927549251	0.944997115884538	0.696128691274472	1.28284	1
ebi-a-GCST90001760	ieu-a-1170	Knee and hip osteoarthritis || id:ieu-a-1170	CD20 on unswitched memory B cell || id:ebi-a-GCST90001760	Inverse variance weighted	2	-0.0411502	0.114371065742024	0.719	-0.265317	0.183017092458654	0.959684977897812	0.766962412064859	1.20083493312686	1
ebi-a-GCST90001760	ieu-a-1170	Knee and hip osteoarthritis || id:ieu-a-1170	CD20 on unswitched memory B cell || id:ebi-a-GCST90001760	Bayesian Weighted Mendelian Randomization	2	-0.0417834	0.117854027302025	0.722938	-0.272777	0.189210525332243	0.959077524779646	0.761262331030118	1.20829530247841	1
ebi-a-GCST90001760	ieu-a-1171	Knee osteoarthritis || id:ieu-a-1171	CD20 on unswitched memory B cell || id:ebi-a-GCST90001760	Inverse variance weighted	2	-0.028672	0.148585963073313	0.846986	-0.319901	0.2625564563256	0.971735110913641	0.726221278756123	1.30024987342659	1
ebi-a-GCST90001760	ieu-a-1171	Knee osteoarthritis || id:ieu-a-1171	CD20 on unswitched memory B cell || id:ebi-a-GCST90001760	Bayesian Weighted Mendelian Randomization	2	-0.0287198	0.153420381313528	0.851507	-0.329424	0.271984177052117	0.971688722334845	0.719338155857459	1.31256623247971	1
ebi-a-GCST90001761	ieu-a-1170	Knee and hip osteoarthritis || id:ieu-a-1170	CD20 on switched memory B cell || id:ebi-a-GCST90001761	Inverse variance weighted	3	0.0786786280913323	0.100223207315547	0.432434	-0.117759	0.275116114429804	1.08185658788076	0.888910380179128	1.3166835519517	1
ebi-a-GCST90001761	ieu-a-1170	Knee and hip osteoarthritis || id:ieu-a-1170	CD20 on switched memory B cell || id:ebi-a-GCST90001761	Bayesian Weighted Mendelian Randomization	3	0.0797093613747494	0.103034078416669	0.439155	-0.122237	0.28165615507142	1.08297226835949	0.884938230617999	1.32532293606149	1
ebi-a-GCST90001761	ieu-a-1170	Knee and hip osteoarthritis || id:ieu-a-1170	CD20 on switched memory B cell || id:ebi-a-GCST90001761	MR Egger	3	0.00134186359821814	0.578790382375142	0.998524	-1.13309	1.1357710130535	1.00134	0.322037498304226	3.11357322329198	0.998524067790455
ebi-a-GCST90001761	ieu-a-1170	Knee and hip osteoarthritis || id:ieu-a-1170	CD20 on switched memory B cell || id:ebi-a-GCST90001761	Weighted median	3	0.0800699441283344	0.114166708273181	0.483089	-0.143697	0.30383669234377	1.08336283989452	0.86615032148903	1.35504774834768	0.974299104969666
ebi-a-GCST90001761	ieu-a-1170	Knee and hip osteoarthritis || id:ieu-a-1170	CD20 on switched memory B cell || id:ebi-a-GCST90001761	Weighted mode	3	0.0675764228445109	0.127643006027845	0.649407	-0.182604	0.317756714659086	1.06991202219371	0.833098106391852	1.37404193630013	0.974498079964075
ebi-a-GCST90001761	ieu-a-1171	Knee osteoarthritis || id:ieu-a-1171	CD20 on switched memory B cell || id:ebi-a-GCST90001761	Inverse variance weighted	3	0.124733544312491	0.128888530117915	0.333163	-0.127888	0.377355063343605	1.13284655943914	0.879951950488151	1.45842204965983	1
ebi-a-GCST90001761	ieu-a-1171	Knee osteoarthritis || id:ieu-a-1171	CD20 on switched memory B cell || id:ebi-a-GCST90001761	Bayesian Weighted Mendelian Randomization	3	0.126092117407525	0.132516098650432	0.341339	-0.133639	0.385823670762371	1.13438666022846	0.874905467199462	1.47082529844439	1
ebi-a-GCST90001761	ieu-a-1171	Knee osteoarthritis || id:ieu-a-1171	CD20 on switched memory B cell || id:ebi-a-GCST90001761	MR Egger	3	0.183180416935577	0.743274495947406	0.84617	-1.27364	1.63999842899249	1.20103107488113	0.279811925786057	5.15516141343104	0.998524067790455
ebi-a-GCST90001761	ieu-a-1171	Knee osteoarthritis || id:ieu-a-1171	CD20 on switched memory B cell || id:ebi-a-GCST90001761	Weighted median	3	0.13768371966641	0.141540099578529	0.330676	-0.139735	0.415102314840327	1.14761252559599	0.869588754116489	1.51452569121931	0.974299104969666
ebi-a-GCST90001761	ieu-a-1171	Knee osteoarthritis || id:ieu-a-1171	CD20 on switched memory B cell || id:ebi-a-GCST90001761	Weighted mode	3	0.139141880292767	0.170392984046681	0.499955	-0.194828	0.473112129024261	1.14928714963383	0.822975894573025	1.60498133787836	0.974498079964075
ebi-a-GCST90001761	ukb-saige-740.1	Osteoarthritis; localized || id:ukb-saige-740.1	CD20 on switched memory B cell || id:ebi-a-GCST90001761	Inverse variance weighted	7	0.0156582351977569	0.0267992882169646	0.559033	-0.0368684	0.0681848401030074	1.01578146772364	0.963802992669581	1.07056317319875	1
ebi-a-GCST90001761	ukb-saige-740.1	Osteoarthritis; localized || id:ukb-saige-740.1	CD20 on switched memory B cell || id:ebi-a-GCST90001761	Bayesian Weighted Mendelian Randomization	7	0.0159584079479293	0.027362711806756	0.559747	-0.0376725	0.069589323089171	1.01608642340779	0.963028274086105	1.07206781733734	1
ebi-a-GCST90001761	ukb-saige-740.1	Osteoarthritis; localized || id:ukb-saige-740.1	CD20 on switched memory B cell || id:ebi-a-GCST90001761	MR Egger	7	0.11644479225255	0.1061462493142	0.322633	-0.0916019	0.324491440908381	1.12349548310013	0.912468370672201	1.38332696355987	0.998524067790455
ebi-a-GCST90001761	ukb-saige-740.1	Osteoarthritis; localized || id:ukb-saige-740.1	CD20 on switched memory B cell || id:ebi-a-GCST90001761	Weighted median	7	0.0298081909829853	0.0323681256069118	0.357096	-0.0336333	0.0932497171725324	1.03025690243664	0.966925977360961	1.09773582453055	0.974299104969666
ebi-a-GCST90001761	ukb-saige-740.1	Osteoarthritis; localized || id:ukb-saige-740.1	CD20 on switched memory B cell || id:ebi-a-GCST90001761	Weighted mode	7	0.0247252422892872	0.035992036693909	0.517762	-0.0458192	0.0952696342093489	1.02503344598705	0.955214697501354	1.09995540074968	0.974498079964075
ebi-a-GCST90001762	ieu-a-1169	Hip osteoarthritis || id:ieu-a-1169	CD20 on IgD+ B cell || id:ebi-a-GCST90001762	Wald ratio	1	0.0445603672189879	0.169138378862517	0.7922	-0.286951	0.376071589789521	1.04556809284339	0.750548613378475	1.45655140424715	1
ebi-a-GCST90001762	ieu-a-1170	Knee and hip osteoarthritis || id:ieu-a-1170	CD20 on IgD+ B cell || id:ebi-a-GCST90001762	Wald ratio	1	0.0445603672189879	0.123930138826691	0.719176	-0.198343	0.287463439319301	1.04556809284339	0.820088756554005	1.33304185435467	1
ebi-a-GCST90001762	ieu-a-1171	Knee osteoarthritis || id:ieu-a-1171	CD20 on IgD+ B cell || id:ebi-a-GCST90001762	Wald ratio	1	0.132372592924317	0.165858486341245	0.424809	-0.19271	0.457455226153157	1.14153356737017	0.824721075344437	1.58004799972966	1
ebi-a-GCST90001763	ukb-saige-740.1	Osteoarthritis; localized || id:ukb-saige-740.1	CD20 on transitional B cell || id:ebi-a-GCST90001763	Inverse variance weighted	2	3.56801770210729e-05	0.0390062319319654	0.99927	-0.0764165	0.0764878947636732	1.00003568081357	0.926430236108514	1.07948912278713	1
ebi-a-GCST90001763	ukb-saige-740.1	Osteoarthritis; localized || id:ukb-saige-740.1	CD20 on transitional B cell || id:ebi-a-GCST90001763	Bayesian Weighted Mendelian Randomization	2	0.000126459234542746	0.0396746650435439	0.997457	-0.0776359	0.0778888027198887	1.00012646723085	0.925301281982154	1.08100244745468	1
ebi-a-GCST90001765	ieu-a-1170	Knee and hip osteoarthritis || id:ieu-a-1170	CD24 on IgD+ CD24+ B cell || id:ebi-a-GCST90001765	Wald ratio	1	0.0591929208804283	0.120265913146936	0.622589	-0.176528	0.294914110648424	1.06097990617502	0.838175084543049	1.34301100338821	1
ebi-a-GCST90001765	ukb-saige-740.1	Osteoarthritis; localized || id:ukb-saige-740.1	CD24 on IgD+ CD24+ B cell || id:ebi-a-GCST90001765	Inverse variance weighted	2	-0.0225451	0.0271370990424376	0.406095	-0.0757338	0.0306436066311825	0.977707134281925	0.927062937836085	1.03111795479283	1
ebi-a-GCST90001765	ukb-saige-740.1	Osteoarthritis; localized || id:ukb-saige-740.1	CD24 on IgD+ CD24+ B cell || id:ebi-a-GCST90001765	Bayesian Weighted Mendelian Randomization	2	-0.022618	0.0273978116941218	0.409064	-0.0763177	0.0310816753078164	0.977635834537968	0.926521760704941	1.0315697542231	1
ebi-a-GCST90001766	ieu-a-1170	Knee and hip osteoarthritis || id:ieu-a-1170	CD24 on IgD+ CD38- B cell || id:ebi-a-GCST90001766	Wald ratio	1	0.071277435530086	0.144818767908309	0.622589	-0.212567	0.355122220630373	1.0738791167657	0.808505861965426	1.42635497363257	1
ebi-a-GCST90001766	ukb-saige-740.1	Osteoarthritis; localized || id:ukb-saige-740.1	CD24 on IgD+ CD38- B cell || id:ebi-a-GCST90001766	Inverse variance weighted	2	-0.0314894	0.0427707565575254	0.461587	-0.11532	0.0523412815208711	0.969001226521724	0.891080877358544	1.05373530154075	1
ebi-a-GCST90001766	ukb-saige-740.1	Osteoarthritis; localized || id:ukb-saige-740.1	CD24 on IgD+ CD38- B cell || id:ebi-a-GCST90001766	Bayesian Weighted Mendelian Randomization	2	-0.0316943	0.0438700703100597	0.470013	-0.11768	0.0542910478444737	0.968802709524264	0.888980811761958	1.05579184338219	1
ebi-a-GCST90001767	ieu-a-1170	Knee and hip osteoarthritis || id:ieu-a-1170	CD24 on IgD+ CD38- unswitched memory B cell || id:ebi-a-GCST90001767	Wald ratio	1	0.0470687322611164	0.0956324503311258	0.622589	-0.140371	0.234508334910123	1.04819405135105	0.869035875953309	1.26428701011046	1
ebi-a-GCST90001767	ukb-saige-740.1	Osteoarthritis; localized || id:ukb-saige-740.1	CD24 on IgD+ CD38- unswitched memory B cell || id:ebi-a-GCST90001767	Inverse variance weighted	2	-0.0190655	0.0237567826856837	0.422247	-0.0656288	0.0274977717378307	0.981115075194803	0.936478405221971	1.02787932472009	1
ebi-a-GCST90001767	ukb-saige-740.1	Osteoarthritis; localized || id:ukb-saige-740.1	CD24 on IgD+ CD38- unswitched memory B cell || id:ebi-a-GCST90001767	Bayesian Weighted Mendelian Randomization	2	-0.0191587	0.0241204220361333	0.427025	-0.0664347	0.0281173300236221	0.981023664212249	0.93572399384727	1.02851635319027	1
ebi-a-GCST90001768	ieu-a-1169	Hip osteoarthritis || id:ieu-a-1169	CD24 on IgD+ CD38+ B cell || id:ebi-a-GCST90001768	Wald ratio	1	-0.359617	0.285125371655104	0.207216	-0.918463	0.199228780971259	0.697943623942233	0.399132165168465	1.22046115225019	1
ebi-a-GCST90001768	ieu-a-1170	Knee and hip osteoarthritis || id:ieu-a-1170	CD24 on IgD+ CD38+ B cell || id:ebi-a-GCST90001768	Wald ratio	1	-0.100112	0.20684935579782	0.628395	-0.505537	0.30531224975223	0.904735640760461	0.603181444232717	1.35704867496957	1
ebi-a-GCST90001768	ukb-saige-740.1	Osteoarthritis; localized || id:ukb-saige-740.1	CD24 on IgD+ CD38+ B cell || id:ebi-a-GCST90001768	Inverse variance weighted	2	-0.0460051	0.0505120819183305	0.362415	-0.145009	0.0529986201248142	0.955037129275063	0.865014731988213	1.05442819013906	1
ebi-a-GCST90001768	ukb-saige-740.1	Osteoarthritis; localized || id:ukb-saige-740.1	CD24 on IgD+ CD38+ B cell || id:ebi-a-GCST90001768	Bayesian Weighted Mendelian Randomization	2	-0.0466799	0.0519896933601743	0.369255	-0.14858	0.0552198648927452	0.954392817313064	0.861931279995661	1.05677293640318	1
ebi-a-GCST90001769	ieu-a-1170	Knee and hip osteoarthritis || id:ieu-a-1170	CD24 on IgD- CD38- B cell || id:ebi-a-GCST90001769	Wald ratio	1	0.0553411012235818	0.112439933259177	0.622589	-0.165041	0.275723370411568	1.05690106344319	0.847858798748583	1.31748335873386	1
ebi-a-GCST90001769	ukb-saige-740.1	Osteoarthritis; localized || id:ukb-saige-740.1	CD24 on IgD- CD38- B cell || id:ebi-a-GCST90001769	Inverse variance weighted	2	-0.0247353	0.0343182972328527	0.471057	-0.0919991	0.0425285785249759	0.975568126292068	0.912105927910595	1.04344587609161	1
ebi-a-GCST90001769	ukb-saige-740.1	Osteoarthritis; localized || id:ukb-saige-740.1	CD24 on IgD- CD38- B cell || id:ebi-a-GCST90001769	Bayesian Weighted Mendelian Randomization	2	-0.0248286	0.0348776495077551	0.476541	-0.0931888	0.0435316182286288	0.975477119049994	0.911021512499047	1.04449301880901	1
ebi-a-GCST90001771	ieu-a-1170	Knee and hip osteoarthritis || id:ieu-a-1170	CD24 on memory B cell || id:ebi-a-GCST90001771	Wald ratio	1	0.0553103390772651	0.112377431906615	0.622589	-0.164949	0.27557010561423	1.0568685513981	0.847936585310733	1.31728	1
ebi-a-GCST90001771	ukb-saige-740.1	Osteoarthritis; localized || id:ukb-saige-740.1	CD24 on memory B cell || id:ebi-a-GCST90001771	Inverse variance weighted	2	-0.0270482	0.0287971392315162	0.347594	-0.0834906	0.0293942068248188	0.973314340202441	0.919899753040276	1.02983048067221	1
ebi-a-GCST90001771	ukb-saige-740.1	Osteoarthritis; localized || id:ukb-saige-740.1	CD24 on memory B cell || id:ebi-a-GCST90001771	Bayesian Weighted Mendelian Randomization	2	-0.027147	0.0291150617157945	0.351128	-0.0842125	0.0299185226703309	0.973218169599646	0.919235880010345	1.03037057869002	1
ebi-a-GCST90001772	ieu-a-1170	Knee and hip osteoarthritis || id:ieu-a-1170	CD24 on unswitched memory B cell || id:ebi-a-GCST90001772	Wald ratio	1	0.0613082563154652	0.124563770794824	0.622589	-0.182837	0.305453247073321	1.06322660999475	0.832904129193986	1.3572400286872	1
ebi-a-GCST90001772	ukb-saige-740.1	Osteoarthritis; localized || id:ukb-saige-740.1	CD24 on unswitched memory B cell || id:ebi-a-GCST90001772	Inverse variance weighted	2	-0.0240614	0.0294117024135119	0.413307	-0.0817083	0.0335855842207701	0.976225814016814	0.921540742841113	1.03415594736988	1
ebi-a-GCST90001772	ukb-saige-740.1	Osteoarthritis; localized || id:ukb-saige-740.1	CD24 on unswitched memory B cell || id:ebi-a-GCST90001772	Bayesian Weighted Mendelian Randomization	2	-0.0241525	0.0297498041710527	0.416874	-0.0824622	0.0341570711839039	0.976136793621244	0.92084628094658	1.03474712292012	1
ebi-a-GCST90001773	ieu-a-1170	Knee and hip osteoarthritis || id:ieu-a-1170	CD24 on switched memory B cell || id:ebi-a-GCST90001773	Wald ratio	1	0.0582231129315389	0.118295494441194	0.622589	-0.173636	0.290082282036279	1.05995145820752	0.840602774184573	1.33653745652468	1
ebi-a-GCST90001773	ukb-saige-740.1	Osteoarthritis; localized || id:ukb-saige-740.1	CD24 on switched memory B cell || id:ebi-a-GCST90001773	Inverse variance weighted	2	-0.0283056	0.0300162469211658	0.345677	-0.0871374	0.0305262650376529	0.972091270802134	0.916551131869784	1.03099696886737	1
ebi-a-GCST90001773	ukb-saige-740.1	Osteoarthritis; localized || id:ukb-saige-740.1	CD24 on switched memory B cell || id:ebi-a-GCST90001773	Bayesian Weighted Mendelian Randomization	2	-0.0284221	0.0303862244122944	0.349602	-0.0879791	0.0311348824207855	0.971977991344914	0.915780000505183	1.03162464253176	1
ebi-a-GCST90001774	ukb-saige-740.1	Osteoarthritis; localized || id:ukb-saige-740.1	CD24 on transitional B cell || id:ebi-a-GCST90001774	Wald ratio	1	-0.0470958	0.0560663825969948	0.400908	-0.156986	0.0627943485086342	0.953996037237596	0.854716134784516	1.06480783739327	1
ebi-a-GCST90001775	ukb-saige-740.1	Osteoarthritis; localized || id:ukb-saige-740.1	CD25 on B cell || id:ebi-a-GCST90001775	Inverse variance weighted	3	-0.0186779	0.0362602830035411	0.606478	-0.0897481	0.0523922215449282	0.981495418490015	0.914161444661651	1.05378898020955	1
ebi-a-GCST90001775	ukb-saige-740.1	Osteoarthritis; localized || id:ukb-saige-740.1	CD25 on B cell || id:ebi-a-GCST90001775	Bayesian Weighted Mendelian Randomization	3	-0.0190741	0.0368666398805488	0.60489	-0.0913327	0.0531845200353458	0.981106665304308	0.912713992859642	1.05462422646627	1
ebi-a-GCST90001775	ukb-saige-740.1	Osteoarthritis; localized || id:ukb-saige-740.1	CD25 on B cell || id:ebi-a-GCST90001775	MR Egger	3	-0.0393648	0.0787128899461943	0.704779	-0.193642	0.114912469487184	0.961399931466527	0.823952777889076	1.12177524371218	0.998524067790455
ebi-a-GCST90001775	ukb-saige-740.1	Osteoarthritis; localized || id:ukb-saige-740.1	CD25 on B cell || id:ebi-a-GCST90001775	Weighted median	3	-0.0141454	0.0415114846723516	0.733286	-0.0955079	0.0672171460960571	0.985954211733701	0.908911205022671	1.06952769672498	0.974299104969666
ebi-a-GCST90001775	ukb-saige-740.1	Osteoarthritis; localized || id:ukb-saige-740.1	CD25 on B cell || id:ebi-a-GCST90001775	Weighted mode	3	-0.0465818	0.045785693684008	0.416016	-0.136322	0.0431581999737741	0.954486518898946	0.872561867362517	1.04410305886233	0.974498079964075
ebi-a-GCST90001777	ieu-a-1169	Hip osteoarthritis || id:ieu-a-1169	CD25 on CD24+ CD27+ B cell || id:ebi-a-GCST90001777	Inverse variance weighted	2	-0.132849	0.0720578305505604	0.0652346	-0.274083	0.00838412725066537	0.875597104137284	0.760269298367933	1.00841937247684	1
ebi-a-GCST90001777	ieu-a-1169	Hip osteoarthritis || id:ieu-a-1169	CD25 on CD24+ CD27+ B cell || id:ebi-a-GCST90001777	Bayesian Weighted Mendelian Randomization	2	-0.133307	0.0729959132519849	0.0678167	-0.276379	0.00976519365206169	0.87519654383554	0.758525557252064	1.00981302873508	1
ebi-a-GCST90001777	ieu-a-1170	Knee and hip osteoarthritis || id:ieu-a-1170	CD25 on CD24+ CD27+ B cell || id:ebi-a-GCST90001777	Inverse variance weighted	2	-0.0680454	0.0552104068723433	0.217772	-0.176258	0.0401669472503205	0.934218012198592	0.838401775503438	1.04098454919447	1
ebi-a-GCST90001777	ieu-a-1170	Knee and hip osteoarthritis || id:ieu-a-1170	CD25 on CD24+ CD27+ B cell || id:ebi-a-GCST90001777	Bayesian Weighted Mendelian Randomization	2	-0.0686964	0.0560781810381093	0.220571	-0.17861	0.0412168737684581	0.933610117425324	0.8364323822934	1.04207808044091	1
ebi-a-GCST90001777	ieu-a-1171	Knee osteoarthritis || id:ieu-a-1171	CD25 on CD24+ CD27+ B cell || id:ebi-a-GCST90001777	Inverse variance weighted	2	-0.00740768	0.0841204333578938	0.929829	-0.172284	0.157468365089166	0.992619684978312	0.841740309212929	1.17054372734953	1
ebi-a-GCST90001777	ieu-a-1171	Knee osteoarthritis || id:ieu-a-1171	CD25 on CD24+ CD27+ B cell || id:ebi-a-GCST90001777	Bayesian Weighted Mendelian Randomization	2	-0.00963152	0.0833624342343287	0.908019	-0.173022	0.153758849371624	0.990414712822315	0.841119200165961	1.16620962068321	1
ebi-a-GCST90001778	ieu-a-1169	Hip osteoarthritis || id:ieu-a-1169	CD25 on IgD+ CD24+ B cell || id:ebi-a-GCST90001778	Inverse variance weighted	2	-0.144376	0.0781814611583204	0.0647946	-0.297611	0.00886007659615429	0.865562592706117	0.74258996464173	1.00889944325277	1
ebi-a-GCST90001778	ieu-a-1169	Hip osteoarthritis || id:ieu-a-1169	CD25 on IgD+ CD24+ B cell || id:ebi-a-GCST90001778	Bayesian Weighted Mendelian Randomization	2	-0.144973	0.0794006860817284	0.0678738	-0.300599	0.0106521051942049	0.865045441827074	0.740374911257797	1.01070904084869	1
ebi-a-GCST90001778	ieu-a-1170	Knee and hip osteoarthritis || id:ieu-a-1170	CD25 on IgD+ CD24+ B cell || id:ebi-a-GCST90001778	Inverse variance weighted	2	-0.0753612	0.0577861867369279	0.192186	-0.188622	0.03789969436635	0.927408416551862	0.828099338596857	1.03862704750927	1
ebi-a-GCST90001778	ieu-a-1170	Knee and hip osteoarthritis || id:ieu-a-1170	CD25 on IgD+ CD24+ B cell || id:ebi-a-GCST90001778	Bayesian Weighted Mendelian Randomization	2	-0.0760148	0.0592070200681524	0.199183	-0.192061	0.0400309692989126	0.926802499016926	0.825256898195037	1.04084300787149	1
ebi-a-GCST90001778	ieu-a-1171	Knee osteoarthritis || id:ieu-a-1171	CD25 on IgD+ CD24+ B cell || id:ebi-a-GCST90001778	Inverse variance weighted	2	-0.0106383	0.0910043184226118	0.906941	-0.189007	0.167730212210559	0.98941813417707	0.827780947294191	1.18261751184099	1
ebi-a-GCST90001778	ieu-a-1171	Knee osteoarthritis || id:ieu-a-1171	CD25 on IgD+ CD24+ B cell || id:ebi-a-GCST90001778	Bayesian Weighted Mendelian Randomization	2	-0.012914	0.0902566713714991	0.886226	-0.189817	0.163989064474248	0.987169016638802	0.827110409104316	1.17820143077019	1
ebi-a-GCST90001779	ukb-saige-740.1	Osteoarthritis; localized || id:ukb-saige-740.1	CD25 on IgD+ CD24- B cell || id:ebi-a-GCST90001779	Inverse variance weighted	4	-0.0218819	0.0301074497258859	0.467352	-0.0808925	0.0371286670132734	0.978355738341465	0.922292799473616	1.03782654628982	1
ebi-a-GCST90001779	ukb-saige-740.1	Osteoarthritis; localized || id:ukb-saige-740.1	CD25 on IgD+ CD24- B cell || id:ebi-a-GCST90001779	Bayesian Weighted Mendelian Randomization	4	-0.0219474	0.0304629534698948	0.47124	-0.0816548	0.0377599772470121	0.978291680537711	0.921590036346449	1.03848194366711	1
ebi-a-GCST90001779	ukb-saige-740.1	Osteoarthritis; localized || id:ukb-saige-740.1	CD25 on IgD+ CD24- B cell || id:ebi-a-GCST90001779	MR Egger	4	-0.0540881	0.063308683407819	0.482914	-0.178173	0.0699969403179889	0.947348661151387	0.836797562430938	1.07250489972525	0.998524067790455
ebi-a-GCST90001779	ukb-saige-740.1	Osteoarthritis; localized || id:ukb-saige-740.1	CD25 on IgD+ CD24- B cell || id:ebi-a-GCST90001779	Weighted median	4	-0.0310103	0.0331917643761851	0.35016	-0.0960662	0.0340455099247387	0.96946554074983	0.908403871900491	1.03463169166711	0.974299104969666
ebi-a-GCST90001779	ukb-saige-740.1	Osteoarthritis; localized || id:ukb-saige-740.1	CD25 on IgD+ CD24- B cell || id:ebi-a-GCST90001779	Weighted mode	4	-0.0415875	0.0400071172659164	0.374988	-0.120001	0.0368264462885536	0.959265392539105	0.886919147673396	1.03751294099026	0.974498079964075
ebi-a-GCST90001780	ukb-saige-740.1	Osteoarthritis; localized || id:ukb-saige-740.1	CD25 on IgD+ CD38- B cell || id:ebi-a-GCST90001780	Inverse variance weighted	2	-0.0418918	0.0474442211759781	0.377252	-0.134883	0.0510988246110911	0.95897348900792	0.873818559766827	1.0524268938227	1
ebi-a-GCST90001780	ukb-saige-740.1	Osteoarthritis; localized || id:ukb-saige-740.1	CD25 on IgD+ CD38- B cell || id:ebi-a-GCST90001780	Bayesian Weighted Mendelian Randomization	2	-0.0422137	0.0483633640398275	0.382748	-0.137006	0.0525785012202753	0.958664899377342	0.871965093891037	1.0539852979631	1
ebi-a-GCST90001781	ieu-a-1169	Hip osteoarthritis || id:ieu-a-1169	CD25 on IgD+ CD38- naive B cell || id:ebi-a-GCST90001781	Wald ratio	1	0.0905468678555098	0.160352537722908	0.572296	-0.223744	0.40483784179241	1.09477281609344	0.799519700423792	1.49905939556195	1
ebi-a-GCST90001781	ieu-a-1170	Knee and hip osteoarthritis || id:ieu-a-1170	CD25 on IgD+ CD38- naive B cell || id:ebi-a-GCST90001781	Wald ratio	1	-0.0459547	0.129085505258345	0.721839	-0.298962	0.207052857796068	0.955085195521437	0.741587349831204	1.23004758766698	1
ebi-a-GCST90001781	ieu-a-1171	Knee osteoarthritis || id:ieu-a-1171	CD25 on IgD+ CD38- naive B cell || id:ebi-a-GCST90001781	Wald ratio	1	0.0454976223136717	0.161945587562872	0.778753	-0.271916	0.3629109739369	1.04654851624689	0.761918465779686	1.43750787787741	1
ebi-a-GCST90001782	ukb-saige-740.1	Osteoarthritis; localized || id:ukb-saige-740.1	CD25 on IgD+ CD38- unswitched memory B cell || id:ebi-a-GCST90001782	Wald ratio	1	-0.00595107	0.0308573947542429	0.847071	-0.0664316	0.0545294247299978	0.994066603548526	0.93572695228501	1.05604354975288	1
ebi-a-GCST90001784	ukb-saige-740.1	Osteoarthritis; localized || id:ukb-saige-740.1	CD25 on IgD+ CD38dim B cell || id:ebi-a-GCST90001784	Inverse variance weighted	3	-0.0422723	0.0325489629762555	0.194037	-0.106068	0.0215236522920676	0.958608701362135	0.899363235141807	1.02175695694555	1
ebi-a-GCST90001784	ukb-saige-740.1	Osteoarthritis; localized || id:ukb-saige-740.1	CD25 on IgD+ CD38dim B cell || id:ebi-a-GCST90001784	Bayesian Weighted Mendelian Randomization	3	-0.0429487	0.0333971394735443	0.198443	-0.108407	0.0225097042499922	0.957960542606204	0.897262262322311	1.02276495928314	1
ebi-a-GCST90001784	ukb-saige-740.1	Osteoarthritis; localized || id:ukb-saige-740.1	CD25 on IgD+ CD38dim B cell || id:ebi-a-GCST90001784	MR Egger	3	-0.0377994	0.0524255972635517	0.602311	-0.140554	0.0649547497712546	0.962906060387065	0.868877099256338	1.06711073628676	0.998524067790455
ebi-a-GCST90001784	ukb-saige-740.1	Osteoarthritis; localized || id:ukb-saige-740.1	CD25 on IgD+ CD38dim B cell || id:ebi-a-GCST90001784	Weighted median	3	-0.0437517	0.035401592930559	0.216507	-0.113139	0.0256353894157464	0.957191567315509	0.893026650405264	1.02596680191362	0.974299104969666
ebi-a-GCST90001784	ukb-saige-740.1	Osteoarthritis; localized || id:ukb-saige-740.1	CD25 on IgD+ CD38dim B cell || id:ebi-a-GCST90001784	Weighted mode	3	-0.0464103	0.0429649662392892	0.393	-0.130622	0.0378010566806915	0.95465021066679	0.877549766774546	1.03852460479348	0.974498079964075
ebi-a-GCST90001785	ukb-saige-740.1	Osteoarthritis; localized || id:ukb-saige-740.1	CD25 on IgD- CD24- B cell || id:ebi-a-GCST90001785	Inverse variance weighted	2	-0.0540867	0.0594209202588133	0.362701	-0.170552	0.062378292107922	0.947349956710287	0.843199482181269	1.06436490942489	1
ebi-a-GCST90001785	ukb-saige-740.1	Osteoarthritis; localized || id:ukb-saige-740.1	CD25 on IgD- CD24- B cell || id:ebi-a-GCST90001785	Bayesian Weighted Mendelian Randomization	2	-0.054599	0.0606589029761546	0.368068	-0.17349	0.0642924984920011	0.946864810679111	0.84072522109782	1.06640427478989	1
ebi-a-GCST90001786	ukb-saige-740.1	Osteoarthritis; localized || id:ukb-saige-740.1	CD25 on IgD- CD27- B cell || id:ebi-a-GCST90001786	Inverse variance weighted	2	-0.0105452	0.053308538874665	0.84319	-0.11503	0.0939394965913794	0.989510166508246	0.891339424896439	1.09849328131866	1
ebi-a-GCST90001786	ukb-saige-740.1	Osteoarthritis; localized || id:ukb-saige-740.1	CD25 on IgD- CD27- B cell || id:ebi-a-GCST90001786	Bayesian Weighted Mendelian Randomization	2	-0.019997	0.0568665114583498	0.725102	-0.131455	0.0914613203832627	0.980201572665103	0.87681837639048	1.09577439173933	1
ebi-a-GCST90001787	ieu-a-1169	Hip osteoarthritis || id:ieu-a-1169	CD25 on IgD- CD38- B cell || id:ebi-a-GCST90001787	Inverse variance weighted	2	-0.140259	0.0914206388047404	0.124977	-0.319443	0.0389254845520566	0.869133129014307	0.726553309917158	1.03969300757343	1
ebi-a-GCST90001787	ieu-a-1169	Hip osteoarthritis || id:ieu-a-1169	CD25 on IgD- CD38- B cell || id:ebi-a-GCST90001787	Bayesian Weighted Mendelian Randomization	2	-0.141538	0.0932707211138014	0.12914	-0.324349	0.0412722936094307	0.868021912544394	0.722997920414016	1.04213583384274	1
ebi-a-GCST90001787	ieu-a-1170	Knee and hip osteoarthritis || id:ieu-a-1170	CD25 on IgD- CD38- B cell || id:ebi-a-GCST90001787	Inverse variance weighted	2	-0.0662576	0.0701140967116282	0.344661	-0.203681	0.0711660627127955	0.935889779070321	0.815722384973976	1.07375952248293	1
ebi-a-GCST90001787	ieu-a-1170	Knee and hip osteoarthritis || id:ieu-a-1170	CD25 on IgD- CD38- B cell || id:ebi-a-GCST90001787	Bayesian Weighted Mendelian Randomization	2	-0.0666825	0.0711785390529767	0.348844	-0.206192	0.0728274269700541	0.935492163998754	0.813676472336398	1.07554491085403	1
ebi-a-GCST90001787	ieu-a-1171	Knee osteoarthritis || id:ieu-a-1171	CD25 on IgD- CD38- B cell || id:ebi-a-GCST90001787	Inverse variance weighted	2	0.0360507793448233	0.0884287062226557	0.683507	-0.137269	0.209371043541228	1.03670848853217	0.871735275024441	1.23290237413476	1
ebi-a-GCST90001787	ieu-a-1171	Knee osteoarthritis || id:ieu-a-1171	CD25 on IgD- CD38- B cell || id:ebi-a-GCST90001787	Bayesian Weighted Mendelian Randomization	2	0.0365175472727796	0.0897590172386578	0.684126	-0.13941	0.212445221060549	1.03719250375786	0.869871198047502	1.2366983666848	1
ebi-a-GCST90001789	ukb-saige-740.1	Osteoarthritis; localized || id:ukb-saige-740.1	CD25 on IgD- CD38dim B cell || id:ebi-a-GCST90001789	Inverse variance weighted	3	-0.0334813	0.0308439197756752	0.277697	-0.0939354	0.0269727538193493	0.967072967339294	0.910341557754449	1.02733981129607	1
ebi-a-GCST90001789	ukb-saige-740.1	Osteoarthritis; localized || id:ukb-saige-740.1	CD25 on IgD- CD38dim B cell || id:ebi-a-GCST90001789	Bayesian Weighted Mendelian Randomization	3	-0.0335187	0.0311358491210167	0.281689	-0.094545	0.0275075146933007	0.967036779524198	0.909786780688527	1.02788933935136	1
ebi-a-GCST90001789	ukb-saige-740.1	Osteoarthritis; localized || id:ukb-saige-740.1	CD25 on IgD- CD38dim B cell || id:ebi-a-GCST90001789	MR Egger	3	-0.0593972	0.0703442595380271	0.553588	-0.197272	0.0784775260633813	0.942332379056884	0.820967323375802	1.08163904620175	0.998524067790455
ebi-a-GCST90001789	ukb-saige-740.1	Osteoarthritis; localized || id:ukb-saige-740.1	CD25 on IgD- CD38dim B cell || id:ebi-a-GCST90001789	Weighted median	3	-0.0366913	0.0331779611700163	0.268773	-0.10172	0.0283375267047937	0.963973690083597	0.903282362105761	1.02874285401422	0.974299104969666
ebi-a-GCST90001789	ukb-saige-740.1	Osteoarthritis; localized || id:ukb-saige-740.1	CD25 on IgD- CD38dim B cell || id:ebi-a-GCST90001789	Weighted mode	3	-0.0387791	0.0392049008418555	0.426853	-0.115621	0.0380625108465595	0.961963188343792	0.890813044209435	1.03879616687673	0.974498079964075
ebi-a-GCST90001790	ieu-a-1169	Hip osteoarthritis || id:ieu-a-1169	CD25 on memory B cell || id:ebi-a-GCST90001790	Inverse variance weighted	2	-0.133778	0.0725888216811742	0.0653354	-0.276052	0.00849605489271799	0.874784214006516	0.758773377835319	1.00853224879627	1
ebi-a-GCST90001790	ieu-a-1169	Hip osteoarthritis || id:ieu-a-1169	CD25 on memory B cell || id:ebi-a-GCST90001790	Bayesian Weighted Mendelian Randomization	2	-0.134249	0.0735514678276733	0.0679651	-0.27841	0.00991195145915147	0.874372383943254	0.756986543020968	1.00996123755589	1
ebi-a-GCST90001790	ieu-a-1170	Knee and hip osteoarthritis || id:ieu-a-1170	CD25 on memory B cell || id:ebi-a-GCST90001790	Inverse variance weighted	2	-0.0682896	0.0559614266530316	0.222352	-0.177974	0.0413948202595002	0.933989973351664	0.836964207525212	1.04226353107838	1
ebi-a-GCST90001790	ieu-a-1170	Knee and hip osteoarthritis || id:ieu-a-1170	CD25 on memory B cell || id:ebi-a-GCST90001790	Bayesian Weighted Mendelian Randomization	2	-0.0689796	0.0568168355345598	0.224721	-0.180341	0.0423813522388117	0.933345677754458	0.834985730869229	1.04329226473855	1
ebi-a-GCST90001790	ieu-a-1171	Knee osteoarthritis || id:ieu-a-1171	CD25 on memory B cell || id:ebi-a-GCST90001790	Inverse variance weighted	2	-0.00703476	0.0847765962557348	0.933867	-0.173197	0.159127370708184	0.992989928036101	0.840972022409481	1.17248727770522	1
ebi-a-GCST90001790	ieu-a-1171	Knee osteoarthritis || id:ieu-a-1171	CD25 on memory B cell || id:ebi-a-GCST90001790	Bayesian Weighted Mendelian Randomization	2	-0.00929694	0.0840427604247663	0.911916	-0.174021	0.155426870671552	0.990746143166967	0.840279461516083	1.16815650644275	1
ebi-a-GCST90001791	ieu-a-1170	Knee and hip osteoarthritis || id:ieu-a-1170	CD25 on naive-mature B cell || id:ebi-a-GCST90001791	Wald ratio	1	0.127738980121003	0.255544943820225	0.617167	-0.373129	0.628607070008643	1.13625637848391	0.688576325175999	1.87499701985162	1
ebi-a-GCST90001791	ieu-a-1171	Knee osteoarthritis || id:ieu-a-1171	CD25 on naive-mature B cell || id:ebi-a-GCST90001791	Wald ratio	1	0.292388072601556	0.329067415730337	0.374253	-0.352584	0.937360207433016	1.33962278767883	0.702869482551214	2.55323251018747	1
ebi-a-GCST90001791	ukb-saige-740.1	Osteoarthritis; localized || id:ukb-saige-740.1	CD25 on naive-mature B cell || id:ebi-a-GCST90001791	Inverse variance weighted	4	-0.0203542	0.0311554432492954	0.513555	-0.0814189	0.0407104223188686	0.979851502902259	0.921807451379547	1.04155045210683	1
ebi-a-GCST90001791	ukb-saige-740.1	Osteoarthritis; localized || id:ukb-saige-740.1	CD25 on naive-mature B cell || id:ebi-a-GCST90001791	Bayesian Weighted Mendelian Randomization	4	-0.0206868	0.0316163569130477	0.512914	-0.0826549	0.0412812509233897	0.979525695532479	0.920668844511078	1.0421451686224	1
ebi-a-GCST90001791	ukb-saige-740.1	Osteoarthritis; localized || id:ukb-saige-740.1	CD25 on naive-mature B cell || id:ebi-a-GCST90001791	MR Egger	4	-0.0361449	0.070609404915226	0.659643	-0.174539	0.102249521794429	0.964500515811786	0.839843809526987	1.10765982251526	0.998524067790455
ebi-a-GCST90001791	ukb-saige-740.1	Osteoarthritis; localized || id:ukb-saige-740.1	CD25 on naive-mature B cell || id:ebi-a-GCST90001791	Weighted median	4	-0.0191474	0.0374722925552236	0.609369	-0.0925931	0.0542983219809179	0.981034775094004	0.91156437242836	1.05579952338405	0.974299104969666
ebi-a-GCST90001791	ukb-saige-740.1	Osteoarthritis; localized || id:ukb-saige-740.1	CD25 on naive-mature B cell || id:ebi-a-GCST90001791	Weighted mode	4	-0.0359535	0.0400104463156329	0.435089	-0.114374	0.0424670076842913	0.964685182043276	0.891924365646762	1.0433816322296	0.974498079964075
ebi-a-GCST90001792	ieu-a-1169	Hip osteoarthritis || id:ieu-a-1169	CD25 on unswitched memory B cell || id:ebi-a-GCST90001792	Inverse variance weighted	2	-0.14091	0.0763273279656103	0.0648737	-0.290512	0.00869157814012159	0.868567492566198	0.747880893118824	1.00872945957569	1
ebi-a-GCST90001792	ieu-a-1169	Hip osteoarthritis || id:ieu-a-1169	CD25 on unswitched memory B cell || id:ebi-a-GCST90001792	Bayesian Weighted Mendelian Randomization	2	-0.14146	0.0774508530115555	0.0677835	-0.293263	0.0103440722025981	0.86809024598278	0.745825760104442	1.01039775706449	1
ebi-a-GCST90001792	ieu-a-1170	Knee and hip osteoarthritis || id:ieu-a-1170	CD25 on unswitched memory B cell || id:ebi-a-GCST90001792	Inverse variance weighted	2	-0.0732448	0.0568796517774167	0.197845	-0.184729	0.0382393069598221	0.929373281813798	0.83132960348374	1.03897983823722	1
ebi-a-GCST90001792	ieu-a-1170	Knee and hip osteoarthritis || id:ieu-a-1170	CD25 on unswitched memory B cell || id:ebi-a-GCST90001792	Bayesian Weighted Mendelian Randomization	2	-0.0738805	0.0581209574505059	0.203675	-0.187798	0.0400365767798618	0.928782676904071	0.828782455360602	1.04084884439519	1
ebi-a-GCST90001792	ieu-a-1171	Knee osteoarthritis || id:ieu-a-1171	CD25 on unswitched memory B cell || id:ebi-a-GCST90001792	Inverse variance weighted	2	-0.00981966	0.0889101000335853	0.912057	-0.184083	0.164444134050179	0.990228393440658	0.831866374957814	1.17873771641003	1
ebi-a-GCST90001792	ieu-a-1171	Knee osteoarthritis || id:ieu-a-1171	CD25 on unswitched memory B cell || id:ebi-a-GCST90001792	Bayesian Weighted Mendelian Randomization	2	-0.0120708	0.0881437583360844	0.891074	-0.184833	0.16069093098333	0.988001724929833	0.831243420946584	1.17432196618499	1
ebi-a-GCST90001793	ieu-a-1169	Hip osteoarthritis || id:ieu-a-1169	CD25 on switched memory B cell || id:ebi-a-GCST90001793	Wald ratio	1	-0.0427854	0.120183056619838	0.721839	-0.278344	0.192773350361856	0.95811694099831	0.757036180889888	1.21260792522343	1
ebi-a-GCST90001793	ieu-a-1170	Knee and hip osteoarthritis || id:ieu-a-1170	CD25 on switched memory B cell || id:ebi-a-GCST90001793	Wald ratio	1	-0.0427854	0.0982984248616433	0.663373	-0.23545	0.149879472115794	0.95811694099831	0.790214893563656	1.16169421774384	1
ebi-a-GCST90001793	ukb-saige-740.1	Osteoarthritis; localized || id:ukb-saige-740.1	CD25 on switched memory B cell || id:ebi-a-GCST90001793	Inverse variance weighted	3	-0.0555434	0.0326169000245361	0.0885862	-0.119473	0.00838570007088816	0.945970944957792	0.887388368047715	1.00842095854047	1
ebi-a-GCST90001793	ukb-saige-740.1	Osteoarthritis; localized || id:ukb-saige-740.1	CD25 on switched memory B cell || id:ebi-a-GCST90001793	Bayesian Weighted Mendelian Randomization	3	-0.0524186	0.0337979162115855	0.120915	-0.118663	0.0138252936119139	0.948931539910182	0.888107452771247	1.01392130493499	1
ebi-a-GCST90001793	ukb-saige-740.1	Osteoarthritis; localized || id:ukb-saige-740.1	CD25 on switched memory B cell || id:ebi-a-GCST90001793	MR Egger	3	-0.0349545	0.132643304237995	0.835965	-0.294935	0.225026349376783	0.965649326298908	0.74457968335044	1.25235571454971	0.998524067790455
ebi-a-GCST90001793	ukb-saige-740.1	Osteoarthritis; localized || id:ukb-saige-740.1	CD25 on switched memory B cell || id:ebi-a-GCST90001793	Weighted median	3	-0.0529324	0.034982695307346	0.130253	-0.121499	0.0156336427774432	0.948444087176693	0.885592361520714	1.01575648750601	0.974299104969666
ebi-a-GCST90001793	ukb-saige-740.1	Osteoarthritis; localized || id:ukb-saige-740.1	CD25 on switched memory B cell || id:ebi-a-GCST90001793	Weighted mode	3	-0.048374	0.0463398352444877	0.406121	-0.1392	0.0424520450678556	0.952777351193418	0.870053905341308	1.04336602062724	0.974498079964075
ebi-a-GCST90001794	ukb-saige-740.1	Osteoarthritis; localized || id:ukb-saige-740.1	CD25 on IgD+ B cell || id:ebi-a-GCST90001794	Inverse variance weighted	2	-0.0253511	0.0422546855239418	0.548533	-0.10817	0.0574680983516582	0.974967555181138	0.897474771376058	1.05915148143767	1
ebi-a-GCST90001794	ukb-saige-740.1	Osteoarthritis; localized || id:ukb-saige-740.1	CD25 on IgD+ B cell || id:ebi-a-GCST90001794	Bayesian Weighted Mendelian Randomization	2	-0.0259518	0.0430774575773465	0.546877	-0.110384	0.05847997310872	0.974382011069618	0.89549050496255	1.06022375249616	1
ebi-a-GCST90001795	ukb-saige-740.1	Osteoarthritis; localized || id:ukb-saige-740.1	CD25 on transitional B cell || id:ebi-a-GCST90001795	Inverse variance weighted	2	-0.00543602	0.0539279108232153	0.919708	-0.111135	0.10026268616173	0.99457872936347	0.894818187085102	1.10546126931613	1
ebi-a-GCST90001795	ukb-saige-740.1	Osteoarthritis; localized || id:ukb-saige-740.1	CD25 on transitional B cell || id:ebi-a-GCST90001795	Bayesian Weighted Mendelian Randomization	2	-0.0138086	0.0580301554790723	0.811916	-0.127548	0.0999305321275121	0.986286328409248	0.880251446777029	1.10509414686983	1
ebi-a-GCST90001799	ieu-a-1170	Knee and hip osteoarthritis || id:ieu-a-1170	CD27 on T cell || id:ebi-a-GCST90001799	Wald ratio	1	-0.0319741	0.0649636889460154	0.622589	-0.159303	0.0953547622107969	0.968531697598022	0.852738026813856	1.10004904174031	1
ebi-a-GCST90001799	ieu-a-1171	Knee osteoarthritis || id:ieu-a-1171	CD27 on T cell || id:ebi-a-GCST90001799	Wald ratio	1	-0.0949833	0.0956115038560411	0.320501	-0.282382	0.0924152570694087	0.909388129772752	0.753985729122696	1.09682018986464	1
ebi-a-GCST90001799	ukb-saige-740.1	Osteoarthritis; localized || id:ukb-saige-740.1	CD27 on T cell || id:ebi-a-GCST90001799	Wald ratio	1	0.0353470437017995	0.0353470437017995	0.317311	-0.0339332	0.104627249357326	1.03597917646891	0.966636110547502	1.11029666941504	1
ebi-a-GCST90001800	ieu-a-1169	Hip osteoarthritis || id:ieu-a-1169	CD27 on IgD+ CD24+ B cell || id:ebi-a-GCST90001800	Wald ratio	1	-0.05169	0.169963116883117	0.761033	-0.384818	0.281437683116883	0.949623179746039	0.680574669798754	1.32503342179578	1
ebi-a-GCST90001800	ieu-a-1170	Knee and hip osteoarthritis || id:ieu-a-1170	CD27 on IgD+ CD24+ B cell || id:ebi-a-GCST90001800	Wald ratio	1	0.104949090909091	0.121169350649351	0.386416	-0.132543	0.342441018181818	1.11065406652758	0.875865414413217	1.40838128232368	1
ebi-a-GCST90001800	ieu-a-1171	Knee osteoarthritis || id:ieu-a-1171	CD27 on IgD+ CD24+ B cell || id:ebi-a-GCST90001800	Wald ratio	1	0.15822961038961	0.164152727272727	0.335088	-0.16351	0.479968955844156	1.17143513750878	0.849158232350814	1.61602423330603	1
ebi-a-GCST90001801	ieu-a-1169	Hip osteoarthritis || id:ieu-a-1169	CD27 on IgD+ CD38- unswitched memory B cell || id:ebi-a-GCST90001801	Inverse variance weighted	2	0.179939231486898	0.102771890462378	0.07997	-0.0214937	0.381372136793159	1.1971446122133	0.978735669108202	1.4642924211163	1
ebi-a-GCST90001801	ieu-a-1169	Hip osteoarthritis || id:ieu-a-1169	CD27 on IgD+ CD38- unswitched memory B cell || id:ebi-a-GCST90001801	Bayesian Weighted Mendelian Randomization	2	0.179021054245211	0.106300982867566	0.0921631	-0.0293289	0.38737098066564	1.19605	0.971097045147836	1.4731028826045	1
ebi-a-GCST90001801	ieu-a-1170	Knee and hip osteoarthritis || id:ieu-a-1170	CD27 on IgD+ CD38- unswitched memory B cell || id:ebi-a-GCST90001801	Inverse variance weighted	2	0.0943767786826653	0.0401612635237015	0.0187762	0.0156607021762104	0.17309285518912	1.09897373779783	1.01578397363773	1.18897650259647	0.697643028917994
ebi-a-GCST90001801	ieu-a-1170	Knee and hip osteoarthritis || id:ieu-a-1170	CD27 on IgD+ CD38- unswitched memory B cell || id:ebi-a-GCST90001801	Bayesian Weighted Mendelian Randomization	2	0.0947080510143686	0.0408827829506341	0.0205269	0.0145777964311257	0.174838305597611	1.09933785769852	1.01468457071922	1.19105361433904	1
ebi-a-GCST90001801	ieu-a-1171	Knee osteoarthritis || id:ieu-a-1171	CD27 on IgD+ CD38- unswitched memory B cell || id:ebi-a-GCST90001801	Inverse variance weighted	2	0.022843800504576	0.0512243887992402	0.655629	-0.077556	0.123243602551087	1.02310671831238	0.925375200507445	1.13115994083473	1
ebi-a-GCST90001801	ieu-a-1171	Knee osteoarthritis || id:ieu-a-1171	CD27 on IgD+ CD38- unswitched memory B cell || id:ebi-a-GCST90001801	Bayesian Weighted Mendelian Randomization	2	0.0228028272776442	0.0516064451726101	0.65859	-0.0783458	0.12395145981596	1.02306479918742	0.924644624276747	1.13196092407404	1
ebi-a-GCST90001802	ieu-a-1171	Knee osteoarthritis || id:ieu-a-1171	CD27 on IgD- CD38- B cell || id:ebi-a-GCST90001802	Inverse variance weighted	3	-0.0248573	0.0870922972564825	0.775327	-0.195558	0.145843598043768	0.975449094216991	0.822375473995978	1.15701521445592	1
ebi-a-GCST90001802	ieu-a-1171	Knee osteoarthritis || id:ieu-a-1171	CD27 on IgD- CD38- B cell || id:ebi-a-GCST90001802	Bayesian Weighted Mendelian Randomization	3	-0.0251396	0.0889049961677673	0.777354	-0.199393	0.149114180499179	0.975173756575682	0.819227542145918	1.16080552299662	1
ebi-a-GCST90001802	ieu-a-1171	Knee osteoarthritis || id:ieu-a-1171	CD27 on IgD- CD38- B cell || id:ebi-a-GCST90001802	MR Egger	3	-0.537953	0.521450044777956	0.490084	-1.55999	0.484089273870231	0.583942468473444	0.210137142548769	1.62269650358324	0.998524067790455
ebi-a-GCST90001802	ieu-a-1171	Knee osteoarthritis || id:ieu-a-1171	CD27 on IgD- CD38- B cell || id:ebi-a-GCST90001802	Weighted median	3	-0.030697	0.101312256620677	0.761895	-0.229269	0.167875051269486	0.9697693961201	0.795114623129558	1.18278881345376	0.974299104969666
ebi-a-GCST90001802	ieu-a-1171	Knee osteoarthritis || id:ieu-a-1171	CD27 on IgD- CD38- B cell || id:ebi-a-GCST90001802	Weighted mode	3	-0.0413392	0.131097253626497	0.782371	-0.29829	0.215611375914778	0.959503571593053	0.7420862087228	1.24062015043285	0.974498079964075
ebi-a-GCST90001803	ieu-a-1169	Hip osteoarthritis || id:ieu-a-1169	CD27 on IgD- CD38+ B cell || id:ebi-a-GCST90001803	Wald ratio	1	-0.181413	0.17159797498511	0.290422	-0.517745	0.154919285288862	0.834091020171626	0.595862837602934	1.16756371773355	1
ebi-a-GCST90001803	ieu-a-1170	Knee and hip osteoarthritis || id:ieu-a-1170	CD27 on IgD- CD38+ B cell || id:ebi-a-GCST90001803	Wald ratio	1	-0.0598588	0.122843954734961	0.626063	-0.300633	0.180915306730197	0.941897478163177	0.740349434222198	1.19831368589105	1
ebi-a-GCST90001803	ukb-saige-740.1	Osteoarthritis; localized || id:ukb-saige-740.1	CD27 on IgD- CD38+ B cell || id:ebi-a-GCST90001803	Inverse variance weighted	2	-0.0309746	0.0531383021301349	0.559957	-0.135126	0.0731764841965805	0.96950020972318	0.87360612731032	1.07592040310795	1
ebi-a-GCST90001803	ukb-saige-740.1	Osteoarthritis; localized || id:ukb-saige-740.1	CD27 on IgD- CD38+ B cell || id:ebi-a-GCST90001803	Bayesian Weighted Mendelian Randomization	2	-0.0314376	0.054759639848752	0.565899	-0.138767	0.0758912539390738	0.969051384454525	0.870431220600171	1.07884524760697	1
ebi-a-GCST90001804	ieu-a-1169	Hip osteoarthritis || id:ieu-a-1169	CD27 on IgD- CD38dim B cell || id:ebi-a-GCST90001804	Inverse variance weighted	2	0.113611560676857	0.144969314648314	0.43322	-0.170528	0.397751417387552	1.12031686522881	0.84321922953119	1.48847397516529	1
ebi-a-GCST90001804	ieu-a-1169	Hip osteoarthritis || id:ieu-a-1169	CD27 on IgD- CD38dim B cell || id:ebi-a-GCST90001804	Bayesian Weighted Mendelian Randomization	2	0.11769140202581	0.149887393957676	0.432337	-0.176088	0.411470694182855	1.12489691688862	0.838544280331394	1.50903548364248	1
ebi-a-GCST90001804	ieu-a-1170	Knee and hip osteoarthritis || id:ieu-a-1170	CD27 on IgD- CD38dim B cell || id:ebi-a-GCST90001804	Inverse variance weighted	2	0.0433018137000727	0.112617923556379	0.700606	-0.177429	0.264032943870576	1.04425301716103	0.837420189058555	1.30217109415027	1
ebi-a-GCST90001804	ieu-a-1170	Knee and hip osteoarthritis || id:ieu-a-1170	CD27 on IgD- CD38dim B cell || id:ebi-a-GCST90001804	Bayesian Weighted Mendelian Randomization	2	0.0431714286169144	0.115595616198663	0.708799	-0.183396	0.269738836366294	1.04411687102045	0.832438462205425	1.30962238032739	1
ebi-a-GCST90001804	ieu-a-1171	Knee osteoarthritis || id:ieu-a-1171	CD27 on IgD- CD38dim B cell || id:ebi-a-GCST90001804	Inverse variance weighted	2	-0.0302115	0.131934164815962	0.818877	-0.288802	0.228379438528618	0.970240282240501	0.749160159249355	1.25656202303304	1
ebi-a-GCST90001804	ieu-a-1171	Knee osteoarthritis || id:ieu-a-1171	CD27 on IgD- CD38dim B cell || id:ebi-a-GCST90001804	Bayesian Weighted Mendelian Randomization	2	-0.0339879	0.135293505589934	0.801647	-0.299163	0.231187322952291	0.966583153823632	0.741438382756432	1.26009526210698	1
ebi-a-GCST90001804	ukb-saige-740.1	Osteoarthritis; localized || id:ukb-saige-740.1	CD27 on IgD- CD38dim B cell || id:ebi-a-GCST90001804	Inverse variance weighted	8	-0.00124055	0.0160475360407317	0.938381	-0.0326937	0.0302126172497941	0.998760215778219	0.9678349387846	1.03067364965563	1
ebi-a-GCST90001804	ukb-saige-740.1	Osteoarthritis; localized || id:ukb-saige-740.1	CD27 on IgD- CD38dim B cell || id:ebi-a-GCST90001804	Bayesian Weighted Mendelian Randomization	8	-0.00125555	0.0161446798407744	0.938012	-0.0328991	0.0303880203142171	0.998745235702155	0.967636165291549	1.0308544488281	1
ebi-a-GCST90001804	ukb-saige-740.1	Osteoarthritis; localized || id:ukb-saige-740.1	CD27 on IgD- CD38dim B cell || id:ebi-a-GCST90001804	MR Egger	8	-0.000145622	0.0304670853117745	0.996341	-0.0598611	0.0595698648090428	0.999854388200392	0.941895344708668	1.06137991149409	0.998524067790455
ebi-a-GCST90001804	ukb-saige-740.1	Osteoarthritis; localized || id:ukb-saige-740.1	CD27 on IgD- CD38dim B cell || id:ebi-a-GCST90001804	Weighted median	8	-0.0101042	0.0188512655359905	0.591961	-0.0470527	0.0268442664048082	0.98994666202658	0.954037123760142	1.02720781953969	0.974299104969666
ebi-a-GCST90001804	ukb-saige-740.1	Osteoarthritis; localized || id:ukb-saige-740.1	CD27 on IgD- CD38dim B cell || id:ebi-a-GCST90001804	Weighted mode	8	-0.0117186	0.0198399618219425	0.573319	-0.0506049	0.0271677440022306	0.988349813978139	0.950654193789137	1.02754015200536	0.974498079964075
ebi-a-GCST90001805	ieu-a-1169	Hip osteoarthritis || id:ieu-a-1169	CD27 on memory B cell || id:ebi-a-GCST90001805	Wald ratio	1	-0.0467152	0.153605164319249	0.761033	-0.347781	0.254350957746479	0.954359194430641	0.706253326541744	1.28962432850285	1
ebi-a-GCST90001805	ieu-a-1170	Knee and hip osteoarthritis || id:ieu-a-1170	CD27 on memory B cell || id:ebi-a-GCST90001805	Wald ratio	1	0.0948483568075117	0.109507511737089	0.386416	-0.119786	0.309483079812207	1.09949211198971	0.88710993314355	1.36272051429277	1
ebi-a-GCST90001805	ieu-a-1171	Knee osteoarthritis || id:ieu-a-1171	CD27 on memory B cell || id:ebi-a-GCST90001805	Wald ratio	1	0.143000938967136	0.148353990610329	0.335088	-0.147773	0.43377476056338	1.15373088498089	0.862627010274221	1.54307126846821	1
ebi-a-GCST90001806	ieu-a-1169	Hip osteoarthritis || id:ieu-a-1169	CD27 on unswitched memory B cell || id:ebi-a-GCST90001806	Inverse variance weighted	3	0.186899142739487	0.09638477270241	0.0524899	-0.00201501	0.37581329723621	1.20550569491648	0.997987017016058	1.45617523644868	0.986957653351087
ebi-a-GCST90001806	ieu-a-1169	Hip osteoarthritis || id:ieu-a-1169	CD27 on unswitched memory B cell || id:ebi-a-GCST90001806	Bayesian Weighted Mendelian Randomization	3	0.188753496277096	0.0966985740309257	0.0509408	-0.000775709	0.37828270137771	1.20774320259043	0.999224591960792	1.45977556511202	1
ebi-a-GCST90001806	ieu-a-1169	Hip osteoarthritis || id:ieu-a-1169	CD27 on unswitched memory B cell || id:ebi-a-GCST90001806	MR Egger	3	0.433668441622485	0.173324591574113	0.242057	0.093952242137224	0.773384641107746	1.54290721948613	1.09850728230436	2.16708867231964	0.998524067790455
ebi-a-GCST90001806	ieu-a-1169	Hip osteoarthritis || id:ieu-a-1169	CD27 on unswitched memory B cell || id:ebi-a-GCST90001806	Weighted median	3	0.17106887851184	0.0602926988248597	0.00454959	0.052895188815115	0.289242568208565	1.18657247555339	1.05431913489033	1.3354156186185	0.974248972364424
ebi-a-GCST90001806	ieu-a-1169	Hip osteoarthritis || id:ieu-a-1169	CD27 on unswitched memory B cell || id:ebi-a-GCST90001806	Weighted mode	3	0.274305466633854	0.0682981216259717	0.0567665	0.140441148246949	0.408169785020759	1.31561661784467	1.15078135207198	1.5040625067765	0.974498079964075
ebi-a-GCST90001806	ieu-a-1170	Knee and hip osteoarthritis || id:ieu-a-1170	CD27 on unswitched memory B cell || id:ebi-a-GCST90001806	Inverse variance weighted	3	0.0889948711275434	0.0440275383983953	0.043244	0.00270089586668865	0.175288846388398	1.09307505006944	1.00270454657191	1.19159035347867	0.900659323502345
ebi-a-GCST90001806	ieu-a-1170	Knee and hip osteoarthritis || id:ieu-a-1170	CD27 on unswitched memory B cell || id:ebi-a-GCST90001806	Bayesian Weighted Mendelian Randomization	3	0.0897356581286145	0.0447694565200417	0.0450278	0.00198752334933269	0.177483792907896	1.09388508585267	1.00198949978305	1.19420870309518	1
ebi-a-GCST90001806	ieu-a-1170	Knee and hip osteoarthritis || id:ieu-a-1170	CD27 on unswitched memory B cell || id:ebi-a-GCST90001806	MR Egger	3	0.211639030541108	0.103766495672757	0.290208	0.00825669902250512	0.415021362059711	1.23570175397001	1.00829087956995	1.51440309111577	0.998524067790455
ebi-a-GCST90001806	ieu-a-1170	Knee and hip osteoarthritis || id:ieu-a-1170	CD27 on unswitched memory B cell || id:ebi-a-GCST90001806	Weighted median	3	0.103477186411446	0.046510433763366	0.0260936	0.0123167362352484	0.194637636587643	1.10902049233925	1.01239289960449	1.21487068203352	0.974299104969666
ebi-a-GCST90001806	ieu-a-1170	Knee and hip osteoarthritis || id:ieu-a-1170	CD27 on unswitched memory B cell || id:ebi-a-GCST90001806	Weighted mode	3	0.111936171100582	0.0514700151157409	0.161663	0.0110549414737295	0.212817400727434	1.1184414694786	1.01111627313685	1.23715872633389	0.974498079964075
ebi-a-GCST90001806	ieu-a-1171	Knee osteoarthritis || id:ieu-a-1171	CD27 on unswitched memory B cell || id:ebi-a-GCST90001806	Inverse variance weighted	3	0.0087262994894798	0.0571429615575075	0.878627	-0.103274	0.120726504142195	1.00876448463172	0.901879910083101	1.12831628033551	1
ebi-a-GCST90001806	ieu-a-1171	Knee osteoarthritis || id:ieu-a-1171	CD27 on unswitched memory B cell || id:ebi-a-GCST90001806	Bayesian Weighted Mendelian Randomization	3	0.0086665302641409	0.05770270916208	0.880613	-0.104431	0.121763840221818	1.00870419336172	0.900837151472474	1.12948733080377	1
ebi-a-GCST90001806	ieu-a-1171	Knee osteoarthritis || id:ieu-a-1171	CD27 on unswitched memory B cell || id:ebi-a-GCST90001806	MR Egger	3	0.0663683698340169	0.178420914290297	0.773289	-0.283337	0.416073	1.06862029215061	0.753266179077413	1.516	0.998524067790455
ebi-a-GCST90001806	ieu-a-1171	Knee osteoarthritis || id:ieu-a-1171	CD27 on unswitched memory B cell || id:ebi-a-GCST90001806	Weighted median	3	0.0167100706854477	0.06335994214116	0.791986	-0.107475	0.140895557282121	1.01685046482512	0.898098601115147	1.15130439634489	0.974299104969666
ebi-a-GCST90001806	ieu-a-1171	Knee osteoarthritis || id:ieu-a-1171	CD27 on unswitched memory B cell || id:ebi-a-GCST90001806	Weighted mode	3	0.0170766008582895	0.0699968978425696	0.830004	-0.120117	0.154270520629726	1.01722323951416	0.886816390278901	1.16680648931427	0.978812160446256
ebi-a-GCST90001807	ukb-saige-740.1	Osteoarthritis; localized || id:ukb-saige-740.1	CD27 on Plasma Blast-Plasma Cell || id:ebi-a-GCST90001807	Wald ratio	1	0.0741239892183288	0.0741239892183288	0.317311	-0.071159	0.219407008086253	1.07694032620772	0.931313773847187	1.24533803620378	1
ebi-a-GCST90001810	ukb-saige-740.1	Osteoarthritis; localized || id:ukb-saige-740.1	CD38 on CD3- CD19- || id:ebi-a-GCST90001810	Wald ratio	1	0.0406218655967904	0.0601805416248746	0.499676	-0.077332	0.158575727181545	1.04145821989687	0.925582512910563	1.17184066105574	1
ebi-a-GCST90001811	ukb-saige-740.1	Osteoarthritis; localized || id:ukb-saige-740.1	CD38 on IgD+ CD24- B cell || id:ebi-a-GCST90001811	Inverse variance weighted	2	-0.0153621	0.0424705553673754	0.717568	-0.0986044	0.0678802123603545	0.984755318620969	0.906101122725978	1.07023709962398	1
ebi-a-GCST90001811	ukb-saige-740.1	Osteoarthritis; localized || id:ukb-saige-740.1	CD38 on IgD+ CD24- B cell || id:ebi-a-GCST90001811	Bayesian Weighted Mendelian Randomization	2	-0.0152611	0.0434817949935663	0.725606	-0.100485	0.0699632557548844	0.984854797450358	0.904398334059136	1.07246877347472	1
ebi-a-GCST90001812	ukb-saige-740.1	Osteoarthritis; localized || id:ukb-saige-740.1	CD38 on IgD+ CD38+ B cell || id:ebi-a-GCST90001812	Inverse variance weighted	3	0.0429541881594299	0.036752197269037	0.242504	-0.0290801	0.114988494806742	1.04389007122966	0.971338639166032	1.12186053027548	1
ebi-a-GCST90001812	ukb-saige-740.1	Osteoarthritis; localized || id:ukb-saige-740.1	CD38 on IgD+ CD38+ B cell || id:ebi-a-GCST90001812	Bayesian Weighted Mendelian Randomization	3	0.0431319283604283	0.0377080621829178	0.252691	-0.0307759	0.117039730238947	1.04407562895079	0.969692882577014	1.1241640921113	1
ebi-a-GCST90001812	ukb-saige-740.1	Osteoarthritis; localized || id:ukb-saige-740.1	CD38 on IgD+ CD38+ B cell || id:ebi-a-GCST90001812	MR Egger	3	0.0459978178013944	0.0882027416731614	0.693977	-0.12688	0.218875191480791	1.04707212603511	0.880839758179631	1.24467592083429	0.998524067790455
ebi-a-GCST90001812	ukb-saige-740.1	Osteoarthritis; localized || id:ukb-saige-740.1	CD38 on IgD+ CD38+ B cell || id:ebi-a-GCST90001812	Weighted median	3	0.0423792351479466	0.041342397653328	0.305326	-0.0386519	0.123410334548469	1.04329005599636	0.962085587236466	1.13134855711477	0.974299104969666
ebi-a-GCST90001812	ukb-saige-740.1	Osteoarthritis; localized || id:ukb-saige-740.1	CD38 on IgD+ CD38+ B cell || id:ebi-a-GCST90001812	Weighted mode	3	0.0550970626698175	0.0489322143399929	0.377122	-0.0408101	0.151004202776203	1.05664317030541	0.960011440468507	1.16300154590677	0.974498079964075
ebi-a-GCST90001813	ukb-saige-740.1	Osteoarthritis; localized || id:ukb-saige-740.1	CD38 on IgD+ CD38dim B cell || id:ebi-a-GCST90001813	Inverse variance weighted	4	-0.00418708	0.0264460377565607	0.8742	-0.0560213	0.0476471546165842	0.995821674209024	0.945518983461611	1.04880052560545	1
ebi-a-GCST90001813	ukb-saige-740.1	Osteoarthritis; localized || id:ukb-saige-740.1	CD38 on IgD+ CD38dim B cell || id:ebi-a-GCST90001813	Bayesian Weighted Mendelian Randomization	4	-0.00405181	0.0268362529407259	0.879989	-0.0566509	0.048547247968481	0.995956389702564	0.944923919155876	1.04974496896584	1
ebi-a-GCST90001813	ukb-saige-740.1	Osteoarthritis; localized || id:ukb-saige-740.1	CD38 on IgD+ CD38dim B cell || id:ebi-a-GCST90001813	MR Egger	4	-0.0266459	0.0782250597278098	0.765834	-0.179967	0.126675257420634	0.97370600906355	0.835297795235156	1.13504835939325	0.998524067790455
ebi-a-GCST90001813	ukb-saige-740.1	Osteoarthritis; localized || id:ukb-saige-740.1	CD38 on IgD+ CD38dim B cell || id:ebi-a-GCST90001813	Weighted median	4	-0.00949726	0.0307372632399195	0.757335	-0.0697423	0.0507477713978822	0.990547692030541	0.932634128287059	1.05205750082205	0.974299104969666
ebi-a-GCST90001813	ukb-saige-740.1	Osteoarthritis; localized || id:ukb-saige-740.1	CD38 on IgD+ CD38dim B cell || id:ebi-a-GCST90001813	Weighted mode	4	-0.014813	0.0406407446733767	0.739672	-0.0944689	0.0648428597783879	0.985296172976388	0.909856067702189	1.06699134395362	0.974498079964075
ebi-a-GCST90001815	ukb-saige-740.1	Osteoarthritis; localized || id:ukb-saige-740.1	CD38 on IgD- CD38dim B cell || id:ebi-a-GCST90001815	Inverse variance weighted	3	-0.0151671	0.0304397567992514	0.618297	-0.074829	0.0444948477098412	0.984947365166814	0.927902145010146	1.04549958997933	1
ebi-a-GCST90001815	ukb-saige-740.1	Osteoarthritis; localized || id:ukb-saige-740.1	CD38 on IgD- CD38dim B cell || id:ebi-a-GCST90001815	Bayesian Weighted Mendelian Randomization	3	-0.0151542	0.0308801823593442	0.623608	-0.0756794	0.0453709335271658	0.984960023515456	0.927113408788523	1.04641593868357	1
ebi-a-GCST90001815	ukb-saige-740.1	Osteoarthritis; localized || id:ukb-saige-740.1	CD38 on IgD- CD38dim B cell || id:ebi-a-GCST90001815	MR Egger	3	-0.00318448	0.0974930314519218	0.979213	-0.194271	0.187901856338927	0.996820579788495	0.823434865712163	1.20671507810213	0.998524067790455
ebi-a-GCST90001815	ukb-saige-740.1	Osteoarthritis; localized || id:ukb-saige-740.1	CD38 on IgD- CD38dim B cell || id:ebi-a-GCST90001815	Weighted median	3	-0.0224538	0.0357237631170452	0.529651	-0.0924724	0.0475647916239391	0.977796425905157	0.911674409483897	1.04871414681273	0.974299104969666
ebi-a-GCST90001815	ukb-saige-740.1	Osteoarthritis; localized || id:ukb-saige-740.1	CD38 on IgD- CD38dim B cell || id:ebi-a-GCST90001815	Weighted mode	3	-0.0310636	0.0435608665996767	0.549758	-0.116443	0.0543157333078036	0.969413950099167	0.8900809514001	1.05581790641471	0.974498079964075
ebi-a-GCST90001818	ukb-saige-740.1	Osteoarthritis; localized || id:ukb-saige-740.1	CD38 on IgD+ B cell || id:ebi-a-GCST90001818	Wald ratio	1	0.0230680507497117	0.0774427418026034	0.765801	-0.12872	0.174855824682814	1.02333617597177	0.879220356097695	1.19107448069157	1
ebi-a-GCST90001819	ukb-saige-740.1	Osteoarthritis; localized || id:ukb-saige-740.1	CD38 on transitional B cell || id:ebi-a-GCST90001819	Inverse variance weighted	5	-0.00579362	0.0248911329821075	0.815949	-0.0545802	0.0429930053477979	0.994223135327469	0.946882531797858	1.04393059289365	1
ebi-a-GCST90001819	ukb-saige-740.1	Osteoarthritis; localized || id:ukb-saige-740.1	CD38 on transitional B cell || id:ebi-a-GCST90001819	Bayesian Weighted Mendelian Randomization	5	-0.00569256	0.0252486679041301	0.821622	-0.0551799	0.0437948287382681	0.994323611566768	0.946314843799065	1.04476797653309	1
ebi-a-GCST90001819	ukb-saige-740.1	Osteoarthritis; localized || id:ukb-saige-740.1	CD38 on transitional B cell || id:ebi-a-GCST90001819	MR Egger	5	-0.00525976	0.0395451596823889	0.902609	-0.0827683	0.0722487567510494	0.994754052071314	0.920564445637099	1.07492270508825	0.998524067790455
ebi-a-GCST90001819	ukb-saige-740.1	Osteoarthritis; localized || id:ukb-saige-740.1	CD38 on transitional B cell || id:ebi-a-GCST90001819	Weighted median	5	-0.015467	0.0291823142918952	0.596103	-0.0726643	0.0417303443364106	0.984652007928122	0.929912923663479	1.04261329426124	0.974299104969666
ebi-a-GCST90001819	ukb-saige-740.1	Osteoarthritis; localized || id:ukb-saige-740.1	CD38 on transitional B cell || id:ebi-a-GCST90001819	Weighted mode	5	-0.0195642	0.0375756649294862	0.630094	-0.0932125	0.0540840888360177	0.980625922836286	0.910999876135539	1.05557336035844	0.974498079964075
ebi-a-GCST90001820	ukb-saige-740.1	Osteoarthritis; localized || id:ukb-saige-740.1	IgD on IgD+ CD24+ B cell || id:ebi-a-GCST90001820	Inverse variance weighted	5	0.000121619196747075	0.03574920855555	0.997286	-0.0699468	0.0701900679656251	1.00012162659266	0.932443397002301	1.0727120500762	1
ebi-a-GCST90001820	ukb-saige-740.1	Osteoarthritis; localized || id:ukb-saige-740.1	IgD on IgD+ CD24+ B cell || id:ebi-a-GCST90001820	Bayesian Weighted Mendelian Randomization	5	0.0135326033991787	0.0479484013180946	0.777765	-0.0804463	0.107511469982644	1.01362458351839	0.922704485452451	1.11350363254063	1
ebi-a-GCST90001820	ukb-saige-740.1	Osteoarthritis; localized || id:ukb-saige-740.1	IgD on IgD+ CD24+ B cell || id:ebi-a-GCST90001820	MR Egger	5	0.0487872791106332	0.0949436698033047	0.642807	-0.137302	0.23487687192511	1.04999697069263	0.871706657425629	1.26475303253923	0.998524067790455
ebi-a-GCST90001820	ukb-saige-740.1	Osteoarthritis; localized || id:ukb-saige-740.1	IgD on IgD+ CD24+ B cell || id:ebi-a-GCST90001820	Weighted median	5	0.00724078400933626	0.0211186734522957	0.731703	-0.0341518	0.0486333839758357	1.00726706187169	0.966424774797611	1.04983539370056	0.974299104969666
ebi-a-GCST90001820	ukb-saige-740.1	Osteoarthritis; localized || id:ukb-saige-740.1	IgD on IgD+ CD24+ B cell || id:ebi-a-GCST90001820	Weighted mode	5	0.00665163086383735	0.0217861611849195	0.775355	-0.0360492	0.0493525067862795	1.00667380209143	0.964592790884982	1.05059062579915	0.974498079964075
ebi-a-GCST90001822	ukb-saige-740.1	Osteoarthritis; localized || id:ukb-saige-740.1	IgD on IgD+ CD38- B cell || id:ebi-a-GCST90001822	Wald ratio	1	0.0141181149333864	0.0258500695963412	0.58496	-0.036548	0.0647842513422151	1.01421824618461	0.964111794713782	1.06692881109204	1
ebi-a-GCST90001823	ieu-a-1169	Hip osteoarthritis || id:ieu-a-1169	IgD on IgD+ CD38- unswitched memory B cell || id:ebi-a-GCST90001823	Wald ratio	1	-0.127794	0.203037181150022	0.529079	-0.525747	0.270158668396022	0.88003446574456	0.59111358921404	1.31017231718197	1
ebi-a-GCST90001823	ieu-a-1170	Knee and hip osteoarthritis || id:ieu-a-1170	IgD on IgD+ CD38- unswitched memory B cell || id:ebi-a-GCST90001823	Wald ratio	1	-0.210939	0.157076091655858	0.179301	-0.518808	0.0969300994379594	0.809823432044977	0.595229531943838	1.10178335565344	1
ebi-a-GCST90001823	ieu-a-1171	Knee osteoarthritis || id:ieu-a-1171	IgD on IgD+ CD38- unswitched memory B cell || id:ebi-a-GCST90001823	Wald ratio	1	-0.292514	0.195441850410722	0.134476	-0.675581	0.0905515434500648	0.746384434806899	0.508860935906608	1.09477793481922	1
ebi-a-GCST90001824	ieu-a-1169	Hip osteoarthritis || id:ieu-a-1169	IgD on IgD+ CD38+ B cell || id:ebi-a-GCST90001824	Wald ratio	1	-0.0370723	0.142127259313906	0.794217	-0.315642	0.241497130210254	0.963606465966963	0.729320699790807	1.27315380122856	1
ebi-a-GCST90001824	ieu-a-1170	Knee and hip osteoarthritis || id:ieu-a-1170	IgD on IgD+ CD38+ B cell || id:ebi-a-GCST90001824	Wald ratio	1	-0.0370723	0.104135005533014	0.721839	-0.241177	0.167032312799705	0.963606465966963	0.785702616315156	1.18179245171419	1
ebi-a-GCST90001824	ieu-a-1171	Knee osteoarthritis || id:ieu-a-1171	IgD on IgD+ CD38+ B cell || id:ebi-a-GCST90001824	Wald ratio	1	-0.0370723	0.142127259313906	0.794217	-0.315642	0.241497130210254	0.963606465966963	0.729320699790807	1.27315380122856	1
ebi-a-GCST90001826	ieu-a-1169	Hip osteoarthritis || id:ieu-a-1169	IgD on unswitched memory B cell || id:ebi-a-GCST90001826	Wald ratio	1	-0.147059	0.247218407960199	0.551941	-0.631607	0.337489373134328	0.863243297963972	0.531736727064645	1.40142471556064	1
ebi-a-GCST90001826	ieu-a-1170	Knee and hip osteoarthritis || id:ieu-a-1170	IgD on unswitched memory B cell || id:ebi-a-GCST90001826	Wald ratio	1	-0.0985204	0.174473134328358	0.572296	-0.440488	0.243446945273632	0.906177208214039	0.643722374519005	1.27563863738644	1
ebi-a-GCST90001827	ukb-saige-740.1	Osteoarthritis; localized || id:ukb-saige-740.1	IgD on IgD+ B cell || id:ebi-a-GCST90001827	Inverse variance weighted	2	0.00504427560236448	0.0206450159620436	0.806972	-0.03542	0.04550850688797	1.00505701937924	0.965199989911748	1.04655990754397	1
ebi-a-GCST90001827	ukb-saige-740.1	Osteoarthritis; localized || id:ukb-saige-740.1	IgD on IgD+ B cell || id:ebi-a-GCST90001827	Bayesian Weighted Mendelian Randomization	2	0.00506225709678421	0.0207936074118368	0.807655	-0.0356932	0.0458177276239844	1.00507509196891	0.964936277569293	1.04688357560872	1
ebi-a-GCST90001828	ieu-a-1169	Hip osteoarthritis || id:ieu-a-1169	IgD on transitional B cell || id:ebi-a-GCST90001828	Inverse variance weighted	2	0.0400657941127335	0.129503429349146	0.757032	-0.213761	0.293892515637059	1.04087925566661	0.807541422964957	1.34163969062934	1
ebi-a-GCST90001828	ieu-a-1169	Hip osteoarthritis || id:ieu-a-1169	IgD on transitional B cell || id:ebi-a-GCST90001828	Bayesian Weighted Mendelian Randomization	2	0.0414274472207069	0.134174355583757	0.757505	-0.221554	0.30440918416487	1.04229753752493	0.801272420108988	1.35582372419953	1
ebi-a-GCST90001828	ieu-a-1170	Knee and hip osteoarthritis || id:ieu-a-1170	IgD on transitional B cell || id:ebi-a-GCST90001828	Inverse variance weighted	2	0.0609086564014727	0.152599481420286	0.68979	-0.238186	0.360003639985233	1.0628018296096	0.788055841188757	1.43333463186774	1
ebi-a-GCST90001828	ieu-a-1170	Knee and hip osteoarthritis || id:ieu-a-1170	IgD on transitional B cell || id:ebi-a-GCST90001828	Bayesian Weighted Mendelian Randomization	2	0.0974385925164594	0.168882898319865	0.563967	-0.233572	0.428449073223394	1.10234374732936	0.791700679765212	1.53487519757657	1
ebi-a-GCST90001828	ieu-a-1171	Knee osteoarthritis || id:ieu-a-1171	IgD on transitional B cell || id:ebi-a-GCST90001828	Inverse variance weighted	2	0.0676665390467499	0.155221697144419	0.662884	-0.236568	0.371901065449811	1.07000844294635	0.789332215867062	1.45048947067086	1
ebi-a-GCST90001828	ieu-a-1171	Knee osteoarthritis || id:ieu-a-1171	IgD on transitional B cell || id:ebi-a-GCST90001828	Bayesian Weighted Mendelian Randomization	2	0.0854518488871698	0.166288946576674	0.607339	-0.240474	0.411378184177451	1.08920911345045	0.78625470537782	1.50889588921877	1
ebi-a-GCST90001828	ukb-saige-740.1	Osteoarthritis; localized || id:ukb-saige-740.1	IgD on transitional B cell || id:ebi-a-GCST90001828	Inverse variance weighted	5	0.00261278968645646	0.0190374198721414	0.890837	-0.0347006	0.0399261326358536	1.00261620599615	0.965894606945195	1.04073389508339	1
ebi-a-GCST90001828	ukb-saige-740.1	Osteoarthritis; localized || id:ukb-saige-740.1	IgD on transitional B cell || id:ebi-a-GCST90001828	Bayesian Weighted Mendelian Randomization	5	0.00264373296794468	0.0191875415304997	0.890411	-0.0349638	0.0402513143677241	1.00264723071164	0.965640325038593	1.04107237776502	1
ebi-a-GCST90001828	ukb-saige-740.1	Osteoarthritis; localized || id:ukb-saige-740.1	IgD on transitional B cell || id:ebi-a-GCST90001828	MR Egger	5	0.030649567012667	0.0417358126722064	0.515916	-0.0511526	0.112451759850192	1.03112410066751	0.95013364453413	1.11901827400154	0.998524067790455
ebi-a-GCST90001828	ukb-saige-740.1	Osteoarthritis; localized || id:ukb-saige-740.1	IgD on transitional B cell || id:ebi-a-GCST90001828	Weighted median	5	0.00578985783237484	0.0203449672737729	0.775963	-0.0340863	0.0456659936889698	1.00580665145449	0.966488114355245	1.04672473989498	0.974299104969666
ebi-a-GCST90001828	ukb-saige-740.1	Osteoarthritis; localized || id:ukb-saige-740.1	IgD on transitional B cell || id:ebi-a-GCST90001828	Weighted mode	5	0.0113244034822501	0.0226964638737296	0.644007	-0.0331607	0.0558094726747601	1.01138876727041	0.967383121806247	1.05739620167328	0.974498079964075
ebi-a-GCST90001829	ieu-a-1169	Hip osteoarthritis || id:ieu-a-1169	BAFF-R on B cell || id:ebi-a-GCST90001829	Inverse variance weighted	2	0.0525587061923044	0.109151471368641	0.630146	-0.161378	0.26649559007484	1.05396443450115	0.850970192305515	1.30538183268646	1
ebi-a-GCST90001829	ieu-a-1169	Hip osteoarthritis || id:ieu-a-1169	BAFF-R on B cell || id:ebi-a-GCST90001829	Bayesian Weighted Mendelian Randomization	2	0.0532471127208777	0.111541361481847	0.633095	-0.165374	0.271868181225297	1.0546902402948	0.847576688612023	1.31241398910428	1
ebi-a-GCST90001829	ieu-a-1170	Knee and hip osteoarthritis || id:ieu-a-1170	BAFF-R on B cell || id:ebi-a-GCST90001829	Inverse variance weighted	2	0.0374748664647337	0.100034679483539	0.707944	-0.158593	0.23354283825247	1.0381859034719	0.853343509269109	1.26306693431221	1
ebi-a-GCST90001829	ieu-a-1170	Knee and hip osteoarthritis || id:ieu-a-1170	BAFF-R on B cell || id:ebi-a-GCST90001829	Bayesian Weighted Mendelian Randomization	2	0.0459829149347543	0.102993421580199	0.655262	-0.155884	0.247850021231945	1.04705652177513	0.855658277252658	1.2812677548237	1
ebi-a-GCST90001829	ieu-a-1171	Knee osteoarthritis || id:ieu-a-1171	BAFF-R on B cell || id:ebi-a-GCST90001829	Inverse variance weighted	2	0.0357085487502054	0.179427854642401	0.842252	-0.31597	0.387387143849311	1.03635375587334	0.729081288487092	1.47312669282939	1
ebi-a-GCST90001829	ieu-a-1171	Knee osteoarthritis || id:ieu-a-1171	BAFF-R on B cell || id:ebi-a-GCST90001829	Bayesian Weighted Mendelian Randomization	2	0.0442738401506725	0.183123664556914	0.808958	-0.314649	0.403196222682223	1.04526855219833	0.730045409207208	1.49660052982359	1
ebi-a-GCST90001829	ukb-saige-740.1	Osteoarthritis; localized || id:ukb-saige-740.1	BAFF-R on B cell || id:ebi-a-GCST90001829	Inverse variance weighted	10	0.00193368967084821	0.0121801339067821	0.87386	-0.0219394	0.0258067521281411	1.00193556045436	0.978299544828724	1.02614262943233	1
ebi-a-GCST90001829	ukb-saige-740.1	Osteoarthritis; localized || id:ukb-saige-740.1	BAFF-R on B cell || id:ebi-a-GCST90001829	Bayesian Weighted Mendelian Randomization	10	0.00194479637315656	0.0127255234630695	0.878535	-0.0229972	0.0268868223607729	1.00194668871616	0.977265191170881	1.02725153428058	1
ebi-a-GCST90001829	ukb-saige-740.1	Osteoarthritis; localized || id:ukb-saige-740.1	BAFF-R on B cell || id:ebi-a-GCST90001829	MR Egger	10	0.00567225567056493	0.0187177819247937	0.769589	-0.0310146	0.0423591082431607	1.00568837337293	0.969461421839347	1.04326905800805	0.998524067790455
ebi-a-GCST90001829	ukb-saige-740.1	Osteoarthritis; localized || id:ukb-saige-740.1	BAFF-R on B cell || id:ebi-a-GCST90001829	Weighted median	10	0.00552050493858449	0.0130507584336659	0.672293	-0.020059	0.0310999914685696	1.00553577100518	0.980140861334053	1.03158864879358	0.974299104969666
ebi-a-GCST90001829	ukb-saige-740.1	Osteoarthritis; localized || id:ukb-saige-740.1	BAFF-R on B cell || id:ebi-a-GCST90001829	Weighted mode	10	0.00682139471491816	0.0131496620981377	0.616447	-0.0189519	0.032594732427268	1.00684471341972	0.98122651591496	1.03313175958761	0.974498079964075
ebi-a-GCST90001830	ieu-a-1169	Hip osteoarthritis || id:ieu-a-1169	BAFF-R on CD20- B cell || id:ebi-a-GCST90001830	Wald ratio	1	0.023844128113879	0.122685883748517	0.845901	-0.21662	0.264308460260973	1.02413067226929	0.805235736521791	1.30252991305779	1
ebi-a-GCST90001830	ieu-a-1170	Knee and hip osteoarthritis || id:ieu-a-1170	BAFF-R on CD20- B cell || id:ebi-a-GCST90001830	Wald ratio	1	0.0722638196915777	0.0932958481613286	0.438596	-0.110596	0.255123682087782	1.07493889670698	0.895300338994129	1.29062123773103	1
ebi-a-GCST90001830	ieu-a-1171	Knee osteoarthritis || id:ieu-a-1171	BAFF-R on CD20- B cell || id:ebi-a-GCST90001830	Wald ratio	1	0.0722638196915777	0.118316488730724	0.541354	-0.159636	0.304164137603796	1.07493889670698	0.852453601054982	1.35549152496229	1
ebi-a-GCST90001830	ukb-saige-740.1	Osteoarthritis; localized || id:ukb-saige-740.1	BAFF-R on CD20- B cell || id:ebi-a-GCST90001830	Wald ratio	1	0.00877817319098458	0.0474495848161329	0.853229	-0.084223	0.101779359430605	1.00881681433674	0.919226233789866	1.10713916496118	1
ebi-a-GCST90001831	ukb-saige-740.1	Osteoarthritis; localized || id:ukb-saige-740.1	CD62L on CD62L+ myeloid Dendritic Cell || id:ebi-a-GCST90001831	Wald ratio	1	-0.0518941	0.0674623767514271	0.441756	-0.18412	0.0803321224701608	0.949429371949364	0.831835649447665	1.08364691140455	1
ebi-a-GCST90001832	ieu-a-1169	Hip osteoarthritis || id:ieu-a-1169	CD62L on CD62L+ plasmacytoid Dendritic Cell || id:ebi-a-GCST90001832	Wald ratio	1	0.178793801779687	0.0956673826327094	0.0616352	-0.00871427	0.366301871739797	1.19577415224326	0.99132359100303	1.44239059389914	1
ebi-a-GCST90001832	ieu-a-1170	Knee and hip osteoarthritis || id:ieu-a-1170	CD62L on CD62L+ plasmacytoid Dendritic Cell || id:ebi-a-GCST90001832	Wald ratio	1	0.12034581159865	0.0753237189321878	0.110106	-0.0272887	0.267980300705738	1.12788682049209	0.973080294579806	1.30732138645259	1
ebi-a-GCST90001832	ieu-a-1171	Knee osteoarthritis || id:ieu-a-1171	CD62L on CD62L+ plasmacytoid Dendritic Cell || id:ebi-a-GCST90001832	Wald ratio	1	0.0906989874194538	0.0984473764958576	0.356897	-0.102258	0.283655845351335	1.0949393651242	0.902796716997539	1.32797582304662	1
ebi-a-GCST90001832	ukb-saige-740.1	Osteoarthritis; localized || id:ukb-saige-740.1	CD62L on CD62L+ plasmacytoid Dendritic Cell || id:ebi-a-GCST90001832	Inverse variance weighted	2	0.017018883280763	0.0335826489515746	0.612312	-0.0488031	0.0828408752258492	1.01716452954729	0.95236862437037	1.08636892658361	1
ebi-a-GCST90001832	ukb-saige-740.1	Osteoarthritis; localized || id:ukb-saige-740.1	CD62L on CD62L+ plasmacytoid Dendritic Cell || id:ebi-a-GCST90001832	Bayesian Weighted Mendelian Randomization	2	0.0171234141512698	0.0340441605115373	0.614981	-0.0496031	0.0838499687538829	1.01727086019833	0.95160700389883	1.08746572773089	1
ebi-a-GCST90001833	ukb-saige-740.1	Osteoarthritis; localized || id:ukb-saige-740.1	CD62L on CD62L+ Dendritic Cell || id:ebi-a-GCST90001833	Inverse variance weighted	2	0.0203136786167128	0.0442089835168936	0.645881	-0.0663359	0.106963286309824	1.0205214055681	0.935816443529484	1.11289339530597	1
ebi-a-GCST90001833	ukb-saige-740.1	Osteoarthritis; localized || id:ukb-saige-740.1	CD62L on CD62L+ Dendritic Cell || id:ebi-a-GCST90001833	Bayesian Weighted Mendelian Randomization	2	0.0205554019338808	0.0453450750333482	0.650325	-0.0683209	0.109431748999243	1.02076811920451	0.933960675338649	1.11564392452231	1
ebi-a-GCST90001834	ukb-saige-740.1	Osteoarthritis; localized || id:ukb-saige-740.1	CD62L on monocyte || id:ebi-a-GCST90001834	Inverse variance weighted	2	-0.00535485	0.0249521926048388	0.830076	-0.0542611	0.0435514458972515	0.994659460052639	0.947184717750961	1.04451372887578	1
ebi-a-GCST90001834	ukb-saige-740.1	Osteoarthritis; localized || id:ukb-saige-740.1	CD62L on monocyte || id:ebi-a-GCST90001834	Bayesian Weighted Mendelian Randomization	2	-0.00539372	0.0251628911248452	0.830273	-0.054713	0.0439255506053878	0.994620803969573	0.94675684464497	1.04490455948069	1
ebi-a-GCST90001838	ukb-saige-740.1	Osteoarthritis; localized || id:ukb-saige-740.1	CD3 on naive CD8+ T cell || id:ebi-a-GCST90001838	Inverse variance weighted	6	0.01223889290974	0.0170223256909334	0.472147	-0.0211249	0.0456026512639695	1.01231409464172	0.979096701591566	1.04665843991147	1
ebi-a-GCST90001838	ukb-saige-740.1	Osteoarthritis; localized || id:ukb-saige-740.1	CD3 on naive CD8+ T cell || id:ebi-a-GCST90001838	Bayesian Weighted Mendelian Randomization	6	0.0110846288966407	0.018638936174572	0.552042	-0.0254477	0.0476169437988018	1.01114629101883	0.97487337715224	1.04876884096249	1
ebi-a-GCST90001838	ukb-saige-740.1	Osteoarthritis; localized || id:ukb-saige-740.1	CD3 on naive CD8+ T cell || id:ebi-a-GCST90001838	MR Egger	6	0.0208007973468751	0.0412405321059253	0.640512	-0.0600306	0.101632240274489	1.02101864175598	0.941735673105424	1.10697629556242	0.998524067790455
ebi-a-GCST90001838	ukb-saige-740.1	Osteoarthritis; localized || id:ukb-saige-740.1	CD3 on naive CD8+ T cell || id:ebi-a-GCST90001838	Weighted median	6	0.0180293831818739	0.0156376075585627	0.248931	-0.0126203	0.0486790939966568	1.01819289369724	0.987458974743989	1.04988338279505	0.974299104969666
ebi-a-GCST90001838	ukb-saige-740.1	Osteoarthritis; localized || id:ukb-saige-740.1	CD3 on naive CD8+ T cell || id:ebi-a-GCST90001838	Weighted mode	6	0.0175229839250653	0.0173590215930717	0.359087	-0.0165007	0.0515466662474859	1.01767741210334	0.983634692422565	1.05289831995926	0.974498079964075
ebi-a-GCST90001839	ieu-a-1169	Hip osteoarthritis || id:ieu-a-1169	CD3 on Effector Memory CD8+ T cell || id:ebi-a-GCST90001839	Wald ratio	1	-0.213151	0.191522062035824	0.265738	-0.588534	0.16223252075142	0.808034340424498	0.555140545350203	1.17613368501731	1
ebi-a-GCST90001839	ieu-a-1170	Knee and hip osteoarthritis || id:ieu-a-1170	CD3 on Effector Memory CD8+ T cell || id:ebi-a-GCST90001839	Wald ratio	1	-0.171344	0.150252075141983	0.254129	-0.465838	0.123149812145042	0.842531477754877	0.627608746113621	1.13105385385962	1
ebi-a-GCST90001839	ieu-a-1171	Knee osteoarthritis || id:ieu-a-1171	CD3 on Effector Memory CD8+ T cell || id:ebi-a-GCST90001839	Wald ratio	1	-0.213151	0.191522062035824	0.265738	-0.588534	0.16223252075142	0.808034340424498	0.555140545350203	1.17613368501731	1
ebi-a-GCST90001839	ukb-saige-740.1	Osteoarthritis; localized || id:ukb-saige-740.1	CD3 on Effector Memory CD8+ T cell || id:ebi-a-GCST90001839	Inverse variance weighted	3	0.0108005151802808	0.0261953222280145	0.680114	-0.0405423	0.0621433467471892	1.01085905129461	0.960268528557315	1.06411487120111	1
ebi-a-GCST90001839	ukb-saige-740.1	Osteoarthritis; localized || id:ukb-saige-740.1	CD3 on Effector Memory CD8+ T cell || id:ebi-a-GCST90001839	Bayesian Weighted Mendelian Randomization	3	0.0106961831428676	0.0267014553454108	0.688726	-0.0416387	0.0630310356198727	1.01075359181175	0.959216312231261	1.06505989351237	1
ebi-a-GCST90001839	ukb-saige-740.1	Osteoarthritis; localized || id:ukb-saige-740.1	CD3 on Effector Memory CD8+ T cell || id:ebi-a-GCST90001839	MR Egger	3	0.0540722248116006	0.0908077626536256	0.658089	-0.123911	0.232055439612707	1.05556083708461	0.883458474031175	1.26118964675577	0.998524067790455
ebi-a-GCST90001839	ukb-saige-740.1	Osteoarthritis; localized || id:ukb-saige-740.1	CD3 on Effector Memory CD8+ T cell || id:ebi-a-GCST90001839	Weighted median	3	0.0142143208426971	0.0287811469271756	0.621394	-0.0421967	0.0706253688199612	1.01431582466696	0.958681163421794	1.0731791041952	0.974299104969666
ebi-a-GCST90001839	ukb-saige-740.1	Osteoarthritis; localized || id:ukb-saige-740.1	CD3 on Effector Memory CD8+ T cell || id:ebi-a-GCST90001839	Weighted mode	3	0.0150867196314712	0.0305547369119973	0.670372	-0.0448006	0.0749740039789859	1.01520109866367	0.956188160475744	1.0778561305498	0.974498079964075
ebi-a-GCST90001840	ukb-saige-740.1	Osteoarthritis; localized || id:ukb-saige-740.1	CD3 on Terminally Differentiated CD8+ T cell || id:ebi-a-GCST90001840	Inverse variance weighted	2	0.0297598136793863	0.0409732998437353	0.467641	-0.0505479	0.110067481373108	1.03020706259125	0.950708432368794	1.11635340097751	1
ebi-a-GCST90001840	ukb-saige-740.1	Osteoarthritis; localized || id:ukb-saige-740.1	CD3 on Terminally Differentiated CD8+ T cell || id:ebi-a-GCST90001840	Bayesian Weighted Mendelian Randomization	2	0.0303818934446888	0.0421996769942205	0.471552	-0.0523295	0.113093260353361	1.03084813293674	0.949016139693149	1.11973635508743	1
ebi-a-GCST90001841	ieu-a-1169	Hip osteoarthritis || id:ieu-a-1169	CD3 on Central Memory CD4+ T cell || id:ebi-a-GCST90001841	Wald ratio	1	0.200994583948794	0.26262776957164	0.44408	-0.313756	0.715745012309207	1.22261815004289	0.730697410238173	2.04571019394617	1
ebi-a-GCST90001841	ieu-a-1170	Knee and hip osteoarthritis || id:ieu-a-1170	CD3 on Central Memory CD4+ T cell || id:ebi-a-GCST90001841	Wald ratio	1	0.252551944854751	0.197691285081241	0.201423	-0.134923	0.640026863613983	1.28730636336014	0.873783213205258	1.89653182631953	1
ebi-a-GCST90001841	ieu-a-1171	Knee osteoarthritis || id:ieu-a-1171	CD3 on Central Memory CD4+ T cell || id:ebi-a-GCST90001841	Wald ratio	1	0.357315115706549	0.256122107336288	0.162987	-0.144684	0.859314446085672	1.42948625245928	0.865295497593514	2.36154117483922	1
ebi-a-GCST90001842	ieu-a-1169	Hip osteoarthritis || id:ieu-a-1169	CD3 on Naive CD4+ T cell || id:ebi-a-GCST90001842	Wald ratio	1	0.174304013663535	0.227752775405636	0.44408	-0.272091	0.620699453458582	1.19041741397334	0.761784610885943	1.86022873032697	1
ebi-a-GCST90001842	ieu-a-1170	Knee and hip osteoarthritis || id:ieu-a-1170	CD3 on Naive CD4+ T cell || id:ebi-a-GCST90001842	Wald ratio	1	0.219014944491887	0.171439368061486	0.201423	-0.117006	0.5550361058924	1.24484988019746	0.889579662710742	1.74200388024328	1
ebi-a-GCST90001842	ieu-a-1171	Knee osteoarthritis || id:ieu-a-1171	CD3 on Naive CD4+ T cell || id:ebi-a-GCST90001842	Wald ratio	1	0.30986635354398	0.222111016225448	0.162987	-0.125471	0.745203945345858	1.36324290937341	0.882081134252286	2.10687107771804	1
ebi-a-GCST90001843	ukb-saige-740.1	Osteoarthritis; localized || id:ukb-saige-740.1	CD3 on Effector Memory CD4+ T cell || id:ebi-a-GCST90001843	Inverse variance weighted	2	0.01401375912682	0.0210919497402369	0.506426	-0.0273265	0.0553539806176844	1.01411241214379	0.973043527576005	1.05691467577617	1
ebi-a-GCST90001843	ukb-saige-740.1	Osteoarthritis; localized || id:ukb-saige-740.1	CD3 on Effector Memory CD4+ T cell || id:ebi-a-GCST90001843	Bayesian Weighted Mendelian Randomization	2	0.0140578832349987	0.0212227561088547	0.507717	-0.0275387	0.0556544852083539	1.01415715993679	0.972837014802395	1.05723233121425	1
ebi-a-GCST90001844	ieu-a-1169	Hip osteoarthritis || id:ieu-a-1169	CD3 on Terminally Differentiated CD4+ T cell || id:ebi-a-GCST90001844	Wald ratio	1	-0.0738133	0.104195104128608	0.478688	-0.278036	0.130409104859335	0.928845093745507	0.757269783982609	1.13929437886421	1
ebi-a-GCST90001844	ieu-a-1170	Knee and hip osteoarthritis || id:ieu-a-1170	CD3 on Terminally Differentiated CD4+ T cell || id:ebi-a-GCST90001844	Wald ratio	1	-0.0738133	0.0761278772378517	0.332248	-0.223024	0.0753973401534527	0.928845093745507	0.800095695879334	1.07831252263756	1
ebi-a-GCST90001844	ieu-a-1171	Knee osteoarthritis || id:ieu-a-1171	CD3 on Terminally Differentiated CD4+ T cell || id:ebi-a-GCST90001844	Wald ratio	1	-0.111287	0.0961728169528681	0.247209	-0.299786	0.077211910851297	0.894682108015061	0.740977119816087	1.08027097328046	1
ebi-a-GCST90001844	ukb-saige-740.1	Osteoarthritis; localized || id:ukb-saige-740.1	CD3 on Terminally Differentiated CD4+ T cell || id:ebi-a-GCST90001844	Wald ratio	1	0.0120569967117282	0.0401899890390939	0.764177	-0.0667154	0.0908293752283522	1.01212997530253	0.935461412789566	1.09508214117682	1
ebi-a-GCST90001845	ukb-saige-740.1	Osteoarthritis; localized || id:ukb-saige-740.1	CD3 on CD45RA- CD4+ T cell || id:ebi-a-GCST90001845	Inverse variance weighted	3	0.010482718728741	0.025526001815018	0.681316	-0.0395482	0.0605136822861763	1.01053785491534	0.96122357880503	1.06238213328726	1
ebi-a-GCST90001845	ukb-saige-740.1	Osteoarthritis; localized || id:ukb-saige-740.1	CD3 on CD45RA- CD4+ T cell || id:ebi-a-GCST90001845	Bayesian Weighted Mendelian Randomization	3	0.00558901380729287	0.0298051687964265	0.851254	-0.0528291	0.0640071446482888	1.00560466148307	0.948542088319613	1.06610001564395	1
ebi-a-GCST90001845	ukb-saige-740.1	Osteoarthritis; localized || id:ukb-saige-740.1	CD3 on CD45RA- CD4+ T cell || id:ebi-a-GCST90001845	MR Egger	3	0.162762415533483	0.0829810966967844	0.300154	0.00011946600778559	0.325405365059181	1.17675707727158	1.00011947314413	1.38459179737337	0.998524067790455
ebi-a-GCST90001845	ukb-saige-740.1	Osteoarthritis; localized || id:ukb-saige-740.1	CD3 on CD45RA- CD4+ T cell || id:ebi-a-GCST90001845	Weighted median	3	0.0211897267497045	0.0187297727971567	0.257912	-0.0155206	0.0579000814321317	1.02141582315935	0.984599196296272	1.05960911579534	0.974299104969666
ebi-a-GCST90001845	ukb-saige-740.1	Osteoarthritis; localized || id:ukb-saige-740.1	CD3 on CD45RA- CD4+ T cell || id:ebi-a-GCST90001845	Weighted mode	3	0.022031439678778	0.0186514606536297	0.358949	-0.0145254	0.0585883025598922	1.02227592399188	0.985579561825251	1.06033861217462	0.974498079964075
ebi-a-GCST90001846	ieu-a-1169	Hip osteoarthritis || id:ieu-a-1169	CD3 on Central Memory CD8+ T cell || id:ebi-a-GCST90001846	Inverse variance weighted	2	-0.057921	0.0622652379844798	0.352252	-0.179961	0.0641188201190431	0.943724455004121	0.835302860439762	1.0662190795132	1
ebi-a-GCST90001846	ieu-a-1169	Hip osteoarthritis || id:ieu-a-1169	CD3 on Central Memory CD8+ T cell || id:ebi-a-GCST90001846	Bayesian Weighted Mendelian Randomization	2	-0.0581104	0.0627806687511477	0.354649	-0.181161	0.0649396858398039	0.943545750727036	0.83430141281267	1.06709466152486	1
ebi-a-GCST90001846	ieu-a-1170	Knee and hip osteoarthritis || id:ieu-a-1170	CD3 on Central Memory CD8+ T cell || id:ebi-a-GCST90001846	Inverse variance weighted	2	-0.049368	0.0455562709543986	0.278511	-0.138658	0.0399222762967007	0.951830777446684	0.87052543109697	1.04072988166826	1
ebi-a-GCST90001846	ieu-a-1170	Knee and hip osteoarthritis || id:ieu-a-1170	CD3 on Central Memory CD8+ T cell || id:ebi-a-GCST90001846	Bayesian Weighted Mendelian Randomization	2	-0.049513	0.0459452793365638	0.281189	-0.139566	0.0405397242222327	0.951692763896861	0.86973581812258	1.04137267660051	1
ebi-a-GCST90001846	ieu-a-1171	Knee osteoarthritis || id:ieu-a-1171	CD3 on Central Memory CD8+ T cell || id:ebi-a-GCST90001846	Inverse variance weighted	2	-0.0631501	0.0582409124926256	0.278236	-0.177302	0.0510020976053625	0.938802557412113	0.837526579252399	1.05232510064366	1
ebi-a-GCST90001846	ieu-a-1171	Knee osteoarthritis || id:ieu-a-1171	CD3 on Central Memory CD8+ T cell || id:ebi-a-GCST90001846	Bayesian Weighted Mendelian Randomization	2	-0.0633982	0.0587697081472773	0.280696	-0.178587	0.0517904310210314	0.93856966369385	0.83645142889918	1.05315501076461	1
ebi-a-GCST90001847	ieu-a-1169	Hip osteoarthritis || id:ieu-a-1169	CD3 on HLA DR+ T cell || id:ebi-a-GCST90001847	Inverse variance weighted	2	-0.0831033	0.0720318687357836	0.248622	-0.224286	0.0580791701547349	0.920256086696825	0.799086758473076	1.05979889683166	1
ebi-a-GCST90001847	ieu-a-1169	Hip osteoarthritis || id:ieu-a-1169	CD3 on HLA DR+ T cell || id:ebi-a-GCST90001847	Bayesian Weighted Mendelian Randomization	2	-0.0853527	0.0750492080153265	0.255417	-0.232449	0.0617437509654354	0.918188385231319	0.7925900559214	1.06368974033318	1
ebi-a-GCST90001847	ieu-a-1170	Knee and hip osteoarthritis || id:ieu-a-1170	CD3 on HLA DR+ T cell || id:ebi-a-GCST90001847	Inverse variance weighted	2	-0.0662154	0.0493772340948091	0.179917	-0.162995	0.0305639892176896	0.935929253144847	0.849595633118624	1.03103586311627	1
ebi-a-GCST90001847	ieu-a-1170	Knee and hip osteoarthritis || id:ieu-a-1170	CD3 on HLA DR+ T cell || id:ebi-a-GCST90001847	Bayesian Weighted Mendelian Randomization	2	-0.0665784	0.0499921682913509	0.182934	-0.164563	0.0314062401365773	0.935589553670449	0.848264264081801	1.03190461982359	1
ebi-a-GCST90001847	ieu-a-1171	Knee osteoarthritis || id:ieu-a-1171	CD3 on HLA DR+ T cell || id:ebi-a-GCST90001847	Inverse variance weighted	2	-0.0882196	0.0625981320254599	0.158746	-0.210912	0.0344727853756413	0.915559840384423	0.809845417465054	1.03507385884655	1
ebi-a-GCST90001847	ieu-a-1171	Knee osteoarthritis || id:ieu-a-1171	CD3 on HLA DR+ T cell || id:ebi-a-GCST90001847	Bayesian Weighted Mendelian Randomization	2	-0.0886265	0.0633613310719438	0.161889	-0.212815	0.0355616926237611	0.915187317318903	0.808305882072298	1.03620157214996	1
ebi-a-GCST90001847	ukb-saige-740.1	Osteoarthritis; localized || id:ukb-saige-740.1	CD3 on HLA DR+ T cell || id:ebi-a-GCST90001847	Inverse variance weighted	2	0.00860336344496526	0.0257950842277345	0.738736	-0.041955	0.0591617285313249	1.00864047873868	0.958912929109526	1.06094681223554	1
ebi-a-GCST90001847	ukb-saige-740.1	Osteoarthritis; localized || id:ukb-saige-740.1	CD3 on HLA DR+ T cell || id:ebi-a-GCST90001847	Bayesian Weighted Mendelian Randomization	2	0.00863577949323733	0.0259974032030236	0.739754	-0.0423191	0.0595906897711635	1.00867317540707	0.958563824529589	1.06140201492069	1
ebi-a-GCST90001848	ukb-saige-740.1	Osteoarthritis; localized || id:ukb-saige-740.1	CD3 on Natural Killer T || id:ebi-a-GCST90001848	Inverse variance weighted	2	-0.063778	0.0560739143244498	0.255375	-0.173683	0.0461268599104851	0.938213248342881	0.840563411302222	1.04720725114885	1
ebi-a-GCST90001848	ukb-saige-740.1	Osteoarthritis; localized || id:ukb-saige-740.1	CD3 on Natural Killer T || id:ebi-a-GCST90001848	Bayesian Weighted Mendelian Randomization	2	-0.065173	0.0582908424973786	0.263539	-0.179423	0.0490770609324109	0.936905373757648	0.835752266577646	1.05030128481788	1
ebi-a-GCST90001849	ieu-a-1169	Hip osteoarthritis || id:ieu-a-1169	CD3 on HLA DR+ CD4+ T cell || id:ebi-a-GCST90001849	Wald ratio	1	-0.0460828	0.0650506386861314	0.478688	-0.173582	0.081416450729927	0.954962886944383	0.840648170695043	1.08482257766308	1
ebi-a-GCST90001849	ieu-a-1170	Knee and hip osteoarthritis || id:ieu-a-1170	CD3 on HLA DR+ CD4+ T cell || id:ebi-a-GCST90001849	Wald ratio	1	-0.0460828	0.0475278284671533	0.332248	-0.139237	0.0470717427007299	0.954962886944383	0.870021508791281	1.0481972068807	1
ebi-a-GCST90001849	ieu-a-1171	Knee osteoarthritis || id:ieu-a-1171	CD3 on HLA DR+ CD4+ T cell || id:ebi-a-GCST90001849	Wald ratio	1	-0.0694781	0.0600421989051095	0.247209	-0.187161	0.0482046076642336	0.932880561202379	0.829310362567288	1.04938534564453	1
ebi-a-GCST90001849	ukb-saige-740.1	Osteoarthritis; localized || id:ukb-saige-740.1	CD3 on HLA DR+ CD4+ T cell || id:ebi-a-GCST90001849	Inverse variance weighted	2	-0.000150283	0.030844118984365	0.996112	-0.0606048	0.0603041897786073	0.999849727861241	0.94119516741049	1.06215959550097	1
ebi-a-GCST90001849	ukb-saige-740.1	Osteoarthritis; localized || id:ukb-saige-740.1	CD3 on HLA DR+ CD4+ T cell || id:ebi-a-GCST90001849	Bayesian Weighted Mendelian Randomization	2	-0.0189657	0.0537326947679796	0.724116	-0.124282	0.0863503832873619	0.981213018785261	0.883130956998679	1.09018824513376	1
ebi-a-GCST90001850	ukb-saige-740.1	Osteoarthritis; localized || id:ukb-saige-740.1	CD3 on HLA DR+ CD8+ T cell || id:ebi-a-GCST90001850	Wald ratio	1	0.0106951871657754	0.0392156862745098	0.785063	-0.0661676	0.0875579322638146	1.01075258512483	0.935974021280182	1.09150549599571	1
ebi-a-GCST90001851	ukb-saige-740.1	Osteoarthritis; localized || id:ukb-saige-740.1	CD3 on T cell || id:ebi-a-GCST90001851	Inverse variance weighted	2	0.0109833024503693	0.0393002062994208	0.779883	-0.0660451	0.088011706797234	1.01104384034907	0.936088643966387	1.09200090578655	1
ebi-a-GCST90001851	ukb-saige-740.1	Osteoarthritis; localized || id:ukb-saige-740.1	CD3 on T cell || id:ebi-a-GCST90001851	Bayesian Weighted Mendelian Randomization	2	0.0110547841044434	0.0406274295524018	0.785544	-0.068575	0.0906845460271508	1.01111611401821	0.93372344893185	1.09492355278946	1
ebi-a-GCST90001852	ieu-a-1169	Hip osteoarthritis || id:ieu-a-1169	CD3 on CD39+ resting CD4 regulatory T cell || id:ebi-a-GCST90001852	Wald ratio	1	-0.0307819	0.0864655436447167	0.721839	-0.200254	0.138690535987749	0.969687010098039	0.818522498477154	1.14876854246801	1
ebi-a-GCST90001852	ieu-a-1170	Knee and hip osteoarthritis || id:ieu-a-1170	CD3 on CD39+ resting CD4 regulatory T cell || id:ebi-a-GCST90001852	Wald ratio	1	-0.0618766	0.0638168453292496	0.332248	-0.186958	0.0632044471669219	0.939998903997938	0.829478916723684	1.06524460321114	1
ebi-a-GCST90001852	ieu-a-1171	Knee osteoarthritis || id:ieu-a-1171	CD3 on CD39+ resting CD4 regulatory T cell || id:ebi-a-GCST90001852	Wald ratio	1	-0.125029	0.0891592649310873	0.160822	-0.299781	0.0497230627871363	0.882471225406625	0.740980288138193	1.05098000059812	1
ebi-a-GCST90001852	ukb-saige-740.1	Osteoarthritis; localized || id:ukb-saige-740.1	CD3 on CD39+ resting CD4 regulatory T cell || id:ebi-a-GCST90001852	Wald ratio	1	0.00888208269525268	0.0336906584992343	0.79206	-0.0571516	0.0749157733537519	1.00892164543819	0.944450872238759	1.07779336814078	1
ebi-a-GCST90001854	ukb-saige-740.1	Osteoarthritis; localized || id:ukb-saige-740.1	CD3 on CD39+ activated CD4 regulatory T cell || id:ebi-a-GCST90001854	Inverse variance weighted	3	0.0265580144951621	0.0166525200882671	0.110749	-0.00608093	0.0591969538681656	1.02691382142051	0.993937526526364	1.0609841851026	1
ebi-a-GCST90001854	ukb-saige-740.1	Osteoarthritis; localized || id:ukb-saige-740.1	CD3 on CD39+ activated CD4 regulatory T cell || id:ebi-a-GCST90001854	Bayesian Weighted Mendelian Randomization	3	0.0265106112134421	0.0167699222592203	0.113914	-0.00635844	0.0593796588415139	1.02686514348908	0.993661735665249	1.06117804989936	1
ebi-a-GCST90001854	ukb-saige-740.1	Osteoarthritis; localized || id:ukb-saige-740.1	CD3 on CD39+ activated CD4 regulatory T cell || id:ebi-a-GCST90001854	MR Egger	3	0.0293948453074357	0.0485379714068479	0.653341	-0.0657396	0.124529269264858	1.02983113820128	0.936374684501703	1.13261517078852	0.998524067790455
ebi-a-GCST90001854	ukb-saige-740.1	Osteoarthritis; localized || id:ukb-saige-740.1	CD3 on CD39+ activated CD4 regulatory T cell || id:ebi-a-GCST90001854	Weighted median	3	0.0206622075688225	0.0178900293641475	0.248108	-0.0144023	0.0557266651225517	1.02088	0.985700966307651	1.05730864490733	0.974299104969666
ebi-a-GCST90001854	ukb-saige-740.1	Osteoarthritis; localized || id:ukb-saige-740.1	CD3 on CD39+ activated CD4 regulatory T cell || id:ebi-a-GCST90001854	Weighted mode	3	0.0200861954230129	0.0184953270929904	0.390938	-0.0161646	0.0563370365252741	1.0202892805028	0.983965301082436	1.05795	0.974498079964075
ebi-a-GCST90001855	ukb-saige-740.1	Osteoarthritis; localized || id:ukb-saige-740.1	CD3 on secreting CD4 regulatory T cell || id:ebi-a-GCST90001855	Inverse variance weighted	3	0.0113202555150169	0.0217781865572318	0.603204	-0.031365	0.0540055011671911	1.01138457207165	0.969121788621484	1.05549040856832	1
ebi-a-GCST90001855	ukb-saige-740.1	Osteoarthritis; localized || id:ukb-saige-740.1	CD3 on secreting CD4 regulatory T cell || id:ebi-a-GCST90001855	Bayesian Weighted Mendelian Randomization	3	0.00916921582597012	0.0257979910747532	0.722272	-0.0413948	0.0597332783324865	1.00921138186337	0.959450219412654	1.06155336949744	1
ebi-a-GCST90001855	ukb-saige-740.1	Osteoarthritis; localized || id:ukb-saige-740.1	CD3 on secreting CD4 regulatory T cell || id:ebi-a-GCST90001855	MR Egger	3	0.127995385582449	0.0608987333260939	0.282717	0.00863386826330513	0.247356902901593	1.13654775817904	1.00867124760255	1.28063609396228	0.998524067790455
ebi-a-GCST90001855	ukb-saige-740.1	Osteoarthritis; localized || id:ukb-saige-740.1	CD3 on secreting CD4 regulatory T cell || id:ebi-a-GCST90001855	Weighted median	3	0.019999868862218	0.015948919739479	0.209844	-0.01126	0.0512597515515968	1.02020120623982	0.988803142857887	1.05259627129116	0.974299104969666
ebi-a-GCST90001855	ukb-saige-740.1	Osteoarthritis; localized || id:ukb-saige-740.1	CD3 on secreting CD4 regulatory T cell || id:ebi-a-GCST90001855	Weighted mode	3	0.0202573015402917	0.0165150236611448	0.344781	-0.0121121	0.0526267479161356	1.0204638731766	0.98796091193517	1.05403615049794	0.974498079964075
ebi-a-GCST90001859	ieu-a-1169	Hip osteoarthritis || id:ieu-a-1169	CD3 on CD8+ T cell || id:ebi-a-GCST90001859	Inverse variance weighted	2	-0.0596332	0.0634361304252726	0.347191	-0.183968	0.0647015910608047	0.942110013026254	0.83196239274825	1.06684062210118	1
ebi-a-GCST90001859	ieu-a-1169	Hip osteoarthritis || id:ieu-a-1169	CD3 on CD8+ T cell || id:ebi-a-GCST90001859	Bayesian Weighted Mendelian Randomization	2	-0.0598427	0.064001416959544	0.349778	-0.185285	0.0656001193861118	0.941912724494462	0.830867091374799	1.06779963940631	1
ebi-a-GCST90001859	ieu-a-1170	Knee and hip osteoarthritis || id:ieu-a-1170	CD3 on CD8+ T cell || id:ebi-a-GCST90001859	Inverse variance weighted	2	-0.0503941	0.0464211588590444	0.277662	-0.14138	0.0405913328980748	0.950854582269582	0.868159687186547	1.04142642185226	1
ebi-a-GCST90001859	ieu-a-1170	Knee and hip osteoarthritis || id:ieu-a-1170	CD3 on CD8+ T cell || id:ebi-a-GCST90001859	Bayesian Weighted Mendelian Randomization	2	-0.0505558	0.0468485137246838	0.280529	-0.142379	0.0412673242765535	0.950700913616794	0.867292620841362	1.04213065513575	1
ebi-a-GCST90001859	ieu-a-1171	Knee osteoarthritis || id:ieu-a-1171	CD3 on CD8+ T cell || id:ebi-a-GCST90001859	Inverse variance weighted	2	-0.0638615	0.0594375634504002	0.28263	-0.180359	0.0526360934169461	0.938134893188732	0.834970273546072	1.05404600103967	1
ebi-a-GCST90001859	ieu-a-1171	Knee osteoarthritis || id:ieu-a-1171	CD3 on CD8+ T cell || id:ebi-a-GCST90001859	Bayesian Weighted Mendelian Randomization	2	-0.0641365	0.0600169324496034	0.285232	-0.18177	0.0534966948861335	0.937876977418818	0.83379335732457	1.05495350502037	1
ebi-a-GCST90001859	ukb-saige-740.1	Osteoarthritis; localized || id:ukb-saige-740.1	CD3 on CD8+ T cell || id:ebi-a-GCST90001859	Inverse variance weighted	2	0.00764007757672366	0.0249291861525323	0.759246	-0.0412211	0.0565012824356869	1.00766933743782	0.959616909005664	1.05812797178043	1
ebi-a-GCST90001859	ukb-saige-740.1	Osteoarthritis; localized || id:ukb-saige-740.1	CD3 on CD8+ T cell || id:ebi-a-GCST90001859	Bayesian Weighted Mendelian Randomization	2	0.00766917285197725	0.0251164090373248	0.760103	-0.041559	0.056897334565134	1.00769865628107	0.959292746085791	1.05854712861538	1
ebi-a-GCST90001860	ukb-saige-740.1	Osteoarthritis; localized || id:ukb-saige-740.1	CD3 on CD39+ CD4+ T cell || id:ebi-a-GCST90001860	Inverse variance weighted	3	0.014721007086923	0.0162887157635911	0.366125	-0.0172049	0.0466468899835615	1.01482989476775	0.982942282908329	1.04775197203554	1
ebi-a-GCST90001860	ukb-saige-740.1	Osteoarthritis; localized || id:ukb-saige-740.1	CD3 on CD39+ CD4+ T cell || id:ebi-a-GCST90001860	Bayesian Weighted Mendelian Randomization	3	0.0148024579776544	0.0163685849948157	0.365825	-0.01728	0.0468848845674932	1.01491255693302	0.982868473788941	1.04800136100562	1
ebi-a-GCST90001860	ukb-saige-740.1	Osteoarthritis; localized || id:ukb-saige-740.1	CD3 on CD39+ CD4+ T cell || id:ebi-a-GCST90001860	MR Egger	3	0.0377535823787038	0.0403234167069608	0.520946	-0.0412803	0.116787479124347	1.03847530273307	0.95956011375918	1.1238805562287	0.998524067790455
ebi-a-GCST90001860	ukb-saige-740.1	Osteoarthritis; localized || id:ukb-saige-740.1	CD3 on CD39+ CD4+ T cell || id:ebi-a-GCST90001860	Weighted median	3	0.0146211634744867	0.0164912892150442	0.375295	-0.0177018	0.0469440903359733	1.01472857554317	0.982453992421549	1.0480634105684	0.974299104969666
ebi-a-GCST90001860	ukb-saige-740.1	Osteoarthritis; localized || id:ukb-saige-740.1	CD3 on CD39+ CD4+ T cell || id:ebi-a-GCST90001860	Weighted mode	3	0.0186021454580222	0.017165932517589	0.391768	-0.0150431	0.0522473731924966	1.01877624322094	0.985069499652356	1.05363635166622	0.974498079964075
ebi-a-GCST90001861	ieu-a-1169	Hip osteoarthritis || id:ieu-a-1169	CD3 on CD28+ CD4+ T cell || id:ebi-a-GCST90001861	Wald ratio	1	-0.042541	0.0600509580964414	0.478688	-0.160241	0.0751589218782902	0.958351214493709	0.851938588599034	1.0780554638708	1
ebi-a-GCST90001861	ieu-a-1170	Knee and hip osteoarthritis || id:ieu-a-1170	CD3 on CD28+ CD4+ T cell || id:ebi-a-GCST90001861	Wald ratio	1	-0.0641381	0.0496201305538008	0.196155	-0.161394	0.0331173215413771	0.937875437774053	0.850957076795062	1.03367180409701	1
ebi-a-GCST90001861	ieu-a-1171	Knee osteoarthritis || id:ieu-a-1171	CD3 on CD28+ CD4+ T cell || id:ebi-a-GCST90001861	Wald ratio	1	-0.0859591	0.0612981680353759	0.160822	-0.206104	0.0341852600547484	0.91763171635742	0.813748801196942	1.03477629168424	1
ebi-a-GCST90001861	ukb-saige-740.1	Osteoarthritis; localized || id:ukb-saige-740.1	CD3 on CD28+ CD4+ T cell || id:ebi-a-GCST90001861	Inverse variance weighted	2	0.0153930672501044	0.0204830130825	0.452349	-0.0247536	0.0555397728918045	1.01551215074528	0.975550220547134	1.05711106060016	1
ebi-a-GCST90001861	ukb-saige-740.1	Osteoarthritis; localized || id:ukb-saige-740.1	CD3 on CD28+ CD4+ T cell || id:ebi-a-GCST90001861	Bayesian Weighted Mendelian Randomization	2	0.0154323177853307	0.020622279632009	0.45426	-0.0249873	0.0558519858640684	1.01555201092299	0.975322249490589	1.05744115591374	1
ebi-a-GCST90001863	ieu-a-1169	Hip osteoarthritis || id:ieu-a-1169	CD3 on CD28+ CD45RA- CD8+ T cell || id:ebi-a-GCST90001863	Inverse variance weighted	2	-0.066878	0.0716197390401085	0.350411	-0.207253	0.0734966882581147	0.935309301867699	0.812814234998947	1.0762649723542	1
ebi-a-GCST90001863	ieu-a-1169	Hip osteoarthritis || id:ieu-a-1169	CD3 on CD28+ CD45RA- CD8+ T cell || id:ebi-a-GCST90001863	Bayesian Weighted Mendelian Randomization	2	-0.0671847	0.0724279937250645	0.353611	-0.209144	0.0747741303225344	0.935022451783951	0.81127872353198	1.07764071703232	1
ebi-a-GCST90001863	ieu-a-1170	Knee and hip osteoarthritis || id:ieu-a-1170	CD3 on CD28+ CD45RA- CD8+ T cell || id:ebi-a-GCST90001863	Inverse variance weighted	2	-0.0568282	0.0524037208769415	0.278174	-0.15954	0.0458830698942509	0.944756342815805	0.852536277955521	1.0469519835932	1
ebi-a-GCST90001863	ieu-a-1170	Knee and hip osteoarthritis || id:ieu-a-1170	CD3 on CD28+ CD45RA- CD8+ T cell || id:ebi-a-GCST90001863	Bayesian Weighted Mendelian Randomization	2	-0.0570628	0.053014884163967	0.281769	-0.160972	0.0468463677758052	0.944534745823641	0.851315926222705	1.04796099613288	1
ebi-a-GCST90001863	ieu-a-1171	Knee osteoarthritis || id:ieu-a-1171	CD3 on CD28+ CD45RA- CD8+ T cell || id:ebi-a-GCST90001863	Inverse variance weighted	2	-0.0724507	0.0670308379416878	0.279761	-0.203831	0.0589296986714392	0.93011155939132	0.81560004422335	1.06070066945269	1
ebi-a-GCST90001863	ieu-a-1171	Knee osteoarthritis || id:ieu-a-1171	CD3 on CD28+ CD45RA- CD8+ T cell || id:ebi-a-GCST90001863	Bayesian Weighted Mendelian Randomization	2	-0.0728443	0.0678570858155557	0.283048	-0.205844	0.0601555578205492	0.929745551899777	0.813959866233596	1.06200173637227	1
ebi-a-GCST90001863	ukb-saige-740.1	Osteoarthritis; localized || id:ukb-saige-740.1	CD3 on CD28+ CD45RA- CD8+ T cell || id:ebi-a-GCST90001863	Inverse variance weighted	5	0.00262895572595718	0.023501664140643	0.910932	-0.0434343	0.0486922174416174	1.00263241446035	0.957495453741076	1.04989716097225	1
ebi-a-GCST90001863	ukb-saige-740.1	Osteoarthritis; localized || id:ukb-saige-740.1	CD3 on CD28+ CD45RA- CD8+ T cell || id:ebi-a-GCST90001863	Bayesian Weighted Mendelian Randomization	5	0.00270072344541427	0.023753675928697	0.909478	-0.0438565	0.0492579282656605	1.00270437368433	0.957091308045319	1.05049126719066	1
ebi-a-GCST90001863	ukb-saige-740.1	Osteoarthritis; localized || id:ukb-saige-740.1	CD3 on CD28+ CD45RA- CD8+ T cell || id:ebi-a-GCST90001863	MR Egger	5	0.0146899426238484	0.0735710049509111	0.854506	-0.129509	0.158889112327634	1.0147983701116	0.87852648214477	1.1722079560619	0.998524067790455
ebi-a-GCST90001863	ukb-saige-740.1	Osteoarthritis; localized || id:ukb-saige-740.1	CD3 on CD28+ CD45RA- CD8+ T cell || id:ebi-a-GCST90001863	Weighted median	5	0.00733172057746631	0.0261820185353172	0.779455	-0.043985	0.0586484769066879	1.00735866344639	0.95696827767677	1.06040241927774	0.974299104969666
ebi-a-GCST90001863	ukb-saige-740.1	Osteoarthritis; localized || id:ukb-saige-740.1	CD3 on CD28+ CD45RA- CD8+ T cell || id:ebi-a-GCST90001863	Weighted mode	5	0.00738660065224428	0.0297018487934065	0.815846	-0.050829	0.0656022242873211	1.00741394888219	0.950441160235599	1.06780188702143	0.978812160446256
ebi-a-GCST90001864	ukb-saige-740.1	Osteoarthritis; localized || id:ukb-saige-740.1	CD3 on CD28+ CD45RA+ CD8+ T cell || id:ebi-a-GCST90001864	Inverse variance weighted	2	0.0100025970439784	0.0336009477852959	0.765941	-0.0558553	0.0758604547031583	1.01005279023228	0.945676002547987	1.07881202050936	1
ebi-a-GCST90001864	ukb-saige-740.1	Osteoarthritis; localized || id:ukb-saige-740.1	CD3 on CD28+ CD45RA+ CD8+ T cell || id:ebi-a-GCST90001864	Bayesian Weighted Mendelian Randomization	2	0.0100430799609259	0.0344045891377471	0.770355	-0.0573899	0.0774760746709102	1.01009368094318	0.944225830002649	1.08055637948231	1
ebi-a-GCST90001865	ukb-saige-740.1	Osteoarthritis; localized || id:ukb-saige-740.1	CD3 on CD28- CD8+ T cell || id:ebi-a-GCST90001865	Inverse variance weighted	2	0.0124680156199295	0.0374057904979832	0.738894	-0.0608473	0.0857833649959766	1.01254606536452	0.940966882690617	1.08957026367767	1
ebi-a-GCST90001865	ukb-saige-740.1	Osteoarthritis; localized || id:ukb-saige-740.1	CD3 on CD28- CD8+ T cell || id:ebi-a-GCST90001865	Bayesian Weighted Mendelian Randomization	2	0.012625954742365	0.0381607650161674	0.740749	-0.0621691	0.087421054174053	1.01270599863103	0.939723924036434	1.09136	1
ebi-a-GCST90001866	ieu-a-1169	Hip osteoarthritis || id:ieu-a-1169	CD3 on CD39+ CD8+ T cell || id:ebi-a-GCST90001866	Wald ratio	1	-0.057788	0.0815737986270023	0.478688	-0.217673	0.102096601830664	0.943849981395899	0.804388684018863	1.10749045216572	1
ebi-a-GCST90001866	ieu-a-1170	Knee and hip osteoarthritis || id:ieu-a-1170	CD3 on CD39+ CD8+ T cell || id:ebi-a-GCST90001866	Wald ratio	1	-0.057788	0.059600114416476	0.332248	-0.174604	0.059028180778032	0.943849981395899	0.839789286737627	1.06080513463297	1
ebi-a-GCST90001866	ieu-a-1171	Knee osteoarthritis || id:ieu-a-1171	CD3 on CD39+ CD8+ T cell || id:ebi-a-GCST90001866	Wald ratio	1	-0.0871259	0.0752931922196796	0.247209	-0.234701	0.0604487986270023	0.916561731633877	0.790807649296356	1.06231320428322	1
ebi-a-GCST90001866	ukb-saige-740.1	Osteoarthritis; localized || id:ukb-saige-740.1	CD3 on CD39+ CD8+ T cell || id:ebi-a-GCST90001866	Wald ratio	1	0.00943935926773455	0.0314645308924485	0.764177	-0.0522311	0.0711098398169336	1.0094840505277	0.949109482091873	1.07369915431017	1
ebi-a-GCST90001867	ukb-saige-740.1	Osteoarthritis; localized || id:ukb-saige-740.1	CD3 on CD4+ T cell || id:ebi-a-GCST90001867	Inverse variance weighted	2	0.0077759906347035	0.0402083805394522	0.846652	-0.0710324	0.0865844164920298	1.00780630216634	0.93143168044372	1.09044341524043	1
ebi-a-GCST90001867	ukb-saige-740.1	Osteoarthritis; localized || id:ukb-saige-740.1	CD3 on CD4+ T cell || id:ebi-a-GCST90001867	Bayesian Weighted Mendelian Randomization	2	0.00773500985074017	0.0416274506540336	0.85259	-0.0738548	0.089324813132646	1.00776500232025	0.928806552862494	1.09343576094675	1
ebi-a-GCST90001868	ukb-saige-740.1	Osteoarthritis; localized || id:ukb-saige-740.1	CD3 on CD4 regulatory T cell || id:ebi-a-GCST90001868	Inverse variance weighted	3	0.0111093103852008	0.0215577571066847	0.606324	-0.0311439	0.0533625143143028	1.01117124792243	0.969336081836275	1.0548119602523	1
ebi-a-GCST90001868	ukb-saige-740.1	Osteoarthritis; localized || id:ukb-saige-740.1	CD3 on CD4 regulatory T cell || id:ebi-a-GCST90001868	Bayesian Weighted Mendelian Randomization	3	0.00890671815034569	0.0258681967548735	0.730612	-0.0417949	0.0596083837898978	1.00894650098824	0.959066419388467	1.06142079555398	1
ebi-a-GCST90001868	ukb-saige-740.1	Osteoarthritis; localized || id:ukb-saige-740.1	CD3 on CD4 regulatory T cell || id:ebi-a-GCST90001868	MR Egger	3	0.12974470756195	0.0613069880212666	0.281019	0.00958301104026706	0.249906404083632	1.1385376861581	1.00962907511717	1.28390524277621	0.998524067790455
ebi-a-GCST90001868	ukb-saige-740.1	Osteoarthritis; localized || id:ukb-saige-740.1	CD3 on CD4 regulatory T cell || id:ebi-a-GCST90001868	Weighted median	3	0.019615168847929	0.0167750053516458	0.242279	-0.0132638	0.0524941793371547	1.01980881030341	0.986823735475638	1.0538964276849	0.974299104969666
ebi-a-GCST90001868	ukb-saige-740.1	Osteoarthritis; localized || id:ukb-saige-740.1	CD3 on CD4 regulatory T cell || id:ebi-a-GCST90001868	Weighted mode	3	0.019754181565742	0.0159280073698354	0.340659	-0.0114647	0.0509730760106194	1.0199505865519	0.988600756506809	1.05229456093421	0.974498079964075
ebi-a-GCST90001869	ukb-saige-740.1	Osteoarthritis; localized || id:ukb-saige-740.1	CD3 on resting CD4 regulatory T cell || id:ebi-a-GCST90001869	Inverse variance weighted	5	0.0134592216634017	0.0175135537041573	0.442188	-0.0208673	0.0477857869235499	1.01355020471608	0.979348872851689	1.04894593332073	1
ebi-a-GCST90001869	ukb-saige-740.1	Osteoarthritis; localized || id:ukb-saige-740.1	CD3 on resting CD4 regulatory T cell || id:ebi-a-GCST90001869	Bayesian Weighted Mendelian Randomization	5	0.0134525949580603	0.0187666644171922	0.473476	-0.0233301	0.050235257215757	1.01354348823978	0.976939974612014	1.05151844458125	1
[truncated: 776 more rows]

## Sheet: heterogeneity
id.exposure	id.outcome	outcome	exposure	method	Q	Q_df	Q_pval
[truncated: 1,017 more rows]

## Sheet: pleiotropy
id.exposure	id.outcome	outcome	exposure	egger_intercept	se	pval
[truncated: 679 more rows]

[truncated: 4 more sheets: leaveoneout, singlesnp, steiger_test, mr_presso]
