# Supplementary material for: Integrative Genomics Establishes GNL3 as a Pleiotropic Hub and Causal Gene for Osteoarthritis
Source: Research Square preprint supplement (doi:10.21203/rs.3.rs-7630649/v1), 2025-09-29
Supplement: Supplementary file 6 [file 81a3d675ffb93fa12295b224.xlsx]

## Sheet: Exposures
DOI	OBO_OntologyID	QTLtype	beta	cellState	cellTypeName	geneName	inGTEx	loci	pValue	se	study	studyName	variantId
10.1038/s41467-020-14457-z	CLO_0037307	Cell-type-specific eQTL	0.44439	-	Mesendoderm (mesendo)	GNL3	1	chr3:52778215-52778216	4.21789e-04	0.12603	cuomo2020NC	Cuomo-2020-Nat. Commun	rs62255400
10.1038/s41467-020-14457-z	CLO_0037307	Cell-type-specific eQTL	0.35684	-	Definitive Endoderm (defendo)	GNL3	1	chr3:52611713-52611714	1.06614e-03	0.10904	cuomo2020NC	Cuomo-2020-Nat. Commun	rs79991889
10.1038/s41588-022-01066-3	CL_0000895	Cell-type-specific eQTL	-0.20514	After Acquiring Effector Functions (5 D)	Naive T Cell	GNL3	1	chr3:52666461-52666462	7.47114e-04	0.05831	Soskic2022NG	Soskic-2022-Nat. Genet	rs35976524
10.1038/s41588-022-01066-3	CL_0000895	Cell-type-specific eQTL	-0.20514	After Acquiring Effector Functions (5 D)	Naive T Cell	GNL3	1	chr3:52616332-52616333	7.47114e-04	0.05831	Soskic2022NG	Soskic-2022-Nat. Genet	rs10510760
10.1038/s41588-022-01066-3	CL_0000895	Cell-type-specific eQTL	-0.20692	After Acquiring Effector Functions (5 D)	Naive T Cell	GNL3	1	chr3:52532804-52532805	6.57950e-04	0.05817	Soskic2022NG	Soskic-2022-Nat. Genet	rs12489732
10.1038/s41588-022-01066-3	CL_0000895	Cell-type-specific eQTL	-0.2177	After Acquiring Effector Functions (5 D)	Naive T Cell	GNL3	1	chr3:52506528-52506529	3.19290e-04	0.05765	Soskic2022NG	Soskic-2022-Nat. Genet	rs1010552
10.1038/s41588-022-01066-3	CL_0000895	Cell-type-specific eQTL	-0.21975	After Acquiring Effector Functions (5 D)	Naive T Cell	GNL3	1	chr3:52502498-52502499	2.76127e-04	0.05754	Soskic2022NG	Soskic-2022-Nat. Genet	rs731831
10.1038/s41588-022-01066-3	CL_0000895	Cell-type-specific eQTL	-0.16535	Harvested After 5 D Stimulation	CD4+ Naive T	GNL3	1	chr3:52942453-52942454	2.04620e-04	0.04212	Soskic2022NG	Soskic-2022-Nat. Genet	rs7621939
10.1038/s41588-022-01066-3	CL_0000895	Cell-type-specific eQTL	-0.16535	Harvested After 5 D Stimulation	CD4+ Naive T	GNL3	1	chr3:52942059-52942060	2.04620e-04	0.04212	Soskic2022NG	Soskic-2022-Nat. Genet	rs2710345
10.1038/s41588-022-01066-3	CL_0000895	Cell-type-specific eQTL	-0.16535	Harvested After 5 D Stimulation	CD4+ Naive T	GNL3	1	chr3:52941580-52941581	2.04620e-04	0.04212	Soskic2022NG	Soskic-2022-Nat. Genet	rs11706243
10.1038/s41588-022-01066-3	CL_0000895	Cell-type-specific eQTL	-0.12892	Harvested After 5 D Stimulation	CD4+ Naive T	GNL3	1	chr3:52940136-52940137	1.15480e-03	0.03799	Soskic2022NG	Soskic-2022-Nat. Genet	rs2710346
10.1038/s41588-022-01066-3	CL_0000895	Cell-type-specific eQTL	-0.16535	Harvested After 5 D Stimulation	CD4+ Naive T	GNL3	1	chr3:52939357-52939358	2.04620e-04	0.04212	Soskic2022NG	Soskic-2022-Nat. Genet	rs2581802
10.1038/s41588-022-01066-3	CL_0000895	Cell-type-specific eQTL	-0.16535	Harvested After 5 D Stimulation	CD4+ Naive T	GNL3	1	chr3:52938891-52938892	2.04620e-04	0.04212	Soskic2022NG	Soskic-2022-Nat. Genet	rs2581801
10.1038/s41588-022-01066-3	CL_0000895	Cell-type-specific eQTL	-0.16497	Harvested After 5 D Stimulation	CD4+ Naive T	GNL3	1	chr3:52938452-52938453	1.69930e-04	0.04145	Soskic2022NG	Soskic-2022-Nat. Genet	rs2581797
10.1038/s41588-022-01066-3	CL_0000895	Cell-type-specific eQTL	-0.13644	Harvested After 5 D Stimulation	CD4+ Naive T	GNL3	1	chr3:52935513-52935514	9.47670e-04	0.03947	Soskic2022NG	Soskic-2022-Nat. Genet	rs2710313
10.1038/s41588-022-01066-3	CL_0000895	Cell-type-specific eQTL	-0.12892	Harvested After 5 D Stimulation	CD4+ Naive T	GNL3	1	chr3:52935112-52935113	1.15480e-03	0.03799	Soskic2022NG	Soskic-2022-Nat. Genet	rs2710314
10.1038/s41588-022-01066-3	CL_0000895	Cell-type-specific eQTL	-0.12892	Harvested After 5 D Stimulation	CD4+ Naive T	GNL3	1	chr3:52932542-52932543	1.15480e-03	0.03799	Soskic2022NG	Soskic-2022-Nat. Genet	rs2581827
10.1038/s41588-022-01066-3	CL_0000895	Cell-type-specific eQTL	-0.12892	Harvested After 5 D Stimulation	CD4+ Naive T	GNL3	1	chr3:52931697-52931698	1.15480e-03	0.03799	Soskic2022NG	Soskic-2022-Nat. Genet	rs2710339
10.1038/s41588-022-01066-3	CL_0000895	Cell-type-specific eQTL	-0.16535	Harvested After 5 D Stimulation	CD4+ Naive T	GNL3	1	chr3:52928732-52928733	2.04620e-04	0.04212	Soskic2022NG	Soskic-2022-Nat. Genet	rs13082061
10.1038/s41588-022-01066-3	CL_0000895	Cell-type-specific eQTL	-0.16535	Harvested After 5 D Stimulation	CD4+ Naive T	GNL3	0	chr3:52928609-52928610	2.04620e-04	0.04212	Soskic2022NG	Soskic-2022-Nat. Genet	rs9825679
10.1038/s41588-022-01066-3	CL_0000895	Cell-type-specific eQTL	-0.16497	Harvested After 5 D Stimulation	CD4+ Naive T	GNL3	1	chr3:52926245-52926246	1.69930e-04	0.04145	Soskic2022NG	Soskic-2022-Nat. Genet	rs34585187
10.1038/s41588-022-01066-3	CL_0000895	Cell-type-specific eQTL	-0.17484	Harvested After 5 D Stimulation	CD4+ Naive T	GNL3	1	chr3:52925521-52925522	1.86363e-04	0.04423	Soskic2022NG	Soskic-2022-Nat. Genet	rs9847024
10.1038/s41588-022-01066-3	CL_0000895	Cell-type-specific eQTL	-0.17484	Harvested After 5 D Stimulation	CD4+ Naive T	GNL3	1	chr3:52924423-52924424	1.86363e-04	0.04423	Soskic2022NG	Soskic-2022-Nat. Genet	rs2710342
10.1038/s41588-022-01066-3	CL_0000895	Cell-type-specific eQTL	-0.13967	Harvested After 5 D Stimulation	CD4+ Naive T	GNL3	1	chr3:52919828-52919829	1.08161e-03	0.0409	Soskic2022NG	Soskic-2022-Nat. Genet	rs9985365
10.1038/s41588-022-01066-3	CL_0000895	Cell-type-specific eQTL	-0.13225	Harvested After 5 D Stimulation	CD4+ Naive T	GNL3	0	chr3:52919295-52919296	1.28651e-03	0.03937	Soskic2022NG	Soskic-2022-Nat. Genet	rs9825369
10.1038/s41588-022-01066-3	CL_0000895	Cell-type-specific eQTL	-0.13225	Harvested After 5 D Stimulation	CD4+ Naive T	GNL3	1	chr3:52919039-52919040	1.28651e-03	0.03937	Soskic2022NG	Soskic-2022-Nat. Genet	rs9880619
10.1038/s41588-022-01066-3	CL_0000895	Cell-type-specific eQTL	-0.17484	Harvested After 5 D Stimulation	CD4+ Naive T	GNL3	1	chr3:52917503-52917504	1.86363e-04	0.04423	Soskic2022NG	Soskic-2022-Nat. Genet	rs2336162
10.1038/s41588-022-01066-3	CL_0000895	Cell-type-specific eQTL	-0.17484	Harvested After 5 D Stimulation	CD4+ Naive T	GNL3	0	chr3:52916705-52916706	1.86363e-04	0.04423	Soskic2022NG	Soskic-2022-Nat. Genet	rs2336160
10.1038/s41588-022-01066-3	CL_0000895	Cell-type-specific eQTL	-0.13225	Harvested After 5 D Stimulation	CD4+ Naive T	GNL3	1	chr3:52916643-52916644	1.28651e-03	0.03937	Soskic2022NG	Soskic-2022-Nat. Genet	rs12629687
10.1038/s41588-022-01066-3	CL_0000895	Cell-type-specific eQTL	-0.13225	Harvested After 5 D Stimulation	CD4+ Naive T	GNL3	1	chr3:52914658-52914659	1.28651e-03	0.03937	Soskic2022NG	Soskic-2022-Nat. Genet	rs4687689
10.1038/s41588-022-01066-3	CL_0000895	Cell-type-specific eQTL	-0.13225	Harvested After 5 D Stimulation	CD4+ Naive T	GNL3	1	chr3:52914316-52914317	1.28651e-03	0.03937	Soskic2022NG	Soskic-2022-Nat. Genet	rs4687687
10.1038/s41588-022-01066-3	CL_0000895	Cell-type-specific eQTL	-0.13225	Harvested After 5 D Stimulation	CD4+ Naive T	GNL3	1	chr3:52911914-52911915	1.28651e-03	0.03937	Soskic2022NG	Soskic-2022-Nat. Genet	rs9871175
10.1038/s41588-022-01066-3	CL_0000895	Cell-type-specific eQTL	-0.13225	Harvested After 5 D Stimulation	CD4+ Naive T	GNL3	1	chr3:52910708-52910709	1.28651e-03	0.03937	Soskic2022NG	Soskic-2022-Nat. Genet	rs9865248
10.1038/s41588-022-01066-3	CL_0000895	Cell-type-specific eQTL	-0.13225	Harvested After 5 D Stimulation	CD4+ Naive T	GNL3	1	chr3:52904076-52904077	1.28651e-03	0.03937	Soskic2022NG	Soskic-2022-Nat. Genet	rs7626551
10.1038/s41588-022-01066-3	CL_0000895	Cell-type-specific eQTL	-0.17484	Harvested After 5 D Stimulation	CD4+ Naive T	GNL3	1	chr3:52903758-52903759	1.86363e-04	0.04423	Soskic2022NG	Soskic-2022-Nat. Genet	rs1134546
10.1038/s41588-022-01066-3	CL_0000895	Cell-type-specific eQTL	-0.13225	Harvested After 5 D Stimulation	CD4+ Naive T	GNL3	1	chr3:52902747-52902748	1.28651e-03	0.03937	Soskic2022NG	Soskic-2022-Nat. Genet	rs11922975
10.1038/s41588-022-01066-3	CL_0000895	Cell-type-specific eQTL	-0.17484	Harvested After 5 D Stimulation	CD4+ Naive T	GNL3	1	chr3:52901412-52901413	1.86363e-04	0.04423	Soskic2022NG	Soskic-2022-Nat. Genet	rs6773040
10.1038/s41588-022-01066-3	CL_0000895	Cell-type-specific eQTL	-0.17484	Harvested After 5 D Stimulation	CD4+ Naive T	GNL3	1	chr3:52897955-52897956	1.86363e-04	0.04423	Soskic2022NG	Soskic-2022-Nat. Genet	rs9844736
10.1038/s41588-022-01066-3	CL_0000895	Cell-type-specific eQTL	-0.13225	Harvested After 5 D Stimulation	CD4+ Naive T	GNL3	1	chr3:52894318-52894319	1.28651e-03	0.03937	Soskic2022NG	Soskic-2022-Nat. Genet	rs62253583
10.1038/s41588-022-01066-3	CL_0000895	Cell-type-specific eQTL	-0.13225	Harvested After 5 D Stimulation	CD4+ Naive T	GNL3	1	chr3:52894317-52894318	1.28651e-03	0.03937	Soskic2022NG	Soskic-2022-Nat. Genet	rs62253582
10.1038/s41588-022-01066-3	CL_0000895	Cell-type-specific eQTL	-0.17484	Harvested After 5 D Stimulation	CD4+ Naive T	GNL3	1	chr3:52891387-52891388	1.86363e-04	0.04423	Soskic2022NG	Soskic-2022-Nat. Genet	rs9836178
10.1038/s41588-022-01066-3	CL_0000895	Cell-type-specific eQTL	-0.13225	Harvested After 5 D Stimulation	CD4+ Naive T	GNL3	1	chr3:52890211-52890212	1.28651e-03	0.03937	Soskic2022NG	Soskic-2022-Nat. Genet	rs9810807
10.1038/s41588-022-01066-3	CL_0000895	Cell-type-specific eQTL	-0.13225	Harvested After 5 D Stimulation	CD4+ Naive T	GNL3	1	chr3:52889235-52889236	1.28651e-03	0.03937	Soskic2022NG	Soskic-2022-Nat. Genet	rs9880978
10.1038/s41588-022-01066-3	CL_0000895	Cell-type-specific eQTL	-0.13967	Harvested After 5 D Stimulation	CD4+ Naive T	GNL3	1	chr3:52888605-52888606	1.08161e-03	0.0409	Soskic2022NG	Soskic-2022-Nat. Genet	rs6795646
10.1038/s41588-022-01066-3	CL_0000895	Cell-type-specific eQTL	-0.13967	Harvested After 5 D Stimulation	CD4+ Naive T	GNL3	1	chr3:52885431-52885432	1.08161e-03	0.0409	Soskic2022NG	Soskic-2022-Nat. Genet	rs12638968
10.1038/s41588-022-01066-3	CL_0000895	Cell-type-specific eQTL	-0.13225	Harvested After 5 D Stimulation	CD4+ Naive T	GNL3	1	chr3:52885080-52885081	1.28651e-03	0.03937	Soskic2022NG	Soskic-2022-Nat. Genet	rs2336668
10.1038/s41588-022-01066-3	CL_0000895	Cell-type-specific eQTL	-0.17302	Harvested After 5 D Stimulation	CD4+ Naive T	GNL3	1	chr3:52884986-52884987	2.01253e-04	0.04402	Soskic2022NG	Soskic-2022-Nat. Genet	rs2878762
10.1038/s41588-022-01066-3	CL_0000895	Cell-type-specific eQTL	-0.13225	Harvested After 5 D Stimulation	CD4+ Naive T	GNL3	1	chr3:52884497-52884498	1.28651e-03	0.03937	Soskic2022NG	Soskic-2022-Nat. Genet	rs4687684
10.1038/s41588-022-01066-3	CL_0000895	Cell-type-specific eQTL	-0.13225	Harvested After 5 D Stimulation	CD4+ Naive T	GNL3	1	chr3:52884483-52884484	1.28651e-03	0.03937	Soskic2022NG	Soskic-2022-Nat. Genet	rs4687683
10.1038/s41588-022-01066-3	CL_0000895	Cell-type-specific eQTL	-0.13967	Harvested After 5 D Stimulation	CD4+ Naive T	GNL3	1	chr3:52884406-52884407	1.08161e-03	0.0409	Soskic2022NG	Soskic-2022-Nat. Genet	rs4687562
10.1038/s41588-022-01066-3	CL_0000895	Cell-type-specific eQTL	-0.13225	Harvested After 5 D Stimulation	CD4+ Naive T	GNL3	1	chr3:52882923-52882924	1.28651e-03	0.03937	Soskic2022NG	Soskic-2022-Nat. Genet	rs4687682
10.1038/s41588-022-01066-3	CL_0000895	Cell-type-specific eQTL	-0.17484	Harvested After 5 D Stimulation	CD4+ Naive T	GNL3	1	chr3:52882900-52882901	1.86363e-04	0.04423	Soskic2022NG	Soskic-2022-Nat. Genet	rs9876403
10.1038/s41588-022-01066-3	CL_0000895	Cell-type-specific eQTL	-0.13225	Harvested After 5 D Stimulation	CD4+ Naive T	GNL3	1	chr3:52882347-52882348	1.28651e-03	0.03937	Soskic2022NG	Soskic-2022-Nat. Genet	rs2336667
10.1038/s41588-022-01066-3	CL_0000895	Cell-type-specific eQTL	-0.17484	Harvested After 5 D Stimulation	CD4+ Naive T	GNL3	1	chr3:52881696-52881697	1.86363e-04	0.04423	Soskic2022NG	Soskic-2022-Nat. Genet	rs2336666
10.1038/s41588-022-01066-3	CL_0000895	Cell-type-specific eQTL	-0.13225	Harvested After 5 D Stimulation	CD4+ Naive T	GNL3	1	chr3:52881203-52881204	1.28651e-03	0.03937	Soskic2022NG	Soskic-2022-Nat. Genet	rs9866243
10.1038/s41588-022-01066-3	CL_0000895	Cell-type-specific eQTL	-0.13967	Harvested After 5 D Stimulation	CD4+ Naive T	GNL3	1	chr3:52879765-52879766	1.08161e-03	0.0409	Soskic2022NG	Soskic-2022-Nat. Genet	rs9860296
10.1038/s41588-022-01066-3	CL_0000895	Cell-type-specific eQTL	-0.13967	Harvested After 5 D Stimulation	CD4+ Naive T	GNL3	1	chr3:52878280-52878281	1.08161e-03	0.0409	Soskic2022NG	Soskic-2022-Nat. Genet	rs12492391
10.1038/s41588-022-01066-3	CL_0000895	Cell-type-specific eQTL	-0.13225	Harvested After 5 D Stimulation	CD4+ Naive T	GNL3	1	chr3:52878198-52878199	1.28651e-03	0.03937	Soskic2022NG	Soskic-2022-Nat. Genet	rs9850563
10.1038/s41588-022-01066-3	CL_0000895	Cell-type-specific eQTL	-0.17484	Harvested After 5 D Stimulation	CD4+ Naive T	GNL3	1	chr3:52875861-52875862	1.86363e-04	0.04423	Soskic2022NG	Soskic-2022-Nat. Genet	rs9839035
10.1038/s41588-022-01066-3	CL_0000895	Cell-type-specific eQTL	-0.17484	Harvested After 5 D Stimulation	CD4+ Naive T	GNL3	1	chr3:52874561-52874562	1.86363e-04	0.04423	Soskic2022NG	Soskic-2022-Nat. Genet	rs6445547
10.1038/s41588-022-01066-3	CL_0000895	Cell-type-specific eQTL	-0.13225	Harvested After 5 D Stimulation	CD4+ Naive T	GNL3	1	chr3:52874382-52874383	1.28651e-03	0.03937	Soskic2022NG	Soskic-2022-Nat. Genet	rs56383738
10.1038/s41588-022-01066-3	CL_0000895	Cell-type-specific eQTL	-0.13967	Harvested After 5 D Stimulation	CD4+ Naive T	GNL3	1	chr3:52873356-52873357	1.08161e-03	0.0409	Soskic2022NG	Soskic-2022-Nat. Genet	rs4687680
10.1038/s41588-022-01066-3	CL_0000895	Cell-type-specific eQTL	-0.17484	Harvested After 5 D Stimulation	CD4+ Naive T	GNL3	1	chr3:52871901-52871902	1.86363e-04	0.04423	Soskic2022NG	Soskic-2022-Nat. Genet	rs6797399
10.1038/s41588-022-01066-3	CL_0000895	Cell-type-specific eQTL	-0.17484	Harvested After 5 D Stimulation	CD4+ Naive T	GNL3	1	chr3:52871786-52871787	1.86363e-04	0.04423	Soskic2022NG	Soskic-2022-Nat. Genet	rs4302374
10.1038/s41588-022-01066-3	CL_0000895	Cell-type-specific eQTL	-0.13225	Harvested After 5 D Stimulation	CD4+ Naive T	GNL3	1	chr3:52871197-52871198	1.28651e-03	0.03937	Soskic2022NG	Soskic-2022-Nat. Genet	rs2336664
10.1038/s41588-022-01066-3	CL_0000895	Cell-type-specific eQTL	-0.13225	Harvested After 5 D Stimulation	CD4+ Naive T	GNL3	1	chr3:52870508-52870509	1.28651e-03	0.03937	Soskic2022NG	Soskic-2022-Nat. Genet	rs9836499
10.1038/s41588-022-01066-3	CL_0000895	Cell-type-specific eQTL	-0.13784	Harvested After 5 D Stimulation	CD4+ Naive T	GNL3	1	chr3:52869430-52869431	5.88391e-04	0.03823	Soskic2022NG	Soskic-2022-Nat. Genet	rs10865977
10.1038/s41588-022-01066-3	CL_0000895	Cell-type-specific eQTL	-0.13967	Harvested After 5 D Stimulation	CD4+ Naive T	GNL3	1	chr3:52867958-52867959	1.08161e-03	0.0409	Soskic2022NG	Soskic-2022-Nat. Genet	rs9825230
10.1038/s41588-022-01066-3	CL_0000895	Cell-type-specific eQTL	-0.13225	Harvested After 5 D Stimulation	CD4+ Naive T	GNL3	1	chr3:52865268-52865269	1.28651e-03	0.03937	Soskic2022NG	Soskic-2022-Nat. Genet	rs4687679
10.1038/s41588-022-01066-3	CL_0000895	Cell-type-specific eQTL	-0.17484	Harvested After 5 D Stimulation	CD4+ Naive T	GNL3	1	chr3:52864105-52864106	1.86363e-04	0.04423	Soskic2022NG	Soskic-2022-Nat. Genet	rs4687560
10.1038/s41588-022-01066-3	CL_0000895	Cell-type-specific eQTL	-0.17484	Harvested After 5 D Stimulation	CD4+ Naive T	GNL3	1	chr3:52863826-52863827	1.86363e-04	0.04423	Soskic2022NG	Soskic-2022-Nat. Genet	rs4687559
10.1038/s41588-022-01066-3	CL_0000895	Cell-type-specific eQTL	-0.13225	Harvested After 5 D Stimulation	CD4+ Naive T	GNL3	1	chr3:52863807-52863808	1.28651e-03	0.03937	Soskic2022NG	Soskic-2022-Nat. Genet	rs6764322
10.1038/s41588-022-01066-3	CL_0000895	Cell-type-specific eQTL	-0.13225	Harvested After 5 D Stimulation	CD4+ Naive T	GNL3	1	chr3:52863785-52863786	1.28651e-03	0.03937	Soskic2022NG	Soskic-2022-Nat. Genet	rs4350911
10.1038/s41588-022-01066-3	CL_0000895	Cell-type-specific eQTL	-0.13225	Harvested After 5 D Stimulation	CD4+ Naive T	GNL3	1	chr3:52863079-52863080	1.28651e-03	0.03937	Soskic2022NG	Soskic-2022-Nat. Genet	rs6773650
10.1038/s41588-022-01066-3	CL_0000895	Cell-type-specific eQTL	-0.13784	Harvested After 5 D Stimulation	CD4+ Naive T	GNL3	1	chr3:52862016-52862017	5.88391e-04	0.03823	Soskic2022NG	Soskic-2022-Nat. Genet	rs13072537
10.1038/s41588-022-01066-3	CL_0000895	Cell-type-specific eQTL	-0.14571	Harvested After 5 D Stimulation	CD4+ Naive T	GNL3	1	chr3:52861769-52861770	4.72393e-04	0.03966	Soskic2022NG	Soskic-2022-Nat. Genet	rs12487379
10.1038/s41588-022-01066-3	CL_0000895	Cell-type-specific eQTL	-0.17884	Harvested After 5 D Stimulation	CD4+ Naive T	GNL3	0	chr3:52859449-52859450	4.87534e-05	0.04122	Soskic2022NG	Soskic-2022-Nat. Genet	rs6798941
10.1038/s41588-022-01066-3	CL_0000895	Cell-type-specific eQTL	-0.14042	Harvested After 5 D Stimulation	CD4+ Naive T	GNL3	0	chr3:52859410-52859411	3.22428e-04	0.03705	Soskic2022NG	Soskic-2022-Nat. Genet	rs7612624
10.1038/s41588-022-01066-3	CL_0000895	Cell-type-specific eQTL	-0.18329	Harvested After 5 D Stimulation	CD4+ Naive T	GNL3	0	chr3:52857740-52857741	6.62280e-05	0.04311	Soskic2022NG	Soskic-2022-Nat. Genet	rs7620706
10.1038/s41588-022-01066-3	CL_0000895	Cell-type-specific eQTL	-0.14042	Harvested After 5 D Stimulation	CD4+ Naive T	GNL3	1	chr3:52857691-52857692	3.22428e-04	0.03705	Soskic2022NG	Soskic-2022-Nat. Genet	rs7620690
10.1038/s41588-022-01066-3	CL_0000895	Cell-type-specific eQTL	-0.14042	Harvested After 5 D Stimulation	CD4+ Naive T	GNL3	1	chr3:52857554-52857555	3.22428e-04	0.03705	Soskic2022NG	Soskic-2022-Nat. Genet	rs7630552
10.1038/s41588-022-01066-3	CL_0000895	Cell-type-specific eQTL	-0.18329	Harvested After 5 D Stimulation	CD4+ Naive T	GNL3	1	chr3:52855755-52855756	6.62280e-05	0.04311	Soskic2022NG	Soskic-2022-Nat. Genet	rs6803519
10.1038/s41588-022-01066-3	CL_0000895	Cell-type-specific eQTL	-0.18329	Harvested After 5 D Stimulation	CD4+ Naive T	GNL3	1	chr3:52854469-52854470	6.62280e-05	0.04311	Soskic2022NG	Soskic-2022-Nat. Genet	rs9682464
10.1038/s41588-022-01066-3	CL_0000895	Cell-type-specific eQTL	-0.18329	Harvested After 5 D Stimulation	CD4+ Naive T	GNL3	1	chr3:52852589-52852590	6.62280e-05	0.04311	Soskic2022NG	Soskic-2022-Nat. Genet	rs2276825
10.1038/s41588-022-01066-3	CL_0000895	Cell-type-specific eQTL	-0.18329	Harvested After 5 D Stimulation	CD4+ Naive T	GNL3	1	chr3:52852225-52852226	6.62280e-05	0.04311	Soskic2022NG	Soskic-2022-Nat. Genet	rs12496077
10.1038/s41588-022-01066-3	CL_0000895	Cell-type-specific eQTL	-0.14042	Harvested After 5 D Stimulation	CD4+ Naive T	GNL3	1	chr3:52852224-52852225	3.22428e-04	0.03705	Soskic2022NG	Soskic-2022-Nat. Genet	rs2336558
10.1038/s41588-022-01066-3	CL_0000895	Cell-type-specific eQTL	-0.14042	Harvested After 5 D Stimulation	CD4+ Naive T	GNL3	1	chr3:52849054-52849055	3.22428e-04	0.03705	Soskic2022NG	Soskic-2022-Nat. Genet	rs11715347
10.1038/s41588-022-01066-3	CL_0000895	Cell-type-specific eQTL	-0.17768	Harvested After 5 D Stimulation	CD4+ Naive T	GNL3	0	chr3:52847080-52847081	8.82609e-05	0.04261	Soskic2022NG	Soskic-2022-Nat. Genet	rs2001735
10.1038/s41588-022-01066-3	CL_0000895	Cell-type-specific eQTL	-0.18329	Harvested After 5 D Stimulation	CD4+ Naive T	GNL3	1	chr3:52846527-52846528	6.62280e-05	0.04311	Soskic2022NG	Soskic-2022-Nat. Genet	rs4687672
10.1038/s41588-022-01066-3	CL_0000895	Cell-type-specific eQTL	-0.14777	Harvested After 5 D Stimulation	CD4+ Naive T	GNL3	1	chr3:52846112-52846113	2.59367e-04	0.03833	Soskic2022NG	Soskic-2022-Nat. Genet	rs6445541
10.1038/s41588-022-01066-3	CL_0000895	Cell-type-specific eQTL	-0.14042	Harvested After 5 D Stimulation	CD4+ Naive T	GNL3	1	chr3:52844584-52844585	3.22428e-04	0.03705	Soskic2022NG	Soskic-2022-Nat. Genet	rs56214994
10.1038/s41588-022-01066-3	CL_0000895	Cell-type-specific eQTL	-0.14042	Harvested After 5 D Stimulation	CD4+ Naive T	GNL3	1	chr3:52842373-52842374	3.22428e-04	0.03705	Soskic2022NG	Soskic-2022-Nat. Genet	rs11719137
10.1038/s41588-022-01066-3	CL_0000895	Cell-type-specific eQTL	-0.18353	Harvested After 5 D Stimulation	CD4+ Naive T	GNL3	1	chr3:52840845-52840846	7.72870e-05	0.04361	Soskic2022NG	Soskic-2022-Nat. Genet	rs7638524
10.1038/s41588-022-01066-3	CL_0000895	Cell-type-specific eQTL	-0.14042	Harvested After 5 D Stimulation	CD4+ Naive T	GNL3	1	chr3:52840737-52840738	3.22428e-04	0.03705	Soskic2022NG	Soskic-2022-Nat. Genet	rs56019197
10.1038/s41588-022-01066-3	CL_0000895	Cell-type-specific eQTL	-0.14042	Harvested After 5 D Stimulation	CD4+ Naive T	GNL3	1	chr3:52840430-52840431	3.22428e-04	0.03705	Soskic2022NG	Soskic-2022-Nat. Genet	rs6769789
10.1038/s41588-022-01066-3	CL_0000895	Cell-type-specific eQTL	-0.18353	Harvested After 5 D Stimulation	CD4+ Naive T	GNL3	1	chr3:52840280-52840281	7.72870e-05	0.04361	Soskic2022NG	Soskic-2022-Nat. Genet	rs6445539
10.1038/s41588-022-01066-3	CL_0000895	Cell-type-specific eQTL	-0.18353	Harvested After 5 D Stimulation	CD4+ Naive T	GNL3	1	chr3:52840272-52840273	7.72870e-05	0.04361	Soskic2022NG	Soskic-2022-Nat. Genet	rs6445538
10.1038/s41588-022-01066-3	CL_0000895	Cell-type-specific eQTL	-0.18329	Harvested After 5 D Stimulation	CD4+ Naive T	GNL3	1	chr3:52837913-52837914	6.62280e-05	0.04311	Soskic2022NG	Soskic-2022-Nat. Genet	rs3733047
10.1038/s41588-022-01066-3	CL_0000895	Cell-type-specific eQTL	-0.18329	Harvested After 5 D Stimulation	CD4+ Naive T	GNL3	1	chr3:52836602-52836603	6.62280e-05	0.04311	Soskic2022NG	Soskic-2022-Nat. Genet	rs4687663
10.1038/s41588-022-01066-3	CL_0000895	Cell-type-specific eQTL	-0.16233	Harvested After 5 D Stimulation	CD4+ Naive T	GNL3	1	chr3:52836116-52836117	2.21348e-04	0.0416	Soskic2022NG	Soskic-2022-Nat. Genet	rs1573815
10.1038/s41588-022-01066-3	CL_0000895	Cell-type-specific eQTL	-0.12671	Harvested After 5 D Stimulation	CD4+ Naive T	GNL3	1	chr3:52835247-52835248	7.96515e-04	0.03609	Soskic2022NG	Soskic-2022-Nat. Genet	rs2276823
10.1038/s41588-022-01066-3	CL_0000895	Cell-type-specific eQTL	-0.12671	Harvested After 5 D Stimulation	CD4+ Naive T	GNL3	1	chr3:52834594-52834595	7.96515e-04	0.03609	Soskic2022NG	Soskic-2022-Nat. Genet	rs11922961
10.1038/s41588-022-01066-3	CL_0000895	Cell-type-specific eQTL	-0.15595	Harvested After 5 D Stimulation	CD4+ Naive T	GNL3	1	chr3:52834429-52834430	3.28287e-04	0.04121	Soskic2022NG	Soskic-2022-Nat. Genet	rs13083728
10.1038/s41588-022-01066-3	CL_0000895	Cell-type-specific eQTL	-0.12671	Harvested After 5 D Stimulation	CD4+ Naive T	GNL3	1	chr3:52834129-52834130	7.96515e-04	0.03609	Soskic2022NG	Soskic-2022-Nat. Genet	rs11918800
10.1038/s41588-022-01066-3	CL_0000895	Cell-type-specific eQTL	-0.12671	Harvested After 5 D Stimulation	CD4+ Naive T	GNL3	1	chr3:52833579-52833580	7.96515e-04	0.03609	Soskic2022NG	Soskic-2022-Nat. Genet	rs60332615
10.1038/s41588-022-01066-3	CL_0000895	Cell-type-specific eQTL	-0.12671	Harvested After 5 D Stimulation	CD4+ Naive T	GNL3	1	chr3:52832829-52832830	7.96515e-04	0.03609	Soskic2022NG	Soskic-2022-Nat. Genet	rs11915546
10.1038/s41588-022-01066-3	CL_0000895	Cell-type-specific eQTL	-0.12671	Harvested After 5 D Stimulation	CD4+ Naive T	GNL3	1	chr3:52832519-52832520	7.96515e-04	0.03609	Soskic2022NG	Soskic-2022-Nat. Genet	rs7652667
10.1038/s41588-022-01066-3	CL_0000895	Cell-type-specific eQTL	-0.15595	Harvested After 5 D Stimulation	CD4+ Naive T	GNL3	1	chr3:52832141-52832142	3.28287e-04	0.04121	Soskic2022NG	Soskic-2022-Nat. Genet	rs3755803
10.1038/s41588-022-01066-3	CL_0000895	Cell-type-specific eQTL	-0.15595	Harvested After 5 D Stimulation	CD4+ Naive T	GNL3	1	chr3:52830844-52830845	3.28287e-04	0.04121	Soskic2022NG	Soskic-2022-Nat. Genet	rs2071040
10.1038/s41588-022-01066-3	CL_0000895	Cell-type-specific eQTL	-0.15595	Harvested After 5 D Stimulation	CD4+ Naive T	GNL3	1	chr3:52830677-52830678	3.28287e-04	0.04121	Soskic2022NG	Soskic-2022-Nat. Genet	rs2071041
10.1038/s41588-022-01066-3	CL_0000895	Cell-type-specific eQTL	-0.12671	Harvested After 5 D Stimulation	CD4+ Naive T	GNL3	1	chr3:52830568-52830569	7.96515e-04	0.03609	Soskic2022NG	Soskic-2022-Nat. Genet	rs2071042
10.1038/s41588-022-01066-3	CL_0000895	Cell-type-specific eQTL	-0.15595	Harvested After 5 D Stimulation	CD4+ Naive T	GNL3	1	chr3:52830119-52830120	3.28287e-04	0.04121	Soskic2022NG	Soskic-2022-Nat. Genet	rs4687554
10.1038/s41588-022-01066-3	CL_0000895	Cell-type-specific eQTL	-0.13201	Harvested After 5 D Stimulation	CD4+ Naive T	GNL3	1	chr3:52829589-52829590	7.08551e-04	0.03721	Soskic2022NG	Soskic-2022-Nat. Genet	rs3774364
10.1038/s41588-022-01066-3	CL_0000895	Cell-type-specific eQTL	-0.12671	Harvested After 5 D Stimulation	CD4+ Naive T	GNL3	1	chr3:52828737-52828738	7.96515e-04	0.03609	Soskic2022NG	Soskic-2022-Nat. Genet	rs2245647
10.1038/s41588-022-01066-3	CL_0000895	Cell-type-specific eQTL	-0.15595	Harvested After 5 D Stimulation	CD4+ Naive T	GNL3	1	chr3:52828184-52828185	3.28287e-04	0.04121	Soskic2022NG	Soskic-2022-Nat. Genet	rs2072391
10.1038/s41588-022-01066-3	CL_0000895	Cell-type-specific eQTL	-0.15595	Harvested After 5 D Stimulation	CD4+ Naive T	GNL3	1	chr3:52827987-52827988	3.28287e-04	0.04121	Soskic2022NG	Soskic-2022-Nat. Genet	rs12488303
10.1038/s41588-022-01066-3	CL_0000895	Cell-type-specific eQTL	-0.15595	Harvested After 5 D Stimulation	CD4+ Naive T	GNL3	1	chr3:52827195-52827196	3.28287e-04	0.04121	Soskic2022NG	Soskic-2022-Nat. Genet	rs13072536
10.1038/s41588-022-01066-3	CL_0000895	Cell-type-specific eQTL	-0.15595	Harvested After 5 D Stimulation	CD4+ Naive T	GNL3	1	chr3:52826920-52826921	3.28287e-04	0.04121	Soskic2022NG	Soskic-2022-Nat. Genet	rs2276817
10.1038/s41588-022-01066-3	CL_0000895	Cell-type-specific eQTL	-0.15595	Harvested After 5 D Stimulation	CD4+ Naive T	GNL3	1	chr3:52826350-52826351	3.28287e-04	0.04121	Soskic2022NG	Soskic-2022-Nat. Genet	rs4687658
10.1038/s41588-022-01066-3	CL_0000895	Cell-type-specific eQTL	-0.12671	Harvested After 5 D Stimulation	CD4+ Naive T	GNL3	1	chr3:52825614-52825615	7.96515e-04	0.03609	Soskic2022NG	Soskic-2022-Nat. Genet	rs2535633
10.1038/s41588-022-01066-3	CL_0000895	Cell-type-specific eQTL	-0.12671	Harvested After 5 D Stimulation	CD4+ Naive T	GNL3	1	chr3:52825510-52825511	7.96515e-04	0.03609	Soskic2022NG	Soskic-2022-Nat. Genet	rs2240915
10.1038/s41588-022-01066-3	CL_0000895	Cell-type-specific eQTL	-0.12654	Harvested After 5 D Stimulation	CD4+ Naive T	GNL3	1	chr3:52821849-52821850	6.48508e-04	0.03539	Soskic2022NG	Soskic-2022-Nat. Genet	rs2256332
10.1038/s41588-022-01066-3	CL_0000895	Cell-type-specific eQTL	-0.15826	Harvested After 5 D Stimulation	CD4+ Naive T	GNL3	1	chr3:52821213-52821214	2.90816e-04	0.04142	Soskic2022NG	Soskic-2022-Nat. Genet	rs2239547
10.1038/s41588-022-01066-3	CL_0000895	Cell-type-specific eQTL	-0.12671	Harvested After 5 D Stimulation	CD4+ Naive T	GNL3	1	chr3:52820170-52820171	7.96515e-04	0.03609	Soskic2022NG	Soskic-2022-Nat. Genet	rs2239548
10.1038/s41588-022-01066-3	CL_0000895	Cell-type-specific eQTL	-0.15826	Harvested After 5 D Stimulation	CD4+ Naive T	GNL3	1	chr3:52819731-52819732	2.90816e-04	0.04142	Soskic2022NG	Soskic-2022-Nat. Genet	rs2276815
10.1038/s41588-022-01066-3	CL_0000895	Cell-type-specific eQTL	-0.15826	Harvested After 5 D Stimulation	CD4+ Naive T	GNL3	1	chr3:52818881-52818882	2.90816e-04	0.04142	Soskic2022NG	Soskic-2022-Nat. Genet	rs35004449
10.1038/s41588-022-01066-3	CL_0000895	Cell-type-specific eQTL	-0.15826	Harvested After 5 D Stimulation	CD4+ Naive T	GNL3	1	chr3:52818522-52818523	2.90816e-04	0.04142	Soskic2022NG	Soskic-2022-Nat. Genet	rs4687657
10.1038/s41588-022-01066-3	CL_0000895	Cell-type-specific eQTL	-0.12671	Harvested After 5 D Stimulation	CD4+ Naive T	GNL3	1	chr3:52818044-52818045	7.96515e-04	0.03609	Soskic2022NG	Soskic-2022-Nat. Genet	rs2245538
10.1038/s41588-022-01066-3	CL_0000895	Cell-type-specific eQTL	-0.12671	Harvested After 5 D Stimulation	CD4+ Naive T	GNL3	1	chr3:52817121-52817122	7.96515e-04	0.03609	Soskic2022NG	Soskic-2022-Nat. Genet	rs2240917
10.1038/s41588-022-01066-3	CL_0000895	Cell-type-specific eQTL	-0.12671	Harvested After 5 D Stimulation	CD4+ Naive T	GNL3	1	chr3:52815533-52815534	7.96514e-04	0.03609	Soskic2022NG	Soskic-2022-Nat. Genet	rs7617468
10.1038/s41588-022-01066-3	CL_0000895	Cell-type-specific eQTL	-0.12497	Harvested After 5 D Stimulation	CD4+ Naive T	GNL3	1	chr3:52813585-52813586	8.94839e-04	0.03596	Soskic2022NG	Soskic-2022-Nat. Genet	rs2071044
10.1038/s41588-022-01066-3	CL_0000895	Cell-type-specific eQTL	-0.12308	Harvested After 5 D Stimulation	CD4+ Naive T	GNL3	1	chr3:52811089-52811090	1.28002e-03	0.03663	Soskic2022NG	Soskic-2022-Nat. Genet	rs2535627
10.1038/s41588-022-01066-3	CL_0000895	Cell-type-specific eQTL	-0.14721	Harvested After 5 D Stimulation	CD4+ Naive T	GNL3	1	chr3:52804386-52804387	1.67632e-04	0.03695	Soskic2022NG	Soskic-2022-Nat. Genet	rs4687552
10.1038/s41588-022-01066-3	CL_0000895	Cell-type-specific eQTL	-0.14721	Harvested After 5 D Stimulation	CD4+ Naive T	GNL3	1	chr3:52803839-52803840	1.67632e-04	0.03695	Soskic2022NG	Soskic-2022-Nat. Genet	rs2710331
10.1038/s41588-022-01066-3	CL_0000895	Cell-type-specific eQTL	-0.12308	Harvested After 5 D Stimulation	CD4+ Naive T	GNL3	1	chr3:52803777-52803778	1.28002e-03	0.03663	Soskic2022NG	Soskic-2022-Nat. Genet	rs4481150
10.1038/s41588-022-01066-3	CL_0000895	Cell-type-specific eQTL	-0.14306	Harvested After 5 D Stimulation	CD4+ Naive T	GNL3	1	chr3:52801338-52801339	1.13575e-04	0.03492	Soskic2022NG	Soskic-2022-Nat. Genet	rs736408
10.1038/s41588-022-01066-3	CL_0000895	Cell-type-specific eQTL	-0.14497	Harvested After 5 D Stimulation	CD4+ Naive T	GNL3	1	chr3:52799203-52799204	1.38534e-04	0.03588	Soskic2022NG	Soskic-2022-Nat. Genet	rs2535629
10.1038/s41588-022-01066-3	CL_0000895	Cell-type-specific eQTL	-0.16678	Harvested After 5 D Stimulation	CD4+ Naive T	GNL3	1	chr3:52797685-52797686	1.53865e-05	0.03581	Soskic2022NG	Soskic-2022-Nat. Genet	rs2240919
10.1038/s41588-022-01066-3	CL_0000895	Cell-type-specific eQTL	-0.14526	Harvested After 5 D Stimulation	CD4+ Naive T	GNL3	1	chr3:52796993-52796994	1.32501e-04	0.03584	Soskic2022NG	Soskic-2022-Nat. Genet	rs2240920
10.1038/s41588-022-01066-3	CL_0000895	Cell-type-specific eQTL	-0.16513	Harvested After 5 D Stimulation	CD4+ Naive T	GNL3	1	chr3:52794612-52794613	1.91031e-05	0.03591	Soskic2022NG	Soskic-2022-Nat. Genet	rs9881468
10.1038/s41588-022-01066-3	CL_0000895	Cell-type-specific eQTL	-0.15819	Harvested After 5 D Stimulation	CD4+ Naive T	GNL3	1	chr3:52793899-52793900	3.72040e-05	0.03584	Soskic2022NG	Soskic-2022-Nat. Genet	rs2239699
10.1038/s41588-022-01066-3	CL_0000895	Cell-type-specific eQTL	-0.15819	Harvested After 5 D Stimulation	CD4+ Naive T	GNL3	1	chr3:52793550-52793551	3.72040e-05	0.03584	Soskic2022NG	Soskic-2022-Nat. Genet	rs4687654
10.1038/s41588-022-01066-3	CL_0000895	Cell-type-specific eQTL	-0.16999	Harvested After 5 D Stimulation	CD4+ Naive T	GNL3	0	chr3:52793297-52793298	1.10253e-05	0.03581	Soskic2022NG	Soskic-2022-Nat. Genet	rs1306910580
10.1038/s41588-022-01066-3	CL_0000895	Cell-type-specific eQTL	-0.16513	Harvested After 5 D Stimulation	CD4+ Naive T	GNL3	1	chr3:52792830-52792831	1.91031e-05	0.03591	Soskic2022NG	Soskic-2022-Nat. Genet	rs2071508
10.1038/s41588-022-01066-3	CL_0000895	Cell-type-specific eQTL	-0.16513	Harvested After 5 D Stimulation	CD4+ Naive T	GNL3	1	chr3:52792691-52792692	1.91031e-05	0.03591	Soskic2022NG	Soskic-2022-Nat. Genet	rs2071507
10.1038/s41588-022-01066-3	CL_0000895	Cell-type-specific eQTL	-0.16513	Harvested After 5 D Stimulation	CD4+ Naive T	GNL3	1	chr3:52792604-52792605	1.91031e-05	0.03591	Soskic2022NG	Soskic-2022-Nat. Genet	rs746694
10.1038/s41588-022-01066-3	CL_0000895	Cell-type-specific eQTL	-0.16513	Harvested After 5 D Stimulation	CD4+ Naive T	GNL3	1	chr3:52792260-52792261	1.91031e-05	0.03591	Soskic2022NG	Soskic-2022-Nat. Genet	rs2071506
10.1038/s41588-022-01066-3	CL_0000895	Cell-type-specific eQTL	-0.16513	Harvested After 5 D Stimulation	CD4+ Naive T	GNL3	1	chr3:52791569-52791570	1.91031e-05	0.03591	Soskic2022NG	Soskic-2022-Nat. Genet	rs9324
10.1038/s41588-022-01066-3	CL_0000895	Cell-type-specific eQTL	-0.16513	Harvested After 5 D Stimulation	CD4+ Naive T	GNL3	1	chr3:52791512-52791513	1.91031e-05	0.03591	Soskic2022NG	Soskic-2022-Nat. Genet	rs1075653
10.1038/s41588-022-01066-3	CL_0000895	Cell-type-specific eQTL	-0.16513	Harvested After 5 D Stimulation	CD4+ Naive T	GNL3	1	chr3:52791446-52791447	1.91031e-05	0.03591	Soskic2022NG	Soskic-2022-Nat. Genet	rs1076425
10.1038/s41588-022-01066-3	CL_0000895	Cell-type-specific eQTL	-0.16513	Harvested After 5 D Stimulation	CD4+ Naive T	GNL3	1	chr3:52790594-52790595	1.91031e-05	0.03591	Soskic2022NG	Soskic-2022-Nat. Genet	rs6778329
10.1038/s41588-022-01066-3	CL_0000895	Cell-type-specific eQTL	-0.16513	Harvested After 5 D Stimulation	CD4+ Naive T	GNL3	1	chr3:52790268-52790269	1.91031e-05	0.03591	Soskic2022NG	Soskic-2022-Nat. Genet	rs183919360
10.1038/s41588-022-01066-3	CL_0000895	Cell-type-specific eQTL	-0.16513	Harvested After 5 D Stimulation	CD4+ Naive T	GNL3	1	chr3:52790079-52790080	1.91031e-05	0.03591	Soskic2022NG	Soskic-2022-Nat. Genet	rs2270197
10.1038/s41588-022-01066-3	CL_0000895	Cell-type-specific eQTL	-0.16513	Harvested After 5 D Stimulation	CD4+ Naive T	GNL3	1	chr3:52789432-52789433	1.91031e-05	0.03591	Soskic2022NG	Soskic-2022-Nat. Genet	rs4687551
10.1038/s41588-022-01066-3	CL_0000895	Cell-type-specific eQTL	-0.16513	Harvested After 5 D Stimulation	CD4+ Naive T	GNL3	1	chr3:52789414-52789415	1.91031e-05	0.03591	Soskic2022NG	Soskic-2022-Nat. Genet	rs4687550
10.1038/s41588-022-01066-3	CL_0000895	Cell-type-specific eQTL	-0.13282	Harvested After 5 D Stimulation	CD4+ Naive T	GNL3	1	chr3:52789163-52789164	3.31259e-04	0.03512	Soskic2022NG	Soskic-2022-Nat. Genet	rs942357105
10.1038/s41588-022-01066-3	CL_0000895	Cell-type-specific eQTL	-0.16539	Harvested After 5 D Stimulation	CD4+ Naive T	GNL3	1	chr3:52789110-52789111	1.35993e-05	0.03526	Soskic2022NG	Soskic-2022-Nat. Genet	rs2239549
10.1038/s41588-022-01066-3	CL_0000895	Cell-type-specific eQTL	-0.16539	Harvested After 5 D Stimulation	CD4+ Naive T	GNL3	1	chr3:52788905-52788906	1.35993e-05	0.03526	Soskic2022NG	Soskic-2022-Nat. Genet	rs2300149
10.1038/s41588-022-01066-3	CL_0000895	Cell-type-specific eQTL	-0.16539	Harvested After 5 D Stimulation	CD4+ Naive T	GNL3	1	chr3:52788840-52788841	1.35993e-05	0.03526	Soskic2022NG	Soskic-2022-Nat. Genet	rs2284350
10.1038/s41588-022-01066-3	CL_0000895	Cell-type-specific eQTL	-0.17061	Harvested After 5 D Stimulation	CD4+ Naive T	GNL3	1	chr3:52788773-52788774	1.41624e-05	0.03646	Soskic2022NG	Soskic-2022-Nat. Genet	rs2284351
10.1038/s41588-022-01066-3	CL_0000895	Cell-type-specific eQTL	-0.16539	Harvested After 5 D Stimulation	CD4+ Naive T	GNL3	1	chr3:52788493-52788494	1.35993e-05	0.03526	Soskic2022NG	Soskic-2022-Nat. Genet	rs2239550
10.1038/s41588-022-01066-3	CL_0000895	Cell-type-specific eQTL	-0.15826	Harvested After 5 D Stimulation	CD4+ Naive T	GNL3	1	chr3:52787976-52787977	2.73391e-05	0.03517	Soskic2022NG	Soskic-2022-Nat. Genet	rs778783678
10.1038/s41588-022-01066-3	CL_0000895	Cell-type-specific eQTL	-0.15826	Harvested After 5 D Stimulation	CD4+ Naive T	GNL3	1	chr3:52787161-52787162	2.73391e-05	0.03517	Soskic2022NG	Soskic-2022-Nat. Genet	rs2286798
10.1038/s41588-022-01066-3	CL_0000895	Cell-type-specific eQTL	-0.15333	Harvested After 5 D Stimulation	CD4+ Naive T	GNL3	1	chr3:52786995-52786996	3.11600e-05	0.03435	Soskic2022NG	Soskic-2022-Nat. Genet	rs1042779
10.1038/s41588-022-01066-3	CL_0000895	Cell-type-specific eQTL	-0.15826	Harvested After 5 D Stimulation	CD4+ Naive T	GNL3	1	chr3:52786965-52786966	2.73391e-05	0.03517	Soskic2022NG	Soskic-2022-Nat. Genet	rs678
10.1038/s41588-022-01066-3	CL_0000895	Cell-type-specific eQTL	-0.16539	Harvested After 5 D Stimulation	CD4+ Naive T	GNL3	1	chr3:52785311-52785312	1.35993e-05	0.03526	Soskic2022NG	Soskic-2022-Nat. Genet	rs2268023
10.1038/s41588-022-01066-3	CL_0000895	Cell-type-specific eQTL	-0.16539	Harvested After 5 D Stimulation	CD4+ Naive T	GNL3	1	chr3:52784563-52784564	1.35993e-05	0.03526	Soskic2022NG	Soskic-2022-Nat. Genet	rs2239551
10.1038/s41588-022-01066-3	CL_0000895	Cell-type-specific eQTL	-0.15826	Harvested After 5 D Stimulation	CD4+ Naive T	GNL3	1	chr3:52783762-52783763	2.73391e-05	0.03517	Soskic2022NG	Soskic-2022-Nat. Genet	rs3774355
10.1038/s41588-022-01066-3	CL_0000895	Cell-type-specific eQTL	-0.15826	Harvested After 5 D Stimulation	CD4+ Naive T	GNL3	1	chr3:52783659-52783660	2.73391e-05	0.03517	Soskic2022NG	Soskic-2022-Nat. Genet	rs3774354
10.1038/s41588-022-01066-3	CL_0000895	Cell-type-specific eQTL	-0.15333	Harvested After 5 D Stimulation	CD4+ Naive T	GNL3	1	chr3:52782569-52782570	3.11600e-05	0.03435	Soskic2022NG	Soskic-2022-Nat. Genet	rs183955486
10.1038/s41588-022-01066-3	CL_0000895	Cell-type-specific eQTL	-0.13282	Harvested After 5 D Stimulation	CD4+ Naive T	GNL3	1	chr3:52781889-52781890	3.31259e-04	0.03512	Soskic2022NG	Soskic-2022-Nat. Genet	rs2710323
10.1038/s41588-022-01066-3	CL_0000895	Cell-type-specific eQTL	-0.16539	Harvested After 5 D Stimulation	CD4+ Naive T	GNL3	0	chr3:52781287-52781288	1.35993e-05	0.03526	Soskic2022NG	Soskic-2022-Nat. Genet	rs187425956
10.1038/s41588-022-01066-3	CL_0000895	Cell-type-specific eQTL	-0.13282	Harvested After 5 D Stimulation	CD4+ Naive T	GNL3	0	chr3:52780240-52780241	3.31259e-04	0.03512	Soskic2022NG	Soskic-2022-Nat. Genet	rs2302417
10.1038/s41588-022-01066-3	CL_0000895	Cell-type-specific eQTL	-0.15828	Harvested After 5 D Stimulation	CD4+ Naive T	GNL3	1	chr3:52777156-52777157	1.82652e-05	0.03433	Soskic2022NG	Soskic-2022-Nat. Genet	rs6792369
10.1038/s41588-022-01066-3	CL_0000895	Cell-type-specific eQTL	-0.16522	Harvested After 5 D Stimulation	CD4+ Naive T	GNL3	1	chr3:52776917-52776918	8.98241e-06	0.0344	Soskic2022NG	Soskic-2022-Nat. Genet	rs2098167
10.1038/s41588-022-01066-3	CL_0000895	Cell-type-specific eQTL	-0.16522	Harvested After 5 D Stimulation	CD4+ Naive T	GNL3	1	chr3:52775509-52775510	8.98241e-06	0.0344	Soskic2022NG	Soskic-2022-Nat. Genet	rs2019065
10.1038/s41588-022-01066-3	CL_0000895	Cell-type-specific eQTL	-0.17316	Harvested After 5 D Stimulation	CD4+ Naive T	GNL3	1	chr3:52774325-52774326	5.63348e-06	0.03515	Soskic2022NG	Soskic-2022-Nat. Genet	rs1014969
10.1038/s41588-022-01066-3	CL_0000895	Cell-type-specific eQTL	-0.17006	Harvested After 5 D Stimulation	CD4+ Naive T	GNL3	1	chr3:52773720-52773721	1.29529e-05	0.03615	Soskic2022NG	Soskic-2022-Nat. Genet	rs11717836
10.1038/s41588-022-01066-3	CL_0000895	Cell-type-specific eQTL	-0.17316	Harvested After 5 D Stimulation	CD4+ Naive T	GNL3	1	chr3:52771077-52771078	5.63348e-06	0.03515	Soskic2022NG	Soskic-2022-Nat. Genet	rs998909
10.1038/s41588-022-01066-3	CL_0000895	Cell-type-specific eQTL	-0.17316	Harvested After 5 D Stimulation	CD4+ Naive T	GNL3	1	chr3:52770471-52770472	5.63348e-06	0.03515	Soskic2022NG	Soskic-2022-Nat. Genet	rs13071584
10.1038/s41588-022-01066-3	CL_0000895	Cell-type-specific eQTL	-0.17006	Harvested After 5 D Stimulation	CD4+ Naive T	GNL3	1	chr3:52769189-52769190	1.29529e-05	0.03615	Soskic2022NG	Soskic-2022-Nat. Genet	rs2268024
10.1038/s41588-022-01066-3	CL_0000895	Cell-type-specific eQTL	-0.16408	Harvested After 5 D Stimulation	CD4+ Naive T	GNL3	1	chr3:52768386-52768387	1.56361e-05	0.03527	Soskic2022NG	Soskic-2022-Nat. Genet	rs2230534
10.1038/s41588-022-01066-3	CL_0000895	Cell-type-specific eQTL	-0.16408	Harvested After 5 D Stimulation	CD4+ Naive T	GNL3	0	chr3:52767557-52767558	1.56361e-05	0.03527	Soskic2022NG	Soskic-2022-Nat. Genet	rs1436923017
10.1038/s41588-022-01066-3	CL_0000895	Cell-type-specific eQTL	-0.17006	Harvested After 5 D Stimulation	CD4+ Naive T	GNL3	1	chr3:52766715-52766716	1.29529e-05	0.03615	Soskic2022NG	Soskic-2022-Nat. Genet	rs4687650
10.1038/s41588-022-01066-3	CL_0000895	Cell-type-specific eQTL	-0.16408	Harvested After 5 D Stimulation	CD4+ Naive T	GNL3	1	chr3:52766268-52766269	1.56361e-05	0.03527	Soskic2022NG	Soskic-2022-Nat. Genet	rs2230535
10.1038/s41588-022-01066-3	CL_0000895	Cell-type-specific eQTL	-0.17006	Harvested After 5 D Stimulation	CD4+ Naive T	GNL3	1	chr3:52763618-52763619	1.29529e-05	0.03615	Soskic2022NG	Soskic-2022-Nat. Genet	rs1029871
10.1038/s41588-022-01066-3	CL_0000895	Cell-type-specific eQTL	-0.17006	Harvested After 5 D Stimulation	CD4+ Naive T	GNL3	1	chr3:52761208-52761209	1.29529e-05	0.03615	Soskic2022NG	Soskic-2022-Nat. Genet	rs2268025
10.1038/s41588-022-01066-3	CL_0000895	Cell-type-specific eQTL	-0.17316	Harvested After 5 D Stimulation	CD4+ Naive T	GNL3	1	chr3:52760351-52760352	5.63348e-06	0.03515	Soskic2022NG	Soskic-2022-Nat. Genet	rs4687648
10.1038/s41588-022-01066-3	CL_0000895	Cell-type-specific eQTL	-0.17316	Harvested After 5 D Stimulation	CD4+ Naive T	GNL3	1	chr3:52759586-52759587	5.63348e-06	0.03515	Soskic2022NG	Soskic-2022-Nat. Genet	rs12497998
10.1038/s41588-022-01066-3	CL_0000895	Cell-type-specific eQTL	-0.17316	Harvested After 5 D Stimulation	CD4+ Naive T	GNL3	0	chr3:52759400-52759401	5.63348e-06	0.03515	Soskic2022NG	Soskic-2022-Nat. Genet	rs1439324008
10.1038/s41588-022-01066-3	CL_0000895	Cell-type-specific eQTL	-0.17006	Harvested After 5 D Stimulation	CD4+ Naive T	GNL3	1	chr3:52759223-52759224	1.29529e-05	0.03615	Soskic2022NG	Soskic-2022-Nat. Genet	rs11130327
10.1038/s41588-022-01066-3	CL_0000895	Cell-type-specific eQTL	-0.17006	Harvested After 5 D Stimulation	CD4+ Naive T	GNL3	0	chr3:52759105-52759106	1.29529e-05	0.03615	Soskic2022NG	Soskic-2022-Nat. Genet	rs200405776
10.1038/s41588-022-01066-3	CL_0000895	Cell-type-specific eQTL	-0.16408	Harvested After 5 D Stimulation	CD4+ Naive T	GNL3	1	chr3:52756197-52756198	1.56361e-05	0.03527	Soskic2022NG	Soskic-2022-Nat. Genet	rs13061423
10.1038/s41588-022-01066-3	CL_0000895	Cell-type-specific eQTL	-0.17316	Harvested After 5 D Stimulation	CD4+ Naive T	GNL3	1	chr3:52754943-52754944	5.63348e-06	0.03515	Soskic2022NG	Soskic-2022-Nat. Genet	rs6414570
10.1038/s41588-022-01066-3	CL_0000895	Cell-type-specific eQTL	-0.16408	Harvested After 5 D Stimulation	CD4+ Naive T	GNL3	1	chr3:52753587-52753588	1.56361e-05	0.03527	Soskic2022NG	Soskic-2022-Nat. Genet	rs2336545
10.1038/s41588-022-01066-3	CL_0000895	Cell-type-specific eQTL	-0.17006	Harvested After 5 D Stimulation	CD4+ Naive T	GNL3	1	chr3:52753226-52753227	1.29529e-05	0.03615	Soskic2022NG	Soskic-2022-Nat. Genet	rs13095332
10.1038/s41588-022-01066-3	CL_0000895	Cell-type-specific eQTL	-0.17316	Harvested After 5 D Stimulation	CD4+ Naive T	GNL3	0	chr3:52752897-52752898	5.63348e-06	0.03515	Soskic2022NG	Soskic-2022-Nat. Genet	rs13094778
10.1038/s41588-022-01066-3	CL_0000895	Cell-type-specific eQTL	-0.14721	Harvested After 5 D Stimulation	CD4+ Naive T	GNL3	1	chr3:52751222-52751223	8.87527e-05	0.03532	Soskic2022NG	Soskic-2022-Nat. Genet	rs7646741
10.1038/s41588-022-01066-3	CL_0000895	Cell-type-specific eQTL	-0.17006	Harvested After 5 D Stimulation	CD4+ Naive T	GNL3	1	chr3:52751152-52751153	1.29529e-05	0.03615	Soskic2022NG	Soskic-2022-Nat. Genet	rs13082960
10.1038/s41588-022-01066-3	CL_0000895	Cell-type-specific eQTL	-0.17316	Harvested After 5 D Stimulation	CD4+ Naive T	GNL3	1	chr3:52750400-52750401	5.63348e-06	0.03515	Soskic2022NG	Soskic-2022-Nat. Genet	rs6787154
10.1038/s41588-022-01066-3	CL_0000895	Cell-type-specific eQTL	-0.17006	Harvested After 5 D Stimulation	CD4+ Naive T	GNL3	1	chr3:52748823-52748824	1.29529e-05	0.03615	Soskic2022NG	Soskic-2022-Nat. Genet	rs62255396
10.1038/s41588-022-01066-3	CL_0000895	Cell-type-specific eQTL	-0.17006	Harvested After 5 D Stimulation	CD4+ Naive T	GNL3	1	chr3:52748258-52748259	1.29529e-05	0.03615	Soskic2022NG	Soskic-2022-Nat. Genet	rs13087772
10.1038/s41588-022-01066-3	CL_0000895	Cell-type-specific eQTL	-0.17006	Harvested After 5 D Stimulation	CD4+ Naive T	GNL3	0	chr3:52747942-52747943	1.29529e-05	0.03615	Soskic2022NG	Soskic-2022-Nat. Genet	rs979988496
10.1038/s41588-022-01066-3	CL_0000895	Cell-type-specific eQTL	-0.17006	Harvested After 5 D Stimulation	CD4+ Naive T	GNL3	1	chr3:52747523-52747524	1.29529e-05	0.03615	Soskic2022NG	Soskic-2022-Nat. Genet	rs13082208
10.1038/s41588-022-01066-3	CL_0000895	Cell-type-specific eQTL	-0.17316	Harvested After 5 D Stimulation	CD4+ Naive T	GNL3	1	chr3:52746493-52746494	5.63348e-06	0.03515	Soskic2022NG	Soskic-2022-Nat. Genet	rs2072390
10.1038/s41588-022-01066-3	CL_0000895	Cell-type-specific eQTL	-0.17316	Harvested After 5 D Stimulation	CD4+ Naive T	GNL3	1	chr3:52745785-52745786	5.63348e-06	0.03515	Soskic2022NG	Soskic-2022-Nat. Genet	rs13074853
10.1038/s41588-022-01066-3	CL_0000895	Cell-type-specific eQTL	-0.17316	Harvested After 5 D Stimulation	CD4+ Naive T	GNL3	1	chr3:52745575-52745576	5.63348e-06	0.03515	Soskic2022NG	Soskic-2022-Nat. Genet	rs112860674
10.1038/s41588-022-01066-3	CL_0000895	Cell-type-specific eQTL	-0.17006	Harvested After 5 D Stimulation	CD4+ Naive T	GNL3	1	chr3:52744331-52744332	1.29529e-05	0.03615	Soskic2022NG	Soskic-2022-Nat. Genet	rs2268026
10.1038/s41588-022-01066-3	CL_0000895	Cell-type-specific eQTL	-0.17006	Harvested After 5 D Stimulation	CD4+ Naive T	GNL3	1	chr3:52744035-52744036	1.29529e-05	0.03615	Soskic2022NG	Soskic-2022-Nat. Genet	rs2286800
10.1038/s41588-022-01066-3	CL_0000895	Cell-type-specific eQTL	-0.17316	Harvested After 5 D Stimulation	CD4+ Naive T	GNL3	1	chr3:52742892-52742893	5.63348e-06	0.03515	Soskic2022NG	Soskic-2022-Nat. Genet	rs7638162
10.1038/s41588-022-01066-3	CL_0000895	Cell-type-specific eQTL	-0.17006	Harvested After 5 D Stimulation	CD4+ Naive T	GNL3	0	chr3:52740819-52740820	1.29529e-05	0.03615	Soskic2022NG	Soskic-2022-Nat. Genet	rs1347893804
10.1038/s41588-022-01066-3	CL_0000895	Cell-type-specific eQTL	-0.17316	Harvested After 5 D Stimulation	CD4+ Naive T	GNL3	1	chr3:52740514-52740515	5.63348e-06	0.03515	Soskic2022NG	Soskic-2022-Nat. Genet	rs2159644
10.1038/s41588-022-01066-3	CL_0000895	Cell-type-specific eQTL	-0.17316	Harvested After 5 D Stimulation	CD4+ Naive T	GNL3	1	chr3:52737452-52737453	5.63348e-06	0.03515	Soskic2022NG	Soskic-2022-Nat. Genet	rs6445535
10.1038/s41588-022-01066-3	CL_0000895	Cell-type-specific eQTL	-0.17006	Harvested After 5 D Stimulation	CD4+ Naive T	GNL3	1	chr3:52736968-52736969	1.29529e-05	0.03615	Soskic2022NG	Soskic-2022-Nat. Genet	rs11130325
10.1038/s41588-022-01066-3	CL_0000895	Cell-type-specific eQTL	-0.14721	Harvested After 5 D Stimulation	CD4+ Naive T	GNL3	1	chr3:52736294-52736295	8.87527e-05	0.03532	Soskic2022NG	Soskic-2022-Nat. Genet	rs11130324
10.1038/s41588-022-01066-3	CL_0000895	Cell-type-specific eQTL	-0.17006	Harvested After 5 D Stimulation	CD4+ Naive T	GNL3	1	chr3:52736261-52736262	1.29529e-05	0.03615	Soskic2022NG	Soskic-2022-Nat. Genet	rs11130323
10.1038/s41588-022-01066-3	CL_0000895	Cell-type-specific eQTL	-0.17316	Harvested After 5 D Stimulation	CD4+ Naive T	GNL3	1	chr3:52733411-52733412	5.63348e-06	0.03515	Soskic2022NG	Soskic-2022-Nat. Genet	rs767418
10.1038/s41588-022-01066-3	CL_0000895	Cell-type-specific eQTL	-0.17006	Harvested After 5 D Stimulation	CD4+ Naive T	GNL3	1	chr3:52732590-52732591	1.29529e-05	0.03615	Soskic2022NG	Soskic-2022-Nat. Genet	rs2268027
10.1038/s41588-022-01066-3	CL_0000895	Cell-type-specific eQTL	-0.17316	Harvested After 5 D Stimulation	CD4+ Naive T	GNL3	1	chr3:52732106-52732107	5.63348e-06	0.03515	Soskic2022NG	Soskic-2022-Nat. Genet	rs34739010
10.1038/s41588-022-01066-3	CL_0000895	Cell-type-specific eQTL	-0.17316	Harvested After 5 D Stimulation	CD4+ Naive T	GNL3	1	chr3:52731866-52731867	5.63348e-06	0.03515	Soskic2022NG	Soskic-2022-Nat. Genet	rs11714030
10.1038/s41588-022-01066-3	CL_0000895	Cell-type-specific eQTL	-0.17316	Harvested After 5 D Stimulation	CD4+ Naive T	GNL3	1	chr3:52731630-52731631	5.63348e-06	0.03515	Soskic2022NG	Soskic-2022-Nat. Genet	rs2079929
10.1038/s41588-022-01066-3	CL_0000895	Cell-type-specific eQTL	-0.17006	Harvested After 5 D Stimulation	CD4+ Naive T	GNL3	1	chr3:52730608-52730609	1.29529e-05	0.03615	Soskic2022NG	Soskic-2022-Nat. Genet	rs10780035
10.1038/s41588-022-01066-3	CL_0000895	Cell-type-specific eQTL	-0.17006	Harvested After 5 D Stimulation	CD4+ Naive T	GNL3	1	chr3:52729938-52729939	1.29529e-05	0.03615	Soskic2022NG	Soskic-2022-Nat. Genet	rs4687549
10.1038/s41588-022-01066-3	CL_0000895	Cell-type-specific eQTL	-0.17006	Harvested After 5 D Stimulation	CD4+ Naive T	GNL3	1	chr3:52729147-52729148	1.29529e-05	0.03615	Soskic2022NG	Soskic-2022-Nat. Genet	rs34291015
10.1038/s41588-022-01066-3	CL_0000895	Cell-type-specific eQTL	-0.17316	Harvested After 5 D Stimulation	CD4+ Naive T	GNL3	1	chr3:52728984-52728985	5.63348e-06	0.03515	Soskic2022NG	Soskic-2022-Nat. Genet	rs7653028
10.1038/s41588-022-01066-3	CL_0000895	Cell-type-specific eQTL	-0.17006	Harvested After 5 D Stimulation	CD4+ Naive T	GNL3	1	chr3:52728976-52728977	1.29529e-05	0.03615	Soskic2022NG	Soskic-2022-Nat. Genet	rs13086623
10.1038/s41588-022-01066-3	CL_0000895	Cell-type-specific eQTL	-0.17912	Harvested After 5 D Stimulation	CD4+ Naive T	GNL3	1	chr3:52728682-52728683	4.64311e-06	0.03598	Soskic2022NG	Soskic-2022-Nat. Genet	rs11130321
10.1038/s41588-022-01066-3	CL_0000895	Cell-type-specific eQTL	-0.17006	Harvested After 5 D Stimulation	CD4+ Naive T	GNL3	1	chr3:52725153-52725154	1.29529e-05	0.03615	Soskic2022NG	Soskic-2022-Nat. Genet	rs34610878
10.1038/s41588-022-01066-3	CL_0000895	Cell-type-specific eQTL	-0.17006	Harvested After 5 D Stimulation	CD4+ Naive T	GNL3	1	chr3:52724926-52724927	1.29529e-05	0.03615	Soskic2022NG	Soskic-2022-Nat. Genet	rs11714088
10.1038/s41588-022-01066-3	CL_0000895	Cell-type-specific eQTL	-0.17316	Harvested After 5 D Stimulation	CD4+ Naive T	GNL3	1	chr3:52724555-52724556	5.63348e-06	0.03515	Soskic2022NG	Soskic-2022-Nat. Genet	rs56098033
10.1038/s41588-022-01066-3	CL_0000895	Cell-type-specific eQTL	-0.17316	Harvested After 5 D Stimulation	CD4+ Naive T	GNL3	0	chr3:52724554-52724555	5.63348e-06	0.03515	Soskic2022NG	Soskic-2022-Nat. Genet	rs57039206
10.1038/s41588-022-01066-3	CL_0000895	Cell-type-specific eQTL	-0.17006	Harvested After 5 D Stimulation	CD4+ Naive T	GNL3	0	chr3:52721576-52721577	1.29529e-05	0.03615	Soskic2022NG	Soskic-2022-Nat. Genet	rs11130319
10.1038/s41588-022-01066-3	CL_0000895	Cell-type-specific eQTL	-0.17316	Harvested After 5 D Stimulation	CD4+ Naive T	GNL3	1	chr3:52719516-52719517	5.63348e-06	0.03515	Soskic2022NG	Soskic-2022-Nat. Genet	rs34918356
10.1038/s41588-022-01066-3	CL_0000895	Cell-type-specific eQTL	-0.14721	Harvested After 5 D Stimulation	CD4+ Naive T	GNL3	1	chr3:52718943-52718944	8.87527e-05	0.03532	Soskic2022NG	Soskic-2022-Nat. Genet	rs35212380
10.1038/s41588-022-01066-3	CL_0000895	Cell-type-specific eQTL	-0.16408	Harvested After 5 D Stimulation	CD4+ Naive T	GNL3	0	chr3:52718472-52718473	1.56361e-05	0.03527	Soskic2022NG	Soskic-2022-Nat. Genet	rs1449915029
10.1038/s41588-022-01066-3	CL_0000895	Cell-type-specific eQTL	-0.17316	Harvested After 5 D Stimulation	CD4+ Naive T	GNL3	1	chr3:52718059-52718060	5.63348e-06	0.03515	Soskic2022NG	Soskic-2022-Nat. Genet	rs2109634
10.1038/s41588-022-01066-3	CL_0000895	Cell-type-specific eQTL	-0.17316	Harvested After 5 D Stimulation	CD4+ Naive T	GNL3	1	chr3:52717518-52717519	5.63348e-06	0.03515	Soskic2022NG	Soskic-2022-Nat. Genet	rs7624716
10.1038/s41588-022-01066-3	CL_0000895	Cell-type-specific eQTL	-0.17316	Harvested After 5 D Stimulation	CD4+ Naive T	GNL3	1	chr3:52715318-52715319	5.63348e-06	0.03515	Soskic2022NG	Soskic-2022-Nat. Genet	rs35526119
10.1038/s41588-022-01066-3	CL_0000895	Cell-type-specific eQTL	-0.17316	Harvested After 5 D Stimulation	CD4+ Naive T	GNL3	1	chr3:52714841-52714842	5.63348e-06	0.03515	Soskic2022NG	Soskic-2022-Nat. Genet	rs11716747
10.1038/s41588-022-01066-3	CL_0000895	Cell-type-specific eQTL	-0.17006	Harvested After 5 D Stimulation	CD4+ Naive T	GNL3	1	chr3:52714255-52714256	1.29529e-05	0.03615	Soskic2022NG	Soskic-2022-Nat. Genet	rs2878726
10.1038/s41588-022-01066-3	CL_0000895	Cell-type-specific eQTL	-0.17912	Harvested After 5 D Stimulation	CD4+ Naive T	GNL3	1	chr3:52714042-52714043	4.64311e-06	0.03598	Soskic2022NG	Soskic-2022-Nat. Genet	rs1468638
10.1038/s41588-022-01066-3	CL_0000895	Cell-type-specific eQTL	-0.17006	Harvested After 5 D Stimulation	CD4+ Naive T	GNL3	1	chr3:52713726-52713727	1.29529e-05	0.03615	Soskic2022NG	Soskic-2022-Nat. Genet	rs7620039
10.1038/s41588-022-01066-3	CL_0000895	Cell-type-specific eQTL	-0.17006	Harvested After 5 D Stimulation	CD4+ Naive T	GNL3	1	chr3:52713305-52713306	1.29529e-05	0.03615	Soskic2022NG	Soskic-2022-Nat. Genet	rs62255371
10.1038/s41588-022-01066-3	CL_0000895	Cell-type-specific eQTL	-0.17912	Harvested After 5 D Stimulation	CD4+ Naive T	GNL3	1	chr3:52712525-52712526	4.64311e-06	0.03598	Soskic2022NG	Soskic-2022-Nat. Genet	rs4687644
10.1038/s41588-022-01066-3	CL_0000895	Cell-type-specific eQTL	0.1568	Harvested After 5 D Stimulation	CD4+ Naive T	GNL3	1	chr3:52711071-52711072	3.06657e-05	0.0351	Soskic2022NG	Soskic-2022-Nat. Genet	rs11235
10.1038/s41588-022-01066-3	CL_0000895	Cell-type-specific eQTL	-0.17912	Harvested After 5 D Stimulation	CD4+ Naive T	GNL3	1	chr3:52710444-52710445	4.64311e-06	0.03598	Soskic2022NG	Soskic-2022-Nat. Genet	rs13079063
10.1038/s41588-022-01066-3	CL_0000895	Cell-type-specific eQTL	-0.17006	Harvested After 5 D Stimulation	CD4+ Naive T	GNL3	0	chr3:52710208-52710209	1.29529e-05	0.03615	Soskic2022NG	Soskic-2022-Nat. Genet	rs1458973173
10.1038/s41588-022-01066-3	CL_0000895	Cell-type-specific eQTL	-0.17912	Harvested After 5 D Stimulation	CD4+ Naive T	GNL3	1	chr3:52709368-52709369	4.64311e-06	0.03598	Soskic2022NG	Soskic-2022-Nat. Genet	rs6445534
10.1038/s41588-022-01066-3	CL_0000895	Cell-type-specific eQTL	-0.17912	Harvested After 5 D Stimulation	CD4+ Naive T	GNL3	1	chr3:52708521-52708522	4.64311e-06	0.03598	Soskic2022NG	Soskic-2022-Nat. Genet	rs12486554
10.1038/s41588-022-01066-3	CL_0000895	Cell-type-specific eQTL	-0.17006	Harvested After 5 D Stimulation	CD4+ Naive T	GNL3	1	chr3:52708397-52708398	1.29529e-05	0.03615	Soskic2022NG	Soskic-2022-Nat. Genet	rs34017441
10.1038/s41588-022-01066-3	CL_0000895	Cell-type-specific eQTL	-0.17912	Harvested After 5 D Stimulation	CD4+ Naive T	GNL3	0	chr3:52707565-52707566	4.64311e-06	0.03598	Soskic2022NG	Soskic-2022-Nat. Genet	rs76516400
10.1038/s41588-022-01066-3	CL_0000895	Cell-type-specific eQTL	-0.17912	Harvested After 5 D Stimulation	CD4+ Naive T	GNL3	1	chr3:52707144-52707145	4.64311e-06	0.03598	Soskic2022NG	Soskic-2022-Nat. Genet	rs3755798
10.1038/s41588-022-01066-3	CL_0000895	Cell-type-specific eQTL	-0.17912	Harvested After 5 D Stimulation	CD4+ Naive T	GNL3	1	chr3:52706166-52706167	4.64311e-06	0.03598	Soskic2022NG	Soskic-2022-Nat. Genet	rs6617
10.1038/s41588-022-01066-3	CL_0000895	Cell-type-specific eQTL	-0.17006	Harvested After 5 D Stimulation	CD4+ Naive T	GNL3	1	chr3:52705504-52705505	1.29529e-05	0.03615	Soskic2022NG	Soskic-2022-Nat. Genet	rs8906
10.1038/s41588-022-01066-3	CL_0000895	Cell-type-specific eQTL	-0.17912	Harvested After 5 D Stimulation	CD4+ Naive T	GNL3	1	chr3:52704149-52704150	4.64311e-06	0.03598	Soskic2022NG	Soskic-2022-Nat. Genet	rs12635140
10.1038/s41588-022-01066-3	CL_0000895	Cell-type-specific eQTL	-0.17006	Harvested After 5 D Stimulation	CD4+ Naive T	GNL3	1	chr3:52700938-52700939	1.29529e-05	0.03615	Soskic2022NG	Soskic-2022-Nat. Genet	rs11130318
10.1038/s41588-022-01066-3	CL_0000895	Cell-type-specific eQTL	-0.17912	Harvested After 5 D Stimulation	CD4+ Naive T	GNL3	1	chr3:52699062-52699063	4.64311e-06	0.03598	Soskic2022NG	Soskic-2022-Nat. Genet	rs185291383
10.1038/s41588-022-01066-3	CL_0000895	Cell-type-specific eQTL	-0.15084	Harvested After 5 D Stimulation	CD4+ Naive T	GNL3	1	chr3:52698413-52698414	8.56584e-05	0.0361	Soskic2022NG	Soskic-2022-Nat. Genet	rs13081155
10.1038/s41588-022-01066-3	CL_0000895	Cell-type-specific eQTL	-0.17912	Harvested After 5 D Stimulation	CD4+ Naive T	GNL3	1	chr3:52697582-52697583	4.64311e-06	0.03598	Soskic2022NG	Soskic-2022-Nat. Genet	rs3733041
10.1038/s41588-022-01066-3	CL_0000895	Cell-type-specific eQTL	-0.17006	Harvested After 5 D Stimulation	CD4+ Naive T	GNL3	1	chr3:52697467-52697468	1.29529e-05	0.03615	Soskic2022NG	Soskic-2022-Nat. Genet	rs11130317
10.1038/s41588-022-01066-3	CL_0000895	Cell-type-specific eQTL	-0.17912	Harvested After 5 D Stimulation	CD4+ Naive T	GNL3	1	chr3:52697253-52697254	4.64311e-06	0.03598	Soskic2022NG	Soskic-2022-Nat. Genet	rs2164885
10.1038/s41588-022-01066-3	CL_0000895	Cell-type-specific eQTL	-0.17006	Harvested After 5 D Stimulation	CD4+ Naive T	GNL3	1	chr3:52694788-52694789	1.29529e-05	0.03615	Soskic2022NG	Soskic-2022-Nat. Genet	rs6976
10.1038/s41588-022-01066-3	CL_0000895	Cell-type-specific eQTL	-0.17912	Harvested After 5 D Stimulation	CD4+ Naive T	GNL3	0	chr3:52694296-52694297	4.64311e-06	0.03598	Soskic2022NG	Soskic-2022-Nat. Genet	rs79193411
10.1038/s41588-022-01066-3	CL_0000895	Cell-type-specific eQTL	-0.17912	Harvested After 5 D Stimulation	CD4+ Naive T	GNL3	1	chr3:52693241-52693242	4.64311e-06	0.03598	Soskic2022NG	Soskic-2022-Nat. Genet	rs2289247
10.1038/s41588-022-01066-3	CL_0000895	Cell-type-specific eQTL	-0.17006	Harvested After 5 D Stimulation	CD4+ Naive T	GNL3	1	chr3:52692679-52692680	1.29529e-05	0.03615	Soskic2022NG	Soskic-2022-Nat. Genet	rs6762813
10.1038/s41588-022-01066-3	CL_0000895	Cell-type-specific eQTL	-0.17006	Harvested After 5 D Stimulation	CD4+ Naive T	GNL3	1	chr3:52691945-52691946	1.29529e-05	0.03615	Soskic2022NG	Soskic-2022-Nat. Genet	rs13076193
10.1038/s41588-022-01066-3	CL_0000895	Cell-type-specific eQTL	-0.17912	Harvested After 5 D Stimulation	CD4+ Naive T	GNL3	1	chr3:52691755-52691756	4.64311e-06	0.03598	Soskic2022NG	Soskic-2022-Nat. Genet	rs35315313
10.1038/s41588-022-01066-3	CL_0000895	Cell-type-specific eQTL	-0.15084	Harvested After 5 D Stimulation	CD4+ Naive T	GNL3	0	chr3:52691702-52691703	8.56584e-05	0.0361	Soskic2022NG	Soskic-2022-Nat. Genet	rs1412350190
10.1038/s41588-022-01066-3	CL_0000895	Cell-type-specific eQTL	-0.15084	Harvested After 5 D Stimulation	CD4+ Naive T	GNL3	1	chr3:52688319-52688320	8.56584e-05	0.0361	Soskic2022NG	Soskic-2022-Nat. Genet	rs3774349
10.1038/s41588-022-01066-3	CL_0000895	Cell-type-specific eQTL	-0.17006	Harvested After 5 D Stimulation	CD4+ Naive T	GNL3	1	chr3:52687289-52687290	1.29529e-05	0.03615	Soskic2022NG	Soskic-2022-Nat. Genet	rs11177
10.1038/s41588-022-01066-3	CL_0000895	Cell-type-specific eQTL	-0.15084	Harvested After 5 D Stimulation	CD4+ Naive T	GNL3	1	chr3:52686064-52686065	8.56584e-05	0.0361	Soskic2022NG	Soskic-2022-Nat. Genet	rs1108842
10.1038/s41588-022-01066-3	CL_0000895	Cell-type-specific eQTL	0.16063	Harvested After 5 D Stimulation	CD4+ Naive T	GNL3	1	chr3:52685800-52685801	2.92306e-05	0.03585	Soskic2022NG	Soskic-2022-Nat. Genet	rs10933
10.1038/s41588-022-01066-3	CL_0000895	Cell-type-specific eQTL	-0.17912	Harvested After 5 D Stimulation	CD4+ Naive T	GNL3	1	chr3:52685382-52685383	4.64311e-06	0.03598	Soskic2022NG	Soskic-2022-Nat. Genet	rs1866268
10.1038/s41588-022-01066-3	CL_0000895	Cell-type-specific eQTL	-0.17912	Harvested After 5 D Stimulation	CD4+ Naive T	GNL3	1	chr3:52685072-52685073	4.64311e-06	0.03598	Soskic2022NG	Soskic-2022-Nat. Genet	rs3733039
10.1038/s41588-022-01066-3	CL_0000895	Cell-type-specific eQTL	-0.17912	Harvested After 5 D Stimulation	CD4+ Naive T	GNL3	1	chr3:52684264-52684265	4.64311e-06	0.03598	Soskic2022NG	Soskic-2022-Nat. Genet	rs10865974
10.1038/s41588-022-01066-3	CL_0000895	Cell-type-specific eQTL	-0.17006	Harvested After 5 D Stimulation	CD4+ Naive T	GNL3	1	chr3:52684138-52684139	1.29529e-05	0.03615	Soskic2022NG	Soskic-2022-Nat. Genet	rs10865973
10.1038/s41588-022-01066-3	CL_0000895	Cell-type-specific eQTL	-0.17912	Harvested After 5 D Stimulation	CD4+ Naive T	GNL3	1	chr3:52683266-52683267	4.64311e-06	0.03598	Soskic2022NG	Soskic-2022-Nat. Genet	rs6445531
10.1038/s41588-022-01066-3	CL_0000895	Cell-type-specific eQTL	-0.17006	Harvested After 5 D Stimulation	CD4+ Naive T	GNL3	0	chr3:52683213-52683214	1.29529e-05	0.03615	Soskic2022NG	Soskic-2022-Nat. Genet	rs55678971
10.1038/s41588-022-01066-3	CL_0000895	Cell-type-specific eQTL	-0.17006	Harvested After 5 D Stimulation	CD4+ Naive T	GNL3	0	chr3:52683210-52683211	1.29529e-05	0.03615	Soskic2022NG	Soskic-2022-Nat. Genet	rs28538043
10.1038/s41588-022-01066-3	CL_0000895	Cell-type-specific eQTL	-0.17912	Harvested After 5 D Stimulation	CD4+ Naive T	GNL3	1	chr3:52682921-52682922	4.64311e-06	0.03598	Soskic2022NG	Soskic-2022-Nat. Genet	rs34157897
10.1038/s41588-022-01066-3	CL_0000895	Cell-type-specific eQTL	-0.17641	Harvested After 5 D Stimulation	CD4+ Naive T	GNL3	0	chr3:52682374-52682375	2.81752e-06	0.03453	Soskic2022NG	Soskic-2022-Nat. Genet	rs1176988724
10.1038/s41588-022-01066-3	CL_0000895	Cell-type-specific eQTL	-0.17912	Harvested After 5 D Stimulation	CD4+ Naive T	GNL3	1	chr3:52679290-52679291	4.64311e-06	0.03598	Soskic2022NG	Soskic-2022-Nat. Genet	rs78409212
10.1038/s41588-022-01066-3	CL_0000895	Cell-type-specific eQTL	-0.17006	Harvested After 5 D Stimulation	CD4+ Naive T	GNL3	1	chr3:52677958-52677959	1.29529e-05	0.03615	Soskic2022NG	Soskic-2022-Nat. Genet	rs67539070
10.1038/s41588-022-01066-3	CL_0000895	Cell-type-specific eQTL	-0.17006	Harvested After 5 D Stimulation	CD4+ Naive T	GNL3	1	chr3:52677515-52677516	1.29529e-05	0.03615	Soskic2022NG	Soskic-2022-Nat. Genet	rs9714129
10.1038/s41588-022-01066-3	CL_0000895	Cell-type-specific eQTL	-0.17006	Harvested After 5 D Stimulation	CD4+ Naive T	GNL3	1	chr3:52677456-52677457	1.29529e-05	0.03615	Soskic2022NG	Soskic-2022-Nat. Genet	rs13061253
10.1038/s41588-022-01066-3	CL_0000895	Cell-type-specific eQTL	-0.17006	Harvested After 5 D Stimulation	CD4+ Naive T	GNL3	1	chr3:52676620-52676621	1.29529e-05	0.03615	Soskic2022NG	Soskic-2022-Nat. Genet	rs2336542
10.1038/s41588-022-01066-3	CL_0000895	Cell-type-specific eQTL	-0.17912	Harvested After 5 D Stimulation	CD4+ Naive T	GNL3	0	chr3:52676156-52676157	4.64311e-06	0.03598	Soskic2022NG	Soskic-2022-Nat. Genet	rs62255368
10.1038/s41588-022-01066-3	CL_0000895	Cell-type-specific eQTL	-0.17006	Harvested After 5 D Stimulation	CD4+ Naive T	GNL3	0	chr3:52675815-52675816	1.29529e-05	0.03615	Soskic2022NG	Soskic-2022-Nat. Genet	rs4130905
10.1038/s41588-022-01066-3	CL_0000895	Cell-type-specific eQTL	-0.17006	Harvested After 5 D Stimulation	CD4+ Naive T	GNL3	1	chr3:52675243-52675244	1.29529e-05	0.03615	Soskic2022NG	Soskic-2022-Nat. Genet	rs12496634
10.1038/s41588-022-01066-3	CL_0000895	Cell-type-specific eQTL	-0.17006	Harvested After 5 D Stimulation	CD4+ Naive T	GNL3	0	chr3:52674721-52674722	1.29529e-05	0.03615	Soskic2022NG	Soskic-2022-Nat. Genet	rs12496476
10.1038/s41588-022-01066-3	CL_0000895	Cell-type-specific eQTL	-0.17006	Harvested After 5 D Stimulation	CD4+ Naive T	GNL3	1	chr3:52674413-52674414	1.29529e-05	0.03615	Soskic2022NG	Soskic-2022-Nat. Genet	rs34610142
10.1038/s41588-022-01066-3	CL_0000895	Cell-type-specific eQTL	-0.17006	Harvested After 5 D Stimulation	CD4+ Naive T	GNL3	1	chr3:52674272-52674273	1.29529e-05	0.03615	Soskic2022NG	Soskic-2022-Nat. Genet	rs12632265
10.1038/s41588-022-01066-3	CL_0000895	Cell-type-specific eQTL	-0.17912	Harvested After 5 D Stimulation	CD4+ Naive T	GNL3	0	chr3:52674059-52674060	4.64311e-06	0.03598	Soskic2022NG	Soskic-2022-Nat. Genet	rs6414569
10.1038/s41588-022-01066-3	CL_0000895	Cell-type-specific eQTL	-0.17006	Harvested After 5 D Stimulation	CD4+ Naive T	GNL3	0	chr3:52674057-52674058	1.29529e-05	0.03615	Soskic2022NG	Soskic-2022-Nat. Genet	rs12637632
10.1038/s41588-022-01066-3	CL_0000895	Cell-type-specific eQTL	-0.17006	Harvested After 5 D Stimulation	CD4+ Naive T	GNL3	1	chr3:52673010-52673011	1.29529e-05	0.03615	Soskic2022NG	Soskic-2022-Nat. Genet	rs6803012
10.1038/s41588-022-01066-3	CL_0000895	Cell-type-specific eQTL	-0.17006	Harvested After 5 D Stimulation	CD4+ Naive T	GNL3	1	chr3:52672708-52672709	1.29529e-05	0.03615	Soskic2022NG	Soskic-2022-Nat. Genet	rs12493107
10.1038/s41588-022-01066-3	CL_0000895	Cell-type-specific eQTL	-0.17006	Harvested After 5 D Stimulation	CD4+ Naive T	GNL3	1	chr3:52669599-52669600	1.29529e-05	0.03615	Soskic2022NG	Soskic-2022-Nat. Genet	rs6768697
10.1038/s41588-022-01066-3	CL_0000895	Cell-type-specific eQTL	-0.17006	Harvested After 5 D Stimulation	CD4+ Naive T	GNL3	1	chr3:52667486-52667487	1.29529e-05	0.03615	Soskic2022NG	Soskic-2022-Nat. Genet	rs62255364
10.1038/s41588-022-01066-3	CL_0000895	Cell-type-specific eQTL	-0.17006	Harvested After 5 D Stimulation	CD4+ Naive T	GNL3	1	chr3:52667485-52667486	1.29529e-05	0.03615	Soskic2022NG	Soskic-2022-Nat. Genet	rs77146033
10.1038/s41588-022-01066-3	CL_0000895	Cell-type-specific eQTL	-0.16548	Harvested After 5 D Stimulation	CD4+ Naive T	GNL3	1	chr3:52666461-52666462	9.23187e-06	0.03451	Soskic2022NG	Soskic-2022-Nat. Genet	rs35976524
10.1038/s41588-022-01066-3	CL_0000895	Cell-type-specific eQTL	-0.17006	Harvested After 5 D Stimulation	CD4+ Naive T	GNL3	1	chr3:52665725-52665726	1.29529e-05	0.03615	Soskic2022NG	Soskic-2022-Nat. Genet	rs62255362
10.1038/s41588-022-01066-3	CL_0000895	Cell-type-specific eQTL	-0.17006	Harvested After 5 D Stimulation	CD4+ Naive T	GNL3	1	chr3:52664544-52664545	1.29529e-05	0.03615	Soskic2022NG	Soskic-2022-Nat. Genet	rs12488527
10.1038/s41588-022-01066-3	CL_0000895	Cell-type-specific eQTL	-0.17006	Harvested After 5 D Stimulation	CD4+ Naive T	GNL3	0	chr3:52664401-52664402	1.29529e-05	0.03615	Soskic2022NG	Soskic-2022-Nat. Genet	rs12488461
10.1038/s41588-022-01066-3	CL_0000895	Cell-type-specific eQTL	-0.17006	Harvested After 5 D Stimulation	CD4+ Naive T	GNL3	1	chr3:52663147-52663148	1.29529e-05	0.03615	Soskic2022NG	Soskic-2022-Nat. Genet	rs11130315
10.1038/s41588-022-01066-3	CL_0000895	Cell-type-specific eQTL	-0.17006	Harvested After 5 D Stimulation	CD4+ Naive T	GNL3	1	chr3:52663066-52663067	1.29529e-05	0.03615	Soskic2022NG	Soskic-2022-Nat. Genet	rs11130314
10.1038/s41588-022-01066-3	CL_0000895	Cell-type-specific eQTL	-0.17006	Harvested After 5 D Stimulation	CD4+ Naive T	GNL3	1	chr3:52662782-52662783	1.29529e-05	0.03615	Soskic2022NG	Soskic-2022-Nat. Genet	rs34168767
10.1038/s41588-022-01066-3	CL_0000895	Cell-type-specific eQTL	-0.17912	Harvested After 5 D Stimulation	CD4+ Naive T	GNL3	1	chr3:52660182-52660183	4.64311e-06	0.03598	Soskic2022NG	Soskic-2022-Nat. Genet	rs6804145
10.1038/s41588-022-01066-3	CL_0000895	Cell-type-specific eQTL	-0.17912	Harvested After 5 D Stimulation	CD4+ Naive T	GNL3	1	chr3:52658705-52658706	4.64311e-06	0.03598	Soskic2022NG	Soskic-2022-Nat. Genet	rs7611731
10.1038/s41588-022-01066-3	CL_0000895	Cell-type-specific eQTL	-0.17006	Harvested After 5 D Stimulation	CD4+ Naive T	GNL3	1	chr3:52658343-52658344	1.29529e-05	0.03615	Soskic2022NG	Soskic-2022-Nat. Genet	rs2590846
10.1038/s41588-022-01066-3	CL_0000895	Cell-type-specific eQTL	-0.17912	Harvested After 5 D Stimulation	CD4+ Naive T	GNL3	1	chr3:52658108-52658109	4.64311e-06	0.03598	Soskic2022NG	Soskic-2022-Nat. Genet	rs2336149
10.1038/s41588-022-01066-3	CL_0000895	Cell-type-specific eQTL	-0.17006	Harvested After 5 D Stimulation	CD4+ Naive T	GNL3	1	chr3:52657096-52657097	1.29529e-05	0.03615	Soskic2022NG	Soskic-2022-Nat. Genet	rs12486847
10.1038/s41588-022-01066-3	CL_0000895	Cell-type-specific eQTL	-0.17006	Harvested After 5 D Stimulation	CD4+ Naive T	GNL3	1	chr3:52656928-52656929	1.29529e-05	0.03615	Soskic2022NG	Soskic-2022-Nat. Genet	rs1303380264
10.1038/s41588-022-01066-3	CL_0000895	Cell-type-specific eQTL	-0.17006	Harvested After 5 D Stimulation	CD4+ Naive T	GNL3	1	chr3:52656622-52656623	1.29529e-05	0.03615	Soskic2022NG	Soskic-2022-Nat. Genet	rs2336148
10.1038/s41588-022-01066-3	CL_0000895	Cell-type-specific eQTL	-0.17006	Harvested After 5 D Stimulation	CD4+ Naive T	GNL3	1	chr3:52653670-52653671	1.29529e-05	0.03615	Soskic2022NG	Soskic-2022-Nat. Genet	rs35409678
10.1038/s41588-022-01066-3	CL_0000895	Cell-type-specific eQTL	-0.17912	Harvested After 5 D Stimulation	CD4+ Naive T	GNL3	0	chr3:52653589-52653590	4.64311e-06	0.03598	Soskic2022NG	Soskic-2022-Nat. Genet	rs1168277013
10.1038/s41588-022-01066-3	CL_0000895	Cell-type-specific eQTL	-0.15084	Harvested After 5 D Stimulation	CD4+ Naive T	GNL3	1	chr3:52653550-52653551	8.56584e-05	0.0361	Soskic2022NG	Soskic-2022-Nat. Genet	rs7612511
10.1038/s41588-022-01066-3	CL_0000895	Cell-type-specific eQTL	-0.17912	Harvested After 5 D Stimulation	CD4+ Naive T	GNL3	1	chr3:52653546-52653547	4.64310e-06	0.03598	Soskic2022NG	Soskic-2022-Nat. Genet	rs4435633
10.1038/s41588-022-01066-3	CL_0000895	Cell-type-specific eQTL	-0.17006	Harvested After 5 D Stimulation	CD4+ Naive T	GNL3	1	chr3:52652871-52652872	1.29528e-05	0.03615	Soskic2022NG	Soskic-2022-Nat. Genet	rs6770463
10.1038/s41588-022-01066-3	CL_0000895	Cell-type-specific eQTL	0.16063	Harvested After 5 D Stimulation	CD4+ Naive T	GNL3	1	chr3:52652700-52652701	2.92306e-05	0.03585	Soskic2022NG	Soskic-2022-Nat. Genet	rs2878632
10.1038/s41588-022-01066-3	CL_0000895	Cell-type-specific eQTL	-0.17006	Harvested After 5 D Stimulation	CD4+ Naive T	GNL3	1	chr3:52651289-52651290	1.29529e-05	0.03615	Soskic2022NG	Soskic-2022-Nat. Genet	rs35211965
10.1038/s41588-022-01066-3	CL_0000895	Cell-type-specific eQTL	-0.17006	Harvested After 5 D Stimulation	CD4+ Naive T	GNL3	1	chr3:52651228-52651229	1.29529e-05	0.03615	Soskic2022NG	Soskic-2022-Nat. Genet	rs13065019
10.1038/s41588-022-01066-3	CL_0000895	Cell-type-specific eQTL	-0.17912	Harvested After 5 D Stimulation	CD4+ Naive T	GNL3	1	chr3:52650112-52650113	4.64311e-06	0.03598	Soskic2022NG	Soskic-2022-Nat. Genet	rs62253740
10.1038/s41588-022-01066-3	CL_0000895	Cell-type-specific eQTL	-0.17006	Harvested After 5 D Stimulation	CD4+ Naive T	GNL3	1	chr3:52649848-52649849	1.29529e-05	0.03615	Soskic2022NG	Soskic-2022-Nat. Genet	rs33967311
10.1038/s41588-022-01066-3	CL_0000895	Cell-type-specific eQTL	-0.17006	Harvested After 5 D Stimulation	CD4+ Naive T	GNL3	1	chr3:52648930-52648931	1.29529e-05	0.03615	Soskic2022NG	Soskic-2022-Nat. Genet	rs2289250
10.1038/s41588-022-01066-3	CL_0000895	Cell-type-specific eQTL	-0.17006	Harvested After 5 D Stimulation	CD4+ Naive T	GNL3	1	chr3:52648189-52648190	1.29529e-05	0.03615	Soskic2022NG	Soskic-2022-Nat. Genet	rs34757451
10.1038/s41588-022-01066-3	CL_0000895	Cell-type-specific eQTL	-0.17006	Harvested After 5 D Stimulation	CD4+ Naive T	GNL3	0	chr3:52647916-52647917	1.29529e-05	0.03615	Soskic2022NG	Soskic-2022-Nat. Genet	rs1038463285
10.1038/s41588-022-01066-3	CL_0000895	Cell-type-specific eQTL	-0.17006	Harvested After 5 D Stimulation	CD4+ Naive T	GNL3	1	chr3:52646807-52646808	1.29529e-05	0.03615	Soskic2022NG	Soskic-2022-Nat. Genet	rs2028216
10.1038/s41588-022-01066-3	CL_0000895	Cell-type-specific eQTL	-0.17912	Harvested After 5 D Stimulation	CD4+ Naive T	GNL3	0	chr3:52645272-52645273	4.64311e-06	0.03598	Soskic2022NG	Soskic-2022-Nat. Genet	rs188863100
10.1038/s41588-022-01066-3	CL_0000895	Cell-type-specific eQTL	-0.17006	Harvested After 5 D Stimulation	CD4+ Naive T	GNL3	1	chr3:52644478-52644479	1.29529e-05	0.03615	Soskic2022NG	Soskic-2022-Nat. Genet	rs13086297
10.1038/s41588-022-01066-3	CL_0000895	Cell-type-specific eQTL	-0.17912	Harvested After 5 D Stimulation	CD4+ Naive T	GNL3	1	chr3:52644354-52644355	4.64311e-06	0.03598	Soskic2022NG	Soskic-2022-Nat. Genet	rs13085775
10.1038/s41588-022-01066-3	CL_0000895	Cell-type-specific eQTL	-0.17006	Harvested After 5 D Stimulation	CD4+ Naive T	GNL3	1	chr3:52644254-52644255	1.29529e-05	0.03615	Soskic2022NG	Soskic-2022-Nat. Genet	rs13085895
10.1038/s41588-022-01066-3	CL_0000895	Cell-type-specific eQTL	-0.17006	Harvested After 5 D Stimulation	CD4+ Naive T	GNL3	1	chr3:52643944-52643945	1.29529e-05	0.03615	Soskic2022NG	Soskic-2022-Nat. Genet	rs7642198
10.1038/s41588-022-01066-3	CL_0000895	Cell-type-specific eQTL	-0.17006	Harvested After 5 D Stimulation	CD4+ Naive T	GNL3	1	chr3:52642174-52642175	1.29529e-05	0.03615	Soskic2022NG	Soskic-2022-Nat. Genet	rs11130313
10.1038/s41588-022-01066-3	CL_0000895	Cell-type-specific eQTL	-0.17006	Harvested After 5 D Stimulation	CD4+ Naive T	GNL3	0	chr3:52642049-52642050	1.29529e-05	0.03615	Soskic2022NG	Soskic-2022-Nat. Genet	rs11719685
10.1038/s41588-022-01066-3	CL_0000895	Cell-type-specific eQTL	-0.17006	Harvested After 5 D Stimulation	CD4+ Naive T	GNL3	1	chr3:52641263-52641264	1.29529e-05	0.03615	Soskic2022NG	Soskic-2022-Nat. Genet	rs13086898
10.1038/s41588-022-01066-3	CL_0000895	Cell-type-specific eQTL	-0.17006	Harvested After 5 D Stimulation	CD4+ Naive T	GNL3	1	chr3:52641039-52641040	1.29529e-05	0.03615	Soskic2022NG	Soskic-2022-Nat. Genet	rs11130312
10.1038/s41588-022-01066-3	CL_0000895	Cell-type-specific eQTL	-0.17006	Harvested After 5 D Stimulation	CD4+ Naive T	GNL3	1	chr3:52640989-52640990	1.29529e-05	0.03615	Soskic2022NG	Soskic-2022-Nat. Genet	rs11130311
10.1038/s41588-022-01066-3	CL_0000895	Cell-type-specific eQTL	-0.17912	Harvested After 5 D Stimulation	CD4+ Naive T	GNL3	1	chr3:52640651-52640652	4.64311e-06	0.03598	Soskic2022NG	Soskic-2022-Nat. Genet	rs11130310
10.1038/s41588-022-01066-3	CL_0000895	Cell-type-specific eQTL	-0.17006	Harvested After 5 D Stimulation	CD4+ Naive T	GNL3	1	chr3:52640526-52640527	1.29529e-05	0.03615	Soskic2022NG	Soskic-2022-Nat. Genet	rs13081031
10.1038/s41588-022-01066-3	CL_0000895	Cell-type-specific eQTL	-0.17006	Harvested After 5 D Stimulation	CD4+ Naive T	GNL3	0	chr3:52640284-52640285	1.29529e-05	0.03615	Soskic2022NG	Soskic-2022-Nat. Genet	rs13060675
10.1038/s41588-022-01066-3	CL_0000895	Cell-type-specific eQTL	-0.17006	Harvested After 5 D Stimulation	CD4+ Naive T	GNL3	1	chr3:52638726-52638727	1.29529e-05	0.03615	Soskic2022NG	Soskic-2022-Nat. Genet	rs11720432
10.1038/s41588-022-01066-3	CL_0000895	Cell-type-specific eQTL	-0.17006	Harvested After 5 D Stimulation	CD4+ Naive T	GNL3	1	chr3:52638515-52638516	1.29529e-05	0.03615	Soskic2022NG	Soskic-2022-Nat. Genet	rs11719514
10.1038/s41588-022-01066-3	CL_0000895	Cell-type-specific eQTL	-0.17006	Harvested After 5 D Stimulation	CD4+ Naive T	GNL3	1	chr3:52638151-52638152	1.29529e-05	0.03615	Soskic2022NG	Soskic-2022-Nat. Genet	rs13068293
10.1038/s41588-022-01066-3	CL_0000895	Cell-type-specific eQTL	-0.15084	Harvested After 5 D Stimulation	CD4+ Naive T	GNL3	0	chr3:52636858-52636859	8.56584e-05	0.0361	Soskic2022NG	Soskic-2022-Nat. Genet	rs1013813790
10.1038/s41588-022-01066-3	CL_0000895	Cell-type-specific eQTL	-0.17678	Harvested After 5 D Stimulation	CD4+ Naive T	GNL3	0	chr3:52636757-52636758	5.49968e-06	0.03583	Soskic2022NG	Soskic-2022-Nat. Genet	rs1284592663
10.1038/s41588-022-01066-3	CL_0000895	Cell-type-specific eQTL	-0.17912	Harvested After 5 D Stimulation	CD4+ Naive T	GNL3	1	chr3:52636028-52636029	4.64311e-06	0.03598	Soskic2022NG	Soskic-2022-Nat. Genet	rs13098776
10.1038/s41588-022-01066-3	CL_0000895	Cell-type-specific eQTL	-0.17912	Harvested After 5 D Stimulation	CD4+ Naive T	GNL3	1	chr3:52635373-52635374	4.64311e-06	0.03598	Soskic2022NG	Soskic-2022-Nat. Genet	rs6796726
10.1038/s41588-022-01066-3	CL_0000895	Cell-type-specific eQTL	-0.17912	Harvested After 5 D Stimulation	CD4+ Naive T	GNL3	1	chr3:52634103-52634104	4.64311e-06	0.03598	Soskic2022NG	Soskic-2022-Nat. Genet	rs2083180
10.1038/s41588-022-01066-3	CL_0000895	Cell-type-specific eQTL	-0.17006	Harvested After 5 D Stimulation	CD4+ Naive T	GNL3	1	chr3:52632850-52632851	1.29529e-05	0.03615	Soskic2022NG	Soskic-2022-Nat. Genet	rs13069481
10.1038/s41588-022-01066-3	CL_0000895	Cell-type-specific eQTL	-0.17006	Harvested After 5 D Stimulation	CD4+ Naive T	GNL3	1	chr3:52632634-52632635	1.29529e-05	0.03615	Soskic2022NG	Soskic-2022-Nat. Genet	rs4687548
10.1038/s41588-022-01066-3	CL_0000895	Cell-type-specific eQTL	-0.17912	Harvested After 5 D Stimulation	CD4+ Naive T	GNL3	1	chr3:52629866-52629867	4.64311e-06	0.03598	Soskic2022NG	Soskic-2022-Nat. Genet	rs7622694
10.1038/s41588-022-01066-3	CL_0000895	Cell-type-specific eQTL	-0.17912	Harvested After 5 D Stimulation	CD4+ Naive T	GNL3	1	chr3:52628706-52628707	4.64311e-06	0.03598	Soskic2022NG	Soskic-2022-Nat. Genet	rs6445529
10.1038/s41588-022-01066-3	CL_0000895	Cell-type-specific eQTL	-0.17557	Harvested After 5 D Stimulation	CD4+ Naive T	GNL3	0	chr3:52628474-52628475	2.14374e-06	0.03389	Soskic2022NG	Soskic-2022-Nat. Genet	rs200377224
10.1038/s41588-022-01066-3	CL_0000895	Cell-type-specific eQTL	-0.17006	Harvested After 5 D Stimulation	CD4+ Naive T	GNL3	1	chr3:52627624-52627625	1.29529e-05	0.03615	Soskic2022NG	Soskic-2022-Nat. Genet	rs35249778
10.1038/s41588-022-01066-3	CL_0000895	Cell-type-specific eQTL	-0.17006	Harvested After 5 D Stimulation	CD4+ Naive T	GNL3	1	chr3:52625947-52625948	1.29529e-05	0.03615	Soskic2022NG	Soskic-2022-Nat. Genet	rs1561337
10.1038/s41588-022-01066-3	CL_0000895	Cell-type-specific eQTL	-0.17006	Harvested After 5 D Stimulation	CD4+ Naive T	GNL3	1	chr3:52625108-52625109	1.29529e-05	0.03615	Soskic2022NG	Soskic-2022-Nat. Genet	rs34215106
10.1038/s41588-022-01066-3	CL_0000895	Cell-type-specific eQTL	-0.17006	Harvested After 5 D Stimulation	CD4+ Naive T	GNL3	1	chr3:52623456-52623457	1.29529e-05	0.03615	Soskic2022NG	Soskic-2022-Nat. Genet	rs34537256
10.1038/s41588-022-01066-3	CL_0000895	Cell-type-specific eQTL	-0.17006	Harvested After 5 D Stimulation	CD4+ Naive T	GNL3	1	chr3:52622986-52622987	1.29529e-05	0.03615	Soskic2022NG	Soskic-2022-Nat. Genet	rs13064064
10.1038/s41588-022-01066-3	CL_0000895	Cell-type-specific eQTL	-0.17006	Harvested After 5 D Stimulation	CD4+ Naive T	GNL3	1	chr3:52622324-52622325	1.29529e-05	0.03615	Soskic2022NG	Soskic-2022-Nat. Genet	rs4687639
10.1038/s41588-022-01066-3	CL_0000895	Cell-type-specific eQTL	-0.17006	Harvested After 5 D Stimulation	CD4+ Naive T	GNL3	1	chr3:52622076-52622077	1.29529e-05	0.03615	Soskic2022NG	Soskic-2022-Nat. Genet	rs11717043
10.1038/s41588-022-01066-3	CL_0000895	Cell-type-specific eQTL	-0.17912	Harvested After 5 D Stimulation	CD4+ Naive T	GNL3	1	chr3:52621399-52621400	4.64311e-06	0.03598	Soskic2022NG	Soskic-2022-Nat. Genet	rs34341238
10.1038/s41588-022-01066-3	CL_0000895	Cell-type-specific eQTL	-0.17006	Harvested After 5 D Stimulation	CD4+ Naive T	GNL3	1	chr3:52619398-52619399	1.29529e-05	0.03615	Soskic2022NG	Soskic-2022-Nat. Genet	rs62253733
10.1038/s41588-022-01066-3	CL_0000895	Cell-type-specific eQTL	-0.17006	Harvested After 5 D Stimulation	CD4+ Naive T	GNL3	0	chr3:52617950-52617951	1.29529e-05	0.03615	Soskic2022NG	Soskic-2022-Nat. Genet	rs4687638
10.1038/s41588-022-01066-3	CL_0000895	Cell-type-specific eQTL	-0.16548	Harvested After 5 D Stimulation	CD4+ Naive T	GNL3	1	chr3:52616332-52616333	9.23187e-06	0.03451	Soskic2022NG	Soskic-2022-Nat. Genet	rs10510760
10.1038/s41588-022-01066-3	CL_0000895	Cell-type-specific eQTL	-0.15084	Harvested After 5 D Stimulation	CD4+ Naive T	GNL3	1	chr3:52615732-52615733	8.56584e-05	0.0361	Soskic2022NG	Soskic-2022-Nat. Genet	rs13083798
10.1038/s41588-022-01066-3	CL_0000895	Cell-type-specific eQTL	0.16063	Harvested After 5 D Stimulation	CD4+ Naive T	GNL3	1	chr3:52614249-52614250	2.92306e-05	0.03585	Soskic2022NG	Soskic-2022-Nat. Genet	rs9879090
10.1038/s41588-022-01066-3	CL_0000895	Cell-type-specific eQTL	-0.17006	Harvested After 5 D Stimulation	CD4+ Naive T	GNL3	1	chr3:52613433-52613434	1.29529e-05	0.03615	Soskic2022NG	Soskic-2022-Nat. Genet	rs11709448
10.1038/s41588-022-01066-3	CL_0000895	Cell-type-specific eQTL	-0.17006	Harvested After 5 D Stimulation	CD4+ Naive T	GNL3	1	chr3:52612887-52612888	1.29529e-05	0.03615	Soskic2022NG	Soskic-2022-Nat. Genet	rs1031012309
10.1038/s41588-022-01066-3	CL_0000895	Cell-type-specific eQTL	-0.17006	Harvested After 5 D Stimulation	CD4+ Naive T	GNL3	1	chr3:52610820-52610821	1.29529e-05	0.03615	Soskic2022NG	Soskic-2022-Nat. Genet	rs13065851
10.1038/s41588-022-01066-3	CL_0000895	Cell-type-specific eQTL	-0.17006	Harvested After 5 D Stimulation	CD4+ Naive T	GNL3	1	chr3:52609669-52609670	1.29529e-05	0.03615	Soskic2022NG	Soskic-2022-Nat. Genet	rs3755806
10.1038/s41588-022-01066-3	CL_0000895	Cell-type-specific eQTL	-0.17912	Harvested After 5 D Stimulation	CD4+ Naive T	GNL3	1	chr3:52609291-52609292	4.64311e-06	0.03598	Soskic2022NG	Soskic-2022-Nat. Genet	rs3733045
10.1038/s41588-022-01066-3	CL_0000895	Cell-type-specific eQTL	-0.17006	Harvested After 5 D Stimulation	CD4+ Naive T	GNL3	1	chr3:52608920-52608921	1.29529e-05	0.03615	Soskic2022NG	Soskic-2022-Nat. Genet	rs12487591
10.1038/s41588-022-01066-3	CL_0000895	Cell-type-specific eQTL	-0.17006	Harvested After 5 D Stimulation	CD4+ Naive T	GNL3	1	chr3:52608471-52608472	1.29529e-05	0.03615	Soskic2022NG	Soskic-2022-Nat. Genet	rs3774365
10.1038/s41588-022-01066-3	CL_0000895	Cell-type-specific eQTL	-0.17912	Harvested After 5 D Stimulation	CD4+ Naive T	GNL3	1	chr3:52607239-52607240	4.64311e-06	0.03598	Soskic2022NG	Soskic-2022-Nat. Genet	rs3774366
10.1038/s41588-022-01066-3	CL_0000895	Cell-type-specific eQTL	-0.17912	Harvested After 5 D Stimulation	CD4+ Naive T	GNL3	1	chr3:52605241-52605242	4.64311e-06	0.03598	Soskic2022NG	Soskic-2022-Nat. Genet	rs11130308
10.1038/s41588-022-01066-3	CL_0000895	Cell-type-specific eQTL	-0.17006	Harvested After 5 D Stimulation	CD4+ Naive T	GNL3	1	chr3:52604466-52604467	1.29529e-05	0.03615	Soskic2022NG	Soskic-2022-Nat. Genet	rs10433615
10.1038/s41588-022-01066-3	CL_0000895	Cell-type-specific eQTL	0.16063	Harvested After 5 D Stimulation	CD4+ Naive T	GNL3	1	chr3:52603470-52603471	2.92306e-05	0.03585	Soskic2022NG	Soskic-2022-Nat. Genet	rs2276824
10.1038/s41588-022-01066-3	CL_0000895	Cell-type-specific eQTL	-0.17912	Harvested After 5 D Stimulation	CD4+ Naive T	GNL3	1	chr3:52600603-52600604	4.64311e-06	0.03598	Soskic2022NG	Soskic-2022-Nat. Genet	rs9917834
10.1038/s41588-022-01066-3	CL_0000895	Cell-type-specific eQTL	-0.17006	Harvested After 5 D Stimulation	CD4+ Naive T	GNL3	1	chr3:52600589-52600590	1.29529e-05	0.03615	Soskic2022NG	Soskic-2022-Nat. Genet	rs34173654
10.1038/s41588-022-01066-3	CL_0000895	Cell-type-specific eQTL	-0.17912	Harvested After 5 D Stimulation	CD4+ Naive T	GNL3	1	chr3:52600076-52600077	4.64311e-06	0.03598	Soskic2022NG	Soskic-2022-Nat. Genet	rs4687637
10.1038/s41588-022-01066-3	CL_0000895	Cell-type-specific eQTL	-0.17006	Harvested After 5 D Stimulation	CD4+ Naive T	GNL3	1	chr3:52599913-52599914	1.29529e-05	0.03615	Soskic2022NG	Soskic-2022-Nat. Genet	rs4687636
10.1038/s41588-022-01066-3	CL_0000895	Cell-type-specific eQTL	-0.17006	Harvested After 5 D Stimulation	CD4+ Naive T	GNL3	0	chr3:52599655-52599656	1.29529e-05	0.03615	Soskic2022NG	Soskic-2022-Nat. Genet	rs1053940368
10.1038/s41588-022-01066-3	CL_0000895	Cell-type-specific eQTL	-0.17006	Harvested After 5 D Stimulation	CD4+ Naive T	GNL3	1	chr3:52598895-52598896	1.29529e-05	0.03615	Soskic2022NG	Soskic-2022-Nat. Genet	rs6790330
10.1038/s41588-022-01066-3	CL_0000895	Cell-type-specific eQTL	-0.17006	Harvested After 5 D Stimulation	CD4+ Naive T	GNL3	1	chr3:52598341-52598342	1.29529e-05	0.03615	Soskic2022NG	Soskic-2022-Nat. Genet	rs62253703
10.1038/s41588-022-01066-3	CL_0000895	Cell-type-specific eQTL	-0.17006	Harvested After 5 D Stimulation	CD4+ Naive T	GNL3	1	chr3:52596532-52596533	1.29529e-05	0.03615	Soskic2022NG	Soskic-2022-Nat. Genet	rs4687633
10.1038/s41588-022-01066-3	CL_0000895	Cell-type-specific eQTL	-0.17006	Harvested After 5 D Stimulation	CD4+ Naive T	GNL3	1	chr3:52595734-52595735	1.29529e-05	0.03615	Soskic2022NG	Soskic-2022-Nat. Genet	rs2336145
10.1038/s41588-022-01066-3	CL_0000895	Cell-type-specific eQTL	-0.17006	Harvested After 5 D Stimulation	CD4+ Naive T	GNL3	1	chr3:52595617-52595618	1.29529e-05	0.03615	Soskic2022NG	Soskic-2022-Nat. Genet	rs2164884
10.1038/s41588-022-01066-3	CL_0000895	Cell-type-specific eQTL	-0.17006	Harvested After 5 D Stimulation	CD4+ Naive T	GNL3	1	chr3:52595370-52595371	1.29529e-05	0.03615	Soskic2022NG	Soskic-2022-Nat. Genet	rs2118540
10.1038/s41588-022-01066-3	CL_0000895	Cell-type-specific eQTL	-0.17912	Harvested After 5 D Stimulation	CD4+ Naive T	GNL3	1	chr3:52595161-52595162	4.64311e-06	0.03598	Soskic2022NG	Soskic-2022-Nat. Genet	rs34754793
10.1038/s41588-022-01066-3	CL_0000895	Cell-type-specific eQTL	-0.17006	Harvested After 5 D Stimulation	CD4+ Naive T	GNL3	1	chr3:52594800-52594801	1.29529e-05	0.03615	Soskic2022NG	Soskic-2022-Nat. Genet	rs11714419
10.1038/s41588-022-01066-3	CL_0000895	Cell-type-specific eQTL	-0.17006	Harvested After 5 D Stimulation	CD4+ Naive T	GNL3	1	chr3:52594305-52594306	1.29529e-05	0.03615	Soskic2022NG	Soskic-2022-Nat. Genet	rs7628578
10.1038/s41588-022-01066-3	CL_0000895	Cell-type-specific eQTL	-0.1421	Harvested After 5 D Stimulation	CD4+ Naive T	GNL3	1	chr3:52594040-52594041	1.96113e-04	0.03608	Soskic2022NG	Soskic-2022-Nat. Genet	rs2577831
10.1038/s41588-022-01066-3	CL_0000895	Cell-type-specific eQTL	-0.17006	Harvested After 5 D Stimulation	CD4+ Naive T	GNL3	1	chr3:52593644-52593645	1.29529e-05	0.03615	Soskic2022NG	Soskic-2022-Nat. Genet	rs12498066
10.1038/s41588-022-01066-3	CL_0000895	Cell-type-specific eQTL	-0.17006	Harvested After 5 D Stimulation	CD4+ Naive T	GNL3	1	chr3:52593470-52593471	1.29529e-05	0.03615	Soskic2022NG	Soskic-2022-Nat. Genet	rs13085331
10.1038/s41588-022-01066-3	CL_0000895	Cell-type-specific eQTL	-0.17912	Harvested After 5 D Stimulation	CD4+ Naive T	GNL3	1	chr3:52592630-52592631	4.64311e-06	0.03598	Soskic2022NG	Soskic-2022-Nat. Genet	rs2336146
10.1038/s41588-022-01066-3	CL_0000895	Cell-type-specific eQTL	-0.15084	Harvested After 5 D Stimulation	CD4+ Naive T	GNL3	1	chr3:52592427-52592428	8.56584e-05	0.0361	Soskic2022NG	Soskic-2022-Nat. Genet	rs2336147
10.1038/s41588-022-01066-3	CL_0000895	Cell-type-specific eQTL	-0.17006	Harvested After 5 D Stimulation	CD4+ Naive T	GNL3	1	chr3:52591003-52591004	1.29529e-05	0.03615	Soskic2022NG	Soskic-2022-Nat. Genet	rs62253700
10.1038/s41588-022-01066-3	CL_0000895	Cell-type-specific eQTL	-0.17006	Harvested After 5 D Stimulation	CD4+ Naive T	GNL3	1	chr3:52590753-52590754	1.29529e-05	0.03615	Soskic2022NG	Soskic-2022-Nat. Genet	rs68021750
10.1038/s41588-022-01066-3	CL_0000895	Cell-type-specific eQTL	-0.17006	Harvested After 5 D Stimulation	CD4+ Naive T	GNL3	1	chr3:52590707-52590708	1.29529e-05	0.03615	Soskic2022NG	Soskic-2022-Nat. Genet	rs11708075
10.1038/s41588-022-01066-3	CL_0000895	Cell-type-specific eQTL	-0.17006	Harvested After 5 D Stimulation	CD4+ Naive T	GNL3	1	chr3:52590217-52590218	1.29529e-05	0.03615	Soskic2022NG	Soskic-2022-Nat. Genet	rs4336110
10.1038/s41588-022-01066-3	CL_0000895	Cell-type-specific eQTL	-0.15084	Harvested After 5 D Stimulation	CD4+ Naive T	GNL3	1	chr3:52588070-52588071	8.56584e-05	0.0361	Soskic2022NG	Soskic-2022-Nat. Genet	rs2590838
10.1038/s41588-022-01066-3	CL_0000895	Cell-type-specific eQTL	-0.17912	Harvested After 5 D Stimulation	CD4+ Naive T	GNL3	1	chr3:52587823-52587824	4.64311e-06	0.03598	Soskic2022NG	Soskic-2022-Nat. Genet	rs3852066
10.1038/s41588-022-01066-3	CL_0000895	Cell-type-specific eQTL	-0.17912	Harvested After 5 D Stimulation	CD4+ Naive T	GNL3	1	chr3:52587611-52587612	4.64311e-06	0.03598	Soskic2022NG	Soskic-2022-Nat. Genet	rs3733046
10.1038/s41588-022-01066-3	CL_0000895	Cell-type-specific eQTL	-0.17912	Harvested After 5 D Stimulation	CD4+ Naive T	GNL3	0	chr3:52585946-52585947	4.64311e-06	0.03598	Soskic2022NG	Soskic-2022-Nat. Genet	rs12637627
10.1038/s41588-022-01066-3	CL_0000895	Cell-type-specific eQTL	-0.17912	Harvested After 5 D Stimulation	CD4+ Naive T	GNL3	1	chr3:52585820-52585821	4.64311e-06	0.03598	Soskic2022NG	Soskic-2022-Nat. Genet	rs12629701
10.1038/s41588-022-01066-3	CL_0000895	Cell-type-specific eQTL	-0.17912	Harvested After 5 D Stimulation	CD4+ Naive T	GNL3	1	chr3:52585776-52585777	4.64311e-06	0.03598	Soskic2022NG	Soskic-2022-Nat. Genet	rs12629699
10.1038/s41588-022-01066-3	CL_0000895	Cell-type-specific eQTL	-0.17912	Harvested After 5 D Stimulation	CD4+ Naive T	GNL3	0	chr3:52584925-52584926	4.64311e-06	0.03598	Soskic2022NG	Soskic-2022-Nat. Genet	rs7614498
10.1038/s41588-022-01066-3	CL_0000895	Cell-type-specific eQTL	-0.17006	Harvested After 5 D Stimulation	CD4+ Naive T	GNL3	1	chr3:52584303-52584304	1.29529e-05	0.03615	Soskic2022NG	Soskic-2022-Nat. Genet	rs12487445
10.1038/s41588-022-01066-3	CL_0000895	Cell-type-specific eQTL	-0.17912	Harvested After 5 D Stimulation	CD4+ Naive T	GNL3	1	chr3:52584002-52584003	4.64311e-06	0.03598	Soskic2022NG	Soskic-2022-Nat. Genet	rs11720243
10.1038/s41588-022-01066-3	CL_0000895	Cell-type-specific eQTL	-0.17912	Harvested After 5 D Stimulation	CD4+ Naive T	GNL3	1	chr3:52583786-52583787	4.64311e-06	0.03598	Soskic2022NG	Soskic-2022-Nat. Genet	rs11720159
10.1038/s41588-022-01066-3	CL_0000895	Cell-type-specific eQTL	-0.17006	Harvested After 5 D Stimulation	CD4+ Naive T	GNL3	1	chr3:52582962-52582963	1.29529e-05	0.03615	Soskic2022NG	Soskic-2022-Nat. Genet	rs13078422
10.1038/s41588-022-01066-3	CL_0000895	Cell-type-specific eQTL	-0.18712	Harvested After 5 D Stimulation	CD4+ Naive T	GNL3	0	chr3:52582241-52582242	8.43383e-07	0.03451	Soskic2022NG	Soskic-2022-Nat. Genet	rs868190462
10.1038/s41588-022-01066-3	CL_0000895	Cell-type-specific eQTL	-0.17006	Harvested After 5 D Stimulation	CD4+ Naive T	GNL3	1	chr3:52581285-52581286	1.29529e-05	0.03615	Soskic2022NG	Soskic-2022-Nat. Genet	rs4687630
10.1038/s41588-022-01066-3	CL_0000895	Cell-type-specific eQTL	-0.17912	Harvested After 5 D Stimulation	CD4+ Naive T	GNL3	1	chr3:52581211-52581212	4.64311e-06	0.03598	Soskic2022NG	Soskic-2022-Nat. Genet	rs4687629
10.1038/s41588-022-01066-3	CL_0000895	Cell-type-specific eQTL	-0.17006	Harvested After 5 D Stimulation	CD4+ Naive T	GNL3	1	chr3:52580654-52580655	1.29529e-05	0.03615	Soskic2022NG	Soskic-2022-Nat. Genet	rs11718509
10.1038/s41588-022-01066-3	CL_0000895	Cell-type-specific eQTL	-0.17006	Harvested After 5 D Stimulation	CD4+ Naive T	GNL3	1	chr3:52579640-52579641	1.29529e-05	0.03615	Soskic2022NG	Soskic-2022-Nat. Genet	rs35107891
10.1038/s41588-022-01066-3	CL_0000895	Cell-type-specific eQTL	-0.17006	Harvested After 5 D Stimulation	CD4+ Naive T	GNL3	1	chr3:52578162-52578163	1.29529e-05	0.03615	Soskic2022NG	Soskic-2022-Nat. Genet	rs34115864
10.1038/s41588-022-01066-3	CL_0000895	Cell-type-specific eQTL	-0.17006	Harvested After 5 D Stimulation	CD4+ Naive T	GNL3	1	chr3:52578143-52578144	1.29529e-05	0.03615	Soskic2022NG	Soskic-2022-Nat. Genet	rs34954168
10.1038/s41588-022-01066-3	CL_0000895	Cell-type-specific eQTL	-0.17912	Harvested After 5 D Stimulation	CD4+ Naive T	GNL3	0	chr3:52577430-52577431	4.64311e-06	0.03598	Soskic2022NG	Soskic-2022-Nat. Genet	rs1332349892
10.1038/s41588-022-01066-3	CL_0000895	Cell-type-specific eQTL	-0.17912	Harvested After 5 D Stimulation	CD4+ Naive T	GNL3	1	chr3:52577397-52577398	4.64311e-06	0.03598	Soskic2022NG	Soskic-2022-Nat. Genet	rs11718420
10.1038/s41588-022-01066-3	CL_0000895	Cell-type-specific eQTL	-0.17006	Harvested After 5 D Stimulation	CD4+ Naive T	GNL3	1	chr3:52576635-52576636	1.29529e-05	0.03615	Soskic2022NG	Soskic-2022-Nat. Genet	rs17264436
10.1038/s41588-022-01066-3	CL_0000895	Cell-type-specific eQTL	-0.17912	Harvested After 5 D Stimulation	CD4+ Naive T	GNL3	1	chr3:52576399-52576400	4.64311e-06	0.03598	Soskic2022NG	Soskic-2022-Nat. Genet	rs7652191
10.1038/s41588-022-01066-3	CL_0000895	Cell-type-specific eQTL	-0.17006	Harvested After 5 D Stimulation	CD4+ Naive T	GNL3	0	chr3:52575694-52575695	1.29529e-05	0.03615	Soskic2022NG	Soskic-2022-Nat. Genet	rs6805539
10.1038/s41588-022-01066-3	CL_0000895	Cell-type-specific eQTL	-0.17006	Harvested After 5 D Stimulation	CD4+ Naive T	GNL3	0	chr3:52575672-52575673	1.29529e-05	0.03615	Soskic2022NG	Soskic-2022-Nat. Genet	rs1451935477
10.1038/s41588-022-01066-3	CL_0000895	Cell-type-specific eQTL	-0.17912	Harvested After 5 D Stimulation	CD4+ Naive T	GNL3	1	chr3:52575346-52575347	4.64311e-06	0.03598	Soskic2022NG	Soskic-2022-Nat. Genet	rs6805156
10.1038/s41588-022-01066-3	CL_0000895	Cell-type-specific eQTL	-0.17006	Harvested After 5 D Stimulation	CD4+ Naive T	GNL3	1	chr3:52575141-52575142	1.29529e-05	0.03615	Soskic2022NG	Soskic-2022-Nat. Genet	rs6762457
10.1038/s41588-022-01066-3	CL_0000895	Cell-type-specific eQTL	-0.17006	Harvested After 5 D Stimulation	CD4+ Naive T	GNL3	1	chr3:52574933-52574934	1.29529e-05	0.03615	Soskic2022NG	Soskic-2022-Nat. Genet	rs4687547
10.1038/s41588-022-01066-3	CL_0000895	Cell-type-specific eQTL	-0.16456	Harvested After 5 D Stimulation	CD4+ Naive T	GNL3	1	chr3:52573669-52573670	2.04911e-05	0.03594	Soskic2022NG	Soskic-2022-Nat. Genet	rs12632381
10.1038/s41588-022-01066-3	CL_0000895	Cell-type-specific eQTL	-0.16456	Harvested After 5 D Stimulation	CD4+ Naive T	GNL3	1	chr3:52573666-52573667	2.04911e-05	0.03594	Soskic2022NG	Soskic-2022-Nat. Genet	rs11130307
10.1038/s41588-022-01066-3	CL_0000895	Cell-type-specific eQTL	-0.17455	Harvested After 5 D Stimulation	CD4+ Naive T	GNL3	1	chr3:52572350-52572351	7.08278e-06	0.03587	Soskic2022NG	Soskic-2022-Nat. Genet	rs7625743
10.1038/s41588-022-01066-3	CL_0000895	Cell-type-specific eQTL	-0.17455	Harvested After 5 D Stimulation	CD4+ Naive T	GNL3	1	chr3:52572276-52572277	7.08278e-06	0.03587	Soskic2022NG	Soskic-2022-Nat. Genet	rs11714565
10.1038/s41588-022-01066-3	CL_0000895	Cell-type-specific eQTL	-0.16456	Harvested After 5 D Stimulation	CD4+ Naive T	GNL3	1	chr3:52571958-52571959	2.04911e-05	0.03594	Soskic2022NG	Soskic-2022-Nat. Genet	rs7623199
10.1038/s41588-022-01066-3	CL_0000895	Cell-type-specific eQTL	-0.17455	Harvested After 5 D Stimulation	CD4+ Naive T	GNL3	1	chr3:52571927-52571928	7.08278e-06	0.03587	Soskic2022NG	Soskic-2022-Nat. Genet	rs4687546
10.1038/s41588-022-01066-3	CL_0000895	Cell-type-specific eQTL	-0.17455	Harvested After 5 D Stimulation	CD4+ Naive T	GNL3	1	chr3:52571120-52571121	7.08278e-06	0.03587	Soskic2022NG	Soskic-2022-Nat. Genet	rs6788993
10.1038/s41588-022-01066-3	CL_0000895	Cell-type-specific eQTL	-0.17455	Harvested After 5 D Stimulation	CD4+ Naive T	GNL3	1	chr3:52570989-52570990	7.08278e-06	0.03587	Soskic2022NG	Soskic-2022-Nat. Genet	rs6788887
10.1038/s41588-022-01066-3	CL_0000895	Cell-type-specific eQTL	-0.17455	Harvested After 5 D Stimulation	CD4+ Naive T	GNL3	1	chr3:52570845-52570846	7.08278e-06	0.03587	Soskic2022NG	Soskic-2022-Nat. Genet	rs6786043
10.1038/s41588-022-01066-3	CL_0000895	Cell-type-specific eQTL	-0.17455	Harvested After 5 D Stimulation	CD4+ Naive T	GNL3	1	chr3:52570164-52570165	7.08278e-06	0.03587	Soskic2022NG	Soskic-2022-Nat. Genet	rs9758945
10.1038/s41588-022-01066-3	CL_0000895	Cell-type-specific eQTL	-0.17455	Harvested After 5 D Stimulation	CD4+ Naive T	GNL3	1	chr3:52569336-52569337	7.08278e-06	0.03587	Soskic2022NG	Soskic-2022-Nat. Genet	rs10433550
10.1038/s41588-022-01066-3	CL_0000895	Cell-type-specific eQTL	-0.17455	Harvested After 5 D Stimulation	CD4+ Naive T	GNL3	1	chr3:52568258-52568259	7.08278e-06	0.03587	Soskic2022NG	Soskic-2022-Nat. Genet	rs13063160
10.1038/s41588-022-01066-3	CL_0000895	Cell-type-specific eQTL	-0.17455	Harvested After 5 D Stimulation	CD4+ Naive T	GNL3	1	chr3:52566983-52566984	7.08278e-06	0.03587	Soskic2022NG	Soskic-2022-Nat. Genet	rs1821879
10.1038/s41588-022-01066-3	CL_0000895	Cell-type-specific eQTL	-0.16456	Harvested After 5 D Stimulation	CD4+ Naive T	GNL3	1	chr3:52565906-52565907	2.04911e-05	0.03594	Soskic2022NG	Soskic-2022-Nat. Genet	rs6798246
10.1038/s41588-022-01066-3	CL_0000895	Cell-type-specific eQTL	-0.17455	Harvested After 5 D Stimulation	CD4+ Naive T	GNL3	1	chr3:52565773-52565774	7.08278e-06	0.03587	Soskic2022NG	Soskic-2022-Nat. Genet	rs6786919
10.1038/s41588-022-01066-3	CL_0000895	Cell-type-specific eQTL	-0.17455	Harvested After 5 D Stimulation	CD4+ Naive T	GNL3	0	chr3:52564652-52564653	7.08278e-06	0.03587	Soskic2022NG	Soskic-2022-Nat. Genet	rs1282689613
10.1038/s41588-022-01066-3	CL_0000895	Cell-type-specific eQTL	-0.17455	Harvested After 5 D Stimulation	CD4+ Naive T	GNL3	1	chr3:52564592-52564593	7.08278e-06	0.03587	Soskic2022NG	Soskic-2022-Nat. Genet	rs13060048
10.1038/s41588-022-01066-3	CL_0000895	Cell-type-specific eQTL	-0.17455	Harvested After 5 D Stimulation	CD4+ Naive T	GNL3	1	chr3:52564524-52564525	7.08278e-06	0.03587	Soskic2022NG	Soskic-2022-Nat. Genet	rs13059862
10.1038/s41588-022-01066-3	CL_0000895	Cell-type-specific eQTL	-0.16456	Harvested After 5 D Stimulation	CD4+ Naive T	GNL3	1	chr3:52563648-52563649	2.04911e-05	0.03594	Soskic2022NG	Soskic-2022-Nat. Genet	rs2289249
10.1038/s41588-022-01066-3	CL_0000895	Cell-type-specific eQTL	-0.16456	Harvested After 5 D Stimulation	CD4+ Naive T	GNL3	1	chr3:52562898-52562899	2.04911e-05	0.03594	Soskic2022NG	Soskic-2022-Nat. Genet	rs33964154
10.1038/s41588-022-01066-3	CL_0000895	Cell-type-specific eQTL	-0.16456	Harvested After 5 D Stimulation	CD4+ Naive T	GNL3	1	chr3:52562382-52562383	2.04911e-05	0.03594	Soskic2022NG	Soskic-2022-Nat. Genet	rs6778844
10.1038/s41588-022-01066-3	CL_0000895	Cell-type-specific eQTL	-0.17455	Harvested After 5 D Stimulation	CD4+ Naive T	GNL3	0	chr3:52559946-52559947	7.08278e-06	0.03587	Soskic2022NG	Soskic-2022-Nat. Genet	rs1453579537
10.1038/s41588-022-01066-3	CL_0000895	Cell-type-specific eQTL	-0.15354	Harvested After 5 D Stimulation	CD4+ Naive T	GNL3	0	chr3:52559846-52559847	2.44730e-04	0.03965	Soskic2022NG	Soskic-2022-Nat. Genet	rs373806231
10.1038/s41588-022-01066-3	CL_0000895	Cell-type-specific eQTL	-0.17455	Harvested After 5 D Stimulation	CD4+ Naive T	GNL3	1	chr3:52559214-52559215	7.08278e-06	0.03587	Soskic2022NG	Soskic-2022-Nat. Genet	rs3796353
10.1038/s41588-022-01066-3	CL_0000895	Cell-type-specific eQTL	-0.17455	Harvested After 5 D Stimulation	CD4+ Naive T	GNL3	1	chr3:52559122-52559123	7.08278e-06	0.03587	Soskic2022NG	Soskic-2022-Nat. Genet	rs17052259
10.1038/s41588-022-01066-3	CL_0000895	Cell-type-specific eQTL	-0.17455	Harvested After 5 D Stimulation	CD4+ Naive T	GNL3	1	chr3:52559103-52559104	7.08278e-06	0.03587	Soskic2022NG	Soskic-2022-Nat. Genet	rs17052256
10.1038/s41588-022-01066-3	CL_0000895	Cell-type-specific eQTL	-0.17455	Harvested After 5 D Stimulation	CD4+ Naive T	GNL3	1	chr3:52552666-52552667	7.08278e-06	0.03587	Soskic2022NG	Soskic-2022-Nat. Genet	rs1570
10.1038/s41588-022-01066-3	CL_0000895	Cell-type-specific eQTL	-0.16456	Harvested After 5 D Stimulation	CD4+ Naive T	GNL3	1	chr3:52551974-52551975	2.04911e-05	0.03594	Soskic2022NG	Soskic-2022-Nat. Genet	rs1961958
10.1038/s41588-022-01066-3	CL_0000895	Cell-type-specific eQTL	-0.16456	Harvested After 5 D Stimulation	CD4+ Naive T	GNL3	1	chr3:52551744-52551745	2.04911e-05	0.03594	Soskic2022NG	Soskic-2022-Nat. Genet	rs1961959
10.1038/s41588-022-01066-3	CL_0000895	Cell-type-specific eQTL	-0.16456	Harvested After 5 D Stimulation	CD4+ Naive T	GNL3	1	chr3:52550771-52550772	2.04911e-05	0.03594	Soskic2022NG	Soskic-2022-Nat. Genet	rs2251219
10.1038/s41588-022-01066-3	CL_0000895	Cell-type-specific eQTL	-0.17455	Harvested After 5 D Stimulation	CD4+ Naive T	GNL3	1	chr3:52550699-52550700	7.08278e-06	0.03587	Soskic2022NG	Soskic-2022-Nat. Genet	rs2878628
10.1038/s41588-022-01066-3	CL_0000895	Cell-type-specific eQTL	-0.14466	Harvested After 5 D Stimulation	CD4+ Naive T	GNL3	1	chr3:52541815-52541816	7.08519e-05	0.03418	Soskic2022NG	Soskic-2022-Nat. Genet	rs1133415
10.1038/s41588-022-01066-3	CL_0000895	Cell-type-specific eQTL	-0.13576	Harvested After 5 D Stimulation	CD4+ Naive T	GNL3	1	chr3:52539828-52539829	1.67697e-04	0.03408	Soskic2022NG	Soskic-2022-Nat. Genet	rs62256903
10.1038/s41588-022-01066-3	CL_0000895	Cell-type-specific eQTL	-0.13576	Harvested After 5 D Stimulation	CD4+ Naive T	GNL3	1	chr3:52539080-52539081	1.67697e-04	0.03408	Soskic2022NG	Soskic-2022-Nat. Genet	rs13076398
10.1038/s41588-022-01066-3	CL_0000895	Cell-type-specific eQTL	-0.14466	Harvested After 5 D Stimulation	CD4+ Naive T	GNL3	1	chr3:52538431-52538432	7.08519e-05	0.03418	Soskic2022NG	Soskic-2022-Nat. Genet	rs6445528
10.1038/s41588-022-01066-3	CL_0000895	Cell-type-specific eQTL	-0.14466	Harvested After 5 D Stimulation	CD4+ Naive T	GNL3	1	chr3:52538040-52538041	7.08519e-05	0.03418	Soskic2022NG	Soskic-2022-Nat. Genet	rs7638808
10.1038/s41588-022-01066-3	CL_0000895	Cell-type-specific eQTL	-0.13576	Harvested After 5 D Stimulation	CD4+ Naive T	GNL3	1	chr3:52535082-52535083	1.67697e-04	0.03408	Soskic2022NG	Soskic-2022-Nat. Genet	rs4687626
10.1038/s41588-022-01066-3	CL_0000895	Cell-type-specific eQTL	0.13705	Harvested After 5 D Stimulation	CD4+ Naive T	GNL3	1	chr3:52534789-52534790	2.65425e-04	0.03561	Soskic2022NG	Soskic-2022-Nat. Genet	rs7639267
10.1038/s41588-022-01066-3	CL_0000895	Cell-type-specific eQTL	0.12728	Harvested After 5 D Stimulation	CD4+ Naive T	GNL3	1	chr3:52533601-52533602	6.01474e-04	0.03536	Soskic2022NG	Soskic-2022-Nat. Genet	rs66782572
10.1038/s41588-022-01066-3	CL_0000895	Cell-type-specific eQTL	-0.13576	Harvested After 5 D Stimulation	CD4+ Naive T	GNL3	1	chr3:52533172-52533173	1.67697e-04	0.03408	Soskic2022NG	Soskic-2022-Nat. Genet	rs28661185
10.1038/s41588-022-01066-3	CL_0000895	Cell-type-specific eQTL	0.12728	Harvested After 5 D Stimulation	CD4+ Naive T	GNL3	1	chr3:52532998-52532999	6.01474e-04	0.03536	Soskic2022NG	Soskic-2022-Nat. Genet	rs12489828
10.1038/s41588-022-01066-3	CL_0000895	Cell-type-specific eQTL	0.12728	Harvested After 5 D Stimulation	CD4+ Naive T	GNL3	1	chr3:52532898-52532899	6.01474e-04	0.03536	Soskic2022NG	Soskic-2022-Nat. Genet	rs7614981
10.1038/s41588-022-01066-3	CL_0000895	Cell-type-specific eQTL	-0.15901	Harvested After 5 D Stimulation	CD4+ Naive T	GNL3	1	chr3:52532804-52532805	1.60113e-05	0.03422	Soskic2022NG	Soskic-2022-Nat. Genet	rs12489732
10.1038/s41588-022-01066-3	CL_0000895	Cell-type-specific eQTL	0.13705	Harvested After 5 D Stimulation	CD4+ Naive T	GNL3	1	chr3:52532666-52532667	2.65425e-04	0.03561	Soskic2022NG	Soskic-2022-Nat. Genet	rs7636227
10.1038/s41588-022-01066-3	CL_0000895	Cell-type-specific eQTL	0.13705	Harvested After 5 D Stimulation	CD4+ Naive T	GNL3	1	chr3:52532049-52532050	2.65425e-04	0.03561	Soskic2022NG	Soskic-2022-Nat. Genet	rs4282054
10.1038/s41588-022-01066-3	CL_0000895	Cell-type-specific eQTL	0.13705	Harvested After 5 D Stimulation	CD4+ Naive T	GNL3	1	chr3:52531084-52531085	2.65425e-04	0.03561	Soskic2022NG	Soskic-2022-Nat. Genet	rs6778735
10.1038/s41588-022-01066-3	CL_0000895	Cell-type-specific eQTL	-0.13576	Harvested After 5 D Stimulation	CD4+ Naive T	GNL3	1	chr3:52529702-52529703	1.67697e-04	0.03408	Soskic2022NG	Soskic-2022-Nat. Genet	rs4687625
10.1038/s41588-022-01066-3	CL_0000895	Cell-type-specific eQTL	-0.13576	Harvested After 5 D Stimulation	CD4+ Naive T	GNL3	1	chr3:52529556-52529557	1.67697e-04	0.03408	Soskic2022NG	Soskic-2022-Nat. Genet	rs4687624
10.1038/s41588-022-01066-3	CL_0000895	Cell-type-specific eQTL	-0.13576	Harvested After 5 D Stimulation	CD4+ Naive T	GNL3	1	chr3:52527763-52527764	1.67697e-04	0.03408	Soskic2022NG	Soskic-2022-Nat. Genet	rs11711421
10.1038/s41588-022-01066-3	CL_0000895	Cell-type-specific eQTL	-0.13576	Harvested After 5 D Stimulation	CD4+ Naive T	GNL3	1	chr3:52526005-52526006	1.67697e-04	0.03408	Soskic2022NG	Soskic-2022-Nat. Genet	rs4475032
10.1038/s41588-022-01066-3	CL_0000895	Cell-type-specific eQTL	0.13705	Harvested After 5 D Stimulation	CD4+ Naive T	GNL3	1	chr3:52525689-52525690	2.65425e-04	0.03561	Soskic2022NG	Soskic-2022-Nat. Genet	rs11709284
10.1038/s41588-022-01066-3	CL_0000895	Cell-type-specific eQTL	-0.13576	Harvested After 5 D Stimulation	CD4+ Naive T	GNL3	1	chr3:52524888-52524889	1.67697e-04	0.03408	Soskic2022NG	Soskic-2022-Nat. Genet	rs34005367
10.1038/s41588-022-01066-3	CL_0000895	Cell-type-specific eQTL	-0.13576	Harvested After 5 D Stimulation	CD4+ Naive T	GNL3	1	chr3:52524117-52524118	1.67697e-04	0.03408	Soskic2022NG	Soskic-2022-Nat. Genet	rs13621
10.1038/s41588-022-01066-3	CL_0000895	Cell-type-specific eQTL	-0.13576	Harvested After 5 D Stimulation	CD4+ Naive T	GNL3	1	chr3:52523022-52523023	1.67697e-04	0.03408	Soskic2022NG	Soskic-2022-Nat. Genet	rs4234633
10.1038/s41588-022-01066-3	CL_0000895	Cell-type-specific eQTL	-0.13576	Harvested After 5 D Stimulation	CD4+ Naive T	GNL3	1	chr3:52522874-52522875	1.67697e-04	0.03408	Soskic2022NG	Soskic-2022-Nat. Genet	rs4434138
10.1038/s41588-022-01066-3	CL_0000895	Cell-type-specific eQTL	0.13705	Harvested After 5 D Stimulation	CD4+ Naive T	GNL3	1	chr3:52521941-52521942	2.65425e-04	0.03561	Soskic2022NG	Soskic-2022-Nat. Genet	rs9853056
10.1038/s41588-022-01066-3	CL_0000895	Cell-type-specific eQTL	0.13705	Harvested After 5 D Stimulation	CD4+ Naive T	GNL3	1	chr3:52521300-52521301	2.65425e-04	0.03561	Soskic2022NG	Soskic-2022-Nat. Genet	rs13081028
10.1038/s41588-022-01066-3	CL_0000895	Cell-type-specific eQTL	0.13705	Harvested After 5 D Stimulation	CD4+ Naive T	GNL3	1	chr3:52517268-52517269	2.65425e-04	0.03561	Soskic2022NG	Soskic-2022-Nat. Genet	rs67409736
10.1038/s41588-022-01066-3	CL_0000895	Cell-type-specific eQTL	0.13705	Harvested After 5 D Stimulation	CD4+ Naive T	GNL3	1	chr3:52517249-52517250	2.65425e-04	0.03561	Soskic2022NG	Soskic-2022-Nat. Genet	rs66824127
10.1038/s41588-022-01066-3	CL_0000895	Cell-type-specific eQTL	-0.13576	Harvested After 5 D Stimulation	CD4+ Naive T	GNL3	1	chr3:52512804-52512805	1.67697e-04	0.03408	Soskic2022NG	Soskic-2022-Nat. Genet	rs2015971
10.1038/s41588-022-01066-3	CL_0000895	Cell-type-specific eQTL	0.13608	Harvested After 5 D Stimulation	CD4+ Naive T	GNL3	1	chr3:52508903-52508904	2.14566e-04	0.03479	Soskic2022NG	Soskic-2022-Nat. Genet	rs1010554
10.1038/s41588-022-01066-3	CL_0000895	Cell-type-specific eQTL	-0.13461	Harvested After 5 D Stimulation	CD4+ Naive T	GNL3	1	chr3:52507237-52507238	1.85402e-04	0.03404	Soskic2022NG	Soskic-2022-Nat. Genet	rs11130306
10.1038/s41588-022-01066-3	CL_0000895	Cell-type-specific eQTL	-0.13461	Harvested After 5 D Stimulation	CD4+ Naive T	GNL3	1	chr3:52506757-52506758	1.85402e-04	0.03404	Soskic2022NG	Soskic-2022-Nat. Genet	rs1010553
10.1038/s41588-022-01066-3	CL_0000895	Cell-type-specific eQTL	-0.16937	Harvested After 5 D Stimulation	CD4+ Naive T	GNL3	1	chr3:52506528-52506529	3.61115e-06	0.03358	Soskic2022NG	Soskic-2022-Nat. Genet	rs1010552
10.1038/s41588-022-01066-3	CL_0000895	Cell-type-specific eQTL	-0.16937	Harvested After 5 D Stimulation	CD4+ Naive T	GNL3	1	chr3:52502498-52502499	3.61115e-06	0.03358	Soskic2022NG	Soskic-2022-Nat. Genet	rs731831
10.1038/s41588-022-01066-3	CL_0000897	Cell-type-specific eQTL	-0.15725	After Acquiring Effector Functions (5 D)	CD4 Memory	GNL3	1	chr3:52801338-52801339	5.09897e-04	0.04323	Soskic2022NG	Soskic-2022-Nat. Genet	rs736408
10.1038/s41588-022-01066-3	CL_0000897	Cell-type-specific eQTL	-0.16866	After Acquiring Effector Functions (5 D)	CD4 Memory	GNL3	1	chr3:52797685-52797686	4.21557e-04	0.04564	Soskic2022NG	Soskic-2022-Nat. Genet	rs2240919
10.1038/s41588-022-01066-3	CL_0000897	Cell-type-specific eQTL	-0.18472	After Acquiring Effector Functions (5 D)	CD4 Memory	GNL3	1	chr3:52666461-52666462	7.57082e-05	0.04403	Soskic2022NG	Soskic-2022-Nat. Genet	rs35976524
10.1038/s41588-022-01066-3	CL_0000897	Cell-type-specific eQTL	-0.18472	After Acquiring Effector Functions (5 D)	CD4 Memory	GNL3	1	chr3:52616332-52616333	7.57082e-05	0.04403	Soskic2022NG	Soskic-2022-Nat. Genet	rs10510760
10.1038/s41588-022-01066-3	CL_0000897	Cell-type-specific eQTL	-0.19073	After Acquiring Effector Functions (5 D)	CD4 Memory	GNL3	0	chr3:52582241-52582242	6.49487e-05	0.045	Soskic2022NG	Soskic-2022-Nat. Genet	rs868190462
10.1038/s41588-022-01066-3	CL_0000897	Cell-type-specific eQTL	-0.18608	After Acquiring Effector Functions (5 D)	CD4 Memory	GNL3	1	chr3:52532804-52532805	5.26018e-05	0.0433	Soskic2022NG	Soskic-2022-Nat. Genet	rs12489732
10.1038/s41588-022-01066-3	CL_0000897	Cell-type-specific eQTL	-0.18755	After Acquiring Effector Functions (5 D)	CD4 Memory	GNL3	1	chr3:52506528-52506529	4.23669e-05	0.04304	Soskic2022NG	Soskic-2022-Nat. Genet	rs1010552
10.1038/s41588-022-01066-3	CL_0000897	Cell-type-specific eQTL	-0.18585	After Acquiring Effector Functions (5 D)	CD4 Memory	GNL3	1	chr3:52502498-52502499	4.80647e-05	0.043	Soskic2022NG	Soskic-2022-Nat. Genet	rs731831
10.1038/s41588-022-01066-3	CL_0000897	Cell-type-specific eQTL	-0.09716	After The First Cell Division (40 h)	CD4 Memory	GNL3	0	chr3:52485838-52485839	1.17765e-03	0.02875	Soskic2022NG	Soskic-2022-Nat. Genet	rs17263770
10.1038/s41588-022-01066-3	CL_0000897	Cell-type-specific eQTL	-0.09716	After The First Cell Division (40 h)	CD4 Memory	GNL3	0	chr3:52460572-52460573	1.17765e-03	0.02875	Soskic2022NG	Soskic-2022-Nat. Genet	rs6776759
10.1038/s41588-022-01066-3	CL_0000897	Cell-type-specific eQTL	-0.09716	After The First Cell Division (40 h)	CD4 Memory	GNL3	0	chr3:52455611-52455612	1.17765e-03	0.02875	Soskic2022NG	Soskic-2022-Nat. Genet	rs1319202
10.1038/s41588-022-01066-3	CL_0000897	Cell-type-specific eQTL	-0.09716	After The First Cell Division (40 h)	CD4 Memory	GNL3	0	chr3:52454501-52454502	1.17765e-03	0.02875	Soskic2022NG	Soskic-2022-Nat. Genet	rs724801
10.1038/s41588-022-01066-3	CL_0000897	Cell-type-specific eQTL	-0.09716	After The First Cell Division (40 h)	CD4 Memory	GNL3	0	chr3:52449771-52449772	1.17765e-03	0.02875	Soskic2022NG	Soskic-2022-Nat. Genet	rs11130304
10.1038/s41588-022-01066-3	CL_0000897	Cell-type-specific eQTL	-0.09716	After The First Cell Division (40 h)	CD4 Memory	GNL3	0	chr3:52447390-52447391	1.17765e-03	0.02875	Soskic2022NG	Soskic-2022-Nat. Genet	rs10865971
10.1186/s13059-021-02293-3	CL_0000057	Cell-type-specific eQTL	-0.31177	TEAD2+	Fibroblast	GNL3	1	chr3:52373789-52373790	4.14900e-01	0.3824	Neavin2021GB	Neavin-2021-Genome Biol	rs13076508
10.1186/s13059-021-02293-3	CL_0000057	Cell-type-specific eQTL	0.1418	TEAD2+	Fibroblast	GNL3	0	chr3:53006439-53006440	7.45690e-01	0.43722	Neavin2021GB	Neavin-2021-Genome Biol	rs138340647
10.1186/s13059-021-02293-3	CL_0000057	Cell-type-specific eQTL	-0.56474	SIX5+	Fibroblast	GNL3	1	chr3:52373789-52373790	8.44713e-02	0.32733	Neavin2021GB	Neavin-2021-Genome Biol	rs13076508
10.1186/s13059-021-02293-3	CL_0000057	Cell-type-specific eQTL	-0.53353	SIX5+	Fibroblast	GNL3	0	chr3:53006439-53006440	1.30997e-01	0.35329	Neavin2021GB	Neavin-2021-Genome Biol	rs138340647
10.1186/s13059-021-02293-3	CL_0000057	Cell-type-specific eQTL	-0.2599	RXRB+	Fibroblast	GNL3	1	chr3:52373789-52373790	5.19685e-01	0.40367	Neavin2021GB	Neavin-2021-Genome Biol	rs13076508
10.1186/s13059-021-02293-3	CL_0000057	Cell-type-specific eQTL	0.12081	RXRB+	Fibroblast	GNL3	0	chr3:53006439-53006440	7.77540e-01	0.42762	Neavin2021GB	Neavin-2021-Genome Biol	rs138340647
10.1186/s13059-021-02293-3	CL_0000057	Cell-type-specific eQTL	-0.02464	KLF10+	Fibroblast	GNL3	1	chr3:52373789-52373790	9.47192e-01	0.37208	Neavin2021GB	Neavin-2021-Genome Biol	rs13076508
10.1186/s13059-021-02293-3	CL_0000057	Cell-type-specific eQTL	-0.04221	KLF10+	Fibroblast	GNL3	0	chr3:53006439-53006440	9.12397e-01	0.38371	Neavin2021GB	Neavin-2021-Genome Biol	rs138340647
10.1186/s13059-021-02293-3	CL_0000057	Cell-type-specific eQTL	-0.1622	HOXC6+	Fibroblast	GNL3	1	chr3:52373789-52373790	6.36435e-01	0.34315	Neavin2021GB	Neavin-2021-Genome Biol	rs13076508
10.1186/s13059-021-02293-3	CL_0000057	Cell-type-specific eQTL	1.36684	HOXC6+	Fibroblast	GNL3	0	chr3:53006439-53006440	3.74000e-05	0.33152	Neavin2021GB	Neavin-2021-Genome Biol	rs138340647
10.1186/s13059-021-02293-3	CL_0000057	Cell-type-specific eQTL	-1.17283	ATF1+	Fibroblast	GNL3	1	chr3:52373789-52373790	2.33000e-05	0.27722	Neavin2021GB	Neavin-2021-Genome Biol	rs13076508
10.1186/s13059-021-02293-3	CL_0000057	Cell-type-specific eQTL	0.73529	ATF1+	Fibroblast	GNL3	0	chr3:53006439-53006440	1.74845e-02	0.30942	Neavin2021GB	Neavin-2021-Genome Biol	rs138340647
10.1038/s41588-021-00801-6	CL_0000850	Cell-type-specific eQTL	-0.18659	Cell Proliferation On Day 52	Serotonergic-like Neurons	GNL3	0	chr3:53157147-53157148	7.06654e-04	0.05509	Jerber2021NG	Jerber-2021-Nat. Genet	rs6778939
10.1038/s41588-021-00801-6	CL_0000850	Cell-type-specific eQTL	-0.18251	Cell Proliferation On Day 52	Serotonergic-like Neurons	GNL3	0	chr3:53155654-53155655	7.25043e-04	0.054	Jerber2021NG	Jerber-2021-Nat. Genet	rs11130345
10.1038/s41588-021-00801-6	CL_0000850	Cell-type-specific eQTL	-0.18251	Cell Proliferation On Day 52	Serotonergic-like Neurons	GNL3	0	chr3:53155422-53155423	7.25043e-04	0.054	Jerber2021NG	Jerber-2021-Nat. Genet	rs2358617
10.1038/s41588-021-00801-6	CL_0000065	Cell-type-specific eQTL	-0.19579	Cell Proliferation On Day 52	Ependymal-like 1	GNL3	1	chr3:52255693-52255694	2.40298e-04	0.05331	Jerber2021NG	Jerber-2021-Nat. Genet	rs11542804
10.1038/s41588-021-00801-6	CL_0000065	Response eQTL	-0.24824	Cell Proliferation On Day 52; Treated With Rotenone	Ependymal-like 1	GNL3	1	chr3:52813585-52813586	2.09518e-04	0.06696	Jerber2021NG	Jerber-2021-Nat. Genet	rs2071044
10.1038/s41588-021-00801-6	CL_0000065	Response eQTL	-0.25027	Cell Proliferation On Day 52; Treated With Rotenone	Ependymal-like 1	GNL3	1	chr3:52811089-52811090	1.69966e-04	0.06656	Jerber2021NG	Jerber-2021-Nat. Genet	rs2535627
10.1038/s41588-021-00801-6	CL_0000065	Response eQTL	-0.32033	Cell Proliferation On Day 52; Treated With Rotenone	Ependymal-like 1	GNL3	1	chr3:52804386-52804387	9.84055e-06	0.07246	Jerber2021NG	Jerber-2021-Nat. Genet	rs4687552
10.1038/s41588-021-00801-6	CL_0000065	Response eQTL	-0.32033	Cell Proliferation On Day 52; Treated With Rotenone	Ependymal-like 1	GNL3	1	chr3:52803839-52803840	9.84055e-06	0.07246	Jerber2021NG	Jerber-2021-Nat. Genet	rs2710331
10.1038/s41588-021-00801-6	CL_0000065	Response eQTL	-0.25027	Cell Proliferation On Day 52; Treated With Rotenone	Ependymal-like 1	GNL3	1	chr3:52803777-52803778	1.69966e-04	0.06656	Jerber2021NG	Jerber-2021-Nat. Genet	rs4481150
10.1038/s41588-021-00801-6	CL_0000065	Response eQTL	-0.316	Cell Proliferation On Day 52; Treated With Rotenone	Ependymal-like 1	GNL3	1	chr3:52801338-52801339	4.90183e-06	0.06916	Jerber2021NG	Jerber-2021-Nat. Genet	rs736408
10.1038/s41588-021-00801-6	CL_0000065	Response eQTL	-0.2369	Cell Proliferation On Day 52; Treated With Rotenone	Ependymal-like 1	GNL3	1	chr3:52799789-52799790	3.26081e-04	0.06592	Jerber2021NG	Jerber-2021-Nat. Genet	rs3617
10.1038/s41588-021-00801-6	CL_0000065	Response eQTL	-0.30287	Cell Proliferation On Day 52; Treated With Rotenone	Ependymal-like 1	GNL3	1	chr3:52799203-52799204	1.07540e-05	0.06881	Jerber2021NG	Jerber-2021-Nat. Genet	rs2535629
10.1038/s41588-021-00801-6	CL_0000065	Response eQTL	-0.33323	Cell Proliferation On Day 52; Treated With Rotenone	Ependymal-like 1	GNL3	1	chr3:52797685-52797686	3.58195e-06	0.07191	Jerber2021NG	Jerber-2021-Nat. Genet	rs2240919
10.1038/s41588-021-00801-6	CL_0000065	Response eQTL	-0.32104	Cell Proliferation On Day 52; Treated With Rotenone	Ependymal-like 1	GNL3	1	chr3:52796993-52796994	7.85025e-06	0.07183	Jerber2021NG	Jerber-2021-Nat. Genet	rs2240920
10.1038/s41588-021-00801-6	CL_0000065	Response eQTL	-0.34864	Cell Proliferation On Day 52; Treated With Rotenone	Ependymal-like 1	GNL3	1	chr3:52794612-52794613	1.04355e-06	0.07139	Jerber2021NG	Jerber-2021-Nat. Genet	rs9881468
10.1038/s41588-021-00801-6	CL_0000065	Response eQTL	-0.32104	Cell Proliferation On Day 52; Treated With Rotenone	Ependymal-like 1	GNL3	1	chr3:52793899-52793900	7.85025e-06	0.07183	Jerber2021NG	Jerber-2021-Nat. Genet	rs2239699
10.1038/s41588-021-00801-6	CL_0000065	Response eQTL	-0.32104	Cell Proliferation On Day 52; Treated With Rotenone	Ependymal-like 1	GNL3	1	chr3:52793550-52793551	7.85025e-06	0.07183	Jerber2021NG	Jerber-2021-Nat. Genet	rs4687654
10.1038/s41588-021-00801-6	CL_0000065	Response eQTL	-0.32281	Cell Proliferation On Day 52; Treated With Rotenone	Ependymal-like 1	GNL3	1	chr3:52792830-52792831	5.33399e-06	0.07093	Jerber2021NG	Jerber-2021-Nat. Genet	rs2071508
10.1038/s41588-021-00801-6	CL_0000065	Response eQTL	-0.32281	Cell Proliferation On Day 52; Treated With Rotenone	Ependymal-like 1	GNL3	1	chr3:52792691-52792692	5.33399e-06	0.07093	Jerber2021NG	Jerber-2021-Nat. Genet	rs2071507
10.1038/s41588-021-00801-6	CL_0000065	Response eQTL	-0.33012	Cell Proliferation On Day 52; Treated With Rotenone	Ependymal-like 1	GNL3	1	chr3:52792604-52792605	1.42456e-06	0.06847	Jerber2021NG	Jerber-2021-Nat. Genet	rs746694
10.1038/s41588-021-00801-6	CL_0000065	Response eQTL	-0.33012	Cell Proliferation On Day 52; Treated With Rotenone	Ependymal-like 1	GNL3	1	chr3:52792260-52792261	1.42456e-06	0.06847	Jerber2021NG	Jerber-2021-Nat. Genet	rs2071506
10.1038/s41588-021-00801-6	CL_0000065	Response eQTL	-0.33012	Cell Proliferation On Day 52; Treated With Rotenone	Ependymal-like 1	GNL3	1	chr3:52791569-52791570	1.42456e-06	0.06847	Jerber2021NG	Jerber-2021-Nat. Genet	rs9324
10.1038/s41588-021-00801-6	CL_0000065	Response eQTL	-0.33012	Cell Proliferation On Day 52; Treated With Rotenone	Ependymal-like 1	GNL3	1	chr3:52791512-52791513	1.42456e-06	0.06847	Jerber2021NG	Jerber-2021-Nat. Genet	rs1075653
10.1038/s41588-021-00801-6	CL_0000065	Response eQTL	-0.32281	Cell Proliferation On Day 52; Treated With Rotenone	Ependymal-like 1	GNL3	1	chr3:52791446-52791447	5.33399e-06	0.07093	Jerber2021NG	Jerber-2021-Nat. Genet	rs1076425
10.1038/s41588-021-00801-6	CL_0000065	Response eQTL	-0.32281	Cell Proliferation On Day 52; Treated With Rotenone	Ependymal-like 1	GNL3	1	chr3:52790594-52790595	5.33399e-06	0.07093	Jerber2021NG	Jerber-2021-Nat. Genet	rs6778329
10.1038/s41588-021-00801-6	CL_0000065	Response eQTL	-0.32281	Cell Proliferation On Day 52; Treated With Rotenone	Ependymal-like 1	GNL3	1	chr3:52790079-52790080	5.33399e-06	0.07093	Jerber2021NG	Jerber-2021-Nat. Genet	rs2270197
10.1038/s41588-021-00801-6	CL_0000065	Response eQTL	-0.32281	Cell Proliferation On Day 52; Treated With Rotenone	Ependymal-like 1	GNL3	1	chr3:52789432-52789433	5.33399e-06	0.07093	Jerber2021NG	Jerber-2021-Nat. Genet	rs4687551
10.1038/s41588-021-00801-6	CL_0000065	Response eQTL	-0.32281	Cell Proliferation On Day 52; Treated With Rotenone	Ependymal-like 1	GNL3	1	chr3:52789414-52789415	5.33399e-06	0.07093	Jerber2021NG	Jerber-2021-Nat. Genet	rs4687550
10.1038/s41588-021-00801-6	CL_0000065	Response eQTL	-0.34357	Cell Proliferation On Day 52; Treated With Rotenone	Ependymal-like 1	GNL3	1	chr3:52789110-52789111	9.79607e-07	0.07018	Jerber2021NG	Jerber-2021-Nat. Genet	rs2239549
10.1038/s41588-021-00801-6	CL_0000065	Response eQTL	-0.34357	Cell Proliferation On Day 52; Treated With Rotenone	Ependymal-like 1	GNL3	1	chr3:52788905-52788906	9.79607e-07	0.07018	Jerber2021NG	Jerber-2021-Nat. Genet	rs2300149
10.1038/s41588-021-00801-6	CL_0000065	Response eQTL	-0.34357	Cell Proliferation On Day 52; Treated With Rotenone	Ependymal-like 1	GNL3	1	chr3:52788840-52788841	9.79607e-07	0.07018	Jerber2021NG	Jerber-2021-Nat. Genet	rs2284350
10.1038/s41588-021-00801-6	CL_0000065	Response eQTL	-0.34357	Cell Proliferation On Day 52; Treated With Rotenone	Ependymal-like 1	GNL3	1	chr3:52788773-52788774	9.79607e-07	0.07018	Jerber2021NG	Jerber-2021-Nat. Genet	rs2284351
10.1038/s41588-021-00801-6	CL_0000065	Response eQTL	-0.34357	Cell Proliferation On Day 52; Treated With Rotenone	Ependymal-like 1	GNL3	1	chr3:52788493-52788494	9.79607e-07	0.07018	Jerber2021NG	Jerber-2021-Nat. Genet	rs2239550
10.1038/s41588-021-00801-6	CL_0000065	Response eQTL	-0.3475	Cell Proliferation On Day 52; Treated With Rotenone	Ependymal-like 1	GNL3	1	chr3:52787161-52787162	3.88418e-07	0.06848	Jerber2021NG	Jerber-2021-Nat. Genet	rs2286798
10.1038/s41588-021-00801-6	CL_0000065	Response eQTL	-0.33564	Cell Proliferation On Day 52; Treated With Rotenone	Ependymal-like 1	GNL3	1	chr3:52786995-52786996	7.55750e-07	0.06786	Jerber2021NG	Jerber-2021-Nat. Genet	rs1042779
10.1038/s41588-021-00801-6	CL_0000065	Response eQTL	-0.34057	Cell Proliferation On Day 52; Treated With Rotenone	Ependymal-like 1	GNL3	1	chr3:52786965-52786966	1.55832e-06	0.0709	Jerber2021NG	Jerber-2021-Nat. Genet	rs678
10.1038/s41588-021-00801-6	CL_0000065	Response eQTL	-0.34566	Cell Proliferation On Day 52; Treated With Rotenone	Ependymal-like 1	GNL3	1	chr3:52785311-52785312	2.66079e-07	0.06717	Jerber2021NG	Jerber-2021-Nat. Genet	rs2268023
10.1038/s41588-021-00801-6	CL_0000065	Response eQTL	-0.35665	Cell Proliferation On Day 52; Treated With Rotenone	Ependymal-like 1	GNL3	1	chr3:52784563-52784564	4.67490e-07	0.07078	Jerber2021NG	Jerber-2021-Nat. Genet	rs2239551
10.1038/s41588-021-00801-6	CL_0000065	Response eQTL	-0.35369	Cell Proliferation On Day 52; Treated With Rotenone	Ependymal-like 1	GNL3	1	chr3:52783762-52783763	7.56581e-07	0.07151	Jerber2021NG	Jerber-2021-Nat. Genet	rs3774355
10.1038/s41588-021-00801-6	CL_0000065	Response eQTL	-0.35369	Cell Proliferation On Day 52; Treated With Rotenone	Ependymal-like 1	GNL3	1	chr3:52783659-52783660	7.56581e-07	0.07151	Jerber2021NG	Jerber-2021-Nat. Genet	rs3774354
10.1038/s41588-021-00801-6	CL_0000065	Response eQTL	-0.27523	Cell Proliferation On Day 52; Treated With Rotenone	Ependymal-like 1	GNL3	1	chr3:52781889-52781890	1.93220e-05	0.06442	Jerber2021NG	Jerber-2021-Nat. Genet	rs2710323
10.1038/s41588-021-00801-6	CL_0000065	Response eQTL	-0.27644	Cell Proliferation On Day 52; Treated With Rotenone	Ependymal-like 1	GNL3	0	chr3:52780240-52780241	3.92597e-05	0.06723	Jerber2021NG	Jerber-2021-Nat. Genet	rs2302417
10.1038/s41588-021-00801-6	CL_0000065	Response eQTL	-0.32315	Cell Proliferation On Day 52; Treated With Rotenone	Ependymal-like 1	GNL3	1	chr3:52777156-52777157	1.96735e-06	0.06794	Jerber2021NG	Jerber-2021-Nat. Genet	rs6792369
10.1038/s41588-021-00801-6	CL_0000065	Response eQTL	-0.33687	Cell Proliferation On Day 52; Treated With Rotenone	Ependymal-like 1	GNL3	1	chr3:52776917-52776918	4.00840e-07	0.06646	Jerber2021NG	Jerber-2021-Nat. Genet	rs2098167
10.1038/s41588-021-00801-6	CL_0000065	Response eQTL	-0.35214	Cell Proliferation On Day 52; Treated With Rotenone	Ependymal-like 1	GNL3	1	chr3:52775509-52775510	1.49323e-07	0.06703	Jerber2021NG	Jerber-2021-Nat. Genet	rs2019065
10.1038/s41588-021-00801-6	CL_0000065	Response eQTL	-0.31012	Cell Proliferation On Day 52; Treated With Rotenone	Ependymal-like 1	GNL3	1	chr3:52775177-52775178	7.85809e-06	0.06939	Jerber2021NG	Jerber-2021-Nat. Genet	rs3755799
10.1038/s41588-021-00801-6	CL_0000065	Response eQTL	-0.34356	Cell Proliferation On Day 52; Treated With Rotenone	Ependymal-like 1	GNL3	1	chr3:52774325-52774326	4.39737e-07	0.06802	Jerber2021NG	Jerber-2021-Nat. Genet	rs1014969
10.1038/s41588-021-00801-6	CL_0000065	Response eQTL	-0.38179	Cell Proliferation On Day 52; Treated With Rotenone	Ependymal-like 1	GNL3	1	chr3:52773720-52773721	2.15938e-08	0.06819	Jerber2021NG	Jerber-2021-Nat. Genet	rs11717836
10.1038/s41588-021-00801-6	CL_0000065	Response eQTL	-0.33793	Cell Proliferation On Day 52; Treated With Rotenone	Ependymal-like 1	GNL3	1	chr3:52771077-52771078	4.63782e-07	0.06704	Jerber2021NG	Jerber-2021-Nat. Genet	rs998909
10.1038/s41588-021-00801-6	CL_0000065	Response eQTL	-0.38179	Cell Proliferation On Day 52; Treated With Rotenone	Ependymal-like 1	GNL3	1	chr3:52769189-52769190	2.15938e-08	0.06819	Jerber2021NG	Jerber-2021-Nat. Genet	rs2268024
10.1038/s41588-021-00801-6	CL_0000065	Response eQTL	-0.36853	Cell Proliferation On Day 52; Treated With Rotenone	Ependymal-like 1	GNL3	1	chr3:52768386-52768387	4.86564e-08	0.06754	Jerber2021NG	Jerber-2021-Nat. Genet	rs2230534
10.1038/s41588-021-00801-6	CL_0000065	Response eQTL	-0.38179	Cell Proliferation On Day 52; Treated With Rotenone	Ependymal-like 1	GNL3	1	chr3:52766715-52766716	2.15938e-08	0.06819	Jerber2021NG	Jerber-2021-Nat. Genet	rs4687650
10.1038/s41588-021-00801-6	CL_0000065	Response eQTL	-0.36853	Cell Proliferation On Day 52; Treated With Rotenone	Ependymal-like 1	GNL3	1	chr3:52766268-52766269	4.86564e-08	0.06754	Jerber2021NG	Jerber-2021-Nat. Genet	rs2230535
10.1038/s41588-021-00801-6	CL_0000065	Response eQTL	-0.38179	Cell Proliferation On Day 52; Treated With Rotenone	Ependymal-like 1	GNL3	1	chr3:52763618-52763619	2.15938e-08	0.06819	Jerber2021NG	Jerber-2021-Nat. Genet	rs1029871
10.1038/s41588-021-00801-6	CL_0000065	Response eQTL	-0.38179	Cell Proliferation On Day 52; Treated With Rotenone	Ependymal-like 1	GNL3	1	chr3:52761208-52761209	2.15938e-08	0.06819	Jerber2021NG	Jerber-2021-Nat. Genet	rs2268025
10.1038/s41588-021-00801-6	CL_0000065	Response eQTL	-0.33838	Cell Proliferation On Day 52; Treated With Rotenone	Ependymal-like 1	GNL3	1	chr3:52760351-52760352	3.19557e-07	0.0662	Jerber2021NG	Jerber-2021-Nat. Genet	rs4687648
10.1038/s41588-021-00801-6	CL_0000065	Response eQTL	-0.33793	Cell Proliferation On Day 52; Treated With Rotenone	Ependymal-like 1	GNL3	1	chr3:52759586-52759587	4.63782e-07	0.06704	Jerber2021NG	Jerber-2021-Nat. Genet	rs12497998
10.1038/s41588-021-00801-6	CL_0000065	Response eQTL	-0.38179	Cell Proliferation On Day 52; Treated With Rotenone	Ependymal-like 1	GNL3	1	chr3:52759223-52759224	2.15938e-08	0.06819	Jerber2021NG	Jerber-2021-Nat. Genet	rs11130327
10.1038/s41588-021-00801-6	CL_0000065	Response eQTL	-0.36853	Cell Proliferation On Day 52; Treated With Rotenone	Ependymal-like 1	GNL3	1	chr3:52756197-52756198	4.86564e-08	0.06754	Jerber2021NG	Jerber-2021-Nat. Genet	rs13061423
10.1038/s41588-021-00801-6	CL_0000065	Response eQTL	-0.29716	Cell Proliferation On Day 52; Treated With Rotenone	Ependymal-like 1	GNL3	1	chr3:52754943-52754944	8.09401e-06	0.06659	Jerber2021NG	Jerber-2021-Nat. Genet	rs6414570
10.1038/s41588-021-00801-6	CL_0000065	Response eQTL	-0.36853	Cell Proliferation On Day 52; Treated With Rotenone	Ependymal-like 1	GNL3	1	chr3:52753587-52753588	4.86564e-08	0.06754	Jerber2021NG	Jerber-2021-Nat. Genet	rs2336545
10.1038/s41588-021-00801-6	CL_0000065	Response eQTL	-0.38179	Cell Proliferation On Day 52; Treated With Rotenone	Ependymal-like 1	GNL3	1	chr3:52753226-52753227	2.15938e-08	0.06819	Jerber2021NG	Jerber-2021-Nat. Genet	rs13095332
10.1038/s41588-021-00801-6	CL_0000065	Response eQTL	-0.34137	Cell Proliferation On Day 52; Treated With Rotenone	Ependymal-like 1	GNL3	0	chr3:52752897-52752898	2.80525e-07	0.06646	Jerber2021NG	Jerber-2021-Nat. Genet	rs13094778
10.1038/s41588-021-00801-6	CL_0000065	Response eQTL	-0.27412	Cell Proliferation On Day 52; Treated With Rotenone	Ependymal-like 1	GNL3	1	chr3:52751222-52751223	3.96469e-05	0.0667	Jerber2021NG	Jerber-2021-Nat. Genet	rs7646741
10.1038/s41588-021-00801-6	CL_0000065	Response eQTL	-0.36853	Cell Proliferation On Day 52; Treated With Rotenone	Ependymal-like 1	GNL3	1	chr3:52751152-52751153	4.86564e-08	0.06754	Jerber2021NG	Jerber-2021-Nat. Genet	rs13082960
10.1038/s41588-021-00801-6	CL_0000065	Response eQTL	-0.33793	Cell Proliferation On Day 52; Treated With Rotenone	Ependymal-like 1	GNL3	1	chr3:52750400-52750401	4.63782e-07	0.06704	Jerber2021NG	Jerber-2021-Nat. Genet	rs6787154
10.1038/s41588-021-00801-6	CL_0000065	Response eQTL	-0.36853	Cell Proliferation On Day 52; Treated With Rotenone	Ependymal-like 1	GNL3	1	chr3:52748823-52748824	4.86564e-08	0.06754	Jerber2021NG	Jerber-2021-Nat. Genet	rs62255396
10.1038/s41588-021-00801-6	CL_0000065	Response eQTL	-0.38179	Cell Proliferation On Day 52; Treated With Rotenone	Ependymal-like 1	GNL3	1	chr3:52748258-52748259	2.15938e-08	0.06819	Jerber2021NG	Jerber-2021-Nat. Genet	rs13087772
10.1038/s41588-021-00801-6	CL_0000065	Response eQTL	-0.38179	Cell Proliferation On Day 52; Treated With Rotenone	Ependymal-like 1	GNL3	1	chr3:52747523-52747524	2.15938e-08	0.06819	Jerber2021NG	Jerber-2021-Nat. Genet	rs13082208
10.1038/s41588-021-00801-6	CL_0000065	Response eQTL	-0.33793	Cell Proliferation On Day 52; Treated With Rotenone	Ependymal-like 1	GNL3	1	chr3:52746493-52746494	4.63782e-07	0.06704	Jerber2021NG	Jerber-2021-Nat. Genet	rs2072390
10.1038/s41588-021-00801-6	CL_0000065	Response eQTL	-0.33793	Cell Proliferation On Day 52; Treated With Rotenone	Ependymal-like 1	GNL3	1	chr3:52745785-52745786	4.63782e-07	0.06704	Jerber2021NG	Jerber-2021-Nat. Genet	rs13074853
10.1038/s41588-021-00801-6	CL_0000065	Response eQTL	-0.32958	Cell Proliferation On Day 52; Treated With Rotenone	Ependymal-like 1	GNL3	1	chr3:52745575-52745576	9.79961e-07	0.06732	Jerber2021NG	Jerber-2021-Nat. Genet	rs112860674
10.1038/s41588-021-00801-6	CL_0000065	Response eQTL	-0.36853	Cell Proliferation On Day 52; Treated With Rotenone	Ependymal-like 1	GNL3	1	chr3:52744331-52744332	4.86564e-08	0.06754	Jerber2021NG	Jerber-2021-Nat. Genet	rs2268026
10.1038/s41588-021-00801-6	CL_0000065	Response eQTL	-0.38179	Cell Proliferation On Day 52; Treated With Rotenone	Ependymal-like 1	GNL3	1	chr3:52744035-52744036	2.15938e-08	0.06819	Jerber2021NG	Jerber-2021-Nat. Genet	rs2286800
10.1038/s41588-021-00801-6	CL_0000065	Response eQTL	-0.33793	Cell Proliferation On Day 52; Treated With Rotenone	Ependymal-like 1	GNL3	1	chr3:52742892-52742893	4.63782e-07	0.06704	Jerber2021NG	Jerber-2021-Nat. Genet	rs7638162
10.1038/s41588-021-00801-6	CL_0000065	Response eQTL	-0.33793	Cell Proliferation On Day 52; Treated With Rotenone	Ependymal-like 1	GNL3	1	chr3:52740514-52740515	4.63782e-07	0.06704	Jerber2021NG	Jerber-2021-Nat. Genet	rs2159644
10.1038/s41588-021-00801-6	CL_0000065	Response eQTL	-0.33874	Cell Proliferation On Day 52; Treated With Rotenone	Ependymal-like 1	GNL3	1	chr3:52737904-52737905	1.12759e-06	0.06958	Jerber2021NG	Jerber-2021-Nat. Genet	rs11130326
10.1038/s41588-021-00801-6	CL_0000065	Response eQTL	-0.33793	Cell Proliferation On Day 52; Treated With Rotenone	Ependymal-like 1	GNL3	1	chr3:52737452-52737453	4.63782e-07	0.06704	Jerber2021NG	Jerber-2021-Nat. Genet	rs6445535
10.1038/s41588-021-00801-6	CL_0000065	Response eQTL	-0.36853	Cell Proliferation On Day 52; Treated With Rotenone	Ependymal-like 1	GNL3	1	chr3:52736968-52736969	4.86564e-08	0.06754	Jerber2021NG	Jerber-2021-Nat. Genet	rs11130325
10.1038/s41588-021-00801-6	CL_0000065	Response eQTL	-0.27412	Cell Proliferation On Day 52; Treated With Rotenone	Ependymal-like 1	GNL3	1	chr3:52736294-52736295	3.96469e-05	0.0667	Jerber2021NG	Jerber-2021-Nat. Genet	rs11130324
10.1038/s41588-021-00801-6	CL_0000065	Response eQTL	-0.36853	Cell Proliferation On Day 52; Treated With Rotenone	Ependymal-like 1	GNL3	1	chr3:52736261-52736262	4.86564e-08	0.06754	Jerber2021NG	Jerber-2021-Nat. Genet	rs11130323
10.1038/s41588-021-00801-6	CL_0000065	Response eQTL	-0.33793	Cell Proliferation On Day 52; Treated With Rotenone	Ependymal-like 1	GNL3	1	chr3:52733411-52733412	4.63782e-07	0.06704	Jerber2021NG	Jerber-2021-Nat. Genet	rs767418
10.1038/s41588-021-00801-6	CL_0000065	Response eQTL	-0.38179	Cell Proliferation On Day 52; Treated With Rotenone	Ependymal-like 1	GNL3	1	chr3:52732590-52732591	2.15938e-08	0.06819	Jerber2021NG	Jerber-2021-Nat. Genet	rs2268027
10.1038/s41588-021-00801-6	CL_0000065	Response eQTL	-0.33793	Cell Proliferation On Day 52; Treated With Rotenone	Ependymal-like 1	GNL3	1	chr3:52732106-52732107	4.63782e-07	0.06704	Jerber2021NG	Jerber-2021-Nat. Genet	rs34739010
10.1038/s41588-021-00801-6	CL_0000065	Response eQTL	-0.33793	Cell Proliferation On Day 52; Treated With Rotenone	Ependymal-like 1	GNL3	1	chr3:52731866-52731867	4.63782e-07	0.06704	Jerber2021NG	Jerber-2021-Nat. Genet	rs11714030
10.1038/s41588-021-00801-6	CL_0000065	Response eQTL	-0.33793	Cell Proliferation On Day 52; Treated With Rotenone	Ependymal-like 1	GNL3	1	chr3:52731630-52731631	4.63782e-07	0.06704	Jerber2021NG	Jerber-2021-Nat. Genet	rs2079929
10.1038/s41588-021-00801-6	CL_0000065	Response eQTL	-0.38179	Cell Proliferation On Day 52; Treated With Rotenone	Ependymal-like 1	GNL3	1	chr3:52730608-52730609	2.15938e-08	0.06819	Jerber2021NG	Jerber-2021-Nat. Genet	rs10780035
10.1038/s41588-021-00801-6	CL_0000065	Response eQTL	-0.38179	Cell Proliferation On Day 52; Treated With Rotenone	Ependymal-like 1	GNL3	1	chr3:52729938-52729939	2.15938e-08	0.06819	Jerber2021NG	Jerber-2021-Nat. Genet	rs4687549
10.1038/s41588-021-00801-6	CL_0000065	Response eQTL	-0.36853	Cell Proliferation On Day 52; Treated With Rotenone	Ependymal-like 1	GNL3	1	chr3:52729147-52729148	4.86564e-08	0.06754	Jerber2021NG	Jerber-2021-Nat. Genet	rs34291015
10.1038/s41588-021-00801-6	CL_0000065	Response eQTL	-0.33793	Cell Proliferation On Day 52; Treated With Rotenone	Ependymal-like 1	GNL3	1	chr3:52728984-52728985	4.63782e-07	0.06704	Jerber2021NG	Jerber-2021-Nat. Genet	rs7653028
10.1038/s41588-021-00801-6	CL_0000065	Response eQTL	-0.38179	Cell Proliferation On Day 52; Treated With Rotenone	Ependymal-like 1	GNL3	1	chr3:52728976-52728977	2.15938e-08	0.06819	Jerber2021NG	Jerber-2021-Nat. Genet	rs13086623
10.1038/s41588-021-00801-6	CL_0000065	Response eQTL	-0.34828	Cell Proliferation On Day 52; Treated With Rotenone	Ependymal-like 1	GNL3	1	chr3:52728682-52728683	2.49629e-07	0.06752	Jerber2021NG	Jerber-2021-Nat. Genet	rs11130321
10.1038/s41588-021-00801-6	CL_0000065	Response eQTL	-0.36853	Cell Proliferation On Day 52; Treated With Rotenone	Ependymal-like 1	GNL3	1	chr3:52725153-52725154	4.86564e-08	0.06754	Jerber2021NG	Jerber-2021-Nat. Genet	rs34610878
10.1038/s41588-021-00801-6	CL_0000065	Response eQTL	-0.36853	Cell Proliferation On Day 52; Treated With Rotenone	Ependymal-like 1	GNL3	1	chr3:52724926-52724927	4.86564e-08	0.06754	Jerber2021NG	Jerber-2021-Nat. Genet	rs11714088
10.1038/s41588-021-00801-6	CL_0000065	Response eQTL	-0.36853	Cell Proliferation On Day 52; Treated With Rotenone	Ependymal-like 1	GNL3	0	chr3:52721576-52721577	4.86564e-08	0.06754	Jerber2021NG	Jerber-2021-Nat. Genet	rs11130319
10.1038/s41588-021-00801-6	CL_0000065	Response eQTL	-0.31312	Cell Proliferation On Day 52; Treated With Rotenone	Ependymal-like 1	GNL3	1	chr3:52719516-52719517	2.84333e-06	0.06688	Jerber2021NG	Jerber-2021-Nat. Genet	rs34918356
10.1038/s41588-021-00801-6	CL_0000065	Response eQTL	-0.27412	Cell Proliferation On Day 52; Treated With Rotenone	Ependymal-like 1	GNL3	1	chr3:52718943-52718944	3.96469e-05	0.0667	Jerber2021NG	Jerber-2021-Nat. Genet	rs35212380
10.1038/s41588-021-00801-6	CL_0000065	Response eQTL	-0.33793	Cell Proliferation On Day 52; Treated With Rotenone	Ependymal-like 1	GNL3	1	chr3:52718059-52718060	4.63782e-07	0.06704	Jerber2021NG	Jerber-2021-Nat. Genet	rs2109634
10.1038/s41588-021-00801-6	CL_0000065	Response eQTL	-0.33793	Cell Proliferation On Day 52; Treated With Rotenone	Ependymal-like 1	GNL3	1	chr3:52717518-52717519	4.63782e-07	0.06704	Jerber2021NG	Jerber-2021-Nat. Genet	rs7624716
10.1038/s41588-021-00801-6	CL_0000065	Response eQTL	-0.33793	Cell Proliferation On Day 52; Treated With Rotenone	Ependymal-like 1	GNL3	1	chr3:52715318-52715319	4.63782e-07	0.06704	Jerber2021NG	Jerber-2021-Nat. Genet	rs35526119
10.1038/s41588-021-00801-6	CL_0000065	Response eQTL	-0.33793	Cell Proliferation On Day 52; Treated With Rotenone	Ependymal-like 1	GNL3	1	chr3:52714841-52714842	4.63782e-07	0.06704	Jerber2021NG	Jerber-2021-Nat. Genet	rs11716747
10.1038/s41588-021-00801-6	CL_0000065	Response eQTL	-0.38179	Cell Proliferation On Day 52; Treated With Rotenone	Ependymal-like 1	GNL3	1	chr3:52714255-52714256	2.15938e-08	0.06819	Jerber2021NG	Jerber-2021-Nat. Genet	rs2878726
10.1038/s41588-021-00801-6	CL_0000065	Response eQTL	-0.33793	Cell Proliferation On Day 52; Treated With Rotenone	Ependymal-like 1	GNL3	1	chr3:52714042-52714043	4.63782e-07	0.06704	Jerber2021NG	Jerber-2021-Nat. Genet	rs1468638
10.1038/s41588-021-00801-6	CL_0000065	Response eQTL	-0.35277	Cell Proliferation On Day 52; Treated With Rotenone	Ependymal-like 1	GNL3	1	chr3:52713726-52713727	4.78852e-07	0.07007	Jerber2021NG	Jerber-2021-Nat. Genet	rs7620039
10.1038/s41588-021-00801-6	CL_0000065	Response eQTL	-0.36853	Cell Proliferation On Day 52; Treated With Rotenone	Ependymal-like 1	GNL3	1	chr3:52713305-52713306	4.86564e-08	0.06754	Jerber2021NG	Jerber-2021-Nat. Genet	rs62255371
10.1038/s41588-021-00801-6	CL_0000065	Response eQTL	-0.33793	Cell Proliferation On Day 52; Treated With Rotenone	Ependymal-like 1	GNL3	1	chr3:52712525-52712526	4.63782e-07	0.06704	Jerber2021NG	Jerber-2021-Nat. Genet	rs4687644
10.1038/s41588-021-00801-6	CL_0000065	Response eQTL	0.2505	Cell Proliferation On Day 52; Treated With Rotenone	Ependymal-like 1	GNL3	1	chr3:52711071-52711072	1.76295e-04	0.06679	Jerber2021NG	Jerber-2021-Nat. Genet	rs11235
10.1038/s41588-021-00801-6	CL_0000065	Response eQTL	-0.33793	Cell Proliferation On Day 52; Treated With Rotenone	Ependymal-like 1	GNL3	1	chr3:52710444-52710445	4.63782e-07	0.06704	Jerber2021NG	Jerber-2021-Nat. Genet	rs13079063
10.1038/s41588-021-00801-6	CL_0000065	Response eQTL	-0.33793	Cell Proliferation On Day 52; Treated With Rotenone	Ependymal-like 1	GNL3	1	chr3:52709368-52709369	4.63782e-07	0.06704	Jerber2021NG	Jerber-2021-Nat. Genet	rs6445534
10.1038/s41588-021-00801-6	CL_0000065	Response eQTL	-0.33874	Cell Proliferation On Day 52; Treated With Rotenone	Ependymal-like 1	GNL3	1	chr3:52708521-52708522	1.12759e-06	0.06958	Jerber2021NG	Jerber-2021-Nat. Genet	rs12486554
10.1038/s41588-021-00801-6	CL_0000065	Response eQTL	-0.36853	Cell Proliferation On Day 52; Treated With Rotenone	Ependymal-like 1	GNL3	1	chr3:52708397-52708398	4.86564e-08	0.06754	Jerber2021NG	Jerber-2021-Nat. Genet	rs34017441
10.1038/s41588-021-00801-6	CL_0000065	Response eQTL	-0.33793	Cell Proliferation On Day 52; Treated With Rotenone	Ependymal-like 1	GNL3	1	chr3:52707144-52707145	4.63782e-07	0.06704	Jerber2021NG	Jerber-2021-Nat. Genet	rs3755798
10.1038/s41588-021-00801-6	CL_0000065	Response eQTL	-0.33793	Cell Proliferation On Day 52; Treated With Rotenone	Ependymal-like 1	GNL3	1	chr3:52706166-52706167	4.63782e-07	0.06704	Jerber2021NG	Jerber-2021-Nat. Genet	rs6617
10.1038/s41588-021-00801-6	CL_0000065	Response eQTL	-0.38179	Cell Proliferation On Day 52; Treated With Rotenone	Ependymal-like 1	GNL3	1	chr3:52705504-52705505	2.15938e-08	0.06819	Jerber2021NG	Jerber-2021-Nat. Genet	rs8906
10.1038/s41588-021-00801-6	CL_0000065	Response eQTL	-0.33793	Cell Proliferation On Day 52; Treated With Rotenone	Ependymal-like 1	GNL3	1	chr3:52704149-52704150	4.63782e-07	0.06704	Jerber2021NG	Jerber-2021-Nat. Genet	rs12635140
10.1038/s41588-021-00801-6	CL_0000065	Response eQTL	-0.38179	Cell Proliferation On Day 52; Treated With Rotenone	Ependymal-like 1	GNL3	1	chr3:52700938-52700939	2.15938e-08	0.06819	Jerber2021NG	Jerber-2021-Nat. Genet	rs11130318
10.1038/s41588-021-00801-6	CL_0000065	Response eQTL	-0.27412	Cell Proliferation On Day 52; Treated With Rotenone	Ependymal-like 1	GNL3	1	chr3:52698413-52698414	3.96469e-05	0.0667	Jerber2021NG	Jerber-2021-Nat. Genet	rs13081155
10.1038/s41588-021-00801-6	CL_0000065	Response eQTL	-0.33793	Cell Proliferation On Day 52; Treated With Rotenone	Ependymal-like 1	GNL3	1	chr3:52697582-52697583	4.63782e-07	0.06704	Jerber2021NG	Jerber-2021-Nat. Genet	rs3733041
10.1038/s41588-021-00801-6	CL_0000065	Response eQTL	-0.36853	Cell Proliferation On Day 52; Treated With Rotenone	Ependymal-like 1	GNL3	1	chr3:52697467-52697468	4.86564e-08	0.06754	Jerber2021NG	Jerber-2021-Nat. Genet	rs11130317
10.1038/s41588-021-00801-6	CL_0000065	Response eQTL	-0.33793	Cell Proliferation On Day 52; Treated With Rotenone	Ependymal-like 1	GNL3	1	chr3:52697253-52697254	4.63782e-07	0.06704	Jerber2021NG	Jerber-2021-Nat. Genet	rs2164885
10.1038/s41588-021-00801-6	CL_0000065	Response eQTL	-0.38179	Cell Proliferation On Day 52; Treated With Rotenone	Ependymal-like 1	GNL3	1	chr3:52694788-52694789	2.15938e-08	0.06819	Jerber2021NG	Jerber-2021-Nat. Genet	rs6976
10.1038/s41588-021-00801-6	CL_0000065	Response eQTL	-0.33793	Cell Proliferation On Day 52; Treated With Rotenone	Ependymal-like 1	GNL3	1	chr3:52693241-52693242	4.63782e-07	0.06704	Jerber2021NG	Jerber-2021-Nat. Genet	rs2289247
10.1038/s41588-021-00801-6	CL_0000065	Response eQTL	-0.38179	Cell Proliferation On Day 52; Treated With Rotenone	Ependymal-like 1	GNL3	1	chr3:52692679-52692680	2.15938e-08	0.06819	Jerber2021NG	Jerber-2021-Nat. Genet	rs6762813
10.1038/s41588-021-00801-6	CL_0000065	Response eQTL	-0.38179	Cell Proliferation On Day 52; Treated With Rotenone	Ependymal-like 1	GNL3	1	chr3:52691945-52691946	2.15938e-08	0.06819	Jerber2021NG	Jerber-2021-Nat. Genet	rs13076193
10.1038/s41588-021-00801-6	CL_0000065	Response eQTL	-0.33793	Cell Proliferation On Day 52; Treated With Rotenone	Ependymal-like 1	GNL3	1	chr3:52691755-52691756	4.63782e-07	0.06704	Jerber2021NG	Jerber-2021-Nat. Genet	rs35315313
10.1038/s41588-021-00801-6	CL_0000065	Response eQTL	-0.27412	Cell Proliferation On Day 52; Treated With Rotenone	Ependymal-like 1	GNL3	1	chr3:52688319-52688320	3.96469e-05	0.0667	Jerber2021NG	Jerber-2021-Nat. Genet	rs3774349
10.1038/s41588-021-00801-6	CL_0000065	Response eQTL	-0.38179	Cell Proliferation On Day 52; Treated With Rotenone	Ependymal-like 1	GNL3	1	chr3:52687289-52687290	2.15938e-08	0.06819	Jerber2021NG	Jerber-2021-Nat. Genet	rs11177
10.1038/s41588-021-00801-6	CL_0000065	Response eQTL	-0.27412	Cell Proliferation On Day 52; Treated With Rotenone	Ependymal-like 1	GNL3	1	chr3:52686064-52686065	3.96469e-05	0.0667	Jerber2021NG	Jerber-2021-Nat. Genet	rs1108842
10.1038/s41588-021-00801-6	CL_0000065	Response eQTL	0.24828	Cell Proliferation On Day 52; Treated With Rotenone	Ependymal-like 1	GNL3	1	chr3:52685800-52685801	2.00939e-04	0.06678	Jerber2021NG	Jerber-2021-Nat. Genet	rs10933
10.1038/s41588-021-00801-6	CL_0000065	Response eQTL	-0.33793	Cell Proliferation On Day 52; Treated With Rotenone	Ependymal-like 1	GNL3	1	chr3:52685382-52685383	4.63782e-07	0.06704	Jerber2021NG	Jerber-2021-Nat. Genet	rs1866268
10.1038/s41588-021-00801-6	CL_0000065	Response eQTL	-0.33793	Cell Proliferation On Day 52; Treated With Rotenone	Ependymal-like 1	GNL3	1	chr3:52685072-52685073	4.63782e-07	0.06704	Jerber2021NG	Jerber-2021-Nat. Genet	rs3733039
10.1038/s41588-021-00801-6	CL_0000065	Response eQTL	-0.33793	Cell Proliferation On Day 52; Treated With Rotenone	Ependymal-like 1	GNL3	1	chr3:52684264-52684265	4.63782e-07	0.06704	Jerber2021NG	Jerber-2021-Nat. Genet	rs10865974
10.1038/s41588-021-00801-6	CL_0000065	Response eQTL	-0.38179	Cell Proliferation On Day 52; Treated With Rotenone	Ependymal-like 1	GNL3	1	chr3:52684138-52684139	2.15938e-08	0.06819	Jerber2021NG	Jerber-2021-Nat. Genet	rs10865973
10.1038/s41588-021-00801-6	CL_0000065	Response eQTL	-0.33793	Cell Proliferation On Day 52; Treated With Rotenone	Ependymal-like 1	GNL3	1	chr3:52683266-52683267	4.63782e-07	0.06704	Jerber2021NG	Jerber-2021-Nat. Genet	rs6445531
10.1038/s41588-021-00801-6	CL_0000065	Response eQTL	-0.33793	Cell Proliferation On Day 52; Treated With Rotenone	Ependymal-like 1	GNL3	1	chr3:52682921-52682922	4.63782e-07	0.06704	Jerber2021NG	Jerber-2021-Nat. Genet	rs34157897
10.1038/s41588-021-00801-6	CL_0000065	Response eQTL	-0.36853	Cell Proliferation On Day 52; Treated With Rotenone	Ependymal-like 1	GNL3	1	chr3:52677958-52677959	4.86564e-08	0.06754	Jerber2021NG	Jerber-2021-Nat. Genet	rs67539070
10.1038/s41588-021-00801-6	CL_0000065	Response eQTL	-0.36853	Cell Proliferation On Day 52; Treated With Rotenone	Ependymal-like 1	GNL3	1	chr3:52677515-52677516	4.86564e-08	0.06754	Jerber2021NG	Jerber-2021-Nat. Genet	rs9714129
10.1038/s41588-021-00801-6	CL_0000065	Response eQTL	-0.38179	Cell Proliferation On Day 52; Treated With Rotenone	Ependymal-like 1	GNL3	1	chr3:52677456-52677457	2.15938e-08	0.06819	Jerber2021NG	Jerber-2021-Nat. Genet	rs13061253
10.1038/s41588-021-00801-6	CL_0000065	Response eQTL	-0.36853	Cell Proliferation On Day 52; Treated With Rotenone	Ependymal-like 1	GNL3	1	chr3:52676620-52676621	4.86564e-08	0.06754	Jerber2021NG	Jerber-2021-Nat. Genet	rs2336542
10.1038/s41588-021-00801-6	CL_0000065	Response eQTL	-0.38179	Cell Proliferation On Day 52; Treated With Rotenone	Ependymal-like 1	GNL3	0	chr3:52675815-52675816	2.15938e-08	0.06819	Jerber2021NG	Jerber-2021-Nat. Genet	rs4130905
10.1038/s41588-021-00801-6	CL_0000065	Response eQTL	-0.36853	Cell Proliferation On Day 52; Treated With Rotenone	Ependymal-like 1	GNL3	1	chr3:52675243-52675244	4.86564e-08	0.06754	Jerber2021NG	Jerber-2021-Nat. Genet	rs12496634
10.1038/s41588-021-00801-6	CL_0000065	Response eQTL	-0.38179	Cell Proliferation On Day 52; Treated With Rotenone	Ependymal-like 1	GNL3	0	chr3:52674721-52674722	2.15938e-08	0.06819	Jerber2021NG	Jerber-2021-Nat. Genet	rs12496476
10.1038/s41588-021-00801-6	CL_0000065	Response eQTL	-0.38179	Cell Proliferation On Day 52; Treated With Rotenone	Ependymal-like 1	GNL3	1	chr3:52674413-52674414	2.15938e-08	0.06819	Jerber2021NG	Jerber-2021-Nat. Genet	rs34610142
10.1038/s41588-021-00801-6	CL_0000065	Response eQTL	-0.38179	Cell Proliferation On Day 52; Treated With Rotenone	Ependymal-like 1	GNL3	1	chr3:52674272-52674273	2.15938e-08	0.06819	Jerber2021NG	Jerber-2021-Nat. Genet	rs12632265
10.1038/s41588-021-00801-6	CL_0000065	Response eQTL	-0.35853	Cell Proliferation On Day 52; Treated With Rotenone	Ependymal-like 1	GNL3	0	chr3:52674059-52674060	2.11483e-07	0.06909	Jerber2021NG	Jerber-2021-Nat. Genet	rs6414569
10.1038/s41588-021-00801-6	CL_0000065	Response eQTL	-0.38611	Cell Proliferation On Day 52; Treated With Rotenone	Ependymal-like 1	GNL3	0	chr3:52674057-52674058	2.08714e-08	0.06889	Jerber2021NG	Jerber-2021-Nat. Genet	rs12637632
10.1038/s41588-021-00801-6	CL_0000065	Response eQTL	-0.38179	Cell Proliferation On Day 52; Treated With Rotenone	Ependymal-like 1	GNL3	1	chr3:52673010-52673011	2.15938e-08	0.06819	Jerber2021NG	Jerber-2021-Nat. Genet	rs6803012
10.1038/s41588-021-00801-6	CL_0000065	Response eQTL	-0.38179	Cell Proliferation On Day 52; Treated With Rotenone	Ependymal-like 1	GNL3	1	chr3:52672708-52672709	2.15938e-08	0.06819	Jerber2021NG	Jerber-2021-Nat. Genet	rs12493107
10.1038/s41588-021-00801-6	CL_0000065	Response eQTL	-0.38179	Cell Proliferation On Day 52; Treated With Rotenone	Ependymal-like 1	GNL3	1	chr3:52669599-52669600	2.15938e-08	0.06819	Jerber2021NG	Jerber-2021-Nat. Genet	rs6768697
10.1038/s41588-021-00801-6	CL_0000065	Response eQTL	-0.35798	Cell Proliferation On Day 52; Treated With Rotenone	Ependymal-like 1	GNL3	1	chr3:52667486-52667487	1.27542e-07	0.06777	Jerber2021NG	Jerber-2021-Nat. Genet	rs62255364
10.1038/s41588-021-00801-6	CL_0000065	Response eQTL	-0.35798	Cell Proliferation On Day 52; Treated With Rotenone	Ependymal-like 1	GNL3	1	chr3:52667485-52667486	1.27542e-07	0.06777	Jerber2021NG	Jerber-2021-Nat. Genet	rs77146033
10.1038/s41588-021-00801-6	CL_0000065	Response eQTL	-0.32762	Cell Proliferation On Day 52; Treated With Rotenone	Ependymal-like 1	GNL3	1	chr3:52666461-52666462	2.90821e-06	0.07005	Jerber2021NG	Jerber-2021-Nat. Genet	rs35976524
10.1038/s41588-021-00801-6	CL_0000065	Response eQTL	-0.36853	Cell Proliferation On Day 52; Treated With Rotenone	Ependymal-like 1	GNL3	1	chr3:52665725-52665726	4.86564e-08	0.06754	Jerber2021NG	Jerber-2021-Nat. Genet	rs62255362
10.1038/s41588-021-00801-6	CL_0000065	Response eQTL	-0.36853	Cell Proliferation On Day 52; Treated With Rotenone	Ependymal-like 1	GNL3	1	chr3:52664544-52664545	4.86564e-08	0.06754	Jerber2021NG	Jerber-2021-Nat. Genet	rs12488527
10.1038/s41588-021-00801-6	CL_0000065	Response eQTL	-0.39192	Cell Proliferation On Day 52; Treated With Rotenone	Ependymal-like 1	GNL3	0	chr3:52664401-52664402	8.22960e-09	0.068	Jerber2021NG	Jerber-2021-Nat. Genet	rs12488461
10.1038/s41588-021-00801-6	CL_0000065	Response eQTL	-0.36853	Cell Proliferation On Day 52; Treated With Rotenone	Ependymal-like 1	GNL3	1	chr3:52663147-52663148	4.86564e-08	0.06754	Jerber2021NG	Jerber-2021-Nat. Genet	rs11130315
10.1038/s41588-021-00801-6	CL_0000065	Response eQTL	-0.36853	Cell Proliferation On Day 52; Treated With Rotenone	Ependymal-like 1	GNL3	1	chr3:52663066-52663067	4.86564e-08	0.06754	Jerber2021NG	Jerber-2021-Nat. Genet	rs11130314
10.1038/s41588-021-00801-6	CL_0000065	Response eQTL	-0.36853	Cell Proliferation On Day 52; Treated With Rotenone	Ependymal-like 1	GNL3	1	chr3:52662782-52662783	4.86564e-08	0.06754	Jerber2021NG	Jerber-2021-Nat. Genet	rs34168767
10.1038/s41588-021-00801-6	CL_0000065	Response eQTL	-0.33793	Cell Proliferation On Day 52; Treated With Rotenone	Ependymal-like 1	GNL3	1	chr3:52660182-52660183	4.63782e-07	0.06704	Jerber2021NG	Jerber-2021-Nat. Genet	rs6804145
10.1038/s41588-021-00801-6	CL_0000065	Response eQTL	-0.33793	Cell Proliferation On Day 52; Treated With Rotenone	Ependymal-like 1	GNL3	1	chr3:52658705-52658706	4.63782e-07	0.06704	Jerber2021NG	Jerber-2021-Nat. Genet	rs7611731
10.1038/s41588-021-00801-6	CL_0000065	Response eQTL	-0.36853	Cell Proliferation On Day 52; Treated With Rotenone	Ependymal-like 1	GNL3	1	chr3:52658343-52658344	4.86564e-08	0.06754	Jerber2021NG	Jerber-2021-Nat. Genet	rs2590846
10.1038/s41588-021-00801-6	CL_0000065	Response eQTL	-0.33793	Cell Proliferation On Day 52; Treated With Rotenone	Ependymal-like 1	GNL3	1	chr3:52658108-52658109	4.63782e-07	0.06704	Jerber2021NG	Jerber-2021-Nat. Genet	rs2336149
10.1038/s41588-021-00801-6	CL_0000065	Response eQTL	-0.38179	Cell Proliferation On Day 52; Treated With Rotenone	Ependymal-like 1	GNL3	1	chr3:52657096-52657097	2.15938e-08	0.06819	Jerber2021NG	Jerber-2021-Nat. Genet	rs12486847
10.1038/s41588-021-00801-6	CL_0000065	Response eQTL	-0.38179	Cell Proliferation On Day 52; Treated With Rotenone	Ependymal-like 1	GNL3	1	chr3:52656622-52656623	2.15938e-08	0.06819	Jerber2021NG	Jerber-2021-Nat. Genet	rs2336148
10.1038/s41588-021-00801-6	CL_0000065	Response eQTL	-0.38179	Cell Proliferation On Day 52; Treated With Rotenone	Ependymal-like 1	GNL3	1	chr3:52653670-52653671	2.15938e-08	0.06819	Jerber2021NG	Jerber-2021-Nat. Genet	rs35409678
10.1038/s41588-021-00801-6	CL_0000065	Response eQTL	0.27412	Cell Proliferation On Day 52; Treated With Rotenone	Ependymal-like 1	GNL3	1	chr3:52653550-52653551	3.96469e-05	0.0667	Jerber2021NG	Jerber-2021-Nat. Genet	rs7612511
10.1038/s41588-021-00801-6	CL_0000065	Response eQTL	-0.33793	Cell Proliferation On Day 52; Treated With Rotenone	Ependymal-like 1	GNL3	1	chr3:52653546-52653547	4.63782e-07	0.06704	Jerber2021NG	Jerber-2021-Nat. Genet	rs4435633
10.1038/s41588-021-00801-6	CL_0000065	Response eQTL	-0.36853	Cell Proliferation On Day 52; Treated With Rotenone	Ependymal-like 1	GNL3	1	chr3:52652871-52652872	4.86564e-08	0.06754	Jerber2021NG	Jerber-2021-Nat. Genet	rs6770463
10.1038/s41588-021-00801-6	CL_0000065	Response eQTL	0.25121	Cell Proliferation On Day 52; Treated With Rotenone	Ependymal-like 1	GNL3	1	chr3:52652700-52652701	1.83396e-04	0.06715	Jerber2021NG	Jerber-2021-Nat. Genet	rs2878632
10.1038/s41588-021-00801-6	CL_0000065	Response eQTL	-0.38179	Cell Proliferation On Day 52; Treated With Rotenone	Ependymal-like 1	GNL3	1	chr3:52651289-52651290	2.15938e-08	0.06819	Jerber2021NG	Jerber-2021-Nat. Genet	rs35211965
10.1038/s41588-021-00801-6	CL_0000065	Response eQTL	-0.36853	Cell Proliferation On Day 52; Treated With Rotenone	Ependymal-like 1	GNL3	1	chr3:52651228-52651229	4.86564e-08	0.06754	Jerber2021NG	Jerber-2021-Nat. Genet	rs13065019
10.1038/s41588-021-00801-6	CL_0000065	Response eQTL	-0.33793	Cell Proliferation On Day 52; Treated With Rotenone	Ependymal-like 1	GNL3	1	chr3:52650112-52650113	4.63782e-07	0.06704	Jerber2021NG	Jerber-2021-Nat. Genet	rs62253740
10.1038/s41588-021-00801-6	CL_0000065	Response eQTL	-0.36853	Cell Proliferation On Day 52; Treated With Rotenone	Ependymal-like 1	GNL3	1	chr3:52649848-52649849	4.86564e-08	0.06754	Jerber2021NG	Jerber-2021-Nat. Genet	rs33967311
10.1038/s41588-021-00801-6	CL_0000065	Response eQTL	-0.36853	Cell Proliferation On Day 52; Treated With Rotenone	Ependymal-like 1	GNL3	1	chr3:52648930-52648931	4.86564e-08	0.06754	Jerber2021NG	Jerber-2021-Nat. Genet	rs2289250
10.1038/s41588-021-00801-6	CL_0000065	Response eQTL	-0.36853	Cell Proliferation On Day 52; Treated With Rotenone	Ependymal-like 1	GNL3	1	chr3:52648189-52648190	4.86564e-08	0.06754	Jerber2021NG	Jerber-2021-Nat. Genet	rs34757451
10.1038/s41588-021-00801-6	CL_0000065	Response eQTL	-0.38179	Cell Proliferation On Day 52; Treated With Rotenone	Ependymal-like 1	GNL3	1	chr3:52646807-52646808	2.15938e-08	0.06819	Jerber2021NG	Jerber-2021-Nat. Genet	rs2028216
10.1038/s41588-021-00801-6	CL_0000065	Response eQTL	-0.36853	Cell Proliferation On Day 52; Treated With Rotenone	Ependymal-like 1	GNL3	1	chr3:52644478-52644479	4.86564e-08	0.06754	Jerber2021NG	Jerber-2021-Nat. Genet	rs13086297
10.1038/s41588-021-00801-6	CL_0000065	Response eQTL	-0.33793	Cell Proliferation On Day 52; Treated With Rotenone	Ependymal-like 1	GNL3	1	chr3:52644354-52644355	4.63782e-07	0.06704	Jerber2021NG	Jerber-2021-Nat. Genet	rs13085775
10.1038/s41588-021-00801-6	CL_0000065	Response eQTL	-0.36853	Cell Proliferation On Day 52; Treated With Rotenone	Ependymal-like 1	GNL3	1	chr3:52644254-52644255	4.86564e-08	0.06754	Jerber2021NG	Jerber-2021-Nat. Genet	rs13085895
10.1038/s41588-021-00801-6	CL_0000065	Response eQTL	-0.36853	Cell Proliferation On Day 52; Treated With Rotenone	Ependymal-like 1	GNL3	1	chr3:52643944-52643945	4.86564e-08	0.06754	Jerber2021NG	Jerber-2021-Nat. Genet	rs7642198
10.1038/s41588-021-00801-6	CL_0000065	Response eQTL	-0.36853	Cell Proliferation On Day 52; Treated With Rotenone	Ependymal-like 1	GNL3	1	chr3:52642174-52642175	4.86564e-08	0.06754	Jerber2021NG	Jerber-2021-Nat. Genet	rs11130313
10.1038/s41588-021-00801-6	CL_0000065	Response eQTL	-0.36853	Cell Proliferation On Day 52; Treated With Rotenone	Ependymal-like 1	GNL3	1	chr3:52641263-52641264	4.86564e-08	0.06754	Jerber2021NG	Jerber-2021-Nat. Genet	rs13086898
10.1038/s41588-021-00801-6	CL_0000065	Response eQTL	-0.36853	Cell Proliferation On Day 52; Treated With Rotenone	Ependymal-like 1	GNL3	1	chr3:52641039-52641040	4.86564e-08	0.06754	Jerber2021NG	Jerber-2021-Nat. Genet	rs11130312
10.1038/s41588-021-00801-6	CL_0000065	Response eQTL	-0.36853	Cell Proliferation On Day 52; Treated With Rotenone	Ependymal-like 1	GNL3	1	chr3:52640989-52640990	4.86564e-08	0.06754	Jerber2021NG	Jerber-2021-Nat. Genet	rs11130311
10.1038/s41588-021-00801-6	CL_0000065	Response eQTL	-0.33793	Cell Proliferation On Day 52; Treated With Rotenone	Ependymal-like 1	GNL3	1	chr3:52640651-52640652	4.63782e-07	0.06704	Jerber2021NG	Jerber-2021-Nat. Genet	rs11130310
10.1038/s41588-021-00801-6	CL_0000065	Response eQTL	-0.36853	Cell Proliferation On Day 52; Treated With Rotenone	Ependymal-like 1	GNL3	1	chr3:52640526-52640527	4.86564e-08	0.06754	Jerber2021NG	Jerber-2021-Nat. Genet	rs13081031
10.1038/s41588-021-00801-6	CL_0000065	Response eQTL	-0.36853	Cell Proliferation On Day 52; Treated With Rotenone	Ependymal-like 1	GNL3	0	chr3:52640284-52640285	4.86564e-08	0.06754	Jerber2021NG	Jerber-2021-Nat. Genet	rs13060675
10.1038/s41588-021-00801-6	CL_0000065	Response eQTL	-0.38179	Cell Proliferation On Day 52; Treated With Rotenone	Ependymal-like 1	GNL3	1	chr3:52638726-52638727	2.15938e-08	0.06819	Jerber2021NG	Jerber-2021-Nat. Genet	rs11720432
10.1038/s41588-021-00801-6	CL_0000065	Response eQTL	-0.38179	Cell Proliferation On Day 52; Treated With Rotenone	Ependymal-like 1	GNL3	1	chr3:52638515-52638516	2.15938e-08	0.06819	Jerber2021NG	Jerber-2021-Nat. Genet	rs11719514
10.1038/s41588-021-00801-6	CL_0000065	Response eQTL	-0.36853	Cell Proliferation On Day 52; Treated With Rotenone	Ependymal-like 1	GNL3	1	chr3:52638151-52638152	4.86564e-08	0.06754	Jerber2021NG	Jerber-2021-Nat. Genet	rs13068293
10.1038/s41588-021-00801-6	CL_0000065	Response eQTL	-0.33793	Cell Proliferation On Day 52; Treated With Rotenone	Ependymal-like 1	GNL3	1	chr3:52636028-52636029	4.63782e-07	0.06704	Jerber2021NG	Jerber-2021-Nat. Genet	rs13098776
10.1038/s41588-021-00801-6	CL_0000065	Response eQTL	-0.32958	Cell Proliferation On Day 52; Treated With Rotenone	Ependymal-like 1	GNL3	1	chr3:52635373-52635374	9.79961e-07	0.06732	Jerber2021NG	Jerber-2021-Nat. Genet	rs6796726
10.1038/s41588-021-00801-6	CL_0000065	Response eQTL	-0.33862	Cell Proliferation On Day 52; Treated With Rotenone	Ependymal-like 1	GNL3	1	chr3:52634103-52634104	9.61253e-07	0.06911	Jerber2021NG	Jerber-2021-Nat. Genet	rs2083180
10.1038/s41588-021-00801-6	CL_0000065	Response eQTL	-0.36853	Cell Proliferation On Day 52; Treated With Rotenone	Ependymal-like 1	GNL3	1	chr3:52632850-52632851	4.86564e-08	0.06754	Jerber2021NG	Jerber-2021-Nat. Genet	rs13069481
10.1038/s41588-021-00801-6	CL_0000065	Response eQTL	-0.36853	Cell Proliferation On Day 52; Treated With Rotenone	Ependymal-like 1	GNL3	1	chr3:52632634-52632635	4.86564e-08	0.06754	Jerber2021NG	Jerber-2021-Nat. Genet	rs4687548
10.1038/s41588-021-00801-6	CL_0000065	Response eQTL	-0.33793	Cell Proliferation On Day 52; Treated With Rotenone	Ependymal-like 1	GNL3	1	chr3:52629866-52629867	4.63782e-07	0.06704	Jerber2021NG	Jerber-2021-Nat. Genet	rs7622694
10.1038/s41588-021-00801-6	CL_0000065	Response eQTL	-0.33793	Cell Proliferation On Day 52; Treated With Rotenone	Ependymal-like 1	GNL3	1	chr3:52628706-52628707	4.63782e-07	0.06704	Jerber2021NG	Jerber-2021-Nat. Genet	rs6445529
10.1038/s41588-021-00801-6	CL_0000065	Response eQTL	-0.36853	Cell Proliferation On Day 52; Treated With Rotenone	Ependymal-like 1	GNL3	1	chr3:52627624-52627625	4.86564e-08	0.06754	Jerber2021NG	Jerber-2021-Nat. Genet	rs35249778
10.1038/s41588-021-00801-6	CL_0000065	Response eQTL	-0.36853	Cell Proliferation On Day 52; Treated With Rotenone	Ependymal-like 1	GNL3	1	chr3:52625947-52625948	4.86564e-08	0.06754	Jerber2021NG	Jerber-2021-Nat. Genet	rs1561337
10.1038/s41588-021-00801-6	CL_0000065	Response eQTL	-0.36853	Cell Proliferation On Day 52; Treated With Rotenone	Ependymal-like 1	GNL3	1	chr3:52625108-52625109	4.86564e-08	0.06754	Jerber2021NG	Jerber-2021-Nat. Genet	rs34215106
10.1038/s41588-021-00801-6	CL_0000065	Response eQTL	-0.38179	Cell Proliferation On Day 52; Treated With Rotenone	Ependymal-like 1	GNL3	1	chr3:52623456-52623457	2.15938e-08	0.06819	Jerber2021NG	Jerber-2021-Nat. Genet	rs34537256
10.1038/s41588-021-00801-6	CL_0000065	Response eQTL	-0.36853	Cell Proliferation On Day 52; Treated With Rotenone	Ependymal-like 1	GNL3	1	chr3:52622986-52622987	4.86564e-08	0.06754	Jerber2021NG	Jerber-2021-Nat. Genet	rs13064064
10.1038/s41588-021-00801-6	CL_0000065	Response eQTL	-0.36853	Cell Proliferation On Day 52; Treated With Rotenone	Ependymal-like 1	GNL3	1	chr3:52622324-52622325	4.86564e-08	0.06754	Jerber2021NG	Jerber-2021-Nat. Genet	rs4687639
10.1038/s41588-021-00801-6	CL_0000065	Response eQTL	-0.36853	Cell Proliferation On Day 52; Treated With Rotenone	Ependymal-like 1	GNL3	1	chr3:52622076-52622077	4.86564e-08	0.06754	Jerber2021NG	Jerber-2021-Nat. Genet	rs11717043
10.1038/s41588-021-00801-6	CL_0000065	Response eQTL	-0.32958	Cell Proliferation On Day 52; Treated With Rotenone	Ependymal-like 1	GNL3	1	chr3:52621399-52621400	9.79961e-07	0.06732	Jerber2021NG	Jerber-2021-Nat. Genet	rs34341238
10.1038/s41588-021-00801-6	CL_0000065	Response eQTL	-0.38179	Cell Proliferation On Day 52; Treated With Rotenone	Ependymal-like 1	GNL3	1	chr3:52619398-52619399	2.15938e-08	0.06819	Jerber2021NG	Jerber-2021-Nat. Genet	rs62253733
10.1038/s41588-021-00801-6	CL_0000065	Response eQTL	-0.38179	Cell Proliferation On Day 52; Treated With Rotenone	Ependymal-like 1	GNL3	0	chr3:52617950-52617951	2.15938e-08	0.06819	Jerber2021NG	Jerber-2021-Nat. Genet	rs4687638
10.1038/s41588-021-00801-6	CL_0000065	Response eQTL	-0.32762	Cell Proliferation On Day 52; Treated With Rotenone	Ependymal-like 1	GNL3	1	chr3:52616332-52616333	2.90821e-06	0.07005	Jerber2021NG	Jerber-2021-Nat. Genet	rs10510760
10.1038/s41588-021-00801-6	CL_0000065	Response eQTL	-0.27138	Cell Proliferation On Day 52; Treated With Rotenone	Ependymal-like 1	GNL3	1	chr3:52615732-52615733	4.29307e-05	0.06633	Jerber2021NG	Jerber-2021-Nat. Genet	rs13083798
10.1038/s41588-021-00801-6	CL_0000065	Response eQTL	-0.2505	Cell Proliferation On Day 52; Treated With Rotenone	Ependymal-like 1	GNL3	1	chr3:52614249-52614250	1.76295e-04	0.06679	Jerber2021NG	Jerber-2021-Nat. Genet	rs9879090
10.1038/s41588-021-00801-6	CL_0000065	Response eQTL	-0.38179	Cell Proliferation On Day 52; Treated With Rotenone	Ependymal-like 1	GNL3	1	chr3:52613433-52613434	2.15938e-08	0.06819	Jerber2021NG	Jerber-2021-Nat. Genet	rs11709448
10.1038/s41588-021-00801-6	CL_0000065	Response eQTL	-0.38179	Cell Proliferation On Day 52; Treated With Rotenone	Ependymal-like 1	GNL3	1	chr3:52610820-52610821	2.15938e-08	0.06819	Jerber2021NG	Jerber-2021-Nat. Genet	rs13065851
10.1038/s41588-021-00801-6	CL_0000065	Response eQTL	-0.36853	Cell Proliferation On Day 52; Treated With Rotenone	Ependymal-like 1	GNL3	1	chr3:52609669-52609670	4.86564e-08	0.06754	Jerber2021NG	Jerber-2021-Nat. Genet	rs3755806
10.1038/s41588-021-00801-6	CL_0000065	Response eQTL	-0.33793	Cell Proliferation On Day 52; Treated With Rotenone	Ependymal-like 1	GNL3	1	chr3:52609291-52609292	4.63782e-07	0.06704	Jerber2021NG	Jerber-2021-Nat. Genet	rs3733045
10.1038/s41588-021-00801-6	CL_0000065	Response eQTL	-0.36853	Cell Proliferation On Day 52; Treated With Rotenone	Ependymal-like 1	GNL3	1	chr3:52608920-52608921	4.86564e-08	0.06754	Jerber2021NG	Jerber-2021-Nat. Genet	rs12487591
10.1038/s41588-021-00801-6	CL_0000065	Response eQTL	-0.36853	Cell Proliferation On Day 52; Treated With Rotenone	Ependymal-like 1	GNL3	1	chr3:52608471-52608472	4.86564e-08	0.06754	Jerber2021NG	Jerber-2021-Nat. Genet	rs3774365
10.1038/s41588-021-00801-6	CL_0000065	Response eQTL	-0.33793	Cell Proliferation On Day 52; Treated With Rotenone	Ependymal-like 1	GNL3	1	chr3:52607239-52607240	4.63782e-07	0.06704	Jerber2021NG	Jerber-2021-Nat. Genet	rs3774366
10.1038/s41588-021-00801-6	CL_0000065	Response eQTL	-0.32027	Cell Proliferation On Day 52; Treated With Rotenone	Ependymal-like 1	GNL3	1	chr3:52605241-52605242	1.86941e-06	0.06718	Jerber2021NG	Jerber-2021-Nat. Genet	rs11130308
10.1038/s41588-021-00801-6	CL_0000065	Response eQTL	-0.36853	Cell Proliferation On Day 52; Treated With Rotenone	Ependymal-like 1	GNL3	1	chr3:52604466-52604467	4.86564e-08	0.06754	Jerber2021NG	Jerber-2021-Nat. Genet	rs10433615
10.1038/s41588-021-00801-6	CL_0000065	Response eQTL	-0.2505	Cell Proliferation On Day 52; Treated With Rotenone	Ependymal-like 1	GNL3	1	chr3:52603470-52603471	1.76295e-04	0.06679	Jerber2021NG	Jerber-2021-Nat. Genet	rs2276824
10.1038/s41588-021-00801-6	CL_0000065	Response eQTL	-0.33793	Cell Proliferation On Day 52; Treated With Rotenone	Ependymal-like 1	GNL3	1	chr3:52600603-52600604	4.63782e-07	0.06704	Jerber2021NG	Jerber-2021-Nat. Genet	rs9917834
10.1038/s41588-021-00801-6	CL_0000065	Response eQTL	-0.38179	Cell Proliferation On Day 52; Treated With Rotenone	Ependymal-like 1	GNL3	1	chr3:52600589-52600590	2.15938e-08	0.06819	Jerber2021NG	Jerber-2021-Nat. Genet	rs34173654
10.1038/s41588-021-00801-6	CL_0000065	Response eQTL	-0.32625	Cell Proliferation On Day 52; Treated With Rotenone	Ependymal-like 1	GNL3	1	chr3:52600076-52600077	2.17031e-06	0.06887	Jerber2021NG	Jerber-2021-Nat. Genet	rs4687637
10.1038/s41588-021-00801-6	CL_0000065	Response eQTL	-0.38179	Cell Proliferation On Day 52; Treated With Rotenone	Ependymal-like 1	GNL3	1	chr3:52599913-52599914	2.15938e-08	0.06819	Jerber2021NG	Jerber-2021-Nat. Genet	rs4687636
10.1038/s41588-021-00801-6	CL_0000065	Response eQTL	-0.36853	Cell Proliferation On Day 52; Treated With Rotenone	Ependymal-like 1	GNL3	1	chr3:52598895-52598896	4.86564e-08	0.06754	Jerber2021NG	Jerber-2021-Nat. Genet	rs6790330
10.1038/s41588-021-00801-6	CL_0000065	Response eQTL	-0.36853	Cell Proliferation On Day 52; Treated With Rotenone	Ependymal-like 1	GNL3	1	chr3:52598341-52598342	4.86564e-08	0.06754	Jerber2021NG	Jerber-2021-Nat. Genet	rs62253703
10.1038/s41588-021-00801-6	CL_0000065	Response eQTL	-0.36853	Cell Proliferation On Day 52; Treated With Rotenone	Ependymal-like 1	GNL3	1	chr3:52596532-52596533	4.86564e-08	0.06754	Jerber2021NG	Jerber-2021-Nat. Genet	rs4687633
10.1038/s41588-021-00801-6	CL_0000065	Response eQTL	-0.38179	Cell Proliferation On Day 52; Treated With Rotenone	Ependymal-like 1	GNL3	1	chr3:52595734-52595735	2.15938e-08	0.06819	Jerber2021NG	Jerber-2021-Nat. Genet	rs2336145
10.1038/s41588-021-00801-6	CL_0000065	Response eQTL	-0.36853	Cell Proliferation On Day 52; Treated With Rotenone	Ependymal-like 1	GNL3	1	chr3:52595617-52595618	4.86564e-08	0.06754	Jerber2021NG	Jerber-2021-Nat. Genet	rs2164884
10.1038/s41588-021-00801-6	CL_0000065	Response eQTL	-0.38179	Cell Proliferation On Day 52; Treated With Rotenone	Ependymal-like 1	GNL3	1	chr3:52595370-52595371	2.15938e-08	0.06819	Jerber2021NG	Jerber-2021-Nat. Genet	rs2118540
10.1038/s41588-021-00801-6	CL_0000065	Response eQTL	-0.33793	Cell Proliferation On Day 52; Treated With Rotenone	Ependymal-like 1	GNL3	1	chr3:52595161-52595162	4.63782e-07	0.06704	Jerber2021NG	Jerber-2021-Nat. Genet	rs34754793
10.1038/s41588-021-00801-6	CL_0000065	Response eQTL	-0.38179	Cell Proliferation On Day 52; Treated With Rotenone	Ependymal-like 1	GNL3	1	chr3:52594800-52594801	2.15938e-08	0.06819	Jerber2021NG	Jerber-2021-Nat. Genet	rs11714419
10.1038/s41588-021-00801-6	CL_0000065	Response eQTL	-0.35307	Cell Proliferation On Day 52; Treated With Rotenone	Ependymal-like 1	GNL3	1	chr3:52594305-52594306	6.37030e-08	0.06529	Jerber2021NG	Jerber-2021-Nat. Genet	rs7628578
10.1038/s41588-021-00801-6	CL_0000065	Response eQTL	-0.28296	Cell Proliferation On Day 52; Treated With Rotenone	Ependymal-like 1	GNL3	1	chr3:52594040-52594041	1.04230e-05	0.06419	Jerber2021NG	Jerber-2021-Nat. Genet	rs2577831
10.1038/s41588-021-00801-6	CL_0000065	Response eQTL	-0.36853	Cell Proliferation On Day 52; Treated With Rotenone	Ependymal-like 1	GNL3	1	chr3:52593644-52593645	4.86564e-08	0.06754	Jerber2021NG	Jerber-2021-Nat. Genet	rs12498066
10.1038/s41588-021-00801-6	CL_0000065	Response eQTL	-0.36853	Cell Proliferation On Day 52; Treated With Rotenone	Ependymal-like 1	GNL3	1	chr3:52593470-52593471	4.86564e-08	0.06754	Jerber2021NG	Jerber-2021-Nat. Genet	rs13085331
10.1038/s41588-021-00801-6	CL_0000065	Response eQTL	-0.33793	Cell Proliferation On Day 52; Treated With Rotenone	Ependymal-like 1	GNL3	1	chr3:52592630-52592631	4.63782e-07	0.06704	Jerber2021NG	Jerber-2021-Nat. Genet	rs2336146
10.1038/s41588-021-00801-6	CL_0000065	Response eQTL	-0.27412	Cell Proliferation On Day 52; Treated With Rotenone	Ependymal-like 1	GNL3	1	chr3:52592427-52592428	3.96469e-05	0.0667	Jerber2021NG	Jerber-2021-Nat. Genet	rs2336147
10.1038/s41588-021-00801-6	CL_0000065	Response eQTL	-0.36853	Cell Proliferation On Day 52; Treated With Rotenone	Ependymal-like 1	GNL3	1	chr3:52591003-52591004	4.86564e-08	0.06754	Jerber2021NG	Jerber-2021-Nat. Genet	rs62253700
10.1038/s41588-021-00801-6	CL_0000065	Response eQTL	-0.36853	Cell Proliferation On Day 52; Treated With Rotenone	Ependymal-like 1	GNL3	1	chr3:52590753-52590754	4.86564e-08	0.06754	Jerber2021NG	Jerber-2021-Nat. Genet	rs68021750
10.1038/s41588-021-00801-6	CL_0000065	Response eQTL	-0.38179	Cell Proliferation On Day 52; Treated With Rotenone	Ependymal-like 1	GNL3	1	chr3:52590707-52590708	2.15938e-08	0.06819	Jerber2021NG	Jerber-2021-Nat. Genet	rs11708075
10.1038/s41588-021-00801-6	CL_0000065	Response eQTL	-0.38179	Cell Proliferation On Day 52; Treated With Rotenone	Ependymal-like 1	GNL3	1	chr3:52590217-52590218	2.15938e-08	0.06819	Jerber2021NG	Jerber-2021-Nat. Genet	rs4336110
10.1038/s41588-021-00801-6	CL_0000065	Response eQTL	-0.27412	Cell Proliferation On Day 52; Treated With Rotenone	Ependymal-like 1	GNL3	1	chr3:52588070-52588071	3.96469e-05	0.0667	Jerber2021NG	Jerber-2021-Nat. Genet	rs2590838
10.1038/s41588-021-00801-6	CL_0000065	Response eQTL	-0.33793	Cell Proliferation On Day 52; Treated With Rotenone	Ependymal-like 1	GNL3	1	chr3:52587823-52587824	4.63782e-07	0.06704	Jerber2021NG	Jerber-2021-Nat. Genet	rs3852066
10.1038/s41588-021-00801-6	CL_0000065	Response eQTL	-0.33793	Cell Proliferation On Day 52; Treated With Rotenone	Ependymal-like 1	GNL3	1	chr3:52587611-52587612	4.63782e-07	0.06704	Jerber2021NG	Jerber-2021-Nat. Genet	rs3733046
10.1038/s41588-021-00801-6	CL_0000065	Response eQTL	-0.35064	Cell Proliferation On Day 52; Treated With Rotenone	Ependymal-like 1	GNL3	0	chr3:52585946-52585947	1.52434e-07	0.06679	Jerber2021NG	Jerber-2021-Nat. Genet	rs12637627
10.1038/s41588-021-00801-6	CL_0000065	Response eQTL	-0.3401	Cell Proliferation On Day 52; Treated With Rotenone	Ependymal-like 1	GNL3	1	chr3:52585820-52585821	7.34874e-07	0.06868	Jerber2021NG	Jerber-2021-Nat. Genet	rs12629701
10.1038/s41588-021-00801-6	CL_0000065	Response eQTL	-0.35064	Cell Proliferation On Day 52; Treated With Rotenone	Ependymal-like 1	GNL3	1	chr3:52585776-52585777	1.52434e-07	0.06679	Jerber2021NG	Jerber-2021-Nat. Genet	rs12629699
10.1038/s41588-021-00801-6	CL_0000065	Response eQTL	-0.35064	Cell Proliferation On Day 52; Treated With Rotenone	Ependymal-like 1	GNL3	0	chr3:52584925-52584926	1.52434e-07	0.06679	Jerber2021NG	Jerber-2021-Nat. Genet	rs7614498
10.1038/s41588-021-00801-6	CL_0000065	Response eQTL	-0.40003	Cell Proliferation On Day 52; Treated With Rotenone	Ependymal-like 1	GNL3	1	chr3:52584303-52584304	4.66446e-09	0.06828	Jerber2021NG	Jerber-2021-Nat. Genet	rs12487445
10.1038/s41588-021-00801-6	CL_0000065	Response eQTL	-0.35064	Cell Proliferation On Day 52; Treated With Rotenone	Ependymal-like 1	GNL3	1	chr3:52584002-52584003	1.52434e-07	0.06679	Jerber2021NG	Jerber-2021-Nat. Genet	rs11720243
10.1038/s41588-021-00801-6	CL_0000065	Response eQTL	-0.35064	Cell Proliferation On Day 52; Treated With Rotenone	Ependymal-like 1	GNL3	1	chr3:52583786-52583787	1.52434e-07	0.06679	Jerber2021NG	Jerber-2021-Nat. Genet	rs11720159
10.1038/s41588-021-00801-6	CL_0000065	Response eQTL	-0.40003	Cell Proliferation On Day 52; Treated With Rotenone	Ependymal-like 1	GNL3	1	chr3:52582962-52582963	4.66446e-09	0.06828	Jerber2021NG	Jerber-2021-Nat. Genet	rs13078422
10.1038/s41588-021-00801-6	CL_0000065	Response eQTL	-0.38386	Cell Proliferation On Day 52; Treated With Rotenone	Ependymal-like 1	GNL3	1	chr3:52581285-52581286	1.26369e-08	0.06745	Jerber2021NG	Jerber-2021-Nat. Genet	rs4687630
10.1038/s41588-021-00801-6	CL_0000065	Response eQTL	-0.35064	Cell Proliferation On Day 52; Treated With Rotenone	Ependymal-like 1	GNL3	1	chr3:52581211-52581212	1.52434e-07	0.06679	Jerber2021NG	Jerber-2021-Nat. Genet	rs4687629
10.1038/s41588-021-00801-6	CL_0000065	Response eQTL	-0.38386	Cell Proliferation On Day 52; Treated With Rotenone	Ependymal-like 1	GNL3	1	chr3:52580654-52580655	1.26369e-08	0.06745	Jerber2021NG	Jerber-2021-Nat. Genet	rs11718509
10.1038/s41588-021-00801-6	CL_0000065	Response eQTL	-0.40003	Cell Proliferation On Day 52; Treated With Rotenone	Ependymal-like 1	GNL3	1	chr3:52579640-52579641	4.66446e-09	0.06828	Jerber2021NG	Jerber-2021-Nat. Genet	rs35107891
10.1038/s41588-021-00801-6	CL_0000065	Response eQTL	-0.40003	Cell Proliferation On Day 52; Treated With Rotenone	Ependymal-like 1	GNL3	1	chr3:52578162-52578163	4.66446e-09	0.06828	Jerber2021NG	Jerber-2021-Nat. Genet	rs34115864
10.1038/s41588-021-00801-6	CL_0000065	Response eQTL	-0.38386	Cell Proliferation On Day 52; Treated With Rotenone	Ependymal-like 1	GNL3	1	chr3:52578143-52578144	1.26369e-08	0.06745	Jerber2021NG	Jerber-2021-Nat. Genet	rs34954168
10.1038/s41588-021-00801-6	CL_0000065	Response eQTL	-0.3401	Cell Proliferation On Day 52; Treated With Rotenone	Ependymal-like 1	GNL3	1	chr3:52577397-52577398	7.34874e-07	0.06868	Jerber2021NG	Jerber-2021-Nat. Genet	rs11718420
10.1038/s41588-021-00801-6	CL_0000065	Response eQTL	-0.40003	Cell Proliferation On Day 52; Treated With Rotenone	Ependymal-like 1	GNL3	1	chr3:52576635-52576636	4.66446e-09	0.06828	Jerber2021NG	Jerber-2021-Nat. Genet	rs17264436
10.1038/s41588-021-00801-6	CL_0000065	Response eQTL	-0.35064	Cell Proliferation On Day 52; Treated With Rotenone	Ependymal-like 1	GNL3	1	chr3:52576399-52576400	1.52434e-07	0.06679	Jerber2021NG	Jerber-2021-Nat. Genet	rs7652191
10.1038/s41588-021-00801-6	CL_0000065	Response eQTL	-0.35547	Cell Proliferation On Day 52; Treated With Rotenone	Ependymal-like 1	GNL3	0	chr3:52575694-52575695	5.67712e-07	0.07107	Jerber2021NG	Jerber-2021-Nat. Genet	rs6805539
10.1038/s41588-021-00801-6	CL_0000065	Response eQTL	-0.35064	Cell Proliferation On Day 52; Treated With Rotenone	Ependymal-like 1	GNL3	1	chr3:52575346-52575347	1.52434e-07	0.06679	Jerber2021NG	Jerber-2021-Nat. Genet	rs6805156
10.1038/s41588-021-00801-6	CL_0000065	Response eQTL	-0.38386	Cell Proliferation On Day 52; Treated With Rotenone	Ependymal-like 1	GNL3	1	chr3:52575141-52575142	1.26369e-08	0.06745	Jerber2021NG	Jerber-2021-Nat. Genet	rs6762457
10.1038/s41588-021-00801-6	CL_0000065	Response eQTL	-0.38386	Cell Proliferation On Day 52; Treated With Rotenone	Ependymal-like 1	GNL3	1	chr3:52574933-52574934	1.26369e-08	0.06745	Jerber2021NG	Jerber-2021-Nat. Genet	rs4687547
10.1038/s41588-021-00801-6	CL_0000065	Response eQTL	-0.40003	Cell Proliferation On Day 52; Treated With Rotenone	Ependymal-like 1	GNL3	1	chr3:52573669-52573670	4.66446e-09	0.06828	Jerber2021NG	Jerber-2021-Nat. Genet	rs12632381
10.1038/s41588-021-00801-6	CL_0000065	Response eQTL	-0.40003	Cell Proliferation On Day 52; Treated With Rotenone	Ependymal-like 1	GNL3	1	chr3:52573666-52573667	4.66446e-09	0.06828	Jerber2021NG	Jerber-2021-Nat. Genet	rs11130307
10.1038/s41588-021-00801-6	CL_0000065	Response eQTL	-0.35064	Cell Proliferation On Day 52; Treated With Rotenone	Ependymal-like 1	GNL3	1	chr3:52572350-52572351	1.52434e-07	0.06679	Jerber2021NG	Jerber-2021-Nat. Genet	rs7625743
10.1038/s41588-021-00801-6	CL_0000065	Response eQTL	-0.3401	Cell Proliferation On Day 52; Treated With Rotenone	Ependymal-like 1	GNL3	1	chr3:52572276-52572277	7.34874e-07	0.06868	Jerber2021NG	Jerber-2021-Nat. Genet	rs11714565
10.1038/s41588-021-00801-6	CL_0000065	Response eQTL	-0.40003	Cell Proliferation On Day 52; Treated With Rotenone	Ependymal-like 1	GNL3	1	chr3:52571958-52571959	4.66446e-09	0.06828	Jerber2021NG	Jerber-2021-Nat. Genet	rs7623199
10.1038/s41588-021-00801-6	CL_0000065	Response eQTL	-0.3401	Cell Proliferation On Day 52; Treated With Rotenone	Ependymal-like 1	GNL3	1	chr3:52571927-52571928	7.34874e-07	0.06868	Jerber2021NG	Jerber-2021-Nat. Genet	rs4687546
10.1038/s41588-021-00801-6	CL_0000065	Response eQTL	-0.3401	Cell Proliferation On Day 52; Treated With Rotenone	Ependymal-like 1	GNL3	1	chr3:52571120-52571121	7.34874e-07	0.06868	Jerber2021NG	Jerber-2021-Nat. Genet	rs6788993
10.1038/s41588-021-00801-6	CL_0000065	Response eQTL	-0.33629	Cell Proliferation On Day 52; Treated With Rotenone	Ependymal-like 1	GNL3	1	chr3:52570989-52570990	1.02895e-06	0.06883	Jerber2021NG	Jerber-2021-Nat. Genet	rs6788887
10.1038/s41588-021-00801-6	CL_0000065	Response eQTL	-0.35064	Cell Proliferation On Day 52; Treated With Rotenone	Ependymal-like 1	GNL3	1	chr3:52570845-52570846	1.52434e-07	0.06679	Jerber2021NG	Jerber-2021-Nat. Genet	rs6786043
10.1038/s41588-021-00801-6	CL_0000065	Response eQTL	-0.3401	Cell Proliferation On Day 52; Treated With Rotenone	Ependymal-like 1	GNL3	1	chr3:52570164-52570165	7.34874e-07	0.06868	Jerber2021NG	Jerber-2021-Nat. Genet	rs9758945
10.1038/s41588-021-00801-6	CL_0000065	Response eQTL	-0.33171	Cell Proliferation On Day 52; Treated With Rotenone	Ependymal-like 1	GNL3	1	chr3:52569336-52569337	1.53362e-06	0.06901	Jerber2021NG	Jerber-2021-Nat. Genet	rs10433550
10.1038/s41588-021-00801-6	CL_0000065	Response eQTL	-0.35064	Cell Proliferation On Day 52; Treated With Rotenone	Ependymal-like 1	GNL3	1	chr3:52568258-52568259	1.52434e-07	0.06679	Jerber2021NG	Jerber-2021-Nat. Genet	rs13063160
10.1038/s41588-021-00801-6	CL_0000065	Response eQTL	-0.35064	Cell Proliferation On Day 52; Treated With Rotenone	Ependymal-like 1	GNL3	1	chr3:52566983-52566984	1.52434e-07	0.06679	Jerber2021NG	Jerber-2021-Nat. Genet	rs1821879
10.1038/s41588-021-00801-6	CL_0000065	Response eQTL	-0.40003	Cell Proliferation On Day 52; Treated With Rotenone	Ependymal-like 1	GNL3	1	chr3:52565906-52565907	4.66446e-09	0.06828	Jerber2021NG	Jerber-2021-Nat. Genet	rs6798246
10.1038/s41588-021-00801-6	CL_0000065	Response eQTL	-0.3401	Cell Proliferation On Day 52; Treated With Rotenone	Ependymal-like 1	GNL3	1	chr3:52565773-52565774	7.34874e-07	0.06868	Jerber2021NG	Jerber-2021-Nat. Genet	rs6786919
10.1038/s41588-021-00801-6	CL_0000065	Response eQTL	-0.3401	Cell Proliferation On Day 52; Treated With Rotenone	Ependymal-like 1	GNL3	1	chr3:52564592-52564593	7.34874e-07	0.06868	Jerber2021NG	Jerber-2021-Nat. Genet	rs13060048
10.1038/s41588-021-00801-6	CL_0000065	Response eQTL	-0.35064	Cell Proliferation On Day 52; Treated With Rotenone	Ependymal-like 1	GNL3	1	chr3:52564524-52564525	1.52434e-07	0.06679	Jerber2021NG	Jerber-2021-Nat. Genet	rs13059862
10.1038/s41588-021-00801-6	CL_0000065	Response eQTL	-0.40003	Cell Proliferation On Day 52; Treated With Rotenone	Ependymal-like 1	GNL3	1	chr3:52563648-52563649	4.66446e-09	0.06828	Jerber2021NG	Jerber-2021-Nat. Genet	rs2289249
10.1038/s41588-021-00801-6	CL_0000065	Response eQTL	-0.38425	Cell Proliferation On Day 52; Treated With Rotenone	Ependymal-like 1	GNL3	1	chr3:52562898-52562899	1.23880e-08	0.06748	Jerber2021NG	Jerber-2021-Nat. Genet	rs33964154
10.1038/s41588-021-00801-6	CL_0000065	Response eQTL	-0.40003	Cell Proliferation On Day 52; Treated With Rotenone	Ependymal-like 1	GNL3	1	chr3:52562382-52562383	4.66446e-09	0.06828	Jerber2021NG	Jerber-2021-Nat. Genet	rs6778844
10.1038/s41588-021-00801-6	CL_0000065	Response eQTL	-0.3401	Cell Proliferation On Day 52; Treated With Rotenone	Ependymal-like 1	GNL3	1	chr3:52559214-52559215	7.34874e-07	0.06868	Jerber2021NG	Jerber-2021-Nat. Genet	rs3796353
10.1038/s41588-021-00801-6	CL_0000065	Response eQTL	-0.3401	Cell Proliferation On Day 52; Treated With Rotenone	Ependymal-like 1	GNL3	1	chr3:52559122-52559123	7.34874e-07	0.06868	Jerber2021NG	Jerber-2021-Nat. Genet	rs17052259
10.1038/s41588-021-00801-6	CL_0000065	Response eQTL	-0.3401	Cell Proliferation On Day 52; Treated With Rotenone	Ependymal-like 1	GNL3	1	chr3:52559103-52559104	7.34874e-07	0.06868	Jerber2021NG	Jerber-2021-Nat. Genet	rs17052256
10.1038/s41588-021-00801-6	CL_0000065	Response eQTL	-0.3401	Cell Proliferation On Day 52; Treated With Rotenone	Ependymal-like 1	GNL3	1	chr3:52552666-52552667	7.34874e-07	0.06868	Jerber2021NG	Jerber-2021-Nat. Genet	rs1570
10.1038/s41588-021-00801-6	CL_0000065	Response eQTL	-0.40003	Cell Proliferation On Day 52; Treated With Rotenone	Ependymal-like 1	GNL3	1	chr3:52551974-52551975	4.66446e-09	0.06828	Jerber2021NG	Jerber-2021-Nat. Genet	rs1961958
10.1038/s41588-021-00801-6	CL_0000065	Response eQTL	-0.40003	Cell Proliferation On Day 52; Treated With Rotenone	Ependymal-like 1	GNL3	1	chr3:52551744-52551745	4.66446e-09	0.06828	Jerber2021NG	Jerber-2021-Nat. Genet	rs1961959
10.1038/s41588-021-00801-6	CL_0000065	Response eQTL	-0.38321	Cell Proliferation On Day 52; Treated With Rotenone	Ependymal-like 1	GNL3	1	chr3:52550771-52550772	1.30207e-08	0.0674	Jerber2021NG	Jerber-2021-Nat. Genet	rs2251219
10.1038/s41588-021-00801-6	CL_0000065	Response eQTL	-0.3401	Cell Proliferation On Day 52; Treated With Rotenone	Ependymal-like 1	GNL3	1	chr3:52550699-52550700	7.34874e-07	0.06868	Jerber2021NG	Jerber-2021-Nat. Genet	rs2878628
10.1038/s41588-021-00801-6	CL_0000065	Response eQTL	-0.34976	Cell Proliferation On Day 52; Treated With Rotenone	Ependymal-like 1	GNL3	1	chr3:52541815-52541816	7.16993e-07	0.07056	Jerber2021NG	Jerber-2021-Nat. Genet	rs1133415
10.1038/s41588-021-00801-6	CL_0000065	Response eQTL	-0.40287	Cell Proliferation On Day 52; Treated With Rotenone	Ependymal-like 1	GNL3	1	chr3:52539828-52539829	1.59134e-09	0.06676	Jerber2021NG	Jerber-2021-Nat. Genet	rs62256903
10.1038/s41588-021-00801-6	CL_0000065	Response eQTL	-0.39371	Cell Proliferation On Day 52; Treated With Rotenone	Ependymal-like 1	GNL3	1	chr3:52539080-52539081	9.76286e-09	0.06865	Jerber2021NG	Jerber-2021-Nat. Genet	rs13076398
10.1038/s41588-021-00801-6	CL_0000065	Response eQTL	-0.36416	Cell Proliferation On Day 52; Treated With Rotenone	Ependymal-like 1	GNL3	1	chr3:52538431-52538432	1.23236e-07	0.06886	Jerber2021NG	Jerber-2021-Nat. Genet	rs6445528
10.1038/s41588-021-00801-6	CL_0000065	Response eQTL	-0.36526	Cell Proliferation On Day 52; Treated With Rotenone	Ependymal-like 1	GNL3	1	chr3:52538040-52538041	1.17605e-07	0.06895	Jerber2021NG	Jerber-2021-Nat. Genet	rs7638808
10.1038/s41588-021-00801-6	CL_0000065	Response eQTL	-0.39371	Cell Proliferation On Day 52; Treated With Rotenone	Ependymal-like 1	GNL3	1	chr3:52535082-52535083	9.76286e-09	0.06865	Jerber2021NG	Jerber-2021-Nat. Genet	rs4687626
10.1038/s41588-021-00801-6	CL_0000065	Response eQTL	-0.28389	Cell Proliferation On Day 52; Treated With Rotenone	Ependymal-like 1	GNL3	1	chr3:52534789-52534790	2.41824e-05	0.06724	Jerber2021NG	Jerber-2021-Nat. Genet	rs7639267
10.1038/s41588-021-00801-6	CL_0000065	Response eQTL	-0.30223	Cell Proliferation On Day 52; Treated With Rotenone	Ependymal-like 1	GNL3	1	chr3:52533601-52533602	2.28400e-06	0.06394	Jerber2021NG	Jerber-2021-Nat. Genet	rs66782572
10.1038/s41588-021-00801-6	CL_0000065	Response eQTL	-0.39371	Cell Proliferation On Day 52; Treated With Rotenone	Ependymal-like 1	GNL3	1	chr3:52533172-52533173	9.76286e-09	0.06865	Jerber2021NG	Jerber-2021-Nat. Genet	rs28661185
10.1038/s41588-021-00801-6	CL_0000065	Response eQTL	-0.31312	Cell Proliferation On Day 52; Treated With Rotenone	Ependymal-like 1	GNL3	1	chr3:52532998-52532999	1.23907e-06	0.06457	Jerber2021NG	Jerber-2021-Nat. Genet	rs12489828
10.1038/s41588-021-00801-6	CL_0000065	Response eQTL	-0.31312	Cell Proliferation On Day 52; Treated With Rotenone	Ependymal-like 1	GNL3	1	chr3:52532898-52532899	1.23907e-06	0.06457	Jerber2021NG	Jerber-2021-Nat. Genet	rs7614981
10.1038/s41588-021-00801-6	CL_0000065	Response eQTL	-0.35139	Cell Proliferation On Day 52; Treated With Rotenone	Ependymal-like 1	GNL3	1	chr3:52532804-52532805	6.77231e-07	0.07073	Jerber2021NG	Jerber-2021-Nat. Genet	rs12489732
10.1038/s41588-021-00801-6	CL_0000065	Response eQTL	-0.29535	Cell Proliferation On Day 52; Treated With Rotenone	Ependymal-like 1	GNL3	1	chr3:52532666-52532667	1.39616e-05	0.06798	Jerber2021NG	Jerber-2021-Nat. Genet	rs7636227
10.1038/s41588-021-00801-6	CL_0000065	Response eQTL	-0.28389	Cell Proliferation On Day 52; Treated With Rotenone	Ependymal-like 1	GNL3	1	chr3:52532049-52532050	2.41824e-05	0.06724	Jerber2021NG	Jerber-2021-Nat. Genet	rs4282054
10.1038/s41588-021-00801-6	CL_0000065	Response eQTL	-0.28009	Cell Proliferation On Day 52; Treated With Rotenone	Ependymal-like 1	GNL3	1	chr3:52531084-52531085	5.78137e-05	0.06965	Jerber2021NG	Jerber-2021-Nat. Genet	rs6778735
10.1038/s41588-021-00801-6	CL_0000065	Response eQTL	-0.39371	Cell Proliferation On Day 52; Treated With Rotenone	Ependymal-like 1	GNL3	1	chr3:52529702-52529703	9.76286e-09	0.06865	Jerber2021NG	Jerber-2021-Nat. Genet	rs4687625
10.1038/s41588-021-00801-6	CL_0000065	Response eQTL	-0.39466	Cell Proliferation On Day 52; Treated With Rotenone	Ependymal-like 1	GNL3	1	chr3:52529556-52529557	1.42963e-08	0.06961	Jerber2021NG	Jerber-2021-Nat. Genet	rs4687624
10.1038/s41588-021-00801-6	CL_0000065	Response eQTL	-0.39383	Cell Proliferation On Day 52; Treated With Rotenone	Ependymal-like 1	GNL3	1	chr3:52527763-52527764	3.15304e-09	0.06649	Jerber2021NG	Jerber-2021-Nat. Genet	rs11711421
10.1038/s41588-021-00801-6	CL_0000065	Response eQTL	-0.39371	Cell Proliferation On Day 52; Treated With Rotenone	Ependymal-like 1	GNL3	1	chr3:52526005-52526006	9.76286e-09	0.06865	Jerber2021NG	Jerber-2021-Nat. Genet	rs4475032
10.1038/s41588-021-00801-6	CL_0000065	Response eQTL	-0.28389	Cell Proliferation On Day 52; Treated With Rotenone	Ependymal-like 1	GNL3	1	chr3:52525689-52525690	2.41824e-05	0.06724	Jerber2021NG	Jerber-2021-Nat. Genet	rs11709284
10.1038/s41588-021-00801-6	CL_0000065	Response eQTL	-0.39371	Cell Proliferation On Day 52; Treated With Rotenone	Ependymal-like 1	GNL3	1	chr3:52524888-52524889	9.76286e-09	0.06865	Jerber2021NG	Jerber-2021-Nat. Genet	rs34005367
10.1038/s41588-021-00801-6	CL_0000065	Response eQTL	-0.39383	Cell Proliferation On Day 52; Treated With Rotenone	Ependymal-like 1	GNL3	1	chr3:52524117-52524118	3.15304e-09	0.06649	Jerber2021NG	Jerber-2021-Nat. Genet	rs13621
10.1038/s41588-021-00801-6	CL_0000065	Response eQTL	-0.28389	Cell Proliferation On Day 52; Treated With Rotenone	Ependymal-like 1	GNL3	1	chr3:52523992-52523993	2.41824e-05	0.06724	Jerber2021NG	Jerber-2021-Nat. Genet	rs13303
10.1038/s41588-021-00801-6	CL_0000065	Response eQTL	-0.39371	Cell Proliferation On Day 52; Treated With Rotenone	Ependymal-like 1	GNL3	1	chr3:52523022-52523023	9.76286e-09	0.06865	Jerber2021NG	Jerber-2021-Nat. Genet	rs4234633
10.1038/s41588-021-00801-6	CL_0000065	Response eQTL	-0.41375	Cell Proliferation On Day 52; Treated With Rotenone	Ependymal-like 1	GNL3	1	chr3:52522874-52522875	1.97398e-09	0.06896	Jerber2021NG	Jerber-2021-Nat. Genet	rs4434138
10.1038/s41588-021-00801-6	CL_0000065	Response eQTL	-0.28389	Cell Proliferation On Day 52; Treated With Rotenone	Ependymal-like 1	GNL3	1	chr3:52521941-52521942	2.41824e-05	0.06724	Jerber2021NG	Jerber-2021-Nat. Genet	rs9853056
10.1038/s41588-021-00801-6	CL_0000065	Response eQTL	-0.28389	Cell Proliferation On Day 52; Treated With Rotenone	Ependymal-like 1	GNL3	1	chr3:52521300-52521301	2.41824e-05	0.06724	Jerber2021NG	Jerber-2021-Nat. Genet	rs13081028
10.1038/s41588-021-00801-6	CL_0000065	Response eQTL	-0.28389	Cell Proliferation On Day 52; Treated With Rotenone	Ependymal-like 1	GNL3	1	chr3:52517268-52517269	2.41824e-05	0.06724	Jerber2021NG	Jerber-2021-Nat. Genet	rs67409736
10.1038/s41588-021-00801-6	CL_0000065	Response eQTL	-0.28009	Cell Proliferation On Day 52; Treated With Rotenone	Ependymal-like 1	GNL3	1	chr3:52517249-52517250	5.78137e-05	0.06965	Jerber2021NG	Jerber-2021-Nat. Genet	rs66824127
10.1038/s41588-021-00801-6	CL_0000065	Response eQTL	-0.39371	Cell Proliferation On Day 52; Treated With Rotenone	Ependymal-like 1	GNL3	1	chr3:52512804-52512805	9.76286e-09	0.06865	Jerber2021NG	Jerber-2021-Nat. Genet	rs2015971
10.1038/s41588-021-00801-6	CL_0000065	Response eQTL	0.30061	Cell Proliferation On Day 52; Treated With Rotenone	Ependymal-like 1	GNL3	1	chr3:52508903-52508904	5.47338e-06	0.06613	Jerber2021NG	Jerber-2021-Nat. Genet	rs1010554
10.1038/s41588-021-00801-6	CL_0000065	Response eQTL	0.29129	Cell Proliferation On Day 52; Treated With Rotenone	Ependymal-like 1	GNL3	1	chr3:52507237-52507238	1.31792e-05	0.06685	Jerber2021NG	Jerber-2021-Nat. Genet	rs11130306
10.1038/s41588-021-00801-6	CL_0000065	Response eQTL	0.29129	Cell Proliferation On Day 52; Treated With Rotenone	Ependymal-like 1	GNL3	1	chr3:52506757-52506758	1.31792e-05	0.06685	Jerber2021NG	Jerber-2021-Nat. Genet	rs1010553
10.1038/s41588-021-00801-6	CL_0000065	Response eQTL	-0.35139	Cell Proliferation On Day 52; Treated With Rotenone	Ependymal-like 1	GNL3	1	chr3:52506528-52506529	6.77231e-07	0.07073	Jerber2021NG	Jerber-2021-Nat. Genet	rs1010552
10.1038/s41588-021-00801-6	CL_0000065	Response eQTL	-0.36792	Cell Proliferation On Day 52; Treated With Rotenone	Ependymal-like 1	GNL3	1	chr3:52502498-52502499	3.10135e-07	0.0719	Jerber2021NG	Jerber-2021-Nat. Genet	rs731831
10.1038/s41588-021-00801-6	CL_0000065	Response eQTL	-0.27675	Cell Proliferation On Day 52; Treated With Rotenone	Ependymal-like 1	GNL3	0	chr3:52498275-52498276	1.98551e-05	0.06487	Jerber2021NG	Jerber-2021-Nat. Genet	rs34736619
10.1038/s41588-021-00801-6	CL_0000065	Response eQTL	-0.26101	Cell Proliferation On Day 52; Treated With Rotenone	Ependymal-like 1	GNL3	1	chr3:52473703-52473704	7.59882e-05	0.06597	Jerber2021NG	Jerber-2021-Nat. Genet	rs13094915
10.1038/s41588-021-00801-6	CL_0000065	Response eQTL	0.3043	Cell Proliferation On Day 52; Treated With Rotenone	Ependymal-like 1	GNL3	1	chr3:52433247-52433248	8.32027e-06	0.06828	Jerber2021NG	Jerber-2021-Nat. Genet	rs648514
10.1038/s41588-021-00801-6	CL_0000065	Response eQTL	-0.29359	Cell Proliferation On Day 52; Treated With Rotenone	Ependymal-like 1	GNL3	1	chr3:52422957-52422958	5.80677e-05	0.07302	Jerber2021NG	Jerber-2021-Nat. Genet	rs2272088
10.1038/s41588-021-00801-6	CL_0000065	Response eQTL	-0.29359	Cell Proliferation On Day 52; Treated With Rotenone	Ependymal-like 1	GNL3	1	chr3:52416027-52416028	5.80677e-05	0.07302	Jerber2021NG	Jerber-2021-Nat. Genet	rs13094687
10.1038/s41588-021-00801-6	CL_0000065	Response eQTL	-0.30184	Cell Proliferation On Day 52; Treated With Rotenone	Ependymal-like 1	GNL3	1	chr3:52373025-52373026	3.44363e-05	0.07287	Jerber2021NG	Jerber-2021-Nat. Genet	rs1546737
10.1038/s41588-021-00801-6	CL_0000065	Response eQTL	-0.29649	Cell Proliferation On Day 52; Treated With Rotenone	Ependymal-like 1	GNL3	1	chr3:52315396-52315397	5.34292e-05	0.07339	Jerber2021NG	Jerber-2021-Nat. Genet	rs3852064
10.1038/s41588-021-00801-6	CL_0000065	Response eQTL	-0.29649	Cell Proliferation On Day 52; Treated With Rotenone	Ependymal-like 1	GNL3	1	chr3:52315188-52315189	5.34292e-05	0.07339	Jerber2021NG	Jerber-2021-Nat. Genet	rs3852063
10.1038/s41588-021-00801-6	CL_0000065	Response eQTL	-0.29649	Cell Proliferation On Day 52; Treated With Rotenone	Ependymal-like 1	GNL3	1	chr3:52307199-52307200	5.34292e-05	0.07339	Jerber2021NG	Jerber-2021-Nat. Genet	rs3844291
10.1038/s41588-021-00801-6	CL_0000065	Response eQTL	-0.32831	Cell Proliferation On Day 52; Treated With Rotenone	Ependymal-like 1	GNL3	1	chr3:52304836-52304837	6.58523e-06	0.07285	Jerber2021NG	Jerber-2021-Nat. Genet	rs9311474
10.1038/s41588-021-00801-6	CL_0000065	Response eQTL	-0.32831	Cell Proliferation On Day 52; Treated With Rotenone	Ependymal-like 1	GNL3	1	chr3:52299655-52299656	6.58523e-06	0.07285	Jerber2021NG	Jerber-2021-Nat. Genet	rs7622851
10.1038/s41588-021-00801-6	CL_0000065	Response eQTL	-0.32831	Cell Proliferation On Day 52; Treated With Rotenone	Ependymal-like 1	GNL3	1	chr3:52291743-52291744	6.58523e-06	0.07285	Jerber2021NG	Jerber-2021-Nat. Genet	rs2276834
10.1038/s41588-021-00801-6	CL_0000065	Response eQTL	-0.29649	Cell Proliferation On Day 52; Treated With Rotenone	Ependymal-like 1	GNL3	1	chr3:52288781-52288782	5.34292e-05	0.07339	Jerber2021NG	Jerber-2021-Nat. Genet	rs34228726
10.1038/s41588-021-00801-6	CL_0000065	Response eQTL	-0.29649	Cell Proliferation On Day 52; Treated With Rotenone	Ependymal-like 1	GNL3	1	chr3:52288401-52288402	5.34292e-05	0.07339	Jerber2021NG	Jerber-2021-Nat. Genet	rs57615517
10.1038/s41588-021-00801-6	CL_0000065	Response eQTL	-0.32831	Cell Proliferation On Day 52; Treated With Rotenone	Ependymal-like 1	GNL3	1	chr3:52274829-52274830	6.58523e-06	0.07285	Jerber2021NG	Jerber-2021-Nat. Genet	rs6445358
10.1038/s41588-021-00801-6	CL_0000065	Response eQTL	-0.29649	Cell Proliferation On Day 52; Treated With Rotenone	Ependymal-like 1	GNL3	1	chr3:52273153-52273154	5.34292e-05	0.07339	Jerber2021NG	Jerber-2021-Nat. Genet	rs59565798
10.1038/s41588-021-00801-6	CL_0000065	Response eQTL	-0.32831	Cell Proliferation On Day 52; Treated With Rotenone	Ependymal-like 1	GNL3	1	chr3:52271617-52271618	6.58523e-06	0.07285	Jerber2021NG	Jerber-2021-Nat. Genet	rs7629072
10.1038/s41588-021-00801-6	CL_0000065	Response eQTL	-0.32831	Cell Proliferation On Day 52; Treated With Rotenone	Ependymal-like 1	GNL3	1	chr3:52261879-52261880	6.58523e-06	0.07285	Jerber2021NG	Jerber-2021-Nat. Genet	rs7614727
10.1038/s41588-021-00801-6	CL_0000065	Response eQTL	-0.32831	Cell Proliferation On Day 52; Treated With Rotenone	Ependymal-like 1	GNL3	1	chr3:52254929-52254930	6.58523e-06	0.07285	Jerber2021NG	Jerber-2021-Nat. Genet	rs1060330
10.1038/s41588-021-00801-6	CL_0000065	Response eQTL	-0.32853	Cell Proliferation On Day 52; Treated With Rotenone	Ependymal-like 1	GNL3	1	chr3:52253452-52253453	6.53069e-06	0.07287	Jerber2021NG	Jerber-2021-Nat. Genet	rs11717383
10.1038/s41588-021-00801-6	CL_0000065	Response eQTL	-0.29649	Cell Proliferation On Day 52; Treated With Rotenone	Ependymal-like 1	GNL3	1	chr3:52253277-52253278	5.34292e-05	0.07339	Jerber2021NG	Jerber-2021-Nat. Genet	rs34569561
10.1038/s41588-021-00801-6	CL_0000065	Response eQTL	-0.29649	Cell Proliferation On Day 52; Treated With Rotenone	Ependymal-like 1	GNL3	1	chr3:52245578-52245579	5.34292e-05	0.07339	Jerber2021NG	Jerber-2021-Nat. Genet	rs7618915
10.1038/s41588-021-00801-6	CL_0000065	Response eQTL	-0.29649	Cell Proliferation On Day 52; Treated With Rotenone	Ependymal-like 1	GNL3	0	chr3:52243429-52243430	5.34292e-05	0.07339	Jerber2021NG	Jerber-2021-Nat. Genet	rs57630131
10.1038/s41588-021-00801-6	CL_0000065	Response eQTL	0.3273	Cell Proliferation On Day 52; Treated With Rotenone	Ependymal-like 1	GNL3	1	chr3:52239405-52239406	7.70647e-06	0.07317	Jerber2021NG	Jerber-2021-Nat. Genet	rs610060
10.1038/s41588-021-00801-6	CL_0000065	Response eQTL	0.28293	Cell Proliferation On Day 52; Treated With Rotenone	Ependymal-like 1	GNL3	1	chr3:52234850-52234851	1.45237e-04	0.07447	Jerber2021NG	Jerber-2021-Nat. Genet	rs353547
10.1038/s41588-021-00801-6	CL_0000065	Response eQTL	-0.30028	Cell Proliferation On Day 52; Treated With Rotenone	Ependymal-like 1	GNL3	1	chr3:52233716-52233717	4.19389e-05	0.0733	Jerber2021NG	Jerber-2021-Nat. Genet	rs2267847
10.1038/s41588-021-00801-6	CL_0000065	Response eQTL	-0.27136	Cell Proliferation On Day 52; Treated With Rotenone	Ependymal-like 1	GNL3	1	chr3:52227015-52227016	2.11618e-04	0.07325	Jerber2021NG	Jerber-2021-Nat. Genet	rs187084
10.1038/s41588-021-00801-6	CL_0000065	Response eQTL	-0.31392	Cell Proliferation On Day 52; Treated With Rotenone	Ependymal-like 1	GNL3	1	chr3:52224356-52224357	7.42296e-06	0.07005	Jerber2021NG	Jerber-2021-Nat. Genet	rs352139
10.1038/s41588-021-00801-6	CL_0000065	Response eQTL	-0.30563	Cell Proliferation On Day 52; Treated With Rotenone	Ependymal-like 1	GNL3	1	chr3:52222681-52222682	2.24424e-05	0.0721	Jerber2021NG	Jerber-2021-Nat. Genet	rs352140
10.1038/s41588-021-00801-6	CL_0000065	Response eQTL	-0.30871	Cell Proliferation On Day 52; Treated With Rotenone	Ependymal-like 1	GNL3	1	chr3:52218953-52218954	9.58797e-06	0.06975	Jerber2021NG	Jerber-2021-Nat. Genet	rs352162
10.1038/s41588-021-00801-6	CL_0000065	Response eQTL	-0.2871	Cell Proliferation On Day 52; Treated With Rotenone	Ependymal-like 1	GNL3	1	chr3:52213298-52213299	7.07459e-05	0.07225	Jerber2021NG	Jerber-2021-Nat. Genet	rs164640
10.1038/s41588-021-00801-6	CL_0000065	Response eQTL	-0.2871	Cell Proliferation On Day 52; Treated With Rotenone	Ependymal-like 1	GNL3	1	chr3:52213094-52213095	7.07459e-05	0.07225	Jerber2021NG	Jerber-2021-Nat. Genet	rs352163
10.1038/s41588-021-00801-6	CL_0000065	Response eQTL	-0.32286	Cell Proliferation On Day 52; Treated With Rotenone	Ependymal-like 1	GNL3	1	chr3:52210035-52210036	7.30317e-06	0.07199	Jerber2021NG	Jerber-2021-Nat. Genet	rs11712164
10.1038/s41588-021-00801-6	CL_0000065	Response eQTL	-0.27903	Cell Proliferation On Day 52; Treated With Rotenone	Ependymal-like 1	GNL3	1	chr3:52208886-52208887	9.20967e-05	0.07135	Jerber2021NG	Jerber-2021-Nat. Genet	rs352165
10.1038/s41588-021-00801-6	CL_0000065	Response eQTL	-0.32917	Cell Proliferation On Day 52; Treated With Rotenone	Ependymal-like 1	GNL3	1	chr3:52207819-52207820	1.94646e-05	0.07707	Jerber2021NG	Jerber-2021-Nat. Genet	rs6802320
10.1038/s41588-021-00801-6	CL_0000065	Response eQTL	-0.27903	Cell Proliferation On Day 52; Treated With Rotenone	Ependymal-like 1	GNL3	1	chr3:52204661-52204662	9.20967e-05	0.07135	Jerber2021NG	Jerber-2021-Nat. Genet	rs352166
10.1038/s41588-021-00801-6	CL_0000065	Response eQTL	-0.27903	Cell Proliferation On Day 52; Treated With Rotenone	Ependymal-like 1	GNL3	1	chr3:52204640-52204641	9.20967e-05	0.07135	Jerber2021NG	Jerber-2021-Nat. Genet	rs352167
10.1038/s41588-021-00801-6	CL_0000065	Response eQTL	-0.2879	Cell Proliferation On Day 52; Treated With Rotenone	Ependymal-like 1	GNL3	1	chr3:52203954-52203955	6.08542e-05	0.07181	Jerber2021NG	Jerber-2021-Nat. Genet	rs352168
10.1038/s41588-021-00801-6	CL_0000065	Response eQTL	-0.2879	Cell Proliferation On Day 52; Treated With Rotenone	Ependymal-like 1	GNL3	1	chr3:52202746-52202747	6.08542e-05	0.07181	Jerber2021NG	Jerber-2021-Nat. Genet	rs352169
10.1038/s41588-021-00801-6	CL_0000065	Response eQTL	-0.2879	Cell Proliferation On Day 52; Treated With Rotenone	Ependymal-like 1	GNL3	1	chr3:52202061-52202062	6.08542e-05	0.07181	Jerber2021NG	Jerber-2021-Nat. Genet	rs352170
10.1038/s41588-021-00801-6	CL_0000065	Response eQTL	-0.2879	Cell Proliferation On Day 52; Treated With Rotenone	Ependymal-like 1	GNL3	1	chr3:52200187-52200188	6.08542e-05	0.07181	Jerber2021NG	Jerber-2021-Nat. Genet	rs352171
10.1038/s41588-021-00801-6	CL_0000065	Response eQTL	-0.27903	Cell Proliferation On Day 52; Treated With Rotenone	Ependymal-like 1	GNL3	1	chr3:52199845-52199846	9.20967e-05	0.07135	Jerber2021NG	Jerber-2021-Nat. Genet	rs181274
10.1038/s41588-021-00801-6	CL_0000065	Response eQTL	-0.27903	Cell Proliferation On Day 52; Treated With Rotenone	Ependymal-like 1	GNL3	1	chr3:52196459-52196460	9.20967e-05	0.07135	Jerber2021NG	Jerber-2021-Nat. Genet	rs104903
10.1038/s41588-021-00801-6	CL_0000065	Response eQTL	-0.27025	Cell Proliferation On Day 52; Treated With Rotenone	Ependymal-like 1	GNL3	1	chr3:52194480-52194481	1.13494e-04	0.07002	Jerber2021NG	Jerber-2021-Nat. Genet	rs524986
10.1038/s41588-021-00801-6	CL_0000065	Response eQTL	-0.287	Cell Proliferation On Day 52; Treated With Rotenone	Ependymal-like 1	GNL3	1	chr3:52194134-52194135	5.88542e-05	0.07144	Jerber2021NG	Jerber-2021-Nat. Genet	rs411457
10.1038/s41588-021-00801-6	CL_0000065	Response eQTL	-0.287	Cell Proliferation On Day 52; Treated With Rotenone	Ependymal-like 1	GNL3	1	chr3:52187833-52187834	5.88542e-05	0.07144	Jerber2021NG	Jerber-2021-Nat. Genet	rs352161
10.1038/s41588-021-00801-6	CL_0000065	Response eQTL	-0.27025	Cell Proliferation On Day 52; Treated With Rotenone	Ependymal-like 1	GNL3	1	chr3:52186187-52186188	1.13494e-04	0.07002	Jerber2021NG	Jerber-2021-Nat. Genet	rs614288
10.1038/s41588-021-00801-6	CL_0000065	Response eQTL	-0.287	Cell Proliferation On Day 52; Treated With Rotenone	Ependymal-like 1	GNL3	1	chr3:52183688-52183689	5.88542e-05	0.07144	Jerber2021NG	Jerber-2021-Nat. Genet	rs352158
10.1038/s41588-021-00801-6	CL_0000065	Response eQTL	-0.29573	Cell Proliferation On Day 52; Treated With Rotenone	Ependymal-like 1	GNL3	1	chr3:52183072-52183073	2.84961e-05	0.07066	Jerber2021NG	Jerber-2021-Nat. Genet	rs353551
10.1038/s41588-021-00801-6	CL_0000700	Cell-type-specific eQTL	-0.28471	Cell Proliferation On Day 52	Dopaminergic Neurons	GNL3	1	chr3:53194326-53194327	2.74475e-06	0.06072	Jerber2021NG	Jerber-2021-Nat. Genet	rs729396
10.1038/s41588-021-00801-6	CL_0000700	Cell-type-specific eQTL	-0.20022	Cell Proliferation On Day 52	Dopaminergic Neurons	GNL3	1	chr3:53193412-53193413	4.72496e-04	0.05727	Jerber2021NG	Jerber-2021-Nat. Genet	rs7643235
10.1038/s41588-021-00801-6	CL_0000700	Cell-type-specific eQTL	0.26616	Cell Proliferation On Day 52	Dopaminergic Neurons	GNL3	0	chr3:53191367-53191368	2.93090e-04	0.0735	Jerber2021NG	Jerber-2021-Nat. Genet	rs9847580
10.1038/s41588-021-00801-6	CL_0000700	Cell-type-specific eQTL	-0.23349	Cell Proliferation On Day 52	Dopaminergic Neurons	GNL3	0	chr3:53181859-53181860	6.99440e-05	0.05872	Jerber2021NG	Jerber-2021-Nat. Genet	rs11130350
10.1038/s41588-021-00801-6	CL_0000700	Cell-type-specific eQTL	-0.29851	Cell Proliferation On Day 52	Dopaminergic Neurons	GNL3	1	chr3:53179954-53179955	4.80404e-06	0.06527	Jerber2021NG	Jerber-2021-Nat. Genet	rs11130349
10.1038/s41588-021-00801-6	CL_0000700	Cell-type-specific eQTL	0.2457	Cell Proliferation On Day 52	Dopaminergic Neurons	GNL3	0	chr3:53179641-53179642	4.92032e-04	0.0705	Jerber2021NG	Jerber-2021-Nat. Genet	rs2230493
10.1038/s41588-021-00801-6	CL_0000700	Cell-type-specific eQTL	0.2457	Cell Proliferation On Day 52	Dopaminergic Neurons	GNL3	0	chr3:53178700-53178701	4.92032e-04	0.0705	Jerber2021NG	Jerber-2021-Nat. Genet	rs17052826
10.1038/s41588-021-00801-6	CL_0000700	Cell-type-specific eQTL	-0.24317	Cell Proliferation On Day 52	Dopaminergic Neurons	GNL3	0	chr3:53178558-53178559	4.06408e-05	0.05926	Jerber2021NG	Jerber-2021-Nat. Genet	rs2306571
10.1038/s41588-021-00801-6	CL_0000700	Cell-type-specific eQTL	0.2457	Cell Proliferation On Day 52	Dopaminergic Neurons	GNL3	0	chr3:53178367-53178368	4.92032e-04	0.0705	Jerber2021NG	Jerber-2021-Nat. Genet	rs2306570
10.1038/s41588-021-00801-6	CL_0000700	Cell-type-specific eQTL	0.2457	Cell Proliferation On Day 52	Dopaminergic Neurons	GNL3	0	chr3:53178196-53178197	4.92032e-04	0.0705	Jerber2021NG	Jerber-2021-Nat. Genet	rs112724859
10.1038/s41588-021-00801-6	CL_0000700	Cell-type-specific eQTL	-0.23428	Cell Proliferation On Day 52	Dopaminergic Neurons	GNL3	0	chr3:53175484-53175485	6.75134e-05	0.05879	Jerber2021NG	Jerber-2021-Nat. Genet	rs1872035
10.1038/s41588-021-00801-6	CL_0000700	Cell-type-specific eQTL	0.2457	Cell Proliferation On Day 52	Dopaminergic Neurons	GNL3	0	chr3:53175422-53175423	4.92032e-04	0.0705	Jerber2021NG	Jerber-2021-Nat. Genet	rs73091435
10.1038/s41588-021-00801-6	CL_0000700	Cell-type-specific eQTL	-0.23428	Cell Proliferation On Day 52	Dopaminergic Neurons	GNL3	0	chr3:53174901-53174902	6.75134e-05	0.05879	Jerber2021NG	Jerber-2021-Nat. Genet	rs3821689
10.1038/s41588-021-00801-6	CL_0000700	Cell-type-specific eQTL	-0.23428	Cell Proliferation On Day 52	Dopaminergic Neurons	GNL3	0	chr3:53174766-53174767	6.75134e-05	0.05879	Jerber2021NG	Jerber-2021-Nat. Genet	rs6778964
10.1038/s41588-021-00801-6	CL_0000700	Cell-type-specific eQTL	-0.23428	Cell Proliferation On Day 52	Dopaminergic Neurons	GNL3	0	chr3:53173729-53173730	6.75134e-05	0.05879	Jerber2021NG	Jerber-2021-Nat. Genet	rs3773723
10.1038/s41588-021-00801-6	CL_0000700	Cell-type-specific eQTL	-0.23428	Cell Proliferation On Day 52	Dopaminergic Neurons	GNL3	0	chr3:53173500-53173501	6.75134e-05	0.05879	Jerber2021NG	Jerber-2021-Nat. Genet	rs3773725
10.1038/s41588-021-00801-6	CL_0000700	Cell-type-specific eQTL	-0.29851	Cell Proliferation On Day 52	Dopaminergic Neurons	GNL3	1	chr3:53173385-53173386	4.80404e-06	0.06527	Jerber2021NG	Jerber-2021-Nat. Genet	rs6764111
10.1038/s41588-021-00801-6	CL_0000700	Cell-type-specific eQTL	-0.23428	Cell Proliferation On Day 52	Dopaminergic Neurons	GNL3	0	chr3:53172570-53172571	6.75134e-05	0.05879	Jerber2021NG	Jerber-2021-Nat. Genet	rs3796256
10.1038/s41588-021-00801-6	CL_0000700	Cell-type-specific eQTL	0.24594	Cell Proliferation On Day 52	Dopaminergic Neurons	GNL3	0	chr3:53172474-53172475	5.45043e-04	0.07113	Jerber2021NG	Jerber-2021-Nat. Genet	rs73091425
10.1038/s41588-021-00801-6	CL_0000700	Cell-type-specific eQTL	-0.23428	Cell Proliferation On Day 52	Dopaminergic Neurons	GNL3	0	chr3:53171118-53171119	6.75134e-05	0.05879	Jerber2021NG	Jerber-2021-Nat. Genet	rs3773728
10.1038/s41588-021-00801-6	CL_0000700	Cell-type-specific eQTL	-0.23428	Cell Proliferation On Day 52	Dopaminergic Neurons	GNL3	0	chr3:53170829-53170830	6.75134e-05	0.05879	Jerber2021NG	Jerber-2021-Nat. Genet	rs3773729
10.1038/s41588-021-00801-6	CL_0000700	Cell-type-specific eQTL	-0.23428	Cell Proliferation On Day 52	Dopaminergic Neurons	GNL3	0	chr3:53170450-53170451	6.75134e-05	0.05879	Jerber2021NG	Jerber-2021-Nat. Genet	rs11130347
10.1038/s41588-021-00801-6	CL_0000700	Cell-type-specific eQTL	0.2457	Cell Proliferation On Day 52	Dopaminergic Neurons	GNL3	0	chr3:53167597-53167598	4.92032e-04	0.0705	Jerber2021NG	Jerber-2021-Nat. Genet	rs73091417
10.1038/s41588-021-00801-6	CL_0000700	Cell-type-specific eQTL	-0.20907	Cell Proliferation On Day 52	Dopaminergic Neurons	GNL3	0	chr3:53162272-53162273	4.32799e-04	0.05941	Jerber2021NG	Jerber-2021-Nat. Genet	rs9311489
10.1038/s41588-021-00801-6	CL_0000700	Cell-type-specific eQTL	-0.3325	Cell Proliferation On Day 52	Dopaminergic Neurons	GNL3	1	chr3:53141001-53141002	1.16002e-07	0.06274	Jerber2021NG	Jerber-2021-Nat. Genet	rs1080500
10.1038/s41588-021-00801-6	CL_0000700	Cell-type-specific eQTL	-0.30459	Cell Proliferation On Day 52	Dopaminergic Neurons	GNL3	1	chr3:53126344-53126345	5.21896e-07	0.0607	Jerber2021NG	Jerber-2021-Nat. Genet	rs11713763
10.1038/s41588-021-00801-6	CL_0000700	Cell-type-specific eQTL	0.24136	Cell Proliferation On Day 52	Dopaminergic Neurons	GNL3	1	chr3:53108964-53108965	7.14820e-05	0.06078	Jerber2021NG	Jerber-2021-Nat. Genet	rs2115780
10.1038/s41588-021-00801-6	CL_0000700	Cell-type-specific eQTL	0.24509	Cell Proliferation On Day 52	Dopaminergic Neurons	GNL3	1	chr3:53067764-53067765	5.24274e-05	0.0606	Jerber2021NG	Jerber-2021-Nat. Genet	rs2581790
10.1038/s41588-021-00801-6	CL_0000700	Cell-type-specific eQTL	-0.26314	Cell Proliferation On Day 52	Dopaminergic Neurons	GNL3	1	chr3:53067564-53067565	1.80856e-05	0.06138	Jerber2021NG	Jerber-2021-Nat. Genet	rs6799185
10.1038/s41588-021-00801-6	CL_0000700	Cell-type-specific eQTL	0.24957	Cell Proliferation On Day 52	Dopaminergic Neurons	GNL3	1	chr3:53062214-53062215	4.39636e-05	0.06109	Jerber2021NG	Jerber-2021-Nat. Genet	rs2581789
10.1038/s41588-021-00801-6	CL_0000700	Cell-type-specific eQTL	0.24957	Cell Proliferation On Day 52	Dopaminergic Neurons	GNL3	1	chr3:53062031-53062032	4.39636e-05	0.06109	Jerber2021NG	Jerber-2021-Nat. Genet	rs11915851
10.1038/s41588-021-00801-6	CL_0000700	Cell-type-specific eQTL	0.24957	Cell Proliferation On Day 52	Dopaminergic Neurons	GNL3	1	chr3:53061863-53061864	4.39636e-05	0.06109	Jerber2021NG	Jerber-2021-Nat. Genet	rs11923572
10.1038/s41588-021-00801-6	CL_0000700	Cell-type-specific eQTL	0.23597	Cell Proliferation On Day 52	Dopaminergic Neurons	GNL3	1	chr3:53060178-53060179	1.57117e-04	0.06243	Jerber2021NG	Jerber-2021-Nat. Genet	rs11712910
10.1038/s41588-021-00801-6	CL_0000700	Cell-type-specific eQTL	0.23597	Cell Proliferation On Day 52	Dopaminergic Neurons	GNL3	0	chr3:53057939-53057940	1.57117e-04	0.06243	Jerber2021NG	Jerber-2021-Nat. Genet	rs12632259
10.1038/s41588-021-00801-6	CL_0000700	Cell-type-specific eQTL	0.23507	Cell Proliferation On Day 52	Dopaminergic Neurons	GNL3	1	chr3:53057836-53057837	1.07203e-04	0.06068	Jerber2021NG	Jerber-2021-Nat. Genet	rs12632240
10.1038/s41588-021-00801-6	CL_0000700	Cell-type-specific eQTL	0.2362	Cell Proliferation On Day 52	Dopaminergic Neurons	GNL3	1	chr3:53057148-53057149	9.99376e-05	0.06071	Jerber2021NG	Jerber-2021-Nat. Genet	rs7625909
10.1038/s41588-021-00801-6	CL_0000700	Cell-type-specific eQTL	0.2362	Cell Proliferation On Day 52	Dopaminergic Neurons	GNL3	1	chr3:53057062-53057063	9.99376e-05	0.06071	Jerber2021NG	Jerber-2021-Nat. Genet	rs7647313
10.1038/s41588-021-00801-6	CL_0000700	Cell-type-specific eQTL	0.24584	Cell Proliferation On Day 52	Dopaminergic Neurons	GNL3	1	chr3:53055667-53055668	4.94132e-05	0.06058	Jerber2021NG	Jerber-2021-Nat. Genet	rs2581809
10.1038/s41588-021-00801-6	CL_0000700	Cell-type-specific eQTL	0.24584	Cell Proliferation On Day 52	Dopaminergic Neurons	GNL3	1	chr3:53055429-53055430	4.94132e-05	0.06058	Jerber2021NG	Jerber-2021-Nat. Genet	rs2581808
10.1038/s41588-021-00801-6	CL_0000700	Cell-type-specific eQTL	0.24584	Cell Proliferation On Day 52	Dopaminergic Neurons	GNL3	1	chr3:53054774-53054775	4.94132e-05	0.06058	Jerber2021NG	Jerber-2021-Nat. Genet	rs11923593
10.1038/s41588-021-00801-6	CL_0000700	Cell-type-specific eQTL	0.24584	Cell Proliferation On Day 52	Dopaminergic Neurons	GNL3	1	chr3:53051785-53051786	4.94132e-05	0.06058	Jerber2021NG	Jerber-2021-Nat. Genet	rs2581811
10.1038/s41588-021-00801-6	CL_0000700	Cell-type-specific eQTL	0.23461	Cell Proliferation On Day 52	Dopaminergic Neurons	GNL3	1	chr3:53051028-53051029	1.59554e-04	0.06214	Jerber2021NG	Jerber-2021-Nat. Genet	rs2581812
10.1038/s41588-021-00801-6	CL_0000700	Cell-type-specific eQTL	0.24584	Cell Proliferation On Day 52	Dopaminergic Neurons	GNL3	1	chr3:53049827-53049828	4.94132e-05	0.06058	Jerber2021NG	Jerber-2021-Nat. Genet	rs7617501
10.1038/s41588-021-00801-6	CL_0000700	Cell-type-specific eQTL	0.24584	Cell Proliferation On Day 52	Dopaminergic Neurons	GNL3	1	chr3:53049787-53049788	4.94132e-05	0.06058	Jerber2021NG	Jerber-2021-Nat. Genet	rs7647960
10.1038/s41588-021-00801-6	CL_0000700	Cell-type-specific eQTL	0.24584	Cell Proliferation On Day 52	Dopaminergic Neurons	GNL3	1	chr3:53043790-53043791	4.94132e-05	0.06058	Jerber2021NG	Jerber-2021-Nat. Genet	rs7613013
10.1038/s41588-021-00801-6	CL_0000700	Cell-type-specific eQTL	0.24584	Cell Proliferation On Day 52	Dopaminergic Neurons	GNL3	1	chr3:53042739-53042740	4.94132e-05	0.06058	Jerber2021NG	Jerber-2021-Nat. Genet	rs9818819
10.1038/s41588-021-00801-6	CL_0000700	Cell-type-specific eQTL	0.24584	Cell Proliferation On Day 52	Dopaminergic Neurons	GNL3	1	chr3:53037636-53037637	4.94132e-05	0.06058	Jerber2021NG	Jerber-2021-Nat. Genet	rs2581818
10.1038/s41588-021-00801-6	CL_0000700	Cell-type-specific eQTL	0.25344	Cell Proliferation On Day 52	Dopaminergic Neurons	GNL3	1	chr3:53029344-53029345	2.67088e-05	0.06034	Jerber2021NG	Jerber-2021-Nat. Genet	rs2581806
10.1038/s41588-021-00801-6	CL_0000700	Cell-type-specific eQTL	0.24634	Cell Proliferation On Day 52	Dopaminergic Neurons	GNL3	1	chr3:53026433-53026434	1.13721e-04	0.06383	Jerber2021NG	Jerber-2021-Nat. Genet	rs2564951
10.1038/s41588-021-00801-6	CL_0000700	Cell-type-specific eQTL	0.25344	Cell Proliferation On Day 52	Dopaminergic Neurons	GNL3	1	chr3:53021826-53021827	2.67088e-05	0.06034	Jerber2021NG	Jerber-2021-Nat. Genet	rs2244461
10.1038/s41588-021-00801-6	CL_0000700	Cell-type-specific eQTL	0.25344	Cell Proliferation On Day 52	Dopaminergic Neurons	GNL3	1	chr3:53020711-53020712	2.67088e-05	0.06034	Jerber2021NG	Jerber-2021-Nat. Genet	rs2581777
10.1038/s41588-021-00801-6	CL_0000700	Cell-type-specific eQTL	0.25344	Cell Proliferation On Day 52	Dopaminergic Neurons	GNL3	1	chr3:53020218-53020219	2.67088e-05	0.06034	Jerber2021NG	Jerber-2021-Nat. Genet	rs2581776
10.1038/s41588-021-00801-6	CL_0000700	Cell-type-specific eQTL	0.20223	Cell Proliferation On Day 52	Dopaminergic Neurons	GNL3	0	chr3:53004770-53004771	5.09937e-04	0.05819	Jerber2021NG	Jerber-2021-Nat. Genet	rs2581795
10.1038/s41588-021-00801-6	CL_0000700	Cell-type-specific eQTL	0.20638	Cell Proliferation On Day 52	Dopaminergic Neurons	GNL3	0	chr3:53004102-53004103	3.72806e-04	0.05799	Jerber2021NG	Jerber-2021-Nat. Genet	rs2564964
10.1038/s41588-021-00801-6	CL_0000700	Cell-type-specific eQTL	0.20252	Cell Proliferation On Day 52	Dopaminergic Neurons	GNL3	0	chr3:52999780-52999781	4.43510e-04	0.05765	Jerber2021NG	Jerber-2021-Nat. Genet	rs12635298
10.1038/s41588-021-00801-6	CL_0000700	Cell-type-specific eQTL	0.20638	Cell Proliferation On Day 52	Dopaminergic Neurons	GNL3	0	chr3:52999041-52999042	3.72806e-04	0.05799	Jerber2021NG	Jerber-2021-Nat. Genet	rs2564920
10.1038/s41588-021-00801-6	CL_0000700	Cell-type-specific eQTL	0.20638	Cell Proliferation On Day 52	Dopaminergic Neurons	GNL3	0	chr3:52997896-52997897	3.72806e-04	0.05799	Jerber2021NG	Jerber-2021-Nat. Genet	rs11708675
10.1038/s41588-021-00801-6	CL_0000700	Cell-type-specific eQTL	0.20638	Cell Proliferation On Day 52	Dopaminergic Neurons	GNL3	0	chr3:52997622-52997623	3.72806e-04	0.05799	Jerber2021NG	Jerber-2021-Nat. Genet	rs2564962
10.1038/s41588-021-00801-6	CL_0000700	Cell-type-specific eQTL	0.20638	Cell Proliferation On Day 52	Dopaminergic Neurons	GNL3	1	chr3:52997467-52997468	3.72806e-04	0.05799	Jerber2021NG	Jerber-2021-Nat. Genet	rs2564960
10.1038/s41588-021-00801-6	CL_0000700	Cell-type-specific eQTL	0.20029	Cell Proliferation On Day 52	Dopaminergic Neurons	GNL3	1	chr3:52997024-52997025	5.61219e-04	0.05806	Jerber2021NG	Jerber-2021-Nat. Genet	rs2564957
10.1038/s41588-021-00801-6	CL_0000700	Cell-type-specific eQTL	0.25344	Cell Proliferation On Day 52	Dopaminergic Neurons	GNL3	1	chr3:52989357-52989358	2.67088e-05	0.06034	Jerber2021NG	Jerber-2021-Nat. Genet	rs2564933
10.1038/s41588-021-00801-6	CL_0000700	Cell-type-specific eQTL	0.25344	Cell Proliferation On Day 52	Dopaminergic Neurons	GNL3	1	chr3:52987994-52987995	2.67088e-05	0.06034	Jerber2021NG	Jerber-2021-Nat. Genet	rs2564932
10.1038/s41588-021-00801-6	CL_0000700	Cell-type-specific eQTL	0.25344	Cell Proliferation On Day 52	Dopaminergic Neurons	GNL3	1	chr3:52987733-52987734	2.67088e-05	0.06034	Jerber2021NG	Jerber-2021-Nat. Genet	rs2581822
10.1038/s41588-021-00801-6	CL_0000700	Cell-type-specific eQTL	0.25344	Cell Proliferation On Day 52	Dopaminergic Neurons	GNL3	1	chr3:52987572-52987573	2.67088e-05	0.06034	Jerber2021NG	Jerber-2021-Nat. Genet	rs2581821
10.1038/s41588-021-00801-6	CL_0000700	Cell-type-specific eQTL	0.26545	Cell Proliferation On Day 52	Dopaminergic Neurons	GNL3	1	chr3:52983291-52983292	8.93966e-06	0.05977	Jerber2021NG	Jerber-2021-Nat. Genet	rs2564930
10.1038/s41588-021-00801-6	CL_0000700	Cell-type-specific eQTL	0.25246	Cell Proliferation On Day 52	Dopaminergic Neurons	GNL3	1	chr3:52982536-52982537	2.21688e-05	0.05952	Jerber2021NG	Jerber-2021-Nat. Genet	rs2581819
10.1038/s41588-021-00801-6	CL_0000700	Cell-type-specific eQTL	-0.25246	Cell Proliferation On Day 52	Dopaminergic Neurons	GNL3	1	chr3:52980641-52980642	2.21688e-05	0.05952	Jerber2021NG	Jerber-2021-Nat. Genet	rs2581816
10.1038/s41588-021-00801-6	CL_0000700	Cell-type-specific eQTL	-0.25928	Cell Proliferation On Day 52	Dopaminergic Neurons	GNL3	1	chr3:52975579-52975580	1.44183e-05	0.05978	Jerber2021NG	Jerber-2021-Nat. Genet	rs6801235
10.1038/s41588-021-00801-6	CL_0000700	Cell-type-specific eQTL	-0.25246	Cell Proliferation On Day 52	Dopaminergic Neurons	GNL3	1	chr3:52973787-52973788	2.21688e-05	0.05952	Jerber2021NG	Jerber-2021-Nat. Genet	rs2336672
10.1038/s41588-021-00801-6	CL_0000700	Cell-type-specific eQTL	0.26545	Cell Proliferation On Day 52	Dopaminergic Neurons	GNL3	1	chr3:52969005-52969006	8.93966e-06	0.05977	Jerber2021NG	Jerber-2021-Nat. Genet	rs2245424
10.1038/s41588-021-00801-6	CL_0000700	Cell-type-specific eQTL	0.25928	Cell Proliferation On Day 52	Dopaminergic Neurons	GNL3	1	chr3:52968134-52968135	1.44183e-05	0.05978	Jerber2021NG	Jerber-2021-Nat. Genet	rs9823697
10.1038/s41588-021-00801-6	CL_0000700	Cell-type-specific eQTL	0.25928	Cell Proliferation On Day 52	Dopaminergic Neurons	GNL3	1	chr3:52964488-52964489	1.44183e-05	0.05978	Jerber2021NG	Jerber-2021-Nat. Genet	rs2336670
10.1038/s41588-021-00801-6	CL_0000700	Cell-type-specific eQTL	0.40239	Cell Proliferation On Day 52	Dopaminergic Neurons	GNL3	0	chr3:52962858-52962859	2.89965e-04	0.11103	Jerber2021NG	Jerber-2021-Nat. Genet	rs73087038
10.1038/s41588-021-00801-6	CL_0000700	Cell-type-specific eQTL	0.25928	Cell Proliferation On Day 52	Dopaminergic Neurons	GNL3	1	chr3:52962016-52962017	1.44183e-05	0.05978	Jerber2021NG	Jerber-2021-Nat. Genet	rs4515041
10.1038/s41588-021-00801-6	CL_0000700	Cell-type-specific eQTL	0.25928	Cell Proliferation On Day 52	Dopaminergic Neurons	GNL3	1	chr3:52961428-52961429	1.44183e-05	0.05978	Jerber2021NG	Jerber-2021-Nat. Genet	rs2710326
10.1038/s41588-021-00801-6	CL_0000700	Cell-type-specific eQTL	0.25928	Cell Proliferation On Day 52	Dopaminergic Neurons	GNL3	1	chr3:52960965-52960966	1.44183e-05	0.05978	Jerber2021NG	Jerber-2021-Nat. Genet	rs2581803
10.1038/s41588-021-00801-6	CL_0000700	Cell-type-specific eQTL	0.25928	Cell Proliferation On Day 52	Dopaminergic Neurons	GNL3	1	chr3:52957291-52957292	1.44183e-05	0.05978	Jerber2021NG	Jerber-2021-Nat. Genet	rs2465101
10.1038/s41588-021-00801-6	CL_0000700	Cell-type-specific eQTL	0.25928	Cell Proliferation On Day 52	Dopaminergic Neurons	GNL3	1	chr3:52957173-52957174	1.44183e-05	0.05978	Jerber2021NG	Jerber-2021-Nat. Genet	rs2439434
10.1038/s41588-021-00801-6	CL_0000700	Cell-type-specific eQTL	0.40239	Cell Proliferation On Day 52	Dopaminergic Neurons	GNL3	0	chr3:52953500-52953501	2.89965e-04	0.11103	Jerber2021NG	Jerber-2021-Nat. Genet	rs11719601
10.1038/s41588-021-00801-6	CL_0000700	Cell-type-specific eQTL	0.25344	Cell Proliferation On Day 52	Dopaminergic Neurons	GNL3	1	chr3:52951996-52951997	2.67088e-05	0.06034	Jerber2021NG	Jerber-2021-Nat. Genet	rs36051354
10.1038/s41588-021-00801-6	CL_0000700	Cell-type-specific eQTL	0.23762	Cell Proliferation On Day 52	Dopaminergic Neurons	GNL3	1	chr3:52948280-52948281	1.29018e-04	0.06207	Jerber2021NG	Jerber-2021-Nat. Genet	rs2952830
10.1038/s41588-021-00801-6	CL_0000700	Cell-type-specific eQTL	0.2434	Cell Proliferation On Day 52	Dopaminergic Neurons	GNL3	1	chr3:52944675-52944676	8.63313e-05	0.062	Jerber2021NG	Jerber-2021-Nat. Genet	rs2710332
10.1038/s41588-021-00801-6	CL_0000700	Cell-type-specific eQTL	0.25344	Cell Proliferation On Day 52	Dopaminergic Neurons	GNL3	1	chr3:52944402-52944403	2.67088e-05	0.06034	Jerber2021NG	Jerber-2021-Nat. Genet	rs62253605
10.1038/s41588-021-00801-6	CL_0000700	Cell-type-specific eQTL	0.25928	Cell Proliferation On Day 52	Dopaminergic Neurons	GNL3	1	chr3:52940136-52940137	1.44183e-05	0.05978	Jerber2021NG	Jerber-2021-Nat. Genet	rs2710346
10.1038/s41588-021-00801-6	CL_0000700	Cell-type-specific eQTL	0.25928	Cell Proliferation On Day 52	Dopaminergic Neurons	GNL3	1	chr3:52935513-52935514	1.44183e-05	0.05978	Jerber2021NG	Jerber-2021-Nat. Genet	rs2710313
10.1038/s41588-021-00801-6	CL_0000700	Cell-type-specific eQTL	0.27246	Cell Proliferation On Day 52	Dopaminergic Neurons	GNL3	1	chr3:52935112-52935113	5.64957e-06	0.06002	Jerber2021NG	Jerber-2021-Nat. Genet	rs2710314
10.1038/s41588-021-00801-6	CL_0000700	Cell-type-specific eQTL	0.25928	Cell Proliferation On Day 52	Dopaminergic Neurons	GNL3	1	chr3:52934710-52934711	1.44183e-05	0.05978	Jerber2021NG	Jerber-2021-Nat. Genet	rs2257216
10.1038/s41588-021-00801-6	CL_0000700	Cell-type-specific eQTL	0.25928	Cell Proliferation On Day 52	Dopaminergic Neurons	GNL3	1	chr3:52932542-52932543	1.44183e-05	0.05978	Jerber2021NG	Jerber-2021-Nat. Genet	rs2581827
10.1038/s41588-021-00801-6	CL_0000700	Cell-type-specific eQTL	0.27246	Cell Proliferation On Day 52	Dopaminergic Neurons	GNL3	1	chr3:52931697-52931698	5.64957e-06	0.06002	Jerber2021NG	Jerber-2021-Nat. Genet	rs2710339
10.1038/s41588-021-00801-6	CL_0000700	Cell-type-specific eQTL	0.26022	Cell Proliferation On Day 52	Dopaminergic Neurons	GNL3	1	chr3:52922902-52922903	1.58360e-05	0.06028	Jerber2021NG	Jerber-2021-Nat. Genet	rs11130331
10.1038/s41588-021-00801-6	CL_0000700	Cell-type-specific eQTL	0.25469	Cell Proliferation On Day 52	Dopaminergic Neurons	GNL3	1	chr3:52919828-52919829	2.45520e-05	0.06037	Jerber2021NG	Jerber-2021-Nat. Genet	rs9985365
10.1038/s41588-021-00801-6	CL_0000700	Cell-type-specific eQTL	0.25182	Cell Proliferation On Day 52	Dopaminergic Neurons	GNL3	1	chr3:52919039-52919040	2.76380e-05	0.06007	Jerber2021NG	Jerber-2021-Nat. Genet	rs9880619
10.1038/s41588-021-00801-6	CL_0000700	Cell-type-specific eQTL	0.24785	Cell Proliferation On Day 52	Dopaminergic Neurons	GNL3	1	chr3:52916643-52916644	3.72729e-05	0.0601	Jerber2021NG	Jerber-2021-Nat. Genet	rs12629687
10.1038/s41588-021-00801-6	CL_0000700	Cell-type-specific eQTL	0.26022	Cell Proliferation On Day 52	Dopaminergic Neurons	GNL3	1	chr3:52914658-52914659	1.58360e-05	0.06028	Jerber2021NG	Jerber-2021-Nat. Genet	rs4687689
10.1038/s41588-021-00801-6	CL_0000700	Cell-type-specific eQTL	0.26022	Cell Proliferation On Day 52	Dopaminergic Neurons	GNL3	1	chr3:52914316-52914317	1.58360e-05	0.06028	Jerber2021NG	Jerber-2021-Nat. Genet	rs4687687
10.1038/s41588-021-00801-6	CL_0000700	Cell-type-specific eQTL	0.24785	Cell Proliferation On Day 52	Dopaminergic Neurons	GNL3	1	chr3:52911914-52911915	3.72729e-05	0.0601	Jerber2021NG	Jerber-2021-Nat. Genet	rs9871175
10.1038/s41588-021-00801-6	CL_0000700	Cell-type-specific eQTL	0.26022	Cell Proliferation On Day 52	Dopaminergic Neurons	GNL3	1	chr3:52910708-52910709	1.58360e-05	0.06028	Jerber2021NG	Jerber-2021-Nat. Genet	rs9865248
10.1038/s41588-021-00801-6	CL_0000700	Cell-type-specific eQTL	0.24877	Cell Proliferation On Day 52	Dopaminergic Neurons	GNL3	1	chr3:52904076-52904077	3.62098e-05	0.06023	Jerber2021NG	Jerber-2021-Nat. Genet	rs7626551
10.1038/s41588-021-00801-6	CL_0000700	Cell-type-specific eQTL	0.24877	Cell Proliferation On Day 52	Dopaminergic Neurons	GNL3	1	chr3:52902747-52902748	3.62098e-05	0.06023	Jerber2021NG	Jerber-2021-Nat. Genet	rs11922975
10.1038/s41588-021-00801-6	CL_0000700	Cell-type-specific eQTL	0.26125	Cell Proliferation On Day 52	Dopaminergic Neurons	GNL3	1	chr3:52894318-52894319	1.53030e-05	0.06041	Jerber2021NG	Jerber-2021-Nat. Genet	rs62253583
10.1038/s41588-021-00801-6	CL_0000700	Cell-type-specific eQTL	0.26125	Cell Proliferation On Day 52	Dopaminergic Neurons	GNL3	1	chr3:52894317-52894318	1.53030e-05	0.06041	Jerber2021NG	Jerber-2021-Nat. Genet	rs62253582
10.1038/s41588-021-00801-6	CL_0000700	Cell-type-specific eQTL	0.25986	Cell Proliferation On Day 52	Dopaminergic Neurons	GNL3	1	chr3:52890211-52890212	1.46680e-05	0.05996	Jerber2021NG	Jerber-2021-Nat. Genet	rs9810807
10.1038/s41588-021-00801-6	CL_0000700	Cell-type-specific eQTL	0.26125	Cell Proliferation On Day 52	Dopaminergic Neurons	GNL3	1	chr3:52889235-52889236	1.53030e-05	0.06041	Jerber2021NG	Jerber-2021-Nat. Genet	rs9880978
10.1038/s41588-021-00801-6	CL_0000700	Cell-type-specific eQTL	0.25568	Cell Proliferation On Day 52	Dopaminergic Neurons	GNL3	1	chr3:52888605-52888606	2.37831e-05	0.0605	Jerber2021NG	Jerber-2021-Nat. Genet	rs6795646
10.1038/s41588-021-00801-6	CL_0000700	Cell-type-specific eQTL	0.25469	Cell Proliferation On Day 52	Dopaminergic Neurons	GNL3	1	chr3:52885431-52885432	2.45520e-05	0.06037	Jerber2021NG	Jerber-2021-Nat. Genet	rs12638968
10.1038/s41588-021-00801-6	CL_0000700	Cell-type-specific eQTL	0.25469	Cell Proliferation On Day 52	Dopaminergic Neurons	GNL3	1	chr3:52885080-52885081	2.45520e-05	0.06037	Jerber2021NG	Jerber-2021-Nat. Genet	rs2336668
10.1038/s41588-021-00801-6	CL_0000700	Cell-type-specific eQTL	0.25469	Cell Proliferation On Day 52	Dopaminergic Neurons	GNL3	1	chr3:52884497-52884498	2.45520e-05	0.06037	Jerber2021NG	Jerber-2021-Nat. Genet	rs4687684
10.1038/s41588-021-00801-6	CL_0000700	Cell-type-specific eQTL	0.25469	Cell Proliferation On Day 52	Dopaminergic Neurons	GNL3	1	chr3:52884483-52884484	2.45520e-05	0.06037	Jerber2021NG	Jerber-2021-Nat. Genet	rs4687683
10.1038/s41588-021-00801-6	CL_0000700	Cell-type-specific eQTL	0.25469	Cell Proliferation On Day 52	Dopaminergic Neurons	GNL3	1	chr3:52884406-52884407	2.45520e-05	0.06037	Jerber2021NG	Jerber-2021-Nat. Genet	rs4687562
10.1038/s41588-021-00801-6	CL_0000700	Cell-type-specific eQTL	0.26722	Cell Proliferation On Day 52	Dopaminergic Neurons	GNL3	1	chr3:52882923-52882924	1.01578e-05	0.06054	Jerber2021NG	Jerber-2021-Nat. Genet	rs4687682
10.1038/s41588-021-00801-6	CL_0000700	Cell-type-specific eQTL	0.25469	Cell Proliferation On Day 52	Dopaminergic Neurons	GNL3	1	chr3:52882347-52882348	2.45520e-05	0.06037	Jerber2021NG	Jerber-2021-Nat. Genet	rs2336667
10.1038/s41588-021-00801-6	CL_0000700	Cell-type-specific eQTL	0.26722	Cell Proliferation On Day 52	Dopaminergic Neurons	GNL3	1	chr3:52881203-52881204	1.01578e-05	0.06054	Jerber2021NG	Jerber-2021-Nat. Genet	rs9866243
10.1038/s41588-021-00801-6	CL_0000700	Cell-type-specific eQTL	0.25568	Cell Proliferation On Day 52	Dopaminergic Neurons	GNL3	1	chr3:52879765-52879766	2.37831e-05	0.0605	Jerber2021NG	Jerber-2021-Nat. Genet	rs9860296
10.1038/s41588-021-00801-6	CL_0000700	Cell-type-specific eQTL	-0.25568	Cell Proliferation On Day 52	Dopaminergic Neurons	GNL3	1	chr3:52878280-52878281	2.37831e-05	0.0605	Jerber2021NG	Jerber-2021-Nat. Genet	rs12492391
10.1038/s41588-021-00801-6	CL_0000700	Cell-type-specific eQTL	0.26832	Cell Proliferation On Day 52	Dopaminergic Neurons	GNL3	1	chr3:52878198-52878199	9.78395e-06	0.06068	Jerber2021NG	Jerber-2021-Nat. Genet	rs9850563
10.1038/s41588-021-00801-6	CL_0000700	Cell-type-specific eQTL	0.26832	Cell Proliferation On Day 52	Dopaminergic Neurons	GNL3	1	chr3:52874382-52874383	9.78395e-06	0.06068	Jerber2021NG	Jerber-2021-Nat. Genet	rs56383738
10.1038/s41588-021-00801-6	CL_0000700	Cell-type-specific eQTL	-0.25568	Cell Proliferation On Day 52	Dopaminergic Neurons	GNL3	1	chr3:52873356-52873357	2.37831e-05	0.0605	Jerber2021NG	Jerber-2021-Nat. Genet	rs4687680
10.1038/s41588-021-00801-6	CL_0000700	Cell-type-specific eQTL	-0.25469	Cell Proliferation On Day 52	Dopaminergic Neurons	GNL3	1	chr3:52871197-52871198	2.45520e-05	0.06037	Jerber2021NG	Jerber-2021-Nat. Genet	rs2336664
10.1038/s41588-021-00801-6	CL_0000700	Cell-type-specific eQTL	0.25469	Cell Proliferation On Day 52	Dopaminergic Neurons	GNL3	1	chr3:52870508-52870509	2.45520e-05	0.06037	Jerber2021NG	Jerber-2021-Nat. Genet	rs9836499
10.1038/s41588-021-00801-6	CL_0000700	Cell-type-specific eQTL	0.27898	Cell Proliferation On Day 52	Dopaminergic Neurons	GNL3	1	chr3:52869430-52869431	3.30424e-06	0.05998	Jerber2021NG	Jerber-2021-Nat. Genet	rs10865977
10.1038/s41588-021-00801-6	CL_0000700	Cell-type-specific eQTL	-0.25568	Cell Proliferation On Day 52	Dopaminergic Neurons	GNL3	1	chr3:52867958-52867959	2.37831e-05	0.0605	Jerber2021NG	Jerber-2021-Nat. Genet	rs9825230
10.1038/s41588-021-00801-6	CL_0000700	Cell-type-specific eQTL	0.26832	Cell Proliferation On Day 52	Dopaminergic Neurons	GNL3	1	chr3:52865268-52865269	9.78395e-06	0.06068	Jerber2021NG	Jerber-2021-Nat. Genet	rs4687679
10.1038/s41588-021-00801-6	CL_0000700	Cell-type-specific eQTL	0.25469	Cell Proliferation On Day 52	Dopaminergic Neurons	GNL3	1	chr3:52863807-52863808	2.45520e-05	0.06037	Jerber2021NG	Jerber-2021-Nat. Genet	rs6764322
10.1038/s41588-021-00801-6	CL_0000700	Cell-type-specific eQTL	0.25469	Cell Proliferation On Day 52	Dopaminergic Neurons	GNL3	1	chr3:52863785-52863786	2.45520e-05	0.06037	Jerber2021NG	Jerber-2021-Nat. Genet	rs4350911
10.1038/s41588-021-00801-6	CL_0000700	Cell-type-specific eQTL	-0.25469	Cell Proliferation On Day 52	Dopaminergic Neurons	GNL3	1	chr3:52863079-52863080	2.45520e-05	0.06037	Jerber2021NG	Jerber-2021-Nat. Genet	rs6773650
10.1038/s41588-021-00801-6	CL_0000700	Cell-type-specific eQTL	-0.26616	Cell Proliferation On Day 52	Dopaminergic Neurons	GNL3	1	chr3:52862016-52862017	8.52655e-06	0.05979	Jerber2021NG	Jerber-2021-Nat. Genet	rs13072537
10.1038/s41588-021-00801-6	CL_0000700	Cell-type-specific eQTL	-0.26616	Cell Proliferation On Day 52	Dopaminergic Neurons	GNL3	1	chr3:52861769-52861770	8.52655e-06	0.05979	Jerber2021NG	Jerber-2021-Nat. Genet	rs12487379
10.1038/s41588-021-00801-6	CL_0000700	Cell-type-specific eQTL	-0.25785	Cell Proliferation On Day 52	Dopaminergic Neurons	GNL3	0	chr3:52859449-52859450	7.42623e-05	0.06508	Jerber2021NG	Jerber-2021-Nat. Genet	rs6798941
10.1038/s41588-021-00801-6	CL_0000700	Cell-type-specific eQTL	0.26157	Cell Proliferation On Day 52	Dopaminergic Neurons	GNL3	0	chr3:52859410-52859411	9.18027e-06	0.05897	Jerber2021NG	Jerber-2021-Nat. Genet	rs7612624
10.1038/s41588-021-00801-6	CL_0000700	Cell-type-specific eQTL	0.25889	Cell Proliferation On Day 52	Dopaminergic Neurons	GNL3	1	chr3:52857691-52857692	7.13573e-06	0.05767	Jerber2021NG	Jerber-2021-Nat. Genet	rs7620690
10.1038/s41588-021-00801-6	CL_0000700	Cell-type-specific eQTL	0.25889	Cell Proliferation On Day 52	Dopaminergic Neurons	GNL3	1	chr3:52857554-52857555	7.13573e-06	0.05767	Jerber2021NG	Jerber-2021-Nat. Genet	rs7630552
10.1038/s41588-021-00801-6	CL_0000700	Cell-type-specific eQTL	0.25889	Cell Proliferation On Day 52	Dopaminergic Neurons	GNL3	1	chr3:52852224-52852225	7.13573e-06	0.05767	Jerber2021NG	Jerber-2021-Nat. Genet	rs2336558
10.1038/s41588-021-00801-6	CL_0000700	Cell-type-specific eQTL	0.25889	Cell Proliferation On Day 52	Dopaminergic Neurons	GNL3	1	chr3:52849054-52849055	7.13573e-06	0.05767	Jerber2021NG	Jerber-2021-Nat. Genet	rs11715347
10.1038/s41588-021-00801-6	CL_0000700	Cell-type-specific eQTL	0.2408	Cell Proliferation On Day 52	Dopaminergic Neurons	GNL3	0	chr3:52847080-52847081	3.37454e-04	0.06717	Jerber2021NG	Jerber-2021-Nat. Genet	rs2001735
10.1038/s41588-021-00801-6	CL_0000700	Cell-type-specific eQTL	-0.25208	Cell Proliferation On Day 52	Dopaminergic Neurons	GNL3	1	chr3:52846112-52846113	1.19081e-05	0.05756	Jerber2021NG	Jerber-2021-Nat. Genet	rs6445541
10.1038/s41588-021-00801-6	CL_0000700	Cell-type-specific eQTL	0.43254	Cell Proliferation On Day 52	Dopaminergic Neurons	GNL3	0	chr3:52845812-52845813	1.77526e-04	0.11537	Jerber2021NG	Jerber-2021-Nat. Genet	rs11130328
10.1038/s41588-021-00801-6	CL_0000700	Cell-type-specific eQTL	0.26475	Cell Proliferation On Day 52	Dopaminergic Neurons	GNL3	1	chr3:52844584-52844585	4.69611e-06	0.05783	Jerber2021NG	Jerber-2021-Nat. Genet	rs56214994
10.1038/s41588-021-00801-6	CL_0000700	Cell-type-specific eQTL	0.26475	Cell Proliferation On Day 52	Dopaminergic Neurons	GNL3	1	chr3:52842373-52842374	4.69611e-06	0.05783	Jerber2021NG	Jerber-2021-Nat. Genet	rs11719137
10.1038/s41588-021-00801-6	CL_0000700	Cell-type-specific eQTL	0.26475	Cell Proliferation On Day 52	Dopaminergic Neurons	GNL3	1	chr3:52840737-52840738	4.69611e-06	0.05783	Jerber2021NG	Jerber-2021-Nat. Genet	rs56019197
10.1038/s41588-021-00801-6	CL_0000700	Cell-type-specific eQTL	0.26475	Cell Proliferation On Day 52	Dopaminergic Neurons	GNL3	1	chr3:52840430-52840431	4.69611e-06	0.05783	Jerber2021NG	Jerber-2021-Nat. Genet	rs6769789
10.1038/s41588-021-00801-6	CL_0000700	Cell-type-specific eQTL	0.2419	Cell Proliferation On Day 52	Dopaminergic Neurons	GNL3	1	chr3:52836308-52836309	1.80433e-04	0.06459	Jerber2021NG	Jerber-2021-Nat. Genet	rs4687662
10.1038/s41588-021-00801-6	CL_0000700	Cell-type-specific eQTL	0.26475	Cell Proliferation On Day 52	Dopaminergic Neurons	GNL3	1	chr3:52835247-52835248	4.69611e-06	0.05783	Jerber2021NG	Jerber-2021-Nat. Genet	rs2276823
10.1038/s41588-021-00801-6	CL_0000700	Cell-type-specific eQTL	0.26475	Cell Proliferation On Day 52	Dopaminergic Neurons	GNL3	1	chr3:52834594-52834595	4.69611e-06	0.05783	Jerber2021NG	Jerber-2021-Nat. Genet	rs11922961
10.1038/s41588-021-00801-6	CL_0000700	Cell-type-specific eQTL	0.26475	Cell Proliferation On Day 52	Dopaminergic Neurons	GNL3	1	chr3:52834129-52834130	4.69611e-06	0.05783	Jerber2021NG	Jerber-2021-Nat. Genet	rs11918800
10.1038/s41588-021-00801-6	CL_0000700	Cell-type-specific eQTL	0.26475	Cell Proliferation On Day 52	Dopaminergic Neurons	GNL3	1	chr3:52833579-52833580	4.69611e-06	0.05783	Jerber2021NG	Jerber-2021-Nat. Genet	rs60332615
10.1038/s41588-021-00801-6	CL_0000700	Cell-type-specific eQTL	0.26475	Cell Proliferation On Day 52	Dopaminergic Neurons	GNL3	1	chr3:52832829-52832830	4.69611e-06	0.05783	Jerber2021NG	Jerber-2021-Nat. Genet	rs11915546
10.1038/s41588-021-00801-6	CL_0000700	Cell-type-specific eQTL	0.26475	Cell Proliferation On Day 52	Dopaminergic Neurons	GNL3	1	chr3:52832519-52832520	4.69611e-06	0.05783	Jerber2021NG	Jerber-2021-Nat. Genet	rs7652667
10.1038/s41588-021-00801-6	CL_0000700	Cell-type-specific eQTL	-0.25889	Cell Proliferation On Day 52	Dopaminergic Neurons	GNL3	1	chr3:52830568-52830569	7.13573e-06	0.05767	Jerber2021NG	Jerber-2021-Nat. Genet	rs2071042
10.1038/s41588-021-00801-6	CL_0000700	Cell-type-specific eQTL	-0.25208	Cell Proliferation On Day 52	Dopaminergic Neurons	GNL3	1	chr3:52829589-52829590	1.19081e-05	0.05756	Jerber2021NG	Jerber-2021-Nat. Genet	rs3774364
10.1038/s41588-021-00801-6	CL_0000700	Cell-type-specific eQTL	-0.26475	Cell Proliferation On Day 52	Dopaminergic Neurons	GNL3	1	chr3:52828737-52828738	4.69611e-06	0.05783	Jerber2021NG	Jerber-2021-Nat. Genet	rs2245647
10.1038/s41588-021-00801-6	CL_0000700	Cell-type-specific eQTL	-0.26475	Cell Proliferation On Day 52	Dopaminergic Neurons	GNL3	1	chr3:52825614-52825615	4.69611e-06	0.05783	Jerber2021NG	Jerber-2021-Nat. Genet	rs2535633
10.1038/s41588-021-00801-6	CL_0000700	Cell-type-specific eQTL	-0.26475	Cell Proliferation On Day 52	Dopaminergic Neurons	GNL3	1	chr3:52825510-52825511	4.69611e-06	0.05783	Jerber2021NG	Jerber-2021-Nat. Genet	rs2240915
10.1038/s41588-021-00801-6	CL_0000700	Cell-type-specific eQTL	-0.25897	Cell Proliferation On Day 52	Dopaminergic Neurons	GNL3	1	chr3:52821849-52821850	8.65257e-06	0.05822	Jerber2021NG	Jerber-2021-Nat. Genet	rs2256332
10.1038/s41588-021-00801-6	CL_0000700	Cell-type-specific eQTL	-0.26475	Cell Proliferation On Day 52	Dopaminergic Neurons	GNL3	1	chr3:52820170-52820171	4.69611e-06	0.05783	Jerber2021NG	Jerber-2021-Nat. Genet	rs2239548
10.1038/s41588-021-00801-6	CL_0000700	Cell-type-specific eQTL	-0.26475	Cell Proliferation On Day 52	Dopaminergic Neurons	GNL3	1	chr3:52818044-52818045	4.69611e-06	0.05783	Jerber2021NG	Jerber-2021-Nat. Genet	rs2245538
10.1038/s41588-021-00801-6	CL_0000700	Cell-type-specific eQTL	-0.26475	Cell Proliferation On Day 52	Dopaminergic Neurons	GNL3	1	chr3:52817121-52817122	4.69611e-06	0.05783	Jerber2021NG	Jerber-2021-Nat. Genet	rs2240917
10.1038/s41588-021-00801-6	CL_0000700	Cell-type-specific eQTL	-0.26475	Cell Proliferation On Day 52	Dopaminergic Neurons	GNL3	1	chr3:52815533-52815534	4.69611e-06	0.05783	Jerber2021NG	Jerber-2021-Nat. Genet	rs7617468
10.1038/s41588-021-00801-6	CL_0000700	Cell-type-specific eQTL	0.24409	Cell Proliferation On Day 52	Dopaminergic Neurons	GNL3	1	chr3:52814880-52814881	2.64884e-04	0.06692	Jerber2021NG	Jerber-2021-Nat. Genet	rs3774358
10.1038/s41588-021-00801-6	CL_0000700	Cell-type-specific eQTL	-0.3562	Cell Proliferation On Day 52	Dopaminergic Neurons	GNL3	1	chr3:52813585-52813586	3.84590e-11	0.05389	Jerber2021NG	Jerber-2021-Nat. Genet	rs2071044
10.1038/s41588-021-00801-6	CL_0000700	Cell-type-specific eQTL	-0.35495	Cell Proliferation On Day 52	Dopaminergic Neurons	GNL3	1	chr3:52811089-52811090	4.90842e-11	0.05399	Jerber2021NG	Jerber-2021-Nat. Genet	rs2535627
10.1038/s41588-021-00801-6	CL_0000700	Cell-type-specific eQTL	-0.2988	Cell Proliferation On Day 52	Dopaminergic Neurons	GNL3	1	chr3:52804386-52804387	2.18118e-06	0.06309	Jerber2021NG	Jerber-2021-Nat. Genet	rs4687552
10.1038/s41588-021-00801-6	CL_0000700	Cell-type-specific eQTL	-0.2988	Cell Proliferation On Day 52	Dopaminergic Neurons	GNL3	1	chr3:52803839-52803840	2.18118e-06	0.06309	Jerber2021NG	Jerber-2021-Nat. Genet	rs2710331
10.1038/s41588-021-00801-6	CL_0000700	Cell-type-specific eQTL	-0.35495	Cell Proliferation On Day 52	Dopaminergic Neurons	GNL3	1	chr3:52803777-52803778	4.90842e-11	0.05399	Jerber2021NG	Jerber-2021-Nat. Genet	rs4481150
10.1038/s41588-021-00801-6	CL_0000700	Cell-type-specific eQTL	-0.30904	Cell Proliferation On Day 52	Dopaminergic Neurons	GNL3	1	chr3:52801338-52801339	2.08666e-07	0.05953	Jerber2021NG	Jerber-2021-Nat. Genet	rs736408
10.1038/s41588-021-00801-6	CL_0000700	Cell-type-specific eQTL	-0.3234	Cell Proliferation On Day 52	Dopaminergic Neurons	GNL3	1	chr3:52799789-52799790	1.19522e-09	0.05318	Jerber2021NG	Jerber-2021-Nat. Genet	rs3617
10.1038/s41588-021-00801-6	CL_0000700	Cell-type-specific eQTL	-0.29371	Cell Proliferation On Day 52	Dopaminergic Neurons	GNL3	1	chr3:52799203-52799204	6.46870e-07	0.05902	Jerber2021NG	Jerber-2021-Nat. Genet	rs2535629
10.1038/s41588-021-00801-6	CL_0000700	Cell-type-specific eQTL	-0.3195	Cell Proliferation On Day 52	Dopaminergic Neurons	GNL3	1	chr3:52797685-52797686	3.15564e-07	0.06248	Jerber2021NG	Jerber-2021-Nat. Genet	rs2240919
10.1038/s41588-021-00801-6	CL_0000700	Cell-type-specific eQTL	-0.30611	Cell Proliferation On Day 52	Dopaminergic Neurons	GNL3	1	chr3:52796993-52796994	1.22558e-06	0.0631	Jerber2021NG	Jerber-2021-Nat. Genet	rs2240920
10.1038/s41588-021-00801-6	CL_0000700	Cell-type-specific eQTL	-0.30352	Cell Proliferation On Day 52	Dopaminergic Neurons	GNL3	1	chr3:52794612-52794613	9.04291e-07	0.0618	Jerber2021NG	Jerber-2021-Nat. Genet	rs9881468
10.1038/s41588-021-00801-6	CL_0000700	Cell-type-specific eQTL	-0.30611	Cell Proliferation On Day 52	Dopaminergic Neurons	GNL3	1	chr3:52793899-52793900	1.22558e-06	0.0631	Jerber2021NG	Jerber-2021-Nat. Genet	rs2239699
10.1038/s41588-021-00801-6	CL_0000700	Cell-type-specific eQTL	-0.30611	Cell Proliferation On Day 52	Dopaminergic Neurons	GNL3	1	chr3:52793550-52793551	1.22558e-06	0.0631	Jerber2021NG	Jerber-2021-Nat. Genet	rs4687654
10.1038/s41588-021-00801-6	CL_0000700	Cell-type-specific eQTL	-0.30886	Cell Proliferation On Day 52	Dopaminergic Neurons	GNL3	1	chr3:52792830-52792831	5.45929e-07	0.06165	Jerber2021NG	Jerber-2021-Nat. Genet	rs2071508
10.1038/s41588-021-00801-6	CL_0000700	Cell-type-specific eQTL	-0.30886	Cell Proliferation On Day 52	Dopaminergic Neurons	GNL3	1	chr3:52792691-52792692	5.45929e-07	0.06165	Jerber2021NG	Jerber-2021-Nat. Genet	rs2071507
10.1038/s41588-021-00801-6	CL_0000700	Cell-type-specific eQTL	-0.30751	Cell Proliferation On Day 52	Dopaminergic Neurons	GNL3	1	chr3:52792604-52792605	3.63005e-07	0.06045	Jerber2021NG	Jerber-2021-Nat. Genet	rs746694
10.1038/s41588-021-00801-6	CL_0000700	Cell-type-specific eQTL	-0.30751	Cell Proliferation On Day 52	Dopaminergic Neurons	GNL3	1	chr3:52792260-52792261	3.63005e-07	0.06045	Jerber2021NG	Jerber-2021-Nat. Genet	rs2071506
10.1038/s41588-021-00801-6	CL_0000700	Cell-type-specific eQTL	-0.30751	Cell Proliferation On Day 52	Dopaminergic Neurons	GNL3	1	chr3:52791569-52791570	3.63005e-07	0.06045	Jerber2021NG	Jerber-2021-Nat. Genet	rs9324
10.1038/s41588-021-00801-6	CL_0000700	Cell-type-specific eQTL	-0.30751	Cell Proliferation On Day 52	Dopaminergic Neurons	GNL3	1	chr3:52791512-52791513	3.63005e-07	0.06045	Jerber2021NG	Jerber-2021-Nat. Genet	rs1075653
10.1038/s41588-021-00801-6	CL_0000700	Cell-type-specific eQTL	-0.30886	Cell Proliferation On Day 52	Dopaminergic Neurons	GNL3	1	chr3:52791446-52791447	5.45929e-07	0.06165	Jerber2021NG	Jerber-2021-Nat. Genet	rs1076425
10.1038/s41588-021-00801-6	CL_0000700	Cell-type-specific eQTL	-0.30886	Cell Proliferation On Day 52	Dopaminergic Neurons	GNL3	1	chr3:52790594-52790595	5.45929e-07	0.06165	Jerber2021NG	Jerber-2021-Nat. Genet	rs6778329
10.1038/s41588-021-00801-6	CL_0000700	Cell-type-specific eQTL	-0.30886	Cell Proliferation On Day 52	Dopaminergic Neurons	GNL3	1	chr3:52790079-52790080	5.45929e-07	0.06165	Jerber2021NG	Jerber-2021-Nat. Genet	rs2270197
10.1038/s41588-021-00801-6	CL_0000700	Cell-type-specific eQTL	-0.30886	Cell Proliferation On Day 52	Dopaminergic Neurons	GNL3	1	chr3:52789432-52789433	5.45929e-07	0.06165	Jerber2021NG	Jerber-2021-Nat. Genet	rs4687551
10.1038/s41588-021-00801-6	CL_0000700	Cell-type-specific eQTL	-0.30886	Cell Proliferation On Day 52	Dopaminergic Neurons	GNL3	1	chr3:52789414-52789415	5.45929e-07	0.06165	Jerber2021NG	Jerber-2021-Nat. Genet	rs4687550
10.1038/s41588-021-00801-6	CL_0000700	Cell-type-specific eQTL	-0.29355	Cell Proliferation On Day 52	Dopaminergic Neurons	GNL3	1	chr3:52789110-52789111	9.28815e-07	0.05983	Jerber2021NG	Jerber-2021-Nat. Genet	rs2239549
10.1038/s41588-021-00801-6	CL_0000700	Cell-type-specific eQTL	-0.29355	Cell Proliferation On Day 52	Dopaminergic Neurons	GNL3	1	chr3:52788905-52788906	9.28815e-07	0.05983	Jerber2021NG	Jerber-2021-Nat. Genet	rs2300149
10.1038/s41588-021-00801-6	CL_0000700	Cell-type-specific eQTL	-0.29355	Cell Proliferation On Day 52	Dopaminergic Neurons	GNL3	1	chr3:52788840-52788841	9.28815e-07	0.05983	Jerber2021NG	Jerber-2021-Nat. Genet	rs2284350
10.1038/s41588-021-00801-6	CL_0000700	Cell-type-specific eQTL	-0.29355	Cell Proliferation On Day 52	Dopaminergic Neurons	GNL3	1	chr3:52788773-52788774	9.28815e-07	0.05983	Jerber2021NG	Jerber-2021-Nat. Genet	rs2284351
10.1038/s41588-021-00801-6	CL_0000700	Cell-type-specific eQTL	-0.29355	Cell Proliferation On Day 52	Dopaminergic Neurons	GNL3	1	chr3:52788493-52788494	9.28815e-07	0.05983	Jerber2021NG	Jerber-2021-Nat. Genet	rs2239550
10.1038/s41588-021-00801-6	CL_0000700	Cell-type-specific eQTL	-0.28935	Cell Proliferation On Day 52	Dopaminergic Neurons	GNL3	1	chr3:52787161-52787162	1.38365e-06	0.05994	Jerber2021NG	Jerber-2021-Nat. Genet	rs2286798
10.1038/s41588-021-00801-6	CL_0000700	Cell-type-specific eQTL	-0.31298	Cell Proliferation On Day 52	Dopaminergic Neurons	GNL3	1	chr3:52786995-52786996	8.11167e-08	0.05834	Jerber2021NG	Jerber-2021-Nat. Genet	rs1042779
10.1038/s41588-021-00801-6	CL_0000700	Cell-type-specific eQTL	-0.28972	Cell Proliferation On Day 52	Dopaminergic Neurons	GNL3	1	chr3:52786965-52786966	2.10689e-06	0.06109	Jerber2021NG	Jerber-2021-Nat. Genet	rs678
10.1038/s41588-021-00801-6	CL_0000700	Cell-type-specific eQTL	-0.27937	Cell Proliferation On Day 52	Dopaminergic Neurons	GNL3	1	chr3:52785311-52785312	1.35165e-06	0.05782	Jerber2021NG	Jerber-2021-Nat. Genet	rs2268023
10.1038/s41588-021-00801-6	CL_0000700	Cell-type-specific eQTL	-0.28762	Cell Proliferation On Day 52	Dopaminergic Neurons	GNL3	1	chr3:52784563-52784564	1.49169e-06	0.05977	Jerber2021NG	Jerber-2021-Nat. Genet	rs2239551
10.1038/s41588-021-00801-6	CL_0000700	Cell-type-specific eQTL	-0.28463	Cell Proliferation On Day 52	Dopaminergic Neurons	GNL3	1	chr3:52783762-52783763	3.20672e-06	0.06112	Jerber2021NG	Jerber-2021-Nat. Genet	rs3774355
10.1038/s41588-021-00801-6	CL_0000700	Cell-type-specific eQTL	-0.28463	Cell Proliferation On Day 52	Dopaminergic Neurons	GNL3	1	chr3:52783659-52783660	3.20672e-06	0.06112	Jerber2021NG	Jerber-2021-Nat. Genet	rs3774354
10.1038/s41588-021-00801-6	CL_0000700	Cell-type-specific eQTL	-0.36151	Cell Proliferation On Day 52	Dopaminergic Neurons	GNL3	1	chr3:52783577-52783578	5.70182e-05	0.08982	Jerber2021NG	Jerber-2021-Nat. Genet	rs2710322
10.1038/s41588-021-00801-6	CL_0000700	Cell-type-specific eQTL	-0.35317	Cell Proliferation On Day 52	Dopaminergic Neurons	GNL3	1	chr3:52781889-52781890	1.52259e-11	0.05235	Jerber2021NG	Jerber-2021-Nat. Genet	rs2710323
10.1038/s41588-021-00801-6	CL_0000700	Cell-type-specific eQTL	-0.35227	Cell Proliferation On Day 52	Dopaminergic Neurons	GNL3	0	chr3:52780240-52780241	6.03515e-11	0.05384	Jerber2021NG	Jerber-2021-Nat. Genet	rs2302417
10.1038/s41588-021-00801-6	CL_0000700	Cell-type-specific eQTL	-0.30866	Cell Proliferation On Day 52	Dopaminergic Neurons	GNL3	1	chr3:52777156-52777157	1.17790e-07	0.05827	Jerber2021NG	Jerber-2021-Nat. Genet	rs6792369
10.1038/s41588-021-00801-6	CL_0000700	Cell-type-specific eQTL	-0.26636	Cell Proliferation On Day 52	Dopaminergic Neurons	GNL3	1	chr3:52776917-52776918	3.29298e-06	0.05726	Jerber2021NG	Jerber-2021-Nat. Genet	rs2098167
10.1038/s41588-021-00801-6	CL_0000700	Cell-type-specific eQTL	-0.31438	Cell Proliferation On Day 52	Dopaminergic Neurons	GNL3	1	chr3:52775509-52775510	3.48087e-08	0.057	Jerber2021NG	Jerber-2021-Nat. Genet	rs2019065
10.1038/s41588-021-00801-6	CL_0000700	Cell-type-specific eQTL	-0.32584	Cell Proliferation On Day 52	Dopaminergic Neurons	GNL3	1	chr3:52775177-52775178	4.21242e-08	0.05944	Jerber2021NG	Jerber-2021-Nat. Genet	rs3755799
10.1038/s41588-021-00801-6	CL_0000700	Cell-type-specific eQTL	-0.32336	Cell Proliferation On Day 52	Dopaminergic Neurons	GNL3	1	chr3:52774325-52774326	3.02647e-08	0.05837	Jerber2021NG	Jerber-2021-Nat. Genet	rs1014969
10.1038/s41588-021-00801-6	CL_0000700	Cell-type-specific eQTL	-0.2928	Cell Proliferation On Day 52	Dopaminergic Neurons	GNL3	1	chr3:52773720-52773721	7.30041e-07	0.05911	Jerber2021NG	Jerber-2021-Nat. Genet	rs11717836
10.1038/s41588-021-00801-6	CL_0000700	Cell-type-specific eQTL	-0.32243	Cell Proliferation On Day 52	Dopaminergic Neurons	GNL3	1	chr3:52771077-52771078	3.15411e-08	0.05828	Jerber2021NG	Jerber-2021-Nat. Genet	rs998909
10.1038/s41588-021-00801-6	CL_0000700	Cell-type-specific eQTL	-0.2928	Cell Proliferation On Day 52	Dopaminergic Neurons	GNL3	1	chr3:52769189-52769190	7.30041e-07	0.05911	Jerber2021NG	Jerber-2021-Nat. Genet	rs2268024
10.1038/s41588-021-00801-6	CL_0000700	Cell-type-specific eQTL	-0.31511	Cell Proliferation On Day 52	Dopaminergic Neurons	GNL3	1	chr3:52768386-52768387	4.25595e-08	0.0575	Jerber2021NG	Jerber-2021-Nat. Genet	rs2230534
10.1038/s41588-021-00801-6	CL_0000700	Cell-type-specific eQTL	-0.2928	Cell Proliferation On Day 52	Dopaminergic Neurons	GNL3	1	chr3:52766715-52766716	7.30041e-07	0.05911	Jerber2021NG	Jerber-2021-Nat. Genet	rs4687650
10.1038/s41588-021-00801-6	CL_0000700	Cell-type-specific eQTL	-0.31511	Cell Proliferation On Day 52	Dopaminergic Neurons	GNL3	1	chr3:52766268-52766269	4.25595e-08	0.0575	Jerber2021NG	Jerber-2021-Nat. Genet	rs2230535
10.1038/s41588-021-00801-6	CL_0000700	Cell-type-specific eQTL	-0.2928	Cell Proliferation On Day 52	Dopaminergic Neurons	GNL3	1	chr3:52763618-52763619	7.30041e-07	0.05911	Jerber2021NG	Jerber-2021-Nat. Genet	rs1029871
10.1038/s41588-021-00801-6	CL_0000700	Cell-type-specific eQTL	-0.2928	Cell Proliferation On Day 52	Dopaminergic Neurons	GNL3	1	chr3:52761208-52761209	7.30041e-07	0.05911	Jerber2021NG	Jerber-2021-Nat. Genet	rs2268025
10.1038/s41588-021-00801-6	CL_0000700	Cell-type-specific eQTL	-0.32791	Cell Proliferation On Day 52	Dopaminergic Neurons	GNL3	1	chr3:52760351-52760352	1.53008e-08	0.05795	Jerber2021NG	Jerber-2021-Nat. Genet	rs4687648
10.1038/s41588-021-00801-6	CL_0000700	Cell-type-specific eQTL	-0.32243	Cell Proliferation On Day 52	Dopaminergic Neurons	GNL3	1	chr3:52759586-52759587	3.15411e-08	0.05828	Jerber2021NG	Jerber-2021-Nat. Genet	rs12497998
10.1038/s41588-021-00801-6	CL_0000700	Cell-type-specific eQTL	-0.2928	Cell Proliferation On Day 52	Dopaminergic Neurons	GNL3	1	chr3:52759223-52759224	7.30041e-07	0.05911	Jerber2021NG	Jerber-2021-Nat. Genet	rs11130327
10.1038/s41588-021-00801-6	CL_0000700	Cell-type-specific eQTL	-0.31511	Cell Proliferation On Day 52	Dopaminergic Neurons	GNL3	1	chr3:52756197-52756198	4.25595e-08	0.0575	Jerber2021NG	Jerber-2021-Nat. Genet	rs13061423
10.1038/s41588-021-00801-6	CL_0000700	Cell-type-specific eQTL	-0.28702	Cell Proliferation On Day 52	Dopaminergic Neurons	GNL3	1	chr3:52754943-52754944	4.45609e-07	0.05685	Jerber2021NG	Jerber-2021-Nat. Genet	rs6414570
10.1038/s41588-021-00801-6	CL_0000700	Cell-type-specific eQTL	-0.31511	Cell Proliferation On Day 52	Dopaminergic Neurons	GNL3	1	chr3:52753587-52753588	4.25595e-08	0.0575	Jerber2021NG	Jerber-2021-Nat. Genet	rs2336545
10.1038/s41588-021-00801-6	CL_0000700	Cell-type-specific eQTL	-0.2928	Cell Proliferation On Day 52	Dopaminergic Neurons	GNL3	1	chr3:52753226-52753227	7.30041e-07	0.05911	Jerber2021NG	Jerber-2021-Nat. Genet	rs13095332
10.1038/s41588-021-00801-6	CL_0000700	Cell-type-specific eQTL	-0.31277	Cell Proliferation On Day 52	Dopaminergic Neurons	GNL3	0	chr3:52752897-52752898	8.74742e-08	0.05845	Jerber2021NG	Jerber-2021-Nat. Genet	rs13094778
10.1038/s41588-021-00801-6	CL_0000700	Cell-type-specific eQTL	-0.36973	Cell Proliferation On Day 52	Dopaminergic Neurons	GNL3	1	chr3:52751222-52751223	1.00875e-11	0.05433	Jerber2021NG	Jerber-2021-Nat. Genet	rs7646741
10.1038/s41588-021-00801-6	CL_0000700	Cell-type-specific eQTL	-0.31511	Cell Proliferation On Day 52	Dopaminergic Neurons	GNL3	1	chr3:52751152-52751153	4.25595e-08	0.0575	Jerber2021NG	Jerber-2021-Nat. Genet	rs13082960
10.1038/s41588-021-00801-6	CL_0000700	Cell-type-specific eQTL	-0.32243	Cell Proliferation On Day 52	Dopaminergic Neurons	GNL3	1	chr3:52750400-52750401	3.15411e-08	0.05828	Jerber2021NG	Jerber-2021-Nat. Genet	rs6787154
10.1038/s41588-021-00801-6	CL_0000700	Cell-type-specific eQTL	-0.31511	Cell Proliferation On Day 52	Dopaminergic Neurons	GNL3	1	chr3:52748823-52748824	4.25595e-08	0.0575	Jerber2021NG	Jerber-2021-Nat. Genet	rs62255396
10.1038/s41588-021-00801-6	CL_0000700	Cell-type-specific eQTL	-0.2928	Cell Proliferation On Day 52	Dopaminergic Neurons	GNL3	1	chr3:52748258-52748259	7.30041e-07	0.05911	Jerber2021NG	Jerber-2021-Nat. Genet	rs13087772
10.1038/s41588-021-00801-6	CL_0000700	Cell-type-specific eQTL	-0.2928	Cell Proliferation On Day 52	Dopaminergic Neurons	GNL3	1	chr3:52747523-52747524	7.30041e-07	0.05911	Jerber2021NG	Jerber-2021-Nat. Genet	rs13082208
10.1038/s41588-021-00801-6	CL_0000700	Cell-type-specific eQTL	-0.32243	Cell Proliferation On Day 52	Dopaminergic Neurons	GNL3	1	chr3:52746493-52746494	3.15411e-08	0.05828	Jerber2021NG	Jerber-2021-Nat. Genet	rs2072390
10.1038/s41588-021-00801-6	CL_0000700	Cell-type-specific eQTL	-0.32243	Cell Proliferation On Day 52	Dopaminergic Neurons	GNL3	1	chr3:52745785-52745786	3.15411e-08	0.05828	Jerber2021NG	Jerber-2021-Nat. Genet	rs13074853
10.1038/s41588-021-00801-6	CL_0000700	Cell-type-specific eQTL	-0.32243	Cell Proliferation On Day 52	Dopaminergic Neurons	GNL3	1	chr3:52745575-52745576	3.15411e-08	0.05828	Jerber2021NG	Jerber-2021-Nat. Genet	rs112860674
10.1038/s41588-021-00801-6	CL_0000700	Cell-type-specific eQTL	-0.31511	Cell Proliferation On Day 52	Dopaminergic Neurons	GNL3	1	chr3:52744331-52744332	4.25595e-08	0.0575	Jerber2021NG	Jerber-2021-Nat. Genet	rs2268026
10.1038/s41588-021-00801-6	CL_0000700	Cell-type-specific eQTL	-0.2928	Cell Proliferation On Day 52	Dopaminergic Neurons	GNL3	1	chr3:52744035-52744036	7.30041e-07	0.05911	Jerber2021NG	Jerber-2021-Nat. Genet	rs2286800
10.1038/s41588-021-00801-6	CL_0000700	Cell-type-specific eQTL	-0.32243	Cell Proliferation On Day 52	Dopaminergic Neurons	GNL3	1	chr3:52742892-52742893	3.15411e-08	0.05828	Jerber2021NG	Jerber-2021-Nat. Genet	rs7638162
10.1038/s41588-021-00801-6	CL_0000700	Cell-type-specific eQTL	-0.32243	Cell Proliferation On Day 52	Dopaminergic Neurons	GNL3	1	chr3:52740514-52740515	3.15411e-08	0.05828	Jerber2021NG	Jerber-2021-Nat. Genet	rs2159644
10.1038/s41588-021-00801-6	CL_0000700	Cell-type-specific eQTL	-0.28885	Cell Proliferation On Day 52	Dopaminergic Neurons	GNL3	1	chr3:52737904-52737905	1.93950e-06	0.06069	Jerber2021NG	Jerber-2021-Nat. Genet	rs11130326
10.1038/s41588-021-00801-6	CL_0000700	Cell-type-specific eQTL	-0.32243	Cell Proliferation On Day 52	Dopaminergic Neurons	GNL3	1	chr3:52737452-52737453	3.15411e-08	0.05828	Jerber2021NG	Jerber-2021-Nat. Genet	rs6445535
10.1038/s41588-021-00801-6	CL_0000700	Cell-type-specific eQTL	-0.31511	Cell Proliferation On Day 52	Dopaminergic Neurons	GNL3	1	chr3:52736968-52736969	4.25595e-08	0.0575	Jerber2021NG	Jerber-2021-Nat. Genet	rs11130325
10.1038/s41588-021-00801-6	CL_0000700	Cell-type-specific eQTL	-0.36973	Cell Proliferation On Day 52	Dopaminergic Neurons	GNL3	1	chr3:52736294-52736295	1.00875e-11	0.05433	Jerber2021NG	Jerber-2021-Nat. Genet	rs11130324
10.1038/s41588-021-00801-6	CL_0000700	Cell-type-specific eQTL	-0.31511	Cell Proliferation On Day 52	Dopaminergic Neurons	GNL3	1	chr3:52736261-52736262	4.25595e-08	0.0575	Jerber2021NG	Jerber-2021-Nat. Genet	rs11130323
10.1038/s41588-021-00801-6	CL_0000700	Cell-type-specific eQTL	-0.32243	Cell Proliferation On Day 52	Dopaminergic Neurons	GNL3	1	chr3:52733411-52733412	3.15411e-08	0.05828	Jerber2021NG	Jerber-2021-Nat. Genet	rs767418
10.1038/s41588-021-00801-6	CL_0000700	Cell-type-specific eQTL	-0.2928	Cell Proliferation On Day 52	Dopaminergic Neurons	GNL3	1	chr3:52732590-52732591	7.30041e-07	0.05911	Jerber2021NG	Jerber-2021-Nat. Genet	rs2268027
10.1038/s41588-021-00801-6	CL_0000700	Cell-type-specific eQTL	-0.32243	Cell Proliferation On Day 52	Dopaminergic Neurons	GNL3	1	chr3:52732106-52732107	3.15411e-08	0.05828	Jerber2021NG	Jerber-2021-Nat. Genet	rs34739010
10.1038/s41588-021-00801-6	CL_0000700	Cell-type-specific eQTL	-0.32243	Cell Proliferation On Day 52	Dopaminergic Neurons	GNL3	1	chr3:52731866-52731867	3.15411e-08	0.05828	Jerber2021NG	Jerber-2021-Nat. Genet	rs11714030
10.1038/s41588-021-00801-6	CL_0000700	Cell-type-specific eQTL	-0.32243	Cell Proliferation On Day 52	Dopaminergic Neurons	GNL3	1	chr3:52731630-52731631	3.15411e-08	0.05828	Jerber2021NG	Jerber-2021-Nat. Genet	rs2079929
10.1038/s41588-021-00801-6	CL_0000700	Cell-type-specific eQTL	-0.2928	Cell Proliferation On Day 52	Dopaminergic Neurons	GNL3	1	chr3:52730608-52730609	7.30041e-07	0.05911	Jerber2021NG	Jerber-2021-Nat. Genet	rs10780035
10.1038/s41588-021-00801-6	CL_0000700	Cell-type-specific eQTL	-0.2928	Cell Proliferation On Day 52	Dopaminergic Neurons	GNL3	1	chr3:52729938-52729939	7.30041e-07	0.05911	Jerber2021NG	Jerber-2021-Nat. Genet	rs4687549
10.1038/s41588-021-00801-6	CL_0000700	Cell-type-specific eQTL	-0.31511	Cell Proliferation On Day 52	Dopaminergic Neurons	GNL3	1	chr3:52729147-52729148	4.25595e-08	0.0575	Jerber2021NG	Jerber-2021-Nat. Genet	rs34291015
10.1038/s41588-021-00801-6	CL_0000700	Cell-type-specific eQTL	-0.32243	Cell Proliferation On Day 52	Dopaminergic Neurons	GNL3	1	chr3:52728984-52728985	3.15411e-08	0.05828	Jerber2021NG	Jerber-2021-Nat. Genet	rs7653028
10.1038/s41588-021-00801-6	CL_0000700	Cell-type-specific eQTL	-0.2928	Cell Proliferation On Day 52	Dopaminergic Neurons	GNL3	1	chr3:52728976-52728977	7.30041e-07	0.05911	Jerber2021NG	Jerber-2021-Nat. Genet	rs13086623
10.1038/s41588-021-00801-6	CL_0000700	Cell-type-specific eQTL	-0.29414	Cell Proliferation On Day 52	Dopaminergic Neurons	GNL3	1	chr3:52728682-52728683	7.44607e-07	0.05943	Jerber2021NG	Jerber-2021-Nat. Genet	rs11130321
10.1038/s41588-021-00801-6	CL_0000700	Cell-type-specific eQTL	-0.31511	Cell Proliferation On Day 52	Dopaminergic Neurons	GNL3	1	chr3:52725153-52725154	4.25595e-08	0.0575	Jerber2021NG	Jerber-2021-Nat. Genet	rs34610878
10.1038/s41588-021-00801-6	CL_0000700	Cell-type-specific eQTL	-0.31511	Cell Proliferation On Day 52	Dopaminergic Neurons	GNL3	1	chr3:52724926-52724927	4.25595e-08	0.0575	Jerber2021NG	Jerber-2021-Nat. Genet	rs11714088
10.1038/s41588-021-00801-6	CL_0000700	Cell-type-specific eQTL	-0.31511	Cell Proliferation On Day 52	Dopaminergic Neurons	GNL3	0	chr3:52721576-52721577	4.25595e-08	0.0575	Jerber2021NG	Jerber-2021-Nat. Genet	rs11130319
10.1038/s41588-021-00801-6	CL_0000700	Cell-type-specific eQTL	-0.31351	Cell Proliferation On Day 52	Dopaminergic Neurons	GNL3	1	chr3:52719516-52719517	4.30428e-08	0.05723	Jerber2021NG	Jerber-2021-Nat. Genet	rs34918356
10.1038/s41588-021-00801-6	CL_0000700	Cell-type-specific eQTL	-0.36973	Cell Proliferation On Day 52	Dopaminergic Neurons	GNL3	1	chr3:52718943-52718944	1.00875e-11	0.05433	Jerber2021NG	Jerber-2021-Nat. Genet	rs35212380
10.1038/s41588-021-00801-6	CL_0000700	Cell-type-specific eQTL	-0.32243	Cell Proliferation On Day 52	Dopaminergic Neurons	GNL3	1	chr3:52718059-52718060	3.15411e-08	0.05828	Jerber2021NG	Jerber-2021-Nat. Genet	rs2109634
10.1038/s41588-021-00801-6	CL_0000700	Cell-type-specific eQTL	-0.32243	Cell Proliferation On Day 52	Dopaminergic Neurons	GNL3	1	chr3:52717518-52717519	3.15411e-08	0.05828	Jerber2021NG	Jerber-2021-Nat. Genet	rs7624716
10.1038/s41588-021-00801-6	CL_0000700	Cell-type-specific eQTL	-0.32243	Cell Proliferation On Day 52	Dopaminergic Neurons	GNL3	1	chr3:52715318-52715319	3.15411e-08	0.05828	Jerber2021NG	Jerber-2021-Nat. Genet	rs35526119
10.1038/s41588-021-00801-6	CL_0000700	Cell-type-specific eQTL	-0.32243	Cell Proliferation On Day 52	Dopaminergic Neurons	GNL3	1	chr3:52714841-52714842	3.15411e-08	0.05828	Jerber2021NG	Jerber-2021-Nat. Genet	rs11716747
10.1038/s41588-021-00801-6	CL_0000700	Cell-type-specific eQTL	-0.2928	Cell Proliferation On Day 52	Dopaminergic Neurons	GNL3	1	chr3:52714255-52714256	7.30041e-07	0.05911	Jerber2021NG	Jerber-2021-Nat. Genet	rs2878726
10.1038/s41588-021-00801-6	CL_0000700	Cell-type-specific eQTL	-0.32243	Cell Proliferation On Day 52	Dopaminergic Neurons	GNL3	1	chr3:52714042-52714043	3.15411e-08	0.05828	Jerber2021NG	Jerber-2021-Nat. Genet	rs1468638
10.1038/s41588-021-00801-6	CL_0000700	Cell-type-specific eQTL	-0.29654	Cell Proliferation On Day 52	Dopaminergic Neurons	GNL3	1	chr3:52713726-52713727	6.40647e-07	0.05956	Jerber2021NG	Jerber-2021-Nat. Genet	rs7620039
10.1038/s41588-021-00801-6	CL_0000700	Cell-type-specific eQTL	0.37009	Cell Proliferation On Day 52	Dopaminergic Neurons	GNL3	1	chr3:52713657-52713658	1.70805e-05	0.08607	Jerber2021NG	Jerber-2021-Nat. Genet	rs2336543
10.1038/s41588-021-00801-6	CL_0000700	Cell-type-specific eQTL	-0.31511	Cell Proliferation On Day 52	Dopaminergic Neurons	GNL3	1	chr3:52713305-52713306	4.25595e-08	0.0575	Jerber2021NG	Jerber-2021-Nat. Genet	rs62255371
10.1038/s41588-021-00801-6	CL_0000700	Cell-type-specific eQTL	-0.32243	Cell Proliferation On Day 52	Dopaminergic Neurons	GNL3	1	chr3:52712525-52712526	3.15411e-08	0.05828	Jerber2021NG	Jerber-2021-Nat. Genet	rs4687644
10.1038/s41588-021-00801-6	CL_0000700	Cell-type-specific eQTL	0.35526	Cell Proliferation On Day 52	Dopaminergic Neurons	GNL3	1	chr3:52711071-52711072	2.72530e-11	0.05334	Jerber2021NG	Jerber-2021-Nat. Genet	rs11235
10.1038/s41588-021-00801-6	CL_0000700	Cell-type-specific eQTL	-0.32243	Cell Proliferation On Day 52	Dopaminergic Neurons	GNL3	1	chr3:52710444-52710445	3.15411e-08	0.05828	Jerber2021NG	Jerber-2021-Nat. Genet	rs13079063
10.1038/s41588-021-00801-6	CL_0000700	Cell-type-specific eQTL	-0.32243	Cell Proliferation On Day 52	Dopaminergic Neurons	GNL3	1	chr3:52709368-52709369	3.15411e-08	0.05828	Jerber2021NG	Jerber-2021-Nat. Genet	rs6445534
10.1038/s41588-021-00801-6	CL_0000700	Cell-type-specific eQTL	-0.29395	Cell Proliferation On Day 52	Dopaminergic Neurons	GNL3	1	chr3:52708521-52708522	1.17295e-06	0.06048	Jerber2021NG	Jerber-2021-Nat. Genet	rs12486554
10.1038/s41588-021-00801-6	CL_0000700	Cell-type-specific eQTL	-0.31511	Cell Proliferation On Day 52	Dopaminergic Neurons	GNL3	1	chr3:52708397-52708398	4.25595e-08	0.0575	Jerber2021NG	Jerber-2021-Nat. Genet	rs34017441
10.1038/s41588-021-00801-6	CL_0000700	Cell-type-specific eQTL	-0.32243	Cell Proliferation On Day 52	Dopaminergic Neurons	GNL3	1	chr3:52707144-52707145	3.15411e-08	0.05828	Jerber2021NG	Jerber-2021-Nat. Genet	rs3755798
10.1038/s41588-021-00801-6	CL_0000700	Cell-type-specific eQTL	-0.32243	Cell Proliferation On Day 52	Dopaminergic Neurons	GNL3	1	chr3:52706166-52706167	3.15411e-08	0.05828	Jerber2021NG	Jerber-2021-Nat. Genet	rs6617
10.1038/s41588-021-00801-6	CL_0000700	Cell-type-specific eQTL	-0.2928	Cell Proliferation On Day 52	Dopaminergic Neurons	GNL3	1	chr3:52705504-52705505	7.30041e-07	0.05911	Jerber2021NG	Jerber-2021-Nat. Genet	rs8906
10.1038/s41588-021-00801-6	CL_0000700	Cell-type-specific eQTL	-0.32243	Cell Proliferation On Day 52	Dopaminergic Neurons	GNL3	1	chr3:52704149-52704150	3.15411e-08	0.05828	Jerber2021NG	Jerber-2021-Nat. Genet	rs12635140
10.1038/s41588-021-00801-6	CL_0000700	Cell-type-specific eQTL	-0.2928	Cell Proliferation On Day 52	Dopaminergic Neurons	GNL3	1	chr3:52700938-52700939	7.30041e-07	0.05911	Jerber2021NG	Jerber-2021-Nat. Genet	rs11130318
10.1038/s41588-021-00801-6	CL_0000700	Cell-type-specific eQTL	-0.36973	Cell Proliferation On Day 52	Dopaminergic Neurons	GNL3	1	chr3:52698413-52698414	1.00875e-11	0.05433	Jerber2021NG	Jerber-2021-Nat. Genet	rs13081155
10.1038/s41588-021-00801-6	CL_0000700	Cell-type-specific eQTL	-0.32243	Cell Proliferation On Day 52	Dopaminergic Neurons	GNL3	1	chr3:52697582-52697583	3.15411e-08	0.05828	Jerber2021NG	Jerber-2021-Nat. Genet	rs3733041
10.1038/s41588-021-00801-6	CL_0000700	Cell-type-specific eQTL	-0.31511	Cell Proliferation On Day 52	Dopaminergic Neurons	GNL3	1	chr3:52697467-52697468	4.25595e-08	0.0575	Jerber2021NG	Jerber-2021-Nat. Genet	rs11130317
10.1038/s41588-021-00801-6	CL_0000700	Cell-type-specific eQTL	-0.32243	Cell Proliferation On Day 52	Dopaminergic Neurons	GNL3	1	chr3:52697253-52697254	3.15411e-08	0.05828	Jerber2021NG	Jerber-2021-Nat. Genet	rs2164885
10.1038/s41588-021-00801-6	CL_0000700	Cell-type-specific eQTL	-0.2928	Cell Proliferation On Day 52	Dopaminergic Neurons	GNL3	1	chr3:52694788-52694789	7.30041e-07	0.05911	Jerber2021NG	Jerber-2021-Nat. Genet	rs6976
10.1038/s41588-021-00801-6	CL_0000700	Cell-type-specific eQTL	-0.32243	Cell Proliferation On Day 52	Dopaminergic Neurons	GNL3	1	chr3:52693241-52693242	3.15411e-08	0.05828	Jerber2021NG	Jerber-2021-Nat. Genet	rs2289247
10.1038/s41588-021-00801-6	CL_0000700	Cell-type-specific eQTL	-0.2928	Cell Proliferation On Day 52	Dopaminergic Neurons	GNL3	1	chr3:52692679-52692680	7.30041e-07	0.05911	Jerber2021NG	Jerber-2021-Nat. Genet	rs6762813
10.1038/s41588-021-00801-6	CL_0000700	Cell-type-specific eQTL	-0.2928	Cell Proliferation On Day 52	Dopaminergic Neurons	GNL3	1	chr3:52691945-52691946	7.30041e-07	0.05911	Jerber2021NG	Jerber-2021-Nat. Genet	rs13076193
10.1038/s41588-021-00801-6	CL_0000700	Cell-type-specific eQTL	-0.32243	Cell Proliferation On Day 52	Dopaminergic Neurons	GNL3	1	chr3:52691755-52691756	3.15411e-08	0.05828	Jerber2021NG	Jerber-2021-Nat. Genet	rs35315313
10.1038/s41588-021-00801-6	CL_0000700	Cell-type-specific eQTL	-0.36973	Cell Proliferation On Day 52	Dopaminergic Neurons	GNL3	1	chr3:52688319-52688320	1.00875e-11	0.05433	Jerber2021NG	Jerber-2021-Nat. Genet	rs3774349
10.1038/s41588-021-00801-6	CL_0000700	Cell-type-specific eQTL	-0.2928	Cell Proliferation On Day 52	Dopaminergic Neurons	GNL3	1	chr3:52687289-52687290	7.30041e-07	0.05911	Jerber2021NG	Jerber-2021-Nat. Genet	rs11177
10.1038/s41588-021-00801-6	CL_0000700	Cell-type-specific eQTL	-0.36973	Cell Proliferation On Day 52	Dopaminergic Neurons	GNL3	1	chr3:52686064-52686065	1.00875e-11	0.05433	Jerber2021NG	Jerber-2021-Nat. Genet	rs1108842
10.1038/s41588-021-00801-6	CL_0000700	Cell-type-specific eQTL	0.34851	Cell Proliferation On Day 52	Dopaminergic Neurons	GNL3	1	chr3:52685800-52685801	1.01432e-10	0.05391	Jerber2021NG	Jerber-2021-Nat. Genet	rs10933
10.1038/s41588-021-00801-6	CL_0000700	Cell-type-specific eQTL	-0.32243	Cell Proliferation On Day 52	Dopaminergic Neurons	GNL3	1	chr3:52685382-52685383	3.15411e-08	0.05828	Jerber2021NG	Jerber-2021-Nat. Genet	rs1866268
10.1038/s41588-021-00801-6	CL_0000700	Cell-type-specific eQTL	-0.32243	Cell Proliferation On Day 52	Dopaminergic Neurons	GNL3	1	chr3:52685072-52685073	3.15411e-08	0.05828	Jerber2021NG	Jerber-2021-Nat. Genet	rs3733039
10.1038/s41588-021-00801-6	CL_0000700	Cell-type-specific eQTL	-0.32243	Cell Proliferation On Day 52	Dopaminergic Neurons	GNL3	1	chr3:52684264-52684265	3.15411e-08	0.05828	Jerber2021NG	Jerber-2021-Nat. Genet	rs10865974
10.1038/s41588-021-00801-6	CL_0000700	Cell-type-specific eQTL	-0.2928	Cell Proliferation On Day 52	Dopaminergic Neurons	GNL3	1	chr3:52684138-52684139	7.30041e-07	0.05911	Jerber2021NG	Jerber-2021-Nat. Genet	rs10865973
10.1038/s41588-021-00801-6	CL_0000700	Cell-type-specific eQTL	-0.32243	Cell Proliferation On Day 52	Dopaminergic Neurons	GNL3	1	chr3:52683266-52683267	3.15411e-08	0.05828	Jerber2021NG	Jerber-2021-Nat. Genet	rs6445531
10.1038/s41588-021-00801-6	CL_0000700	Cell-type-specific eQTL	-0.32243	Cell Proliferation On Day 52	Dopaminergic Neurons	GNL3	1	chr3:52682921-52682922	3.15411e-08	0.05828	Jerber2021NG	Jerber-2021-Nat. Genet	rs34157897
10.1038/s41588-021-00801-6	CL_0000700	Cell-type-specific eQTL	-0.31511	Cell Proliferation On Day 52	Dopaminergic Neurons	GNL3	1	chr3:52677958-52677959	4.25595e-08	0.0575	Jerber2021NG	Jerber-2021-Nat. Genet	rs67539070
10.1038/s41588-021-00801-6	CL_0000700	Cell-type-specific eQTL	-0.31511	Cell Proliferation On Day 52	Dopaminergic Neurons	GNL3	1	chr3:52677515-52677516	4.25595e-08	0.0575	Jerber2021NG	Jerber-2021-Nat. Genet	rs9714129
10.1038/s41588-021-00801-6	CL_0000700	Cell-type-specific eQTL	-0.2928	Cell Proliferation On Day 52	Dopaminergic Neurons	GNL3	1	chr3:52677456-52677457	7.30041e-07	0.05911	Jerber2021NG	Jerber-2021-Nat. Genet	rs13061253
10.1038/s41588-021-00801-6	CL_0000700	Cell-type-specific eQTL	-0.31511	Cell Proliferation On Day 52	Dopaminergic Neurons	GNL3	1	chr3:52676620-52676621	4.25595e-08	0.0575	Jerber2021NG	Jerber-2021-Nat. Genet	rs2336542
10.1038/s41588-021-00801-6	CL_0000700	Cell-type-specific eQTL	-0.2928	Cell Proliferation On Day 52	Dopaminergic Neurons	GNL3	0	chr3:52675815-52675816	7.30041e-07	0.05911	Jerber2021NG	Jerber-2021-Nat. Genet	rs4130905
10.1038/s41588-021-00801-6	CL_0000700	Cell-type-specific eQTL	-0.31511	Cell Proliferation On Day 52	Dopaminergic Neurons	GNL3	1	chr3:52675243-52675244	4.25595e-08	0.0575	Jerber2021NG	Jerber-2021-Nat. Genet	rs12496634
10.1038/s41588-021-00801-6	CL_0000700	Cell-type-specific eQTL	-0.2928	Cell Proliferation On Day 52	Dopaminergic Neurons	GNL3	0	chr3:52674721-52674722	7.30041e-07	0.05911	Jerber2021NG	Jerber-2021-Nat. Genet	rs12496476
10.1038/s41588-021-00801-6	CL_0000700	Cell-type-specific eQTL	-0.2928	Cell Proliferation On Day 52	Dopaminergic Neurons	GNL3	1	chr3:52674413-52674414	7.30041e-07	0.05911	Jerber2021NG	Jerber-2021-Nat. Genet	rs34610142
10.1038/s41588-021-00801-6	CL_0000700	Cell-type-specific eQTL	-0.2928	Cell Proliferation On Day 52	Dopaminergic Neurons	GNL3	1	chr3:52674272-52674273	7.30041e-07	0.05911	Jerber2021NG	Jerber-2021-Nat. Genet	rs12632265
10.1038/s41588-021-00801-6	CL_0000700	Cell-type-specific eQTL	-0.33046	Cell Proliferation On Day 52	Dopaminergic Neurons	GNL3	0	chr3:52674059-52674060	1.63883e-08	0.05853	Jerber2021NG	Jerber-2021-Nat. Genet	rs6414569
10.1038/s41588-021-00801-6	CL_0000700	Cell-type-specific eQTL	-0.3205	Cell Proliferation On Day 52	Dopaminergic Neurons	GNL3	0	chr3:52674057-52674058	2.67567e-08	0.05763	Jerber2021NG	Jerber-2021-Nat. Genet	rs12637632
10.1038/s41588-021-00801-6	CL_0000700	Cell-type-specific eQTL	-0.2928	Cell Proliferation On Day 52	Dopaminergic Neurons	GNL3	1	chr3:52673010-52673011	7.30041e-07	0.05911	Jerber2021NG	Jerber-2021-Nat. Genet	rs6803012
10.1038/s41588-021-00801-6	CL_0000700	Cell-type-specific eQTL	-0.2928	Cell Proliferation On Day 52	Dopaminergic Neurons	GNL3	1	chr3:52672708-52672709	7.30041e-07	0.05911	Jerber2021NG	Jerber-2021-Nat. Genet	rs12493107
10.1038/s41588-021-00801-6	CL_0000700	Cell-type-specific eQTL	-0.2928	Cell Proliferation On Day 52	Dopaminergic Neurons	GNL3	1	chr3:52669599-52669600	7.30041e-07	0.05911	Jerber2021NG	Jerber-2021-Nat. Genet	rs6768697
10.1038/s41588-021-00801-6	CL_0000700	Cell-type-specific eQTL	-0.3165	Cell Proliferation On Day 52	Dopaminergic Neurons	GNL3	1	chr3:52667486-52667487	5.84315e-08	0.05836	Jerber2021NG	Jerber-2021-Nat. Genet	rs62255364
10.1038/s41588-021-00801-6	CL_0000700	Cell-type-specific eQTL	-0.3165	Cell Proliferation On Day 52	Dopaminergic Neurons	GNL3	1	chr3:52667485-52667486	5.84315e-08	0.05836	Jerber2021NG	Jerber-2021-Nat. Genet	rs77146033
10.1038/s41588-021-00801-6	CL_0000700	Cell-type-specific eQTL	-0.28809	Cell Proliferation On Day 52	Dopaminergic Neurons	GNL3	1	chr3:52666461-52666462	2.23042e-06	0.06089	Jerber2021NG	Jerber-2021-Nat. Genet	rs35976524
10.1038/s41588-021-00801-6	CL_0000700	Cell-type-specific eQTL	-0.31511	Cell Proliferation On Day 52	Dopaminergic Neurons	GNL3	1	chr3:52665725-52665726	4.25595e-08	0.0575	Jerber2021NG	Jerber-2021-Nat. Genet	rs62255362
10.1038/s41588-021-00801-6	CL_0000700	Cell-type-specific eQTL	-0.31511	Cell Proliferation On Day 52	Dopaminergic Neurons	GNL3	1	chr3:52664544-52664545	4.25595e-08	0.0575	Jerber2021NG	Jerber-2021-Nat. Genet	rs12488527
10.1038/s41588-021-00801-6	CL_0000700	Cell-type-specific eQTL	-0.2928	Cell Proliferation On Day 52	Dopaminergic Neurons	GNL3	0	chr3:52664401-52664402	7.30041e-07	0.05911	Jerber2021NG	Jerber-2021-Nat. Genet	rs12488461
10.1038/s41588-021-00801-6	CL_0000700	Cell-type-specific eQTL	-0.31511	Cell Proliferation On Day 52	Dopaminergic Neurons	GNL3	1	chr3:52663147-52663148	4.25595e-08	0.0575	Jerber2021NG	Jerber-2021-Nat. Genet	rs11130315
10.1038/s41588-021-00801-6	CL_0000700	Cell-type-specific eQTL	-0.31511	Cell Proliferation On Day 52	Dopaminergic Neurons	GNL3	1	chr3:52663066-52663067	4.25595e-08	0.0575	Jerber2021NG	Jerber-2021-Nat. Genet	rs11130314
10.1038/s41588-021-00801-6	CL_0000700	Cell-type-specific eQTL	-0.31511	Cell Proliferation On Day 52	Dopaminergic Neurons	GNL3	1	chr3:52662782-52662783	4.25595e-08	0.0575	Jerber2021NG	Jerber-2021-Nat. Genet	rs34168767
10.1038/s41588-021-00801-6	CL_0000700	Cell-type-specific eQTL	-0.32243	Cell Proliferation On Day 52	Dopaminergic Neurons	GNL3	1	chr3:52660182-52660183	3.15411e-08	0.05828	Jerber2021NG	Jerber-2021-Nat. Genet	rs6804145
10.1038/s41588-021-00801-6	CL_0000700	Cell-type-specific eQTL	-0.32243	Cell Proliferation On Day 52	Dopaminergic Neurons	GNL3	1	chr3:52658705-52658706	3.15411e-08	0.05828	Jerber2021NG	Jerber-2021-Nat. Genet	rs7611731
10.1038/s41588-021-00801-6	CL_0000700	Cell-type-specific eQTL	-0.31511	Cell Proliferation On Day 52	Dopaminergic Neurons	GNL3	1	chr3:52658343-52658344	4.25595e-08	0.0575	Jerber2021NG	Jerber-2021-Nat. Genet	rs2590846
10.1038/s41588-021-00801-6	CL_0000700	Cell-type-specific eQTL	-0.32243	Cell Proliferation On Day 52	Dopaminergic Neurons	GNL3	1	chr3:52658108-52658109	3.15411e-08	0.05828	Jerber2021NG	Jerber-2021-Nat. Genet	rs2336149
10.1038/s41588-021-00801-6	CL_0000700	Cell-type-specific eQTL	-0.2928	Cell Proliferation On Day 52	Dopaminergic Neurons	GNL3	1	chr3:52657096-52657097	7.30041e-07	0.05911	Jerber2021NG	Jerber-2021-Nat. Genet	rs12486847
10.1038/s41588-021-00801-6	CL_0000700	Cell-type-specific eQTL	-0.2928	Cell Proliferation On Day 52	Dopaminergic Neurons	GNL3	1	chr3:52656622-52656623	7.30041e-07	0.05911	Jerber2021NG	Jerber-2021-Nat. Genet	rs2336148
10.1038/s41588-021-00801-6	CL_0000700	Cell-type-specific eQTL	-0.2928	Cell Proliferation On Day 52	Dopaminergic Neurons	GNL3	1	chr3:52653670-52653671	7.30041e-07	0.05911	Jerber2021NG	Jerber-2021-Nat. Genet	rs35409678
10.1038/s41588-021-00801-6	CL_0000700	Cell-type-specific eQTL	0.36973	Cell Proliferation On Day 52	Dopaminergic Neurons	GNL3	1	chr3:52653550-52653551	1.00875e-11	0.05433	Jerber2021NG	Jerber-2021-Nat. Genet	rs7612511
10.1038/s41588-021-00801-6	CL_0000700	Cell-type-specific eQTL	-0.32243	Cell Proliferation On Day 52	Dopaminergic Neurons	GNL3	1	chr3:52653546-52653547	3.15411e-08	0.05828	Jerber2021NG	Jerber-2021-Nat. Genet	rs4435633
10.1038/s41588-021-00801-6	CL_0000700	Cell-type-specific eQTL	-0.31511	Cell Proliferation On Day 52	Dopaminergic Neurons	GNL3	1	chr3:52652871-52652872	4.25595e-08	0.0575	Jerber2021NG	Jerber-2021-Nat. Genet	rs6770463
10.1038/s41588-021-00801-6	CL_0000700	Cell-type-specific eQTL	0.35666	Cell Proliferation On Day 52	Dopaminergic Neurons	GNL3	1	chr3:52652700-52652701	1.06832e-10	0.05524	Jerber2021NG	Jerber-2021-Nat. Genet	rs2878632
10.1038/s41588-021-00801-6	CL_0000700	Cell-type-specific eQTL	-0.2928	Cell Proliferation On Day 52	Dopaminergic Neurons	GNL3	1	chr3:52651289-52651290	7.30041e-07	0.05911	Jerber2021NG	Jerber-2021-Nat. Genet	rs35211965
10.1038/s41588-021-00801-6	CL_0000700	Cell-type-specific eQTL	-0.31511	Cell Proliferation On Day 52	Dopaminergic Neurons	GNL3	1	chr3:52651228-52651229	4.25595e-08	0.0575	Jerber2021NG	Jerber-2021-Nat. Genet	rs13065019
10.1038/s41588-021-00801-6	CL_0000700	Cell-type-specific eQTL	-0.32243	Cell Proliferation On Day 52	Dopaminergic Neurons	GNL3	1	chr3:52650112-52650113	3.15411e-08	0.05828	Jerber2021NG	Jerber-2021-Nat. Genet	rs62253740
10.1038/s41588-021-00801-6	CL_0000700	Cell-type-specific eQTL	-0.31511	Cell Proliferation On Day 52	Dopaminergic Neurons	GNL3	1	chr3:52649848-52649849	4.25595e-08	0.0575	Jerber2021NG	Jerber-2021-Nat. Genet	rs33967311
10.1038/s41588-021-00801-6	CL_0000700	Cell-type-specific eQTL	-0.31511	Cell Proliferation On Day 52	Dopaminergic Neurons	GNL3	1	chr3:52648930-52648931	4.25595e-08	0.0575	Jerber2021NG	Jerber-2021-Nat. Genet	rs2289250
10.1038/s41588-021-00801-6	CL_0000700	Cell-type-specific eQTL	-0.31511	Cell Proliferation On Day 52	Dopaminergic Neurons	GNL3	1	chr3:52648189-52648190	4.25595e-08	0.0575	Jerber2021NG	Jerber-2021-Nat. Genet	rs34757451
10.1038/s41588-021-00801-6	CL_0000700	Cell-type-specific eQTL	-0.2928	Cell Proliferation On Day 52	Dopaminergic Neurons	GNL3	1	chr3:52646807-52646808	7.30041e-07	0.05911	Jerber2021NG	Jerber-2021-Nat. Genet	rs2028216
10.1038/s41588-021-00801-6	CL_0000700	Cell-type-specific eQTL	-0.31511	Cell Proliferation On Day 52	Dopaminergic Neurons	GNL3	1	chr3:52644478-52644479	4.25595e-08	0.0575	Jerber2021NG	Jerber-2021-Nat. Genet	rs13086297
10.1038/s41588-021-00801-6	CL_0000700	Cell-type-specific eQTL	-0.32243	Cell Proliferation On Day 52	Dopaminergic Neurons	GNL3	1	chr3:52644354-52644355	3.15411e-08	0.05828	Jerber2021NG	Jerber-2021-Nat. Genet	rs13085775
10.1038/s41588-021-00801-6	CL_0000700	Cell-type-specific eQTL	-0.31511	Cell Proliferation On Day 52	Dopaminergic Neurons	GNL3	1	chr3:52644254-52644255	4.25595e-08	0.0575	Jerber2021NG	Jerber-2021-Nat. Genet	rs13085895
10.1038/s41588-021-00801-6	CL_0000700	Cell-type-specific eQTL	-0.31511	Cell Proliferation On Day 52	Dopaminergic Neurons	GNL3	1	chr3:52643944-52643945	4.25595e-08	0.0575	Jerber2021NG	Jerber-2021-Nat. Genet	rs7642198
10.1038/s41588-021-00801-6	CL_0000700	Cell-type-specific eQTL	-0.31511	Cell Proliferation On Day 52	Dopaminergic Neurons	GNL3	1	chr3:52642174-52642175	4.25595e-08	0.0575	Jerber2021NG	Jerber-2021-Nat. Genet	rs11130313
10.1038/s41588-021-00801-6	CL_0000700	Cell-type-specific eQTL	-0.31511	Cell Proliferation On Day 52	Dopaminergic Neurons	GNL3	1	chr3:52641263-52641264	4.25595e-08	0.0575	Jerber2021NG	Jerber-2021-Nat. Genet	rs13086898
10.1038/s41588-021-00801-6	CL_0000700	Cell-type-specific eQTL	-0.31511	Cell Proliferation On Day 52	Dopaminergic Neurons	GNL3	1	chr3:52641039-52641040	4.25595e-08	0.0575	Jerber2021NG	Jerber-2021-Nat. Genet	rs11130312
10.1038/s41588-021-00801-6	CL_0000700	Cell-type-specific eQTL	-0.31511	Cell Proliferation On Day 52	Dopaminergic Neurons	GNL3	1	chr3:52640989-52640990	4.25595e-08	0.0575	Jerber2021NG	Jerber-2021-Nat. Genet	rs11130311
10.1038/s41588-021-00801-6	CL_0000700	Cell-type-specific eQTL	-0.32243	Cell Proliferation On Day 52	Dopaminergic Neurons	GNL3	1	chr3:52640651-52640652	3.15411e-08	0.05828	Jerber2021NG	Jerber-2021-Nat. Genet	rs11130310
10.1038/s41588-021-00801-6	CL_0000700	Cell-type-specific eQTL	-0.31511	Cell Proliferation On Day 52	Dopaminergic Neurons	GNL3	1	chr3:52640526-52640527	4.25595e-08	0.0575	Jerber2021NG	Jerber-2021-Nat. Genet	rs13081031
10.1038/s41588-021-00801-6	CL_0000700	Cell-type-specific eQTL	-0.31511	Cell Proliferation On Day 52	Dopaminergic Neurons	GNL3	0	chr3:52640284-52640285	4.25595e-08	0.0575	Jerber2021NG	Jerber-2021-Nat. Genet	rs13060675
10.1038/s41588-021-00801-6	CL_0000700	Cell-type-specific eQTL	-0.2928	Cell Proliferation On Day 52	Dopaminergic Neurons	GNL3	1	chr3:52638726-52638727	7.30041e-07	0.05911	Jerber2021NG	Jerber-2021-Nat. Genet	rs11720432
10.1038/s41588-021-00801-6	CL_0000700	Cell-type-specific eQTL	-0.2928	Cell Proliferation On Day 52	Dopaminergic Neurons	GNL3	1	chr3:52638515-52638516	7.30041e-07	0.05911	Jerber2021NG	Jerber-2021-Nat. Genet	rs11719514
10.1038/s41588-021-00801-6	CL_0000700	Cell-type-specific eQTL	-0.31511	Cell Proliferation On Day 52	Dopaminergic Neurons	GNL3	1	chr3:52638151-52638152	4.25595e-08	0.0575	Jerber2021NG	Jerber-2021-Nat. Genet	rs13068293
10.1038/s41588-021-00801-6	CL_0000700	Cell-type-specific eQTL	-0.32243	Cell Proliferation On Day 52	Dopaminergic Neurons	GNL3	1	chr3:52636028-52636029	3.15411e-08	0.05828	Jerber2021NG	Jerber-2021-Nat. Genet	rs13098776
10.1038/s41588-021-00801-6	CL_0000700	Cell-type-specific eQTL	-0.32243	Cell Proliferation On Day 52	Dopaminergic Neurons	GNL3	1	chr3:52635373-52635374	3.15411e-08	0.05828	Jerber2021NG	Jerber-2021-Nat. Genet	rs6796726
10.1038/s41588-021-00801-6	CL_0000700	Cell-type-specific eQTL	-0.33542	Cell Proliferation On Day 52	Dopaminergic Neurons	GNL3	1	chr3:52634103-52634104	1.91400e-08	0.05969	Jerber2021NG	Jerber-2021-Nat. Genet	rs2083180
10.1038/s41588-021-00801-6	CL_0000700	Cell-type-specific eQTL	-0.31511	Cell Proliferation On Day 52	Dopaminergic Neurons	GNL3	1	chr3:52632850-52632851	4.25595e-08	0.0575	Jerber2021NG	Jerber-2021-Nat. Genet	rs13069481
10.1038/s41588-021-00801-6	CL_0000700	Cell-type-specific eQTL	-0.31511	Cell Proliferation On Day 52	Dopaminergic Neurons	GNL3	1	chr3:52632634-52632635	4.25595e-08	0.0575	Jerber2021NG	Jerber-2021-Nat. Genet	rs4687548
10.1038/s41588-021-00801-6	CL_0000700	Cell-type-specific eQTL	-0.32243	Cell Proliferation On Day 52	Dopaminergic Neurons	GNL3	1	chr3:52629866-52629867	3.15411e-08	0.05828	Jerber2021NG	Jerber-2021-Nat. Genet	rs7622694
10.1038/s41588-021-00801-6	CL_0000700	Cell-type-specific eQTL	-0.32243	Cell Proliferation On Day 52	Dopaminergic Neurons	GNL3	1	chr3:52628706-52628707	3.15411e-08	0.05828	Jerber2021NG	Jerber-2021-Nat. Genet	rs6445529
10.1038/s41588-021-00801-6	CL_0000700	Cell-type-specific eQTL	-0.31511	Cell Proliferation On Day 52	Dopaminergic Neurons	GNL3	1	chr3:52627624-52627625	4.25595e-08	0.0575	Jerber2021NG	Jerber-2021-Nat. Genet	rs35249778
10.1038/s41588-021-00801-6	CL_0000700	Cell-type-specific eQTL	-0.31511	Cell Proliferation On Day 52	Dopaminergic Neurons	GNL3	1	chr3:52625947-52625948	4.25595e-08	0.0575	Jerber2021NG	Jerber-2021-Nat. Genet	rs1561337
10.1038/s41588-021-00801-6	CL_0000700	Cell-type-specific eQTL	-0.31511	Cell Proliferation On Day 52	Dopaminergic Neurons	GNL3	1	chr3:52625108-52625109	4.25595e-08	0.0575	Jerber2021NG	Jerber-2021-Nat. Genet	rs34215106
10.1038/s41588-021-00801-6	CL_0000700	Cell-type-specific eQTL	-0.2928	Cell Proliferation On Day 52	Dopaminergic Neurons	GNL3	1	chr3:52623456-52623457	7.30041e-07	0.05911	Jerber2021NG	Jerber-2021-Nat. Genet	rs34537256
10.1038/s41588-021-00801-6	CL_0000700	Cell-type-specific eQTL	-0.31511	Cell Proliferation On Day 52	Dopaminergic Neurons	GNL3	1	chr3:52622986-52622987	4.25595e-08	0.0575	Jerber2021NG	Jerber-2021-Nat. Genet	rs13064064
10.1038/s41588-021-00801-6	CL_0000700	Cell-type-specific eQTL	-0.31511	Cell Proliferation On Day 52	Dopaminergic Neurons	GNL3	1	chr3:52622324-52622325	4.25595e-08	0.0575	Jerber2021NG	Jerber-2021-Nat. Genet	rs4687639
10.1038/s41588-021-00801-6	CL_0000700	Cell-type-specific eQTL	-0.31511	Cell Proliferation On Day 52	Dopaminergic Neurons	GNL3	1	chr3:52622076-52622077	4.25595e-08	0.0575	Jerber2021NG	Jerber-2021-Nat. Genet	rs11717043
10.1038/s41588-021-00801-6	CL_0000700	Cell-type-specific eQTL	-0.32243	Cell Proliferation On Day 52	Dopaminergic Neurons	GNL3	1	chr3:52621399-52621400	3.15411e-08	0.05828	Jerber2021NG	Jerber-2021-Nat. Genet	rs34341238
10.1038/s41588-021-00801-6	CL_0000700	Cell-type-specific eQTL	-0.2928	Cell Proliferation On Day 52	Dopaminergic Neurons	GNL3	1	chr3:52619398-52619399	7.30041e-07	0.05911	Jerber2021NG	Jerber-2021-Nat. Genet	rs62253733
10.1038/s41588-021-00801-6	CL_0000700	Cell-type-specific eQTL	-0.2928	Cell Proliferation On Day 52	Dopaminergic Neurons	GNL3	0	chr3:52617950-52617951	7.30041e-07	0.05911	Jerber2021NG	Jerber-2021-Nat. Genet	rs4687638
10.1038/s41588-021-00801-6	CL_0000700	Cell-type-specific eQTL	-0.28809	Cell Proliferation On Day 52	Dopaminergic Neurons	GNL3	1	chr3:52616332-52616333	2.23042e-06	0.06089	Jerber2021NG	Jerber-2021-Nat. Genet	rs10510760
10.1038/s41588-021-00801-6	CL_0000700	Cell-type-specific eQTL	-0.35765	Cell Proliferation On Day 52	Dopaminergic Neurons	GNL3	1	chr3:52615732-52615733	3.33982e-11	0.05394	Jerber2021NG	Jerber-2021-Nat. Genet	rs13083798
10.1038/s41588-021-00801-6	CL_0000700	Cell-type-specific eQTL	-0.35526	Cell Proliferation On Day 52	Dopaminergic Neurons	GNL3	1	chr3:52614249-52614250	2.72530e-11	0.05334	Jerber2021NG	Jerber-2021-Nat. Genet	rs9879090
10.1038/s41588-021-00801-6	CL_0000700	Cell-type-specific eQTL	-0.2928	Cell Proliferation On Day 52	Dopaminergic Neurons	GNL3	1	chr3:52613433-52613434	7.30041e-07	0.05911	Jerber2021NG	Jerber-2021-Nat. Genet	rs11709448
10.1038/s41588-021-00801-6	CL_0000700	Cell-type-specific eQTL	-0.2928	Cell Proliferation On Day 52	Dopaminergic Neurons	GNL3	1	chr3:52610820-52610821	7.30041e-07	0.05911	Jerber2021NG	Jerber-2021-Nat. Genet	rs13065851
10.1038/s41588-021-00801-6	CL_0000700	Cell-type-specific eQTL	-0.31511	Cell Proliferation On Day 52	Dopaminergic Neurons	GNL3	1	chr3:52609669-52609670	4.25595e-08	0.0575	Jerber2021NG	Jerber-2021-Nat. Genet	rs3755806
10.1038/s41588-021-00801-6	CL_0000700	Cell-type-specific eQTL	-0.32243	Cell Proliferation On Day 52	Dopaminergic Neurons	GNL3	1	chr3:52609291-52609292	3.15411e-08	0.05828	Jerber2021NG	Jerber-2021-Nat. Genet	rs3733045
10.1038/s41588-021-00801-6	CL_0000700	Cell-type-specific eQTL	-0.31511	Cell Proliferation On Day 52	Dopaminergic Neurons	GNL3	1	chr3:52608920-52608921	4.25595e-08	0.0575	Jerber2021NG	Jerber-2021-Nat. Genet	rs12487591
10.1038/s41588-021-00801-6	CL_0000700	Cell-type-specific eQTL	-0.31511	Cell Proliferation On Day 52	Dopaminergic Neurons	GNL3	1	chr3:52608471-52608472	4.25595e-08	0.0575	Jerber2021NG	Jerber-2021-Nat. Genet	rs3774365
10.1038/s41588-021-00801-6	CL_0000700	Cell-type-specific eQTL	-0.32243	Cell Proliferation On Day 52	Dopaminergic Neurons	GNL3	1	chr3:52607239-52607240	3.15411e-08	0.05828	Jerber2021NG	Jerber-2021-Nat. Genet	rs3774366
10.1038/s41588-021-00801-6	CL_0000700	Cell-type-specific eQTL	-0.29851	Cell Proliferation On Day 52	Dopaminergic Neurons	GNL3	1	chr3:52605241-52605242	1.82988e-07	0.05723	Jerber2021NG	Jerber-2021-Nat. Genet	rs11130308
10.1038/s41588-021-00801-6	CL_0000700	Cell-type-specific eQTL	-0.31511	Cell Proliferation On Day 52	Dopaminergic Neurons	GNL3	1	chr3:52604466-52604467	4.25595e-08	0.0575	Jerber2021NG	Jerber-2021-Nat. Genet	rs10433615
10.1038/s41588-021-00801-6	CL_0000700	Cell-type-specific eQTL	-0.35526	Cell Proliferation On Day 52	Dopaminergic Neurons	GNL3	1	chr3:52603470-52603471	2.72530e-11	0.05334	Jerber2021NG	Jerber-2021-Nat. Genet	rs2276824
10.1038/s41588-021-00801-6	CL_0000700	Cell-type-specific eQTL	-0.32243	Cell Proliferation On Day 52	Dopaminergic Neurons	GNL3	1	chr3:52600603-52600604	3.15411e-08	0.05828	Jerber2021NG	Jerber-2021-Nat. Genet	rs9917834
10.1038/s41588-021-00801-6	CL_0000700	Cell-type-specific eQTL	-0.2928	Cell Proliferation On Day 52	Dopaminergic Neurons	GNL3	1	chr3:52600589-52600590	7.30041e-07	0.05911	Jerber2021NG	Jerber-2021-Nat. Genet	rs34173654
10.1038/s41588-021-00801-6	CL_0000700	Cell-type-specific eQTL	-0.32201	Cell Proliferation On Day 52	Dopaminergic Neurons	GNL3	1	chr3:52600076-52600077	5.32671e-08	0.05919	Jerber2021NG	Jerber-2021-Nat. Genet	rs4687637
10.1038/s41588-021-00801-6	CL_0000700	Cell-type-specific eQTL	-0.2928	Cell Proliferation On Day 52	Dopaminergic Neurons	GNL3	1	chr3:52599913-52599914	7.30041e-07	0.05911	Jerber2021NG	Jerber-2021-Nat. Genet	rs4687636
10.1038/s41588-021-00801-6	CL_0000700	Cell-type-specific eQTL	-0.31511	Cell Proliferation On Day 52	Dopaminergic Neurons	GNL3	1	chr3:52598895-52598896	4.25595e-08	0.0575	Jerber2021NG	Jerber-2021-Nat. Genet	rs6790330
10.1038/s41588-021-00801-6	CL_0000700	Cell-type-specific eQTL	-0.31511	Cell Proliferation On Day 52	Dopaminergic Neurons	GNL3	1	chr3:52598341-52598342	4.25595e-08	0.0575	Jerber2021NG	Jerber-2021-Nat. Genet	rs62253703
10.1038/s41588-021-00801-6	CL_0000700	Cell-type-specific eQTL	-0.31511	Cell Proliferation On Day 52	Dopaminergic Neurons	GNL3	1	chr3:52596532-52596533	4.25595e-08	0.0575	Jerber2021NG	Jerber-2021-Nat. Genet	rs4687633
10.1038/s41588-021-00801-6	CL_0000700	Cell-type-specific eQTL	-0.2928	Cell Proliferation On Day 52	Dopaminergic Neurons	GNL3	1	chr3:52595734-52595735	7.30041e-07	0.05911	Jerber2021NG	Jerber-2021-Nat. Genet	rs2336145
10.1038/s41588-021-00801-6	CL_0000700	Cell-type-specific eQTL	-0.31511	Cell Proliferation On Day 52	Dopaminergic Neurons	GNL3	1	chr3:52595617-52595618	4.25595e-08	0.0575	Jerber2021NG	Jerber-2021-Nat. Genet	rs2164884
10.1038/s41588-021-00801-6	CL_0000700	Cell-type-specific eQTL	-0.2928	Cell Proliferation On Day 52	Dopaminergic Neurons	GNL3	1	chr3:52595370-52595371	7.30041e-07	0.05911	Jerber2021NG	Jerber-2021-Nat. Genet	rs2118540
10.1038/s41588-021-00801-6	CL_0000700	Cell-type-specific eQTL	-0.32243	Cell Proliferation On Day 52	Dopaminergic Neurons	GNL3	1	chr3:52595161-52595162	3.15411e-08	0.05828	Jerber2021NG	Jerber-2021-Nat. Genet	rs34754793
10.1038/s41588-021-00801-6	CL_0000700	Cell-type-specific eQTL	-0.2928	Cell Proliferation On Day 52	Dopaminergic Neurons	GNL3	1	chr3:52594800-52594801	7.30041e-07	0.05911	Jerber2021NG	Jerber-2021-Nat. Genet	rs11714419
10.1038/s41588-021-00801-6	CL_0000700	Cell-type-specific eQTL	-0.31943	Cell Proliferation On Day 52	Dopaminergic Neurons	GNL3	1	chr3:52594305-52594306	1.53756e-08	0.05646	Jerber2021NG	Jerber-2021-Nat. Genet	rs7628578
10.1038/s41588-021-00801-6	CL_0000700	Cell-type-specific eQTL	-0.35522	Cell Proliferation On Day 52	Dopaminergic Neurons	GNL3	1	chr3:52594040-52594041	1.01507e-11	0.05221	Jerber2021NG	Jerber-2021-Nat. Genet	rs2577831
10.1038/s41588-021-00801-6	CL_0000700	Cell-type-specific eQTL	-0.31511	Cell Proliferation On Day 52	Dopaminergic Neurons	GNL3	1	chr3:52593644-52593645	4.25595e-08	0.0575	Jerber2021NG	Jerber-2021-Nat. Genet	rs12498066
10.1038/s41588-021-00801-6	CL_0000700	Cell-type-specific eQTL	-0.31511	Cell Proliferation On Day 52	Dopaminergic Neurons	GNL3	1	chr3:52593470-52593471	4.25595e-08	0.0575	Jerber2021NG	Jerber-2021-Nat. Genet	rs13085331
10.1038/s41588-021-00801-6	CL_0000700	Cell-type-specific eQTL	-0.32243	Cell Proliferation On Day 52	Dopaminergic Neurons	GNL3	1	chr3:52592630-52592631	3.15411e-08	0.05828	Jerber2021NG	Jerber-2021-Nat. Genet	rs2336146
10.1038/s41588-021-00801-6	CL_0000700	Cell-type-specific eQTL	-0.36973	Cell Proliferation On Day 52	Dopaminergic Neurons	GNL3	1	chr3:52592427-52592428	1.00875e-11	0.05433	Jerber2021NG	Jerber-2021-Nat. Genet	rs2336147
10.1038/s41588-021-00801-6	CL_0000700	Cell-type-specific eQTL	-0.31511	Cell Proliferation On Day 52	Dopaminergic Neurons	GNL3	1	chr3:52591003-52591004	4.25595e-08	0.0575	Jerber2021NG	Jerber-2021-Nat. Genet	rs62253700
10.1038/s41588-021-00801-6	CL_0000700	Cell-type-specific eQTL	-0.31511	Cell Proliferation On Day 52	Dopaminergic Neurons	GNL3	1	chr3:52590753-52590754	4.25595e-08	0.0575	Jerber2021NG	Jerber-2021-Nat. Genet	rs68021750
10.1038/s41588-021-00801-6	CL_0000700	Cell-type-specific eQTL	-0.2928	Cell Proliferation On Day 52	Dopaminergic Neurons	GNL3	1	chr3:52590707-52590708	7.30041e-07	0.05911	Jerber2021NG	Jerber-2021-Nat. Genet	rs11708075
10.1038/s41588-021-00801-6	CL_0000700	Cell-type-specific eQTL	-0.2928	Cell Proliferation On Day 52	Dopaminergic Neurons	GNL3	1	chr3:52590217-52590218	7.30041e-07	0.05911	Jerber2021NG	Jerber-2021-Nat. Genet	rs4336110
10.1038/s41588-021-00801-6	CL_0000700	Cell-type-specific eQTL	-0.36973	Cell Proliferation On Day 52	Dopaminergic Neurons	GNL3	1	chr3:52588070-52588071	1.00875e-11	0.05433	Jerber2021NG	Jerber-2021-Nat. Genet	rs2590838
10.1038/s41588-021-00801-6	CL_0000700	Cell-type-specific eQTL	-0.32243	Cell Proliferation On Day 52	Dopaminergic Neurons	GNL3	1	chr3:52587823-52587824	3.15411e-08	0.05828	Jerber2021NG	Jerber-2021-Nat. Genet	rs3852066
10.1038/s41588-021-00801-6	CL_0000700	Cell-type-specific eQTL	-0.32243	Cell Proliferation On Day 52	Dopaminergic Neurons	GNL3	1	chr3:52587611-52587612	3.15411e-08	0.05828	Jerber2021NG	Jerber-2021-Nat. Genet	rs3733046
10.1038/s41588-021-00801-6	CL_0000700	Cell-type-specific eQTL	-0.32614	Cell Proliferation On Day 52	Dopaminergic Neurons	GNL3	0	chr3:52585946-52585947	2.73577e-08	0.05868	Jerber2021NG	Jerber-2021-Nat. Genet	rs12637627
10.1038/s41588-021-00801-6	CL_0000700	Cell-type-specific eQTL	-0.3262	Cell Proliferation On Day 52	Dopaminergic Neurons	GNL3	1	chr3:52585820-52585821	4.53582e-08	0.05965	Jerber2021NG	Jerber-2021-Nat. Genet	rs12629701
10.1038/s41588-021-00801-6	CL_0000700	Cell-type-specific eQTL	-0.32614	Cell Proliferation On Day 52	Dopaminergic Neurons	GNL3	1	chr3:52585776-52585777	2.73577e-08	0.05868	Jerber2021NG	Jerber-2021-Nat. Genet	rs12629699
10.1038/s41588-021-00801-6	CL_0000700	Cell-type-specific eQTL	-0.32614	Cell Proliferation On Day 52	Dopaminergic Neurons	GNL3	0	chr3:52584925-52584926	2.73577e-08	0.05868	Jerber2021NG	Jerber-2021-Nat. Genet	rs7614498
10.1038/s41588-021-00801-6	CL_0000700	Cell-type-specific eQTL	-0.2979	Cell Proliferation On Day 52	Dopaminergic Neurons	GNL3	1	chr3:52584303-52584304	6.04706e-07	0.0597	Jerber2021NG	Jerber-2021-Nat. Genet	rs12487445
10.1038/s41588-021-00801-6	CL_0000700	Cell-type-specific eQTL	-0.32614	Cell Proliferation On Day 52	Dopaminergic Neurons	GNL3	1	chr3:52584002-52584003	2.73577e-08	0.05868	Jerber2021NG	Jerber-2021-Nat. Genet	rs11720243
10.1038/s41588-021-00801-6	CL_0000700	Cell-type-specific eQTL	-0.32614	Cell Proliferation On Day 52	Dopaminergic Neurons	GNL3	1	chr3:52583786-52583787	2.73577e-08	0.05868	Jerber2021NG	Jerber-2021-Nat. Genet	rs11720159
10.1038/s41588-021-00801-6	CL_0000700	Cell-type-specific eQTL	-0.36639	Cell Proliferation On Day 52	Dopaminergic Neurons	GNL3	1	chr3:52583272-52583273	4.20098e-05	0.08945	Jerber2021NG	Jerber-2021-Nat. Genet	rs6799490
10.1038/s41588-021-00801-6	CL_0000700	Cell-type-specific eQTL	-0.2979	Cell Proliferation On Day 52	Dopaminergic Neurons	GNL3	1	chr3:52582962-52582963	6.04706e-07	0.0597	Jerber2021NG	Jerber-2021-Nat. Genet	rs13078422
10.1038/s41588-021-00801-6	CL_0000700	Cell-type-specific eQTL	-0.31836	Cell Proliferation On Day 52	Dopaminergic Neurons	GNL3	1	chr3:52581285-52581286	3.77703e-08	0.05787	Jerber2021NG	Jerber-2021-Nat. Genet	rs4687630
10.1038/s41588-021-00801-6	CL_0000700	Cell-type-specific eQTL	-0.32614	Cell Proliferation On Day 52	Dopaminergic Neurons	GNL3	1	chr3:52581211-52581212	2.73577e-08	0.05868	Jerber2021NG	Jerber-2021-Nat. Genet	rs4687629
10.1038/s41588-021-00801-6	CL_0000700	Cell-type-specific eQTL	-0.31836	Cell Proliferation On Day 52	Dopaminergic Neurons	GNL3	1	chr3:52580654-52580655	3.77703e-08	0.05787	Jerber2021NG	Jerber-2021-Nat. Genet	rs11718509
10.1038/s41588-021-00801-6	CL_0000700	Cell-type-specific eQTL	-0.2979	Cell Proliferation On Day 52	Dopaminergic Neurons	GNL3	1	chr3:52579640-52579641	6.04706e-07	0.0597	Jerber2021NG	Jerber-2021-Nat. Genet	rs35107891
10.1038/s41588-021-00801-6	CL_0000700	Cell-type-specific eQTL	-0.2979	Cell Proliferation On Day 52	Dopaminergic Neurons	GNL3	1	chr3:52578162-52578163	6.04706e-07	0.0597	Jerber2021NG	Jerber-2021-Nat. Genet	rs34115864
10.1038/s41588-021-00801-6	CL_0000700	Cell-type-specific eQTL	-0.31836	Cell Proliferation On Day 52	Dopaminergic Neurons	GNL3	1	chr3:52578143-52578144	3.77703e-08	0.05787	Jerber2021NG	Jerber-2021-Nat. Genet	rs34954168
10.1038/s41588-021-00801-6	CL_0000700	Cell-type-specific eQTL	-0.3262	Cell Proliferation On Day 52	Dopaminergic Neurons	GNL3	1	chr3:52577397-52577398	4.53582e-08	0.05965	Jerber2021NG	Jerber-2021-Nat. Genet	rs11718420
10.1038/s41588-021-00801-6	CL_0000700	Cell-type-specific eQTL	-0.2979	Cell Proliferation On Day 52	Dopaminergic Neurons	GNL3	1	chr3:52576635-52576636	6.04706e-07	0.0597	Jerber2021NG	Jerber-2021-Nat. Genet	rs17264436
10.1038/s41588-021-00801-6	CL_0000700	Cell-type-specific eQTL	-0.32614	Cell Proliferation On Day 52	Dopaminergic Neurons	GNL3	1	chr3:52576399-52576400	2.73577e-08	0.05868	Jerber2021NG	Jerber-2021-Nat. Genet	rs7652191
10.1038/s41588-021-00801-6	CL_0000700	Cell-type-specific eQTL	-0.32376	Cell Proliferation On Day 52	Dopaminergic Neurons	GNL3	0	chr3:52575694-52575695	7.56870e-08	0.06021	Jerber2021NG	Jerber-2021-Nat. Genet	rs6805539
10.1038/s41588-021-00801-6	CL_0000700	Cell-type-specific eQTL	-0.32614	Cell Proliferation On Day 52	Dopaminergic Neurons	GNL3	1	chr3:52575346-52575347	2.73577e-08	0.05868	Jerber2021NG	Jerber-2021-Nat. Genet	rs6805156
10.1038/s41588-021-00801-6	CL_0000700	Cell-type-specific eQTL	-0.31836	Cell Proliferation On Day 52	Dopaminergic Neurons	GNL3	1	chr3:52575141-52575142	3.77703e-08	0.05787	Jerber2021NG	Jerber-2021-Nat. Genet	rs6762457
10.1038/s41588-021-00801-6	CL_0000700	Cell-type-specific eQTL	-0.31836	Cell Proliferation On Day 52	Dopaminergic Neurons	GNL3	1	chr3:52574933-52574934	3.77703e-08	0.05787	Jerber2021NG	Jerber-2021-Nat. Genet	rs4687547
10.1038/s41588-021-00801-6	CL_0000700	Cell-type-specific eQTL	-0.2979	Cell Proliferation On Day 52	Dopaminergic Neurons	GNL3	1	chr3:52573669-52573670	6.04706e-07	0.0597	Jerber2021NG	Jerber-2021-Nat. Genet	rs12632381
10.1038/s41588-021-00801-6	CL_0000700	Cell-type-specific eQTL	-0.2979	Cell Proliferation On Day 52	Dopaminergic Neurons	GNL3	1	chr3:52573666-52573667	6.04706e-07	0.0597	Jerber2021NG	Jerber-2021-Nat. Genet	rs11130307
10.1038/s41588-021-00801-6	CL_0000700	Cell-type-specific eQTL	-0.32614	Cell Proliferation On Day 52	Dopaminergic Neurons	GNL3	1	chr3:52572350-52572351	2.73577e-08	0.05868	Jerber2021NG	Jerber-2021-Nat. Genet	rs7625743
10.1038/s41588-021-00801-6	CL_0000700	Cell-type-specific eQTL	-0.3262	Cell Proliferation On Day 52	Dopaminergic Neurons	GNL3	1	chr3:52572276-52572277	4.53582e-08	0.05965	Jerber2021NG	Jerber-2021-Nat. Genet	rs11714565
10.1038/s41588-021-00801-6	CL_0000700	Cell-type-specific eQTL	-0.2979	Cell Proliferation On Day 52	Dopaminergic Neurons	GNL3	1	chr3:52571958-52571959	6.04706e-07	0.0597	Jerber2021NG	Jerber-2021-Nat. Genet	rs7623199
10.1038/s41588-021-00801-6	CL_0000700	Cell-type-specific eQTL	-0.3262	Cell Proliferation On Day 52	Dopaminergic Neurons	GNL3	1	chr3:52571927-52571928	4.53582e-08	0.05965	Jerber2021NG	Jerber-2021-Nat. Genet	rs4687546
10.1038/s41588-021-00801-6	CL_0000700	Cell-type-specific eQTL	-0.3262	Cell Proliferation On Day 52	Dopaminergic Neurons	GNL3	1	chr3:52571120-52571121	4.53582e-08	0.05965	Jerber2021NG	Jerber-2021-Nat. Genet	rs6788993
10.1038/s41588-021-00801-6	CL_0000700	Cell-type-specific eQTL	-0.32589	Cell Proliferation On Day 52	Dopaminergic Neurons	GNL3	1	chr3:52570989-52570990	5.46532e-08	0.05996	Jerber2021NG	Jerber-2021-Nat. Genet	rs6788887
10.1038/s41588-021-00801-6	CL_0000700	Cell-type-specific eQTL	-0.32614	Cell Proliferation On Day 52	Dopaminergic Neurons	GNL3	1	chr3:52570845-52570846	2.73577e-08	0.05868	Jerber2021NG	Jerber-2021-Nat. Genet	rs6786043
10.1038/s41588-021-00801-6	CL_0000700	Cell-type-specific eQTL	-0.3262	Cell Proliferation On Day 52	Dopaminergic Neurons	GNL3	1	chr3:52570164-52570165	4.53582e-08	0.05965	Jerber2021NG	Jerber-2021-Nat. Genet	rs9758945
10.1038/s41588-021-00801-6	CL_0000700	Cell-type-specific eQTL	-0.3262	Cell Proliferation On Day 52	Dopaminergic Neurons	GNL3	1	chr3:52569336-52569337	4.53582e-08	0.05965	Jerber2021NG	Jerber-2021-Nat. Genet	rs10433550
10.1038/s41588-021-00801-6	CL_0000700	Cell-type-specific eQTL	-0.32614	Cell Proliferation On Day 52	Dopaminergic Neurons	GNL3	1	chr3:52568258-52568259	2.73577e-08	0.05868	Jerber2021NG	Jerber-2021-Nat. Genet	rs13063160
10.1038/s41588-021-00801-6	CL_0000700	Cell-type-specific eQTL	-0.32614	Cell Proliferation On Day 52	Dopaminergic Neurons	GNL3	1	chr3:52566983-52566984	2.73577e-08	0.05868	Jerber2021NG	Jerber-2021-Nat. Genet	rs1821879
10.1038/s41588-021-00801-6	CL_0000700	Cell-type-specific eQTL	-0.2979	Cell Proliferation On Day 52	Dopaminergic Neurons	GNL3	1	chr3:52565906-52565907	6.04706e-07	0.0597	Jerber2021NG	Jerber-2021-Nat. Genet	rs6798246
10.1038/s41588-021-00801-6	CL_0000700	Cell-type-specific eQTL	-0.3262	Cell Proliferation On Day 52	Dopaminergic Neurons	GNL3	1	chr3:52565773-52565774	4.53582e-08	0.05965	Jerber2021NG	Jerber-2021-Nat. Genet	rs6786919
10.1038/s41588-021-00801-6	CL_0000700	Cell-type-specific eQTL	-0.3262	Cell Proliferation On Day 52	Dopaminergic Neurons	GNL3	1	chr3:52564592-52564593	4.53582e-08	0.05965	Jerber2021NG	Jerber-2021-Nat. Genet	rs13060048
10.1038/s41588-021-00801-6	CL_0000700	Cell-type-specific eQTL	-0.32614	Cell Proliferation On Day 52	Dopaminergic Neurons	GNL3	1	chr3:52564524-52564525	2.73577e-08	0.05868	Jerber2021NG	Jerber-2021-Nat. Genet	rs13059862
10.1038/s41588-021-00801-6	CL_0000700	Cell-type-specific eQTL	-0.2979	Cell Proliferation On Day 52	Dopaminergic Neurons	GNL3	1	chr3:52563648-52563649	6.04706e-07	0.0597	Jerber2021NG	Jerber-2021-Nat. Genet	rs2289249
10.1038/s41588-021-00801-6	CL_0000700	Cell-type-specific eQTL	-0.32796	Cell Proliferation On Day 52	Dopaminergic Neurons	GNL3	1	chr3:52562898-52562899	1.58110e-08	0.05802	Jerber2021NG	Jerber-2021-Nat. Genet	rs33964154
10.1038/s41588-021-00801-6	CL_0000700	Cell-type-specific eQTL	-0.2979	Cell Proliferation On Day 52	Dopaminergic Neurons	GNL3	1	chr3:52562382-52562383	6.04706e-07	0.0597	Jerber2021NG	Jerber-2021-Nat. Genet	rs6778844
10.1038/s41588-021-00801-6	CL_0000700	Cell-type-specific eQTL	-0.3262	Cell Proliferation On Day 52	Dopaminergic Neurons	GNL3	1	chr3:52559214-52559215	4.53582e-08	0.05965	Jerber2021NG	Jerber-2021-Nat. Genet	rs3796353
10.1038/s41588-021-00801-6	CL_0000700	Cell-type-specific eQTL	-0.3262	Cell Proliferation On Day 52	Dopaminergic Neurons	GNL3	1	chr3:52559122-52559123	4.53582e-08	0.05965	Jerber2021NG	Jerber-2021-Nat. Genet	rs17052259
10.1038/s41588-021-00801-6	CL_0000700	Cell-type-specific eQTL	-0.3262	Cell Proliferation On Day 52	Dopaminergic Neurons	GNL3	1	chr3:52559103-52559104	4.53582e-08	0.05965	Jerber2021NG	Jerber-2021-Nat. Genet	rs17052256
10.1038/s41588-021-00801-6	CL_0000700	Cell-type-specific eQTL	-0.36383	Cell Proliferation On Day 52	Dopaminergic Neurons	GNL3	1	chr3:52553371-52553372	4.70164e-05	0.08939	Jerber2021NG	Jerber-2021-Nat. Genet	rs3774367
10.1038/s41588-021-00801-6	CL_0000700	Cell-type-specific eQTL	-0.3262	Cell Proliferation On Day 52	Dopaminergic Neurons	GNL3	1	chr3:52552666-52552667	4.53582e-08	0.05965	Jerber2021NG	Jerber-2021-Nat. Genet	rs1570
10.1038/s41588-021-00801-6	CL_0000700	Cell-type-specific eQTL	-0.2979	Cell Proliferation On Day 52	Dopaminergic Neurons	GNL3	1	chr3:52551974-52551975	6.04706e-07	0.0597	Jerber2021NG	Jerber-2021-Nat. Genet	rs1961958
10.1038/s41588-021-00801-6	CL_0000700	Cell-type-specific eQTL	-0.2979	Cell Proliferation On Day 52	Dopaminergic Neurons	GNL3	1	chr3:52551744-52551745	6.04706e-07	0.0597	Jerber2021NG	Jerber-2021-Nat. Genet	rs1961959
10.1038/s41588-021-00801-6	CL_0000700	Cell-type-specific eQTL	-0.31459	Cell Proliferation On Day 52	Dopaminergic Neurons	GNL3	1	chr3:52550771-52550772	5.67056e-08	0.05795	Jerber2021NG	Jerber-2021-Nat. Genet	rs2251219
10.1038/s41588-021-00801-6	CL_0000700	Cell-type-specific eQTL	-0.3262	Cell Proliferation On Day 52	Dopaminergic Neurons	GNL3	1	chr3:52550699-52550700	4.53582e-08	0.05965	Jerber2021NG	Jerber-2021-Nat. Genet	rs2878628
10.1038/s41588-021-00801-6	CL_0000700	Cell-type-specific eQTL	-0.27432	Cell Proliferation On Day 52	Dopaminergic Neurons	GNL3	1	chr3:52547419-52547420	1.41675e-05	0.06319	Jerber2021NG	Jerber-2021-Nat. Genet	rs3199918
10.1038/s41588-021-00801-6	CL_0000700	Cell-type-specific eQTL	-0.36383	Cell Proliferation On Day 52	Dopaminergic Neurons	GNL3	1	chr3:52545272-52545273	4.70164e-05	0.08939	Jerber2021NG	Jerber-2021-Nat. Genet	rs6802671
10.1038/s41588-021-00801-6	CL_0000700	Cell-type-specific eQTL	-0.27561	Cell Proliferation On Day 52	Dopaminergic Neurons	GNL3	1	chr3:52541815-52541816	8.08300e-06	0.06176	Jerber2021NG	Jerber-2021-Nat. Genet	rs1133415
10.1038/s41588-021-00801-6	CL_0000700	Cell-type-specific eQTL	-0.24198	Cell Proliferation On Day 52	Dopaminergic Neurons	GNL3	1	chr3:52539828-52539829	5.28521e-05	0.05986	Jerber2021NG	Jerber-2021-Nat. Genet	rs62256903
10.1038/s41588-021-00801-6	CL_0000700	Cell-type-specific eQTL	-0.23821	Cell Proliferation On Day 52	Dopaminergic Neurons	GNL3	1	chr3:52539080-52539081	8.63660e-05	0.06068	Jerber2021NG	Jerber-2021-Nat. Genet	rs13076398
10.1038/s41588-021-00801-6	CL_0000700	Cell-type-specific eQTL	-0.28018	Cell Proliferation On Day 52	Dopaminergic Neurons	GNL3	1	chr3:52538431-52538432	4.42655e-06	0.06104	Jerber2021NG	Jerber-2021-Nat. Genet	rs6445528
10.1038/s41588-021-00801-6	CL_0000700	Cell-type-specific eQTL	-0.28448	Cell Proliferation On Day 52	Dopaminergic Neurons	GNL3	1	chr3:52538040-52538041	3.09475e-06	0.06099	Jerber2021NG	Jerber-2021-Nat. Genet	rs7638808
10.1038/s41588-021-00801-6	CL_0000700	Cell-type-specific eQTL	-0.23821	Cell Proliferation On Day 52	Dopaminergic Neurons	GNL3	1	chr3:52535082-52535083	8.63660e-05	0.06068	Jerber2021NG	Jerber-2021-Nat. Genet	rs4687626
10.1038/s41588-021-00801-6	CL_0000700	Cell-type-specific eQTL	-0.32495	Cell Proliferation On Day 52	Dopaminergic Neurons	GNL3	1	chr3:52534789-52534790	7.15195e-09	0.05615	Jerber2021NG	Jerber-2021-Nat. Genet	rs7639267
10.1038/s41588-021-00801-6	CL_0000700	Cell-type-specific eQTL	0.24789	Cell Proliferation On Day 52	Dopaminergic Neurons	GNL3	0	chr3:52533763-52533764	1.66712e-05	0.05758	Jerber2021NG	Jerber-2021-Nat. Genet	rs112562394
10.1038/s41588-021-00801-6	CL_0000700	Cell-type-specific eQTL	-0.30451	Cell Proliferation On Day 52	Dopaminergic Neurons	GNL3	1	chr3:52533601-52533602	1.32994e-08	0.05359	Jerber2021NG	Jerber-2021-Nat. Genet	rs66782572
10.1038/s41588-021-00801-6	CL_0000700	Cell-type-specific eQTL	-0.23821	Cell Proliferation On Day 52	Dopaminergic Neurons	GNL3	1	chr3:52533172-52533173	8.63660e-05	0.06068	Jerber2021NG	Jerber-2021-Nat. Genet	rs28661185
10.1038/s41588-021-00801-6	CL_0000700	Cell-type-specific eQTL	-0.29386	Cell Proliferation On Day 52	Dopaminergic Neurons	GNL3	1	chr3:52532998-52532999	1.35356e-07	0.05575	Jerber2021NG	Jerber-2021-Nat. Genet	rs12489828
10.1038/s41588-021-00801-6	CL_0000700	Cell-type-specific eQTL	-0.29386	Cell Proliferation On Day 52	Dopaminergic Neurons	GNL3	1	chr3:52532898-52532899	1.35356e-07	0.05575	Jerber2021NG	Jerber-2021-Nat. Genet	rs7614981
10.1038/s41588-021-00801-6	CL_0000700	Cell-type-specific eQTL	-0.29801	Cell Proliferation On Day 52	Dopaminergic Neurons	GNL3	1	chr3:52532804-52532805	1.52673e-06	0.06199	Jerber2021NG	Jerber-2021-Nat. Genet	rs12489732
10.1038/s41588-021-00801-6	CL_0000700	Cell-type-specific eQTL	-0.31006	Cell Proliferation On Day 52	Dopaminergic Neurons	GNL3	1	chr3:52532666-52532667	1.01051e-07	0.05823	Jerber2021NG	Jerber-2021-Nat. Genet	rs7636227
10.1038/s41588-021-00801-6	CL_0000700	Cell-type-specific eQTL	-0.32495	Cell Proliferation On Day 52	Dopaminergic Neurons	GNL3	1	chr3:52532049-52532050	7.15195e-09	0.05615	Jerber2021NG	Jerber-2021-Nat. Genet	rs4282054
10.1038/s41588-021-00801-6	CL_0000700	Cell-type-specific eQTL	-0.30406	Cell Proliferation On Day 52	Dopaminergic Neurons	GNL3	1	chr3:52531084-52531085	2.19312e-07	0.05867	Jerber2021NG	Jerber-2021-Nat. Genet	rs6778735
10.1038/s41588-021-00801-6	CL_0000700	Cell-type-specific eQTL	-0.23821	Cell Proliferation On Day 52	Dopaminergic Neurons	GNL3	1	chr3:52529702-52529703	8.63660e-05	0.06068	Jerber2021NG	Jerber-2021-Nat. Genet	rs4687625
10.1038/s41588-021-00801-6	CL_0000700	Cell-type-specific eQTL	-0.23278	Cell Proliferation On Day 52	Dopaminergic Neurons	GNL3	1	chr3:52529556-52529557	1.39505e-04	0.06111	Jerber2021NG	Jerber-2021-Nat. Genet	rs4687624
10.1038/s41588-021-00801-6	CL_0000700	Cell-type-specific eQTL	-0.26987	Cell Proliferation On Day 52	Dopaminergic Neurons	GNL3	1	chr3:52527763-52527764	4.21664e-06	0.05866	Jerber2021NG	Jerber-2021-Nat. Genet	rs11711421
10.1038/s41588-021-00801-6	CL_0000700	Cell-type-specific eQTL	-0.23821	Cell Proliferation On Day 52	Dopaminergic Neurons	GNL3	1	chr3:52526005-52526006	8.63660e-05	0.06068	Jerber2021NG	Jerber-2021-Nat. Genet	rs4475032
10.1038/s41588-021-00801-6	CL_0000700	Cell-type-specific eQTL	-0.32495	Cell Proliferation On Day 52	Dopaminergic Neurons	GNL3	1	chr3:52525689-52525690	7.15195e-09	0.05615	Jerber2021NG	Jerber-2021-Nat. Genet	rs11709284
10.1038/s41588-021-00801-6	CL_0000700	Cell-type-specific eQTL	-0.23821	Cell Proliferation On Day 52	Dopaminergic Neurons	GNL3	1	chr3:52524888-52524889	8.63660e-05	0.06068	Jerber2021NG	Jerber-2021-Nat. Genet	rs34005367
10.1038/s41588-021-00801-6	CL_0000700	Cell-type-specific eQTL	-0.26987	Cell Proliferation On Day 52	Dopaminergic Neurons	GNL3	1	chr3:52524117-52524118	4.21664e-06	0.05866	Jerber2021NG	Jerber-2021-Nat. Genet	rs13621
10.1038/s41588-021-00801-6	CL_0000700	Cell-type-specific eQTL	-0.32495	Cell Proliferation On Day 52	Dopaminergic Neurons	GNL3	1	chr3:52523992-52523993	7.15195e-09	0.05615	Jerber2021NG	Jerber-2021-Nat. Genet	rs13303
10.1038/s41588-021-00801-6	CL_0000700	Cell-type-specific eQTL	-0.23821	Cell Proliferation On Day 52	Dopaminergic Neurons	GNL3	1	chr3:52523022-52523023	8.63660e-05	0.06068	Jerber2021NG	Jerber-2021-Nat. Genet	rs4234633
10.1038/s41588-021-00801-6	CL_0000700	Cell-type-specific eQTL	-0.22543	Cell Proliferation On Day 52	Dopaminergic Neurons	GNL3	1	chr3:52522874-52522875	2.52484e-04	0.0616	Jerber2021NG	Jerber-2021-Nat. Genet	rs4434138
10.1038/s41588-021-00801-6	CL_0000700	Cell-type-specific eQTL	-0.32495	Cell Proliferation On Day 52	Dopaminergic Neurons	GNL3	1	chr3:52521941-52521942	7.15195e-09	0.05615	Jerber2021NG	Jerber-2021-Nat. Genet	rs9853056
10.1038/s41588-021-00801-6	CL_0000700	Cell-type-specific eQTL	-0.32495	Cell Proliferation On Day 52	Dopaminergic Neurons	GNL3	1	chr3:52521300-52521301	7.15195e-09	0.05615	Jerber2021NG	Jerber-2021-Nat. Genet	rs13081028
10.1038/s41588-021-00801-6	CL_0000700	Cell-type-specific eQTL	-0.32495	Cell Proliferation On Day 52	Dopaminergic Neurons	GNL3	1	chr3:52517268-52517269	7.15195e-09	0.05615	Jerber2021NG	Jerber-2021-Nat. Genet	rs67409736
10.1038/s41588-021-00801-6	CL_0000700	Cell-type-specific eQTL	-0.30406	Cell Proliferation On Day 52	Dopaminergic Neurons	GNL3	1	chr3:52517249-52517250	2.19312e-07	0.05867	Jerber2021NG	Jerber-2021-Nat. Genet	rs66824127
10.1038/s41588-021-00801-6	CL_0000700	Cell-type-specific eQTL	-0.23821	Cell Proliferation On Day 52	Dopaminergic Neurons	GNL3	1	chr3:52512804-52512805	8.63660e-05	0.06068	Jerber2021NG	Jerber-2021-Nat. Genet	rs2015971
10.1038/s41588-021-00801-6	CL_0000700	Cell-type-specific eQTL	0.28246	Cell Proliferation On Day 52	Dopaminergic Neurons	GNL3	1	chr3:52508903-52508904	4.60217e-07	0.05602	Jerber2021NG	Jerber-2021-Nat. Genet	rs1010554
10.1038/s41588-021-00801-6	CL_0000700	Cell-type-specific eQTL	0.28304	Cell Proliferation On Day 52	Dopaminergic Neurons	GNL3	1	chr3:52507237-52507238	6.66061e-07	0.05694	Jerber2021NG	Jerber-2021-Nat. Genet	rs11130306
10.1038/s41588-021-00801-6	CL_0000700	Cell-type-specific eQTL	0.28304	Cell Proliferation On Day 52	Dopaminergic Neurons	GNL3	1	chr3:52506757-52506758	6.66061e-07	0.05694	Jerber2021NG	Jerber-2021-Nat. Genet	rs1010553
10.1038/s41588-021-00801-6	CL_0000700	Cell-type-specific eQTL	-0.28785	Cell Proliferation On Day 52	Dopaminergic Neurons	GNL3	1	chr3:52506528-52506529	2.85970e-06	0.0615	Jerber2021NG	Jerber-2021-Nat. Genet	rs1010552
10.1038/s41588-021-00801-6	CL_0000700	Cell-type-specific eQTL	-0.30618	Cell Proliferation On Day 52	Dopaminergic Neurons	GNL3	1	chr3:52502498-52502499	7.71516e-07	0.06195	Jerber2021NG	Jerber-2021-Nat. Genet	rs731831
10.1038/s41588-021-00801-6	CL_0000700	Cell-type-specific eQTL	-0.25283	Cell Proliferation On Day 52	Dopaminergic Neurons	GNL3	0	chr3:52498275-52498276	3.93110e-06	0.05478	Jerber2021NG	Jerber-2021-Nat. Genet	rs34736619
10.1038/s41588-021-00801-6	CL_0000700	Cell-type-specific eQTL	-0.26015	Cell Proliferation On Day 52	Dopaminergic Neurons	GNL3	1	chr3:52473703-52473704	2.59305e-06	0.05534	Jerber2021NG	Jerber-2021-Nat. Genet	rs13094915
10.1038/s41588-021-00801-6	CL_0000700	Cell-type-specific eQTL	0.28599	Cell Proliferation On Day 52	Dopaminergic Neurons	GNL3	1	chr3:52433247-52433248	1.58123e-06	0.05957	Jerber2021NG	Jerber-2021-Nat. Genet	rs648514
10.1038/s41588-021-00801-6	CL_0000700	Cell-type-specific eQTL	-0.25176	Cell Proliferation On Day 52	Dopaminergic Neurons	GNL3	1	chr3:52430811-52430812	9.40092e-05	0.06446	Jerber2021NG	Jerber-2021-Nat. Genet	rs62257614
10.1038/s41588-021-00801-6	CL_0000700	Cell-type-specific eQTL	-0.29809	Cell Proliferation On Day 52	Dopaminergic Neurons	GNL3	1	chr3:52422957-52422958	1.33271e-06	0.06166	Jerber2021NG	Jerber-2021-Nat. Genet	rs2272088
10.1038/s41588-021-00801-6	CL_0000700	Cell-type-specific eQTL	-0.29809	Cell Proliferation On Day 52	Dopaminergic Neurons	GNL3	1	chr3:52416027-52416028	1.33271e-06	0.06166	Jerber2021NG	Jerber-2021-Nat. Genet	rs13094687
10.1038/s41588-021-00801-6	CL_0000700	Cell-type-specific eQTL	-0.29676	Cell Proliferation On Day 52	Dopaminergic Neurons	GNL3	1	chr3:52373025-52373026	1.49711e-06	0.06168	Jerber2021NG	Jerber-2021-Nat. Genet	rs1546737
10.1038/s41588-021-00801-6	CL_0000700	Cell-type-specific eQTL	-0.30798	Cell Proliferation On Day 52	Dopaminergic Neurons	GNL3	1	chr3:52315396-52315397	1.11241e-06	0.06323	Jerber2021NG	Jerber-2021-Nat. Genet	rs3852064
10.1038/s41588-021-00801-6	CL_0000700	Cell-type-specific eQTL	-0.30798	Cell Proliferation On Day 52	Dopaminergic Neurons	GNL3	1	chr3:52315188-52315189	1.11241e-06	0.06323	Jerber2021NG	Jerber-2021-Nat. Genet	rs3852063
10.1038/s41588-021-00801-6	CL_0000700	Cell-type-specific eQTL	0.25031	Cell Proliferation On Day 52	Dopaminergic Neurons	GNL3	1	chr3:52314348-52314349	2.58410e-05	0.05949	Jerber2021NG	Jerber-2021-Nat. Genet	rs730050
10.1038/s41588-021-00801-6	CL_0000700	Cell-type-specific eQTL	-0.30798	Cell Proliferation On Day 52	Dopaminergic Neurons	GNL3	1	chr3:52307199-52307200	1.11241e-06	0.06323	Jerber2021NG	Jerber-2021-Nat. Genet	rs3844291
10.1038/s41588-021-00801-6	CL_0000700	Cell-type-specific eQTL	-0.33955	Cell Proliferation On Day 52	Dopaminergic Neurons	GNL3	1	chr3:52304836-52304837	1.24076e-07	0.06422	Jerber2021NG	Jerber-2021-Nat. Genet	rs9311474
10.1038/s41588-021-00801-6	CL_0000700	Cell-type-specific eQTL	-0.33955	Cell Proliferation On Day 52	Dopaminergic Neurons	GNL3	1	chr3:52299655-52299656	1.24076e-07	0.06422	Jerber2021NG	Jerber-2021-Nat. Genet	rs7622851
10.1038/s41588-021-00801-6	CL_0000700	Cell-type-specific eQTL	-0.33955	Cell Proliferation On Day 52	Dopaminergic Neurons	GNL3	1	chr3:52291743-52291744	1.24076e-07	0.06422	Jerber2021NG	Jerber-2021-Nat. Genet	rs2276834
10.1038/s41588-021-00801-6	CL_0000700	Cell-type-specific eQTL	-0.30798	Cell Proliferation On Day 52	Dopaminergic Neurons	GNL3	1	chr3:52288781-52288782	1.11241e-06	0.06323	Jerber2021NG	Jerber-2021-Nat. Genet	rs34228726
10.1038/s41588-021-00801-6	CL_0000700	Cell-type-specific eQTL	-0.30798	Cell Proliferation On Day 52	Dopaminergic Neurons	GNL3	1	chr3:52288401-52288402	1.11241e-06	0.06323	Jerber2021NG	Jerber-2021-Nat. Genet	rs57615517
10.1038/s41588-021-00801-6	CL_0000700	Cell-type-specific eQTL	-0.33955	Cell Proliferation On Day 52	Dopaminergic Neurons	GNL3	1	chr3:52274829-52274830	1.24076e-07	0.06422	Jerber2021NG	Jerber-2021-Nat. Genet	rs6445358
10.1038/s41588-021-00801-6	CL_0000700	Cell-type-specific eQTL	-0.30798	Cell Proliferation On Day 52	Dopaminergic Neurons	GNL3	1	chr3:52273153-52273154	1.11241e-06	0.06323	Jerber2021NG	Jerber-2021-Nat. Genet	rs59565798
10.1038/s41588-021-00801-6	CL_0000700	Cell-type-specific eQTL	-0.33955	Cell Proliferation On Day 52	Dopaminergic Neurons	GNL3	1	chr3:52271617-52271618	1.24076e-07	0.06422	Jerber2021NG	Jerber-2021-Nat. Genet	rs7629072
10.1038/s41588-021-00801-6	CL_0000700	Cell-type-specific eQTL	-0.33955	Cell Proliferation On Day 52	Dopaminergic Neurons	GNL3	1	chr3:52261879-52261880	1.24076e-07	0.06422	Jerber2021NG	Jerber-2021-Nat. Genet	rs7614727
10.1038/s41588-021-00801-6	CL_0000700	Cell-type-specific eQTL	-0.22939	Cell Proliferation On Day 52	Dopaminergic Neurons	GNL3	1	chr3:52255693-52255694	4.34833e-04	0.0652	Jerber2021NG	Jerber-2021-Nat. Genet	rs11542804
10.1038/s41588-021-00801-6	CL_0000700	Cell-type-specific eQTL	-0.33955	Cell Proliferation On Day 52	Dopaminergic Neurons	GNL3	1	chr3:52254929-52254930	1.24076e-07	0.06422	Jerber2021NG	Jerber-2021-Nat. Genet	rs1060330
10.1038/s41588-021-00801-6	CL_0000700	Cell-type-specific eQTL	-0.3358	Cell Proliferation On Day 52	Dopaminergic Neurons	GNL3	1	chr3:52253452-52253453	1.83003e-07	0.06438	Jerber2021NG	Jerber-2021-Nat. Genet	rs11717383
10.1038/s41588-021-00801-6	CL_0000700	Cell-type-specific eQTL	-0.30798	Cell Proliferation On Day 52	Dopaminergic Neurons	GNL3	1	chr3:52253277-52253278	1.11241e-06	0.06323	Jerber2021NG	Jerber-2021-Nat. Genet	rs34569561
10.1038/s41588-021-00801-6	CL_0000700	Cell-type-specific eQTL	-0.30798	Cell Proliferation On Day 52	Dopaminergic Neurons	GNL3	1	chr3:52245578-52245579	1.11241e-06	0.06323	Jerber2021NG	Jerber-2021-Nat. Genet	rs7618915
10.1038/s41588-021-00801-6	CL_0000700	Cell-type-specific eQTL	-0.30798	Cell Proliferation On Day 52	Dopaminergic Neurons	GNL3	0	chr3:52243429-52243430	1.11241e-06	0.06323	Jerber2021NG	Jerber-2021-Nat. Genet	rs57630131
10.1038/s41588-021-00801-6	CL_0000700	Cell-type-specific eQTL	0.33693	Cell Proliferation On Day 52	Dopaminergic Neurons	GNL3	1	chr3:52239405-52239406	1.72793e-07	0.06447	Jerber2021NG	Jerber-2021-Nat. Genet	rs610060
10.1038/s41588-021-00801-6	CL_0000700	Cell-type-specific eQTL	0.30577	Cell Proliferation On Day 52	Dopaminergic Neurons	GNL3	1	chr3:52234850-52234851	4.73000e-07	0.06071	Jerber2021NG	Jerber-2021-Nat. Genet	rs353547
10.1038/s41588-021-00801-6	CL_0000700	Cell-type-specific eQTL	-0.27771	Cell Proliferation On Day 52	Dopaminergic Neurons	GNL3	1	chr3:52233716-52233717	7.25434e-06	0.0619	Jerber2021NG	Jerber-2021-Nat. Genet	rs2267847
10.1038/s41588-021-00801-6	CL_0000700	Cell-type-specific eQTL	-0.30994	Cell Proliferation On Day 52	Dopaminergic Neurons	GNL3	1	chr3:52227015-52227016	9.70520e-08	0.05813	Jerber2021NG	Jerber-2021-Nat. Genet	rs187084
10.1038/s41588-021-00801-6	CL_0000700	Cell-type-specific eQTL	-0.27529	Cell Proliferation On Day 52	Dopaminergic Neurons	GNL3	1	chr3:52224356-52224357	5.15860e-06	0.06039	Jerber2021NG	Jerber-2021-Nat. Genet	rs352139
10.1038/s41588-021-00801-6	CL_0000700	Cell-type-specific eQTL	-0.23486	Cell Proliferation On Day 52	Dopaminergic Neurons	GNL3	1	chr3:52222681-52222682	1.40414e-04	0.06168	Jerber2021NG	Jerber-2021-Nat. Genet	rs352140
10.1038/s41588-021-00801-6	CL_0000700	Cell-type-specific eQTL	-0.25057	Cell Proliferation On Day 52	Dopaminergic Neurons	GNL3	1	chr3:52218953-52218954	3.03906e-05	0.06008	Jerber2021NG	Jerber-2021-Nat. Genet	rs352162
10.1038/s41588-021-00801-6	CL_0000700	Cell-type-specific eQTL	-0.2413	Cell Proliferation On Day 52	Dopaminergic Neurons	GNL3	1	chr3:52210035-52210036	6.73088e-05	0.06054	Jerber2021NG	Jerber-2021-Nat. Genet	rs11712164
10.1038/s41588-021-00801-6	CL_0000700	Cell-type-specific eQTL	-0.22118	Cell Proliferation On Day 52	Dopaminergic Neurons	GNL3	1	chr3:52208886-52208887	2.64167e-04	0.06063	Jerber2021NG	Jerber-2021-Nat. Genet	rs352165
10.1038/s41588-021-00801-6	CL_0000700	Cell-type-specific eQTL	-0.25275	Cell Proliferation On Day 52	Dopaminergic Neurons	GNL3	1	chr3:52207819-52207820	5.09713e-05	0.06239	Jerber2021NG	Jerber-2021-Nat. Genet	rs6802320
10.1038/s41588-021-00801-6	CL_0000700	Cell-type-specific eQTL	-0.22118	Cell Proliferation On Day 52	Dopaminergic Neurons	GNL3	1	chr3:52204661-52204662	2.64167e-04	0.06063	Jerber2021NG	Jerber-2021-Nat. Genet	rs352166
10.1038/s41588-021-00801-6	CL_0000700	Cell-type-specific eQTL	-0.22118	Cell Proliferation On Day 52	Dopaminergic Neurons	GNL3	1	chr3:52204640-52204641	2.64167e-04	0.06063	Jerber2021NG	Jerber-2021-Nat. Genet	rs352167
10.1038/s41588-021-00801-6	CL_0000700	Cell-type-specific eQTL	-0.22118	Cell Proliferation On Day 52	Dopaminergic Neurons	GNL3	1	chr3:52199845-52199846	2.64167e-04	0.06063	Jerber2021NG	Jerber-2021-Nat. Genet	rs181274
10.1038/s41588-021-00801-6	CL_0000700	Cell-type-specific eQTL	-0.22118	Cell Proliferation On Day 52	Dopaminergic Neurons	GNL3	1	chr3:52196459-52196460	2.64167e-04	0.06063	Jerber2021NG	Jerber-2021-Nat. Genet	rs104903
10.1038/s41588-021-00801-6	CL_0000700	Cell-type-specific eQTL	-0.20812	Cell Proliferation On Day 52	Dopaminergic Neurons	GNL3	1	chr3:52194480-52194481	4.12461e-04	0.05893	Jerber2021NG	Jerber-2021-Nat. Genet	rs524986
10.1038/s41588-021-00801-6	CL_0000700	Cell-type-specific eQTL	-0.20812	Cell Proliferation On Day 52	Dopaminergic Neurons	GNL3	1	chr3:52186187-52186188	4.12461e-04	0.05893	Jerber2021NG	Jerber-2021-Nat. Genet	rs614288
10.1038/s41588-021-00801-6	CL_0000700	Response eQTL	-0.22631	Cell Proliferation On Day 52; Treated With Rotenone	Dopaminergic Neurons	GNL3	1	chr3:52813585-52813586	2.36439e-05	0.05353	Jerber2021NG	Jerber-2021-Nat. Genet	rs2071044
10.1038/s41588-021-00801-6	CL_0000700	Response eQTL	-0.22595	Cell Proliferation On Day 52; Treated With Rotenone	Dopaminergic Neurons	GNL3	1	chr3:52811089-52811090	2.48459e-05	0.05359	Jerber2021NG	Jerber-2021-Nat. Genet	rs2535627
10.1038/s41588-021-00801-6	CL_0000700	Response eQTL	-0.25507	Cell Proliferation On Day 52; Treated With Rotenone	Dopaminergic Neurons	GNL3	1	chr3:52804386-52804387	3.00502e-05	0.06112	Jerber2021NG	Jerber-2021-Nat. Genet	rs4687552
10.1038/s41588-021-00801-6	CL_0000700	Response eQTL	-0.25507	Cell Proliferation On Day 52; Treated With Rotenone	Dopaminergic Neurons	GNL3	1	chr3:52803839-52803840	3.00502e-05	0.06112	Jerber2021NG	Jerber-2021-Nat. Genet	rs2710331
10.1038/s41588-021-00801-6	CL_0000700	Response eQTL	-0.22595	Cell Proliferation On Day 52; Treated With Rotenone	Dopaminergic Neurons	GNL3	1	chr3:52803777-52803778	2.48459e-05	0.05359	Jerber2021NG	Jerber-2021-Nat. Genet	rs4481150
10.1038/s41588-021-00801-6	CL_0000700	Response eQTL	-0.24717	Cell Proliferation On Day 52; Treated With Rotenone	Dopaminergic Neurons	GNL3	1	chr3:52801338-52801339	2.49089e-05	0.05863	Jerber2021NG	Jerber-2021-Nat. Genet	rs736408
10.1038/s41588-021-00801-6	CL_0000700	Response eQTL	-0.20815	Cell Proliferation On Day 52; Treated With Rotenone	Dopaminergic Neurons	GNL3	1	chr3:52799789-52799790	7.27836e-05	0.05247	Jerber2021NG	Jerber-2021-Nat. Genet	rs3617
10.1038/s41588-021-00801-6	CL_0000700	Response eQTL	-0.23049	Cell Proliferation On Day 52; Treated With Rotenone	Dopaminergic Neurons	GNL3	1	chr3:52799203-52799204	7.01222e-05	0.05797	Jerber2021NG	Jerber-2021-Nat. Genet	rs2535629
10.1038/s41588-021-00801-6	CL_0000700	Response eQTL	-0.2907	Cell Proliferation On Day 52; Treated With Rotenone	Dopaminergic Neurons	GNL3	1	chr3:52797685-52797686	1.36684e-06	0.06019	Jerber2021NG	Jerber-2021-Nat. Genet	rs2240919
10.1038/s41588-021-00801-6	CL_0000700	Response eQTL	-0.2727	Cell Proliferation On Day 52; Treated With Rotenone	Dopaminergic Neurons	GNL3	1	chr3:52796993-52796994	8.96160e-06	0.06141	Jerber2021NG	Jerber-2021-Nat. Genet	rs2240920
10.1038/s41588-021-00801-6	CL_0000700	Response eQTL	-0.27398	Cell Proliferation On Day 52; Treated With Rotenone	Dopaminergic Neurons	GNL3	1	chr3:52794612-52794613	4.00550e-06	0.05942	Jerber2021NG	Jerber-2021-Nat. Genet	rs9881468
10.1038/s41588-021-00801-6	CL_0000700	Response eQTL	-0.2727	Cell Proliferation On Day 52; Treated With Rotenone	Dopaminergic Neurons	GNL3	1	chr3:52793899-52793900	8.96160e-06	0.06141	Jerber2021NG	Jerber-2021-Nat. Genet	rs2239699
10.1038/s41588-021-00801-6	CL_0000700	Response eQTL	-0.2727	Cell Proliferation On Day 52; Treated With Rotenone	Dopaminergic Neurons	GNL3	1	chr3:52793550-52793551	8.96160e-06	0.06141	Jerber2021NG	Jerber-2021-Nat. Genet	rs4687654
10.1038/s41588-021-00801-6	CL_0000700	Response eQTL	-0.26698	Cell Proliferation On Day 52; Treated With Rotenone	Dopaminergic Neurons	GNL3	1	chr3:52792830-52792831	7.27182e-06	0.05952	Jerber2021NG	Jerber-2021-Nat. Genet	rs2071508
10.1038/s41588-021-00801-6	CL_0000700	Response eQTL	-0.26698	Cell Proliferation On Day 52; Treated With Rotenone	Dopaminergic Neurons	GNL3	1	chr3:52792691-52792692	7.27182e-06	0.05952	Jerber2021NG	Jerber-2021-Nat. Genet	rs2071507
10.1038/s41588-021-00801-6	CL_0000700	Response eQTL	-0.26906	Cell Proliferation On Day 52; Treated With Rotenone	Dopaminergic Neurons	GNL3	1	chr3:52792604-52792605	4.63996e-06	0.05874	Jerber2021NG	Jerber-2021-Nat. Genet	rs746694
10.1038/s41588-021-00801-6	CL_0000700	Response eQTL	-0.26906	Cell Proliferation On Day 52; Treated With Rotenone	Dopaminergic Neurons	GNL3	1	chr3:52792260-52792261	4.63996e-06	0.05874	Jerber2021NG	Jerber-2021-Nat. Genet	rs2071506
10.1038/s41588-021-00801-6	CL_0000700	Response eQTL	-0.36793	Cell Proliferation On Day 52; Treated With Rotenone	Dopaminergic Neurons	GNL3	1	chr3:52791896-52791897	7.91327e-05	0.09322	Jerber2021NG	Jerber-2021-Nat. Genet	rs7549
10.1038/s41588-021-00801-6	CL_0000700	Response eQTL	-0.26906	Cell Proliferation On Day 52; Treated With Rotenone	Dopaminergic Neurons	GNL3	1	chr3:52791569-52791570	4.63996e-06	0.05874	Jerber2021NG	Jerber-2021-Nat. Genet	rs9324
10.1038/s41588-021-00801-6	CL_0000700	Response eQTL	-0.26906	Cell Proliferation On Day 52; Treated With Rotenone	Dopaminergic Neurons	GNL3	1	chr3:52791512-52791513	4.63996e-06	0.05874	Jerber2021NG	Jerber-2021-Nat. Genet	rs1075653
10.1038/s41588-021-00801-6	CL_0000700	Response eQTL	-0.26698	Cell Proliferation On Day 52; Treated With Rotenone	Dopaminergic Neurons	GNL3	1	chr3:52791446-52791447	7.27182e-06	0.05952	Jerber2021NG	Jerber-2021-Nat. Genet	rs1076425
10.1038/s41588-021-00801-6	CL_0000700	Response eQTL	-0.26698	Cell Proliferation On Day 52; Treated With Rotenone	Dopaminergic Neurons	GNL3	1	chr3:52790594-52790595	7.27182e-06	0.05952	Jerber2021NG	Jerber-2021-Nat. Genet	rs6778329
10.1038/s41588-021-00801-6	CL_0000700	Response eQTL	-0.26698	Cell Proliferation On Day 52; Treated With Rotenone	Dopaminergic Neurons	GNL3	1	chr3:52790079-52790080	7.27182e-06	0.05952	Jerber2021NG	Jerber-2021-Nat. Genet	rs2270197
10.1038/s41588-021-00801-6	CL_0000700	Response eQTL	-0.26698	Cell Proliferation On Day 52; Treated With Rotenone	Dopaminergic Neurons	GNL3	1	chr3:52789432-52789433	7.27182e-06	0.05952	Jerber2021NG	Jerber-2021-Nat. Genet	rs4687551
10.1038/s41588-021-00801-6	CL_0000700	Response eQTL	-0.26698	Cell Proliferation On Day 52; Treated With Rotenone	Dopaminergic Neurons	GNL3	1	chr3:52789414-52789415	7.27182e-06	0.05952	Jerber2021NG	Jerber-2021-Nat. Genet	rs4687550
10.1038/s41588-021-00801-6	CL_0000700	Response eQTL	-0.29088	Cell Proliferation On Day 52; Treated With Rotenone	Dopaminergic Neurons	GNL3	1	chr3:52789110-52789111	3.26173e-07	0.05695	Jerber2021NG	Jerber-2021-Nat. Genet	rs2239549
10.1038/s41588-021-00801-6	CL_0000700	Response eQTL	-0.29088	Cell Proliferation On Day 52; Treated With Rotenone	Dopaminergic Neurons	GNL3	1	chr3:52788905-52788906	3.26173e-07	0.05695	Jerber2021NG	Jerber-2021-Nat. Genet	rs2300149
10.1038/s41588-021-00801-6	CL_0000700	Response eQTL	-0.29088	Cell Proliferation On Day 52; Treated With Rotenone	Dopaminergic Neurons	GNL3	1	chr3:52788840-52788841	3.26173e-07	0.05695	Jerber2021NG	Jerber-2021-Nat. Genet	rs2284350
10.1038/s41588-021-00801-6	CL_0000700	Response eQTL	-0.29088	Cell Proliferation On Day 52; Treated With Rotenone	Dopaminergic Neurons	GNL3	1	chr3:52788773-52788774	3.26173e-07	0.05695	Jerber2021NG	Jerber-2021-Nat. Genet	rs2284351
10.1038/s41588-021-00801-6	CL_0000700	Response eQTL	-0.29088	Cell Proliferation On Day 52; Treated With Rotenone	Dopaminergic Neurons	GNL3	1	chr3:52788493-52788494	3.26173e-07	0.05695	Jerber2021NG	Jerber-2021-Nat. Genet	rs2239550
10.1038/s41588-021-00801-6	CL_0000700	Response eQTL	-0.29802	Cell Proliferation On Day 52; Treated With Rotenone	Dopaminergic Neurons	GNL3	1	chr3:52787161-52787162	2.49661e-07	0.05778	Jerber2021NG	Jerber-2021-Nat. Genet	rs2286798
10.1038/s41588-021-00801-6	CL_0000700	Response eQTL	-0.29155	Cell Proliferation On Day 52; Treated With Rotenone	Dopaminergic Neurons	GNL3	1	chr3:52786995-52786996	2.82281e-07	0.05678	Jerber2021NG	Jerber-2021-Nat. Genet	rs1042779
10.1038/s41588-021-00801-6	CL_0000700	Response eQTL	-0.29621	Cell Proliferation On Day 52; Treated With Rotenone	Dopaminergic Neurons	GNL3	1	chr3:52786965-52786966	4.11828e-07	0.0585	Jerber2021NG	Jerber-2021-Nat. Genet	rs678
10.1038/s41588-021-00801-6	CL_0000700	Response eQTL	-0.28439	Cell Proliferation On Day 52; Treated With Rotenone	Dopaminergic Neurons	GNL3	1	chr3:52785311-52785312	3.03432e-07	0.05553	Jerber2021NG	Jerber-2021-Nat. Genet	rs2268023
10.1038/s41588-021-00801-6	CL_0000700	Response eQTL	-0.2947	Cell Proliferation On Day 52; Treated With Rotenone	Dopaminergic Neurons	GNL3	1	chr3:52784563-52784564	2.32902e-07	0.05699	Jerber2021NG	Jerber-2021-Nat. Genet	rs2239551
10.1038/s41588-021-00801-6	CL_0000700	Response eQTL	-0.30095	Cell Proliferation On Day 52; Treated With Rotenone	Dopaminergic Neurons	GNL3	1	chr3:52783762-52783763	2.82149e-07	0.05861	Jerber2021NG	Jerber-2021-Nat. Genet	rs3774355
10.1038/s41588-021-00801-6	CL_0000700	Response eQTL	-0.30095	Cell Proliferation On Day 52; Treated With Rotenone	Dopaminergic Neurons	GNL3	1	chr3:52783659-52783660	2.82149e-07	0.05861	Jerber2021NG	Jerber-2021-Nat. Genet	rs3774354
10.1038/s41588-021-00801-6	CL_0000700	Response eQTL	-0.23614	Cell Proliferation On Day 52; Treated With Rotenone	Dopaminergic Neurons	GNL3	1	chr3:52781889-52781890	4.98006e-06	0.05172	Jerber2021NG	Jerber-2021-Nat. Genet	rs2710323
10.1038/s41588-021-00801-6	CL_0000700	Response eQTL	-0.23006	Cell Proliferation On Day 52; Treated With Rotenone	Dopaminergic Neurons	GNL3	0	chr3:52780240-52780241	1.35740e-05	0.05288	Jerber2021NG	Jerber-2021-Nat. Genet	rs2302417
10.1038/s41588-021-00801-6	CL_0000700	Response eQTL	-0.34947	Cell Proliferation On Day 52; Treated With Rotenone	Dopaminergic Neurons	GNL3	0	chr3:52780239-52780240	2.27092e-04	0.09479	Jerber2021NG	Jerber-2021-Nat. Genet	rs76203017
10.1038/s41588-021-00801-6	CL_0000700	Response eQTL	-0.29001	Cell Proliferation On Day 52; Treated With Rotenone	Dopaminergic Neurons	GNL3	1	chr3:52777156-52777157	3.46970e-07	0.05691	Jerber2021NG	Jerber-2021-Nat. Genet	rs6792369
10.1038/s41588-021-00801-6	CL_0000700	Response eQTL	-0.26915	Cell Proliferation On Day 52; Treated With Rotenone	Dopaminergic Neurons	GNL3	1	chr3:52776917-52776918	9.41226e-07	0.05489	Jerber2021NG	Jerber-2021-Nat. Genet	rs2098167
10.1038/s41588-021-00801-6	CL_0000700	Response eQTL	-0.29658	Cell Proliferation On Day 52; Treated With Rotenone	Dopaminergic Neurons	GNL3	1	chr3:52775509-52775510	8.47222e-08	0.05536	Jerber2021NG	Jerber-2021-Nat. Genet	rs2019065
10.1038/s41588-021-00801-6	CL_0000700	Response eQTL	-0.28909	Cell Proliferation On Day 52; Treated With Rotenone	Dopaminergic Neurons	GNL3	1	chr3:52775177-52775178	6.16955e-07	0.05798	Jerber2021NG	Jerber-2021-Nat. Genet	rs3755799
10.1038/s41588-021-00801-6	CL_0000700	Response eQTL	-0.2704	Cell Proliferation On Day 52; Treated With Rotenone	Dopaminergic Neurons	GNL3	1	chr3:52774325-52774326	1.84442e-06	0.05669	Jerber2021NG	Jerber-2021-Nat. Genet	rs1014969
10.1038/s41588-021-00801-6	CL_0000700	Response eQTL	-0.28869	Cell Proliferation On Day 52; Treated With Rotenone	Dopaminergic Neurons	GNL3	1	chr3:52773720-52773721	2.87960e-07	0.05626	Jerber2021NG	Jerber-2021-Nat. Genet	rs11717836
10.1038/s41588-021-00801-6	CL_0000700	Response eQTL	-0.2704	Cell Proliferation On Day 52; Treated With Rotenone	Dopaminergic Neurons	GNL3	1	chr3:52771077-52771078	1.84442e-06	0.05669	Jerber2021NG	Jerber-2021-Nat. Genet	rs998909
10.1038/s41588-021-00801-6	CL_0000700	Response eQTL	-0.28869	Cell Proliferation On Day 52; Treated With Rotenone	Dopaminergic Neurons	GNL3	1	chr3:52769189-52769190	2.87960e-07	0.05626	Jerber2021NG	Jerber-2021-Nat. Genet	rs2268024
10.1038/s41588-021-00801-6	CL_0000700	Response eQTL	-0.28411	Cell Proliferation On Day 52; Treated With Rotenone	Dopaminergic Neurons	GNL3	1	chr3:52768386-52768387	2.99159e-07	0.05545	Jerber2021NG	Jerber-2021-Nat. Genet	rs2230534
10.1038/s41588-021-00801-6	CL_0000700	Response eQTL	-0.28869	Cell Proliferation On Day 52; Treated With Rotenone	Dopaminergic Neurons	GNL3	1	chr3:52766715-52766716	2.87960e-07	0.05626	Jerber2021NG	Jerber-2021-Nat. Genet	rs4687650
10.1038/s41588-021-00801-6	CL_0000700	Response eQTL	-0.28411	Cell Proliferation On Day 52; Treated With Rotenone	Dopaminergic Neurons	GNL3	1	chr3:52766268-52766269	2.99159e-07	0.05545	Jerber2021NG	Jerber-2021-Nat. Genet	rs2230535
10.1038/s41588-021-00801-6	CL_0000700	Response eQTL	-0.28869	Cell Proliferation On Day 52; Treated With Rotenone	Dopaminergic Neurons	GNL3	1	chr3:52763618-52763619	2.87960e-07	0.05626	Jerber2021NG	Jerber-2021-Nat. Genet	rs1029871
10.1038/s41588-021-00801-6	CL_0000700	Response eQTL	-0.28869	Cell Proliferation On Day 52; Treated With Rotenone	Dopaminergic Neurons	GNL3	1	chr3:52761208-52761209	2.87960e-07	0.05626	Jerber2021NG	Jerber-2021-Nat. Genet	rs2268025
10.1038/s41588-021-00801-6	CL_0000700	Response eQTL	-0.26484	Cell Proliferation On Day 52; Treated With Rotenone	Dopaminergic Neurons	GNL3	1	chr3:52760351-52760352	2.61752e-06	0.05636	Jerber2021NG	Jerber-2021-Nat. Genet	rs4687648
10.1038/s41588-021-00801-6	CL_0000700	Response eQTL	-0.2704	Cell Proliferation On Day 52; Treated With Rotenone	Dopaminergic Neurons	GNL3	1	chr3:52759586-52759587	1.84442e-06	0.05669	Jerber2021NG	Jerber-2021-Nat. Genet	rs12497998
10.1038/s41588-021-00801-6	CL_0000700	Response eQTL	-0.28869	Cell Proliferation On Day 52; Treated With Rotenone	Dopaminergic Neurons	GNL3	1	chr3:52759223-52759224	2.87960e-07	0.05626	Jerber2021NG	Jerber-2021-Nat. Genet	rs11130327
10.1038/s41588-021-00801-6	CL_0000700	Response eQTL	-0.28411	Cell Proliferation On Day 52; Treated With Rotenone	Dopaminergic Neurons	GNL3	1	chr3:52756197-52756198	2.99159e-07	0.05545	Jerber2021NG	Jerber-2021-Nat. Genet	rs13061423
10.1038/s41588-021-00801-6	CL_0000700	Response eQTL	-0.27011	Cell Proliferation On Day 52; Treated With Rotenone	Dopaminergic Neurons	GNL3	1	chr3:52754943-52754944	1.16097e-06	0.05555	Jerber2021NG	Jerber-2021-Nat. Genet	rs6414570
10.1038/s41588-021-00801-6	CL_0000700	Response eQTL	-0.28411	Cell Proliferation On Day 52; Treated With Rotenone	Dopaminergic Neurons	GNL3	1	chr3:52753587-52753588	2.99159e-07	0.05545	Jerber2021NG	Jerber-2021-Nat. Genet	rs2336545
10.1038/s41588-021-00801-6	CL_0000700	Response eQTL	-0.28869	Cell Proliferation On Day 52; Treated With Rotenone	Dopaminergic Neurons	GNL3	1	chr3:52753226-52753227	2.87960e-07	0.05626	Jerber2021NG	Jerber-2021-Nat. Genet	rs13095332
10.1038/s41588-021-00801-6	CL_0000700	Response eQTL	-0.28329	Cell Proliferation On Day 52; Treated With Rotenone	Dopaminergic Neurons	GNL3	0	chr3:52752897-52752898	5.93404e-07	0.05673	Jerber2021NG	Jerber-2021-Nat. Genet	rs13094778
10.1038/s41588-021-00801-6	CL_0000700	Response eQTL	-0.23098	Cell Proliferation On Day 52; Treated With Rotenone	Dopaminergic Neurons	GNL3	1	chr3:52751222-52751223	1.79563e-05	0.05385	Jerber2021NG	Jerber-2021-Nat. Genet	rs7646741
10.1038/s41588-021-00801-6	CL_0000700	Response eQTL	-0.28411	Cell Proliferation On Day 52; Treated With Rotenone	Dopaminergic Neurons	GNL3	1	chr3:52751152-52751153	2.99159e-07	0.05545	Jerber2021NG	Jerber-2021-Nat. Genet	rs13082960
10.1038/s41588-021-00801-6	CL_0000700	Response eQTL	-0.2704	Cell Proliferation On Day 52; Treated With Rotenone	Dopaminergic Neurons	GNL3	1	chr3:52750400-52750401	1.84442e-06	0.05669	Jerber2021NG	Jerber-2021-Nat. Genet	rs6787154
10.1038/s41588-021-00801-6	CL_0000700	Response eQTL	-0.28411	Cell Proliferation On Day 52; Treated With Rotenone	Dopaminergic Neurons	GNL3	1	chr3:52748823-52748824	2.99159e-07	0.05545	Jerber2021NG	Jerber-2021-Nat. Genet	rs62255396
10.1038/s41588-021-00801-6	CL_0000700	Response eQTL	-0.28869	Cell Proliferation On Day 52; Treated With Rotenone	Dopaminergic Neurons	GNL3	1	chr3:52748258-52748259	2.87960e-07	0.05626	Jerber2021NG	Jerber-2021-Nat. Genet	rs13087772
10.1038/s41588-021-00801-6	CL_0000700	Response eQTL	-0.28869	Cell Proliferation On Day 52; Treated With Rotenone	Dopaminergic Neurons	GNL3	1	chr3:52747523-52747524	2.87960e-07	0.05626	Jerber2021NG	Jerber-2021-Nat. Genet	rs13082208
10.1038/s41588-021-00801-6	CL_0000700	Response eQTL	-0.2704	Cell Proliferation On Day 52; Treated With Rotenone	Dopaminergic Neurons	GNL3	1	chr3:52746493-52746494	1.84442e-06	0.05669	Jerber2021NG	Jerber-2021-Nat. Genet	rs2072390
10.1038/s41588-021-00801-6	CL_0000700	Response eQTL	-0.2704	Cell Proliferation On Day 52; Treated With Rotenone	Dopaminergic Neurons	GNL3	1	chr3:52745785-52745786	1.84442e-06	0.05669	Jerber2021NG	Jerber-2021-Nat. Genet	rs13074853
10.1038/s41588-021-00801-6	CL_0000700	Response eQTL	-0.2704	Cell Proliferation On Day 52; Treated With Rotenone	Dopaminergic Neurons	GNL3	1	chr3:52745575-52745576	1.84442e-06	0.05669	Jerber2021NG	Jerber-2021-Nat. Genet	rs112860674
10.1038/s41588-021-00801-6	CL_0000700	Response eQTL	-0.28411	Cell Proliferation On Day 52; Treated With Rotenone	Dopaminergic Neurons	GNL3	1	chr3:52744331-52744332	2.99159e-07	0.05545	Jerber2021NG	Jerber-2021-Nat. Genet	rs2268026
10.1038/s41588-021-00801-6	CL_0000700	Response eQTL	-0.28869	Cell Proliferation On Day 52; Treated With Rotenone	Dopaminergic Neurons	GNL3	1	chr3:52744035-52744036	2.87960e-07	0.05626	Jerber2021NG	Jerber-2021-Nat. Genet	rs2286800
10.1038/s41588-021-00801-6	CL_0000700	Response eQTL	-0.2704	Cell Proliferation On Day 52; Treated With Rotenone	Dopaminergic Neurons	GNL3	1	chr3:52742892-52742893	1.84442e-06	0.05669	Jerber2021NG	Jerber-2021-Nat. Genet	rs7638162
10.1038/s41588-021-00801-6	CL_0000700	Response eQTL	-0.2704	Cell Proliferation On Day 52; Treated With Rotenone	Dopaminergic Neurons	GNL3	1	chr3:52740514-52740515	1.84442e-06	0.05669	Jerber2021NG	Jerber-2021-Nat. Genet	rs2159644
10.1038/s41588-021-00801-6	CL_0000700	Response eQTL	-0.26783	Cell Proliferation On Day 52; Treated With Rotenone	Dopaminergic Neurons	GNL3	1	chr3:52737904-52737905	3.57026e-06	0.05778	Jerber2021NG	Jerber-2021-Nat. Genet	rs11130326
10.1038/s41588-021-00801-6	CL_0000700	Response eQTL	-0.2704	Cell Proliferation On Day 52; Treated With Rotenone	Dopaminergic Neurons	GNL3	1	chr3:52737452-52737453	1.84442e-06	0.05669	Jerber2021NG	Jerber-2021-Nat. Genet	rs6445535
10.1038/s41588-021-00801-6	CL_0000700	Response eQTL	-0.28411	Cell Proliferation On Day 52; Treated With Rotenone	Dopaminergic Neurons	GNL3	1	chr3:52736968-52736969	2.99159e-07	0.05545	Jerber2021NG	Jerber-2021-Nat. Genet	rs11130325
10.1038/s41588-021-00801-6	CL_0000700	Response eQTL	-0.23098	Cell Proliferation On Day 52; Treated With Rotenone	Dopaminergic Neurons	GNL3	1	chr3:52736294-52736295	1.79563e-05	0.05385	Jerber2021NG	Jerber-2021-Nat. Genet	rs11130324
10.1038/s41588-021-00801-6	CL_0000700	Response eQTL	-0.28411	Cell Proliferation On Day 52; Treated With Rotenone	Dopaminergic Neurons	GNL3	1	chr3:52736261-52736262	2.99159e-07	0.05545	Jerber2021NG	Jerber-2021-Nat. Genet	rs11130323
10.1038/s41588-021-00801-6	CL_0000700	Response eQTL	-0.2704	Cell Proliferation On Day 52; Treated With Rotenone	Dopaminergic Neurons	GNL3	1	chr3:52733411-52733412	1.84442e-06	0.05669	Jerber2021NG	Jerber-2021-Nat. Genet	rs767418
10.1038/s41588-021-00801-6	CL_0000700	Response eQTL	-0.28869	Cell Proliferation On Day 52; Treated With Rotenone	Dopaminergic Neurons	GNL3	1	chr3:52732590-52732591	2.87960e-07	0.05626	Jerber2021NG	Jerber-2021-Nat. Genet	rs2268027
10.1038/s41588-021-00801-6	CL_0000700	Response eQTL	-0.2704	Cell Proliferation On Day 52; Treated With Rotenone	Dopaminergic Neurons	GNL3	1	chr3:52732106-52732107	1.84442e-06	0.05669	Jerber2021NG	Jerber-2021-Nat. Genet	rs34739010
10.1038/s41588-021-00801-6	CL_0000700	Response eQTL	-0.2704	Cell Proliferation On Day 52; Treated With Rotenone	Dopaminergic Neurons	GNL3	1	chr3:52731866-52731867	1.84442e-06	0.05669	Jerber2021NG	Jerber-2021-Nat. Genet	rs11714030
10.1038/s41588-021-00801-6	CL_0000700	Response eQTL	-0.2704	Cell Proliferation On Day 52; Treated With Rotenone	Dopaminergic Neurons	GNL3	1	chr3:52731630-52731631	1.84442e-06	0.05669	Jerber2021NG	Jerber-2021-Nat. Genet	rs2079929
10.1038/s41588-021-00801-6	CL_0000700	Response eQTL	-0.28869	Cell Proliferation On Day 52; Treated With Rotenone	Dopaminergic Neurons	GNL3	1	chr3:52730608-52730609	2.87960e-07	0.05626	Jerber2021NG	Jerber-2021-Nat. Genet	rs10780035
10.1038/s41588-021-00801-6	CL_0000700	Response eQTL	-0.28869	Cell Proliferation On Day 52; Treated With Rotenone	Dopaminergic Neurons	GNL3	1	chr3:52729938-52729939	2.87960e-07	0.05626	Jerber2021NG	Jerber-2021-Nat. Genet	rs4687549
10.1038/s41588-021-00801-6	CL_0000700	Response eQTL	-0.28411	Cell Proliferation On Day 52; Treated With Rotenone	Dopaminergic Neurons	GNL3	1	chr3:52729147-52729148	2.99159e-07	0.05545	Jerber2021NG	Jerber-2021-Nat. Genet	rs34291015
10.1038/s41588-021-00801-6	CL_0000700	Response eQTL	-0.2704	Cell Proliferation On Day 52; Treated With Rotenone	Dopaminergic Neurons	GNL3	1	chr3:52728984-52728985	1.84442e-06	0.05669	Jerber2021NG	Jerber-2021-Nat. Genet	rs7653028
10.1038/s41588-021-00801-6	CL_0000700	Response eQTL	-0.28869	Cell Proliferation On Day 52; Treated With Rotenone	Dopaminergic Neurons	GNL3	1	chr3:52728976-52728977	2.87960e-07	0.05626	Jerber2021NG	Jerber-2021-Nat. Genet	rs13086623
10.1038/s41588-021-00801-6	CL_0000700	Response eQTL	-0.27082	Cell Proliferation On Day 52; Treated With Rotenone	Dopaminergic Neurons	GNL3	1	chr3:52728682-52728683	2.17526e-06	0.05718	Jerber2021NG	Jerber-2021-Nat. Genet	rs11130321
10.1038/s41588-021-00801-6	CL_0000700	Response eQTL	-0.28411	Cell Proliferation On Day 52; Treated With Rotenone	Dopaminergic Neurons	GNL3	1	chr3:52725153-52725154	2.99159e-07	0.05545	Jerber2021NG	Jerber-2021-Nat. Genet	rs34610878
10.1038/s41588-021-00801-6	CL_0000700	Response eQTL	-0.28411	Cell Proliferation On Day 52; Treated With Rotenone	Dopaminergic Neurons	GNL3	1	chr3:52724926-52724927	2.99159e-07	0.05545	Jerber2021NG	Jerber-2021-Nat. Genet	rs11714088
10.1038/s41588-021-00801-6	CL_0000700	Response eQTL	-0.28411	Cell Proliferation On Day 52; Treated With Rotenone	Dopaminergic Neurons	GNL3	0	chr3:52721576-52721577	2.99159e-07	0.05545	Jerber2021NG	Jerber-2021-Nat. Genet	rs11130319
10.1038/s41588-021-00801-6	CL_0000700	Response eQTL	-0.26255	Cell Proliferation On Day 52; Treated With Rotenone	Dopaminergic Neurons	GNL3	1	chr3:52719516-52719517	2.80705e-06	0.05605	Jerber2021NG	Jerber-2021-Nat. Genet	rs34918356
10.1038/s41588-021-00801-6	CL_0000700	Response eQTL	-0.23098	Cell Proliferation On Day 52; Treated With Rotenone	Dopaminergic Neurons	GNL3	1	chr3:52718943-52718944	1.79563e-05	0.05385	Jerber2021NG	Jerber-2021-Nat. Genet	rs35212380
10.1038/s41588-021-00801-6	CL_0000700	Response eQTL	-0.2704	Cell Proliferation On Day 52; Treated With Rotenone	Dopaminergic Neurons	GNL3	1	chr3:52718059-52718060	1.84442e-06	0.05669	Jerber2021NG	Jerber-2021-Nat. Genet	rs2109634
10.1038/s41588-021-00801-6	CL_0000700	Response eQTL	-0.2704	Cell Proliferation On Day 52; Treated With Rotenone	Dopaminergic Neurons	GNL3	1	chr3:52717518-52717519	1.84442e-06	0.05669	Jerber2021NG	Jerber-2021-Nat. Genet	rs7624716
10.1038/s41588-021-00801-6	CL_0000700	Response eQTL	-0.2704	Cell Proliferation On Day 52; Treated With Rotenone	Dopaminergic Neurons	GNL3	1	chr3:52715318-52715319	1.84442e-06	0.05669	Jerber2021NG	Jerber-2021-Nat. Genet	rs35526119
10.1038/s41588-021-00801-6	CL_0000700	Response eQTL	-0.2704	Cell Proliferation On Day 52; Treated With Rotenone	Dopaminergic Neurons	GNL3	1	chr3:52714841-52714842	1.84442e-06	0.05669	Jerber2021NG	Jerber-2021-Nat. Genet	rs11716747
10.1038/s41588-021-00801-6	CL_0000700	Response eQTL	-0.28869	Cell Proliferation On Day 52; Treated With Rotenone	Dopaminergic Neurons	GNL3	1	chr3:52714255-52714256	2.87960e-07	0.05626	Jerber2021NG	Jerber-2021-Nat. Genet	rs2878726
10.1038/s41588-021-00801-6	CL_0000700	Response eQTL	-0.2704	Cell Proliferation On Day 52; Treated With Rotenone	Dopaminergic Neurons	GNL3	1	chr3:52714042-52714043	1.84442e-06	0.05669	Jerber2021NG	Jerber-2021-Nat. Genet	rs1468638
10.1038/s41588-021-00801-6	CL_0000700	Response eQTL	-0.28364	Cell Proliferation On Day 52; Treated With Rotenone	Dopaminergic Neurons	GNL3	1	chr3:52713726-52713727	5.98195e-07	0.05682	Jerber2021NG	Jerber-2021-Nat. Genet	rs7620039
10.1038/s41588-021-00801-6	CL_0000700	Response eQTL	-0.28411	Cell Proliferation On Day 52; Treated With Rotenone	Dopaminergic Neurons	GNL3	1	chr3:52713305-52713306	2.99159e-07	0.05545	Jerber2021NG	Jerber-2021-Nat. Genet	rs62255371
10.1038/s41588-021-00801-6	CL_0000700	Response eQTL	-0.2704	Cell Proliferation On Day 52; Treated With Rotenone	Dopaminergic Neurons	GNL3	1	chr3:52712525-52712526	1.84442e-06	0.05669	Jerber2021NG	Jerber-2021-Nat. Genet	rs4687644
10.1038/s41588-021-00801-6	CL_0000700	Response eQTL	0.21505	Cell Proliferation On Day 52; Treated With Rotenone	Dopaminergic Neurons	GNL3	1	chr3:52711071-52711072	5.74429e-05	0.05345	Jerber2021NG	Jerber-2021-Nat. Genet	rs11235
10.1038/s41588-021-00801-6	CL_0000700	Response eQTL	-0.2704	Cell Proliferation On Day 52; Treated With Rotenone	Dopaminergic Neurons	GNL3	1	chr3:52710444-52710445	1.84442e-06	0.05669	Jerber2021NG	Jerber-2021-Nat. Genet	rs13079063
10.1038/s41588-021-00801-6	CL_0000700	Response eQTL	-0.2704	Cell Proliferation On Day 52; Treated With Rotenone	Dopaminergic Neurons	GNL3	1	chr3:52709368-52709369	1.84442e-06	0.05669	Jerber2021NG	Jerber-2021-Nat. Genet	rs6445534
10.1038/s41588-021-00801-6	CL_0000700	Response eQTL	-0.26763	Cell Proliferation On Day 52; Treated With Rotenone	Dopaminergic Neurons	GNL3	1	chr3:52708521-52708522	3.62214e-06	0.05778	Jerber2021NG	Jerber-2021-Nat. Genet	rs12486554
10.1038/s41588-021-00801-6	CL_0000700	Response eQTL	-0.28411	Cell Proliferation On Day 52; Treated With Rotenone	Dopaminergic Neurons	GNL3	1	chr3:52708397-52708398	2.99159e-07	0.05545	Jerber2021NG	Jerber-2021-Nat. Genet	rs34017441
10.1038/s41588-021-00801-6	CL_0000700	Response eQTL	-0.2704	Cell Proliferation On Day 52; Treated With Rotenone	Dopaminergic Neurons	GNL3	1	chr3:52707144-52707145	1.84442e-06	0.05669	Jerber2021NG	Jerber-2021-Nat. Genet	rs3755798
10.1038/s41588-021-00801-6	CL_0000700	Response eQTL	-0.2704	Cell Proliferation On Day 52; Treated With Rotenone	Dopaminergic Neurons	GNL3	1	chr3:52706166-52706167	1.84442e-06	0.05669	Jerber2021NG	Jerber-2021-Nat. Genet	rs6617
10.1038/s41588-021-00801-6	CL_0000700	Response eQTL	-0.28869	Cell Proliferation On Day 52; Treated With Rotenone	Dopaminergic Neurons	GNL3	1	chr3:52705504-52705505	2.87960e-07	0.05626	Jerber2021NG	Jerber-2021-Nat. Genet	rs8906
10.1038/s41588-021-00801-6	CL_0000700	Response eQTL	-0.2704	Cell Proliferation On Day 52; Treated With Rotenone	Dopaminergic Neurons	GNL3	1	chr3:52704149-52704150	1.84442e-06	0.05669	Jerber2021NG	Jerber-2021-Nat. Genet	rs12635140
10.1038/s41588-021-00801-6	CL_0000700	Response eQTL	-0.28869	Cell Proliferation On Day 52; Treated With Rotenone	Dopaminergic Neurons	GNL3	1	chr3:52700938-52700939	2.87960e-07	0.05626	Jerber2021NG	Jerber-2021-Nat. Genet	rs11130318
10.1038/s41588-021-00801-6	CL_0000700	Response eQTL	-0.23098	Cell Proliferation On Day 52; Treated With Rotenone	Dopaminergic Neurons	GNL3	1	chr3:52698413-52698414	1.79563e-05	0.05385	Jerber2021NG	Jerber-2021-Nat. Genet	rs13081155
10.1038/s41588-021-00801-6	CL_0000700	Response eQTL	-0.2704	Cell Proliferation On Day 52; Treated With Rotenone	Dopaminergic Neurons	GNL3	1	chr3:52697582-52697583	1.84442e-06	0.05669	Jerber2021NG	Jerber-2021-Nat. Genet	rs3733041
10.1038/s41588-021-00801-6	CL_0000700	Response eQTL	-0.28411	Cell Proliferation On Day 52; Treated With Rotenone	Dopaminergic Neurons	GNL3	1	chr3:52697467-52697468	2.99159e-07	0.05545	Jerber2021NG	Jerber-2021-Nat. Genet	rs11130317
10.1038/s41588-021-00801-6	CL_0000700	Response eQTL	-0.2704	Cell Proliferation On Day 52; Treated With Rotenone	Dopaminergic Neurons	GNL3	1	chr3:52697253-52697254	1.84442e-06	0.05669	Jerber2021NG	Jerber-2021-Nat. Genet	rs2164885
10.1038/s41588-021-00801-6	CL_0000700	Response eQTL	-0.28869	Cell Proliferation On Day 52; Treated With Rotenone	Dopaminergic Neurons	GNL3	1	chr3:52694788-52694789	2.87960e-07	0.05626	Jerber2021NG	Jerber-2021-Nat. Genet	rs6976
10.1038/s41588-021-00801-6	CL_0000700	Response eQTL	-0.2704	Cell Proliferation On Day 52; Treated With Rotenone	Dopaminergic Neurons	GNL3	1	chr3:52693241-52693242	1.84442e-06	0.05669	Jerber2021NG	Jerber-2021-Nat. Genet	rs2289247
10.1038/s41588-021-00801-6	CL_0000700	Response eQTL	-0.28869	Cell Proliferation On Day 52; Treated With Rotenone	Dopaminergic Neurons	GNL3	1	chr3:52692679-52692680	2.87960e-07	0.05626	Jerber2021NG	Jerber-2021-Nat. Genet	rs6762813
10.1038/s41588-021-00801-6	CL_0000700	Response eQTL	-0.28869	Cell Proliferation On Day 52; Treated With Rotenone	Dopaminergic Neurons	GNL3	1	chr3:52691945-52691946	2.87960e-07	0.05626	Jerber2021NG	Jerber-2021-Nat. Genet	rs13076193
10.1038/s41588-021-00801-6	CL_0000700	Response eQTL	-0.2704	Cell Proliferation On Day 52; Treated With Rotenone	Dopaminergic Neurons	GNL3	1	chr3:52691755-52691756	1.84442e-06	0.05669	Jerber2021NG	Jerber-2021-Nat. Genet	rs35315313
10.1038/s41588-021-00801-6	CL_0000700	Response eQTL	-0.23098	Cell Proliferation On Day 52; Treated With Rotenone	Dopaminergic Neurons	GNL3	1	chr3:52688319-52688320	1.79563e-05	0.05385	Jerber2021NG	Jerber-2021-Nat. Genet	rs3774349
10.1038/s41588-021-00801-6	CL_0000700	Response eQTL	-0.28869	Cell Proliferation On Day 52; Treated With Rotenone	Dopaminergic Neurons	GNL3	1	chr3:52687289-52687290	2.87960e-07	0.05626	Jerber2021NG	Jerber-2021-Nat. Genet	rs11177
10.1038/s41588-021-00801-6	CL_0000700	Response eQTL	-0.23098	Cell Proliferation On Day 52; Treated With Rotenone	Dopaminergic Neurons	GNL3	1	chr3:52686064-52686065	1.79563e-05	0.05385	Jerber2021NG	Jerber-2021-Nat. Genet	rs1108842
10.1038/s41588-021-00801-6	CL_0000700	Response eQTL	0.21239	Cell Proliferation On Day 52; Treated With Rotenone	Dopaminergic Neurons	GNL3	1	chr3:52685800-52685801	8.76218e-05	0.05415	Jerber2021NG	Jerber-2021-Nat. Genet	rs10933
10.1038/s41588-021-00801-6	CL_0000700	Response eQTL	-0.2704	Cell Proliferation On Day 52; Treated With Rotenone	Dopaminergic Neurons	GNL3	1	chr3:52685382-52685383	1.84442e-06	0.05669	Jerber2021NG	Jerber-2021-Nat. Genet	rs1866268
10.1038/s41588-021-00801-6	CL_0000700	Response eQTL	-0.2704	Cell Proliferation On Day 52; Treated With Rotenone	Dopaminergic Neurons	GNL3	1	chr3:52685072-52685073	1.84442e-06	0.05669	Jerber2021NG	Jerber-2021-Nat. Genet	rs3733039
10.1038/s41588-021-00801-6	CL_0000700	Response eQTL	-0.2704	Cell Proliferation On Day 52; Treated With Rotenone	Dopaminergic Neurons	GNL3	1	chr3:52684264-52684265	1.84442e-06	0.05669	Jerber2021NG	Jerber-2021-Nat. Genet	rs10865974
10.1038/s41588-021-00801-6	CL_0000700	Response eQTL	-0.28869	Cell Proliferation On Day 52; Treated With Rotenone	Dopaminergic Neurons	GNL3	1	chr3:52684138-52684139	2.87960e-07	0.05626	Jerber2021NG	Jerber-2021-Nat. Genet	rs10865973
10.1038/s41588-021-00801-6	CL_0000700	Response eQTL	-0.2704	Cell Proliferation On Day 52; Treated With Rotenone	Dopaminergic Neurons	GNL3	1	chr3:52683266-52683267	1.84442e-06	0.05669	Jerber2021NG	Jerber-2021-Nat. Genet	rs6445531
10.1038/s41588-021-00801-6	CL_0000700	Response eQTL	-0.2704	Cell Proliferation On Day 52; Treated With Rotenone	Dopaminergic Neurons	GNL3	1	chr3:52682921-52682922	1.84442e-06	0.05669	Jerber2021NG	Jerber-2021-Nat. Genet	rs34157897
10.1038/s41588-021-00801-6	CL_0000700	Response eQTL	-0.28411	Cell Proliferation On Day 52; Treated With Rotenone	Dopaminergic Neurons	GNL3	1	chr3:52677958-52677959	2.99159e-07	0.05545	Jerber2021NG	Jerber-2021-Nat. Genet	rs67539070
10.1038/s41588-021-00801-6	CL_0000700	Response eQTL	-0.28411	Cell Proliferation On Day 52; Treated With Rotenone	Dopaminergic Neurons	GNL3	1	chr3:52677515-52677516	2.99159e-07	0.05545	Jerber2021NG	Jerber-2021-Nat. Genet	rs9714129
10.1038/s41588-021-00801-6	CL_0000700	Response eQTL	-0.28869	Cell Proliferation On Day 52; Treated With Rotenone	Dopaminergic Neurons	GNL3	1	chr3:52677456-52677457	2.87960e-07	0.05626	Jerber2021NG	Jerber-2021-Nat. Genet	rs13061253
10.1038/s41588-021-00801-6	CL_0000700	Response eQTL	-0.28411	Cell Proliferation On Day 52; Treated With Rotenone	Dopaminergic Neurons	GNL3	1	chr3:52676620-52676621	2.99159e-07	0.05545	Jerber2021NG	Jerber-2021-Nat. Genet	rs2336542
10.1038/s41588-021-00801-6	CL_0000700	Response eQTL	-0.28869	Cell Proliferation On Day 52; Treated With Rotenone	Dopaminergic Neurons	GNL3	0	chr3:52675815-52675816	2.87960e-07	0.05626	Jerber2021NG	Jerber-2021-Nat. Genet	rs4130905
10.1038/s41588-021-00801-6	CL_0000700	Response eQTL	-0.28411	Cell Proliferation On Day 52; Treated With Rotenone	Dopaminergic Neurons	GNL3	1	chr3:52675243-52675244	2.99159e-07	0.05545	Jerber2021NG	Jerber-2021-Nat. Genet	rs12496634
10.1038/s41588-021-00801-6	CL_0000700	Response eQTL	-0.28869	Cell Proliferation On Day 52; Treated With Rotenone	Dopaminergic Neurons	GNL3	0	chr3:52674721-52674722	2.87960e-07	0.05626	Jerber2021NG	Jerber-2021-Nat. Genet	rs12496476
10.1038/s41588-021-00801-6	CL_0000700	Response eQTL	-0.28869	Cell Proliferation On Day 52; Treated With Rotenone	Dopaminergic Neurons	GNL3	1	chr3:52674413-52674414	2.87960e-07	0.05626	Jerber2021NG	Jerber-2021-Nat. Genet	rs34610142
10.1038/s41588-021-00801-6	CL_0000700	Response eQTL	-0.28869	Cell Proliferation On Day 52; Treated With Rotenone	Dopaminergic Neurons	GNL3	1	chr3:52674272-52674273	2.87960e-07	0.05626	Jerber2021NG	Jerber-2021-Nat. Genet	rs12632265
10.1038/s41588-021-00801-6	CL_0000700	Response eQTL	-0.26101	Cell Proliferation On Day 52; Treated With Rotenone	Dopaminergic Neurons	GNL3	0	chr3:52674059-52674060	5.28328e-06	0.05732	Jerber2021NG	Jerber-2021-Nat. Genet	rs6414569
10.1038/s41588-021-00801-6	CL_0000700	Response eQTL	-0.28092	Cell Proliferation On Day 52; Treated With Rotenone	Dopaminergic Neurons	GNL3	0	chr3:52674057-52674058	4.64169e-07	0.05573	Jerber2021NG	Jerber-2021-Nat. Genet	rs12637632
10.1038/s41588-021-00801-6	CL_0000700	Response eQTL	-0.28869	Cell Proliferation On Day 52; Treated With Rotenone	Dopaminergic Neurons	GNL3	1	chr3:52673010-52673011	2.87960e-07	0.05626	Jerber2021NG	Jerber-2021-Nat. Genet	rs6803012
10.1038/s41588-021-00801-6	CL_0000700	Response eQTL	-0.28869	Cell Proliferation On Day 52; Treated With Rotenone	Dopaminergic Neurons	GNL3	1	chr3:52672708-52672709	2.87960e-07	0.05626	Jerber2021NG	Jerber-2021-Nat. Genet	rs12493107
10.1038/s41588-021-00801-6	CL_0000700	Response eQTL	-0.28869	Cell Proliferation On Day 52; Treated With Rotenone	Dopaminergic Neurons	GNL3	1	chr3:52669599-52669600	2.87960e-07	0.05626	Jerber2021NG	Jerber-2021-Nat. Genet	rs6768697
10.1038/s41588-021-00801-6	CL_0000700	Response eQTL	-0.28081	Cell Proliferation On Day 52; Treated With Rotenone	Dopaminergic Neurons	GNL3	1	chr3:52667486-52667487	5.71508e-07	0.05615	Jerber2021NG	Jerber-2021-Nat. Genet	rs62255364
10.1038/s41588-021-00801-6	CL_0000700	Response eQTL	-0.28081	Cell Proliferation On Day 52; Treated With Rotenone	Dopaminergic Neurons	GNL3	1	chr3:52667485-52667486	5.71508e-07	0.05615	Jerber2021NG	Jerber-2021-Nat. Genet	rs77146033
10.1038/s41588-021-00801-6	CL_0000700	Response eQTL	-0.26274	Cell Proliferation On Day 52; Treated With Rotenone	Dopaminergic Neurons	GNL3	1	chr3:52666461-52666462	5.88535e-06	0.05799	Jerber2021NG	Jerber-2021-Nat. Genet	rs35976524
10.1038/s41588-021-00801-6	CL_0000700	Response eQTL	-0.28411	Cell Proliferation On Day 52; Treated With Rotenone	Dopaminergic Neurons	GNL3	1	chr3:52665725-52665726	2.99159e-07	0.05545	Jerber2021NG	Jerber-2021-Nat. Genet	rs62255362
10.1038/s41588-021-00801-6	CL_0000700	Response eQTL	-0.28411	Cell Proliferation On Day 52; Treated With Rotenone	Dopaminergic Neurons	GNL3	1	chr3:52664544-52664545	2.99159e-07	0.05545	Jerber2021NG	Jerber-2021-Nat. Genet	rs12488527
10.1038/s41588-021-00801-6	CL_0000700	Response eQTL	-0.28869	Cell Proliferation On Day 52; Treated With Rotenone	Dopaminergic Neurons	GNL3	0	chr3:52664401-52664402	2.87960e-07	0.05626	Jerber2021NG	Jerber-2021-Nat. Genet	rs12488461
10.1038/s41588-021-00801-6	CL_0000700	Response eQTL	-0.28411	Cell Proliferation On Day 52; Treated With Rotenone	Dopaminergic Neurons	GNL3	1	chr3:52663147-52663148	2.99159e-07	0.05545	Jerber2021NG	Jerber-2021-Nat. Genet	rs11130315
10.1038/s41588-021-00801-6	CL_0000700	Response eQTL	-0.28411	Cell Proliferation On Day 52; Treated With Rotenone	Dopaminergic Neurons	GNL3	1	chr3:52663066-52663067	2.99159e-07	0.05545	Jerber2021NG	Jerber-2021-Nat. Genet	rs11130314
10.1038/s41588-021-00801-6	CL_0000700	Response eQTL	-0.28411	Cell Proliferation On Day 52; Treated With Rotenone	Dopaminergic Neurons	GNL3	1	chr3:52662782-52662783	2.99159e-07	0.05545	Jerber2021NG	Jerber-2021-Nat. Genet	rs34168767
10.1038/s41588-021-00801-6	CL_0000700	Response eQTL	-0.2704	Cell Proliferation On Day 52; Treated With Rotenone	Dopaminergic Neurons	GNL3	1	chr3:52660182-52660183	1.84442e-06	0.05669	Jerber2021NG	Jerber-2021-Nat. Genet	rs6804145
10.1038/s41588-021-00801-6	CL_0000700	Response eQTL	-0.2704	Cell Proliferation On Day 52; Treated With Rotenone	Dopaminergic Neurons	GNL3	1	chr3:52658705-52658706	1.84442e-06	0.05669	Jerber2021NG	Jerber-2021-Nat. Genet	rs7611731
10.1038/s41588-021-00801-6	CL_0000700	Response eQTL	-0.28411	Cell Proliferation On Day 52; Treated With Rotenone	Dopaminergic Neurons	GNL3	1	chr3:52658343-52658344	2.99159e-07	0.05545	Jerber2021NG	Jerber-2021-Nat. Genet	rs2590846
10.1038/s41588-021-00801-6	CL_0000700	Response eQTL	-0.2704	Cell Proliferation On Day 52; Treated With Rotenone	Dopaminergic Neurons	GNL3	1	chr3:52658108-52658109	1.84442e-06	0.05669	Jerber2021NG	Jerber-2021-Nat. Genet	rs2336149
10.1038/s41588-021-00801-6	CL_0000700	Response eQTL	-0.28869	Cell Proliferation On Day 52; Treated With Rotenone	Dopaminergic Neurons	GNL3	1	chr3:52657096-52657097	2.87960e-07	0.05626	Jerber2021NG	Jerber-2021-Nat. Genet	rs12486847
10.1038/s41588-021-00801-6	CL_0000700	Response eQTL	-0.28869	Cell Proliferation On Day 52; Treated With Rotenone	Dopaminergic Neurons	GNL3	1	chr3:52656622-52656623	2.87960e-07	0.05626	Jerber2021NG	Jerber-2021-Nat. Genet	rs2336148
10.1038/s41588-021-00801-6	CL_0000700	Response eQTL	-0.28869	Cell Proliferation On Day 52; Treated With Rotenone	Dopaminergic Neurons	GNL3	1	chr3:52653670-52653671	2.87960e-07	0.05626	Jerber2021NG	Jerber-2021-Nat. Genet	rs35409678
10.1038/s41588-021-00801-6	CL_0000700	Response eQTL	0.23098	Cell Proliferation On Day 52; Treated With Rotenone	Dopaminergic Neurons	GNL3	1	chr3:52653550-52653551	1.79563e-05	0.05385	Jerber2021NG	Jerber-2021-Nat. Genet	rs7612511
10.1038/s41588-021-00801-6	CL_0000700	Response eQTL	-0.2704	Cell Proliferation On Day 52; Treated With Rotenone	Dopaminergic Neurons	GNL3	1	chr3:52653546-52653547	1.84442e-06	0.05669	Jerber2021NG	Jerber-2021-Nat. Genet	rs4435633
10.1038/s41588-021-00801-6	CL_0000700	Response eQTL	-0.28411	Cell Proliferation On Day 52; Treated With Rotenone	Dopaminergic Neurons	GNL3	1	chr3:52652871-52652872	2.99159e-07	0.05545	Jerber2021NG	Jerber-2021-Nat. Genet	rs6770463
10.1038/s41588-021-00801-6	CL_0000700	Response eQTL	0.23075	Cell Proliferation On Day 52; Treated With Rotenone	Dopaminergic Neurons	GNL3	1	chr3:52652700-52652701	3.49949e-05	0.05576	Jerber2021NG	Jerber-2021-Nat. Genet	rs2878632
10.1038/s41588-021-00801-6	CL_0000700	Response eQTL	-0.28869	Cell Proliferation On Day 52; Treated With Rotenone	Dopaminergic Neurons	GNL3	1	chr3:52651289-52651290	2.87960e-07	0.05626	Jerber2021NG	Jerber-2021-Nat. Genet	rs35211965
10.1038/s41588-021-00801-6	CL_0000700	Response eQTL	-0.28411	Cell Proliferation On Day 52; Treated With Rotenone	Dopaminergic Neurons	GNL3	1	chr3:52651228-52651229	2.99159e-07	0.05545	Jerber2021NG	Jerber-2021-Nat. Genet	rs13065019
10.1038/s41588-021-00801-6	CL_0000700	Response eQTL	-0.29372	Cell Proliferation On Day 52; Treated With Rotenone	Dopaminergic Neurons	GNL3	1	chr3:52650246-52650247	2.01346e-04	0.07901	Jerber2021NG	Jerber-2021-Nat. Genet	rs62253741
10.1038/s41588-021-00801-6	CL_0000700	Response eQTL	-0.2704	Cell Proliferation On Day 52; Treated With Rotenone	Dopaminergic Neurons	GNL3	1	chr3:52650112-52650113	1.84442e-06	0.05669	Jerber2021NG	Jerber-2021-Nat. Genet	rs62253740
10.1038/s41588-021-00801-6	CL_0000700	Response eQTL	-0.28411	Cell Proliferation On Day 52; Treated With Rotenone	Dopaminergic Neurons	GNL3	1	chr3:52649848-52649849	2.99159e-07	0.05545	Jerber2021NG	Jerber-2021-Nat. Genet	rs33967311
10.1038/s41588-021-00801-6	CL_0000700	Response eQTL	-0.28411	Cell Proliferation On Day 52; Treated With Rotenone	Dopaminergic Neurons	GNL3	1	chr3:52648930-52648931	2.99159e-07	0.05545	Jerber2021NG	Jerber-2021-Nat. Genet	rs2289250
10.1038/s41588-021-00801-6	CL_0000700	Response eQTL	-0.28411	Cell Proliferation On Day 52; Treated With Rotenone	Dopaminergic Neurons	GNL3	1	chr3:52648189-52648190	2.99159e-07	0.05545	Jerber2021NG	Jerber-2021-Nat. Genet	rs34757451
10.1038/s41588-021-00801-6	CL_0000700	Response eQTL	-0.28869	Cell Proliferation On Day 52; Treated With Rotenone	Dopaminergic Neurons	GNL3	1	chr3:52646807-52646808	2.87960e-07	0.05626	Jerber2021NG	Jerber-2021-Nat. Genet	rs2028216
10.1038/s41588-021-00801-6	CL_0000700	Response eQTL	-0.28411	Cell Proliferation On Day 52; Treated With Rotenone	Dopaminergic Neurons	GNL3	1	chr3:52644478-52644479	2.99159e-07	0.05545	Jerber2021NG	Jerber-2021-Nat. Genet	rs13086297
10.1038/s41588-021-00801-6	CL_0000700	Response eQTL	-0.2704	Cell Proliferation On Day 52; Treated With Rotenone	Dopaminergic Neurons	GNL3	1	chr3:52644354-52644355	1.84442e-06	0.05669	Jerber2021NG	Jerber-2021-Nat. Genet	rs13085775
10.1038/s41588-021-00801-6	CL_0000700	Response eQTL	-0.28411	Cell Proliferation On Day 52; Treated With Rotenone	Dopaminergic Neurons	GNL3	1	chr3:52644254-52644255	2.99159e-07	0.05545	Jerber2021NG	Jerber-2021-Nat. Genet	rs13085895
10.1038/s41588-021-00801-6	CL_0000700	Response eQTL	-0.28411	Cell Proliferation On Day 52; Treated With Rotenone	Dopaminergic Neurons	GNL3	1	chr3:52643944-52643945	2.99159e-07	0.05545	Jerber2021NG	Jerber-2021-Nat. Genet	rs7642198
10.1038/s41588-021-00801-6	CL_0000700	Response eQTL	-0.28411	Cell Proliferation On Day 52; Treated With Rotenone	Dopaminergic Neurons	GNL3	1	chr3:52642174-52642175	2.99159e-07	0.05545	Jerber2021NG	Jerber-2021-Nat. Genet	rs11130313
10.1038/s41588-021-00801-6	CL_0000700	Response eQTL	-0.28411	Cell Proliferation On Day 52; Treated With Rotenone	Dopaminergic Neurons	GNL3	1	chr3:52641263-52641264	2.99159e-07	0.05545	Jerber2021NG	Jerber-2021-Nat. Genet	rs13086898
10.1038/s41588-021-00801-6	CL_0000700	Response eQTL	-0.28411	Cell Proliferation On Day 52; Treated With Rotenone	Dopaminergic Neurons	GNL3	1	chr3:52641039-52641040	2.99159e-07	0.05545	Jerber2021NG	Jerber-2021-Nat. Genet	rs11130312
10.1038/s41588-021-00801-6	CL_0000700	Response eQTL	-0.28411	Cell Proliferation On Day 52; Treated With Rotenone	Dopaminergic Neurons	GNL3	1	chr3:52640989-52640990	2.99159e-07	0.05545	Jerber2021NG	Jerber-2021-Nat. Genet	rs11130311
10.1038/s41588-021-00801-6	CL_0000700	Response eQTL	-0.2704	Cell Proliferation On Day 52; Treated With Rotenone	Dopaminergic Neurons	GNL3	1	chr3:52640651-52640652	1.84442e-06	0.05669	Jerber2021NG	Jerber-2021-Nat. Genet	rs11130310
10.1038/s41588-021-00801-6	CL_0000700	Response eQTL	-0.28411	Cell Proliferation On Day 52; Treated With Rotenone	Dopaminergic Neurons	GNL3	1	chr3:52640526-52640527	2.99159e-07	0.05545	Jerber2021NG	Jerber-2021-Nat. Genet	rs13081031
10.1038/s41588-021-00801-6	CL_0000700	Response eQTL	-0.28411	Cell Proliferation On Day 52; Treated With Rotenone	Dopaminergic Neurons	GNL3	0	chr3:52640284-52640285	2.99159e-07	0.05545	Jerber2021NG	Jerber-2021-Nat. Genet	rs13060675
10.1038/s41588-021-00801-6	CL_0000700	Response eQTL	-0.28869	Cell Proliferation On Day 52; Treated With Rotenone	Dopaminergic Neurons	GNL3	1	chr3:52638726-52638727	2.87960e-07	0.05626	Jerber2021NG	Jerber-2021-Nat. Genet	rs11720432
10.1038/s41588-021-00801-6	CL_0000700	Response eQTL	-0.28869	Cell Proliferation On Day 52; Treated With Rotenone	Dopaminergic Neurons	GNL3	1	chr3:52638515-52638516	2.87960e-07	0.05626	Jerber2021NG	Jerber-2021-Nat. Genet	rs11719514
10.1038/s41588-021-00801-6	CL_0000700	Response eQTL	-0.28411	Cell Proliferation On Day 52; Treated With Rotenone	Dopaminergic Neurons	GNL3	1	chr3:52638151-52638152	2.99159e-07	0.05545	Jerber2021NG	Jerber-2021-Nat. Genet	rs13068293
10.1038/s41588-021-00801-6	CL_0000700	Response eQTL	-0.2704	Cell Proliferation On Day 52; Treated With Rotenone	Dopaminergic Neurons	GNL3	1	chr3:52636028-52636029	1.84442e-06	0.05669	Jerber2021NG	Jerber-2021-Nat. Genet	rs13098776
10.1038/s41588-021-00801-6	CL_0000700	Response eQTL	-0.2704	Cell Proliferation On Day 52; Treated With Rotenone	Dopaminergic Neurons	GNL3	1	chr3:52635373-52635374	1.84442e-06	0.05669	Jerber2021NG	Jerber-2021-Nat. Genet	rs6796726
10.1038/s41588-021-00801-6	CL_0000700	Response eQTL	-0.27964	Cell Proliferation On Day 52; Treated With Rotenone	Dopaminergic Neurons	GNL3	1	chr3:52634103-52634104	1.09003e-06	0.05737	Jerber2021NG	Jerber-2021-Nat. Genet	rs2083180
10.1038/s41588-021-00801-6	CL_0000700	Response eQTL	-0.28411	Cell Proliferation On Day 52; Treated With Rotenone	Dopaminergic Neurons	GNL3	1	chr3:52632850-52632851	2.99159e-07	0.05545	Jerber2021NG	Jerber-2021-Nat. Genet	rs13069481
10.1038/s41588-021-00801-6	CL_0000700	Response eQTL	-0.28411	Cell Proliferation On Day 52; Treated With Rotenone	Dopaminergic Neurons	GNL3	1	chr3:52632634-52632635	2.99159e-07	0.05545	Jerber2021NG	Jerber-2021-Nat. Genet	rs4687548
10.1038/s41588-021-00801-6	CL_0000700	Response eQTL	-0.2704	Cell Proliferation On Day 52; Treated With Rotenone	Dopaminergic Neurons	GNL3	1	chr3:52629866-52629867	1.84442e-06	0.05669	Jerber2021NG	Jerber-2021-Nat. Genet	rs7622694
10.1038/s41588-021-00801-6	CL_0000700	Response eQTL	-0.2704	Cell Proliferation On Day 52; Treated With Rotenone	Dopaminergic Neurons	GNL3	1	chr3:52628706-52628707	1.84442e-06	0.05669	Jerber2021NG	Jerber-2021-Nat. Genet	rs6445529
10.1038/s41588-021-00801-6	CL_0000700	Response eQTL	-0.28411	Cell Proliferation On Day 52; Treated With Rotenone	Dopaminergic Neurons	GNL3	1	chr3:52627624-52627625	2.99159e-07	0.05545	Jerber2021NG	Jerber-2021-Nat. Genet	rs35249778
10.1038/s41588-021-00801-6	CL_0000700	Response eQTL	-0.28411	Cell Proliferation On Day 52; Treated With Rotenone	Dopaminergic Neurons	GNL3	1	chr3:52625947-52625948	2.99159e-07	0.05545	Jerber2021NG	Jerber-2021-Nat. Genet	rs1561337
10.1038/s41588-021-00801-6	CL_0000700	Response eQTL	-0.28411	Cell Proliferation On Day 52; Treated With Rotenone	Dopaminergic Neurons	GNL3	1	chr3:52625108-52625109	2.99159e-07	0.05545	Jerber2021NG	Jerber-2021-Nat. Genet	rs34215106
10.1038/s41588-021-00801-6	CL_0000700	Response eQTL	-0.28869	Cell Proliferation On Day 52; Treated With Rotenone	Dopaminergic Neurons	GNL3	1	chr3:52623456-52623457	2.87960e-07	0.05626	Jerber2021NG	Jerber-2021-Nat. Genet	rs34537256
10.1038/s41588-021-00801-6	CL_0000700	Response eQTL	-0.28411	Cell Proliferation On Day 52; Treated With Rotenone	Dopaminergic Neurons	GNL3	1	chr3:52622986-52622987	2.99159e-07	0.05545	Jerber2021NG	Jerber-2021-Nat. Genet	rs13064064
10.1038/s41588-021-00801-6	CL_0000700	Response eQTL	-0.28411	Cell Proliferation On Day 52; Treated With Rotenone	Dopaminergic Neurons	GNL3	1	chr3:52622324-52622325	2.99159e-07	0.05545	Jerber2021NG	Jerber-2021-Nat. Genet	rs4687639
10.1038/s41588-021-00801-6	CL_0000700	Response eQTL	-0.28411	Cell Proliferation On Day 52; Treated With Rotenone	Dopaminergic Neurons	GNL3	1	chr3:52622076-52622077	2.99159e-07	0.05545	Jerber2021NG	Jerber-2021-Nat. Genet	rs11717043
10.1038/s41588-021-00801-6	CL_0000700	Response eQTL	-0.2704	Cell Proliferation On Day 52; Treated With Rotenone	Dopaminergic Neurons	GNL3	1	chr3:52621399-52621400	1.84442e-06	0.05669	Jerber2021NG	Jerber-2021-Nat. Genet	rs34341238
10.1038/s41588-021-00801-6	CL_0000700	Response eQTL	-0.28869	Cell Proliferation On Day 52; Treated With Rotenone	Dopaminergic Neurons	GNL3	1	chr3:52619398-52619399	2.87960e-07	0.05626	Jerber2021NG	Jerber-2021-Nat. Genet	rs62253733
10.1038/s41588-021-00801-6	CL_0000700	Response eQTL	-0.28869	Cell Proliferation On Day 52; Treated With Rotenone	Dopaminergic Neurons	GNL3	0	chr3:52617950-52617951	2.87960e-07	0.05626	Jerber2021NG	Jerber-2021-Nat. Genet	rs4687638
10.1038/s41588-021-00801-6	CL_0000700	Response eQTL	-0.26274	Cell Proliferation On Day 52; Treated With Rotenone	Dopaminergic Neurons	GNL3	1	chr3:52616332-52616333	5.88535e-06	0.05799	Jerber2021NG	Jerber-2021-Nat. Genet	rs10510760
10.1038/s41588-021-00801-6	CL_0000700	Response eQTL	-0.22768	Cell Proliferation On Day 52; Treated With Rotenone	Dopaminergic Neurons	GNL3	1	chr3:52615732-52615733	2.01494e-05	0.05341	Jerber2021NG	Jerber-2021-Nat. Genet	rs13083798
10.1038/s41588-021-00801-6	CL_0000700	Response eQTL	-0.21505	Cell Proliferation On Day 52; Treated With Rotenone	Dopaminergic Neurons	GNL3	1	chr3:52614249-52614250	5.74429e-05	0.05345	Jerber2021NG	Jerber-2021-Nat. Genet	rs9879090
10.1038/s41588-021-00801-6	CL_0000700	Response eQTL	-0.28869	Cell Proliferation On Day 52; Treated With Rotenone	Dopaminergic Neurons	GNL3	1	chr3:52613433-52613434	2.87960e-07	0.05626	Jerber2021NG	Jerber-2021-Nat. Genet	rs11709448
10.1038/s41588-021-00801-6	CL_0000700	Response eQTL	-0.28869	Cell Proliferation On Day 52; Treated With Rotenone	Dopaminergic Neurons	GNL3	1	chr3:52610820-52610821	2.87960e-07	0.05626	Jerber2021NG	Jerber-2021-Nat. Genet	rs13065851
10.1038/s41588-021-00801-6	CL_0000700	Response eQTL	-0.28411	Cell Proliferation On Day 52; Treated With Rotenone	Dopaminergic Neurons	GNL3	1	chr3:52609669-52609670	2.99159e-07	0.05545	Jerber2021NG	Jerber-2021-Nat. Genet	rs3755806
10.1038/s41588-021-00801-6	CL_0000700	Response eQTL	-0.2704	Cell Proliferation On Day 52; Treated With Rotenone	Dopaminergic Neurons	GNL3	1	chr3:52609291-52609292	1.84442e-06	0.05669	Jerber2021NG	Jerber-2021-Nat. Genet	rs3733045
10.1038/s41588-021-00801-6	CL_0000700	Response eQTL	-0.28411	Cell Proliferation On Day 52; Treated With Rotenone	Dopaminergic Neurons	GNL3	1	chr3:52608920-52608921	2.99159e-07	0.05545	Jerber2021NG	Jerber-2021-Nat. Genet	rs12487591
10.1038/s41588-021-00801-6	CL_0000700	Response eQTL	-0.28411	Cell Proliferation On Day 52; Treated With Rotenone	Dopaminergic Neurons	GNL3	1	chr3:52608471-52608472	2.99159e-07	0.05545	Jerber2021NG	Jerber-2021-Nat. Genet	rs3774365
10.1038/s41588-021-00801-6	CL_0000700	Response eQTL	-0.2704	Cell Proliferation On Day 52; Treated With Rotenone	Dopaminergic Neurons	GNL3	1	chr3:52607239-52607240	1.84442e-06	0.05669	Jerber2021NG	Jerber-2021-Nat. Genet	rs3774366
10.1038/s41588-021-00801-6	CL_0000700	Response eQTL	-0.25126	Cell Proliferation On Day 52; Treated With Rotenone	Dopaminergic Neurons	GNL3	1	chr3:52605241-52605242	6.83310e-06	0.05585	Jerber2021NG	Jerber-2021-Nat. Genet	rs11130308
10.1038/s41588-021-00801-6	CL_0000700	Response eQTL	-0.28411	Cell Proliferation On Day 52; Treated With Rotenone	Dopaminergic Neurons	GNL3	1	chr3:52604466-52604467	2.99159e-07	0.05545	Jerber2021NG	Jerber-2021-Nat. Genet	rs10433615
10.1038/s41588-021-00801-6	CL_0000700	Response eQTL	-0.21505	Cell Proliferation On Day 52; Treated With Rotenone	Dopaminergic Neurons	GNL3	1	chr3:52603470-52603471	5.74429e-05	0.05345	Jerber2021NG	Jerber-2021-Nat. Genet	rs2276824
10.1038/s41588-021-00801-6	CL_0000700	Response eQTL	-0.2704	Cell Proliferation On Day 52; Treated With Rotenone	Dopaminergic Neurons	GNL3	1	chr3:52600603-52600604	1.84442e-06	0.05669	Jerber2021NG	Jerber-2021-Nat. Genet	rs9917834
10.1038/s41588-021-00801-6	CL_0000700	Response eQTL	-0.28869	Cell Proliferation On Day 52; Treated With Rotenone	Dopaminergic Neurons	GNL3	1	chr3:52600589-52600590	2.87960e-07	0.05626	Jerber2021NG	Jerber-2021-Nat. Genet	rs34173654
10.1038/s41588-021-00801-6	CL_0000700	Response eQTL	-0.26714	Cell Proliferation On Day 52; Treated With Rotenone	Dopaminergic Neurons	GNL3	1	chr3:52600076-52600077	3.08780e-06	0.05727	Jerber2021NG	Jerber-2021-Nat. Genet	rs4687637
10.1038/s41588-021-00801-6	CL_0000700	Response eQTL	-0.28869	Cell Proliferation On Day 52; Treated With Rotenone	Dopaminergic Neurons	GNL3	1	chr3:52599913-52599914	2.87960e-07	0.05626	Jerber2021NG	Jerber-2021-Nat. Genet	rs4687636
10.1038/s41588-021-00801-6	CL_0000700	Response eQTL	-0.28411	Cell Proliferation On Day 52; Treated With Rotenone	Dopaminergic Neurons	GNL3	1	chr3:52598895-52598896	2.99159e-07	0.05545	Jerber2021NG	Jerber-2021-Nat. Genet	rs6790330
10.1038/s41588-021-00801-6	CL_0000700	Response eQTL	-0.28411	Cell Proliferation On Day 52; Treated With Rotenone	Dopaminergic Neurons	GNL3	1	chr3:52598341-52598342	2.99159e-07	0.05545	Jerber2021NG	Jerber-2021-Nat. Genet	rs62253703
10.1038/s41588-021-00801-6	CL_0000700	Response eQTL	-0.28411	Cell Proliferation On Day 52; Treated With Rotenone	Dopaminergic Neurons	GNL3	1	chr3:52596532-52596533	2.99159e-07	0.05545	Jerber2021NG	Jerber-2021-Nat. Genet	rs4687633
10.1038/s41588-021-00801-6	CL_0000700	Response eQTL	-0.28869	Cell Proliferation On Day 52; Treated With Rotenone	Dopaminergic Neurons	GNL3	1	chr3:52595734-52595735	2.87960e-07	0.05626	Jerber2021NG	Jerber-2021-Nat. Genet	rs2336145
10.1038/s41588-021-00801-6	CL_0000700	Response eQTL	-0.28411	Cell Proliferation On Day 52; Treated With Rotenone	Dopaminergic Neurons	GNL3	1	chr3:52595617-52595618	2.99159e-07	0.05545	Jerber2021NG	Jerber-2021-Nat. Genet	rs2164884
10.1038/s41588-021-00801-6	CL_0000700	Response eQTL	-0.28869	Cell Proliferation On Day 52; Treated With Rotenone	Dopaminergic Neurons	GNL3	1	chr3:52595370-52595371	2.87960e-07	0.05626	Jerber2021NG	Jerber-2021-Nat. Genet	rs2118540
10.1038/s41588-021-00801-6	CL_0000700	Response eQTL	-0.2704	Cell Proliferation On Day 52; Treated With Rotenone	Dopaminergic Neurons	GNL3	1	chr3:52595161-52595162	1.84442e-06	0.05669	Jerber2021NG	Jerber-2021-Nat. Genet	rs34754793
10.1038/s41588-021-00801-6	CL_0000700	Response eQTL	-0.28869	Cell Proliferation On Day 52; Treated With Rotenone	Dopaminergic Neurons	GNL3	1	chr3:52594800-52594801	2.87960e-07	0.05626	Jerber2021NG	Jerber-2021-Nat. Genet	rs11714419
10.1038/s41588-021-00801-6	CL_0000700	Response eQTL	-0.28009	Cell Proliferation On Day 52; Treated With Rotenone	Dopaminergic Neurons	GNL3	1	chr3:52594305-52594306	3.43597e-07	0.05494	Jerber2021NG	Jerber-2021-Nat. Genet	rs7628578
10.1038/s41588-021-00801-6	CL_0000700	Response eQTL	-0.23417	Cell Proliferation On Day 52; Treated With Rotenone	Dopaminergic Neurons	GNL3	1	chr3:52594040-52594041	5.74385e-06	0.05163	Jerber2021NG	Jerber-2021-Nat. Genet	rs2577831
10.1038/s41588-021-00801-6	CL_0000700	Response eQTL	-0.28411	Cell Proliferation On Day 52; Treated With Rotenone	Dopaminergic Neurons	GNL3	1	chr3:52593644-52593645	2.99159e-07	0.05545	Jerber2021NG	Jerber-2021-Nat. Genet	rs12498066
10.1038/s41588-021-00801-6	CL_0000700	Response eQTL	-0.28411	Cell Proliferation On Day 52; Treated With Rotenone	Dopaminergic Neurons	GNL3	1	chr3:52593470-52593471	2.99159e-07	0.05545	Jerber2021NG	Jerber-2021-Nat. Genet	rs13085331
10.1038/s41588-021-00801-6	CL_0000700	Response eQTL	-0.2704	Cell Proliferation On Day 52; Treated With Rotenone	Dopaminergic Neurons	GNL3	1	chr3:52592630-52592631	1.84442e-06	0.05669	Jerber2021NG	Jerber-2021-Nat. Genet	rs2336146
10.1038/s41588-021-00801-6	CL_0000700	Response eQTL	-0.23098	Cell Proliferation On Day 52; Treated With Rotenone	Dopaminergic Neurons	GNL3	1	chr3:52592427-52592428	1.79563e-05	0.05385	Jerber2021NG	Jerber-2021-Nat. Genet	rs2336147
10.1038/s41588-021-00801-6	CL_0000700	Response eQTL	-0.28411	Cell Proliferation On Day 52; Treated With Rotenone	Dopaminergic Neurons	GNL3	1	chr3:52591003-52591004	2.99159e-07	0.05545	Jerber2021NG	Jerber-2021-Nat. Genet	rs62253700
10.1038/s41588-021-00801-6	CL_0000700	Response eQTL	-0.28411	Cell Proliferation On Day 52; Treated With Rotenone	Dopaminergic Neurons	GNL3	1	chr3:52590753-52590754	2.99159e-07	0.05545	Jerber2021NG	Jerber-2021-Nat. Genet	rs68021750
10.1038/s41588-021-00801-6	CL_0000700	Response eQTL	-0.28869	Cell Proliferation On Day 52; Treated With Rotenone	Dopaminergic Neurons	GNL3	1	chr3:52590707-52590708	2.87960e-07	0.05626	Jerber2021NG	Jerber-2021-Nat. Genet	rs11708075
10.1038/s41588-021-00801-6	CL_0000700	Response eQTL	-0.28869	Cell Proliferation On Day 52; Treated With Rotenone	Dopaminergic Neurons	GNL3	1	chr3:52590217-52590218	2.87960e-07	0.05626	Jerber2021NG	Jerber-2021-Nat. Genet	rs4336110
10.1038/s41588-021-00801-6	CL_0000700	Response eQTL	-0.23098	Cell Proliferation On Day 52; Treated With Rotenone	Dopaminergic Neurons	GNL3	1	chr3:52588070-52588071	1.79563e-05	0.05385	Jerber2021NG	Jerber-2021-Nat. Genet	rs2590838
10.1038/s41588-021-00801-6	CL_0000700	Response eQTL	-0.2704	Cell Proliferation On Day 52; Treated With Rotenone	Dopaminergic Neurons	GNL3	1	chr3:52587823-52587824	1.84442e-06	0.05669	Jerber2021NG	Jerber-2021-Nat. Genet	rs3852066
10.1038/s41588-021-00801-6	CL_0000700	Response eQTL	-0.2704	Cell Proliferation On Day 52; Treated With Rotenone	Dopaminergic Neurons	GNL3	1	chr3:52587611-52587612	1.84442e-06	0.05669	Jerber2021NG	Jerber-2021-Nat. Genet	rs3733046
10.1038/s41588-021-00801-6	CL_0000700	Response eQTL	-0.27604	Cell Proliferation On Day 52; Treated With Rotenone	Dopaminergic Neurons	GNL3	0	chr3:52585946-52585947	1.41390e-06	0.05723	Jerber2021NG	Jerber-2021-Nat. Genet	rs12637627
10.1038/s41588-021-00801-6	CL_0000700	Response eQTL	-0.27294	Cell Proliferation On Day 52; Treated With Rotenone	Dopaminergic Neurons	GNL3	1	chr3:52585820-52585821	2.37037e-06	0.05784	Jerber2021NG	Jerber-2021-Nat. Genet	rs12629701
10.1038/s41588-021-00801-6	CL_0000700	Response eQTL	-0.27604	Cell Proliferation On Day 52; Treated With Rotenone	Dopaminergic Neurons	GNL3	1	chr3:52585776-52585777	1.41390e-06	0.05723	Jerber2021NG	Jerber-2021-Nat. Genet	rs12629699
10.1038/s41588-021-00801-6	CL_0000700	Response eQTL	-0.27604	Cell Proliferation On Day 52; Treated With Rotenone	Dopaminergic Neurons	GNL3	0	chr3:52584925-52584926	1.41390e-06	0.05723	Jerber2021NG	Jerber-2021-Nat. Genet	rs7614498
10.1038/s41588-021-00801-6	CL_0000700	Response eQTL	-0.29571	Cell Proliferation On Day 52; Treated With Rotenone	Dopaminergic Neurons	GNL3	1	chr3:52584303-52584304	2.00684e-07	0.05688	Jerber2021NG	Jerber-2021-Nat. Genet	rs12487445
10.1038/s41588-021-00801-6	CL_0000700	Response eQTL	-0.27604	Cell Proliferation On Day 52; Treated With Rotenone	Dopaminergic Neurons	GNL3	1	chr3:52584002-52584003	1.41390e-06	0.05723	Jerber2021NG	Jerber-2021-Nat. Genet	rs11720243
10.1038/s41588-021-00801-6	CL_0000700	Response eQTL	-0.27604	Cell Proliferation On Day 52; Treated With Rotenone	Dopaminergic Neurons	GNL3	1	chr3:52583786-52583787	1.41390e-06	0.05723	Jerber2021NG	Jerber-2021-Nat. Genet	rs11720159
10.1038/s41588-021-00801-6	CL_0000700	Response eQTL	-0.29571	Cell Proliferation On Day 52; Treated With Rotenone	Dopaminergic Neurons	GNL3	1	chr3:52582962-52582963	2.00684e-07	0.05688	Jerber2021NG	Jerber-2021-Nat. Genet	rs13078422
10.1038/s41588-021-00801-6	CL_0000700	Response eQTL	-0.28922	Cell Proliferation On Day 52; Treated With Rotenone	Dopaminergic Neurons	GNL3	1	chr3:52581285-52581286	2.29194e-07	0.0559	Jerber2021NG	Jerber-2021-Nat. Genet	rs4687630
10.1038/s41588-021-00801-6	CL_0000700	Response eQTL	-0.27604	Cell Proliferation On Day 52; Treated With Rotenone	Dopaminergic Neurons	GNL3	1	chr3:52581211-52581212	1.41390e-06	0.05723	Jerber2021NG	Jerber-2021-Nat. Genet	rs4687629
10.1038/s41588-021-00801-6	CL_0000700	Response eQTL	-0.28922	Cell Proliferation On Day 52; Treated With Rotenone	Dopaminergic Neurons	GNL3	1	chr3:52580654-52580655	2.29194e-07	0.0559	Jerber2021NG	Jerber-2021-Nat. Genet	rs11718509
10.1038/s41588-021-00801-6	CL_0000700	Response eQTL	-0.29571	Cell Proliferation On Day 52; Treated With Rotenone	Dopaminergic Neurons	GNL3	1	chr3:52579640-52579641	2.00684e-07	0.05688	Jerber2021NG	Jerber-2021-Nat. Genet	rs35107891
10.1038/s41588-021-00801-6	CL_0000700	Response eQTL	-0.29571	Cell Proliferation On Day 52; Treated With Rotenone	Dopaminergic Neurons	GNL3	1	chr3:52578162-52578163	2.00684e-07	0.05688	Jerber2021NG	Jerber-2021-Nat. Genet	rs34115864
10.1038/s41588-021-00801-6	CL_0000700	Response eQTL	-0.28922	Cell Proliferation On Day 52; Treated With Rotenone	Dopaminergic Neurons	GNL3	1	chr3:52578143-52578144	2.29194e-07	0.0559	Jerber2021NG	Jerber-2021-Nat. Genet	rs34954168
10.1038/s41588-021-00801-6	CL_0000700	Response eQTL	-0.27294	Cell Proliferation On Day 52; Treated With Rotenone	Dopaminergic Neurons	GNL3	1	chr3:52577397-52577398	2.37037e-06	0.05784	Jerber2021NG	Jerber-2021-Nat. Genet	rs11718420
10.1038/s41588-021-00801-6	CL_0000700	Response eQTL	-0.29571	Cell Proliferation On Day 52; Treated With Rotenone	Dopaminergic Neurons	GNL3	1	chr3:52576635-52576636	2.00684e-07	0.05688	Jerber2021NG	Jerber-2021-Nat. Genet	rs17264436
10.1038/s41588-021-00801-6	CL_0000700	Response eQTL	-0.27604	Cell Proliferation On Day 52; Treated With Rotenone	Dopaminergic Neurons	GNL3	1	chr3:52576399-52576400	1.41390e-06	0.05723	Jerber2021NG	Jerber-2021-Nat. Genet	rs7652191
10.1038/s41588-021-00801-6	CL_0000700	Response eQTL	-0.27232	Cell Proliferation On Day 52; Treated With Rotenone	Dopaminergic Neurons	GNL3	0	chr3:52575694-52575695	3.51691e-06	0.05871	Jerber2021NG	Jerber-2021-Nat. Genet	rs6805539
10.1038/s41588-021-00801-6	CL_0000700	Response eQTL	-0.27604	Cell Proliferation On Day 52; Treated With Rotenone	Dopaminergic Neurons	GNL3	1	chr3:52575346-52575347	1.41390e-06	0.05723	Jerber2021NG	Jerber-2021-Nat. Genet	rs6805156
10.1038/s41588-021-00801-6	CL_0000700	Response eQTL	-0.28922	Cell Proliferation On Day 52; Treated With Rotenone	Dopaminergic Neurons	GNL3	1	chr3:52575141-52575142	2.29194e-07	0.0559	Jerber2021NG	Jerber-2021-Nat. Genet	rs6762457
10.1038/s41588-021-00801-6	CL_0000700	Response eQTL	-0.28922	Cell Proliferation On Day 52; Treated With Rotenone	Dopaminergic Neurons	GNL3	1	chr3:52574933-52574934	2.29194e-07	0.0559	Jerber2021NG	Jerber-2021-Nat. Genet	rs4687547
10.1038/s41588-021-00801-6	CL_0000700	Response eQTL	-0.29571	Cell Proliferation On Day 52; Treated With Rotenone	Dopaminergic Neurons	GNL3	1	chr3:52573669-52573670	2.00684e-07	0.05688	Jerber2021NG	Jerber-2021-Nat. Genet	rs12632381
10.1038/s41588-021-00801-6	CL_0000700	Response eQTL	-0.29571	Cell Proliferation On Day 52; Treated With Rotenone	Dopaminergic Neurons	GNL3	1	chr3:52573666-52573667	2.00684e-07	0.05688	Jerber2021NG	Jerber-2021-Nat. Genet	rs11130307
10.1038/s41588-021-00801-6	CL_0000700	Response eQTL	-0.27604	Cell Proliferation On Day 52; Treated With Rotenone	Dopaminergic Neurons	GNL3	1	chr3:52572350-52572351	1.41390e-06	0.05723	Jerber2021NG	Jerber-2021-Nat. Genet	rs7625743
10.1038/s41588-021-00801-6	CL_0000700	Response eQTL	-0.27294	Cell Proliferation On Day 52; Treated With Rotenone	Dopaminergic Neurons	GNL3	1	chr3:52572276-52572277	2.37037e-06	0.05784	Jerber2021NG	Jerber-2021-Nat. Genet	rs11714565
10.1038/s41588-021-00801-6	CL_0000700	Response eQTL	-0.29571	Cell Proliferation On Day 52; Treated With Rotenone	Dopaminergic Neurons	GNL3	1	chr3:52571958-52571959	2.00684e-07	0.05688	Jerber2021NG	Jerber-2021-Nat. Genet	rs7623199
10.1038/s41588-021-00801-6	CL_0000700	Response eQTL	-0.27294	Cell Proliferation On Day 52; Treated With Rotenone	Dopaminergic Neurons	GNL3	1	chr3:52571927-52571928	2.37037e-06	0.05784	Jerber2021NG	Jerber-2021-Nat. Genet	rs4687546
10.1038/s41588-021-00801-6	CL_0000700	Response eQTL	-0.27294	Cell Proliferation On Day 52; Treated With Rotenone	Dopaminergic Neurons	GNL3	1	chr3:52571120-52571121	2.37037e-06	0.05784	Jerber2021NG	Jerber-2021-Nat. Genet	rs6788993
10.1038/s41588-021-00801-6	CL_0000700	Response eQTL	-0.27467	Cell Proliferation On Day 52; Treated With Rotenone	Dopaminergic Neurons	GNL3	1	chr3:52570989-52570990	2.37759e-06	0.05821	Jerber2021NG	Jerber-2021-Nat. Genet	rs6788887
10.1038/s41588-021-00801-6	CL_0000700	Response eQTL	-0.27604	Cell Proliferation On Day 52; Treated With Rotenone	Dopaminergic Neurons	GNL3	1	chr3:52570845-52570846	1.41390e-06	0.05723	Jerber2021NG	Jerber-2021-Nat. Genet	rs6786043
10.1038/s41588-021-00801-6	CL_0000700	Response eQTL	-0.27294	Cell Proliferation On Day 52; Treated With Rotenone	Dopaminergic Neurons	GNL3	1	chr3:52570164-52570165	2.37037e-06	0.05784	Jerber2021NG	Jerber-2021-Nat. Genet	rs9758945
10.1038/s41588-021-00801-6	CL_0000700	Response eQTL	-0.27294	Cell Proliferation On Day 52; Treated With Rotenone	Dopaminergic Neurons	GNL3	1	chr3:52569336-52569337	2.37037e-06	0.05784	Jerber2021NG	Jerber-2021-Nat. Genet	rs10433550
10.1038/s41588-021-00801-6	CL_0000700	Response eQTL	-0.27604	Cell Proliferation On Day 52; Treated With Rotenone	Dopaminergic Neurons	GNL3	1	chr3:52568258-52568259	1.41390e-06	0.05723	Jerber2021NG	Jerber-2021-Nat. Genet	rs13063160
10.1038/s41588-021-00801-6	CL_0000700	Response eQTL	-0.27604	Cell Proliferation On Day 52; Treated With Rotenone	Dopaminergic Neurons	GNL3	1	chr3:52566983-52566984	1.41390e-06	0.05723	Jerber2021NG	Jerber-2021-Nat. Genet	rs1821879
10.1038/s41588-021-00801-6	CL_0000700	Response eQTL	-0.29571	Cell Proliferation On Day 52; Treated With Rotenone	Dopaminergic Neurons	GNL3	1	chr3:52565906-52565907	2.00684e-07	0.05688	Jerber2021NG	Jerber-2021-Nat. Genet	rs6798246
10.1038/s41588-021-00801-6	CL_0000700	Response eQTL	-0.27294	Cell Proliferation On Day 52; Treated With Rotenone	Dopaminergic Neurons	GNL3	1	chr3:52565773-52565774	2.37037e-06	0.05784	Jerber2021NG	Jerber-2021-Nat. Genet	rs6786919
10.1038/s41588-021-00801-6	CL_0000700	Response eQTL	-0.27294	Cell Proliferation On Day 52; Treated With Rotenone	Dopaminergic Neurons	GNL3	1	chr3:52564592-52564593	2.37037e-06	0.05784	Jerber2021NG	Jerber-2021-Nat. Genet	rs13060048
10.1038/s41588-021-00801-6	CL_0000700	Response eQTL	-0.27604	Cell Proliferation On Day 52; Treated With Rotenone	Dopaminergic Neurons	GNL3	1	chr3:52564524-52564525	1.41390e-06	0.05723	Jerber2021NG	Jerber-2021-Nat. Genet	rs13059862
10.1038/s41588-021-00801-6	CL_0000700	Response eQTL	-0.29571	Cell Proliferation On Day 52; Treated With Rotenone	Dopaminergic Neurons	GNL3	1	chr3:52563648-52563649	2.00684e-07	0.05688	Jerber2021NG	Jerber-2021-Nat. Genet	rs2289249
10.1038/s41588-021-00801-6	CL_0000700	Response eQTL	-0.28952	Cell Proliferation On Day 52; Treated With Rotenone	Dopaminergic Neurons	GNL3	1	chr3:52562898-52562899	2.37703e-07	0.05603	Jerber2021NG	Jerber-2021-Nat. Genet	rs33964154
10.1038/s41588-021-00801-6	CL_0000700	Response eQTL	-0.29571	Cell Proliferation On Day 52; Treated With Rotenone	Dopaminergic Neurons	GNL3	1	chr3:52562382-52562383	2.00684e-07	0.05688	Jerber2021NG	Jerber-2021-Nat. Genet	rs6778844
10.1038/s41588-021-00801-6	CL_0000700	Response eQTL	-0.27294	Cell Proliferation On Day 52; Treated With Rotenone	Dopaminergic Neurons	GNL3	1	chr3:52559214-52559215	2.37037e-06	0.05784	Jerber2021NG	Jerber-2021-Nat. Genet	rs3796353
10.1038/s41588-021-00801-6	CL_0000700	Response eQTL	-0.27294	Cell Proliferation On Day 52; Treated With Rotenone	Dopaminergic Neurons	GNL3	1	chr3:52559122-52559123	2.37037e-06	0.05784	Jerber2021NG	Jerber-2021-Nat. Genet	rs17052259
10.1038/s41588-021-00801-6	CL_0000700	Response eQTL	-0.27294	Cell Proliferation On Day 52; Treated With Rotenone	Dopaminergic Neurons	GNL3	1	chr3:52559103-52559104	2.37037e-06	0.05784	Jerber2021NG	Jerber-2021-Nat. Genet	rs17052256
10.1038/s41588-021-00801-6	CL_0000700	Response eQTL	-0.27294	Cell Proliferation On Day 52; Treated With Rotenone	Dopaminergic Neurons	GNL3	1	chr3:52552666-52552667	2.37037e-06	0.05784	Jerber2021NG	Jerber-2021-Nat. Genet	rs1570
10.1038/s41588-021-00801-6	CL_0000700	Response eQTL	-0.29571	Cell Proliferation On Day 52; Treated With Rotenone	Dopaminergic Neurons	GNL3	1	chr3:52551974-52551975	2.00684e-07	0.05688	Jerber2021NG	Jerber-2021-Nat. Genet	rs1961958
10.1038/s41588-021-00801-6	CL_0000700	Response eQTL	-0.29571	Cell Proliferation On Day 52; Treated With Rotenone	Dopaminergic Neurons	GNL3	1	chr3:52551744-52551745	2.00684e-07	0.05688	Jerber2021NG	Jerber-2021-Nat. Genet	rs1961959
10.1038/s41588-021-00801-6	CL_0000700	Response eQTL	-0.29014	Cell Proliferation On Day 52; Treated With Rotenone	Dopaminergic Neurons	GNL3	1	chr3:52550771-52550772	2.06002e-07	0.05586	Jerber2021NG	Jerber-2021-Nat. Genet	rs2251219
10.1038/s41588-021-00801-6	CL_0000700	Response eQTL	-0.27294	Cell Proliferation On Day 52; Treated With Rotenone	Dopaminergic Neurons	GNL3	1	chr3:52550699-52550700	2.37037e-06	0.05784	Jerber2021NG	Jerber-2021-Nat. Genet	rs2878628
10.1038/s41588-021-00801-6	CL_0000700	Response eQTL	-0.24032	Cell Proliferation On Day 52; Treated With Rotenone	Dopaminergic Neurons	GNL3	1	chr3:52547419-52547420	5.93834e-05	0.05985	Jerber2021NG	Jerber-2021-Nat. Genet	rs3199918
10.1038/s41588-021-00801-6	CL_0000700	Response eQTL	-0.23617	Cell Proliferation On Day 52; Treated With Rotenone	Dopaminergic Neurons	GNL3	1	chr3:52541815-52541816	1.08585e-04	0.06102	Jerber2021NG	Jerber-2021-Nat. Genet	rs1133415
10.1038/s41588-021-00801-6	CL_0000700	Response eQTL	-0.25541	Cell Proliferation On Day 52; Treated With Rotenone	Dopaminergic Neurons	GNL3	1	chr3:52539828-52539829	1.19540e-05	0.05833	Jerber2021NG	Jerber-2021-Nat. Genet	rs62256903
10.1038/s41588-021-00801-6	CL_0000700	Response eQTL	-0.25137	Cell Proliferation On Day 52; Treated With Rotenone	Dopaminergic Neurons	GNL3	1	chr3:52539080-52539081	1.97836e-05	0.05891	Jerber2021NG	Jerber-2021-Nat. Genet	rs13076398
10.1038/s41588-021-00801-6	CL_0000700	Response eQTL	-0.24158	Cell Proliferation On Day 52; Treated With Rotenone	Dopaminergic Neurons	GNL3	1	chr3:52538431-52538432	6.52243e-05	0.0605	Jerber2021NG	Jerber-2021-Nat. Genet	rs6445528
10.1038/s41588-021-00801-6	CL_0000700	Response eQTL	-0.24053	Cell Proliferation On Day 52; Treated With Rotenone	Dopaminergic Neurons	GNL3	1	chr3:52538040-52538041	7.09856e-05	0.06054	Jerber2021NG	Jerber-2021-Nat. Genet	rs7638808
10.1038/s41588-021-00801-6	CL_0000700	Response eQTL	-0.25137	Cell Proliferation On Day 52; Treated With Rotenone	Dopaminergic Neurons	GNL3	1	chr3:52535082-52535083	1.97836e-05	0.05891	Jerber2021NG	Jerber-2021-Nat. Genet	rs4687626
10.1038/s41588-021-00801-6	CL_0000700	Response eQTL	-0.20126	Cell Proliferation On Day 52; Treated With Rotenone	Dopaminergic Neurons	GNL3	1	chr3:52533601-52533602	1.43525e-04	0.05293	Jerber2021NG	Jerber-2021-Nat. Genet	rs66782572
10.1038/s41588-021-00801-6	CL_0000700	Response eQTL	-0.25137	Cell Proliferation On Day 52; Treated With Rotenone	Dopaminergic Neurons	GNL3	1	chr3:52533172-52533173	1.97836e-05	0.05891	Jerber2021NG	Jerber-2021-Nat. Genet	rs28661185
10.1038/s41588-021-00801-6	CL_0000700	Response eQTL	-0.21414	Cell Proliferation On Day 52; Treated With Rotenone	Dopaminergic Neurons	GNL3	1	chr3:52532998-52532999	9.88002e-05	0.055	Jerber2021NG	Jerber-2021-Nat. Genet	rs12489828
10.1038/s41588-021-00801-6	CL_0000700	Response eQTL	-0.21414	Cell Proliferation On Day 52; Treated With Rotenone	Dopaminergic Neurons	GNL3	1	chr3:52532898-52532899	9.88002e-05	0.055	Jerber2021NG	Jerber-2021-Nat. Genet	rs7614981
10.1038/s41588-021-00801-6	CL_0000700	Response eQTL	-0.27404	Cell Proliferation On Day 52; Treated With Rotenone	Dopaminergic Neurons	GNL3	1	chr3:52532804-52532805	3.59215e-06	0.05914	Jerber2021NG	Jerber-2021-Nat. Genet	rs12489732
10.1038/s41588-021-00801-6	CL_0000700	Response eQTL	-0.25137	Cell Proliferation On Day 52; Treated With Rotenone	Dopaminergic Neurons	GNL3	1	chr3:52529702-52529703	1.97836e-05	0.05891	Jerber2021NG	Jerber-2021-Nat. Genet	rs4687625
10.1038/s41588-021-00801-6	CL_0000700	Response eQTL	-0.25744	Cell Proliferation On Day 52; Treated With Rotenone	Dopaminergic Neurons	GNL3	1	chr3:52529556-52529557	1.42330e-05	0.05931	Jerber2021NG	Jerber-2021-Nat. Genet	rs4687624
10.1038/s41588-021-00801-6	CL_0000700	Response eQTL	-0.25571	Cell Proliferation On Day 52; Treated With Rotenone	Dopaminergic Neurons	GNL3	1	chr3:52527763-52527764	9.93796e-06	0.05787	Jerber2021NG	Jerber-2021-Nat. Genet	rs11711421
10.1038/s41588-021-00801-6	CL_0000700	Response eQTL	-0.25137	Cell Proliferation On Day 52; Treated With Rotenone	Dopaminergic Neurons	GNL3	1	chr3:52526005-52526006	1.97836e-05	0.05891	Jerber2021NG	Jerber-2021-Nat. Genet	rs4475032
10.1038/s41588-021-00801-6	CL_0000700	Response eQTL	-0.25137	Cell Proliferation On Day 52; Treated With Rotenone	Dopaminergic Neurons	GNL3	1	chr3:52524888-52524889	1.97836e-05	0.05891	Jerber2021NG	Jerber-2021-Nat. Genet	rs34005367
10.1038/s41588-021-00801-6	CL_0000700	Response eQTL	-0.25571	Cell Proliferation On Day 52; Treated With Rotenone	Dopaminergic Neurons	GNL3	1	chr3:52524117-52524118	9.93796e-06	0.05787	Jerber2021NG	Jerber-2021-Nat. Genet	rs13621
10.1038/s41588-021-00801-6	CL_0000700	Response eQTL	-0.25137	Cell Proliferation On Day 52; Treated With Rotenone	Dopaminergic Neurons	GNL3	1	chr3:52523022-52523023	1.97836e-05	0.05891	Jerber2021NG	Jerber-2021-Nat. Genet	rs4234633
10.1038/s41588-021-00801-6	CL_0000700	Response eQTL	-0.24629	Cell Proliferation On Day 52; Treated With Rotenone	Dopaminergic Neurons	GNL3	1	chr3:52522874-52522875	3.34738e-05	0.05937	Jerber2021NG	Jerber-2021-Nat. Genet	rs4434138
10.1038/s41588-021-00801-6	CL_0000700	Response eQTL	-0.25137	Cell Proliferation On Day 52; Treated With Rotenone	Dopaminergic Neurons	GNL3	1	chr3:52512804-52512805	1.97836e-05	0.05891	Jerber2021NG	Jerber-2021-Nat. Genet	rs2015971
10.1038/s41588-021-00801-6	CL_0000700	Response eQTL	0.21343	Cell Proliferation On Day 52; Treated With Rotenone	Dopaminergic Neurons	GNL3	1	chr3:52508903-52508904	1.05838e-04	0.05505	Jerber2021NG	Jerber-2021-Nat. Genet	rs1010554
10.1038/s41588-021-00801-6	CL_0000700	Response eQTL	0.21744	Cell Proliferation On Day 52; Treated With Rotenone	Dopaminergic Neurons	GNL3	1	chr3:52507237-52507238	9.31378e-05	0.05564	Jerber2021NG	Jerber-2021-Nat. Genet	rs11130306
10.1038/s41588-021-00801-6	CL_0000700	Response eQTL	0.21744	Cell Proliferation On Day 52; Treated With Rotenone	Dopaminergic Neurons	GNL3	1	chr3:52506757-52506758	9.31378e-05	0.05564	Jerber2021NG	Jerber-2021-Nat. Genet	rs1010553
10.1038/s41588-021-00801-6	CL_0000700	Response eQTL	-0.27721	Cell Proliferation On Day 52; Treated With Rotenone	Dopaminergic Neurons	GNL3	1	chr3:52506528-52506529	2.26898e-06	0.05863	Jerber2021NG	Jerber-2021-Nat. Genet	rs1010552
10.1038/s41588-021-00801-6	CL_0000700	Response eQTL	-0.27243	Cell Proliferation On Day 52; Treated With Rotenone	Dopaminergic Neurons	GNL3	1	chr3:52502498-52502499	4.27913e-06	0.05926	Jerber2021NG	Jerber-2021-Nat. Genet	rs731831
10.1038/s41588-021-00801-6	CL_0000700	Response eQTL	-0.19893	Cell Proliferation On Day 52; Treated With Rotenone	Dopaminergic Neurons	GNL3	0	chr3:52498275-52498276	1.54690e-04	0.05258	Jerber2021NG	Jerber-2021-Nat. Genet	rs34736619
10.1038/s41588-021-00801-6	CL_0000700	Response eQTL	-0.20338	Cell Proliferation On Day 52; Treated With Rotenone	Dopaminergic Neurons	GNL3	1	chr3:52473703-52473704	1.26563e-04	0.05306	Jerber2021NG	Jerber-2021-Nat. Genet	rs13094915
10.1038/s41588-021-00801-6	CL_0000700	Response eQTL	0.24846	Cell Proliferation On Day 52; Treated With Rotenone	Dopaminergic Neurons	GNL3	1	chr3:52433247-52433248	2.74793e-05	0.05925	Jerber2021NG	Jerber-2021-Nat. Genet	rs648514
10.1038/s41588-021-00801-6	CL_0000700	Response eQTL	-0.2661	Cell Proliferation On Day 52; Treated With Rotenone	Dopaminergic Neurons	GNL3	1	chr3:52430811-52430812	1.13522e-05	0.06062	Jerber2021NG	Jerber-2021-Nat. Genet	rs62257614
10.1038/s41588-021-00801-6	CL_0000700	Response eQTL	-0.2811	Cell Proliferation On Day 52; Treated With Rotenone	Dopaminergic Neurons	GNL3	1	chr3:52422957-52422958	1.83860e-06	0.05893	Jerber2021NG	Jerber-2021-Nat. Genet	rs2272088
10.1038/s41588-021-00801-6	CL_0000700	Response eQTL	-0.2811	Cell Proliferation On Day 52; Treated With Rotenone	Dopaminergic Neurons	GNL3	1	chr3:52416027-52416028	1.83860e-06	0.05893	Jerber2021NG	Jerber-2021-Nat. Genet	rs13094687
10.1038/s41588-021-00801-6	CL_0000700	Response eQTL	-0.28311	Cell Proliferation On Day 52; Treated With Rotenone	Dopaminergic Neurons	GNL3	1	chr3:52373025-52373026	1.51776e-06	0.05887	Jerber2021NG	Jerber-2021-Nat. Genet	rs1546737
10.1038/s41588-021-00801-6	CL_0000700	Response eQTL	-0.26868	Cell Proliferation On Day 52; Treated With Rotenone	Dopaminergic Neurons	GNL3	1	chr3:52352792-52352793	2.01279e-05	0.06302	Jerber2021NG	Jerber-2021-Nat. Genet	rs62257591
10.1038/s41588-021-00801-6	CL_0000700	Response eQTL	-0.36022	Cell Proliferation On Day 52; Treated With Rotenone	Dopaminergic Neurons	GNL3	1	chr3:52330152-52330153	1.32520e-04	0.09426	Jerber2021NG	Jerber-2021-Nat. Genet	rs79840844
10.1038/s41588-021-00801-6	CL_0000700	Response eQTL	-0.29682	Cell Proliferation On Day 52; Treated With Rotenone	Dopaminergic Neurons	GNL3	1	chr3:52315396-52315397	9.01840e-07	0.06043	Jerber2021NG	Jerber-2021-Nat. Genet	rs3852064
10.1038/s41588-021-00801-6	CL_0000700	Response eQTL	-0.29682	Cell Proliferation On Day 52; Treated With Rotenone	Dopaminergic Neurons	GNL3	1	chr3:52315188-52315189	9.01840e-07	0.06043	Jerber2021NG	Jerber-2021-Nat. Genet	rs3852063
10.1038/s41588-021-00801-6	CL_0000700	Response eQTL	-0.29682	Cell Proliferation On Day 52; Treated With Rotenone	Dopaminergic Neurons	GNL3	1	chr3:52307199-52307200	9.01840e-07	0.06043	Jerber2021NG	Jerber-2021-Nat. Genet	rs3844291
10.1038/s41588-021-00801-6	CL_0000700	Response eQTL	-0.28811	Cell Proliferation On Day 52; Treated With Rotenone	Dopaminergic Neurons	GNL3	1	chr3:52304836-52304837	6.90539e-06	0.06407	Jerber2021NG	Jerber-2021-Nat. Genet	rs9311474
10.1038/s41588-021-00801-6	CL_0000700	Response eQTL	-0.28811	Cell Proliferation On Day 52; Treated With Rotenone	Dopaminergic Neurons	GNL3	1	chr3:52299655-52299656	6.90539e-06	0.06407	Jerber2021NG	Jerber-2021-Nat. Genet	rs7622851
10.1038/s41588-021-00801-6	CL_0000700	Response eQTL	-0.28811	Cell Proliferation On Day 52; Treated With Rotenone	Dopaminergic Neurons	GNL3	1	chr3:52291743-52291744	6.90539e-06	0.06407	Jerber2021NG	Jerber-2021-Nat. Genet	rs2276834
10.1038/s41588-021-00801-6	CL_0000700	Response eQTL	-0.29682	Cell Proliferation On Day 52; Treated With Rotenone	Dopaminergic Neurons	GNL3	1	chr3:52288781-52288782	9.01840e-07	0.06043	Jerber2021NG	Jerber-2021-Nat. Genet	rs34228726
10.1038/s41588-021-00801-6	CL_0000700	Response eQTL	-0.29682	Cell Proliferation On Day 52; Treated With Rotenone	Dopaminergic Neurons	GNL3	1	chr3:52288401-52288402	9.01840e-07	0.06043	Jerber2021NG	Jerber-2021-Nat. Genet	rs57615517
10.1038/s41588-021-00801-6	CL_0000700	Response eQTL	-0.28811	Cell Proliferation On Day 52; Treated With Rotenone	Dopaminergic Neurons	GNL3	1	chr3:52274829-52274830	6.90539e-06	0.06407	Jerber2021NG	Jerber-2021-Nat. Genet	rs6445358
10.1038/s41588-021-00801-6	CL_0000700	Response eQTL	-0.29682	Cell Proliferation On Day 52; Treated With Rotenone	Dopaminergic Neurons	GNL3	1	chr3:52273153-52273154	9.01840e-07	0.06043	Jerber2021NG	Jerber-2021-Nat. Genet	rs59565798
10.1038/s41588-021-00801-6	CL_0000700	Response eQTL	-0.28811	Cell Proliferation On Day 52; Treated With Rotenone	Dopaminergic Neurons	GNL3	1	chr3:52271617-52271618	6.90539e-06	0.06407	Jerber2021NG	Jerber-2021-Nat. Genet	rs7629072
10.1038/s41588-021-00801-6	CL_0000700	Response eQTL	-0.28811	Cell Proliferation On Day 52; Treated With Rotenone	Dopaminergic Neurons	GNL3	1	chr3:52261879-52261880	6.90539e-06	0.06407	Jerber2021NG	Jerber-2021-Nat. Genet	rs7614727
10.1038/s41588-021-00801-6	CL_0000700	Response eQTL	-0.22863	Cell Proliferation On Day 52; Treated With Rotenone	Dopaminergic Neurons	GNL3	1	chr3:52255693-52255694	1.62267e-04	0.06062	Jerber2021NG	Jerber-2021-Nat. Genet	rs11542804
10.1038/s41588-021-00801-6	CL_0000700	Response eQTL	-0.28811	Cell Proliferation On Day 52; Treated With Rotenone	Dopaminergic Neurons	GNL3	1	chr3:52254929-52254930	6.90539e-06	0.06407	Jerber2021NG	Jerber-2021-Nat. Genet	rs1060330
10.1038/s41588-021-00801-6	CL_0000700	Response eQTL	-0.29043	Cell Proliferation On Day 52; Treated With Rotenone	Dopaminergic Neurons	GNL3	1	chr3:52253452-52253453	5.95849e-06	0.06414	Jerber2021NG	Jerber-2021-Nat. Genet	rs11717383
10.1038/s41588-021-00801-6	CL_0000700	Response eQTL	-0.29682	Cell Proliferation On Day 52; Treated With Rotenone	Dopaminergic Neurons	GNL3	1	chr3:52253277-52253278	9.01840e-07	0.06043	Jerber2021NG	Jerber-2021-Nat. Genet	rs34569561
10.1038/s41588-021-00801-6	CL_0000700	Response eQTL	-0.29682	Cell Proliferation On Day 52; Treated With Rotenone	Dopaminergic Neurons	GNL3	1	chr3:52245578-52245579	9.01840e-07	0.06043	Jerber2021NG	Jerber-2021-Nat. Genet	rs7618915
10.1038/s41588-021-00801-6	CL_0000700	Response eQTL	-0.29682	Cell Proliferation On Day 52; Treated With Rotenone	Dopaminergic Neurons	GNL3	0	chr3:52243429-52243430	9.01840e-07	0.06043	Jerber2021NG	Jerber-2021-Nat. Genet	rs57630131
10.1038/s41588-021-00801-6	CL_0000700	Response eQTL	0.29105	Cell Proliferation On Day 52; Treated With Rotenone	Dopaminergic Neurons	GNL3	1	chr3:52239405-52239406	6.02428e-06	0.06431	Jerber2021NG	Jerber-2021-Nat. Genet	rs610060
10.1038/s41588-021-00801-6	CL_0000700	Response eQTL	0.255	Cell Proliferation On Day 52; Treated With Rotenone	Dopaminergic Neurons	GNL3	1	chr3:52234850-52234851	1.53468e-05	0.05898	Jerber2021NG	Jerber-2021-Nat. Genet	rs353547
10.1038/s41588-021-00801-6	CL_0000700	Response eQTL	-0.2589	Cell Proliferation On Day 52; Treated With Rotenone	Dopaminergic Neurons	GNL3	1	chr3:52233716-52233717	1.18231e-05	0.0591	Jerber2021NG	Jerber-2021-Nat. Genet	rs2267847
10.1038/s41588-021-00801-6	CL_0000700	Response eQTL	-0.24961	Cell Proliferation On Day 52; Treated With Rotenone	Dopaminergic Neurons	GNL3	1	chr3:52227015-52227016	9.98598e-06	0.0565	Jerber2021NG	Jerber-2021-Nat. Genet	rs187084
10.1038/s41588-021-00801-6	CL_0000700	Response eQTL	-0.2333	Cell Proliferation On Day 52; Treated With Rotenone	Dopaminergic Neurons	GNL3	1	chr3:52224356-52224357	7.39902e-05	0.05887	Jerber2021NG	Jerber-2021-Nat. Genet	rs352139
10.1038/s41588-021-00801-6	CL_0000700	Response eQTL	-0.22102	Cell Proliferation On Day 52; Treated With Rotenone	Dopaminergic Neurons	GNL3	1	chr3:52222681-52222682	1.81189e-04	0.05904	Jerber2021NG	Jerber-2021-Nat. Genet	rs352140
10.1038/s41588-021-00801-6	CL_0000700	Response eQTL	-0.21536	Cell Proliferation On Day 52; Treated With Rotenone	Dopaminergic Neurons	GNL3	1	chr3:52218953-52218954	2.42886e-04	0.05869	Jerber2021NG	Jerber-2021-Nat. Genet	rs352162
10.1038/s41588-021-00801-6	CL_0000700	Response eQTL	-0.27587	Cell Proliferation On Day 52; Treated With Rotenone	Dopaminergic Neurons	GNL3	1	chr3:52210035-52210036	1.41898e-06	0.05721	Jerber2021NG	Jerber-2021-Nat. Genet	rs11712164
10.1038/s41588-021-00801-6	CL_0000700	Response eQTL	-0.26117	Cell Proliferation On Day 52; Treated With Rotenone	Dopaminergic Neurons	GNL3	1	chr3:52207819-52207820	8.93877e-06	0.0588	Jerber2021NG	Jerber-2021-Nat. Genet	rs6802320
10.1038/s41588-021-00801-6	CL_0000127	Response eQTL	-0.29741	Cell Proliferation On Day 52; Treated With Rotenone	Astrocyte-like Cells	GNL3	0	chr3:52859449-52859450	9.07789e-05	0.07598	Jerber2021NG	Jerber-2021-Nat. Genet	rs6798941
10.1038/s41588-021-00801-6	CL_0000127	Response eQTL	-0.28902	Cell Proliferation On Day 52; Treated With Rotenone	Astrocyte-like Cells	GNL3	1	chr3:52813585-52813586	7.06097e-05	0.07272	Jerber2021NG	Jerber-2021-Nat. Genet	rs2071044
10.1038/s41588-021-00801-6	CL_0000127	Response eQTL	-0.29942	Cell Proliferation On Day 52; Treated With Rotenone	Astrocyte-like Cells	GNL3	1	chr3:52811089-52811090	3.33939e-05	0.07217	Jerber2021NG	Jerber-2021-Nat. Genet	rs2535627
10.1038/s41588-021-00801-6	CL_0000127	Response eQTL	-0.30174	Cell Proliferation On Day 52; Treated With Rotenone	Astrocyte-like Cells	GNL3	1	chr3:52804386-52804387	1.90711e-05	0.07057	Jerber2021NG	Jerber-2021-Nat. Genet	rs4687552
10.1038/s41588-021-00801-6	CL_0000127	Response eQTL	-0.30174	Cell Proliferation On Day 52; Treated With Rotenone	Astrocyte-like Cells	GNL3	1	chr3:52803839-52803840	1.90711e-05	0.07057	Jerber2021NG	Jerber-2021-Nat. Genet	rs2710331
10.1038/s41588-021-00801-6	CL_0000127	Response eQTL	-0.29942	Cell Proliferation On Day 52; Treated With Rotenone	Astrocyte-like Cells	GNL3	1	chr3:52803777-52803778	3.33939e-05	0.07217	Jerber2021NG	Jerber-2021-Nat. Genet	rs4481150
10.1038/s41588-021-00801-6	CL_0000127	Response eQTL	-0.28542	Cell Proliferation On Day 52; Treated With Rotenone	Astrocyte-like Cells	GNL3	1	chr3:52801338-52801339	4.58518e-05	0.07003	Jerber2021NG	Jerber-2021-Nat. Genet	rs736408
10.1038/s41588-021-00801-6	CL_0000127	Response eQTL	-0.29712	Cell Proliferation On Day 52; Treated With Rotenone	Astrocyte-like Cells	GNL3	1	chr3:52799789-52799790	3.62627e-05	0.07194	Jerber2021NG	Jerber-2021-Nat. Genet	rs3617
10.1038/s41588-021-00801-6	CL_0000127	Response eQTL	-0.284	Cell Proliferation On Day 52; Treated With Rotenone	Astrocyte-like Cells	GNL3	1	chr3:52799203-52799204	4.83836e-05	0.06989	Jerber2021NG	Jerber-2021-Nat. Genet	rs2535629
10.1038/s41588-021-00801-6	CL_0000127	Response eQTL	-0.33026	Cell Proliferation On Day 52; Treated With Rotenone	Astrocyte-like Cells	GNL3	1	chr3:52797685-52797686	3.51252e-06	0.0712	Jerber2021NG	Jerber-2021-Nat. Genet	rs2240919
10.1038/s41588-021-00801-6	CL_0000127	Response eQTL	-0.33376	Cell Proliferation On Day 52; Treated With Rotenone	Astrocyte-like Cells	GNL3	1	chr3:52796993-52796994	1.17480e-06	0.06868	Jerber2021NG	Jerber-2021-Nat. Genet	rs2240920
10.1038/s41588-021-00801-6	CL_0000127	Response eQTL	-0.3433	Cell Proliferation On Day 52; Treated With Rotenone	Astrocyte-like Cells	GNL3	1	chr3:52794612-52794613	1.07037e-06	0.07037	Jerber2021NG	Jerber-2021-Nat. Genet	rs9881468
10.1038/s41588-021-00801-6	CL_0000127	Response eQTL	-0.33376	Cell Proliferation On Day 52; Treated With Rotenone	Astrocyte-like Cells	GNL3	1	chr3:52793899-52793900	1.17480e-06	0.06868	Jerber2021NG	Jerber-2021-Nat. Genet	rs2239699
10.1038/s41588-021-00801-6	CL_0000127	Response eQTL	-0.33376	Cell Proliferation On Day 52; Treated With Rotenone	Astrocyte-like Cells	GNL3	1	chr3:52793550-52793551	1.17480e-06	0.06868	Jerber2021NG	Jerber-2021-Nat. Genet	rs4687654
10.1038/s41588-021-00801-6	CL_0000127	Response eQTL	-0.33315	Cell Proliferation On Day 52; Treated With Rotenone	Astrocyte-like Cells	GNL3	1	chr3:52792830-52792831	1.19446e-06	0.0686	Jerber2021NG	Jerber-2021-Nat. Genet	rs2071508
[truncated: 1,745 more rows]

## Sheet: MR results
id.exposure	id.outcome	outcome	exposure	method	nsnp	b	se	pval	lo_ci	up_ci	or	or_lci95	or_uci95	p_fdr
[truncated: 47 more rows]

## Sheet: coloc Results
Exposure	Outcome	nsnps	PP.H0	PP.H1	PP.H2	PP.H3	PP.H4
[truncated: 43 more rows]
